# Supplementary material
Source: PubMed Central journal article supplement (PMC2151690)
Supplement: plntphys_pp.107.104901_1.pdf [file plntphys_pp.107.104901_1.pdf]

## Supplementary Figure S1

Protein sequence of D-type cyclins in mammals and plants. Light and dark grey boxes identify individual exons. The cyclin box is shown in red bold to illustrate that in most cases (other than plant CYCD3) it is found at the end of exon 1 and beginning of exon 2.

### Human CYCD

#### >HsCYCD1 (NM\_053056)

```
MEHQLLCCEVETIRRAYPDANLLNDRVLRAMLKAEETCAPSVSYFKCVQKEVLPMSRKIVATWMLEVCEEQK  
CEEEVFPLAMNYLDRFLSLEPVKKSRLQLLGATCMFVASKMKETIPLTAEKLCIYTDNSIRPEELLQMELLL  
VNKLKWNLAAMTPHDFIEHFLSKMPEAEENKQIIRKHAQTFVALCATDVKFI SNPPSMVAAGSVVAAVQGLN  
LRSPNNFLSYRLTRFLSRVIKCDPDCLRACQEQIEALLESSLRQAQQNMDPKAAEEEEEEEEVDLACTPT  
DVRDVI*
```

#### >HsCYCD2 (NM\_001759)

```
MELLCHEVDPVRRAVRDRNLLRDDRVLQNLLETIEERYLPQCSYFKCVQKDIQPYMRRMVATWMLEVCEEQK  
EEEFVPLAMNYLDRFLAGVPTPKSHLQLLGAVCMFLASKLKETSPLTAEKLCIYTDNSIKPQELLEWELVVL  
GKLLKWNLAAVTPHDFIEHILRKLPOQREKLSLIRKHAQTFIALCATDFKFKAMYPPSMIATGSVGAAICGLQQ  
DEEVSSLTCDALTELLAKITNTDVEDCLKACQEQIEAVLLNSLQYRQDQRDQDGSKSEDELQASTPTDVRDID  
L*
```

#### >HsCYCD3 (NM\_001760)

```
MELLCCEGTRHAPRAGPDRLLGDQRVLQSLRLEERYVPRASYFQCVQREIKPHMRKMLAYWMLEVCEEQR  
CEEEVFPLAMNYLDRYLSVCPTRKAQLQLLGAVCMFLASKLRETTPLTIEKLCIYTDHAVSPRQLRDWEVLV  
LGKLLKWDLAAVIAHDFLAFILHRLSLPRDRQALVKKHAQTFALCATDYTFAMYPPSMIATGSI GAAVQGLG  
ACSMGDELTELLAGITGTEVDCLRACQEQIEAALRESLREASQTSSSPAPKAPRGSSSQGPSQTSTPTDVT  
AIHL*
```

### Moss CYCD

#### >Phypa;CYCD (AJ488282)

```
MSPSVDCLASLYCAEDVSGTAWNESEMCGAADRVFESQPAVFMDFPVEDDEAIATLLMKEAQFMPEADYLER  
YQSRKLSLEARLAAIEWILKVHSFYNYSPLTVALAVNYMDRFLSRYFPEGKEWMLQLLSVACISLAAKMEE  
SDVPILLDFQVEQEEHIFEAHTIQRMELLVLSLEWRMSGVTPFSYVDYFFHKLGVSDLLLRLALLSRVSEII  
LKSIRVTTSLQYLPSVVAASIICALEEVTTIRTGDLRLTFNELLVNVESVKDCYIDMRQSEIGPYCVRMGL  
KRKILHASEPQSPVGVLEAADVSSPSGTVLGFSSRESSPDVTDSPSTNSQRKRKRLCLHNE SCLHVESASL  
*
```

### Arabidopsis CYCD

#### >Arath;CYCD1;1 (AT1G70210)

```
MRSYRFSDYLHMSVSFSNDMDLFCGEDSGVFSGESTVDFSSSEVDSWPGDSIACFIEDERHFVPGHDYLSRF  
QTRSLDASAREDSVAWILKVQAYYNFQPLTAYLAVNYMDRFLYARRLPETSGWPMQLLAVACL SLAAKMEEI  
LVPSLFDVFQVAGVKYLFEAKTIKRMELLVLSVLDWRLRSVTPFDLISFFAYKIDPSGTF LGFFISHATEIIL  
SNIKEASFLEYWPSSIAAAAILCVANELPSLSSVNPHE SPETWCDGLSKEKIVRCYRLMKAMAIENNRLNT  
PKVIAKLRSVASSTLTRPSDESSFS SSPCKRRKLSGYSWVGDETSTSN*
```

#### >Arath;CYCD2;1 (AT2G22490)

```
MAENLACGETSESWIIDNDDDDINYGGGFTNEIDYNHQLFAKDDNFGGNGSIPMMGSSSSSLSEDRIKEMLV  
REIEFCPGTDYVKRLLSGDLDSLVRNQALDWILKVCAHYHFGHLCICLSMNYLDRFLTSYELPKDKDWAQQL  
LAVSCLSLASKMEETDVPHIVDLQVEDPKFVFEAKTIKRMELLVVTTLNWRLQALTPFSFIDYFVDKISGHV
```

SENLIYRSSRFILNTTKAIEFLDFRPSEIAAAAAVSVSISGETECIDEKALSSLIYVKQERVKRCNLNLMRS  
LTGEENVRGTSLSQEQARVAVRAVPASVGVLEATCLSYRSEERTVESCTNSSQSSPDNNNNNNNSNKRRR  
Q\*

>Arath;CYCD3;1 (AT4G34160)

MAIRKEEESREEQNSNFLLDALYCEEEKWDDGEEVEENSSLSSSSSSPFVVLQQDLFWEDEDLVTLSKEEE  
QGLSCLDDVYLSTDRKEAVGWILRVNAHYGFSTLAAVLAITYLDFKFCISYSLQRDKPWMLQLVSVACL SLAA  
KVEETQVPLLLDFQVEETKYVFEAKTIQRMELLILSTLEWKMHLPITPISFVDHIIRRLGLKNNAHWDFLNKC  
HRLLLSVISDRFVGYLPSVVAATMMRIIEQVDPFDPLSYQTNLLGVLNLTKEKVKTCYDLILQLPVDRIG  
LQIQIQSSKKRKSHDSSSSLNPSVIDANPFNSDESSNDSWSASSCNPPTSSSSPQQQPPLKKMRGAENE  
KKKPILHLPWAIVATP\*

>Arath;CYCD3;2 (AT5G67260)

MALEKEEESQNGAFVLDGLYCEEETGFVEDDLDGDLDFLEKSDSVVKFQFLPLLDLDFWDDDEILSL  
ISKENETNPCFGEQILDGFLVSCRKEALDWVLRVKSHYGFTSLTAVNYFDRFMTSIKLTQDKPWMSQLV  
AVASLSLAAKVEEIQVPLLLDLQVEEARLYFEAKTIQRMELLILSTLQWRMHPVTPISFFDHIIRRFKSKWH  
QQLDGFCRKCERLLISVIADTRFMRYFPSVLATAIMILVFEELKPCDEVEYQSQITTLKVNQEKVNECYELL  
LEHNPSKKRMMNLVDQDPSGVLDGDDSSNSWVSTTASVSSSSSSPEPLLKRRRVQEQQMRLPSINRMFL  
DVLSSPR\*

>Arath;CYCD3;3 (AT3G50070)

MALEEEEEESQNAFVLDGLFCEEESEFHEQVLDLCESEVEKFPFLNLGLSDHMLWDDDELSTLISKQEPCL  
YDEILDDEFVLVCREKALDWIFKVKSHYGFNLSLTALLAVNYFDRFITSRKFQTDKPWMSQLTALACLSLAAK  
VEEIRVPFLLDQVEEARLYFEAKTIQRMELLVLSTLDWRMHPVTPISFFDHIIRRYFVKSHHQLEFLSRCE  
SLLLSIIPDSRFLSFSVSVLATAIMVSVIRDLKMCDEAVYQSQMLTLLKVDSEKVNKCYELVLDHSPSKRM  
MNMWQQPASPIGVFDASFSSDSSNESWVVSASASVSSSPSEPLLKRRRVQEQQMRLSSINRMFFDVLSSSP  
R\*

>Arath;CYCD4;1 (AT5G65420)

MAEENLELSLLCTESNVDDGEMIVDETPIEISIPQMGFSQSESEEIMEMVEKEKQHLPSDDYIKRLRSGDL  
DLNVGRRDALNWIKWACEVHQFGPLCFCLAMNYLDRFLSVHDLPSGKGWILQLLAVACL SLAAKIEETEVEPM  
LIDLQVGDQPQVFEAKSVQRMELLVLNKLKWLRLRAITPCSYIRYFLRKMSKCDQEPSNTLISRLQVIASST  
KGIDFLEFRPSEVAAVALSVSGELQRVHFDNSSFPLFSLQKERVKKIGEMIESDGSDLCSQTPNGVLEV  
SACCFKTHDSSSYTHLS\*

>Arath;CYCD4;2 (AT5G10440)

MAEFMEPNLVSNFDDKESNSVDTRSIFQMGFPLESEEIVREMIKERQHSRDDYLRKLRNGDLDFNVRIQA  
LGWIKWACEELQFGPLCICLAMNYLDRFLSVHDLPSGKAWTVQLLAVACL SLAAKIEETNPPELMQLQVGAP  
MFVFEAKSVQRMELLVLNVLWRRLRAVTPCSYVRYFLSKINGYDQEPHSRLVTRSLQVIASSTTKGIDFLEFR  
ASEIAAVALSVSGEHFDKFSFSSSFSSLEKERVKKIGEMIERDGSSSSSQTPNNTVLQFKSRRYSLSLSTA  
SVSSSLTSL\*

>Arath;CYCD5;1 (AT4G37630)

MGEPKDSLALFLCHESESSLNEDDDETIERSDKQEPHFTTTIDDEDYVADLVLKENLRFETLPSKTTSSSDR  
LIAIDWILTRTRRFQFQHTAYIAISYFDLFLHKRFIQLQKDETWAMRLLSVACL SLAAKMEERIVPGLSQY  
PQDHDFVFKPDVIRKTELLILSTLDWKMNLITPFHYFNYFLAKISQDNHNSVSKDLVLLRSSDLSLALTKEIS  
FTEYRQFVVAAVTTLLASSSTSSDIRLTREEIANKFGSISWWTSNENENVYLCYQRTLEIEERKHMTPPPEI  
AVSREPPASGSGAKRRLSFDDSDQSSPPAKRMRL\*

>Arath;CYCD6;1 (AT4G03270)

MEFHLEHPLSHSSLHNNFNDDTDYETLPHSLFLVEFQHMPSSHYFHSLSKSSAFLLSNRNQAISSITQYSRKF  
DDPSLTYLAVNYLDRFLSSEDMPQSKPWILKILSLSCVLSAKMRKPDMSVSDLPVEGEFFDAQMIERMENV  
ILGALKWRMRSVTPFSFLAFFISL FELKEEDPLLLKHSLKSQTSDLTFSLQHDISFLEFKPSVIAGAALLFA  
SFELCPLQFPCFSNRINQCTYVKNDELMECYKAIQERDII VGENEGSTETAVNVLDQQFSSCESDKSITITA  
SSSPKRRKTSTRY\*

>Arath;CYCD7;1 (AT5G02110)

MDNLLCEESWPASPLTPEPLPNFRHRSHDNDVVKMYPEIDAATMEEAIA MDLEKELCFNNHGDKFVEFFVSK  
KLTDYRFHAFQWLIQTRSRLNLSYETVFSANCFDRFVYMTCCDEWTNWMVELVAVTSLSIASKFNEVTTPL

LEELEMEGLTHMFHVNTVAQMELIILKALEWRVNAVTSYTFSSQTLVSKIGMVGDMIMNRITNHLLDVICDL  
KMLQYPPSVVATAAIWILMEDKVCRESIMNLFEQNHKEKIVKCVDMKNRDIHQSSRRRYSEGRSILSLLO  
RGDVMNMNGDYNVEDLSKIFQIFRYEKKRDRGNHQDNIRPAKRMTIEMSNI\*

## Rice CYCD

### >Orysa;CYCD1;1 (Os09g21450)

MPADDDDDASYLLCAEDAGAAVFDVAVDIDISTCTTEDDECCSVGGEEELYSAAISIAELIGGEEAAYSPPSDYPDRL  
RSRSIDPAARAESVSWILKVQEYNGFLPLTAYLAVNYMDRFLSLRHLPEGQGWAMQLLAVACLSLAAKMEET  
LVPSLLDLQVECSRYVFEPRTICRMEFLILTALNWRLRSVTPFTFIDFFACKVDPKGGKHTRYLIARATEMVL  
ATIHGKNTDVFAG\*

### >Orysa;CYCD1;2 (Os06g12980)

MMYKHVGDDARGSSAGVCCVDDVDDVALLCGEDAGELEREGEPAQGSSPSSSLSCAAAAAADDDED  
EDEHGVHGEVQVTPGGEEHCYDYDYDVPVGAELVMPACSPRTAVHRPGWSESVSWILKVRSVHGFQPA  
TAYLAVSYMDRFMSSRSLPDHGWSQLLCAVCLSLAAKMEESSAPPLLDLQIEGTRFIFEPRTIORMELIVL  
VELDWRLRSVTPFAFVDFACKVGGSSRILALRACQIILSAIHELEFLNHCASSMAAAVLFVAVNESPA  
AMSHRSSVSESAASWCIGLTEERISSCYQLLQALNATARKRKRHPMILAACSSVTSSSSRSKRRLDGHF  
GED\*

### >Orysa;CYCD1;3 (Os08g32540)

MGAPATAASGGDDDDRDVVFYLLCTEEDAASAGSFFQQLQGPAPAVSSSPSTTTATAPAAAGSCDDGGEE  
EEEEVWTVDVVAELIGGEEAERSHSPRADYPGRLRSRGPADLAARADSVAVILKVRELYGMLPVTAYLAVSYM  
DRFLSLHRLPGNGWAMQLLAVTCLSLAAKMEETLVPSILDLOMEDARYIFEHRTIFRMELLVLDALDWRLRS  
ITPFTFMYLFAADKVPNGKHIRELIHQATQVTLATIHDFLHDHCPSSIAAAAVLCASSEIMQLVSIHGT  
VSWRIIGLDEEAIIRCYRLMQQLISSNNVGRESTEITMATTTTTATTAVSSEEVSSSPSKRRKM\*

### >Orysa;CYCD2;1 (Os07g42860)

MGVLCFGASNILLCAEDSSSVLGLGGGGGGEVAELGCGGGGGFDFFGGGGAVFPIDSDDEFVALLVEKE  
MDHQQRGYLEKLELGGLECSWRKDAIDWICKVHSYINFGPLSLYLAVNYLDRFLSSFNLPHDESWMQQLS  
VSCLSLATKMEETVVPLPMDLQVDAEYVFEARHIKRMELIVMKTCLKWRLQAVTFFSFIGYFLDKFNEGKPP  
SYTLASWCSDLTVGTLKDSRFLSFRPSEIAAAVVLAVLAENQFLVFNLSALGESEIPVNKEMVMRCYELMVEK  
ALVKKIRNSNASSVPHSPITVLDAACFSEFRSDDTTLGSSQSNNSNNKDYNQDSAPASKRRRLNTPPI\*

### >Orysa;CYCD2;2 (Os06g11410)

MAPSFDAASILLCAEDNTAILDLGEESEEISWVGVVDASLGDLSMDFPLQSDDCIEALLGREEQQHIPMEG  
YLQRLLLQPDGLDLVAVRSDAIDWIKVHELYKFGPLTAVLSVNYLDRFLSVFDLPQEEACMTQLLAVASLS  
LAAKMEETVVPHPLDLQVCDAKYVFETRITKRMELAVLNALKWRMQUAVTACSFIDYLLHKFNDDDDTPSTSAL  
RSVDLILSTCKVAEFLVFRPSEIAASVALVALEEHEHETSMFERVATCYKNLKKERVLRCEYMIQDKIIMRNI  
MRQSAGSVFSIPKSPIGVLDAACISQQSEDTFVGPATNYESSASSKRRRRCR\*

### >Orysa;CYCD2;3 (Os03g27420)

MGFLCRRRSSAAPAESFSLICEEDSESVFGSDDDGVEETATMAPELGKMMSLGFSSASHHLGDGGGGGEEELVG  
SFMEKEVEQMVTARGEYLTKLNSGGIELSCRIAAIDWICKVQAYYSFGPLCAYLAVNYLDRFLSSVEFSVT  
NDMPWMQQLLIVACLSLAAKMEETAAPGTLDLQVCNPEYVFAETIHRMELIVLTTLKWRMQUAVTPTTYIGH  
FLDKINEGNRITSELI SRCTE I I LSTMKATVFLRFRPSEIATAVALSVVADGGRVLDFFGGVLESSKLPVVDK  
NVGRCHQAMQEMALVMQNSTASPSDSLCDMTNPVLDCHILRRREC VSLQSGPRDELEMGWAPFAITVSEKE  
ESERRCDDGWRRGEEAAQYCEQADEQRRSTDGRAGVRLLEEQAGGE\*

### >Orysa;CYCD3;1 (Os09g02360)

MAFATLFDLSLYCPEEHLDFHDTAADDLHLDLHLHQPPPPPLLDLDDLPALFHALRGKEDPLRPAADDDGY  
GGVSAREAAVGVALRAVARLGFSAALAVAYLDRFCFLGGALRLGDRPWMARLAAVACVALAAKVEETRPV  
VLLDLQLCAAERADPNEAYVFEDKTVRRMELLVLSALGWRMHVPVPLSYLQPLLGTAHAARLHHCDTALLAL  
MPDWRWRPRRPSAWAAAALLATAGWCGGGGGDAELLALIDAPKDEMAECAKIISEEAAGGIVIGGEN  
KRKGAAGLYSAPASPSGVIGASACFSCDSSSSSVDSLFAALEPPGRPIKRGAAAATTADPLPADEESRD  
AWPYAA\*

>Orysa;CYCD4;1 (Os09g29100)

MAALTSYEMAASILLC AEDSSSVLGFGE EEEEEEDV VAGKRARCAGPPPPCV DVAGVDFAVPSEECVARL  
VETEADHMPREDYAERLRAGGGDGLDLRVRMDAIDW **IWKVHSYY** SFAPLTA CLAVNYLDRFLSLYQLPDGK  
DWMTQLLAVACL SLAAKMEETDVPQSLDLQVGEERYVFEAKTIQRMELLVLSTLKW RMQAVT PFSYVDYFLR  
ELNGGDPPSGRSALLSSELILCIARGTECLGFRPSEIAAAVAAA VVGE EHA AF SHVNKERMSHCQEVIQAME  
LIHPKSSPSRVFVSSSI PRSPTGVLD AAGCLSYRSDDSAVASHYAASSWG YEHDSSPVSSKRKISR\*

>Orysa;CYCD4;2 (Os08g37390)

MAPSSSSCHDAAASMLLCAEDNSSILWLEDEE EGEVGERSSGGCRSMVGD LAAGGGGGSGGGV EEEEEEDMFPR  
QSEECVASLVEREQAHM PRADYGERLRGGGDVDL RVRSEAIGW **IWEVYTYN** FSSVTAYLAVNYLDRFLSQ  
YELPEGRDWMTQLLSVACL SIAAKMEETVVPQCLDLQIGEP RFLFEVETIHRMELLVLTNLNWRMQAVTPFS  
YIDYFLRKLNSGNAAPRSWLLRSSELILRIAAGTGFLEFRPSEIAAAVAATVAGEATGVVEEDIAEAFTHVD  
KGRVLQCQEAIQDHHYSMATINTVQPKPASTRRGSASASSSSVPESPVAVL DAGCLSYKSDDTDAATIASHG  
GGRRKSCFDSSPVT SKRRKLSR\*

>Orysa;CYCD5;1 (Os12g39830)

MSMEEAE ECSAACGFSLTCQEDGADLGDGVVDDDDGDVFLFYNAVAAAADDEEEEE EYEQMVSKEASFCCS  
SSSSLFDAAAGDGYGDGDGDGDFRQARLA AVKW **ILETGRYF** GFGHRTAYLA IAYFDRFCLRRRV DREAMPW  
AARLLSIACVSVAAKMEEYQSPALSEFDAGGGRVFCSDSIRRMELLVLSTL GWRMGAVTPFDLPCFSSRLH  
RHHHGGAAGAAGHAAAAARVALNAVGFIFATAEAGSVLDYR PSTVAAAAI LAASYGAPLTKEALESKMSNLS  
PSCLIDKENVHACY SMMVGDMMNNRRSSKRPLQCSDSNEITTTSTYDSVLVDDVTDTA AFAATAMNKRLRPE  
PPRIR\*

>Orysa;CYCD5;2 (Os03g42070)

MEAEDEYSAGCSFSLMCQEDSTDLDDDGGGGGCFAGDGRADLLLVYNAAAADDEDEEEVEEYMDHLVSKE S  
SFCSSSSSTSSSSCCFSDAGGESAAAAAPMDW FALARRATVKW **ILETGRCF** GFCHR TAYLA IAYFDRFCLRR  
CIDRSVMPWAARLLAVACVSLAAKMEEYRAPALSEFRAGVGGDGYEFSCVCIRRMELLVLSTLDWRMAAVTP  
FDYLPCLSSRLRRHVGGGGGAGASAALIFSAEAASVLDHRPSTVAAA VLAATHGALTREALESKMSGLSP  
SFLLDKEDVFACYSAMLSQPTSPASKSTTTTTTGKRSSSSSCSESTDAASSYDATAASFPAAASCGSKMRLE  
LPGGILR\*

>Orysa;CYCD5;3 (Os03g10650)

MGDASASTSAPATPTSTL ICREDGNLFSADPADDDGGGGSGGDWELSIADDDHVLLMDRDDEYLALMLSKE  
RCAGGGGGGERGDEEEEEEMVEEWMKNARAWCVGW **IVKTNAGF** RFSLKTAYVAVTYLDRFLARRCVDRDKEWA  
LQLLSVACL SLAAKVEERRPRLPEFKLDMYDCASLRMELLVLTTLKWQMITETPFSYLNCF TAKFRHDER  
KAIVLRAIECIFASIKVISSVGYQPSTIALAA ILIARNKETAPNLDELKSVVGS LWQLD TGHVYSCYNKMM  
IQEDRSMQSTTEVASSGVSAHIGGSEDSAMGGANNATTLEATPDKKRKLHSPQRQ\*

>Orysa;CYCD6;1 (Os07g37010)

MDMATGAKEVVVEAYEYEFDLENPFTSPADEPIASLLDAEGHHS PVSAAA SAARREAAAGF **ISKVRYDGEL**  
DVHPRVAYLALNYVD RYLSKRQLACERNPWPAPRL LAISCLTLAAKMQRAAAI SAADIQRGEEFMFDEAKIQR  
MEQMVLNALEWRTRSVTPLAFLGFFLSACFPQPRHPALLDAIKARAVDLLLRVQPEVKMAEFSPSVA AAAAL  
LAAAGEVAGALLGF EAGVAACPFVNSEKLRCEGVM AAACGVGPSWAAAATSAETPVTVLGHRSASSESE  
RTTTVGSAA NSADAKRRCMGPPRQWGVGGPDE\*

>Orysa;CYCD7;1 (Os11g47950)

MDDDDDTSFNNSLDLYCDEDPFDSTPPPPPPPEQQQQAGTTTTDDIDDEVMEYKAKQR CYALQIRDYCCY  
LQCHHLLLQQQHGVAAR **LKAAMGRL** GLEAATAFNAANYLDRFLS INCHLKWEEWMVEVSVGCLSLACKL  
DEVTIPSLHDLQMEEAMGHSFRASTIRDMELTLLKALRWRLACVTPFSFLPVTTTTTTTTTRALLRSLLDPSF  
LRFDASLLAASALTLSSTTPQHNLHLLNRLIHPFSQTDHEVKECFNMMKALHLDMSKNPGRSSDHPCWSP I  
SVVIPFHTDGTVKRS AISRCLFGSGRLKARSI\*

Poplar CYCD

>Poptr;CYCD1;1 (AM746109)

MSYSDCLSDLLCGEDSSDIFSGESPECSSDLESHDFVEESSIAGFIEDERNFVPGYDYFSRFQSQSLDASAR  
EQSVAWILKVVQACYGFQPLTAYLSVNYLDRFLYSRRLPQTDGWPLQLLSVACL SLAAKMEEP LVP SLLDLQV  
EGAKYIFEPRTIRRMELLVLGVLDWRLRSITPFSFTGFFACKLDPAGAYTGFLISRATEIILSNIKEASFLE  
YRPSSIAAAAAILCAANDIPNLSLVNPEHAESWC DGLSKDKIISCYRLMQDLVLDSSRRKSTKVLLPRLRVTI  
RARMRSSGSDSSSSSSSSSYKKRKLNNCLWVDDDKGNSE\*

>Poptr;CYCD1;2 (AM746110)

MSYSDCLSDLLCGEESDIFSGESPGCSTGLESHDFVEESSIASFIEDERNFVPGFDYLSRFQSQSLDASAR  
EESVAWILKVVQAYHGFQPLTAYLSVNYLDRFFYSRRLPQTDGWWPQLLSVACL SLAAKMEEP LVP SLLDLQV  
EGAKYIFEPRTIRRMELLVLSVLDWRLRSITPFSFTGFFACKLDPAGAYTGFLISRATEIILSNIKEASFLE  
YWPSSIAAAAAILCAANDIPNLP LFNPEHAESWC DGLSKDKIISCYRLMQDLVLDNSRRKSTKVLLPQLRVTI  
RARMRSSGSDSSSSSSSTSSYKKRKLNNCFWVHDDDKGNSE\*

>Poptr;CYCD1;3 (AM746111)

MSPHPSPDHCAAVNSLYCGEDASENTITKFIDSESQFMPLSDYLHRCRHRSIDTTARQDSINWILKVHAHY  
AFRPLTALLSVNYFDRFLSSYSLPENGWPYQILSVACL SLAAKMEEP DVPLLLDLQVLEPGFIFEPKNIQKM  
ELRVMAYLNWRLRSVTPFDYLDYFISKLPSCSSTNPDNFSRLLKDSDDLILNTTRVIDFLGFTPTSTVAAAAA  
ISAAGKSYDTIPWEAGDQFFHERVNMKEMVRSCHQLMEEYLIDTCPLSRHKIDHYPPAPD T LSNFYLY\*

>Poptr;CYCD1;4 (AM746112)

MQVYAHYEFRPLTALLSVNYFDRFLSSYSLPENGWPFQLLSVACL SLAAKMEEP DVPLLLDLQVLEPGFIFEP  
PKNIQKMELRVMANLNWRLRSTTPFDYLDYFISKLPSCSSTKPENFDRVLKKSADLILNTTRVIDFLGFAPS  
TVAAAAVI SAAGKNFDTIPLKAGVGQFFHERVNREMVRSCHQLIEEYLIDTCPTARLKDLSDDALVDPASPA  
GVLDAACGSCSTRSENPI SASSQAPETEP I IKRLRSTATDVQEP\*

>Poptr;CYCD1;5 (AM746113)

MSVSADVSTPSVNYLCNETAGDALCSNNADGISEINSAYFPVDIDESYIDNIVSELHQMPETELIARFPDI  
PESGSAHQDTLWMLKVHAYCRFRPETAYLSANYFHCFILSHTLQKGGWPLQLLAVACL SVAAKLEETRVP  
SLLDIQTLEPRFLFKPSTVRRMELLVMGSLKWLHIITPFSFLHYFIAKLSHLSPRSKNLI LAHSSDLIIST  
CRVMNILAYTPSTIAAAAVLWVTDQSIGCPKLECFHNRMSKEMVRGCYNLIKQNTPQLSRGKALDATIPGKC  
LAKKCCSKDFKSSQDMSPSKC\*

>Poptr;CYCD2;1 (AM746114)

MAPSFDCAVSNLLCAEDNNSIFDDNDHYDATVEEFEATWHHGNHQICNQNGGGDGGCLPMQSDDECLVLMVEK  
ECQHLPNGDYLKRLRNGDLDMGARKEAVDWIAKAGSFFFLFFFTIVHAHFGFGPLCAYLSINYLDRFLSAYE  
LPNGKPWMMQLLAVACL SLAAKMEETE VPLSLDLQVGESRFVFEARTIQRMELLVLSTLSWRMQAITPFSFI  
DYFLSKINNDQTPPKSLILQSIHLILSTIRGIYFLEFRPSEIAAAVAIAVVGETKTVDQAEQAI SVLAQPVQ  
KERV LKCLQLIHDLSLFGG SVKGT SASLLSVPQSPIGVLDAACLSYSSNHTTVEPCANSSHNTPDAKRRKLD  
K\*

>Poptr;CYCD2;2 (AM746115)

MAPSFDCTVSSLLCAEDNNSIFDDNDCYDATVEEFEATWHHGNHQIQNQNSGWLPMQSEDECLVLMVEKECQ  
HLP SGDY LKRLRNGDLGLGARKEAVDWIAKVNAHF GFGPLCAYLSVNYLDRFLSAYELPKGNAMMMQLLGVA  
CLSLAAKMEETE VPLSLDLQVGESRFVFEARTIQRMELLVLSTLDWRMHAITPFSFIDYFLGKIINDQTPPR  
SLILQSIILLILSTIKGIYFMEFRPSEIAAAVSI AVVGETKTVDVEQAI SVLAQPVQKERV LKCFQLIHDLSL  
FGESXSSKGPSASLLSAPQSPIGVLDAACLSYNSDVGPCANSSHNTPDAKRRKPAKPC\*

>Poptr;CYCD3;1 (AM746116)

MASMYNPETSAVQDQQYQQNPTLLYDALYCSEENWVEEVREDCFQDELEGESYCSNNSKNLNTFPIIFLEQD  
LSWEDEELSSLFAKEEQNLCKDLETNPSLARARCEAVEWILKVNEHY SFTALTAVLAVNYLDRFLFSVHLQ  
KEKPWMAQLAAV SCLSLAAKVEETQVPLLLDFQVEDSKYVFEAKTIQRMELLVLSTLKWKMNPVTPISFLDY  
ITRRLGLEHYLCLEFLKRCERMVLSILADSRMPYVPSVMAAATMLYVIDNIEPSLAAEYQSQLLSILGIDK  
DKVEDCSKFLMEFALRYHFKLLSNKRKFCSLPGSPSGVVDVFS SSSDSSNDSWSVASSVSSSPKPLSKKSRA  
QSLNNATTSDFSQHSSLVP\*

>Poptr;CYCD3;2 (AM746117)

QYQQNPTFLYDGLYCSEENWEKEVREDFYQDEVKGEYFYSIDSNKRNTFPVVFVQQDLSWEEELSSLFAKEE  
QNQLYKILEINPSLARARCEAVEWILKVNVDHYSFSAVTAVLAVNYLDRFLLSVHLEKDKPWMAQLAAVACL  
LAAKVEETQVPLLLDFQVEDSKYVFEAKTIQRMEILVSTLKWKMNPITPISFLDYIIRRLGLKDYLCLEFL  
KRCERIVLSVVPKGLSMLYVPSVMATAVMLYIIDGVEPSLAAEYQSLLGILGIDKDMVEDCSKLVME LAPR  
DHFKFSSKRKYSSIPGSPNGVIDVSFSSDSSNYSWSVSVSSSPEPLSKKTR\*

>Poptr;CYCD3;3 (AM746118)

ELNSQQEQNASFLLDALYCEEGRWEDESEEEVLQESTFVNDLFPLSLLEQDLFWEDEELLSLFSKEQEQQAS  
VSVNNVADDPFLSRARQEAVEWMLKVIAHYGFSALTSILAFNYLDRFLSGPCYQRDSRPWMIQLVAVTCLSL  
AAKVEETHVPFLLDLQVEDTKYVFEAKTIQRMELLVSTLKWKMHPVTPLSFLDHIIRRLGLKTHVHWEFLR  
RCEHLLLSVVS DSRVSYLPSVLATATMMHVIDQVETFNPIDYQNQLLDV LKITKEKVNCGYGLILELSRNR  
TIANNKSQKRKFEPMPSSPSGVIGAVFSSDSSNDSWAVQGSVSSSPEPLFKKSR TQDK\*

>Poptr;CYCD3;4 (AM746119)

MAIPKQQELGQNELSTQQEQNTSFLLDALYCEEKWEDESEEEVLQESPSVNNPSGDLFSISLLEQDLFWED  
EELLSLFSKEQEQQASVSVNNVASDPFLSRARQEAVEWMLKVIAHHGFSALTSILAINYLDRFLVSPCYQRD  
NRSWMIQLVAVTCLSLAAKVEETHVPFLLDLQVEDTKYLFEAKTIQRMELLVSTLKWKMHPVTPLSFLDHI  
IRRLGLKTNVHWEFLRRCEHLLLYVVS DSRSGCYLPSVLATATMMHVIDQVETFNPIDYQTQLLDV LKITKE  
KVNGCYGLILELSRTRAIANNKPKRKFEP TPLQGSVSSSLETFLFKKGR TQDQWVFDIIGSPR\*

>Poptr;CYCD3;5 (AM746120)

MSFLQE QDTHRQSPALVLDGLYCEEFGEDYSCGFDDIIGDQNIKKEQTLSSVLLQDQDLFWEDNELL SLIS  
KEKETHVRFDDGGGSDGSLMVARREAVEWFLRVKAHYGFSALTGVAVNYFDRFISSSRFQRDKSWMGQLAA  
VACL SLAAKVEETHVPFLLDLQVEDAKYIFEAKTIKRMELLVSTLQWRMNPVTSISFFDHIIRRLGLKTHL  
HWEFLWR CERLLLSVIDSRSFMSYLP SILATVTMLHVIKEGDP RNQLEYQNQLMAVLKTNEDEVNECYKLI I  
EPGSGSQNRHKRKYLPSTPSSPNGVIDASFSSDISNNSWAVASSVSSSSV P QFKRSRAQVQOMRLPSLNCMCV  
DVLSSPR\*

>Poptr;CYCD3;6 (AM746121)

MSFFQQQETHNQSPALALDGLYCEEEDGFEDYSCSLDDETSQVYEQNVKKEQNLSPVLLLEQDLFWEDNELL S  
LISKEKETHVFDVSGSRDGLSMVVRREAVEWFLRVKAHYGFSALTGVAVNYFDRFISSSRFRDRKPMWGQ  
LAAVACL SLAAKVEETQVPLLLDLQVEDAKYVFEAKTIKRMELWVSTLHWRMNPVTSISFFDHIIRRLGLK  
THMHWEFLWR CERLLLSVIDSRSFMSYLP SILATATMLHVIKEVEPRNQLQYQTQLMAVLKTNEDEVNECYK  
LILEQQG SQNRHKRKYLPSTPSSPNGVIDATFSSDSSNDSWAVASSISSSSV P QFKRSRSHVQOMRLPSL N  
RMCVDVLSPPH\*

>Poptr;CYCD5;1 (AM746122)

MGDFDNSLSLSSLLCHENESCFFNDSISDHSNIKHDRSRFGLTEVDVEYVEKLVRETITFGYRCHASFDD  
CLITSHNWLK FARLDAIEWILNTRATYGRFHTAYLSVTYFDRFVSKRSIDEGKLWAI RLLSVACLSLAAKM  
EERKVPPLSEFPVEDYCFGNKVIQRMELLVNLTEWRMNSITPFAYLHYFIHKTCGESTPKETVSRAVELIV  
AMIKEIDLLDHRPSIIAAA AVLAASNRQLTRKELELKMDMISSWGSLENENVFSCYIAMQEIE MGKAKTPRL  
VFYPNSSA IHSGSFVDLENSSLVSGAGIKRSLTFNECDQTCPAKKICRP\*

>Poptr;CYCD5;2 (AM746123)

MADESLSPGDLFCYEDFLGELAVADEDDTYIDITR TYVGDPTDEEYL TLLANREPHQGFNANETLVLDASF  
RTARLEAITWILRTRKNFGFHFHTAYLSMIYFDRFLSSRFIDRNYTRVVS LISVGCISLAAKMEEV RVP SLP  
QLQTEGVT FSTNVERVELGILSTLQWRMNYATPFAFLRYFIKFSRQDSPPRET VSR TVQSILALMREIHL  
MSHRPSVIAAAATLVV LNNSLTRTTLETQMNSIAYPGFLNIVSD\*

>Poptr;CYCD5;3 (AM746124)

MAGESLSPNDLLRQEDFRAELVADEDDTYIDISRTYVGDPTDEEEY LALLANQEPHRGFSANDTLVIDSW  
FRNARLEAITWILRTRKTFGFHFHTAYLSMIYFDRFISSRSIDRRYSWVVKLISVACISLASKMEEVQVPSS  
PEFQTDGVI FESKSVKRVELGILSTLQWRMNYTTPFAFLRYFIMRFSRQDSPPRETISR TVRYILALMKEIH  
LMSHRPSVIAAAASLVV INNSLTRTTLETQMNSVAYPGFLNIEDVFCYNLLQQLDVENLRSTANGLPLKAR  
PALFLFEALLAVFKFERGHETQDIVYGNQKEFLCLIIIL\*

>Poptr;CYCD6;1 (AM746125)

MKLDLENPLTSSEEHQSDTITYLFASEFDHMPSRNLNLFLETCDHFYVSRHEAISLILQAQYSCNCGPFI  
YLAVNFMDFRISRMEIPQGKPWILRLVVVSLSLAAKMENTDFSI SNFQGEAGFIFDNKTINRMELLILD  
LDWRMRSITPFSFVHFFISLSQLKDPALTQTLKDRATEIIFKAQNEIKLLKFKPSIIAASALLVASKELLPL  
QFPSFKFSISAFECVKEFNVGVRASLRAPRLIPWALKLTTM\*

>Poptr;CYCD6;2 (AM746126)

MEFDLENPLTSLEEHQSDTVPNLFASESDHMPSRNLHCLKTSGFYVSRQEASISLILQAQYSCNYDAFIPY  
LAVNYMDFRISKQEIPOGKPWILRLVVISCLSLAAKMKNHFSVSDFQGEAGFIFDTQTINRMELLILDAL  
NWRMRSITPFSFVHFFISVLELKDPSQQPLKDRATEIIFKAQNEIKFLEFKPSIVAASALLVASNELLPLQ  
FPLFKCSISSCAFVNKEKLLSCFNAVQEMVEMEWYESMLDTMSCTRTPLSVLDQRCTKSESETTSTTSINNG  
STVPEIKRRRLNGHSSK\*

>Poptr;CYCD6;3 (AM746127)

MEFDLENPLTSLKEYVSDTIPDLFVSESDHMPSRNLHCLKTSDFYVSRFREEAISRLILQAQYSCNYDLFIPY  
LAVNYMDFRISRQEIPOGKPWILRLLVISCLSLAAKMKNKHFSISNSQAEAGFIFDTQTINRMELLVLDAL  
NWRMRSITPFSFVHFFVSLFELKDPSQQPLKDRATEIIFKAQNEIKFLEFKPSIIAASALLVASNERFPLQ  
FPCFKCSIYSCEFVNEEKLLCEFNALQEMVEMEWYESMLDTMSWTRTPLSVLDHRHFTKSENETTSIITSTTT  
ITNGSTVPEIKRRKLNYSYGK\*

>Poptr;CYCD6;4 (AM746128)

MDFNLENPLTNSHELHFDTPPSLFLIESDHMPSKNYLKTLKEIDFDVSRREAISSVLRVSCNFDPSLSYLA  
VNYLDRFLSSQGIPQPKPWVFKLLAVACVSLAAKMEAEFYVTDIQGDGGVFVDPQTIQKMEVLIILGALNWR  
MRSITPFSFISFFISLFPKDPPLRQALKARACEIIFKAQNDINLLEFRPSLTAASALLYACHELFPMQFLC  
FRKAISICSYVNKENLLQCYNAMQETAMDGYKSQFDMVSSSDTPVNVLDHRHFSSESENTNGTVVMISSNGS  
NKTWPEKGIKRRKISALCANNQTVQFSAFSDATTMLM\*

>Poptr;CYCD6;5 (AM746129)

MDFNLENPLANSDFHFDTPSDLFLIESDHMPSNNYLNTLKEMDFDGSRREAISSVLRVSCNFDPSLSYL  
AVNYLDRLLSSQGIPQPKPWLFRLLAVACVSLAAKMEAEFCISDTQARXDGGVFVDTQTIQKMEVLIILGAL  
NWRMRSITPFSFISFFISLFPKDPPLRQALKARASEIIFKAQNDINLLEFKPSLIAASALLYASHELFPMQ  
FLCFRKAISNCSHVNKENLLQCYNAMQEIAMDGYRSQFDMVSSSDTPVNVLDQHFSSSESEKT\*

>Poptr;CYCD7;1 (AM746130)

MDSLLCDEVWLSPPATPDHNNQPRYSHGENYAAASSFYTTKEDCEKAVSIYLEKEFTCMPEPGYVEHLRTKN  
LLFARLRAIQWLIKSRERLSLSFETVFNAANYLDRFMSMNQCHGWKCMVVELLCVACLVSASKFTETRTPCL  
HDIQMEDLDHSFQPITIQRMELVLLRALGWRLGSTTAYSVELLMMEIDFLKSYSYLQKDLVACRITELLG  
AMQDCSMVGFRRPSITAIASALWCSLEEFVPSKSDAHLAHIKGLLNALDHKDDVVIKCHGIMEAQLINPVYNLL  
ACGKKHSYCCPSSPVTPLPTERIGIYDCDVLDFNDSGSNKQETSCKKRKWHEKSIKDDGFQKRIK\*
