# Supplementary material
Source: PubMed Central journal article supplement (PMC2151690)
Supplement: plntphys_pp.107.104901_2.pdf [file plntphys_pp.107.104901_2.pdf]

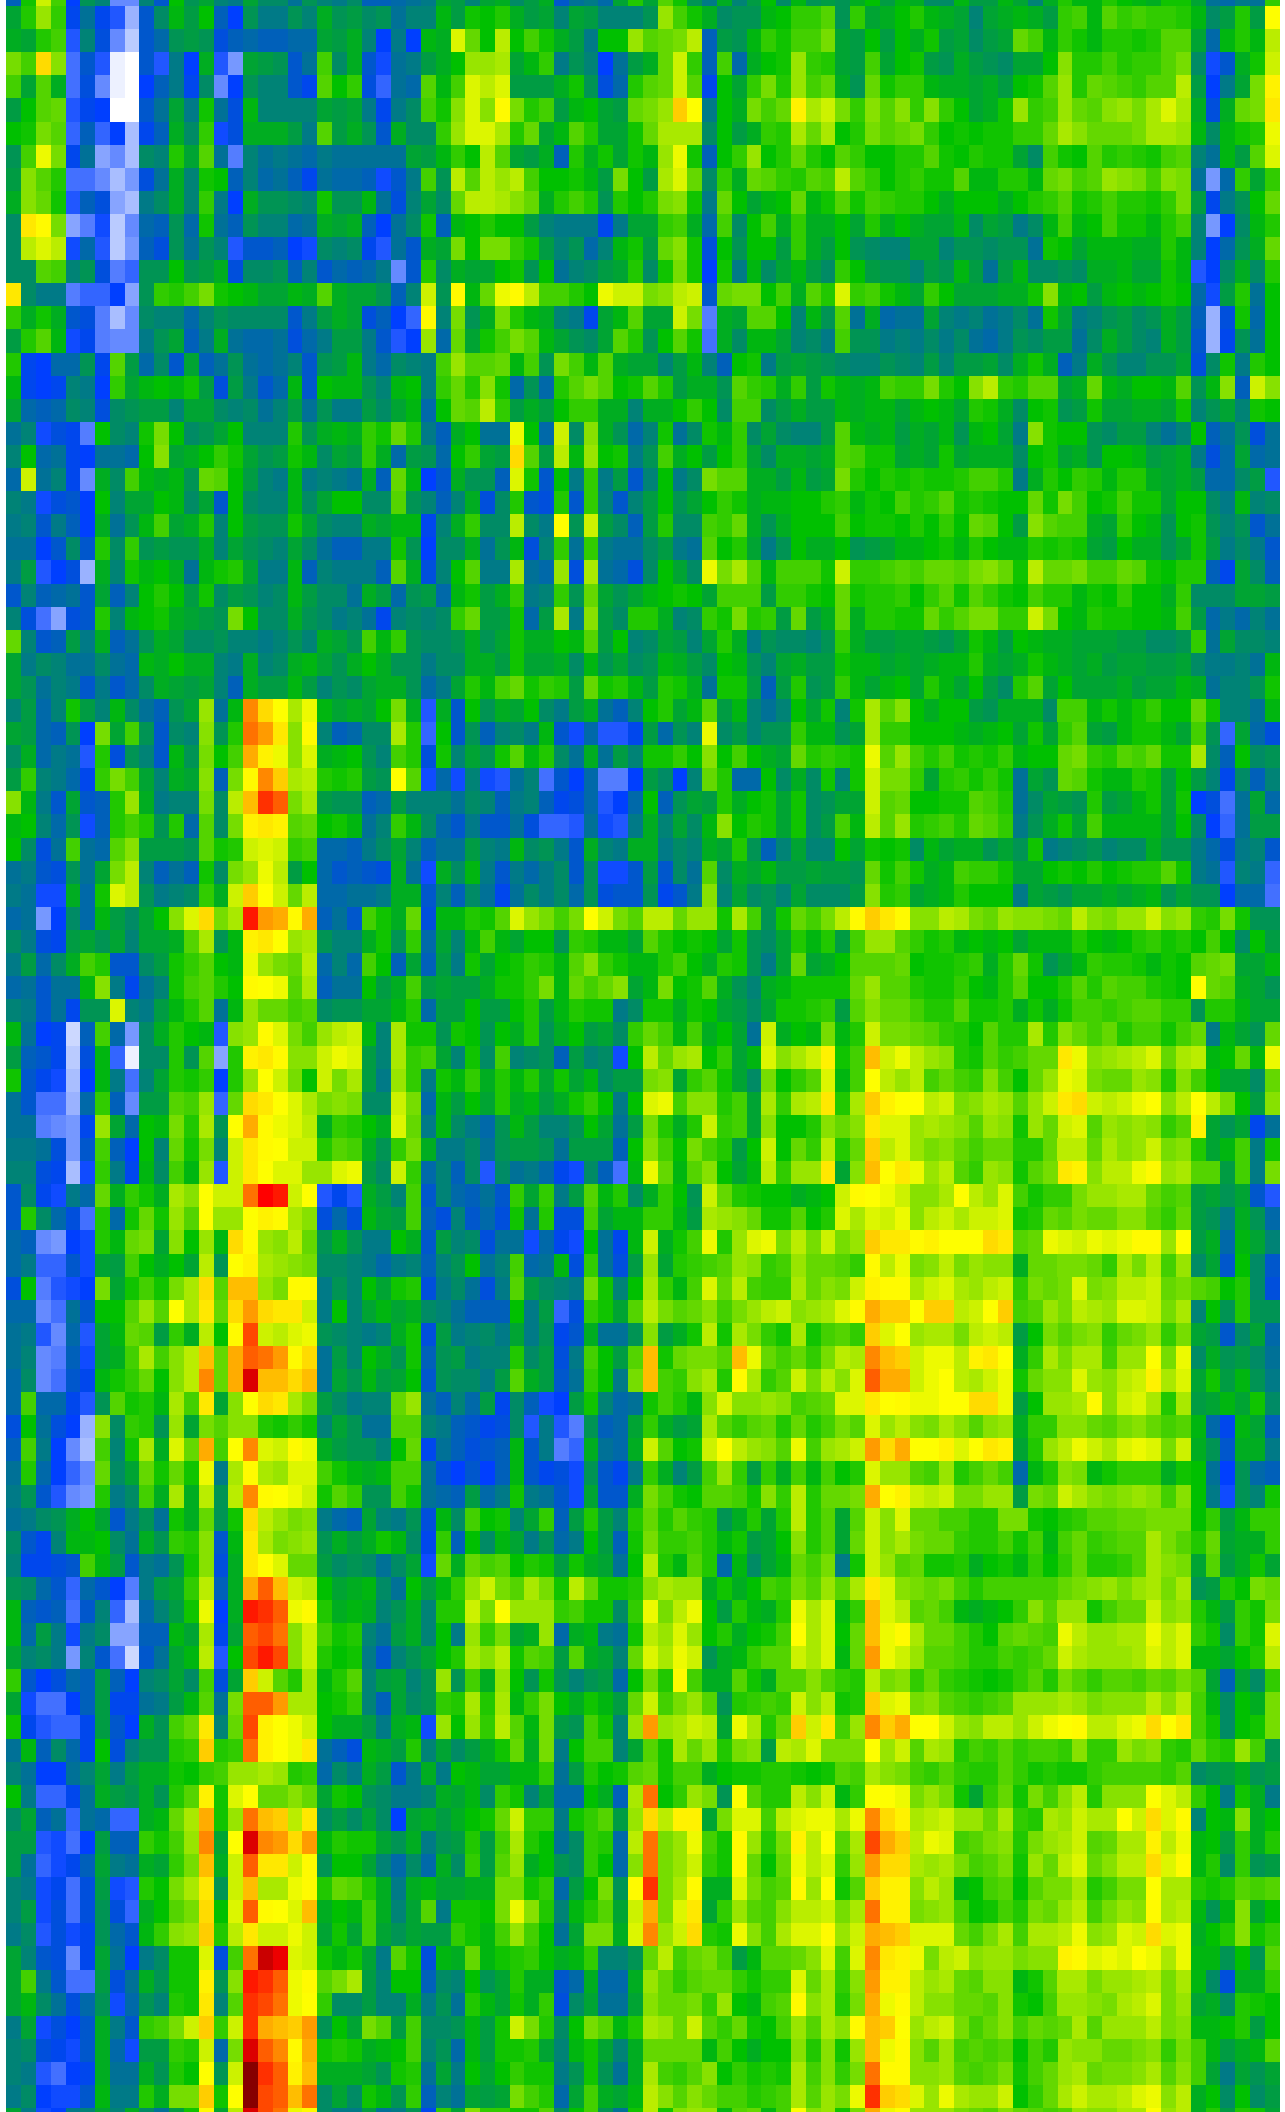

At5g03610  
At5g46750  
At4g39820  
At5g07350  
At5g16310  
At3g26680  
At1g18480  
At2g46520  
At1g01260  
At5g61780  
At5g65270  
At1g77510  
At3g55620  
At5g55070  
At3g08640  
At1g24340  
At5g53900  
At2g30480  
At4g31590  
At3g28155  
At2g33570  
At5g15740  
At1g66460  
At1g01900  
At4g36360  
At3g54320  
At2g29980  
At3g53400  
At5g14860  
At3g14720  
At1g10650  
At3g18040  
At5g52560  
At4g03110  
At5g51460  
At2g47490  
At5g15950  
At5g56780  
At1g75180  
At5g04110  
At4g26330  
At3g60580  
At2g02400  
At3g15620  
At3g17090  
At4g31340  
At1g52250  
At1g12310  
At3g11210  
At1g56590  
At1g78300  
At3g03090  
At5g64640  
At2g15280  
At5g40610  
At1g26570  
At4g31400  
At1g33170  
At3g22760  
At4g35950  
At5g13100  
At3g61130  
At5g04160  
At1g21070  
At1g14020  
At5g64600  
At2g14110  
At3g24315  
At4g31010  
At2g17370  
At5g60550  
At3g12600  
At2g25530  
At1g15490  
At1g05360  
At5g18550  
At5g56310  
At2g47010  
At5g08565  
At5g62500  
At1g18180  
At3g20560  
At5g15070  
At3g13420  
At1g03457  
At1g04160  
At2g28080  
At2g33240  
At3g61590  
At4g23490  
At1g04760

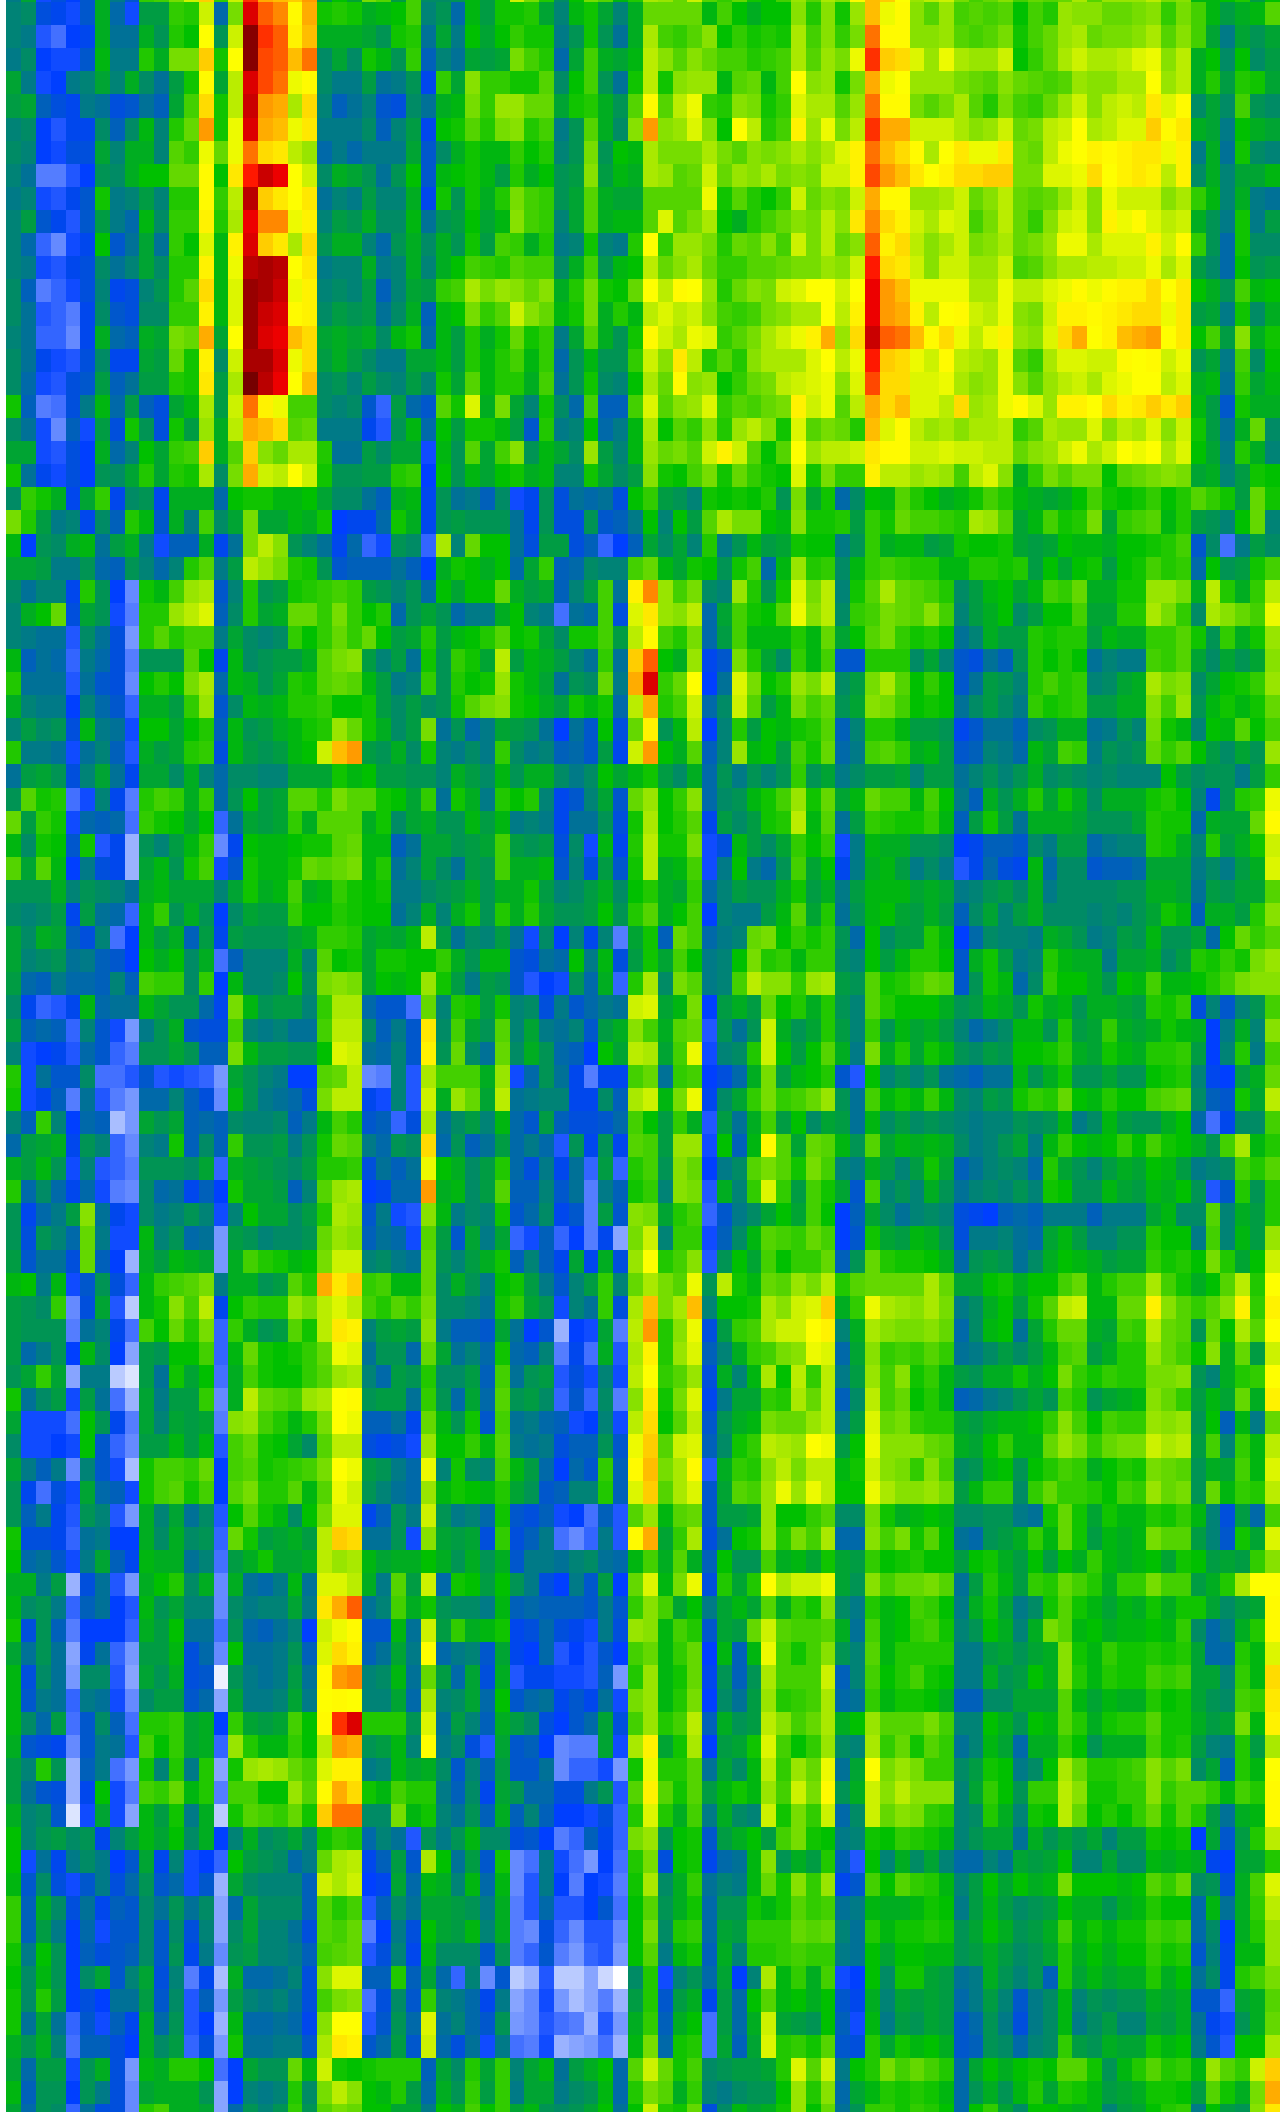

At3g61590  
At4g23490  
At1g04760  
At3g46200  
At5g09790  
At2g17800  
At5g49150  
At3g04630  
At4g28680  
At3g12470  
At3g54930  
At4g27370  
At1g63640  
At2g25880  
At4g32830  
At1g26840  
At4g30860  
At4g26100  
At5g64030  
At1g19970  
At2g34920  
At4g17890  
At3g17120  
At5g51880  
At3g08580  
At2g37975  
At3g05230  
At3g49830  
At3g07130  
At5g57980  
At3g01070  
At3g57160  
At2g45750  
At5g49790  
At2g24640  
At4g04700  
At1g75270  
At4g22070  
At5g29050  
At2g30660  
At3g44340  
At1g35320  
At3g30160  
At2g31490  
At4g05390  
At5g37510  
At3g02090  
At1g79550  
At1g21750  
At2g44610  
At3g54110  
At1g51980  
At3g47833  
At1g15120  
At2g47390  
At4g25160  
At2g04650  
At3g17780  
At4g00860  
At5g08160  
At3g09810  
At4g30010  
At3g52730  
At2g40765  
At1g51650  
At1g80230  
At3g13930  
At5g20820  
At2g34300  
At3g18170  
At5g56950  
At5g41670  
At4g33360  
At1g24280  
At3g54870  
At3g27240  
At2g32380  
At2g24170  
At5g39320  
At3g04120  
At5g49810  
At4g24620  
At3g04120  
At3g04120  
At3g04120  
At2g44060  
At3g04120  
At1g09780  
At2g26360  
At5g07130  
At4g55040

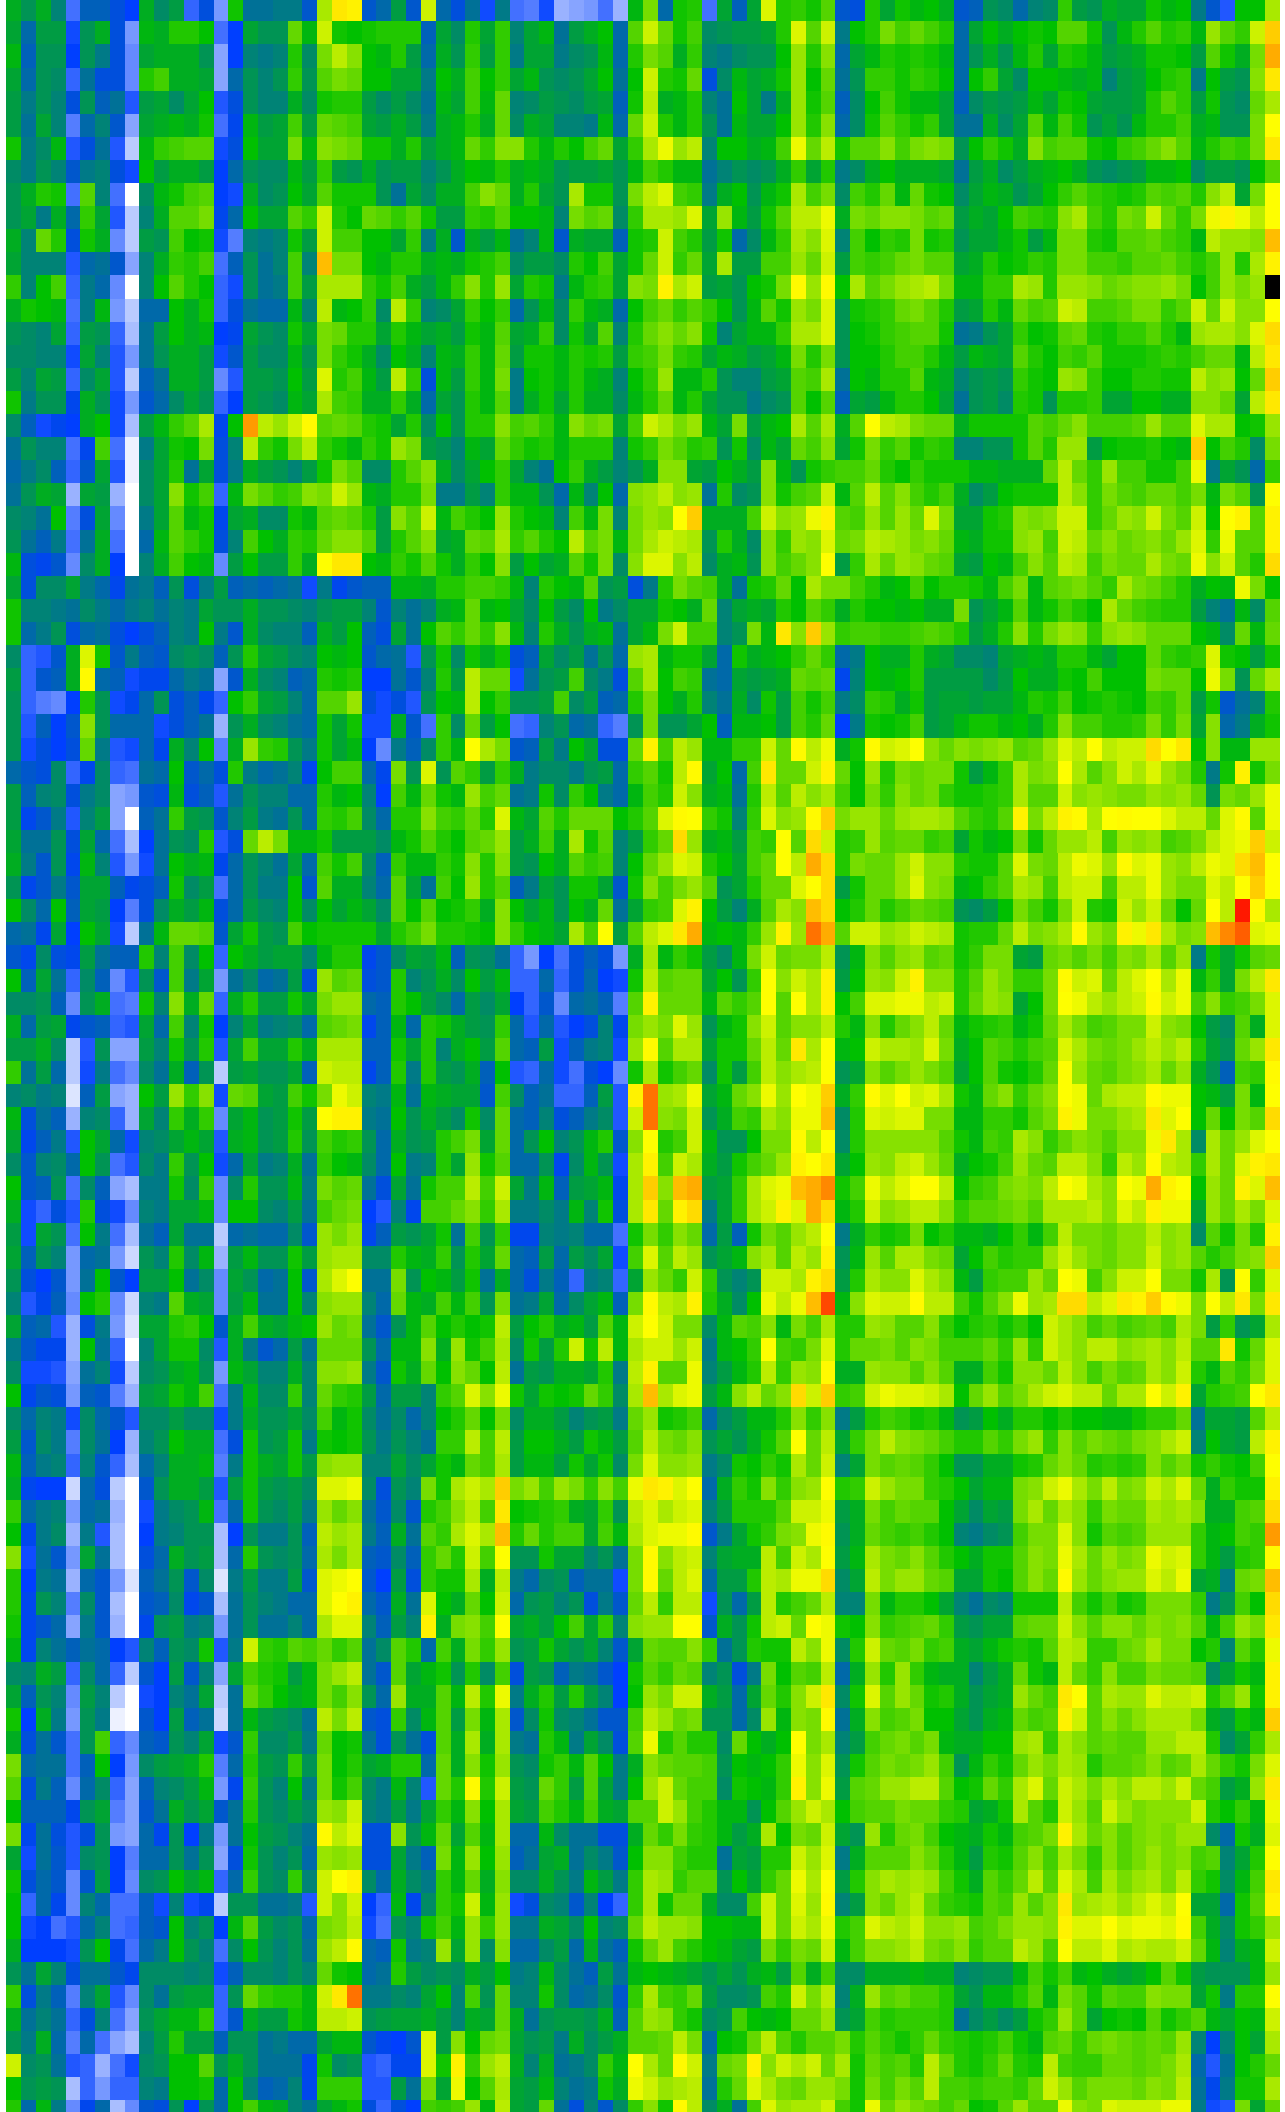

At1g09780  
At2g26360  
At5g07130  
At1g55940  
At5g55590  
At1g66950  
At3g54270  
At3g30260  
At1g07020  
At3g02980  
At5g56610  
At4g33160  
At3g05050  
At5g11800  
At2g35150  
At1g80730  
At4g32780  
At2g41300  
At2g45990  
At3g53520  
At3g11200  
At1g09330  
At3g17900  
At3g43300  
At1g56080  
At2g46060  
At3g03290  
At4g15475  
At3g62790  
At5g47890  
At1g76200  
At5g03345  
At2g24765  
At4g00740  
At2g45540  
At2g43070  
At2g39700  
At5g24310  
At5g16720  
At5g18690  
At1g51160  
At1g61790  
At3g59760  
At1g10630  
At2g16460  
At3g05420  
At3g52930  
At1g30630  
At4g27270  
At1g28410  
At1g19715  
At1g76260  
At5g18800  
At5g38630  
At5g35730  
At2g02130  
At2g47320  
At3g15640  
At5g55940  
At1g11680  
At5g53090  
At5g40320  
At4g16230  
At1g07290  
At2g35120  
At1g78050  
At2g27510  
At1g05620  
At1g74030  
At3g52200  
At2g01140  
At3g27470  
At5g59160  
At3g59920  
At1g22300  
At1g16060  
At5g42280  
At1g26450  
At1g61930  
At1g64440  
At1g74055  
At4g00460  
At4g25870  
At2g40800  
At5g34940  
At5g54700  
At4g30560  
At5g11230  
At4g34200  
At4g37910  
At4g32400  
At1g76140

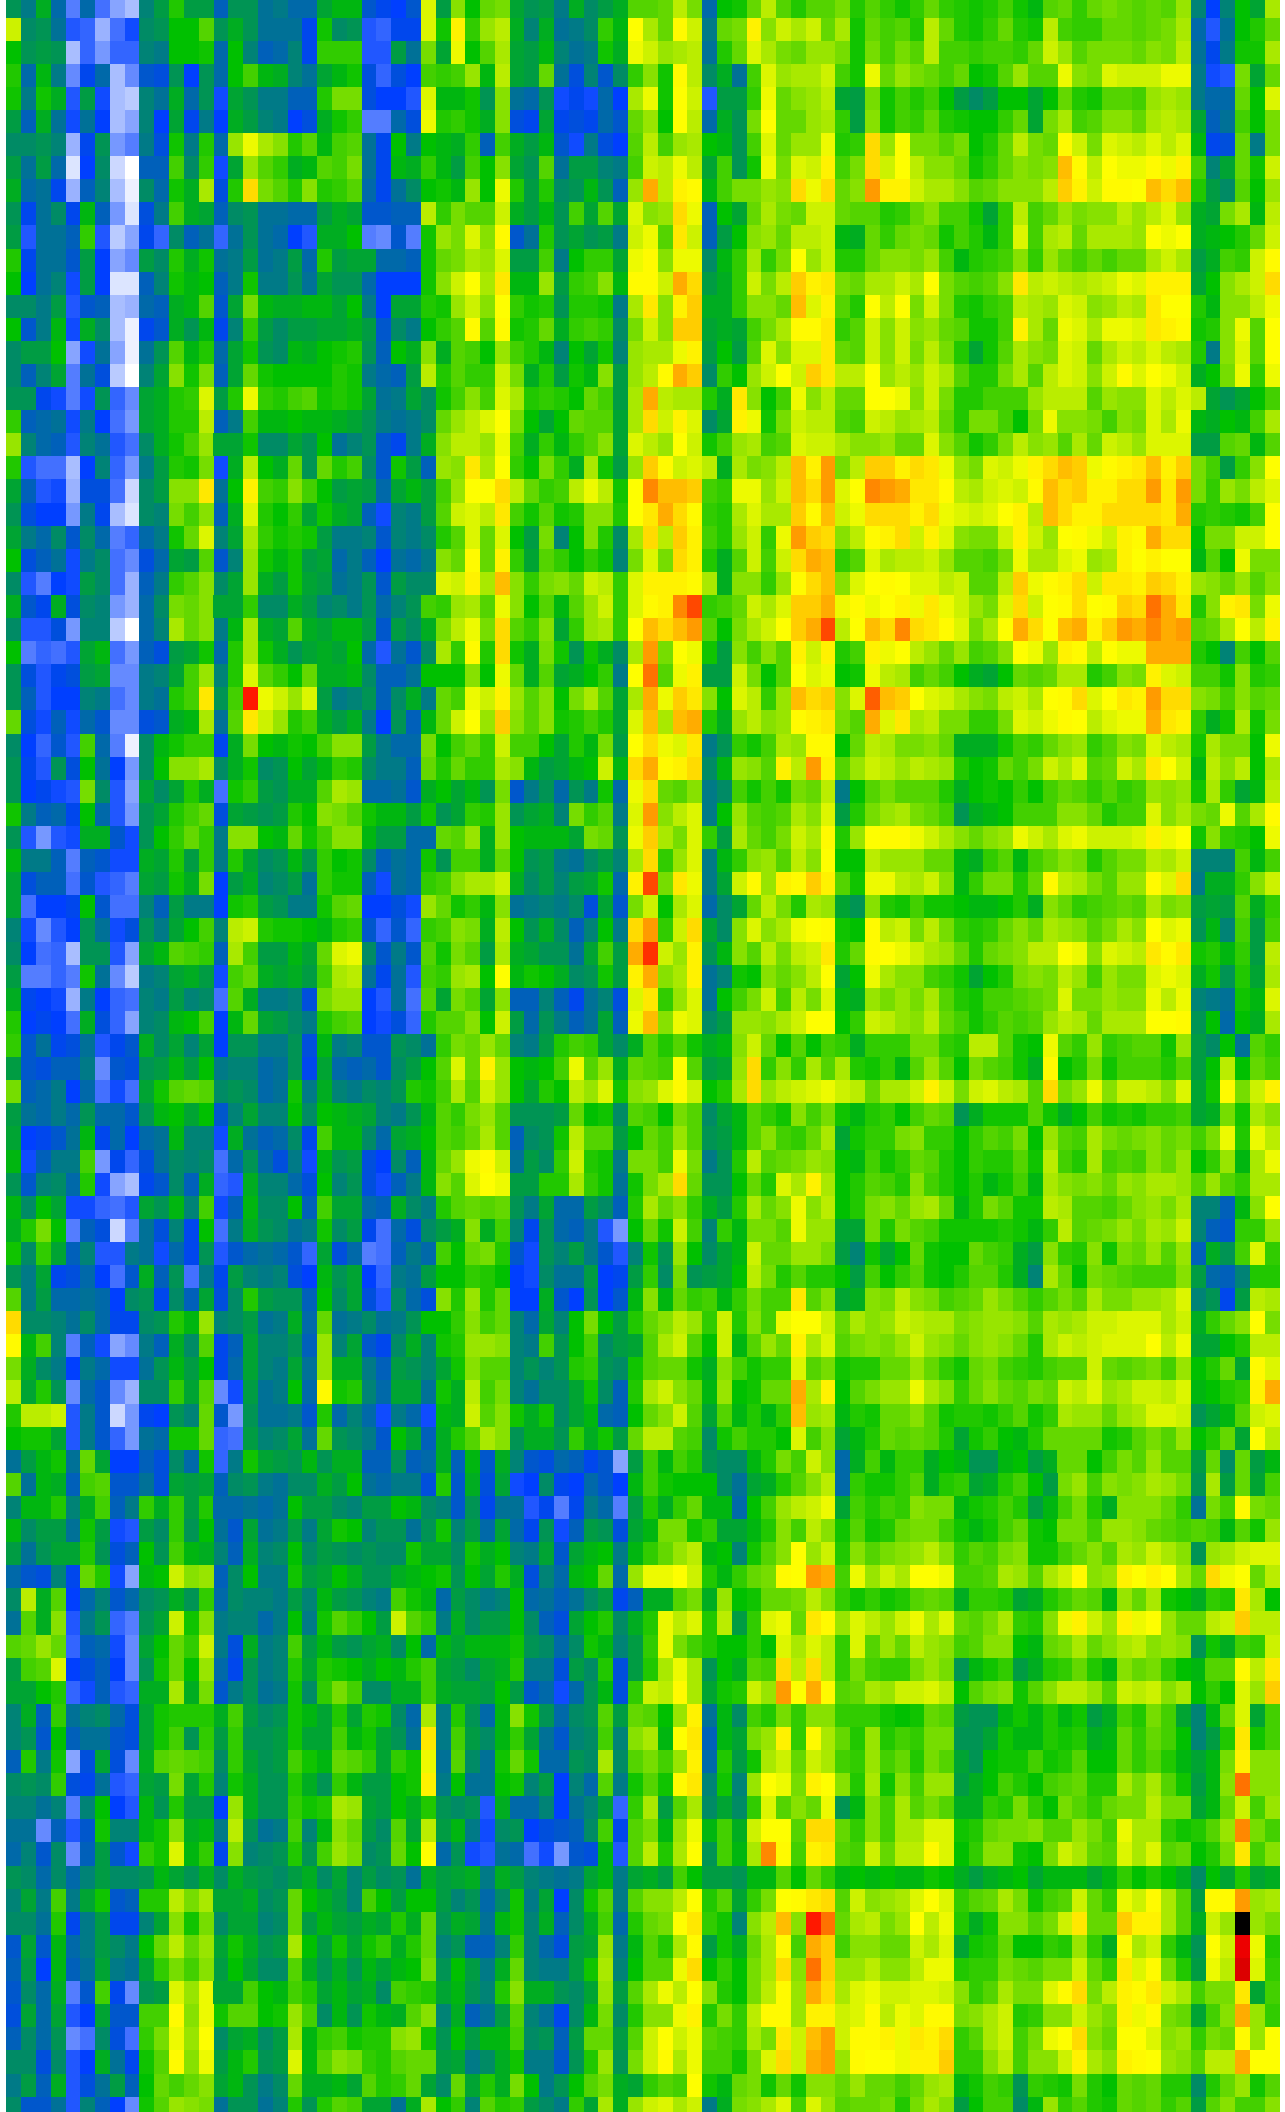

At4g34200  
At4g37910  
At4g32400  
At1g76140  
At5g08300  
At2g20420  
At1g60780  
At4g04910  
At5g16510  
At5g40580  
At2g18040  
At1g67490  
At1g71220  
At1g62020  
At5g51430  
At2g21390  
At2g03120  
At2g38060  
At3g05570  
At1g24090  
At3g50960  
At5g59740  
At1g04340  
At1g49040  
At1g20480  
At3g59390  
At2g15860  
At5g63840  
At3g06580  
At3g17940  
At5g15460  
At5g08110  
At2g20820  
At1g68680  
At4g00585  
At5g24390  
At1g12530  
At1g67780  
At1g23410  
At1g47420  
At3g46430  
At1g05205  
At1g08480  
At2g36530  
At1g22840  
At5g28920  
At5g27990  
At4g01860  
At2g18060  
At3g03040  
At1g64490  
At1g63290  
At4g22320  
At1g05350  
At1g52260  
At5g45420  
At1g71696  
At4g39570  
At4g17260  
At3g06020  
At5g41180  
At1g04200  
At1g76340  
At1g62820  
At3g57870  
At3g62370  
At1g55210  
At5g47250  
At2g22425  
At3g53620  
At1g68760  
At4g21865  
At5g24760  
At2g22250  
At4g14180  
At5g18810  
At1g51540  
At2g01970  
At1g31790  
At2g46930  
At1g64090  
At2g19510  
At3g16700  
At5g11300  
At3g42725  
At2g44690  
At2g21600  
At2g44660  
At3g55060  
At5g20540  
At2g17900  
At1g48200

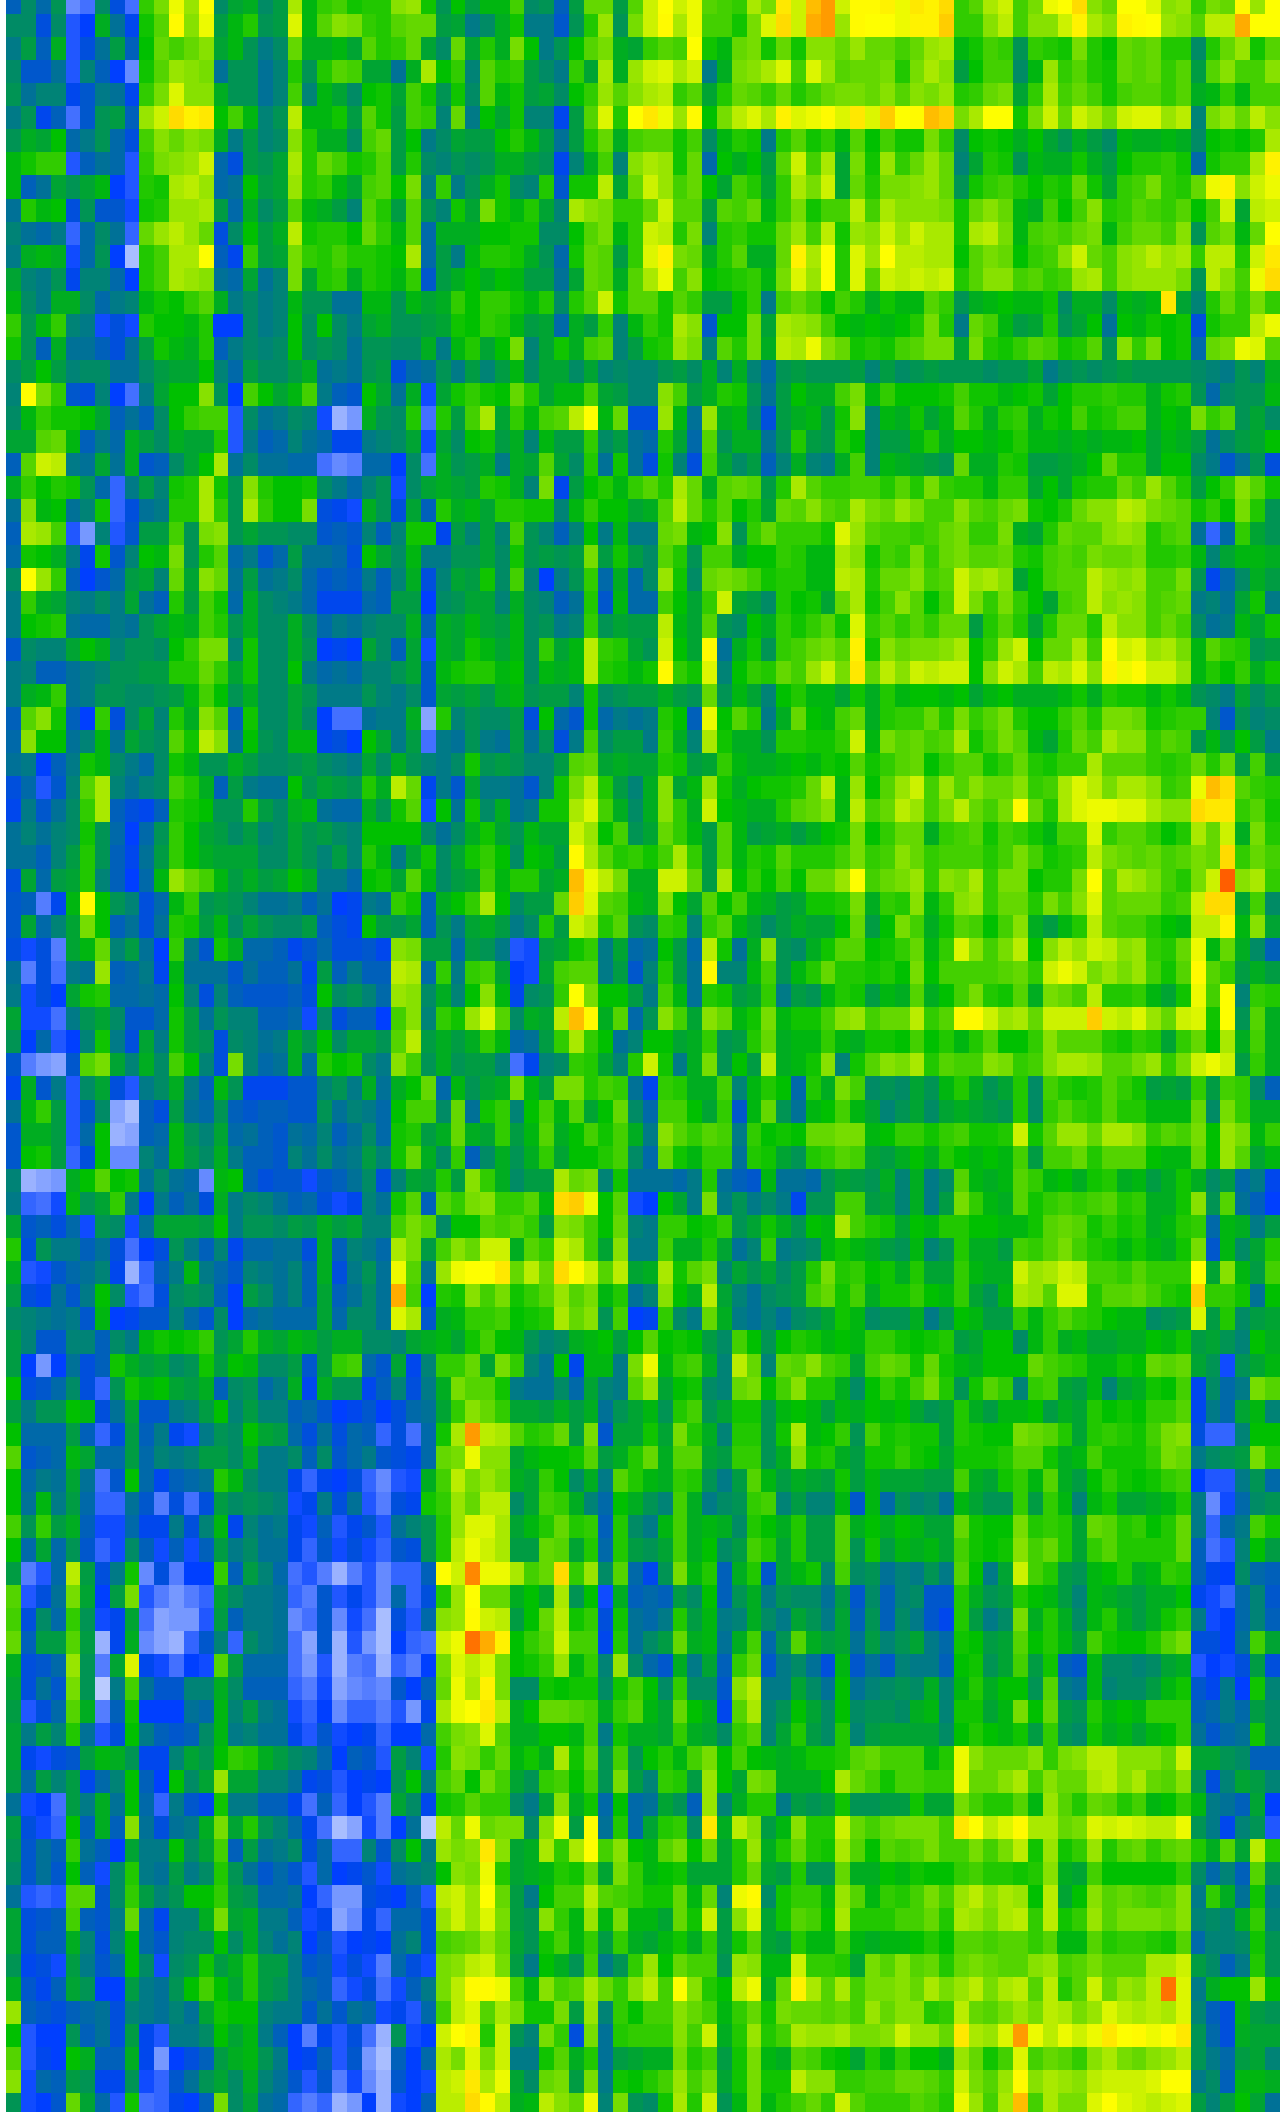

At3g95060  
At5g20540  
At2g17900  
At1g48200  
At5g57450  
At4g34360  
At2g34130  
At1g03980  
At1g57600  
At4g13330  
At1g25460  
At5g18070  
At5g65230  
At5g66130  
At4g22950  
At1g68470  
At1g76470  
At1g75450  
At3g18930  
At5g42140  
At2g28930  
At5g51050  
At1g69370  
At4g03550  
At2g30120  
At5g55120  
At3g19270  
At1g37140  
At3g53310  
At3g17010  
At5g41890  
At1g78210  
At1g74440  
At3g02500  
At2g35470  
At4g34215  
At3g30340  
At5g66350  
At3g04510  
At3g57320  
At1g78490  
At5g49980  
At1g27190  
At3g13360  
At3g62980  
At1g63110  
At2g24290  
At1g32050  
At5g09810  
At5g09810  
At5g09810  
At1g09000  
At3g61600  
At3g05850  
At1g08680  
At1g08680  
At4g31140  
At3g49880  
At1g64830  
At5g15910  
At1g35550  
At2g07674  
At1g80810  
At2g42370  
At4g08210  
At3g19750  
At2g46020  
At3g12810  
At5g20300  
At5g23680  
At1g74120  
At1g55460  
At1g55930  
At1g06530  
At2g16860  
At5g50990  
At1g55300  
At2g28530  
At1g29790  
At2g36490  
At4g38110  
At1g03560  
At4g18593  
At4g24900  
At5g65820  
At1g12620  
At4g35740  
At1g12770  
At2g29080  
At5g64470  
At5g16790  
At4g26630

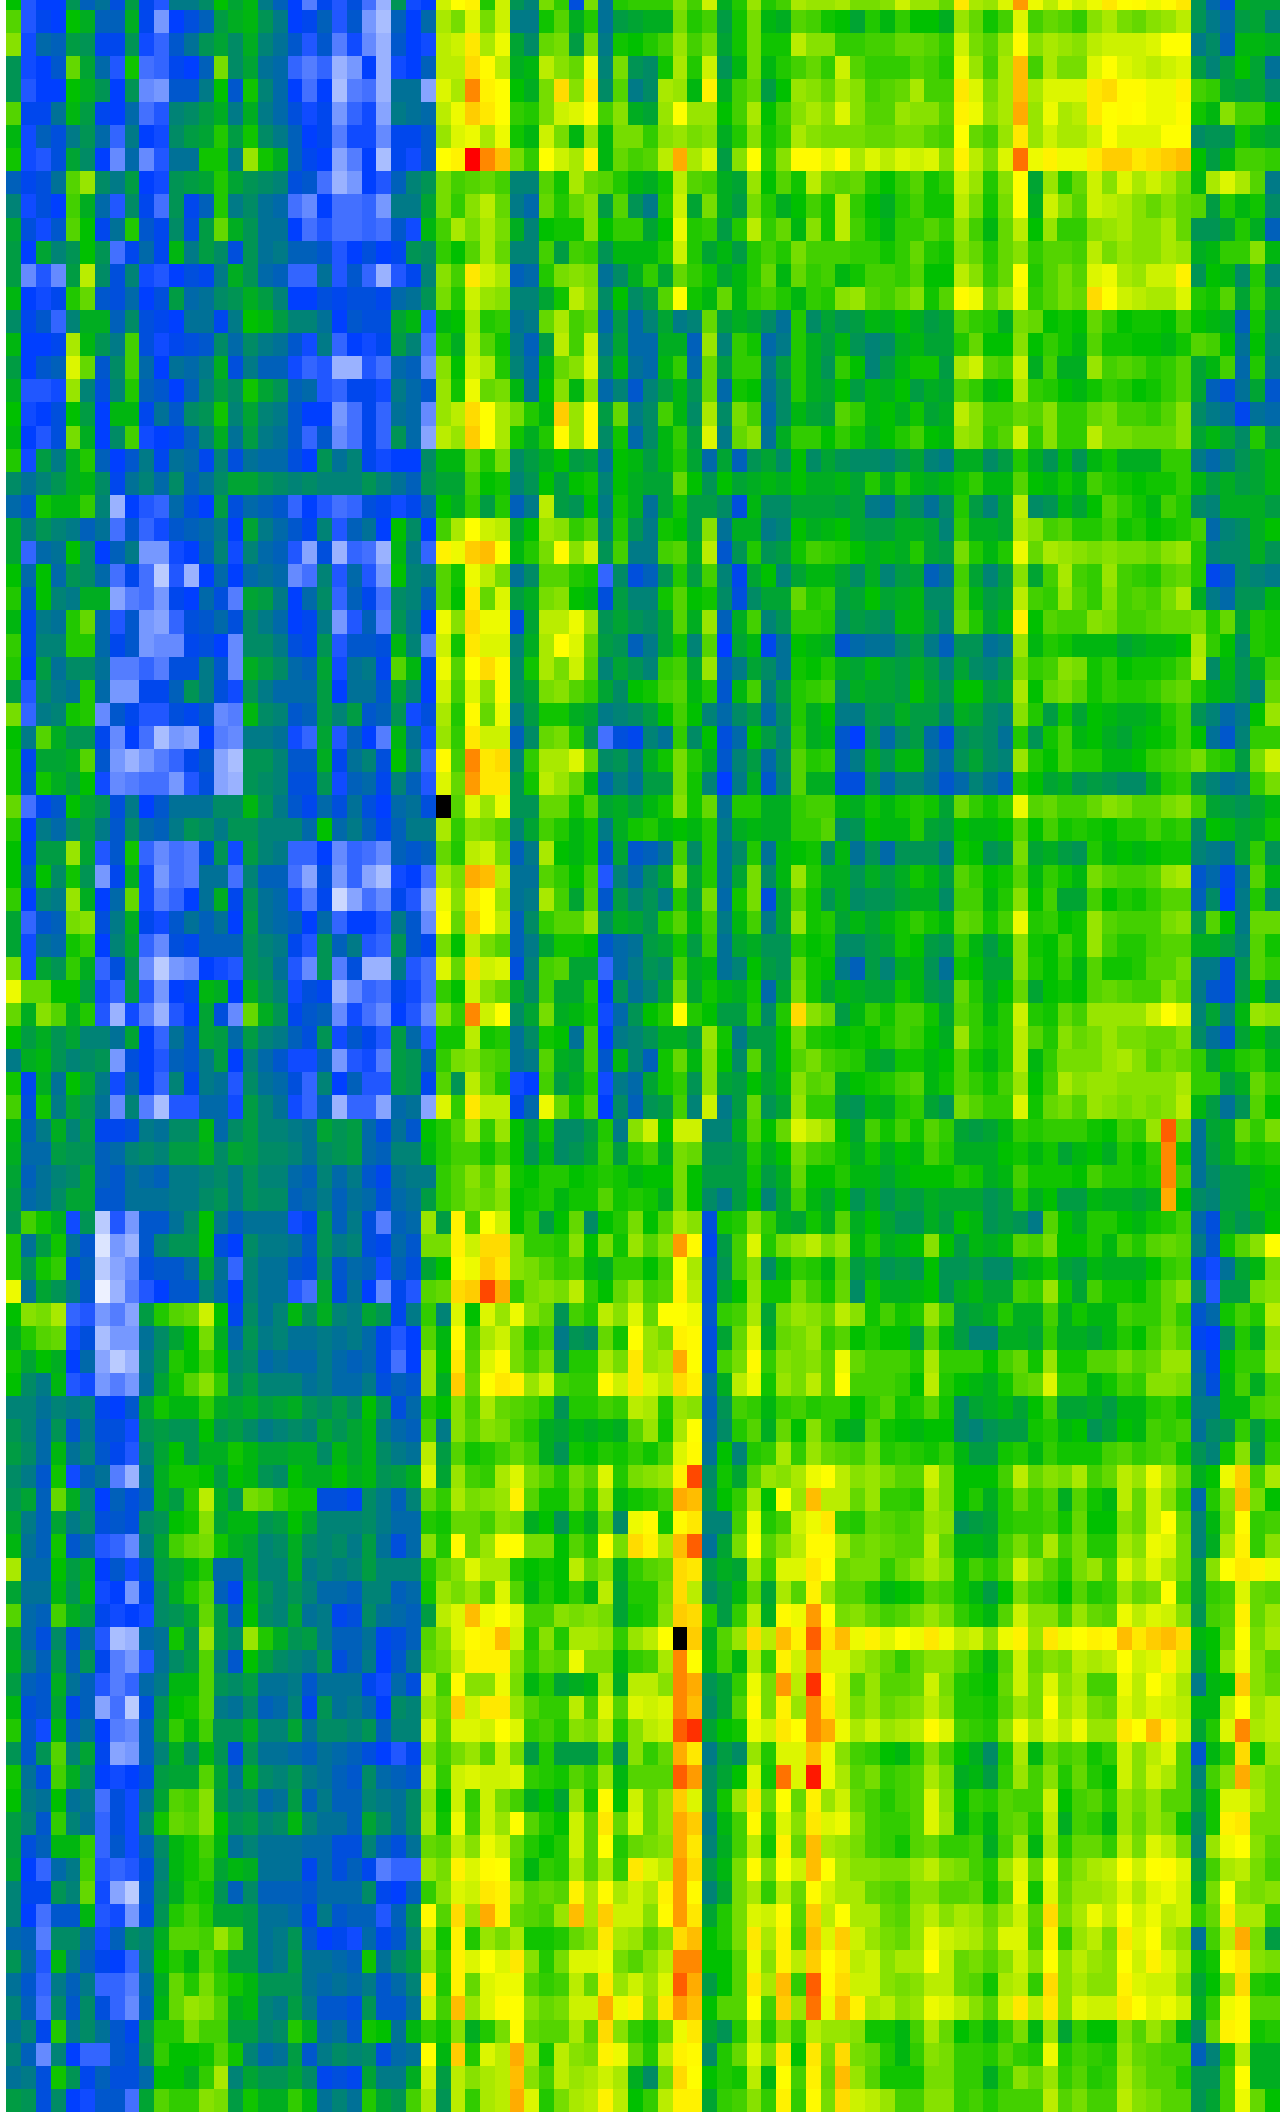

At2g39800  
At5g64470  
At5g16790  
At4g26630  
At3g09980  
At2g45880  
At2g32630  
At1g79350  
At3g62970  
At5g50340  
At3g51780  
At2g25300  
At2g35320  
At3g04520  
At3g12120  
At5g03140  
At5g62610  
At4g34040  
At4g38980  
At1g71340  
At3g26430  
At1g01700  
At1g04690  
At5g08130  
At3g54190  
At5g47790  
At5g16560  
At1g27520  
At4g12460  
At3g45240  
At1g61150  
At2g34660  
At2g11240  
At2g25590  
At3g47675  
At5g48640  
At5g10530  
At2g27950  
At5g37380  
At1g66950  
At5g06265  
At4g36470  
At5g49470  
At5g52410  
At3g29075  
At1g55270  
At5g09810  
At5g40140  
At5g24620  
At4g19130  
At4g02390  
At5g48720  
At5g03780  
At1g72750  
At5g38830  
At1g62740  
At1g76810  
At5g09420  
At5g42150  
At3g08950  
At1g69250  
At2g23040  
At1g33500  
At4g35520  
At1g50500  
At2g03280  
At1g36180  
At2g23890  
At3g53540  
At2g23150  
At5g19480  
At1g47870  
At1g59660  
At1g45000  
At5g44320  
At2g02560  
At2g03510  
At1g44910  
At2g44820  
At5g25800  
At2g26970  
At5g16060  
At4g30480  
At1g51730  
At2g03780  
At1g50620  
At2g45280  
At2g45520  
At1g50510  
At5g25080  
At1g36990  
At1g51450

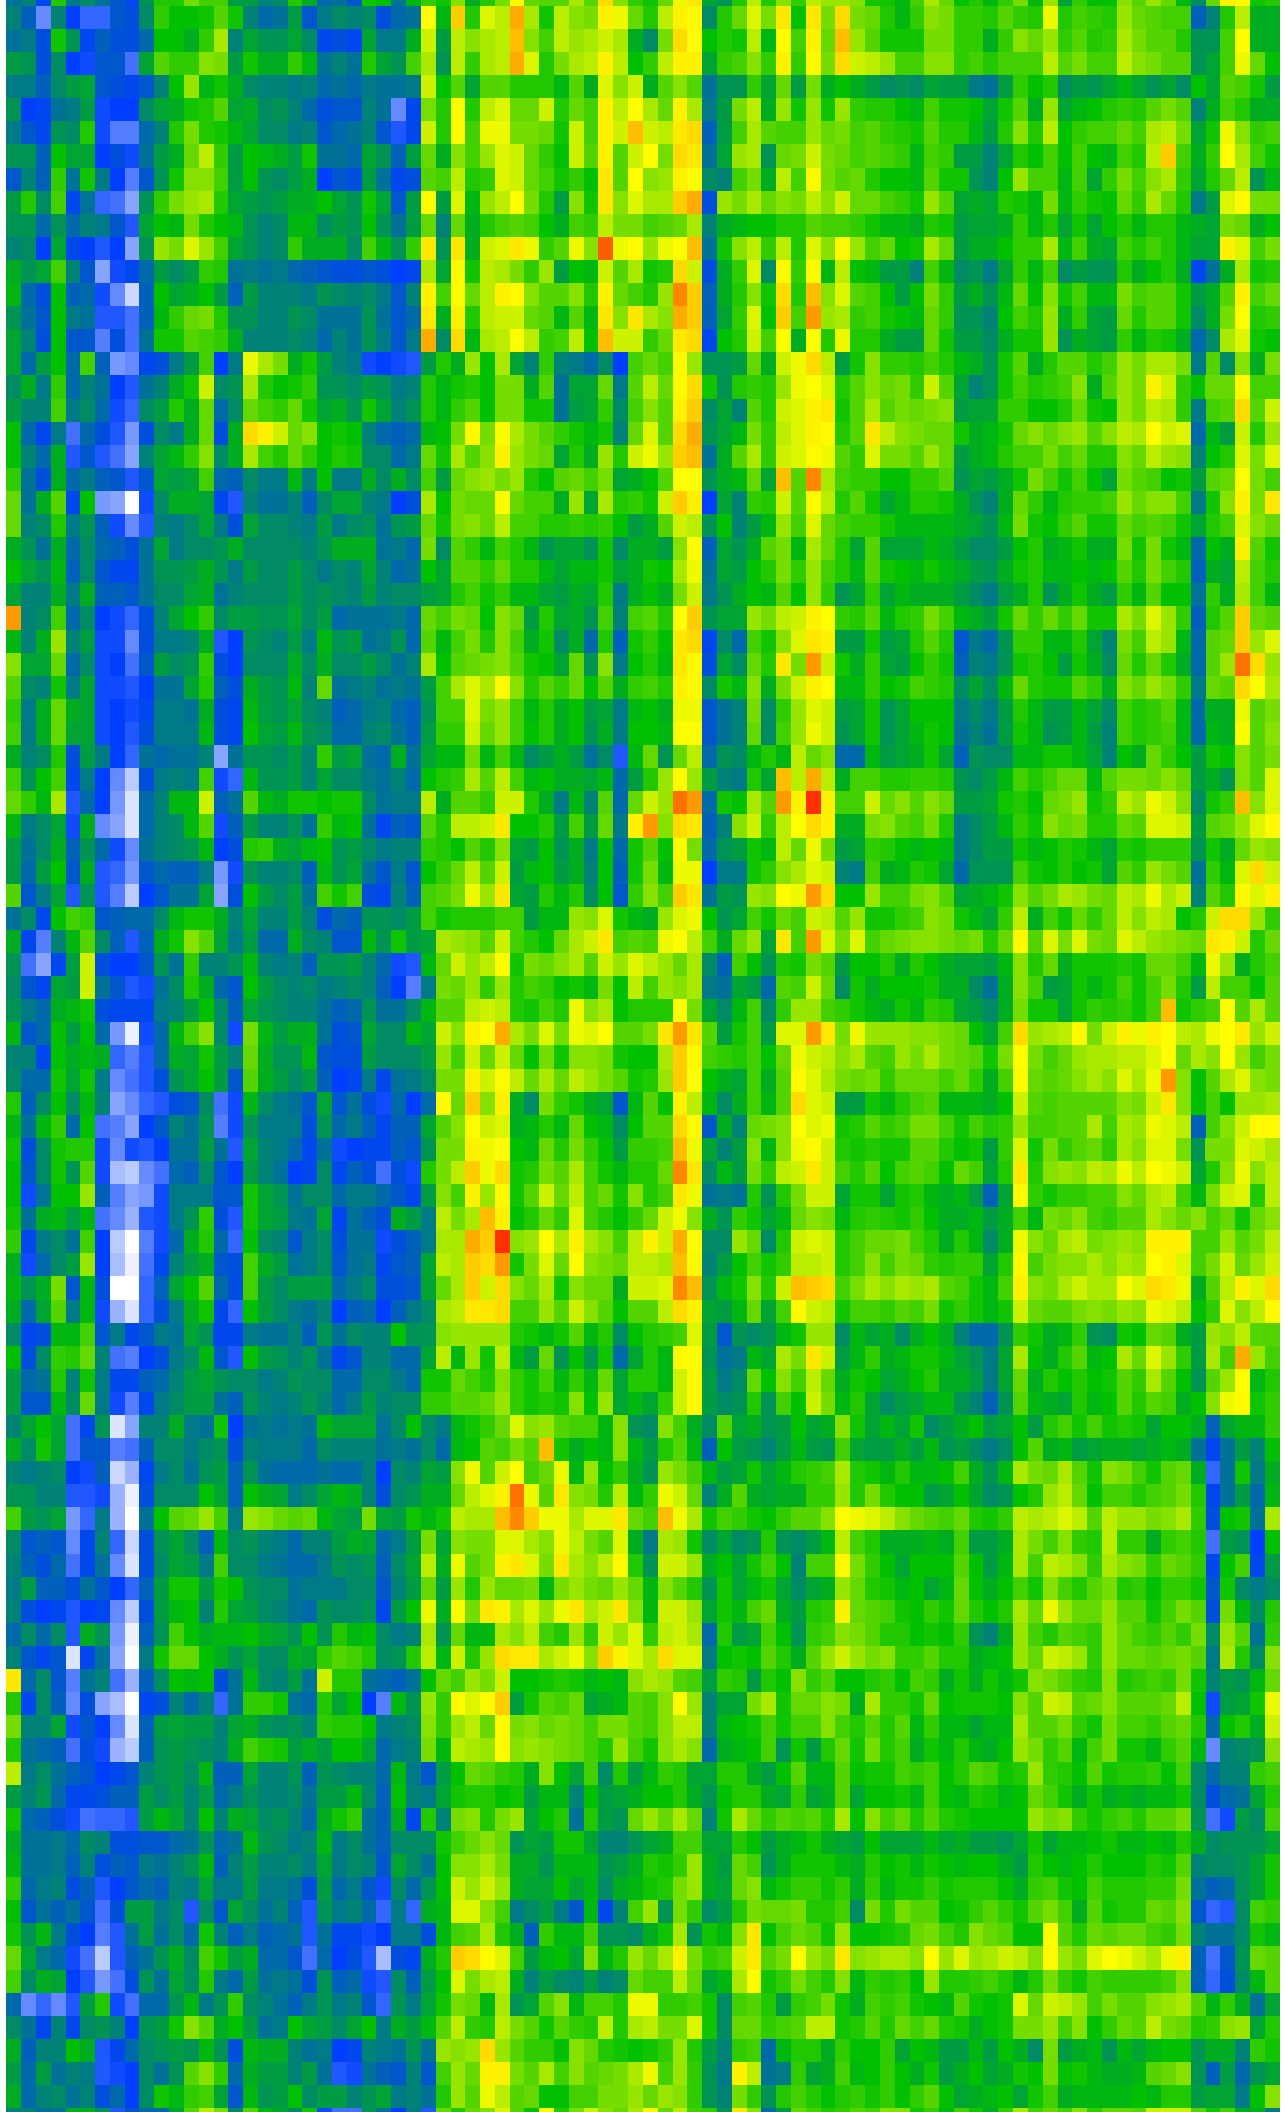

At5g25080  
At1g36990  
At1g51450  
At3g15720  
At5g06420  
At4g26310  
At5g60250  
At5g50870  
At2g37890  
At5g17150  
At5g20200  
At1g43860  
At1g51710  
At1g51380  
At2g03820  
At2g45070  
At2g17280  
At2g02350  
At4g08590  
At3g16320  
At5g57100  
At5g19440  
At5g18610  
At2g07682  
At2g07682  
At2g03880  
At3g22930  
At2g47260  
At4g03230  
At2g14650  
At3g31970  
At1g58160  
At5g46590  
At2g22475  
At3g04230  
At1g23210  
At2g19990  
At5g10850  
At3g22550  
At2g28060  
At5g64350  
At1g15270  
At5g24280  
At1g44750  
At3g48770  
At2g46180  
At5g50330  
At1g10990  
At1g50700  
At2g44420  
At2g23080  
At3g50860  
At3g19640  
At4g10050  
At4g02030  
At5g35080  
At2g17390  
At1g50940  
At2g04340  
At4g02980  
At5g66420  
At1g47710  
At5g13400  
At5g16760  
At1g54170  
At3g13672  
At5g38470  
At3g06640  
At3g07660  
At5g61760  
At3g02420  
At5g09980  
At5g57870  
At5g62600  
At3g14400  
At2g34850  
At5g17040  
At2g25620  
At3g16050  
At3g12050  
At3g25230  
At5g60030  
At1g61730  
At5g57990  
At5g56030  
At1g35620  
At1g32370  
At4g32240  
At4g19010  
At5g30490



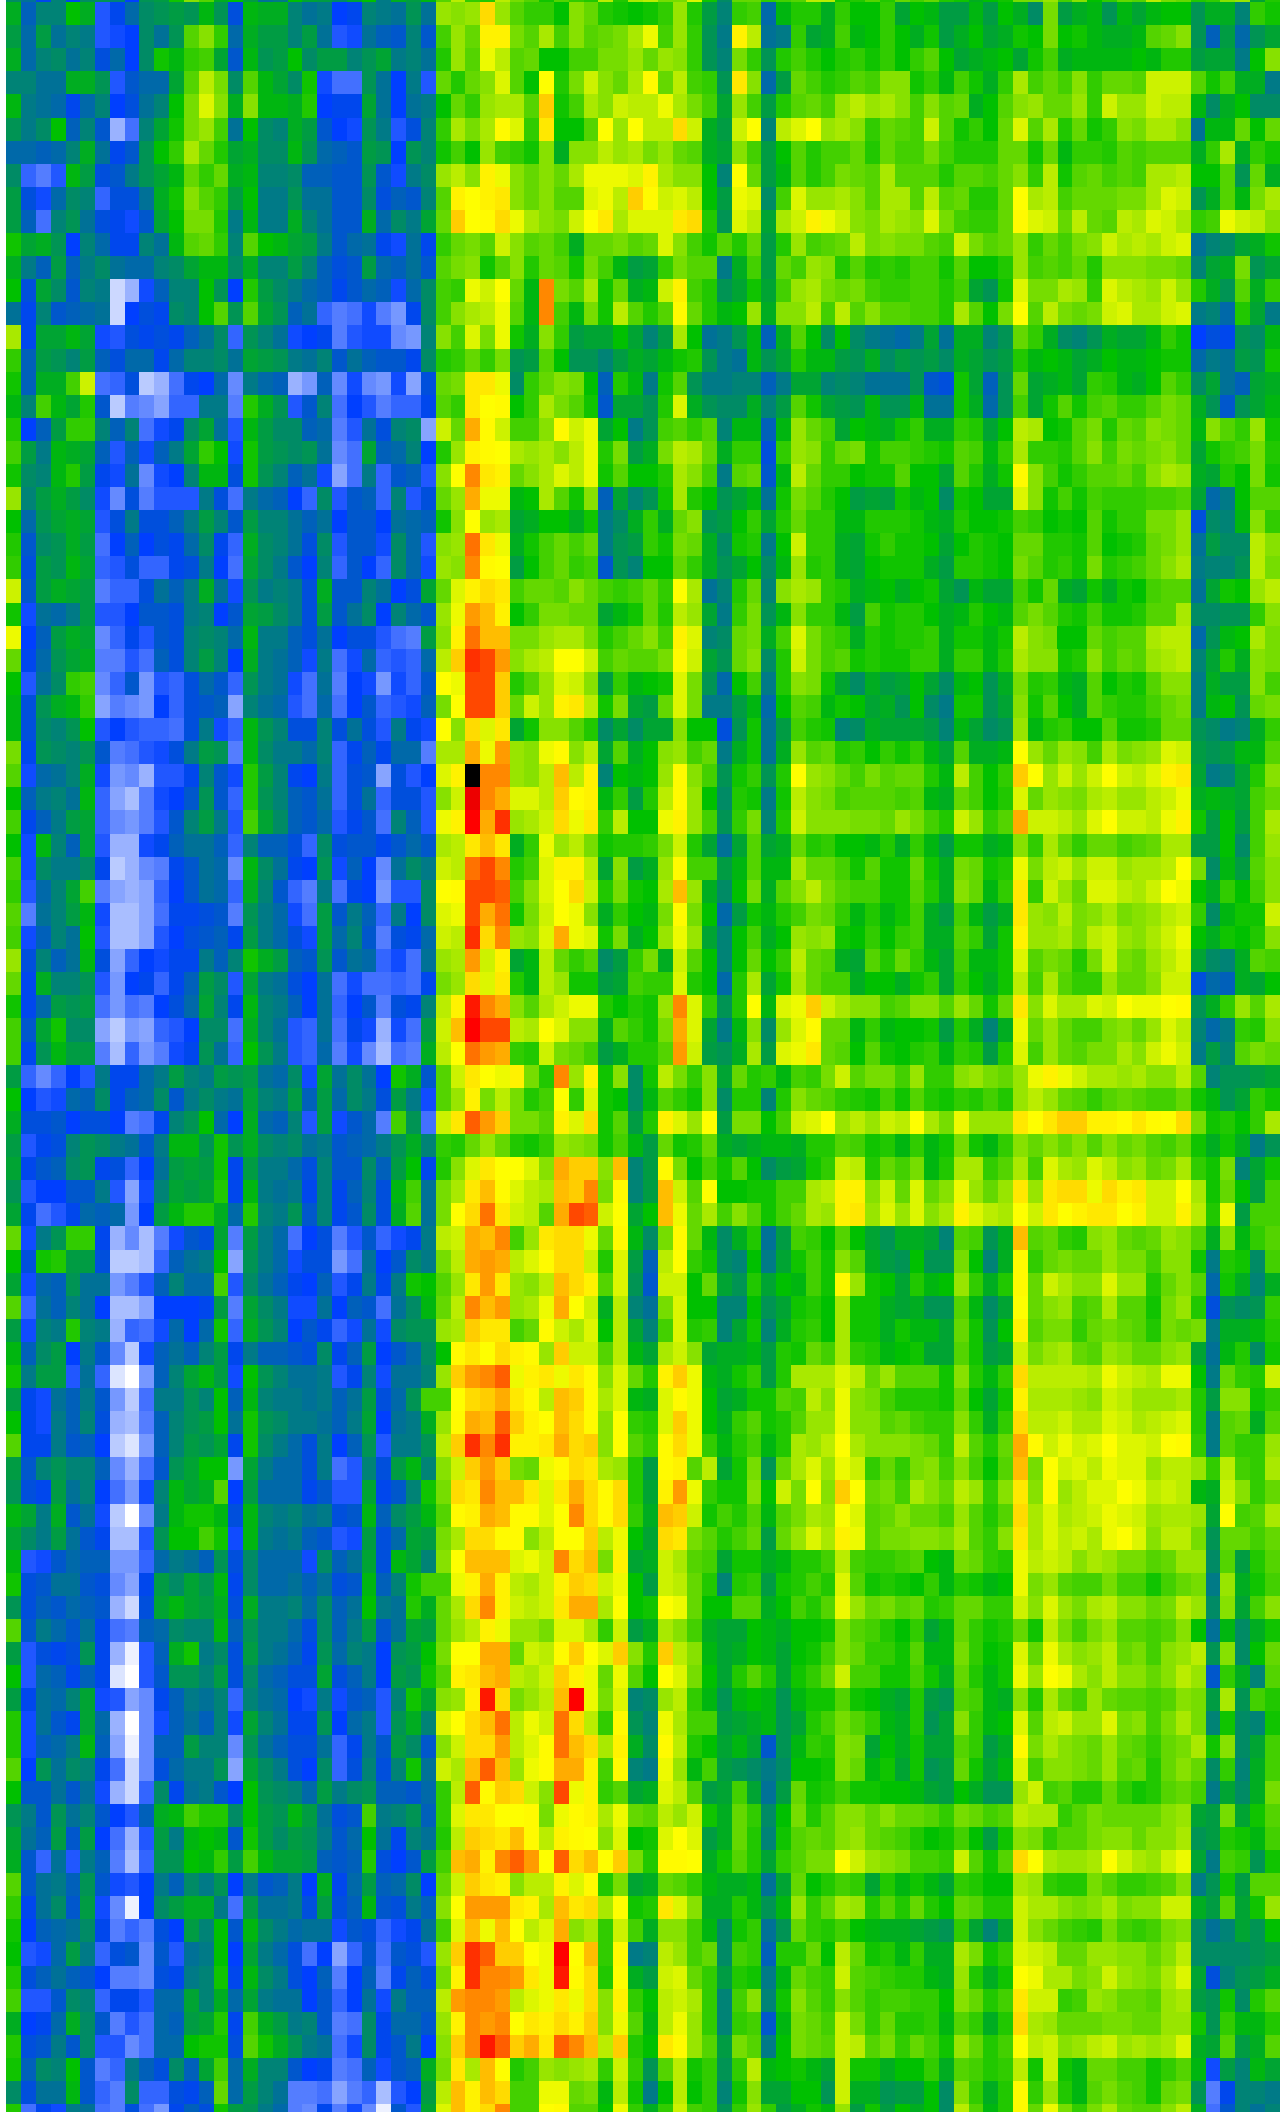

At4g32240  
At4g19010  
At5g30490  
At5g64560  
At2g21130  
At5g50840  
At3g21470  
At3g16230  
At5g27010  
At2g06210  
At1g02410  
At3g49400  
At3g58570  
At2g38670  
At5g39040  
At2g44880  
At1g29850  
At1g28490  
At5g09740  
At4g00760  
At5g09410  
At5g38560  
At2g07674  
At2g07751  
At5g18950  
At4g32460  
At3g09360  
At4g15030  
At2g01220  
At1g32630  
At1g80970  
At2g17700  
At5g45190  
At5g44080  
At3g15880  
At3g21175  
At3g27530  
At5g19960  
At1g54490  
At1g67500  
At5g49500  
At3g07610  
At5g25060  
At1g31870  
At1g48900  
At1g05150  
At1g61240  
At1g67230  
At4g26690  
At1g67340  
At1g48620  
At5g16505  
At2g04880  
At3g22170  
At1g43850  
At4g38600  
At5g22760  
At5g21010  
At3g43240  
At5g15680  
At5g06120  
At1g02080  
At5g65780  
At5g17690  
At2g36850  
At3g07160  
At4g38350  
At4g35800  
At5g24350  
At5g38040  
At3g20120  
At1g26110  
At5g19330  
At3g54480  
At1g08970  
At1g33980  
At1g04120  
At1g22310  
At2g07727  
At5g23610  
At1g22860  
At2g36670  
At5g01310  
At1g15340  
At5g04240  
At4g15090  
At5g08450  
At3g12140  
At5g17510  
At3g56860  
At2g21130

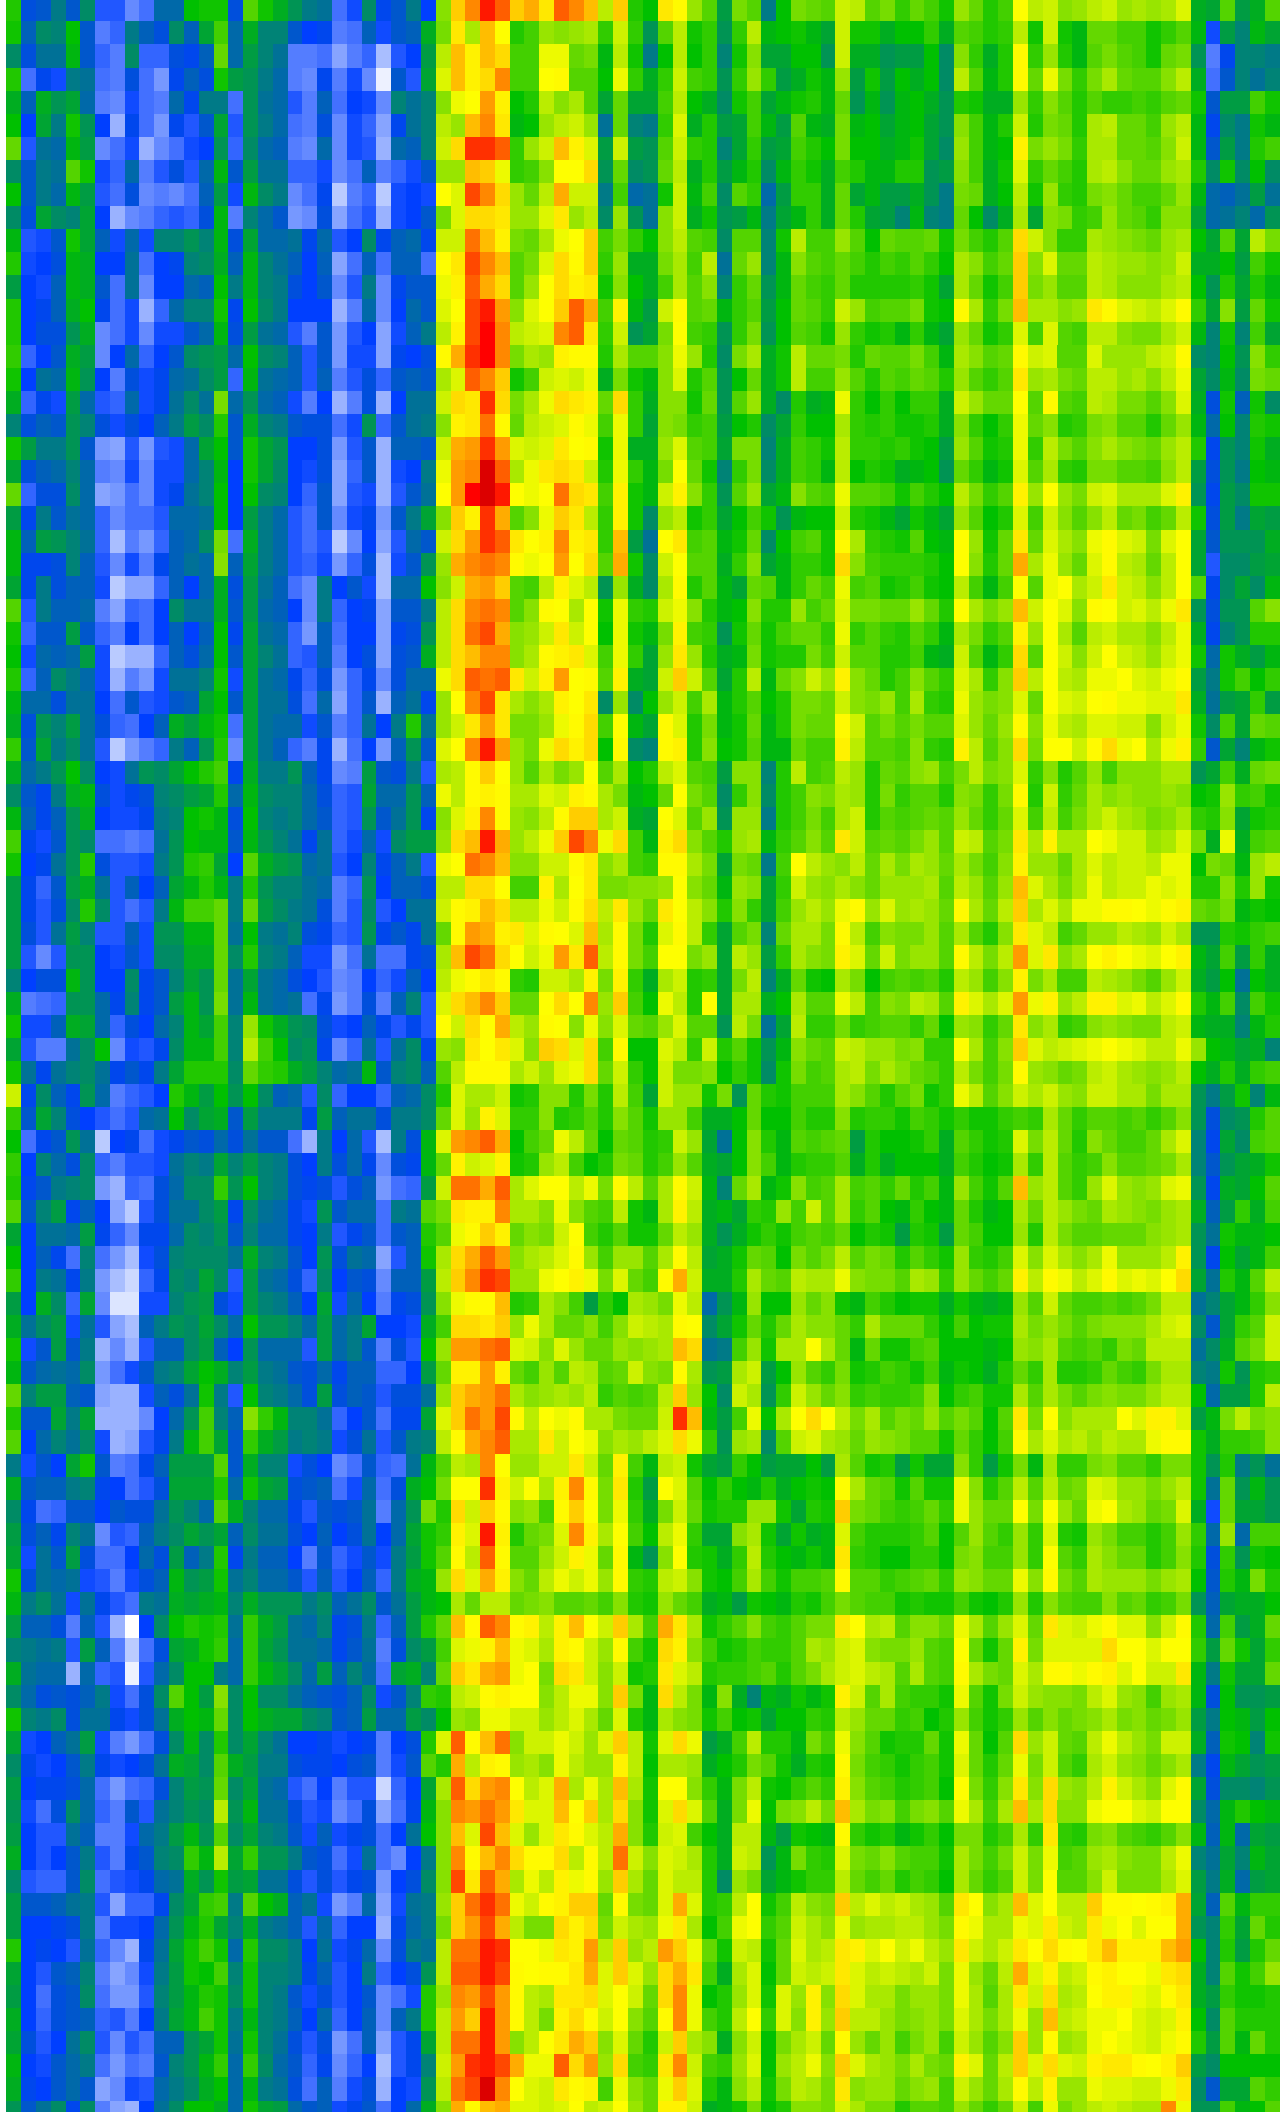

At3g12140  
At5g17510  
At3g56860  
At3g04460  
At2g41060  
At2g19390  
At3g06670  
At4g00270  
At3g52100  
At5g27720  
At1g58250  
At1g19485  
At1g70620  
At3g57300  
At5g23080  
At5g55300  
At5g47690  
At2g36720  
At3g04160  
At4g36960  
At4g36690  
At4g10710  
At5g02770  
At5g13020  
At4g17330  
At1g10390  
At2g33440  
At3g06010  
At3g56690  
At5g16270  
At5g64360  
At3g06340  
At3g09100  
At3g21810  
At5g24670  
At5g18040  
At3g06480  
At3g52040  
At1g10570  
At3g24010  
At3g50380  
At4g08310  
At5g43790  
At1g16680  
At5g40440  
At1g08040  
At1g48780  
At4g26800  
At4g20090  
At1g50200  
At1g13040  
At5g01400  
At1g49590  
At5g19950  
At3g25440  
At3g44680  
At4g00690  
At3g59470  
At2g26990  
At4g21170  
At3g26400  
At2g02090  
At1g63490  
At5g58920  
At1g80550  
At1g33700  
At1g14650  
At2g29190  
At1g76630  
At3g09060  
At4g08460  
At3g08780  
At1g11400  
At2g13750  
At1g51520  
At3g03950  
At1g09290  
At1g22970  
At1g68790  
At1g06270  
At3g28700  
At1g13690  
At5g16780  
At1g05410  
At1g30480  
At2g31970  
At5g51940  
At3g51530  
At3g50670  
At2g43190  
At1g15200  
At1g09815

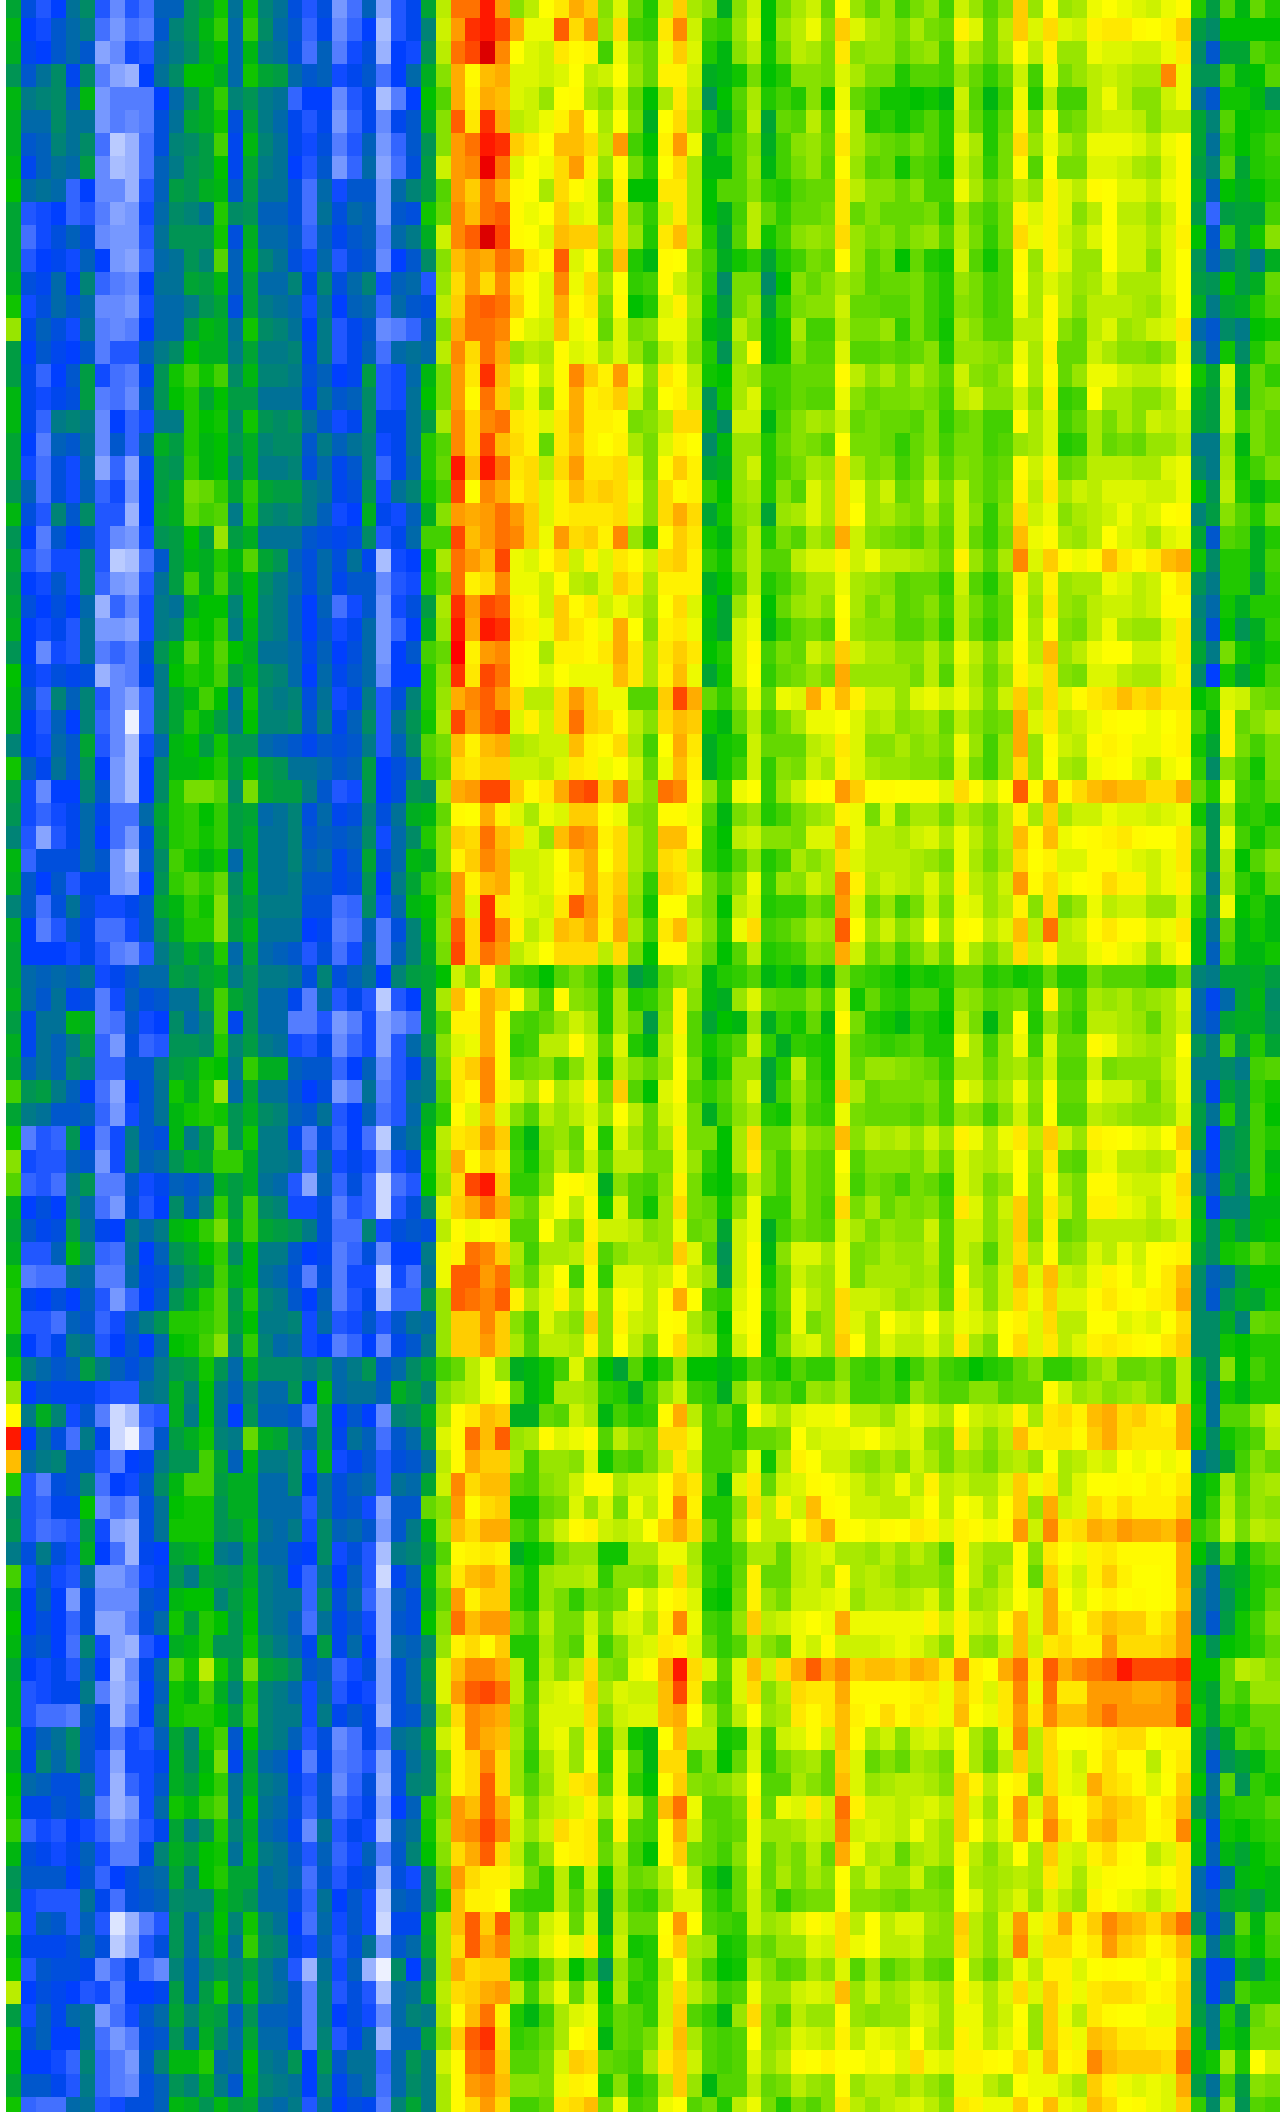

At3g50670  
At2g43190  
At1g15200  
At1g09815  
At1g66660  
At5g52040  
At5g67530  
At3g61860  
At2g17870  
At1g20960  
At3g26560  
At1g47970  
At1g17760  
At2g38420  
At2g15270  
At4g26190  
At2g30280  
At5g05540  
At1g32490  
At1g48950  
At5g58120  
At3g53500  
At4g17620  
At1g80070  
At1g47570  
At1g79200  
At3g19630  
At3g15590  
At2g47790  
At3g62310  
At5g16260  
At4g00830  
At1g80680  
At2g42630  
At3g28730  
At5g42920  
At2g16640  
At3g15120  
At5g51300  
At2g16940  
At2g17410  
At2g25970  
At1g66510  
At3g49640  
At4g21800  
At1g19290  
At4g39160  
At3g19840  
At1g16480  
At3g54280  
At4g15570  
At1g53720  
At1g50140  
At1g73350  
At2g03150  
At3g19650  
At3g54170  
At2g34790  
At3g66652  
At2g23060  
At5g51980  
At5g17020  
At5g67320  
At2g27760  
At1g55150  
At4g02230  
At3g63250  
At5g59380  
At3g04130  
At4g11060  
At3g56990  
At5g61400  
At1g52510  
At4g09140  
At1g03830  
At2g27170  
At3g18640  
At1g30460  
At5g13680  
At5g46070  
At5g51410  
At4g19150  
At4g22670  
At1g79730  
At1g65440  
At3g19760  
At2g41520  
At5g41770  
At1g50300  
At2g38370  
At4g36260  
At1g27595

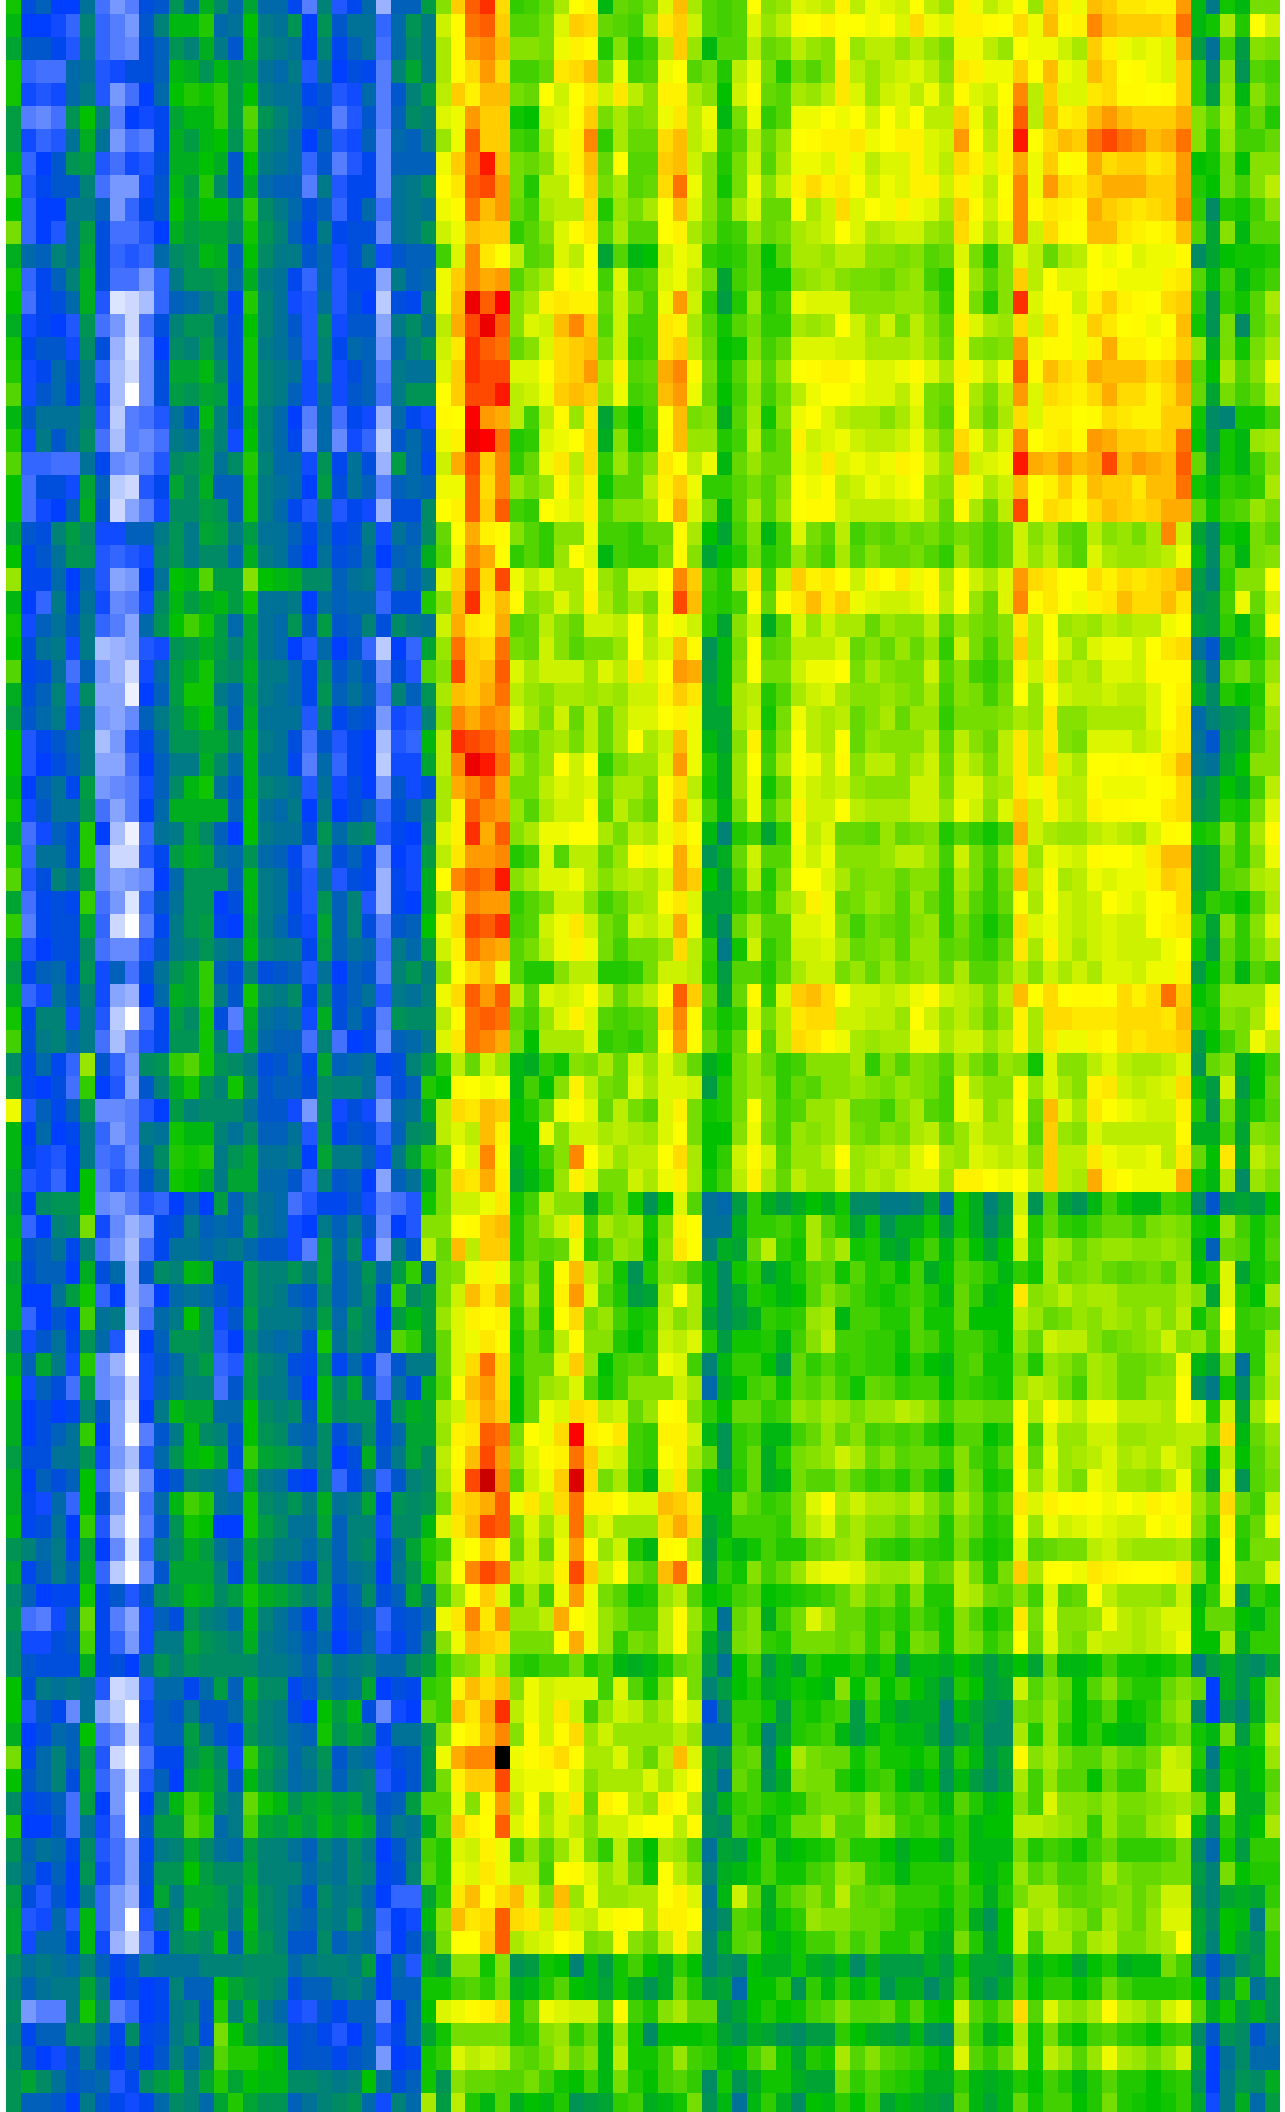

At1g505300  
At2g38370  
At4g36260  
At1g27595  
At1g26170  
At1g80790  
At5g04290  
At3g48710  
At3g44490  
At5g42400  
At4g16470  
At2g07696  
At2g24250  
At2g47980  
At1g02840  
At3g52890  
At3g54670  
At3g22220  
At5g46620  
At1g18950  
At1g48410  
At4g27690  
At3g51310  
At3g02400  
At4g29940  
At4g02560  
At5g38840  
At4g01880  
At3g02320  
At5g53770  
At2g26590  
At4g35570  
At5g22320  
At2g40650  
At1g02330  
At3g19510  
At3g54010  
At1g05180  
At5g61150  
At1g64750  
At3g18860  
At3g46950  
At3g26640  
At5g20930  
At3g29310  
At3g54610  
At1g19230  
At2g30260  
At4g22720  
At2g26810  
At3g11830  
At3g13580  
At4g15010  
At4g34270  
At3g53110  
At4g05460  
At1g15740  
At1g12910  
At1g78150  
At1g10590  
At4g15910  
At1g54510  
At2g04940  
At5g44750  
At1g09770  
At3g60250  
At3g12760  
At3g02550  
At5g49880  
At4g14385  
At3g01740  
At3g05760  
At2g30000  
At1g28420  
At4g00090  
At5g05980  
At5g10270  
At1g11270  
At4g32130  
At4g34860  
At3g10040  
At4g10280  
At2g43780  
At5g12190  
At1g16040  
At3g42320  
At2g19250  
At5g65760  
At4g01030  
At1g07745  
At3g15130  
At3g01580

At1g01780  
At1g07745  
At3g15130  
At3g01580  
At1g76280  
At1g25380  
At2g26790  
At5g06540  
At4g33560  
At1g43800  
At3g27220  
At3g27340  
At2g25910  
At4g00660  
At3g53240  
At2g41370  
At3g05680  
At1g79630  
At1g05500  
At4g11200  
At5g07640  
At1g17720  
At3g50690  
At4g17150  
At2g36485  
At5g18230  
At5g47010  
At1g79940  
At5g61990  
At3g56760  
At1g13910  
At3g55850  
At2g23950  
At5g02690  
At5g02680  
At5g41620  
At4g23980  
At5g41150  
At3g49810  
At1g53710  
At1g72500  
At5g06970  
At1g74510  
At5g52280  
At5g53340  
At3g01780  
At1g06550  
At4g20270  
At5g12970  
At3g25110  
At4g36920  
At1g71870  
At2g46410  
At5g12330  
At5g01870  
At1g76270  
At1g10290  
At5g04560  
At3g19980  
At4g34450  
At4g24840  
At5g18830  
At5g16050  
At3g18430  
At3g27100  
At5g12270  
At2g29960  
At5g09690  
At1g79030  
At1g54360  
At1g60220  
At5g56790  
At2g36910  
At5g61190  
At5g63940  
At4g27180  
At5g12400  
At1g06760  
At3g01590  
At1g19870  
At1g51690  
At3g63180  
At2g18630  
At5g62165  
At1g80870  
At3g02520  
At1g54990  
At1g25580  
At2g35430  
At5g47750  
At3g25710  
At1g22030

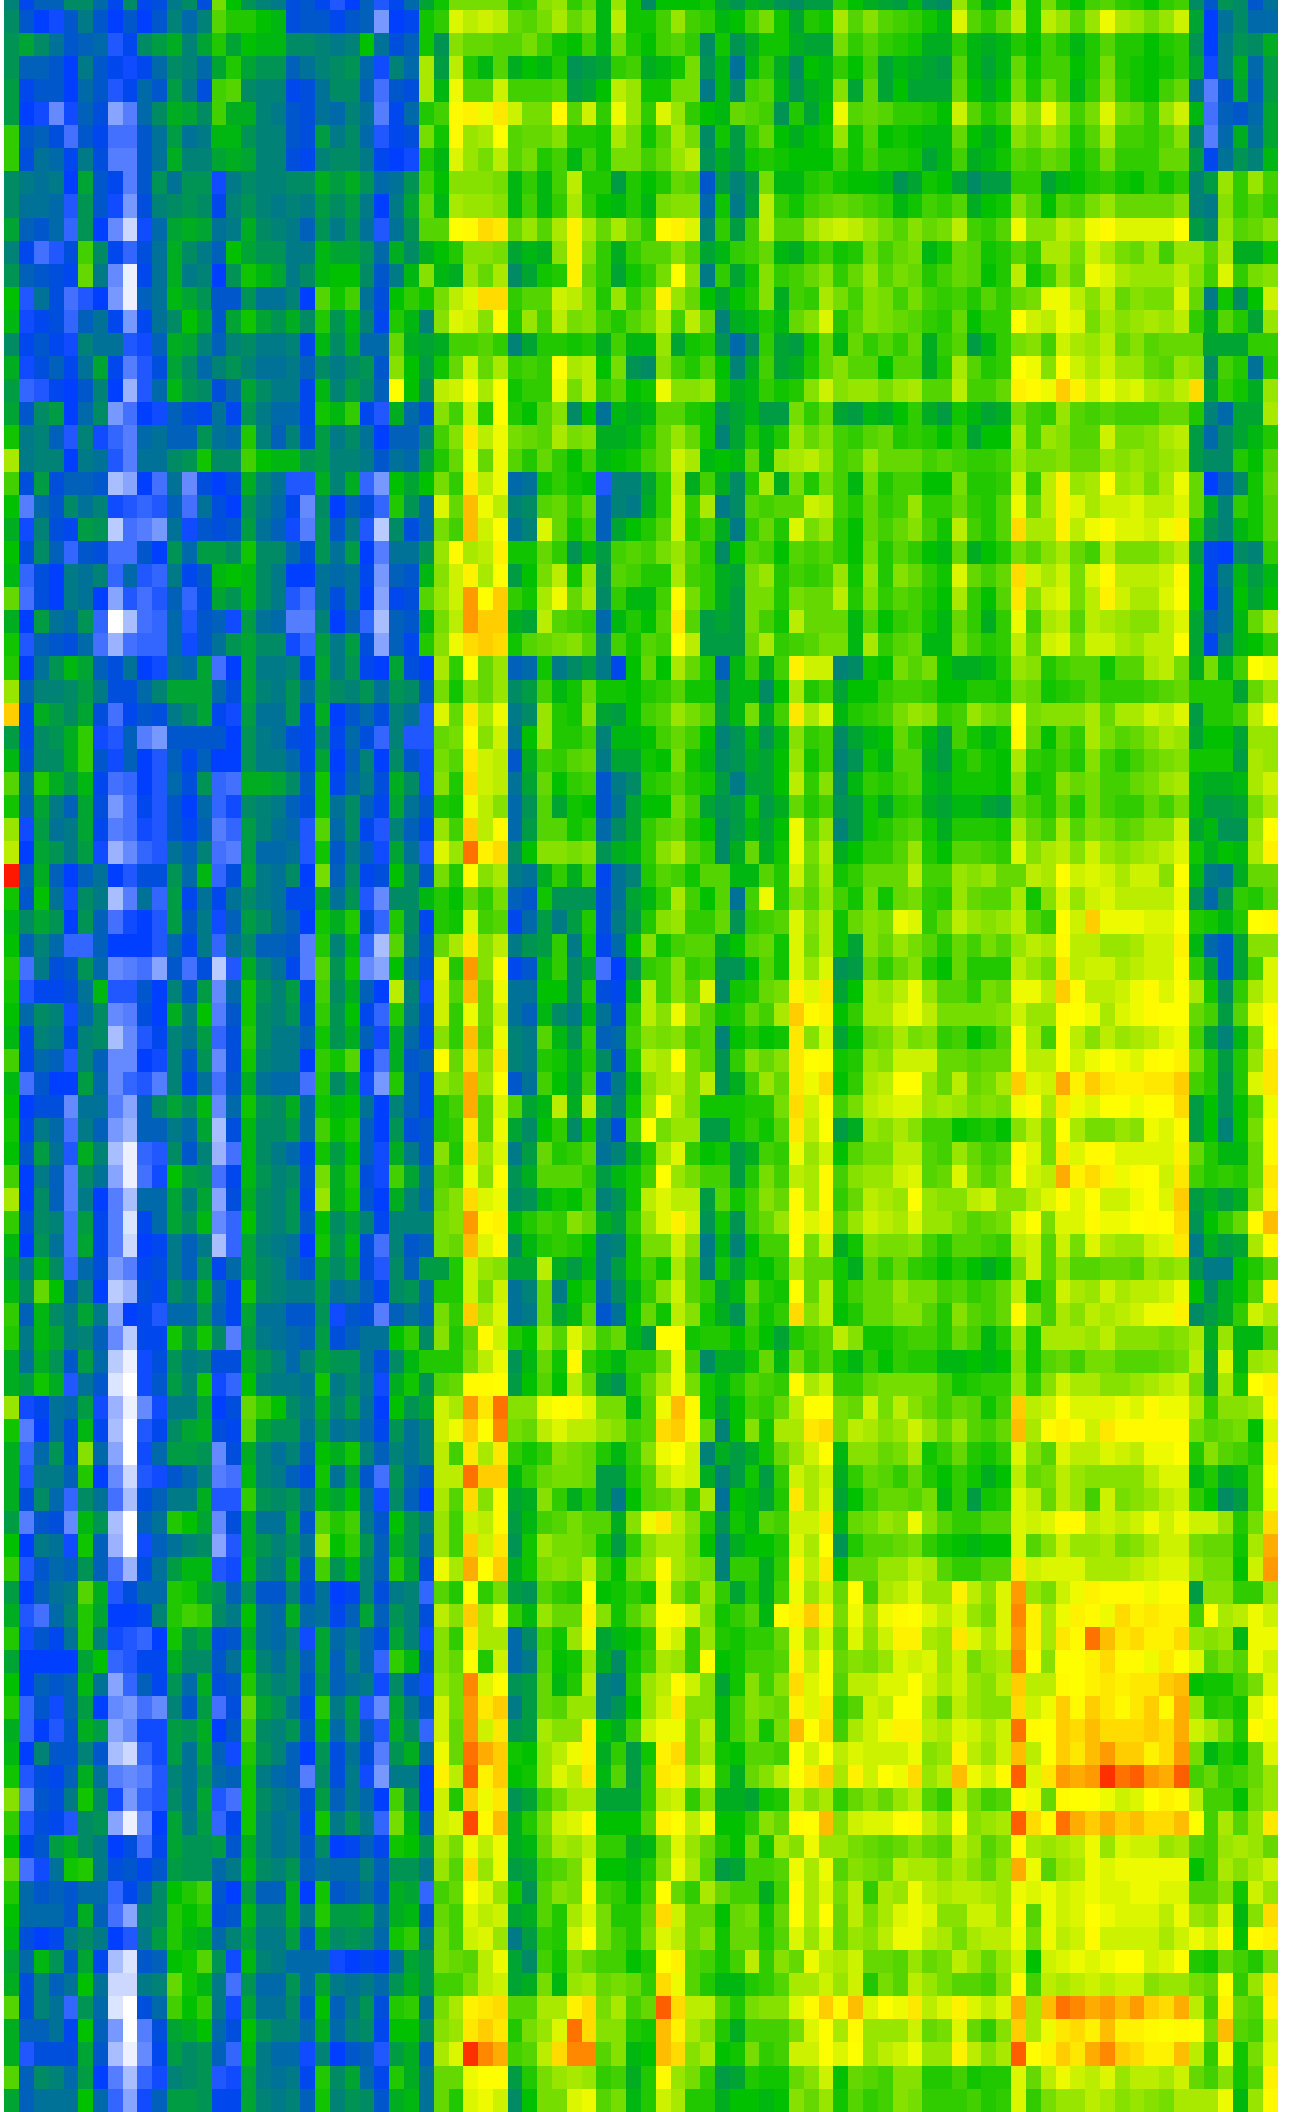

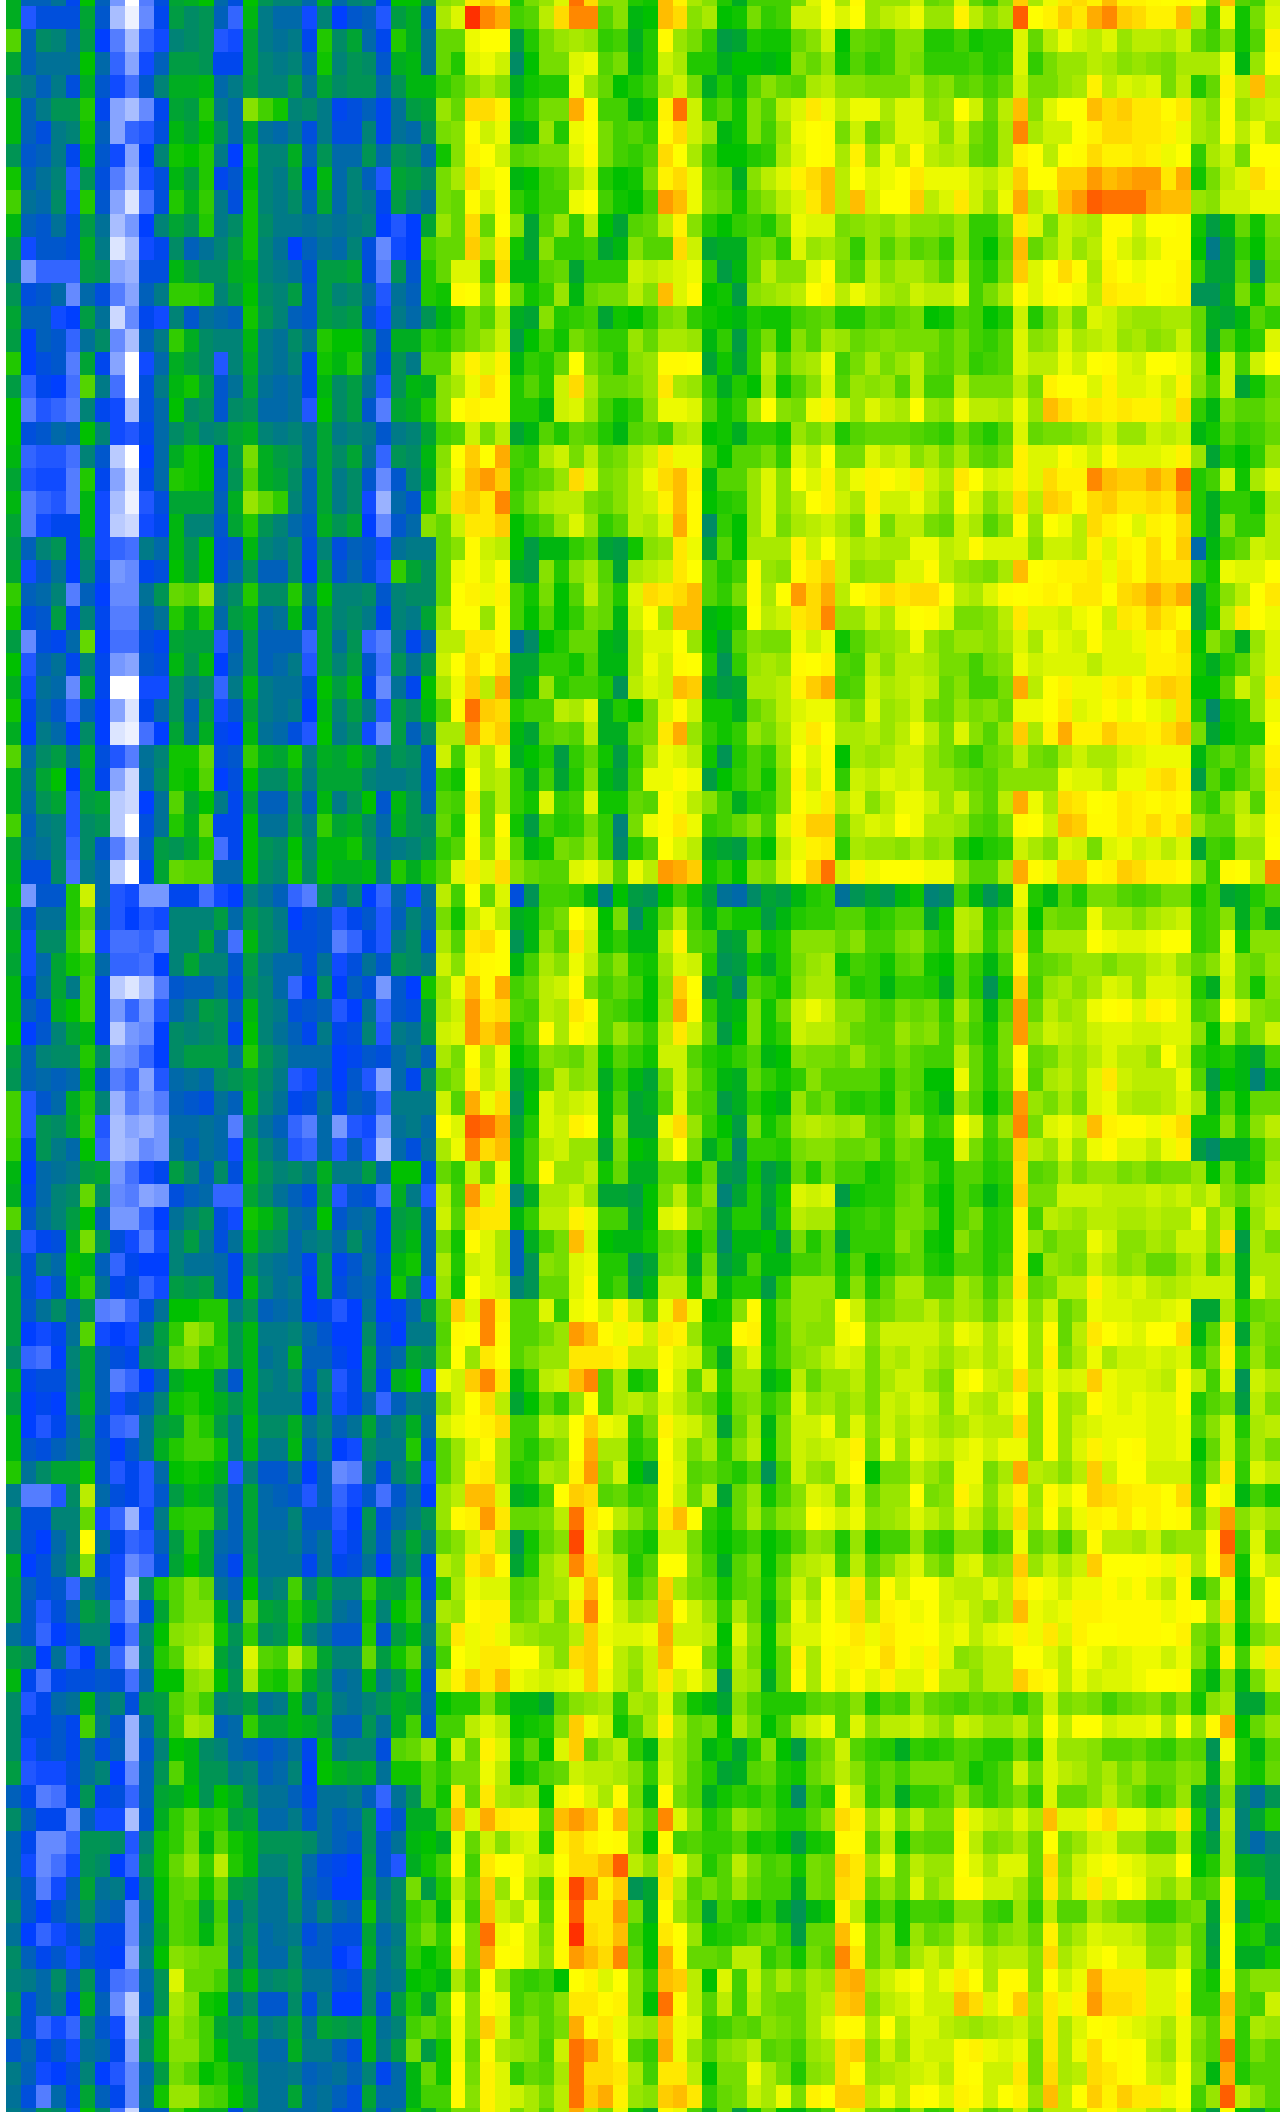

At5g47750  
At3g25710  
At1g22030  
At1g31320  
At1g54460  
At1g67720  
At2g18500  
At5g60200  
At1g05710  
At1g79690  
At3g18480  
At1g65270  
At3g50230  
At1g11840  
At1g10130  
At5g65640  
At2g29020  
At1g55880  
At3g49920  
At3g57650  
At2g18390  
At1g24050  
At5g19680  
At2g26400  
At4g02010  
At4g25120  
At2g27460  
At1g29990  
At4g24490  
At5g60640  
At1g62970  
At1g52730  
At1g32330  
At3g58540  
At2g47830  
At2g46700  
At5g17800  
At2g46920  
At1g20560  
At5g23320  
At5g61060  
At3g62080  
At5g40280  
At5g20320  
At2g46560  
At1g09410  
At1g06580  
At1g58230  
At4g25880  
At4g16310  
At3g33530  
At5g58520  
At1g69170  
At1g13980  
At1g29950  
At3g54390  
At5g46920  
At1g53460  
At5g06180  
At5g22700  
At4g17960  
At2g38660  
At4g10420  
At3g12200  
At5g55160  
At5g23405  
At4g18400  
At3g09900  
At4g00200  
At3g03360  
At4g30820  
At2g35630  
At3g23900  
At1g31020  
At5g43460  
At2g42810  
At5g58100  
At1g02140  
At1g14510  
At4g31720  
At1g73820  
At1g08210  
At5g56900  
At3g62130  
At3g12130  
At2g39230  
At5g55130  
At4g39550  
At3g55460  
At4g15900  
At3g17590

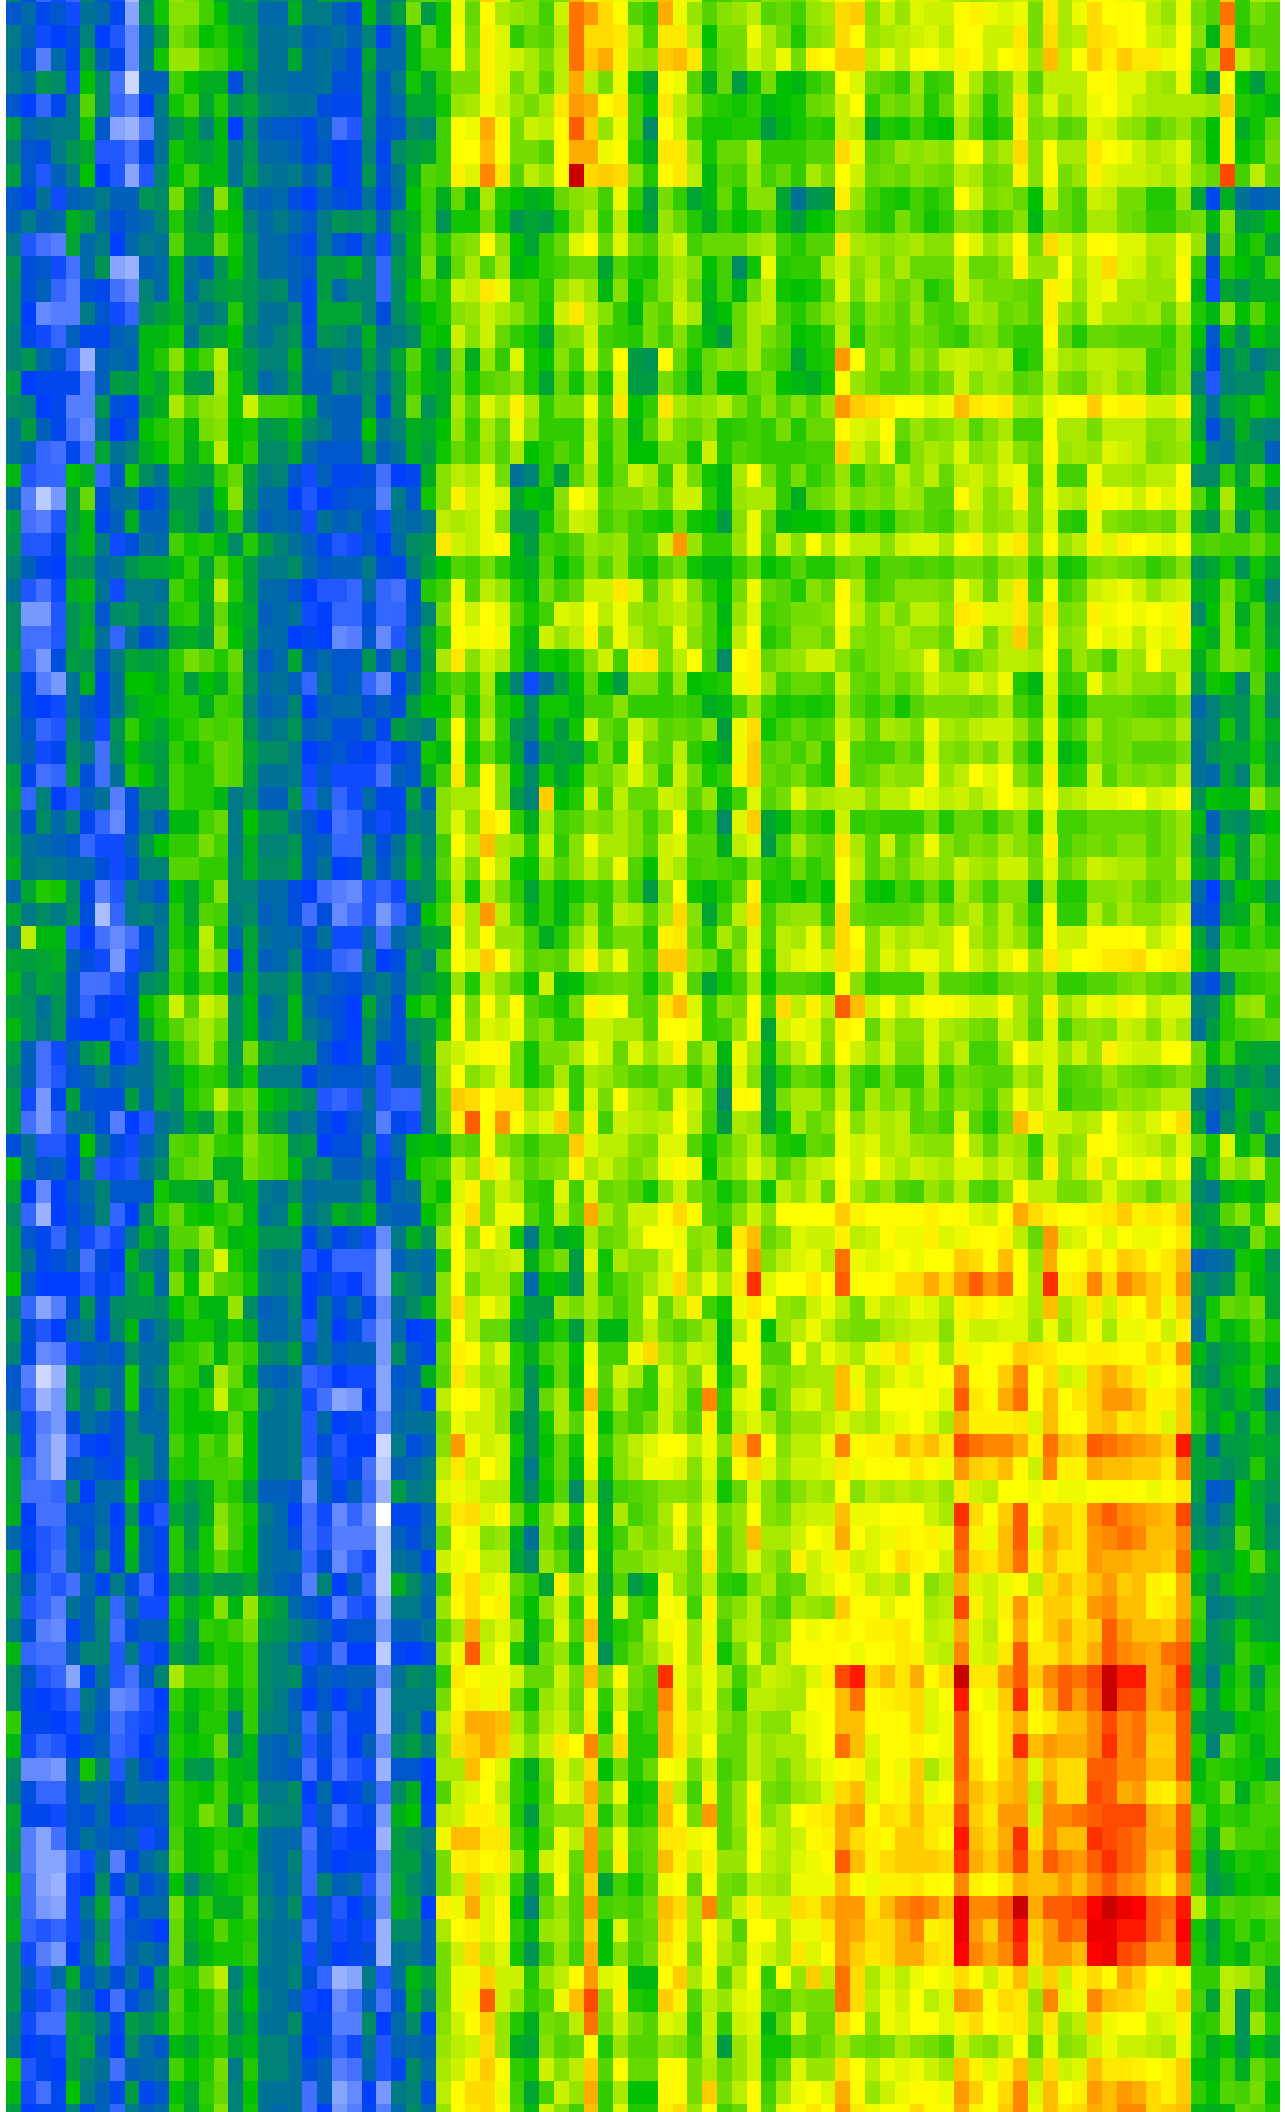

At3g55460  
At4g15900  
At3g17590  
At3g42790  
At1g24450  
At4g28910  
At3g08620  
At2g41620  
At5g44450  
At5g66770  
At1g12930  
At1g01960  
At4g00231  
At1g53000  
At5g48990  
At5g58470  
At3g06250  
At5g05660  
At1g49940  
At1g66730  
At4g15820  
At5g65260  
At2g32170  
At1g43900  
At2g37320  
At4g08790  
At5g16310  
At4g36290  
At5g64830  
At5g65880  
At4g37170  
At5g61330  
At1g27050  
At5g50310  
At2g26200  
At4g11160  
At1g28060  
At1g06710  
At3g59630  
At1g20300  
At4g25210  
At5g53060  
At5g63120  
At5g20170  
At4g04790  
At5g06190  
At1g65560  
At5g19310  
At3g60240  
At3g55030  
At2g47020  
At5g51230  
At1g48050  
At3g51320  
At5g19920  
At3g49660  
At5g27400  
At5g20290  
At1g11280  
At1g74720  
At5g61830  
At5g25490  
At1g73490  
At2g41600  
At5g59710  
At3g14800  
At5g09860  
At5g07630  
At5g58090  
At5g50020  
At1g31150  
At1g05460  
At5g28640  
At3g21100  
At2g21150  
At4g32551  
At1g06500  
At3g54720  
At5g55670  
At2g45700  
At5g04940  
At4g16650  
At1g52310  
At2g20000  
At2g25420  
At2g27980  
At3g24490  
At1g54440  
At1g63150  
At4g32360  
At3g61670  
At5g55880

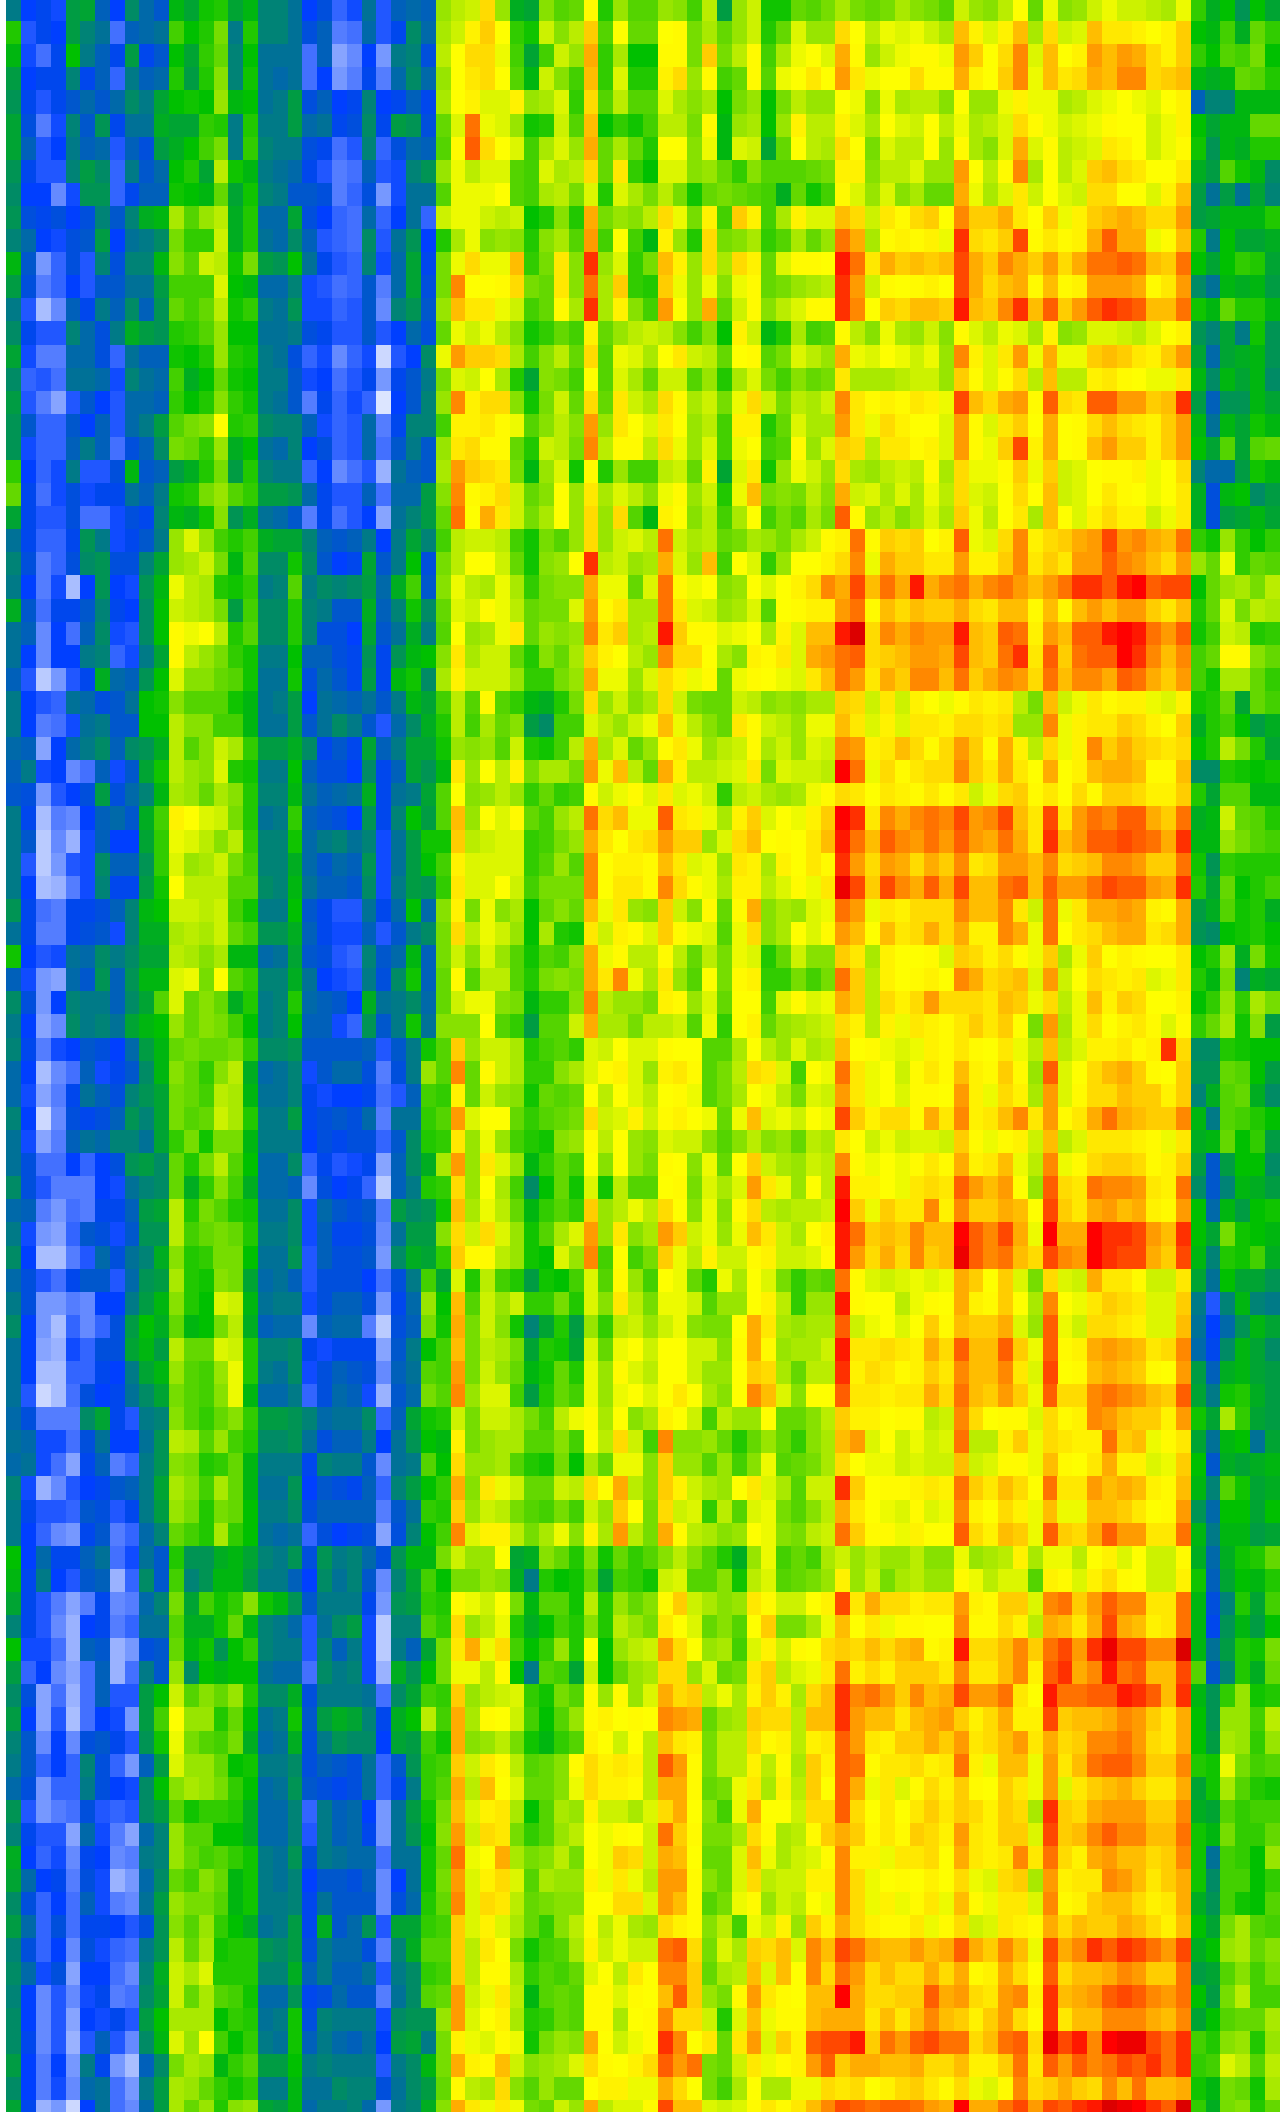

At1g63150  
At4g32360  
At3g61670  
At5g55660  
At1g68080  
At5g58440  
At2g29210  
At5g48960  
At3g21280  
At5g22280  
At1g17110  
At3g02890  
At3g18380  
At3g22520  
At1g29710  
At3g13226  
At5g15010  
At1g04590  
At2g23755  
At2g04660  
At4g39680  
At5g53180  
At5g04280  
At3g42670  
At3g43920  
At4g24610  
At2g39090  
At1g71310  
At2g28070  
At3g33520  
At3g02950  
At2g43810  
At5g44740  
At1g69950  
At5g43500  
At1g07970  
At3g56900  
At1g60560  
At2g13540  
At5g23690  
At3g49720  
At3g06910  
At3g18160  
At4g32970  
At5g45760  
At4g29170  
At1g71260  
At4g14660  
At4g32420  
At1g79220  
At3g54970  
At3g49430  
At3g13570  
At3g12530  
At1g02110  
At2g37400  
At3g10690  
At5g47210  
At3g24320  
At3g52170  
At5g41970  
At3g21350  
At3g13960  
At1g29980  
At1g20910  
At5g45780  
At5g02530  
At4g17020  
At2g33290  
At3g58520  
At5g44500  
At1g21740  
At3g61240  
At1g69400  
At3g48150  
At3g18165  
At5g62290  
At3g62840  
At4g29840  
At5g49510  
At4g11790  
At3g63090  
At3g07590  
At5g51200  
At1g63160  
At4g27490  
At5g58240  
At1g34770  
At4g37210  
At3g48210  
At1g16900  
At5g05670



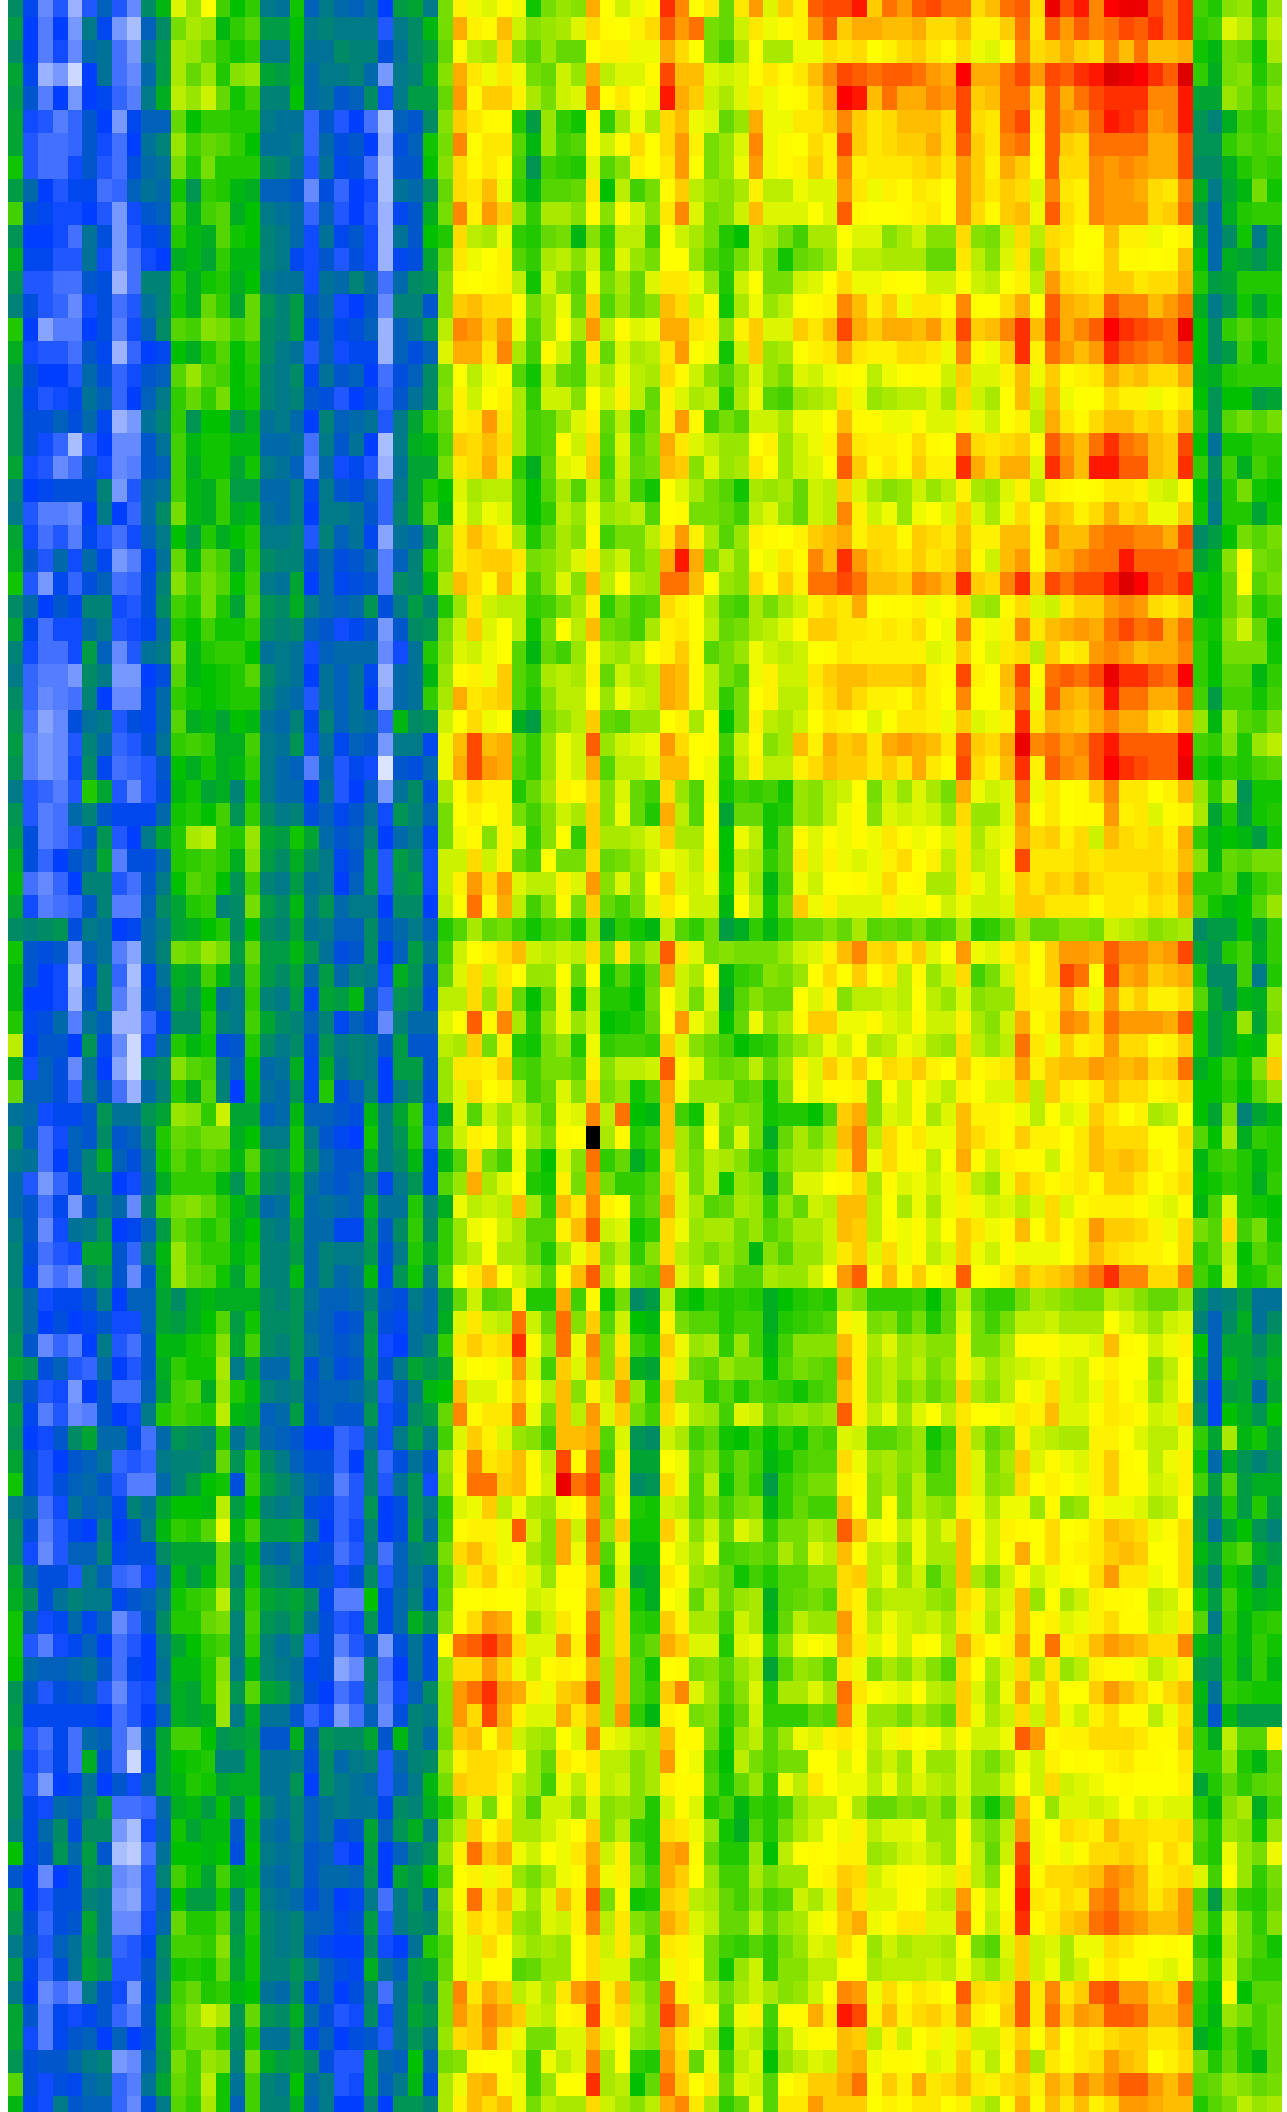

At4g37210  
At3g48210  
At1g16900  
At5g05670  
At1g77470  
At5g40480  
At4g38890  
At3g49890  
At5g06160  
At1g09190  
At4g33990  
At5g48330  
At4g23860  
At3g20010  
At1g13120  
At2g35030  
At4g29540  
At5g12100  
At3g19120  
At2g33410  
At5g19130  
At4g38130  
At3g27120  
At5g61460  
At2g03070  
At2g07734  
At2g16390  
At2g25570  
At1g09150  
At4g35050  
At4g38750  
At1g10180  
At5g44200  
At4g35020  
At1g32240  
At5g09300  
At1g67140  
At5g15170  
At1g18190  
At5g37240  
At1g11950  
At2g21060  
At5g23530  
At3g43210  
At5g14640  
At1g16970  
At5g47710  
At1g59750  
At5g03415  
At2g07716  
At1g08700  
At3g18030  
At3g17310  
At1g71990  
At4g14720  
At3g10200  
At1g14490  
At2g41550  
At4g34430  
At2g22840  
At3g09670  
At5g14170  
At1g17580  
At4g22360  
At3g48190  
At1g47340  
At3g18035  
At5g47160  
At4g32660  
At4g32620  
At5g64610  
At1g76170  
At1g15940  
At3g54350  
At3g12680  
At1g76860  
At1g15700  
At2g28390  
At1g76320  
At5g44180  
At4g02680  
At2g17930  
At3g03300  
At5g23570  
At3g59430  
At1g18450  
At4g31880  
At2g47620  
At4g15880  
At1g19980  
At5g25150

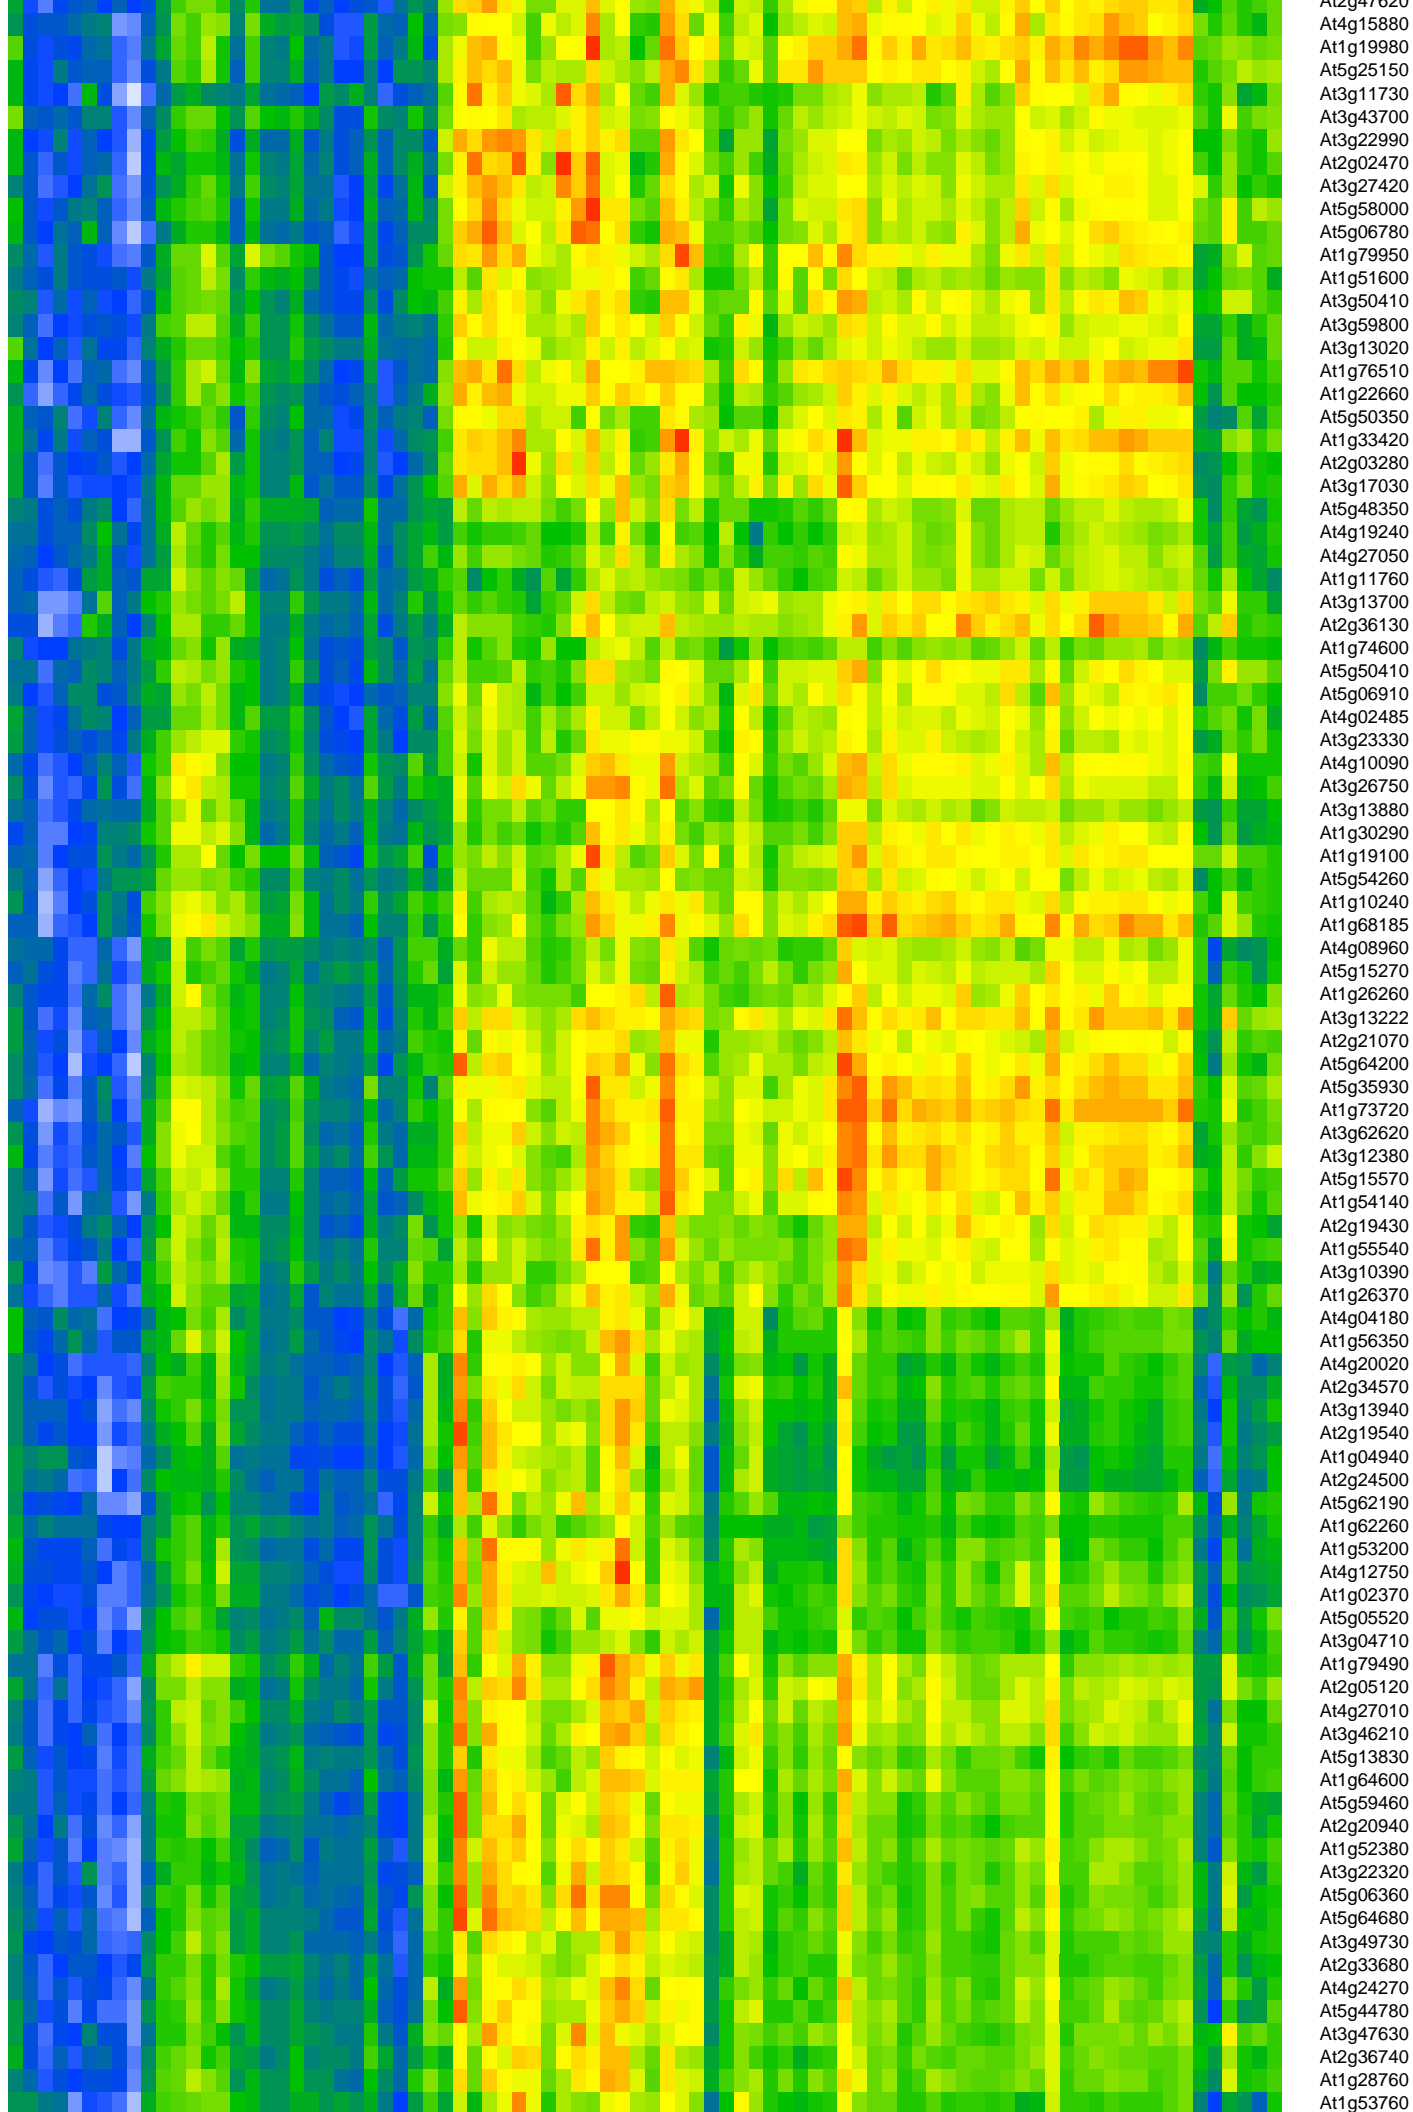

At2g47620  
At4g15880  
At1g19980  
At5g25150  
At3g11730  
At3g43700  
At3g22990  
At2g02470  
At3g27420  
At5g58000  
At5g06780  
At1g79950  
At1g51600  
At3g50410  
At3g59800  
At3g13020  
At1g76510  
At1g22660  
At5g50350  
At1g33420  
At2g03280  
At3g17030  
At5g48350  
At4g19240  
At4g27050  
At1g11760  
At3g13700  
At2g36130  
At1g74600  
At5g50410  
At5g06910  
At4g02485  
At3g23330  
At4g10090  
At3g26750  
At3g13880  
At1g30290  
At1g19100  
At5g54260  
At1g10240  
At1g68185  
At4g08960  
At5g15270  
At1g26260  
At3g13222  
At2g21070  
At5g64200  
At5g35930  
At1g73720  
At3g62620  
At3g12380  
At5g15570  
At1g54140  
At2g19430  
At1g55540  
At3g10390  
At1g26370  
At4g04180  
At1g56350  
At4g20020  
At2g34570  
At3g13940  
At2g19540  
At1g04940  
At2g24500  
At5g62190  
At1g62260  
At1g53200  
At4g12750  
At1g02370  
At5g05520  
At3g04710  
At1g79490  
At2g05120  
At4g27010  
At3g46210  
At5g13830  
At1g64600  
At5g59460  
At2g20940  
At1g52380  
At3g22320  
At5g06360  
At5g64680  
At3g49730  
At2g33680  
At4g24270  
At5g44780  
At3g47630  
At2g36740  
At1g28760  
At1g53760

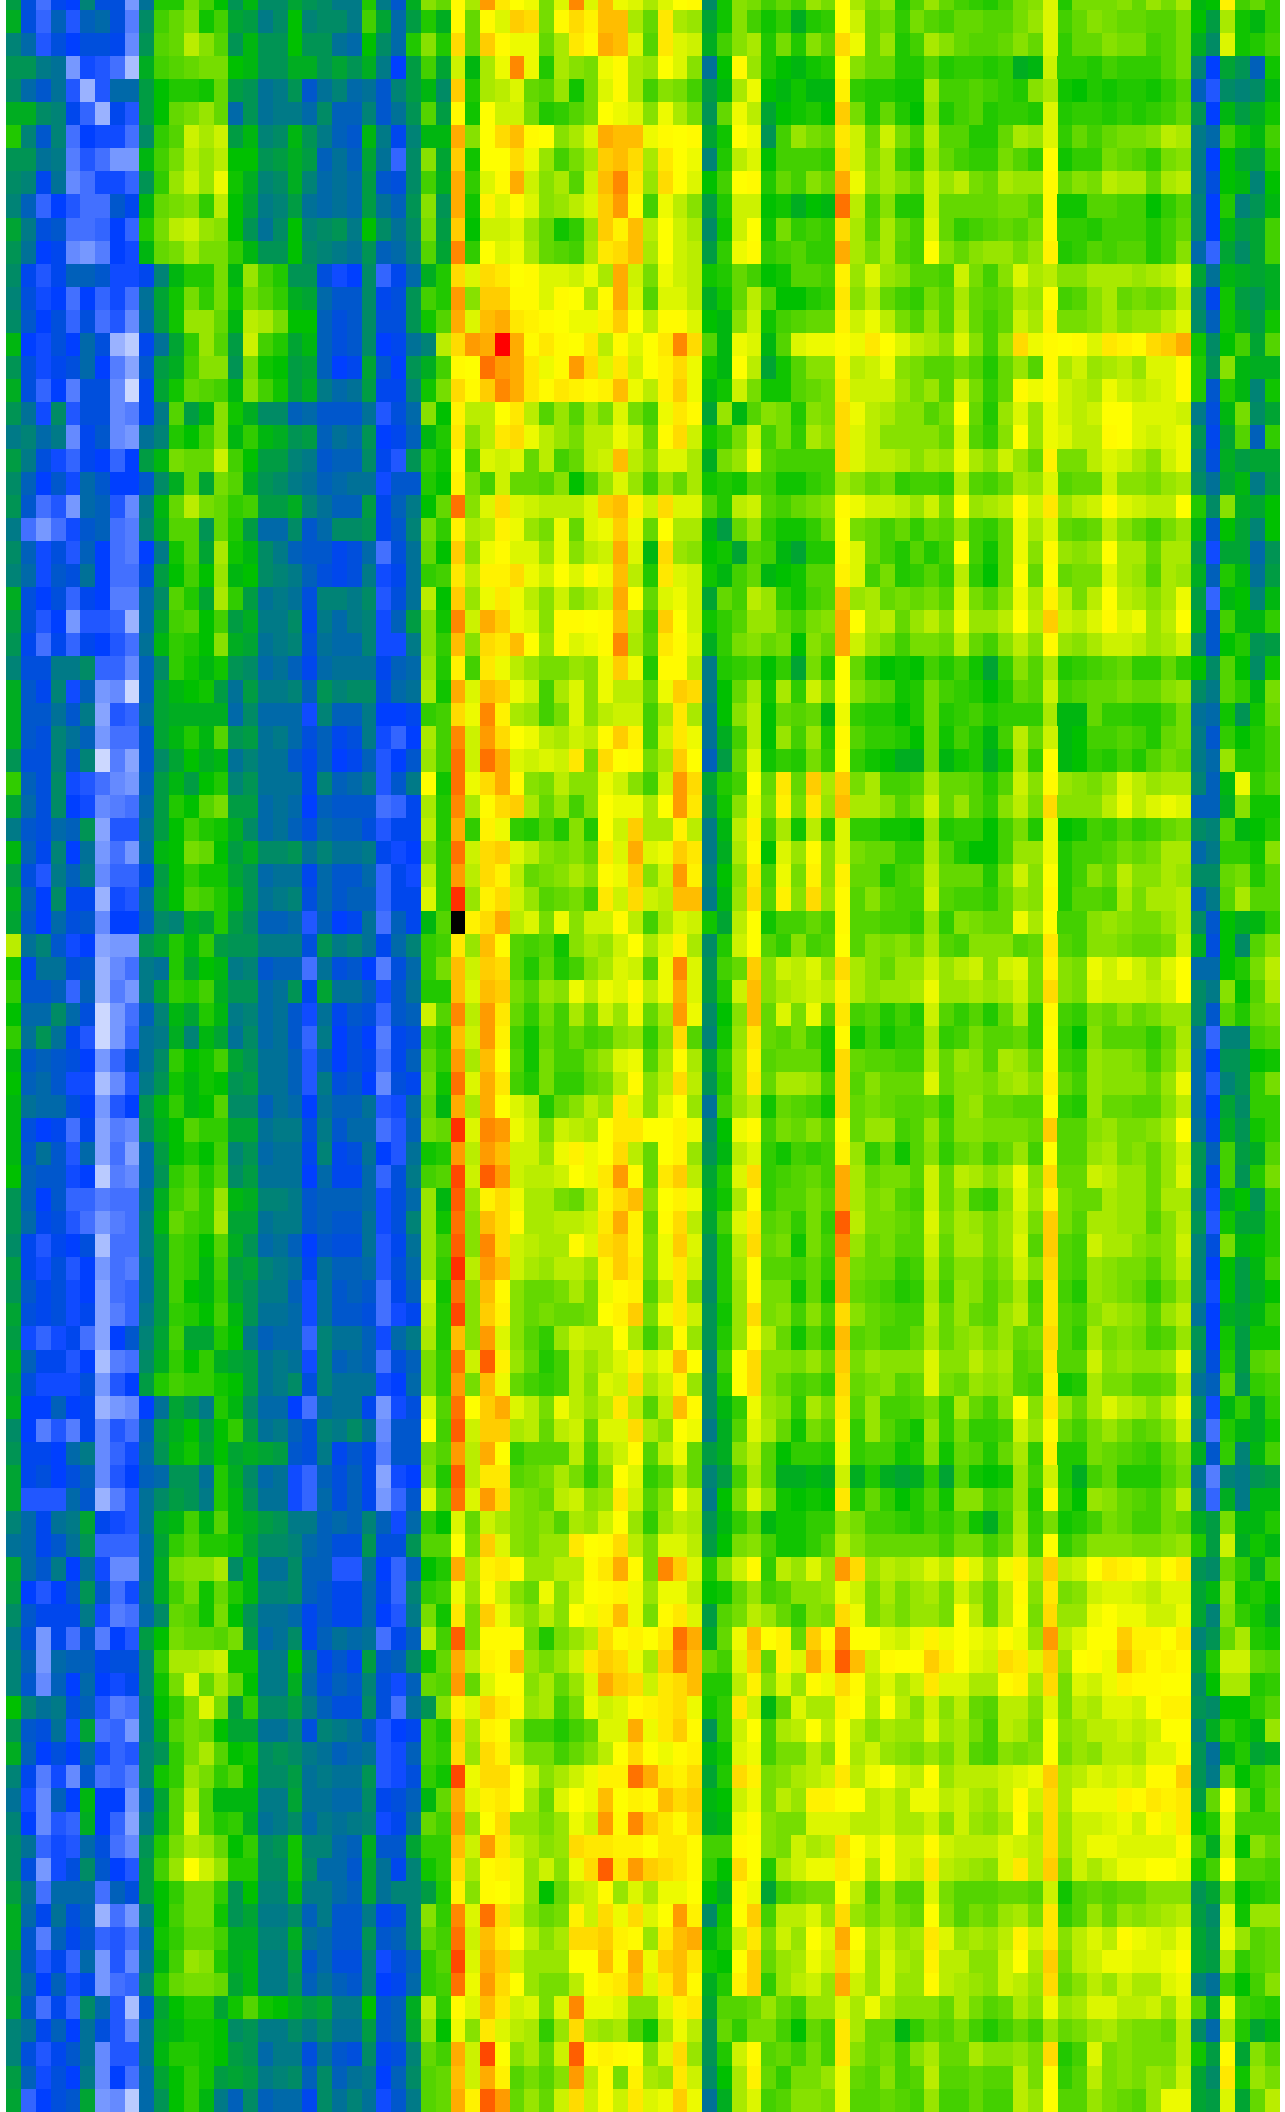

At3g47830  
At2g36740  
At1g28760  
At1g53760  
At1g07360  
At1g18900  
At5g59980  
At2g31240  
At3g53940  
At1g03530  
At1g30240  
At5g66540  
At1g48310  
At2g06040  
At2g06030  
At4g11560  
At3g07030  
At3g12640  
At1g10520  
At3g04500  
At2g37310  
At3g09430  
At3g07860  
At3g28720  
At5g65510  
At3g58600  
At1g72560  
At1g14850  
At4g26430  
At5g59180  
At5g53400  
At4g21090  
At1g67120  
At5g52820  
At2g27100  
At1g65650  
At4g27380  
At4g37090  
At4g03190  
At1g50920  
At5g64960  
At1g16830  
At1g52160  
At3g26410  
At1g42440  
At4g16630  
At4g26600  
At4g25730  
At3g01610  
At5g61880  
At3g21140  
At1g29940  
At1g10270  
At3g57660  
At4g28200  
At2g40700  
At3g22660  
At4g28450  
At4g21100  
At3g60360  
At1g23280  
At2g06990  
At1g64550  
At2g19480  
At1g07840  
At2g20280  
At1g09220  
At3g47840  
At1g31010  
At1g71060  
At3g26780  
At2g46230  
At4g02460  
At1g69200  
At1g28210  
At5g41010  
At1g74240  
At1g11240  
At2g45640  
At5g09770  
At1g01920  
At5g01230  
At1g04130  
At5g16750  
At3g44600  
At3g07750  
At3g12340  
At3g45100  
At1g80670  
At3g51270  
At2g28450  
At4g31180

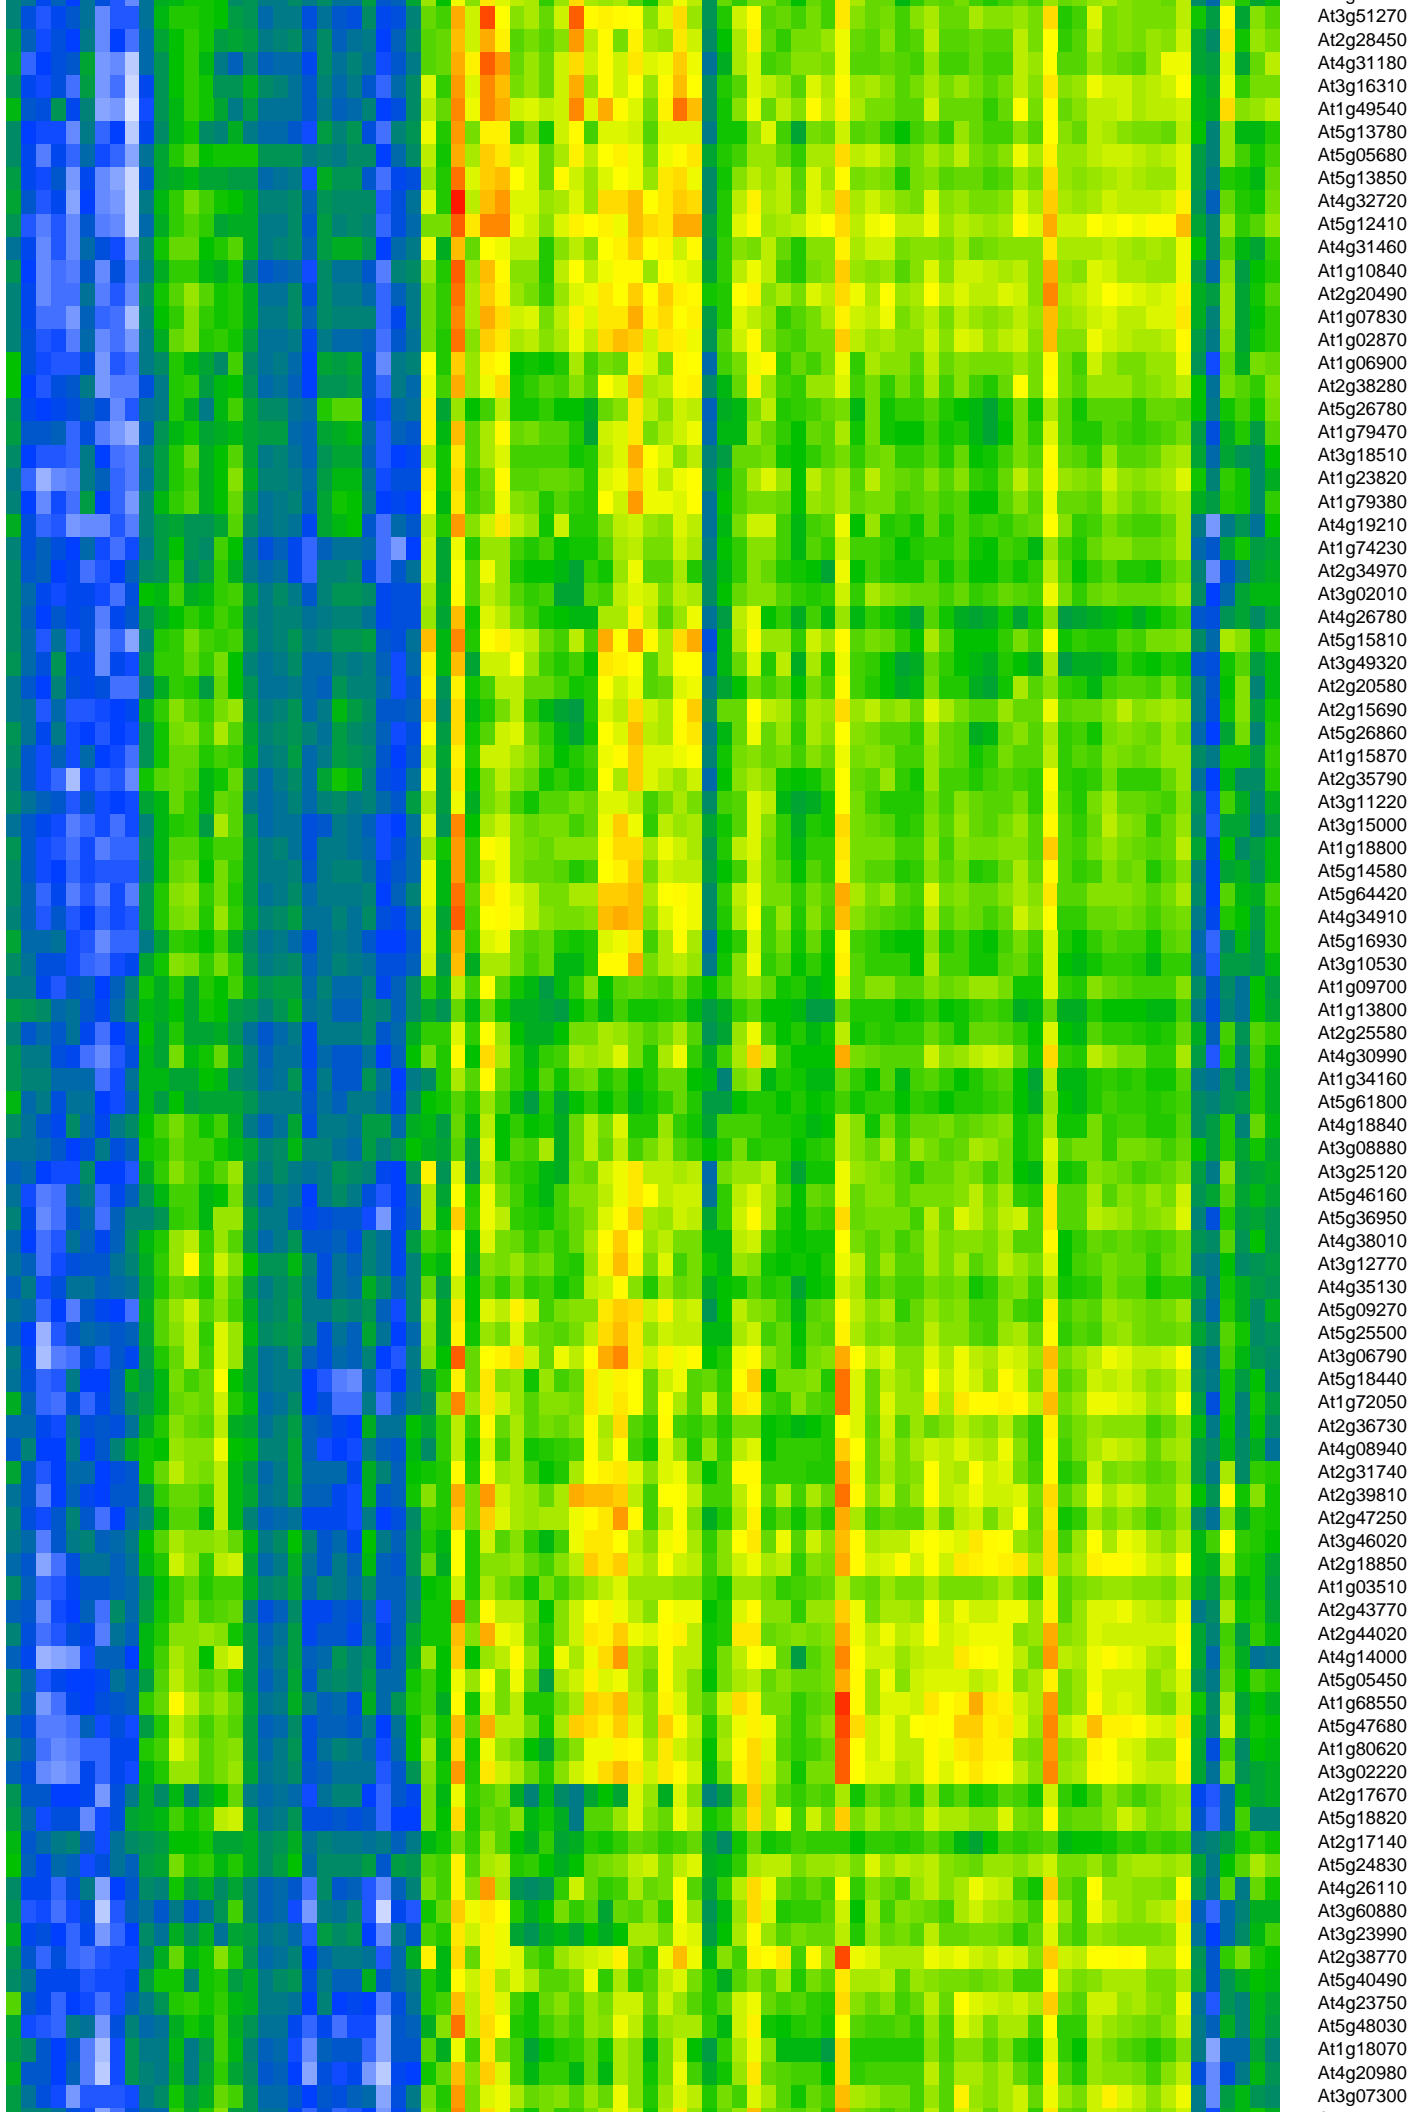

At3g51270  
At2g28450  
At4g31180  
At3g16310  
At1g49540  
At5g13780  
At5g05680  
At5g13850  
At4g32720  
At5g12410  
At4g31460  
At1g10840  
At2g20490  
At1g07830  
At1g02870  
At1g06900  
At2g38280  
At5g26780  
At1g79470  
At3g18510  
At1g23820  
At1g79380  
At4g19210  
At1g74230  
At2g34970  
At3g02010  
At4g26780  
At5g15810  
At3g49320  
At2g20580  
At2g15690  
At5g26860  
At1g15870  
At2g35790  
At3g11220  
At3g15000  
At1g18800  
At5g14580  
At5g64420  
At4g34910  
At5g16930  
At3g10530  
At1g09700  
At1g13800  
At2g25580  
At4g30990  
At1g34160  
At5g61800  
At4g18840  
At3g08880  
At3g25120  
At5g46160  
At5g36950  
At4g38010  
At3g12770  
At4g35130  
At5g09270  
At5g25500  
At3g06790  
At5g18440  
At1g72050  
At2g36730  
At4g08940  
At2g31740  
At2g39810  
At2g47250  
At3g46020  
At2g18850  
At1g03510  
At2g43770  
At2g44020  
At4g14000  
At5g05450  
At1g68550  
At5g47680  
At1g80620  
At3g02220  
At2g17670  
At5g18820  
At2g17140  
At5g24830  
At4g26110  
At3g60880  
At3g23990  
At2g38770  
At5g40490  
At4g23750  
At5g48030  
At1g18070  
At4g20980  
At3g07300

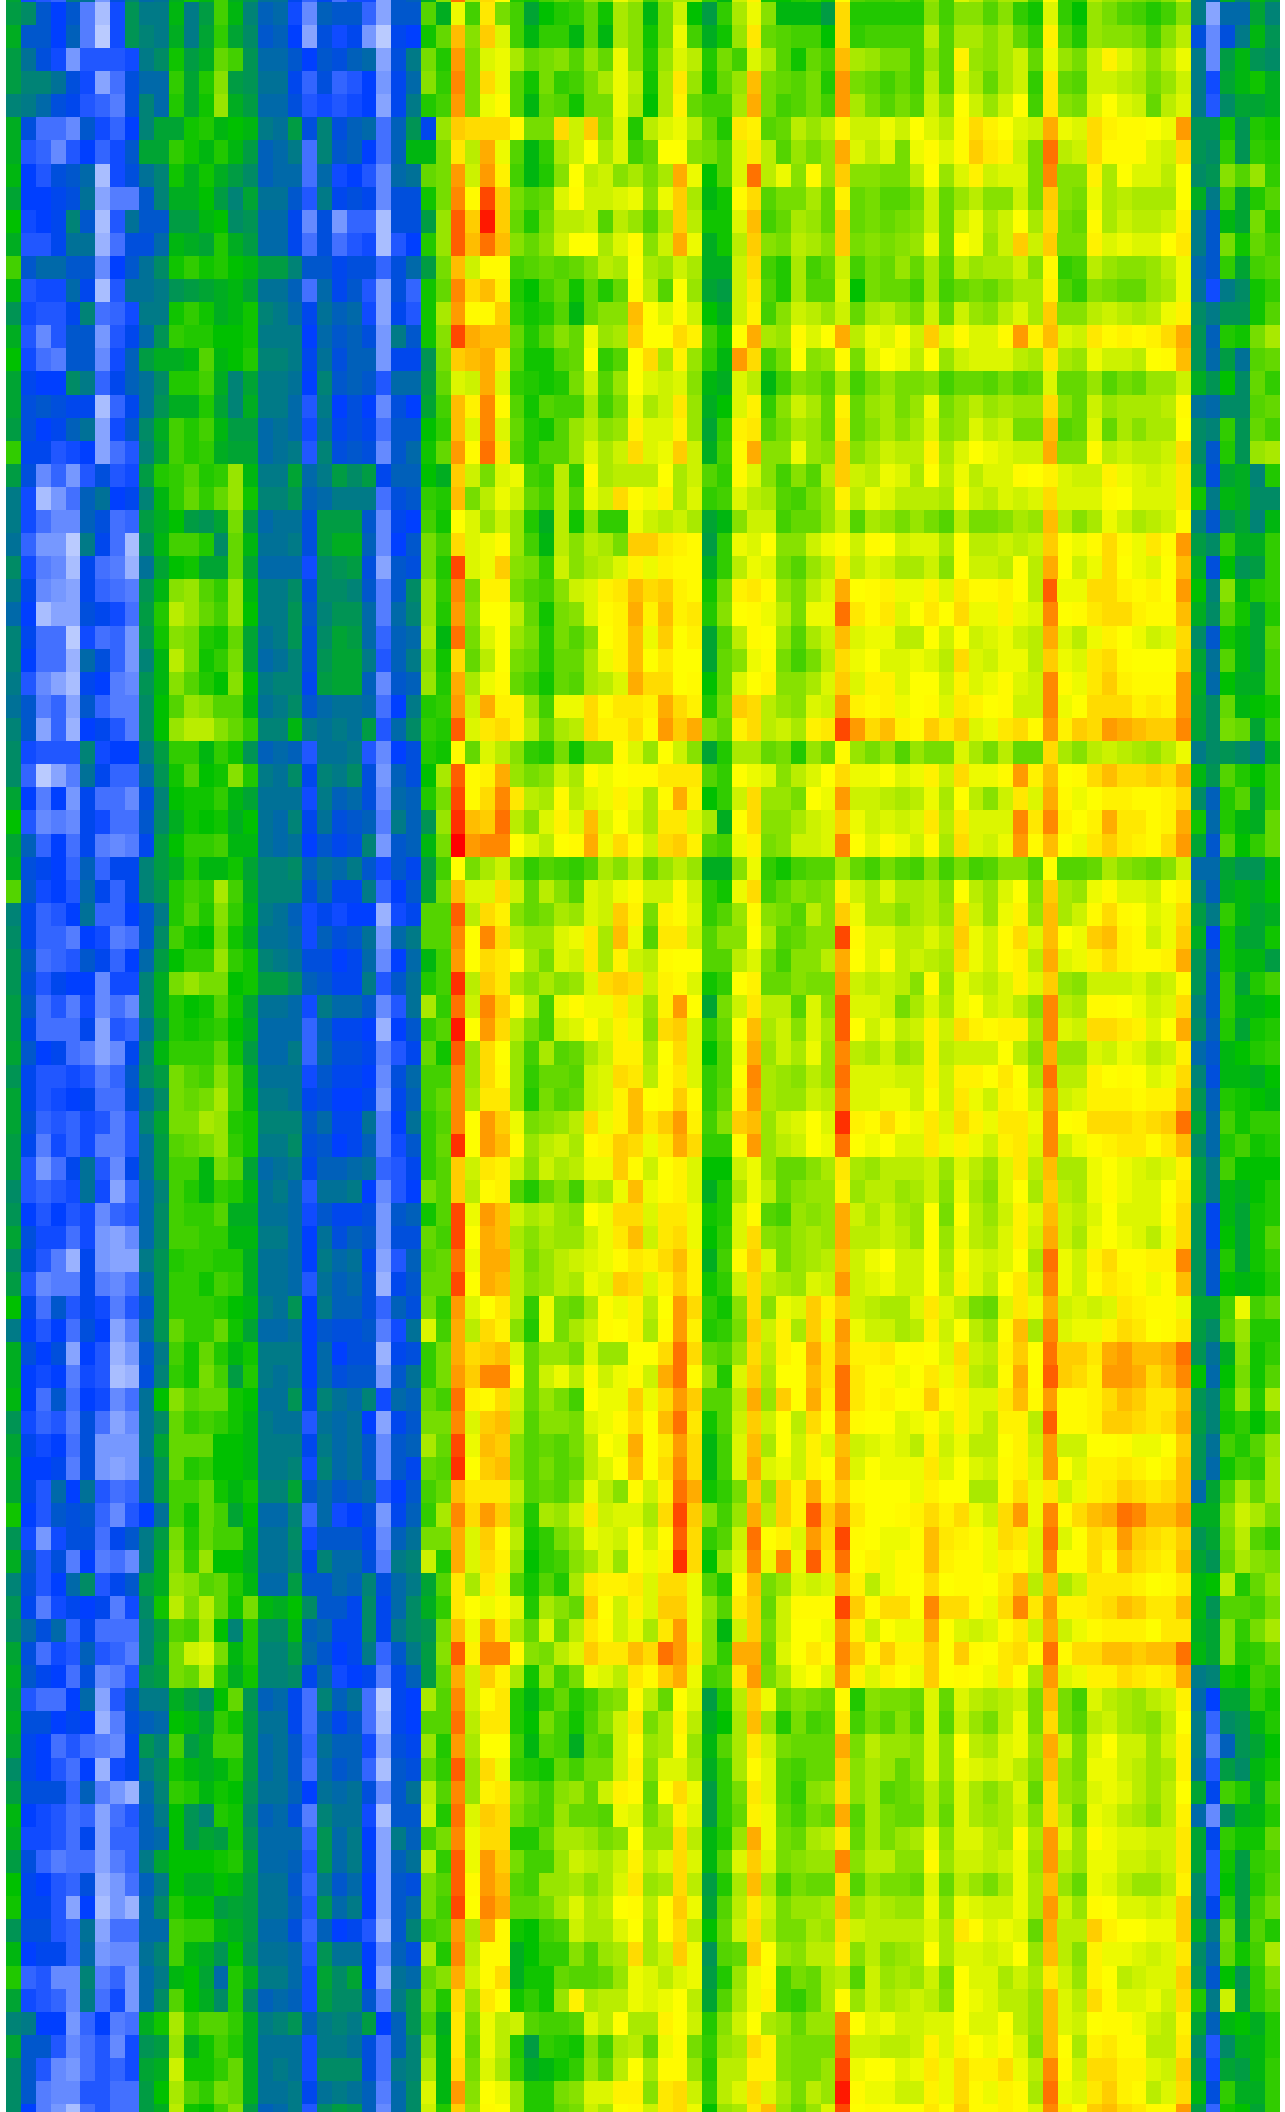

At1g18070  
At4g20980  
At3g07300  
At1g68990  
At3g15010  
At4g19400  
At2g34040  
At1g52980  
At1g12650  
At4g19610  
At5g42540  
At1g79540  
At3g24080  
At5g61310  
At1g06670  
At2g25670  
At3g58840  
At5g05210  
At5g57120  
At5g67230  
At1g16610  
At4g16800  
At2g27330  
At2g34520  
At3g11400  
At3g01790  
At3g06610  
At3g03920  
At5g40660  
At1g73940  
At3g05810  
At5g03740  
At3g07910  
At5g10350  
At5g22330  
At3g04610  
At1g04080  
At1g62350  
At3g20430  
At1g76300  
At1g54380  
At1g14770  
At1g72320  
At5g20920  
At5g52470  
At1g48920  
At2g43650  
At5g39840  
At5g17930  
At5g45140  
At5g05560  
At4g11120  
At4g10760  
At3g11964  
At2g20060  
At4g31120  
At5g16040  
At2g22400  
At1g15480  
At5g35910  
At3g16840  
At2g39795  
At2g40360  
At5g19300  
At5g60040  
At1g33410  
At4g02820  
At5g20600  
At1g76120  
At1g05910  
At3g21480  
At1g12830  
At2g25355  
At1g73180  
At2g34357  
At2g36070  
At2g31410  
At5g26110  
At3g52140  
At4g07410  
At4g11420  
At1g06720  
At5g14520  
At3g17465  
At1g04870  
At5g14800  
At3g02200  
At1g55040  
At1g77050  
At3g07050  
At5g61020  
At1g04540

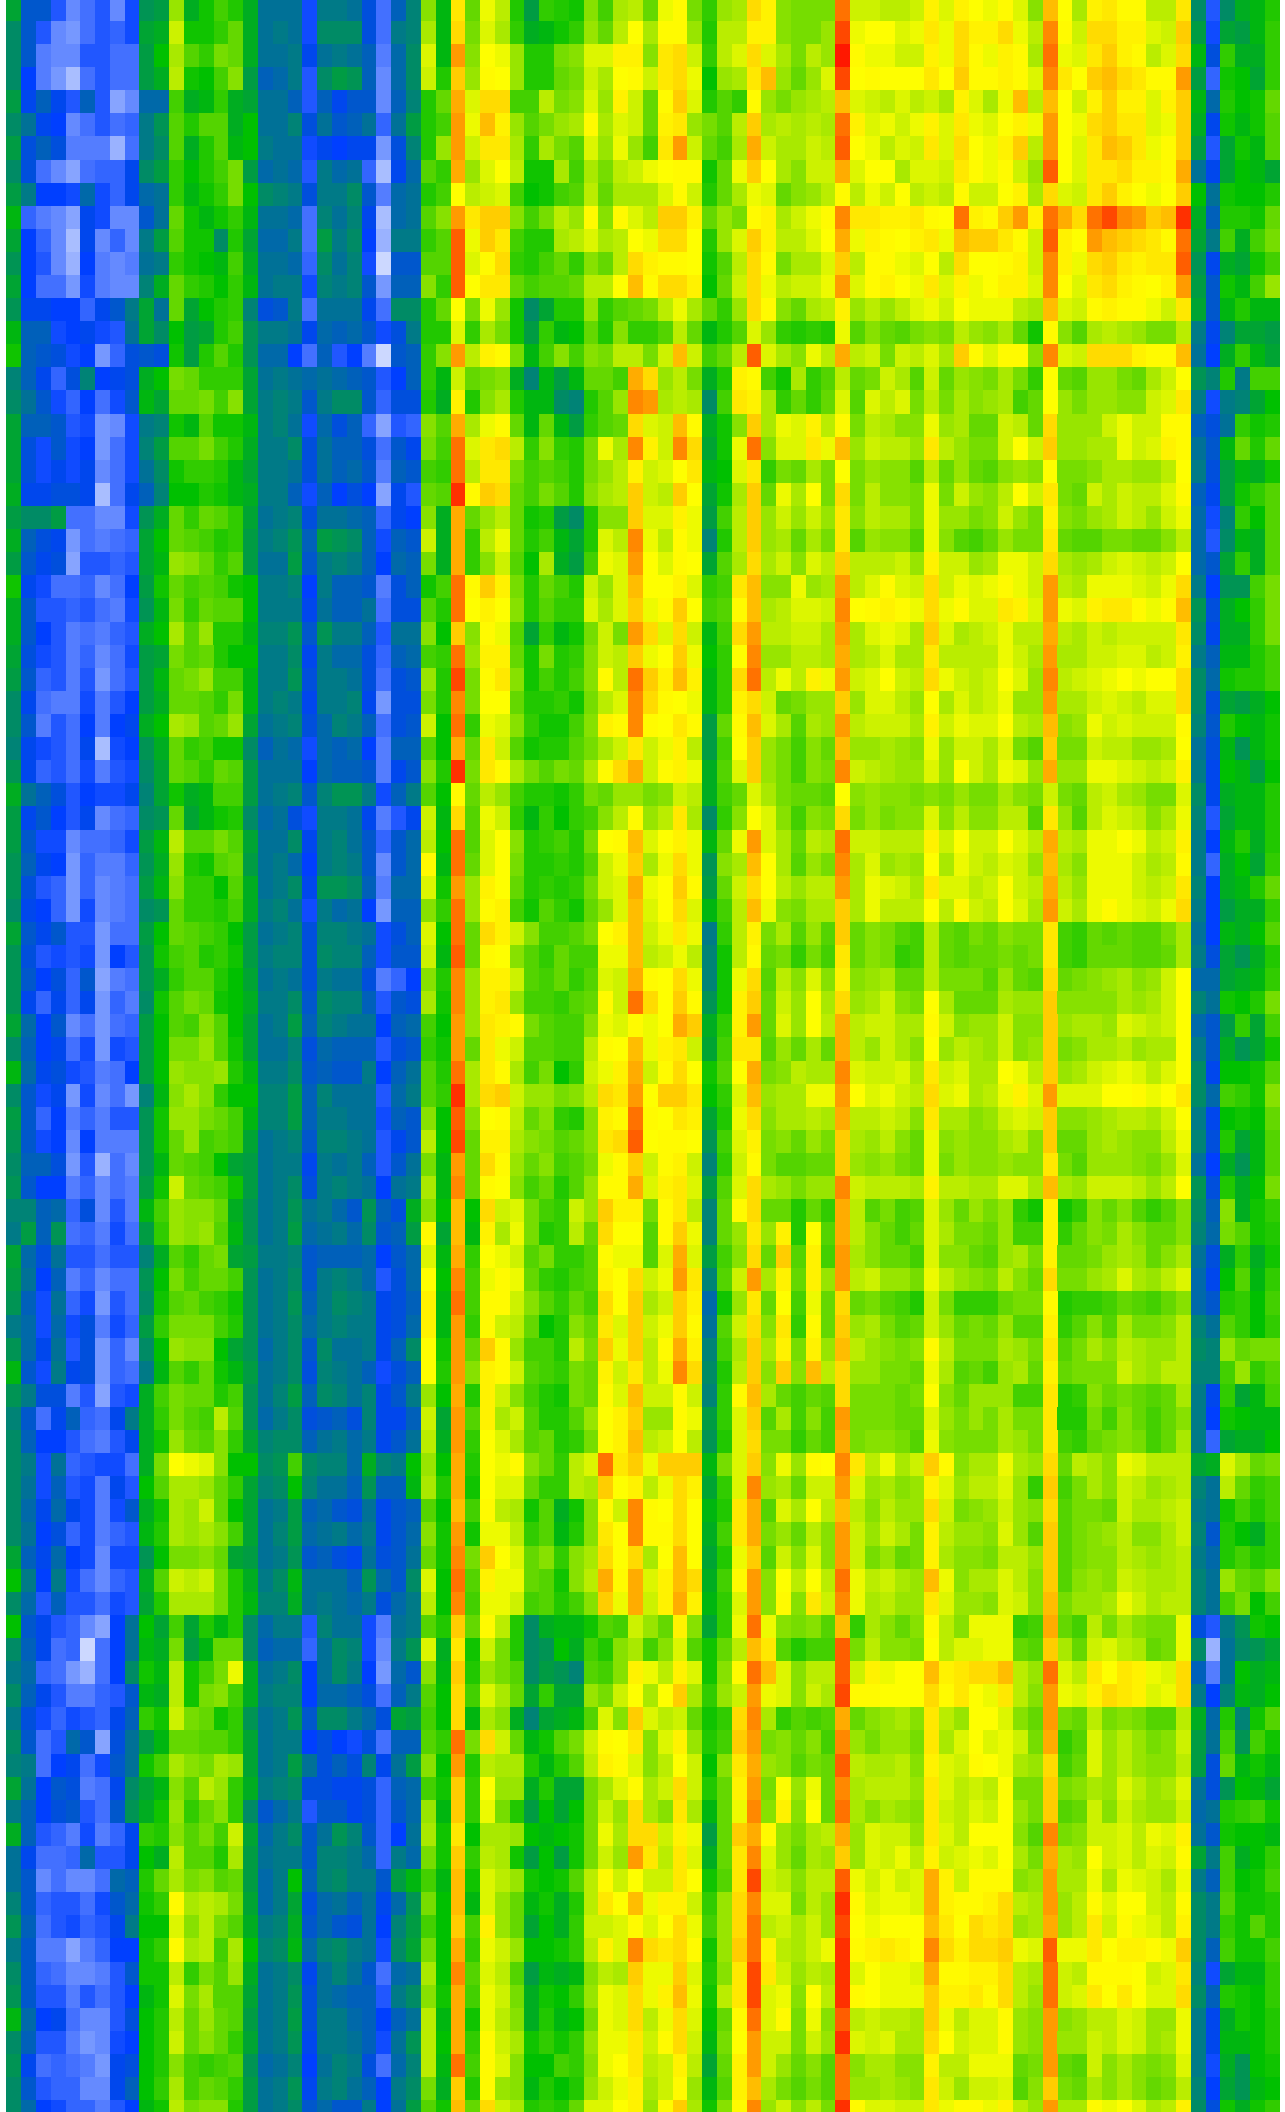

At1g77050  
At3g07050  
At5g61020  
At1g04510  
At3g54980  
At5g28740  
At4g30890  
At3g51010  
At5g01110  
At3g14120  
At5g04600  
At3g20000  
At3g57150  
At2g06000  
At5g37570  
At5g11010  
At2g14460  
At4g21140  
At5g27390  
At4g02400  
At3g07770  
At2g40430  
At5g55920  
At4g04940  
At4g29510  
At2g18220  
At1g72440  
At1g13160  
At5g09840  
At5g22650  
At3g56070  
At1g80750  
At4g15770  
At3g57000  
At5g14770  
At1g75200  
At3g09720  
At4g01560  
At3g18600  
At5g06550  
At5g52380  
At5g62440  
At1g61570  
At5g62440  
At4g25340  
At5g15750  
At5g54910  
At3g12270  
At3g06530  
At2g38000  
At1g18850  
At3g21540  
At1g75670  
At1g15420  
At2g18900  
At1g60850  
At1g15440  
At2g44860  
At5g15550  
At1g60080  
At5g48240  
At2g21440  
At3g57940  
At2g03670  
At5g26180  
At5g38720  
At2g34260  
At5g12220  
At1g69070  
At3g16810  
At3g58660  
At3g56150  
At5g10010  
At1g71850  
At3g59670  
At1g31970  
At3g43590  
At3g49240  
At3g49990  
At3g09890  
At3g25940  
At5g41190  
At5g60990  
At5g65900  
At2g28600  
At5g61770  
At5g57280  
At5g11240  
At4g05410  
At5g14050  
At2g47980  
At3g01160

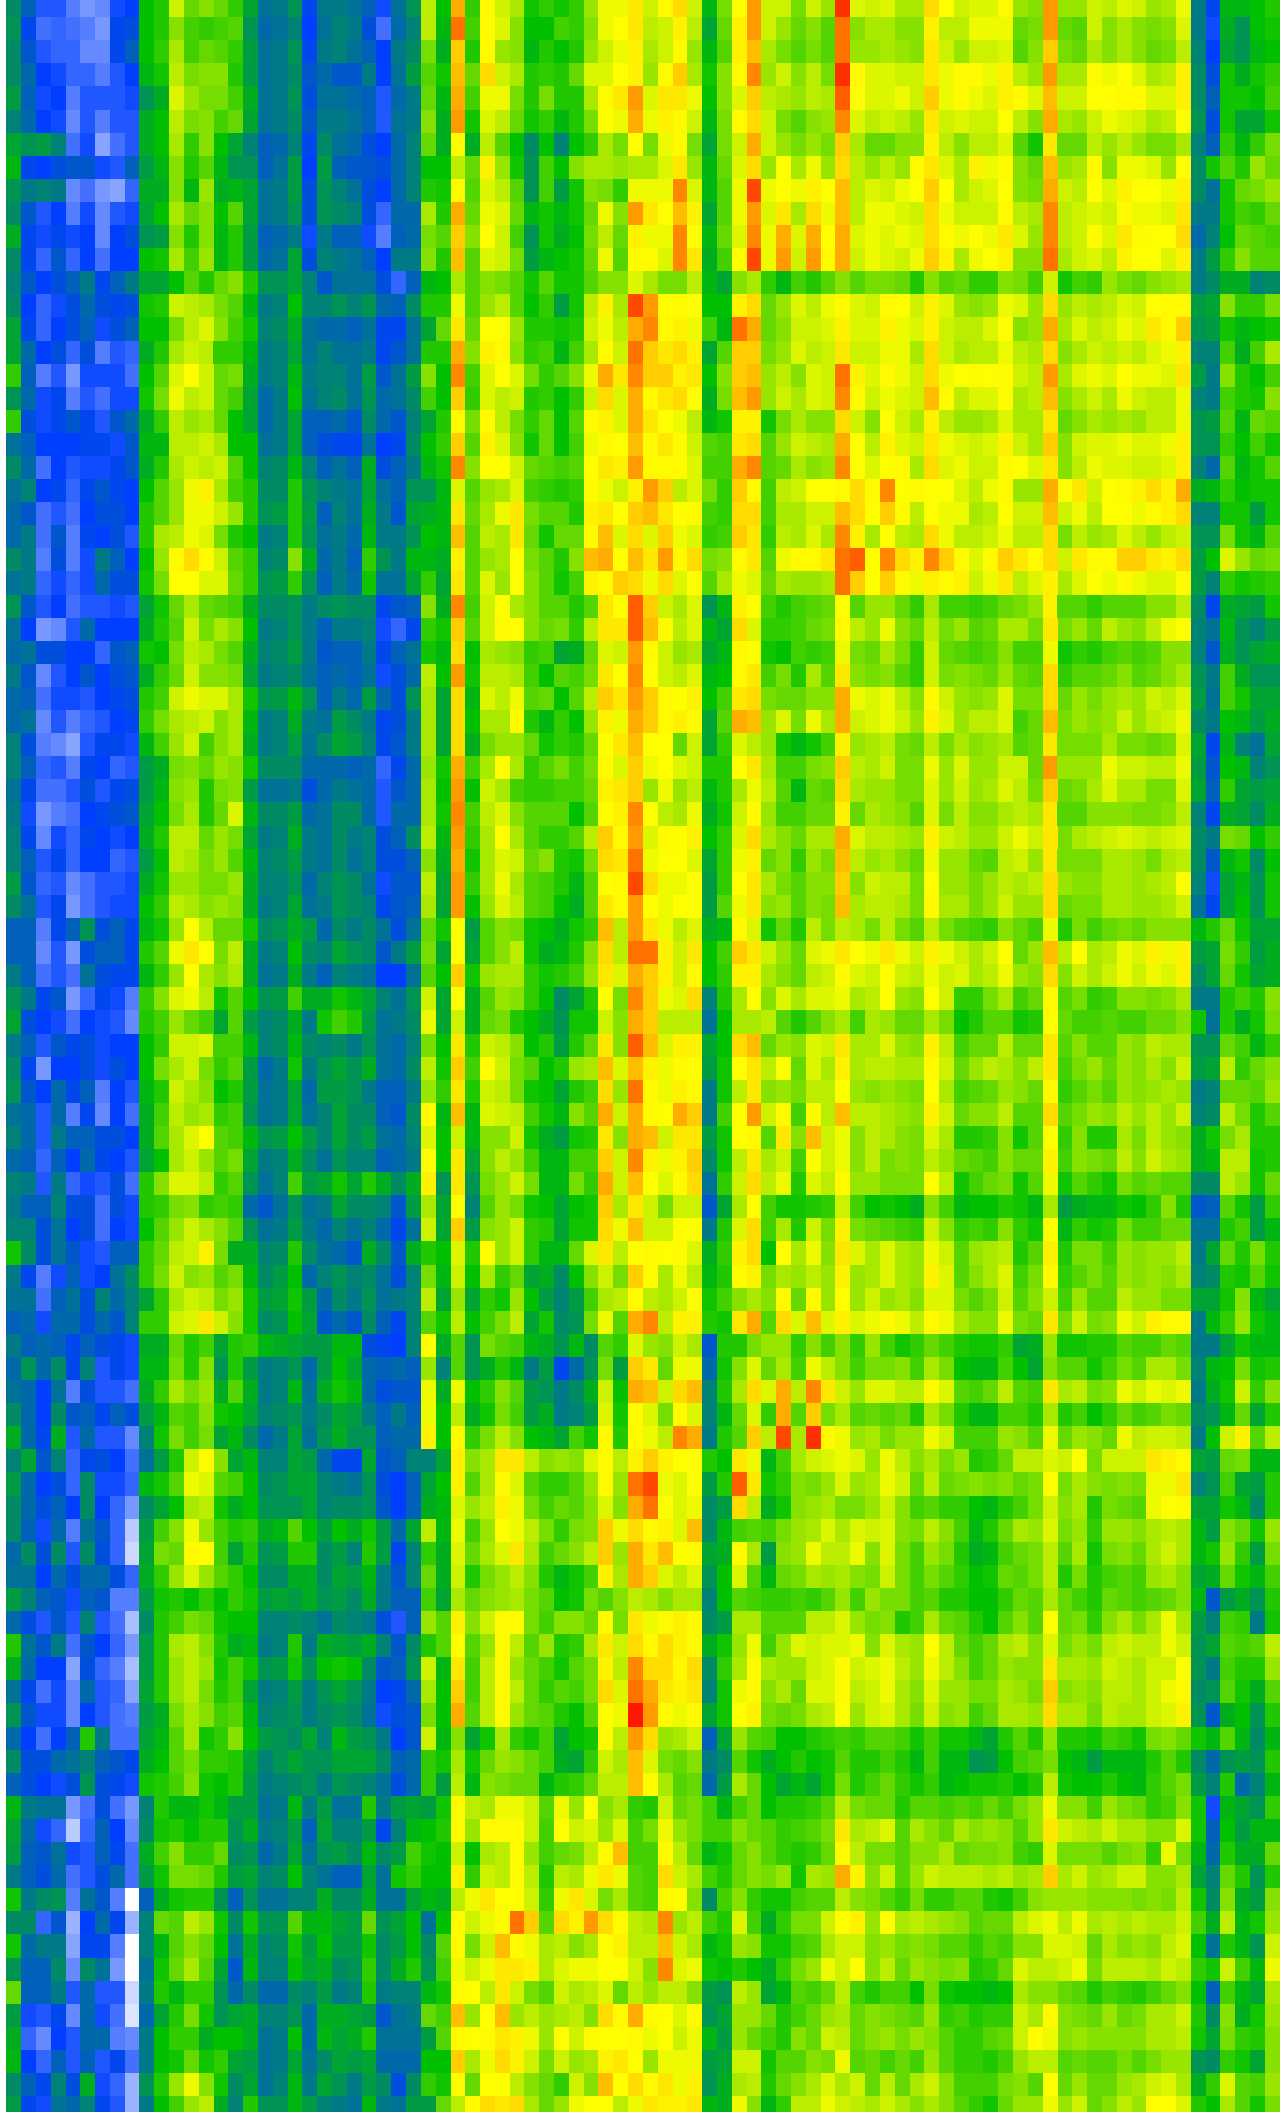

At4g06410  
At5g14050  
At2g47980  
At3g01160  
At3g55510  
At3g23620  
At4g31790  
At1g59600  
At4g36680  
At1g52930  
At3g49180  
At5g24840  
At1g06150  
At5g39900  
At3g09700  
At2g19385  
At3g61620  
At3g15080  
At3g02490  
At4g01990  
At4g13750  
At4g27660  
At1g61990  
At1g71430  
At5g13480  
At5g66960  
At3g12860  
At1g16740  
At1g06380  
At1g15250  
At3g48250  
At2g45710  
At2g15000  
At1g27390  
At1g74560  
At2g45730  
At1g73240  
At3g15460  
At1g79140  
At1g30960  
At5g61220  
At1g70350  
At5g64650  
At5g60730  
At3g08980  
At2g44510  
At1g59760  
At5g40530  
At1g63780  
At5g18920  
At1g49400  
At4g15850  
At3g25545  
At5g38890  
At2g39120  
At3g22670  
At2g38720  
At1g69370  
At2g45060  
At5g20180  
At1g49410  
At5g51220  
At2g45240  
At4g17950  
At1g26470  
At1g04070  
At5g19020  
At3g02190  
At1g26530  
At3g08820  
At3g22630  
At5g05920  
At1g08220  
At4g39300  
At5g02050  
At1g14990  
At1g74700  
At5g41680  
At1g53490  
At1g32760  
At3g20490  
At1g66740  
At2g19270  
At1g27960  
At4g00170  
At3g27310  
At5g09330  
At2g19080  
At5g43710  
At1g55870  
At3g57360  
At5g49000

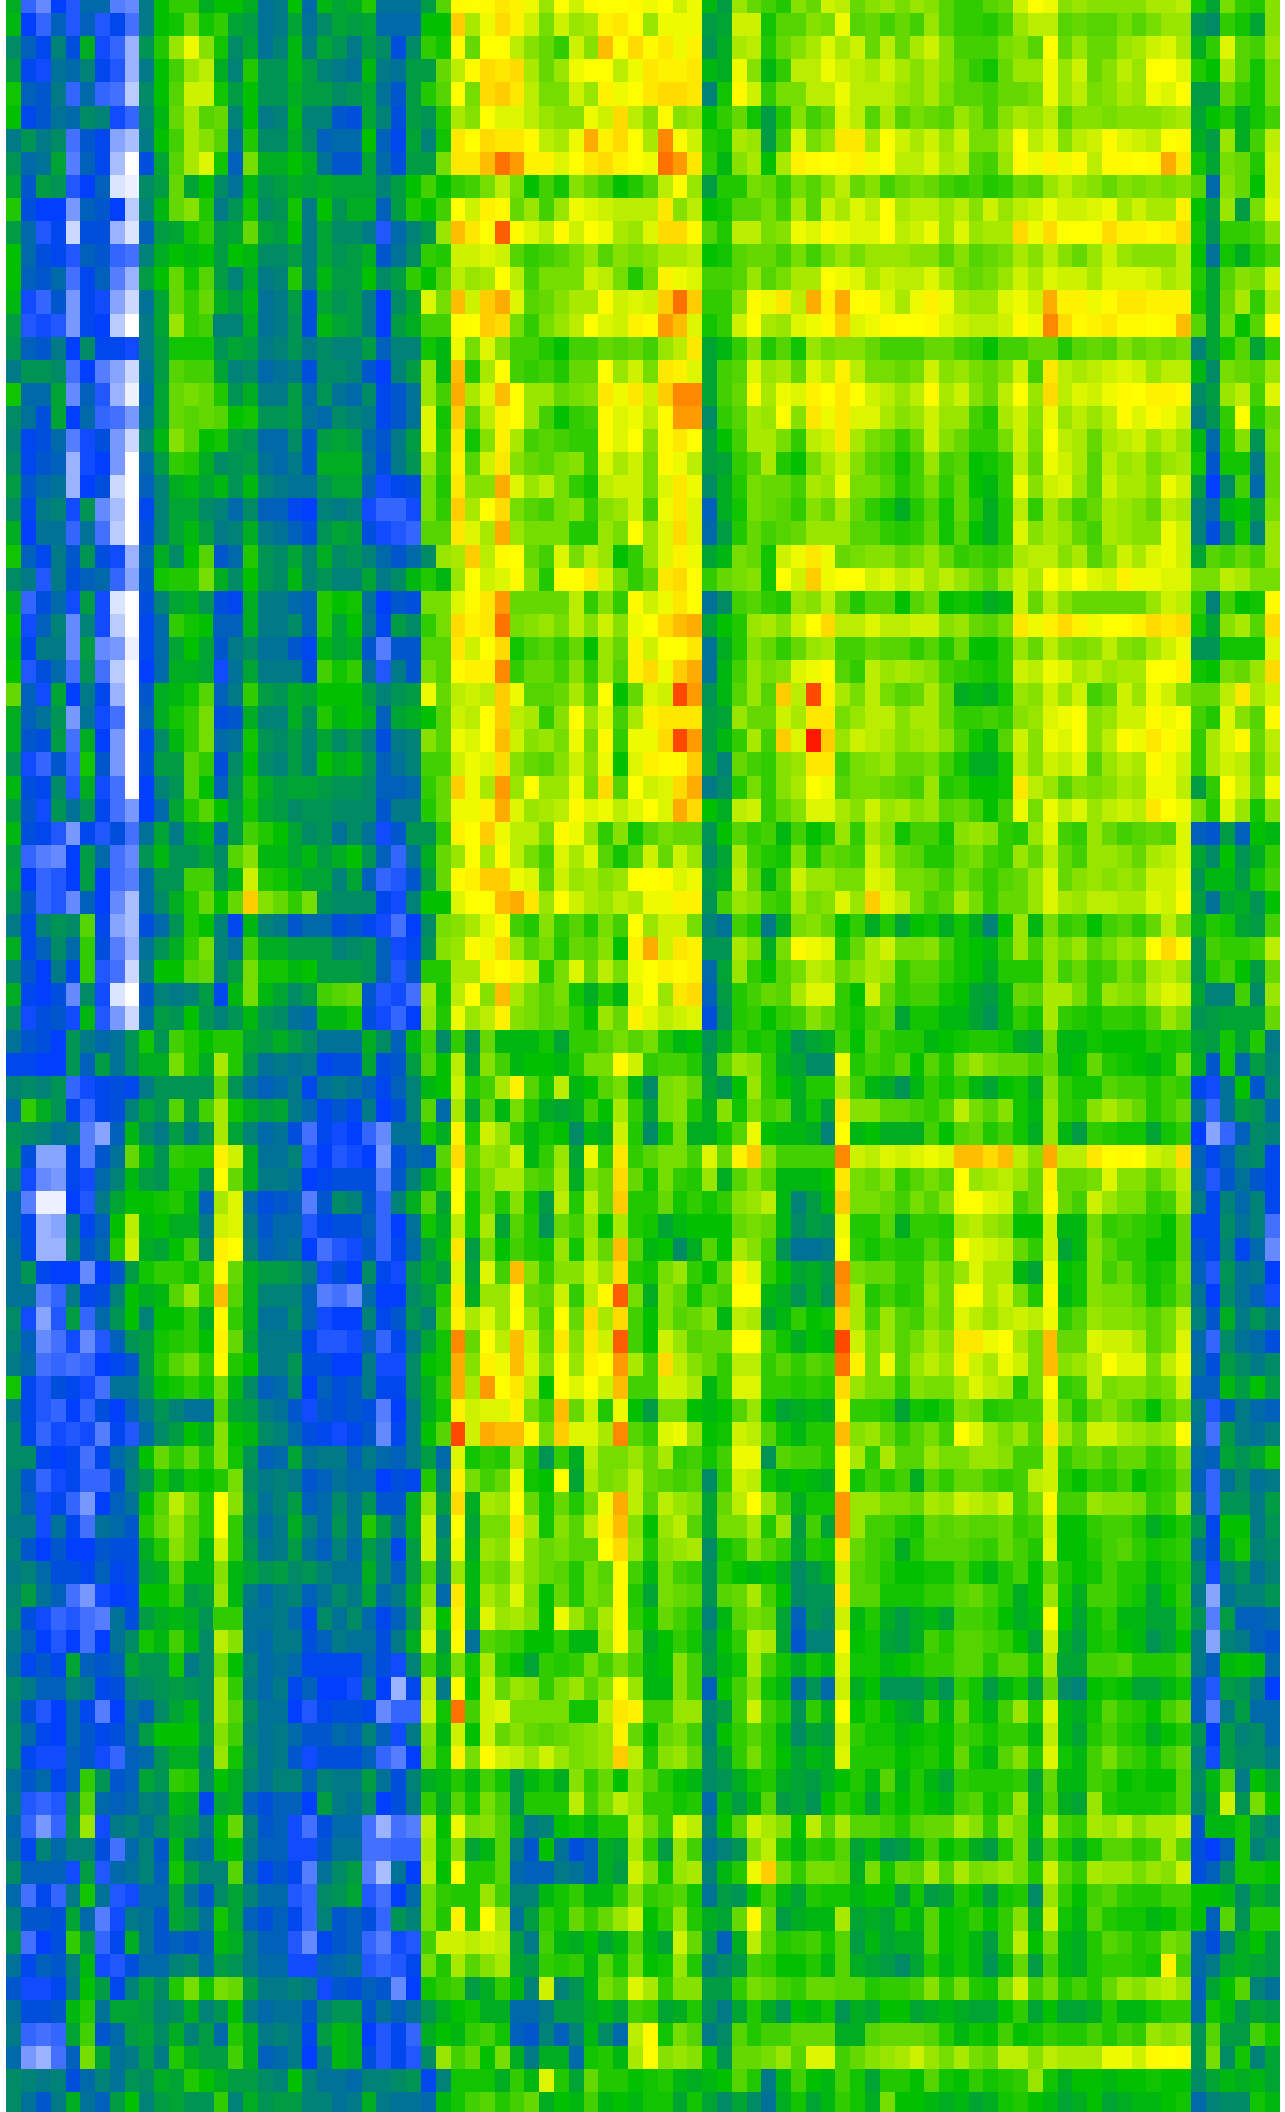

At3g43710  
At1g55870  
At3g57360  
At5g49000  
At5g18420  
At3g20480  
At1g17070  
At2g06510  
At1g78920  
At3g13440  
At1g22800  
At4g22760  
At3g05040  
At5g14250  
At4g25320  
At1g01940  
At4g31580  
At3g17910  
At5g11900  
At1g20200  
At4g24820  
At4g38630  
At5g42790  
At5g23540  
At5g10980  
At2g22270  
At1g04850  
At5g12290  
At3g03420  
At5g56500  
At3g17820  
At1g66680  
At5g20570  
At5g58640  
At3g05530  
At5g40270  
At4g31290  
At1g32260  
At3g13845  
At5g57300  
At5g45010  
At3g15420  
At5g53650  
At2g27730  
At3g62810  
At4g19900  
At2g40570  
At5g42960  
At2g40240  
At4g38710  
At1g28530  
At5g05630  
At2g16800  
At2g40760  
At1g73090  
At5g64150  
At3g23580  
At5g49430  
At1g72040  
At2g37020  
At5g65490  
At4g10750  
At2g38560  
At1g56070  
At3g12670  
At4g30150  
At2g40630  
At2g47300  
At1g07740  
At2g18510  
At3g20970  
At3g17970  
At3g16890  
At3g07440  
At4g32520  
At5g66500  
At5g39350  
At5g66380  
At3g57050  
At2g21290  
At3g51260  
At5g67220  
At2g23940  
At2g31660  
At3g46790  
At5g66140  
At3g07640  
At1g10330  
At3g06310  
At4g32930  
At4g28310  
At2g07680



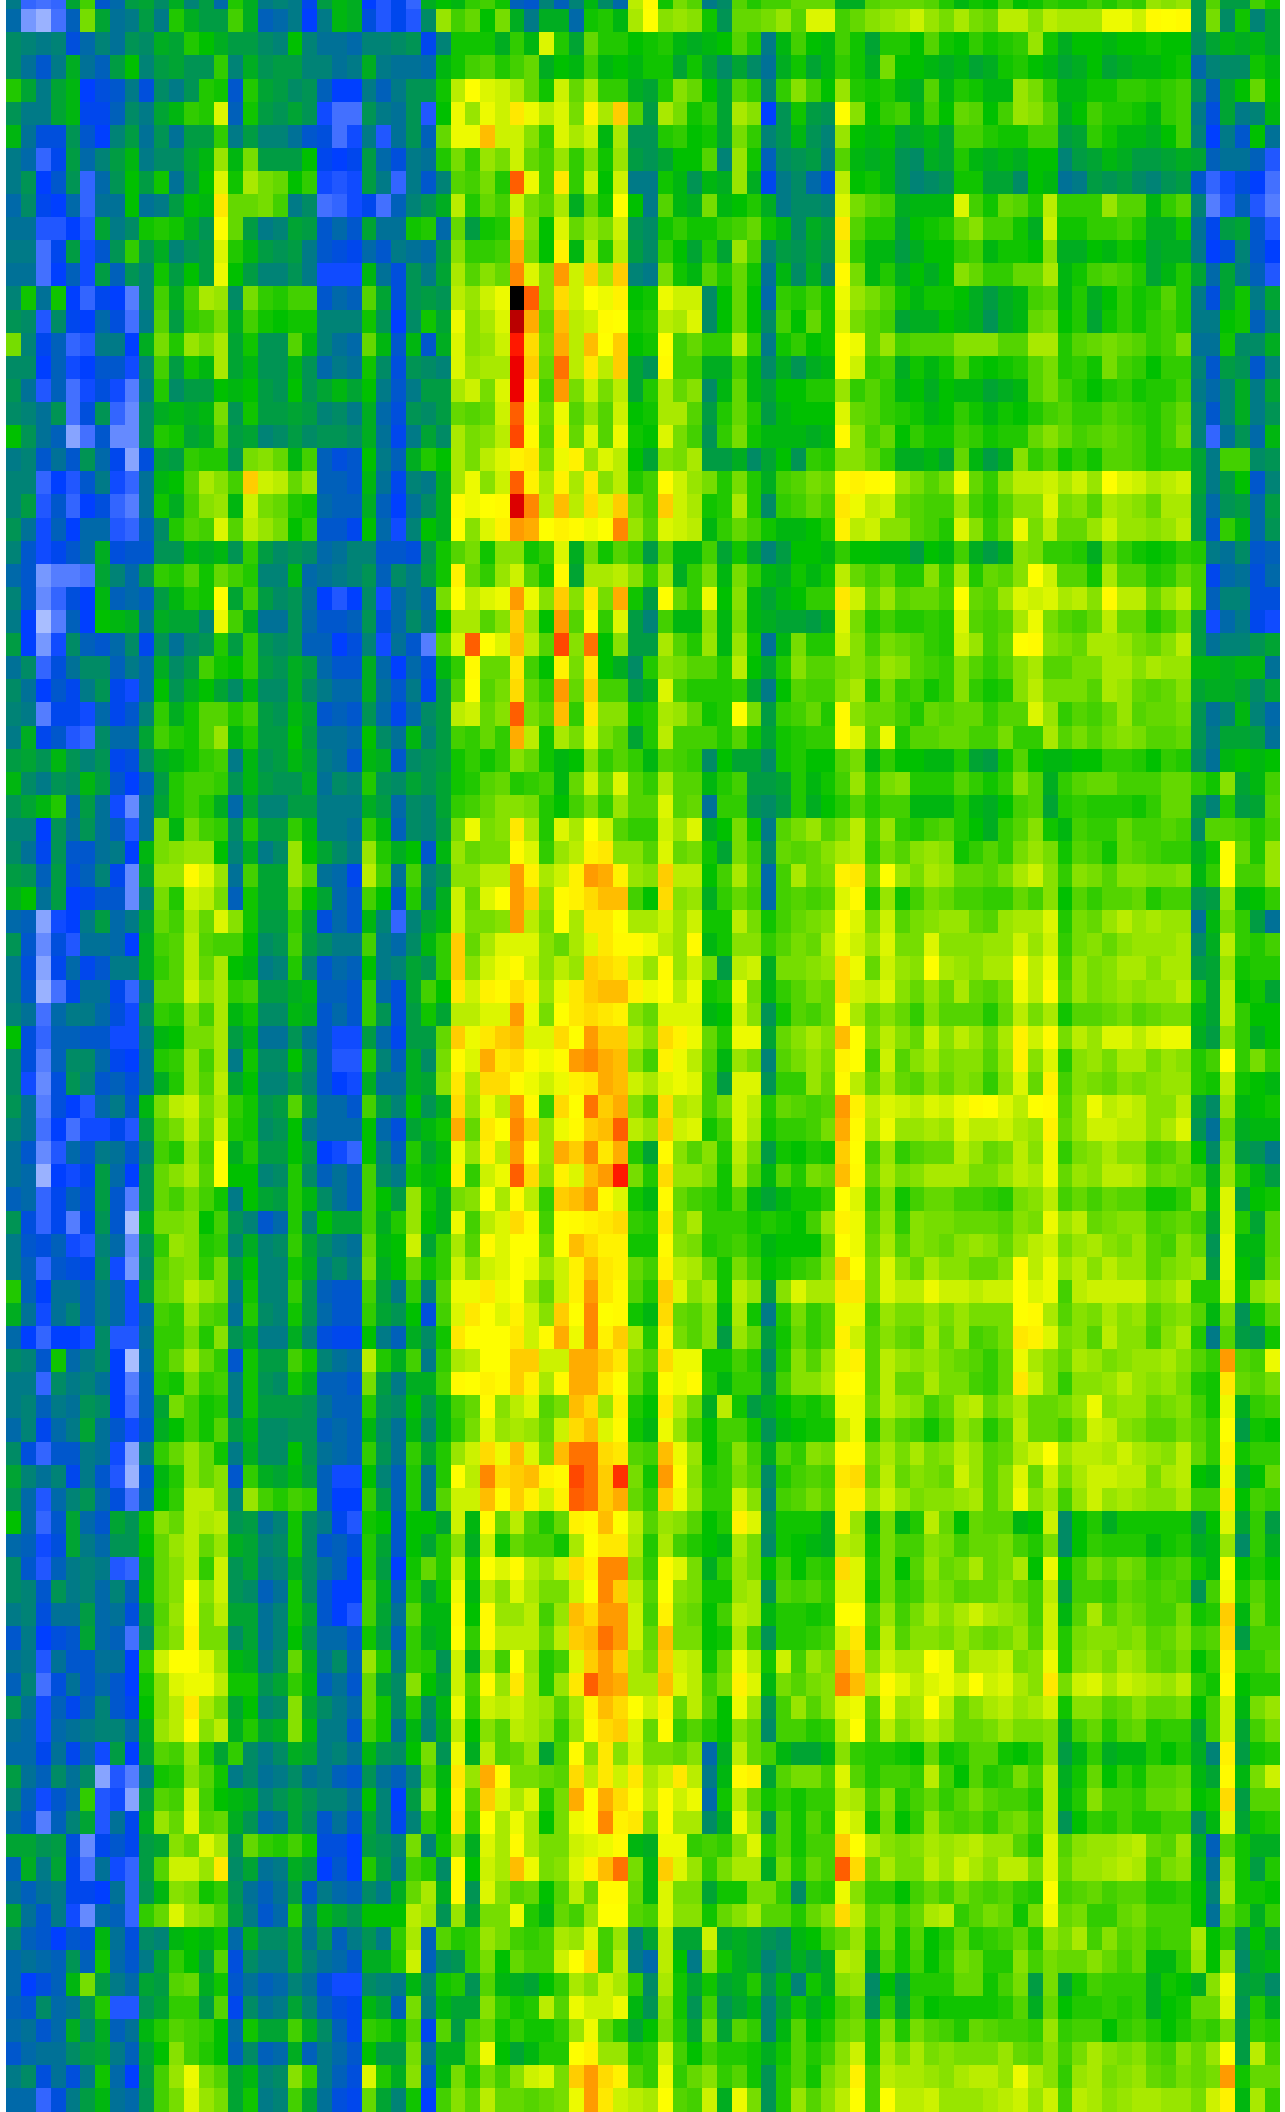

At4g32930  
At4g28310  
At2g07680  
At1g20670  
At1g48120  
At4g30570  
At3g57810  
At5g65890  
At2g41980  
At2g14530  
At5g53280  
At1g63240  
At5g22220  
At5g54640  
At1g58470  
At1g28360  
At3g03320  
At4g17420  
At5g01500  
At1g19680  
At4g35070  
At5g09250  
At1g04790  
At5g07990  
At5g41070  
At1g12330  
At4g28770  
At5g08430  
At5g59800  
At3g03590  
At5g64080  
At1g73020  
At1g18560  
At5g06820  
At1g27570  
At2g07773  
At5g65540  
At5g41580  
At4g36650  
At3g22900  
At2g04540  
At4g31200  
At1g18700  
At2g28240  
At2g20310  
At1g33400  
At5g16610  
At5g65180  
At5g60870  
At5g03450  
At4g17180  
At3g56850  
At3g63270  
At5g46190  
At1g55325  
At3g17450  
At5g11530  
At4g20400  
At1g50030  
At2g28290  
At3g26800  
At5g20420  
At5g14620  
At1g09320  
At2g25560  
At5g46550  
At5g38730  
At1g49350  
At1g47720  
At3g52260  
At3g21740  
At1g62010  
At1g06740  
At1g13050  
At3g03580  
At3g11450  
At5g06110  
At4g21610  
At3g05070  
At4g15020  
At1g80020  
At4g26720  
At5g35430  
At1g19480  
At1g27850  
At5g10810  
At1g75140  
At1g77080  
At3g05675  
At3g57170  
At2g27340

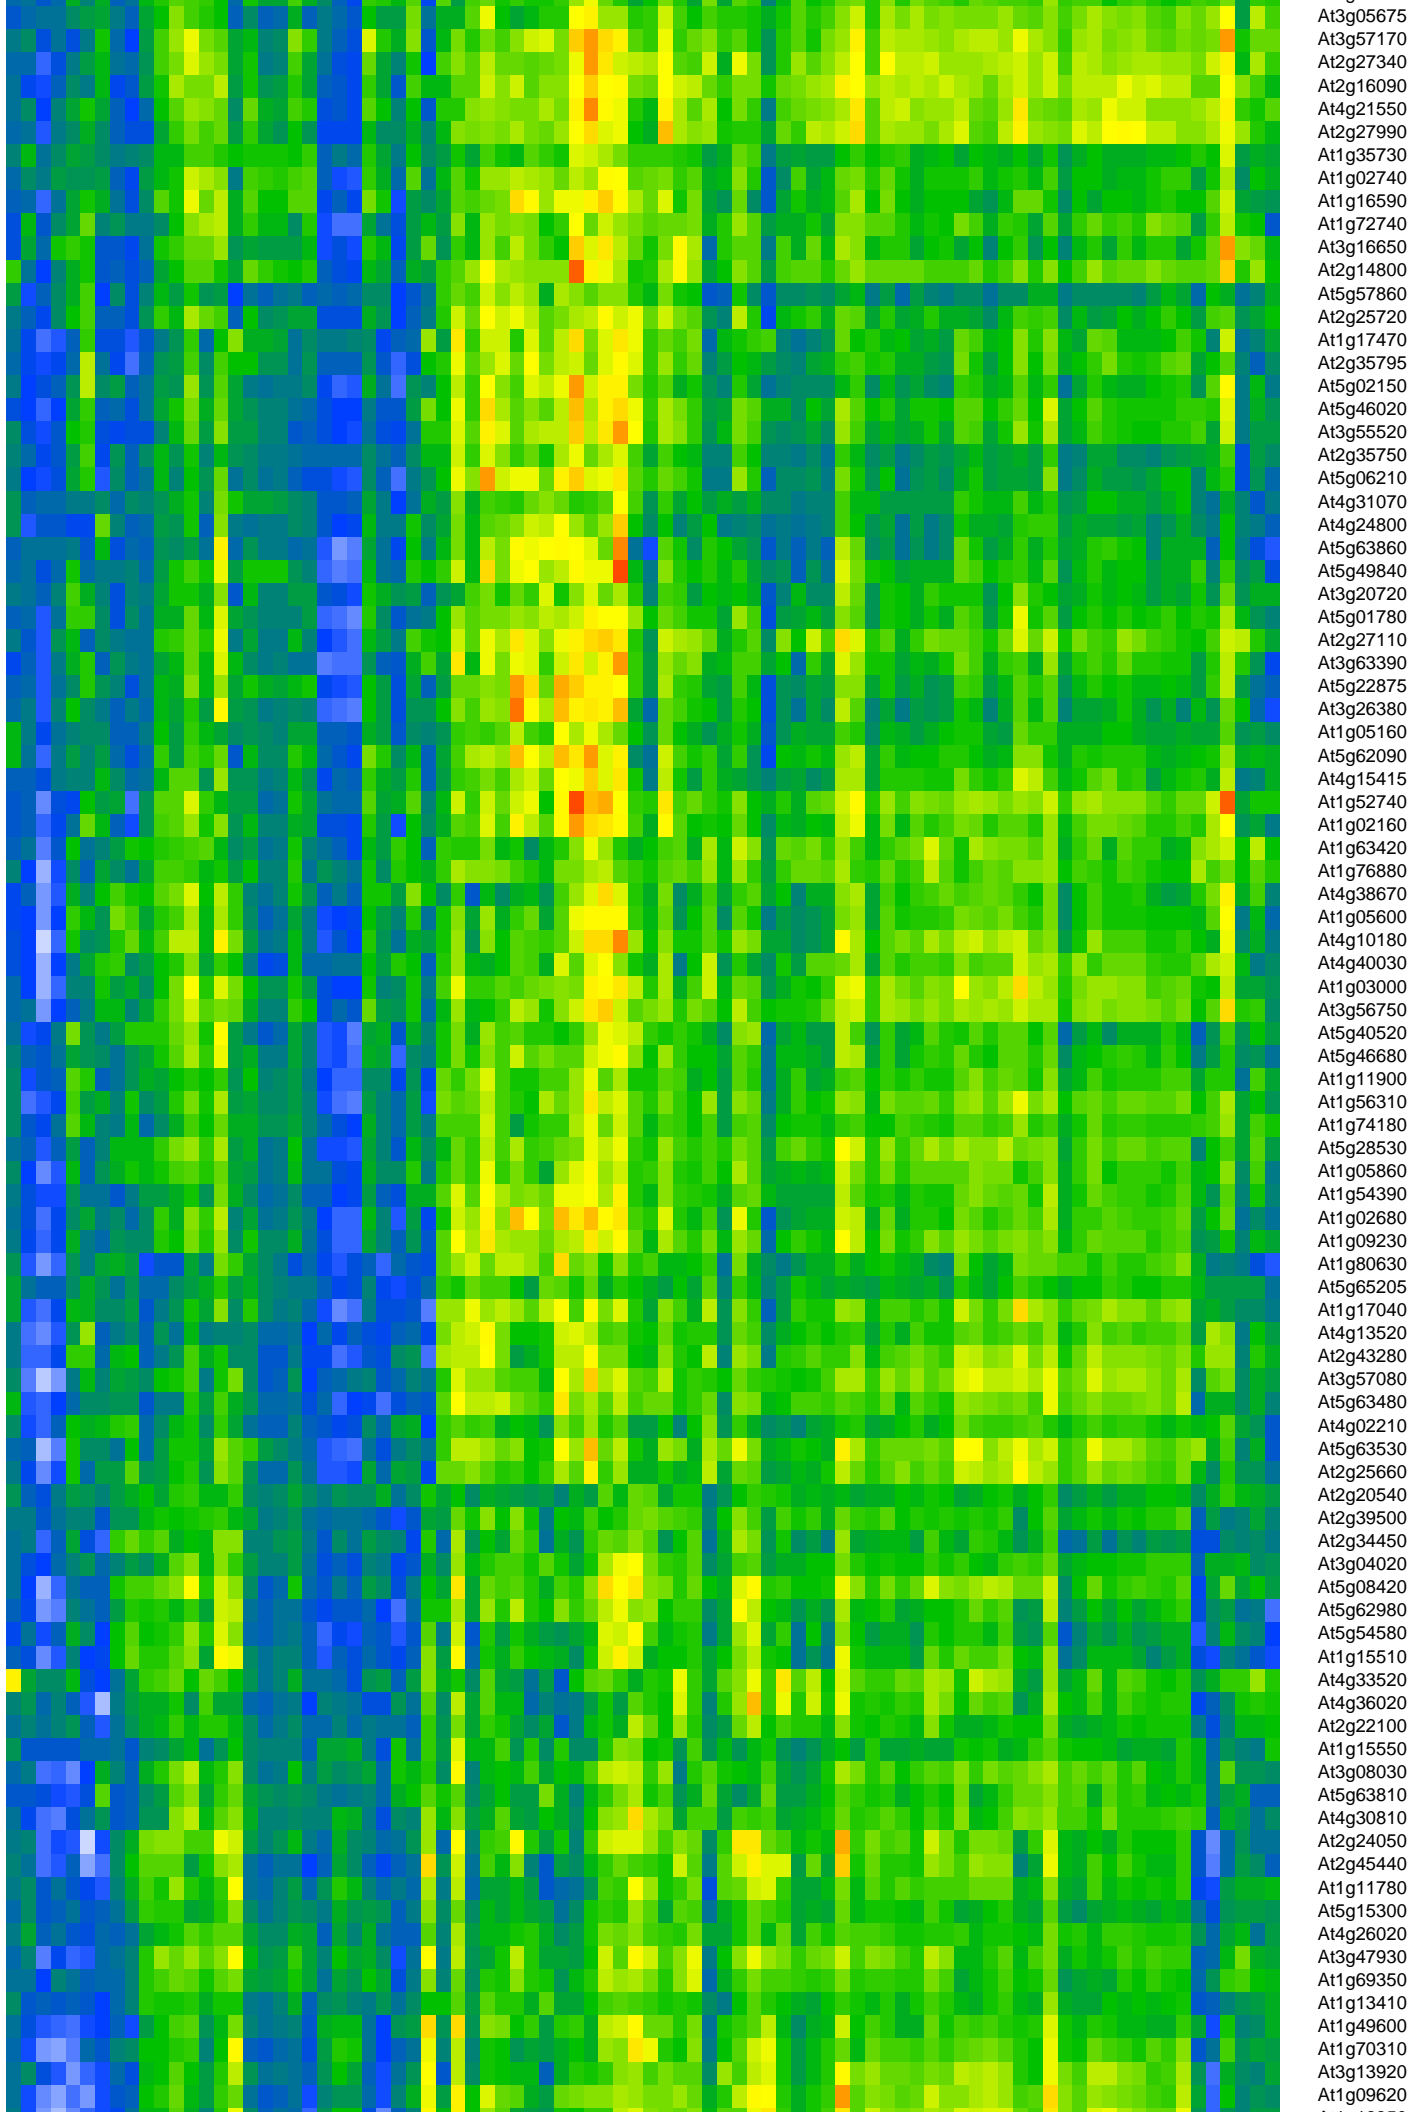

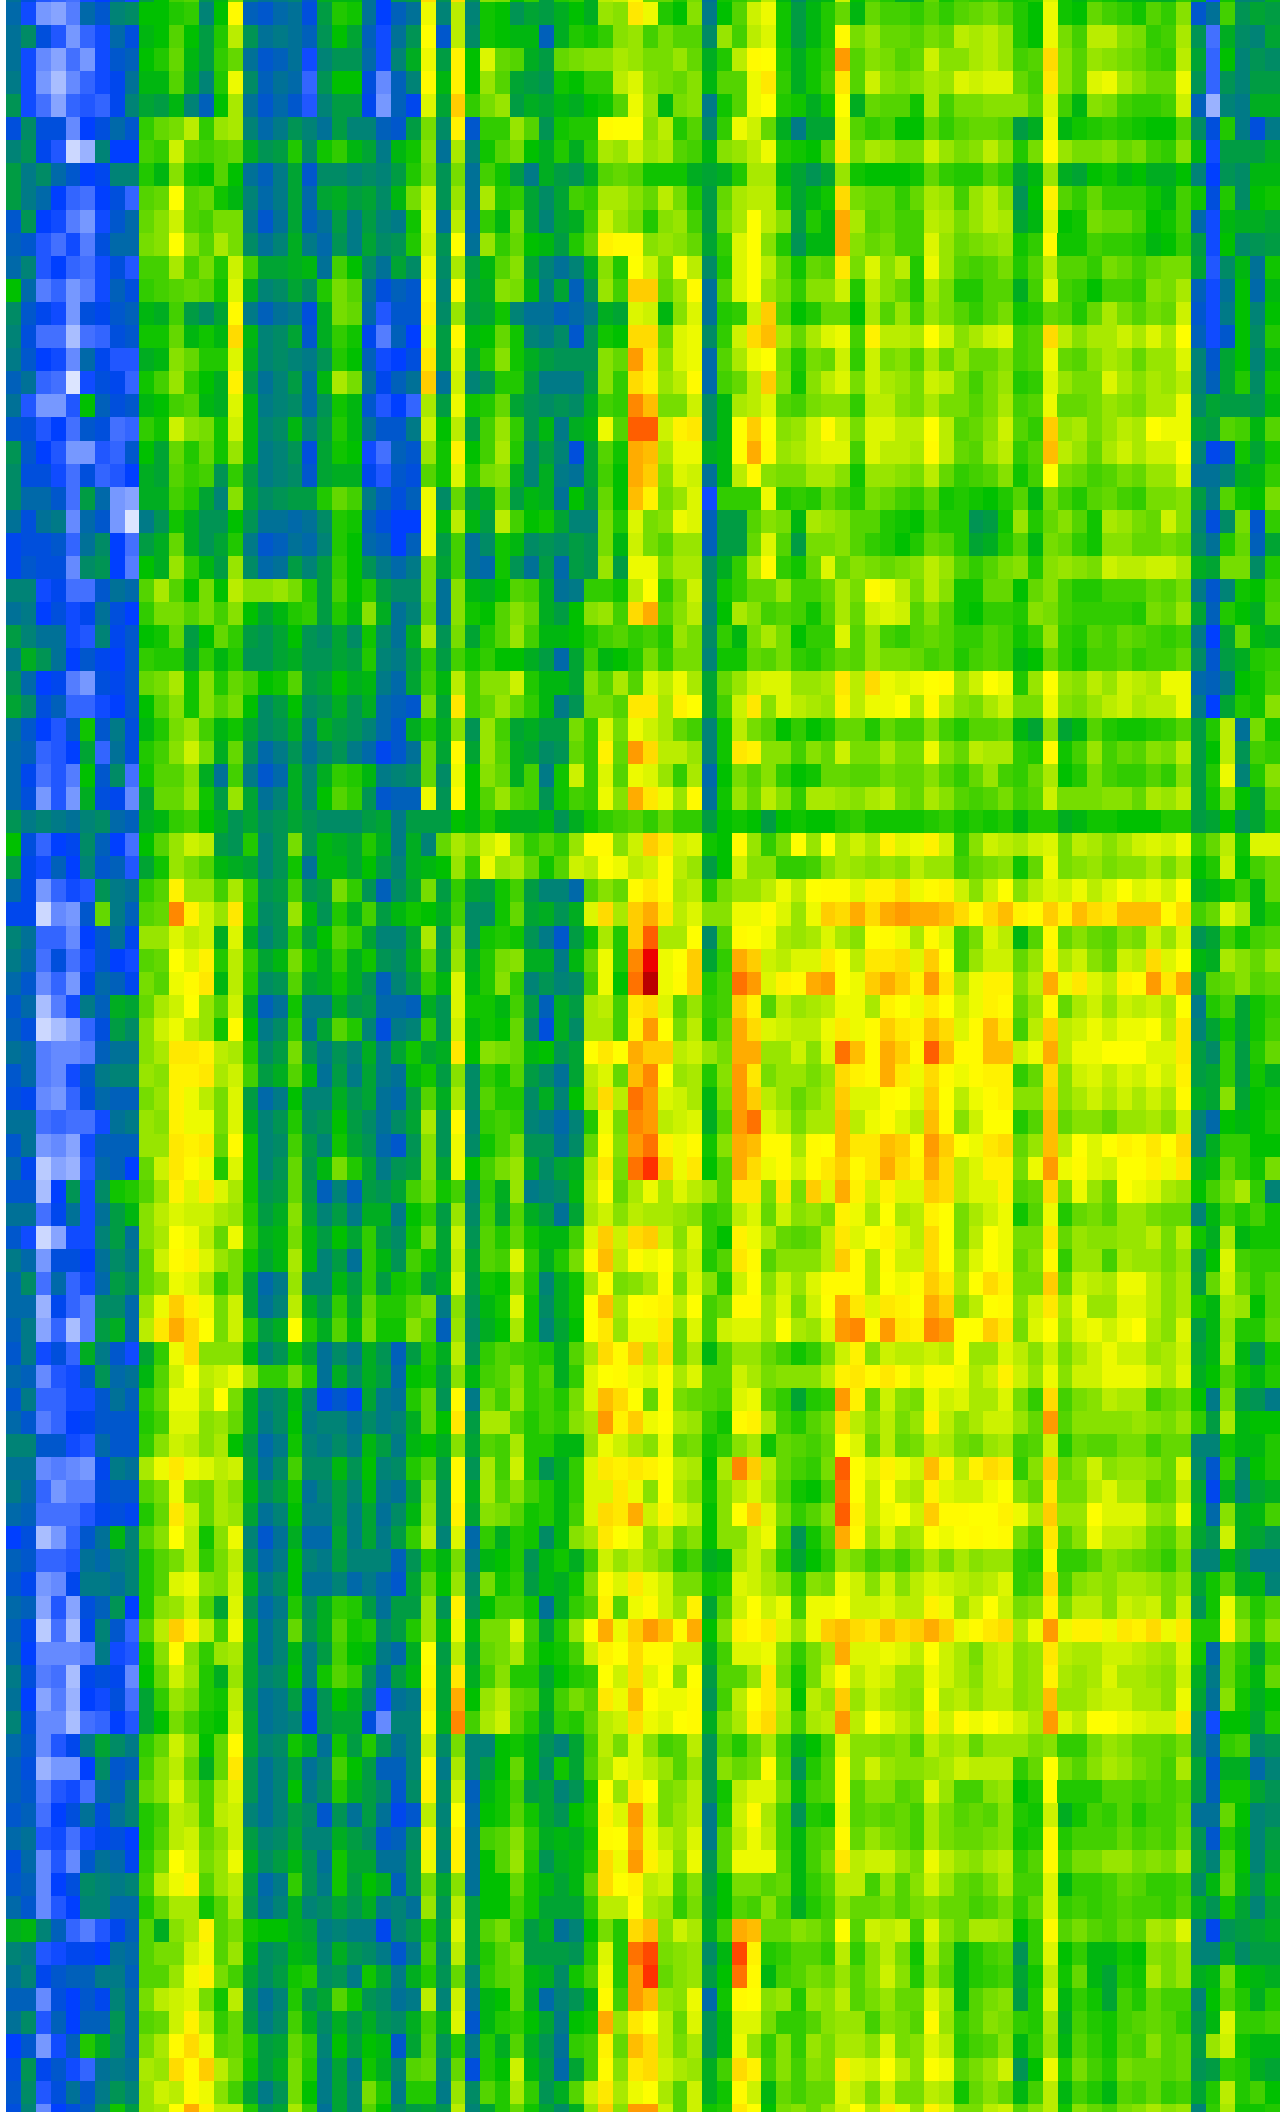

At1g70310  
At3g13920  
At1g09620  
At1g16350  
At1g29900  
At4g35490  
At1g16190  
At2g17580  
At2g19640  
At2g39020  
At1g16280  
At1g54270  
At5g15090  
At1g03860  
At5g35620  
At4g26210  
At3g03600  
At1g27435  
At3g27080  
At1g31817  
At1g23100  
At1g20770  
At4g31300  
At3g60820  
At1g21720  
At2g19380  
At1g16800  
At2g47310  
At1g61400  
At3g19210  
At3g27550  
At1g53530  
At2g19740  
At2g18110  
At1g74270  
At4g15720  
At5g64960  
At2g18410  
At1g63050  
At1g08750  
At3g04950  
At5g61970  
At5g15520  
At3g18740  
At1g77940  
At4g10620  
At4g31930  
At1g54770  
At3g04770  
At2g20585  
At4g34555  
At3g49000  
At2g22410  
At4g29910  
At5g25480  
At3g27520  
At4g37130  
At4g28990  
At5g57230  
At3g14730  
At4g38150  
At1g26520  
At4g32430  
At1g17690  
At4g04670  
At1g10490  
At3g58470  
At5g41650  
At1g64185  
At5g19500  
At2g46470  
At3g09090  
At5g49560  
At2g39990  
At3g57290  
At1g75340  
At1g33270  
At3g56430  
At1g32580  
At2g27775  
At3g12370  
At3g53220  
At5g57080  
At3g19360  
At2g32220  
At5g09380  
At5g43970  
At3g04600  
At3g47836  
At4g05440  
At2g44630  
At4g26720

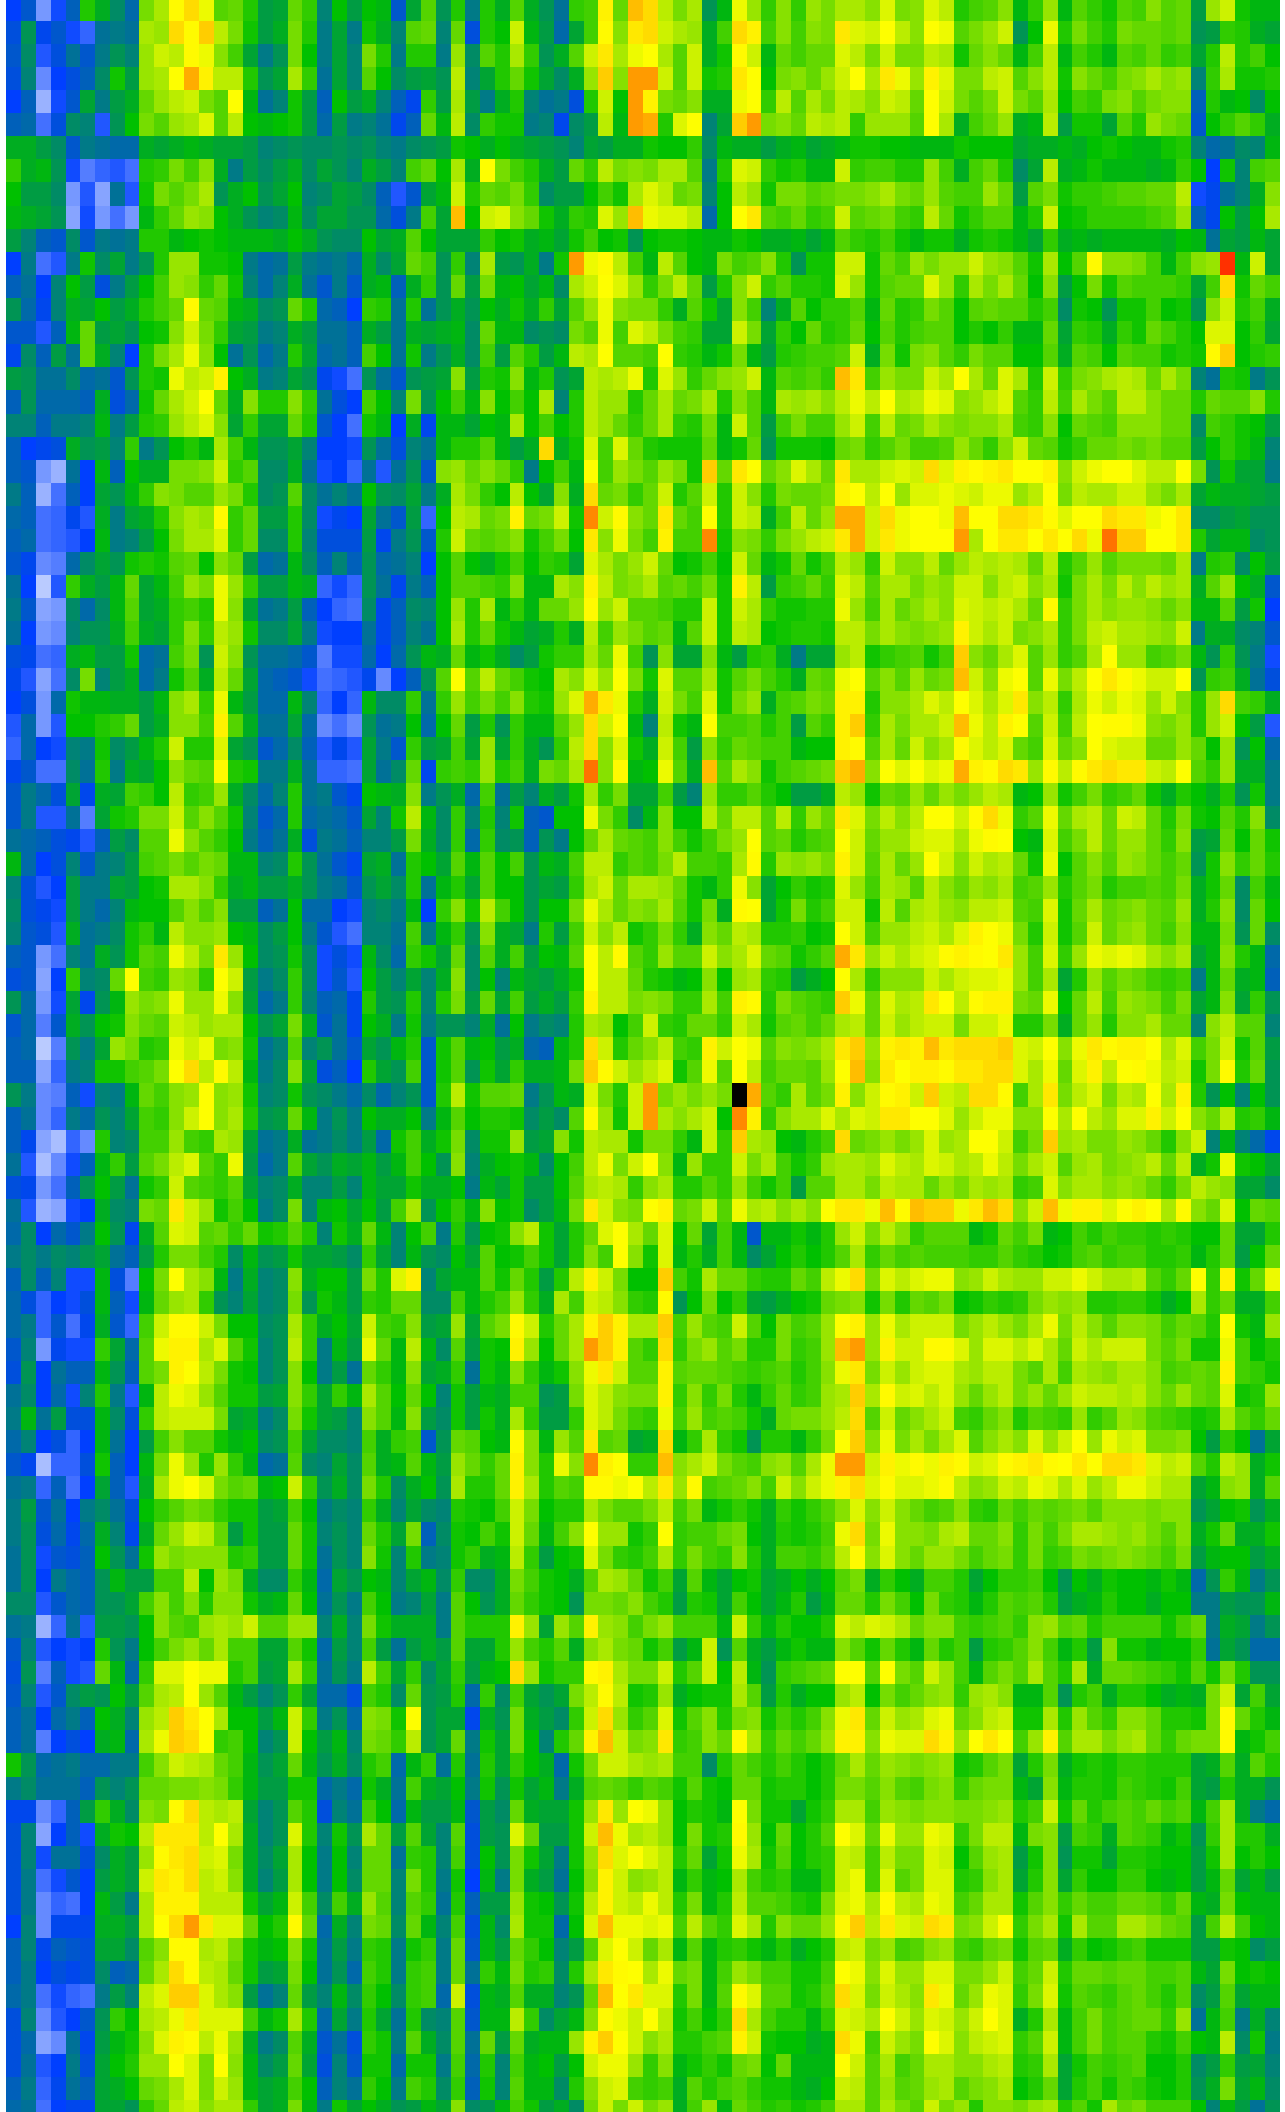

At3g47836  
At4g05440  
At2g44630  
At1g06790  
At3g07230  
At5g05990  
At3g30810  
At1g22960  
At1g66580  
At1g14060  
At5g07740  
At1g13380  
At3g47530  
At1g69020  
At1g49245  
At3g09735  
At4g39740  
At1g48360  
At4g33925  
At5g45610  
At5g51850  
At1g01840  
At1g21700  
At2g35310  
At1g18490  
At5g63520  
At2g33820  
At2g33735  
At1g60160  
At5g63670  
At1g27690  
At5g55210  
At5g05610  
At2g33500  
At1g74580  
At1g51745  
At4g37190  
At4g00980  
At2g11000  
At4g13070  
At2g41080  
At1g27410  
At3g24570  
At3g47390  
At3g48600  
At5g49230  
At3g56830  
At1g49620  
At5g23800  
At3g02600  
At4g24500  
At4g10280  
At5g17410  
At5g15360  
At5g59650  
At1g76950  
At2g15440  
At1g48380  
At4g18600  
At2g42240  
At5g36960  
At2g02150  
At5g53660  
At1g65380  
At5g23780  
At2g27250  
At2g07715  
At2g07695  
At2g22070  
At5g08490  
At1g18610  
At2g33880  
At5g27220  
At3g52210  
At5g04070  
At2g28330  
At1g74400  
At3g56550  
At5g40710  
At5g08270  
At3g49740  
At3g58520  
At3g19330  
At1g20230  
At3g62890  
At2g13600  
At3g13150  
At4g16510  
At5g63630  
At2g40720  
At2g21710  
At1g13230

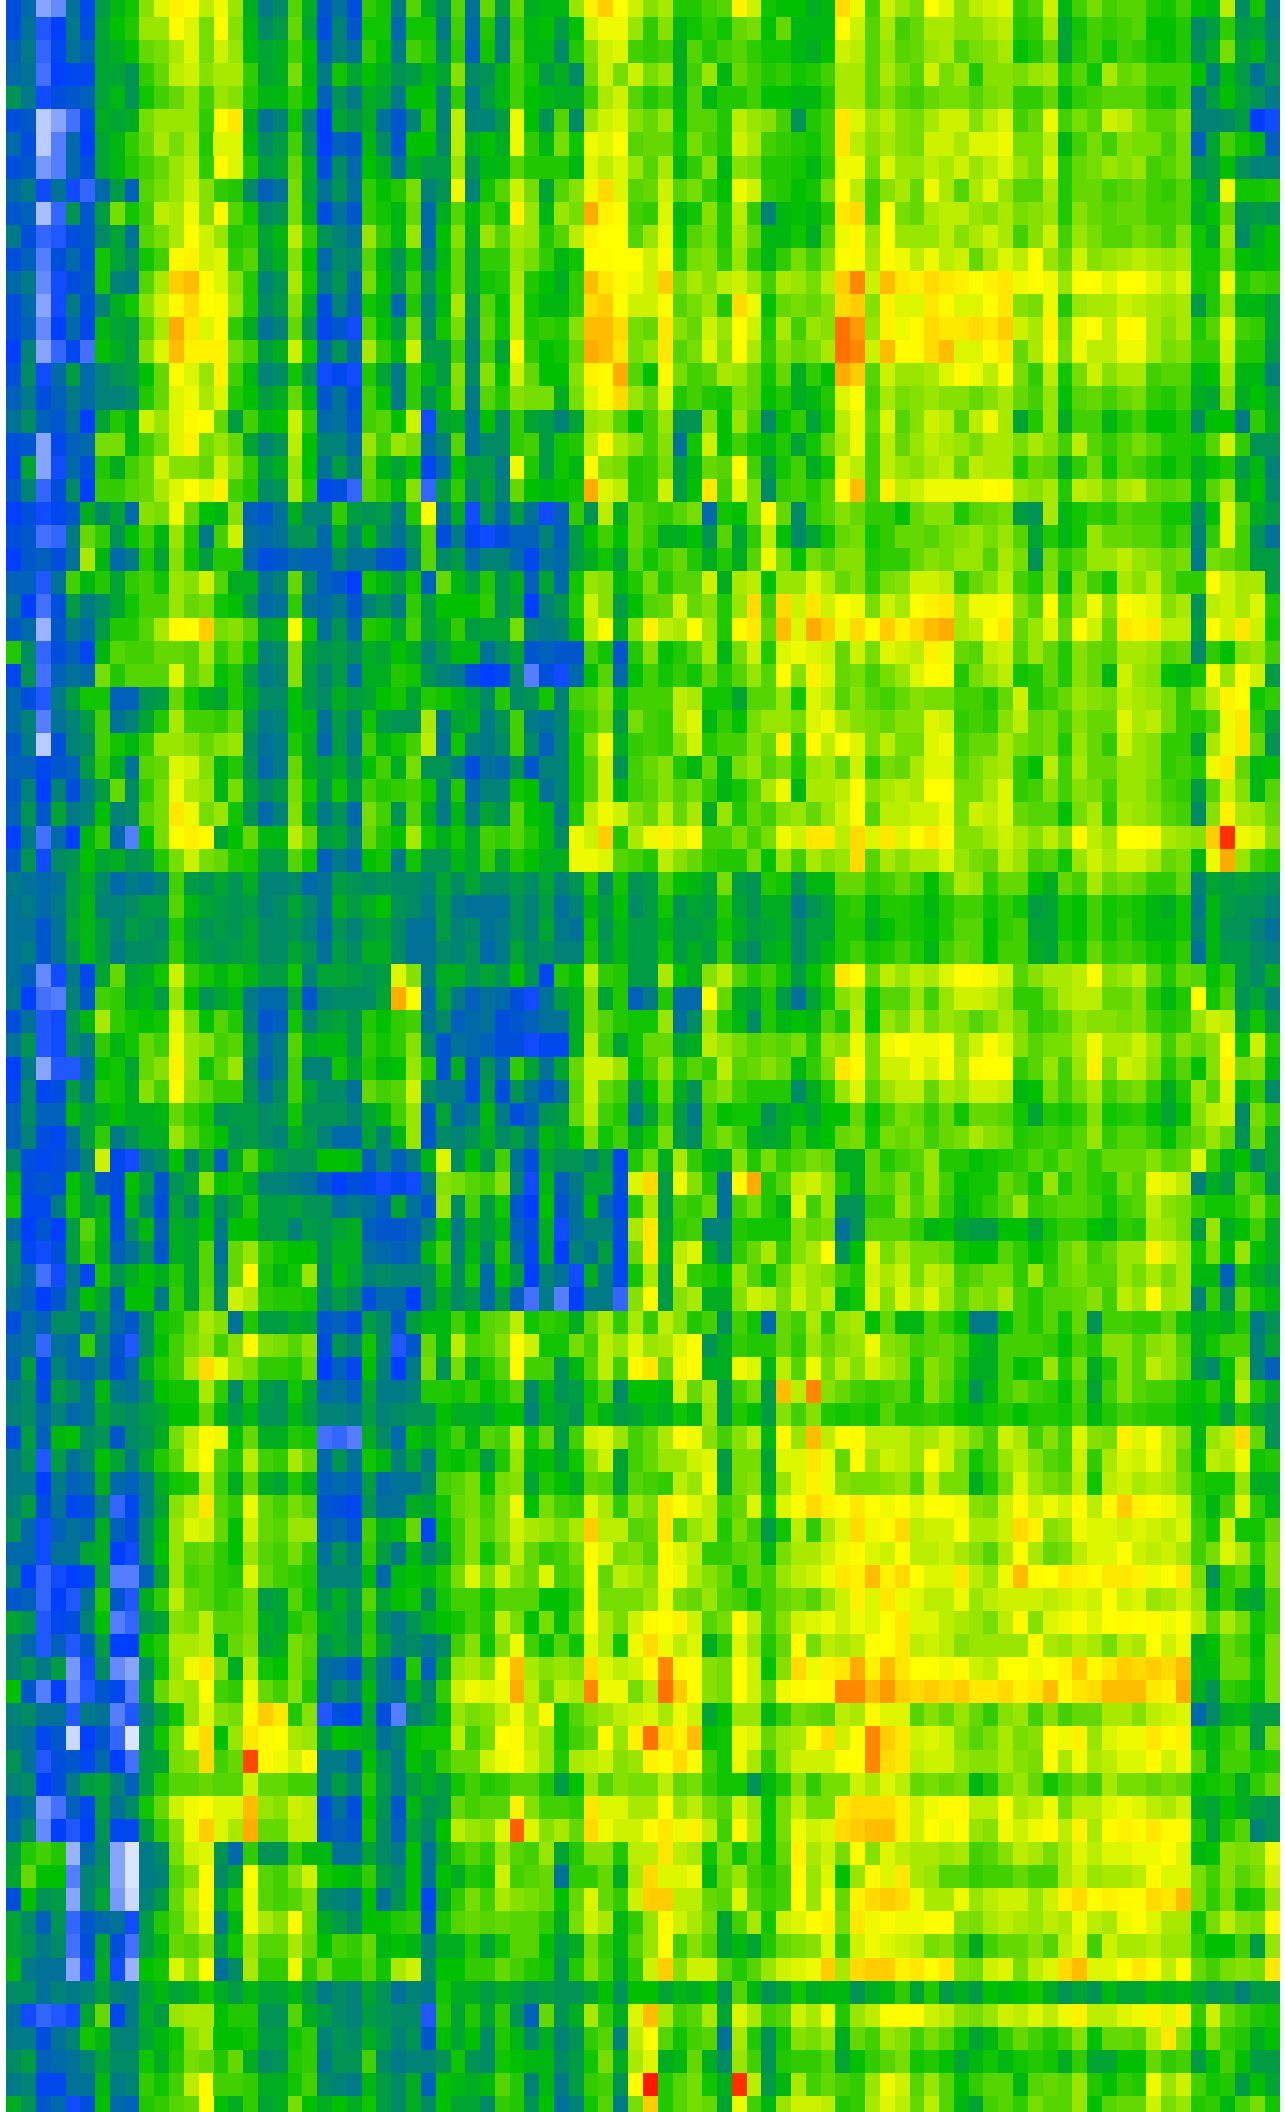

At5g63630  
At2g40720  
At2g21710  
At1g13230  
At5g13230  
At3g59840  
At1g24290  
At3g18970  
At5g02850  
At2g31450  
At4g11970  
At2g16880  
At5g14850  
At3g61360  
At2g39910  
At5g45300  
At3g21020  
At3g53360  
At1g48870  
At2g20210  
At3g26950  
At3g20070  
At4g15520  
At2g41530  
At1g48160  
At4g01510  
At1g62830  
At2g22260  
At1g23880  
At2g27130  
At5g13050  
At5g43310  
At1g51580  
At1g79070  
At1g80190  
At2g21630  
At2g45200  
At1g64260  
At4g14090  
At5g54060  
At5g17220  
At5g42800  
At4g38960  
At1g79970  
At3g07190  
At2g29510  
At3g57030  
At3g58975  
At3g51480  
At1g19170  
At5g16440  
At5g13610  
At1g50120  
At5g15770  
At5g47760  
At1g77590  
At3g50520  
At1g11800  
At1g77540  
At1g44890  
At3g46770  
At3g23770  
At1g50950  
At3g15605  
At5g21150  
At3g48440  
At5g44800  
At4g39240  
At3g61690  
At3g29130  
At5g19380  
At1g73430  
At3g10730  
At4g34340  
At1g72340  
At3g55380  
At1g59890  
At5g32460  
At4g23950  
At5g27640  
At1g13180  
At1g30300  
At2g32980  
At3g03970  
At5g06650  
At1g09000  
At3g56610  
At1g24240  
At3g61090  
At4g28130  
At3g02930  
At1g01570

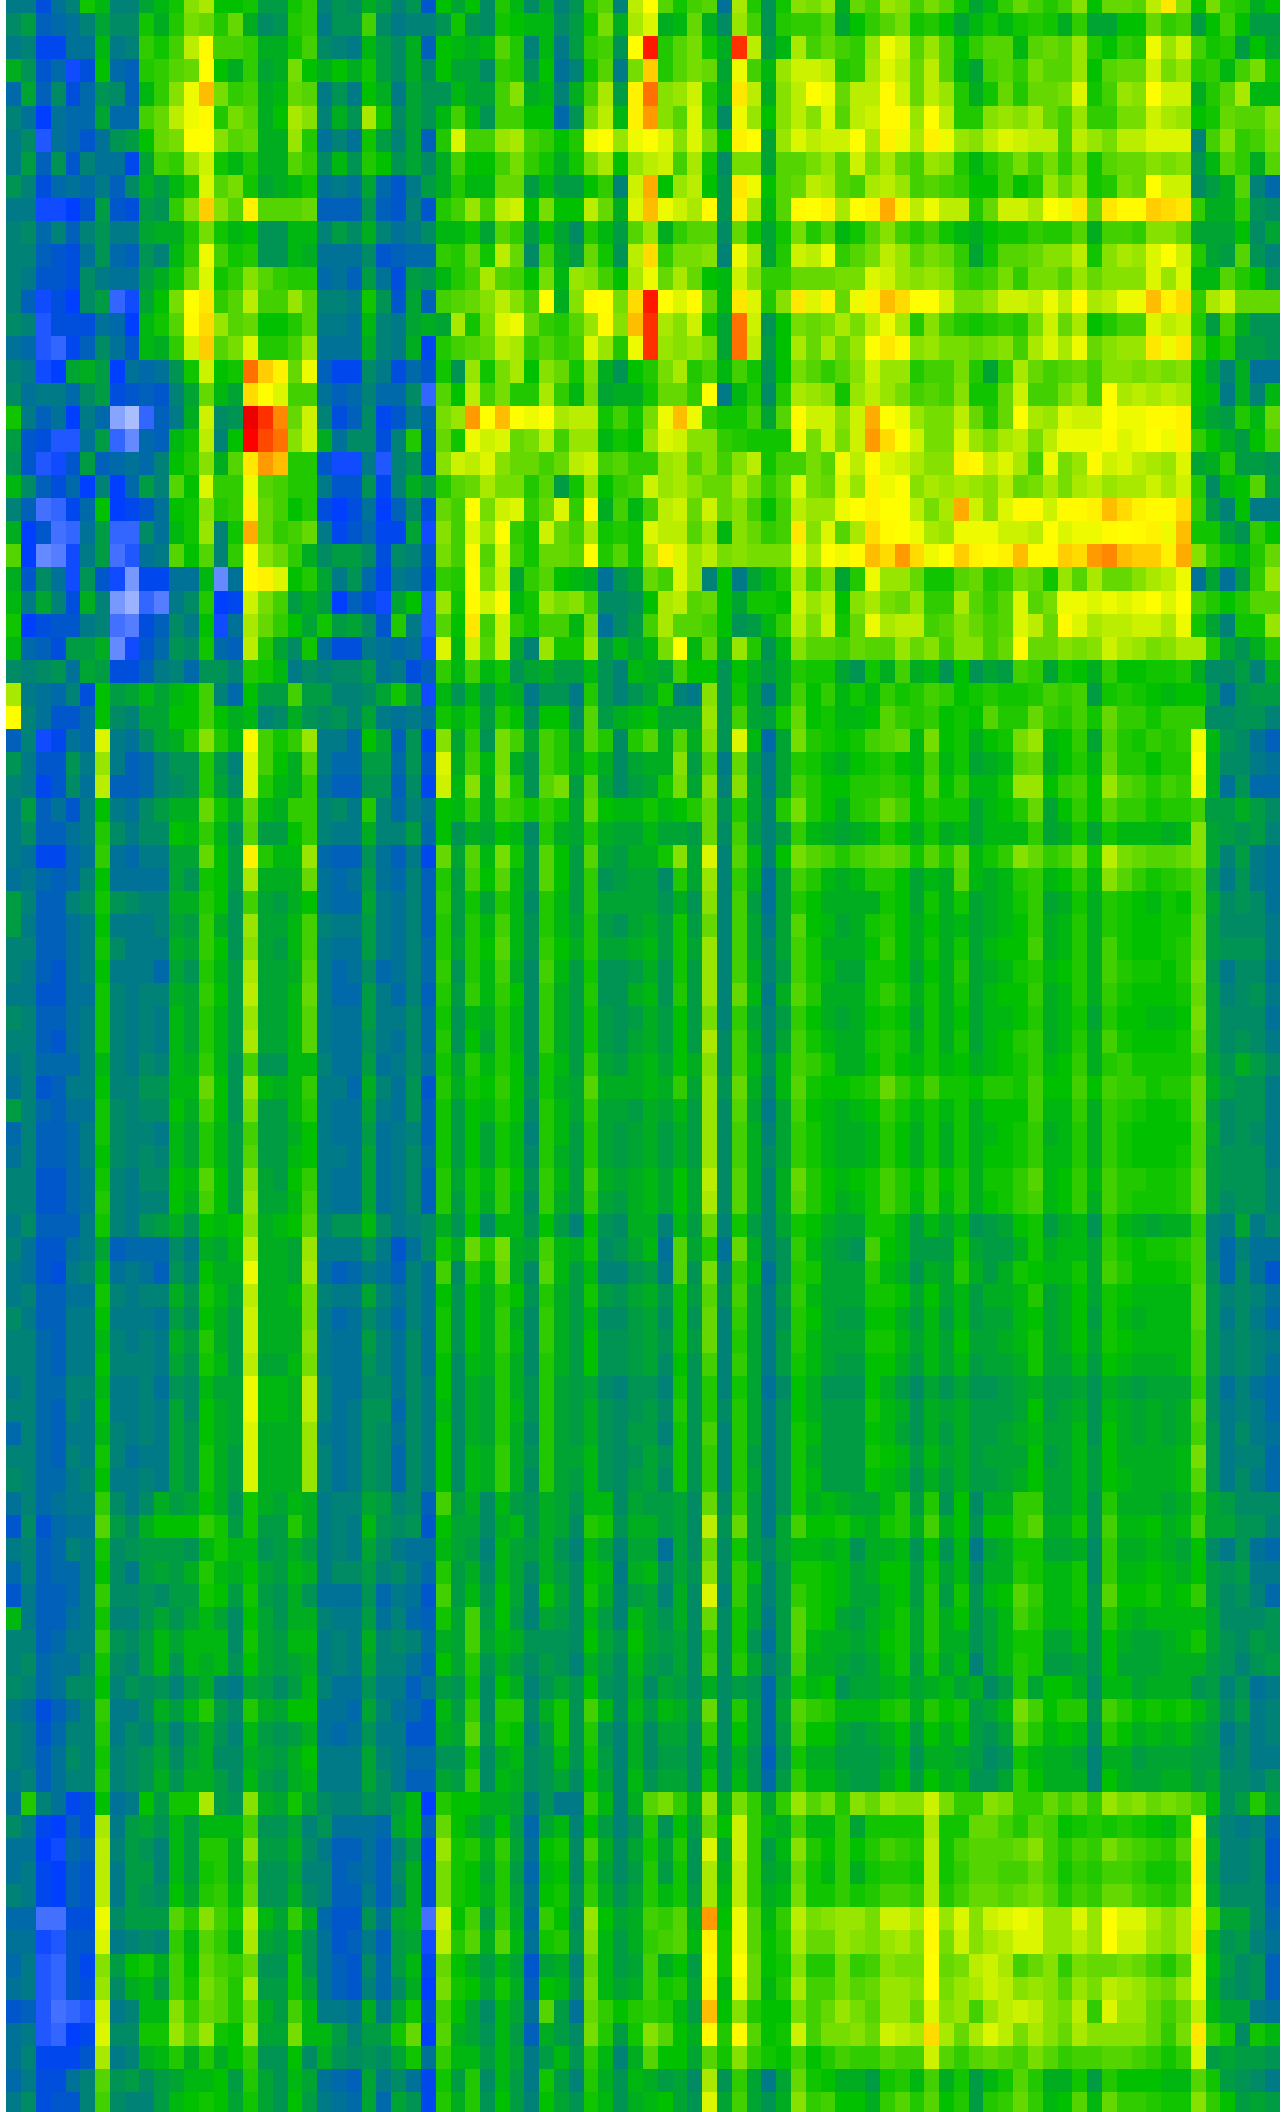

At3g61090  
At4g28130  
At3g02930  
At1g01570  
At1g49920  
At2g37160  
At1g77310  
At3g29150  
At5g56370  
At1g03710  
At5g40940  
At3g54490  
At1g14680  
At5g40550  
At1g06450  
At1g25470  
At4g33140  
At2g40250  
At5g58190  
At5g47520  
At4g30760  
At1g73570  
At1g75110  
At5g24610  
At5g40640  
At4g30140  
At1g26300  
At4g35560  
At4g34590  
At5g38330  
At3g62610  
At2g31210  
At1g16705  
At5g20240  
At3g54340  
At3g15880  
At3g26125  
At4g18960  
At1g32180  
At1g20120  
At4g20050  
At1g06990  
At1g75930  
At1g23570  
At5g07560  
At5g07550  
At1g75920  
At3g59530  
At1g28375  
At3g25050  
At1g75910  
At3g15400  
At1g66850  
At1g23580  
At1g23610  
At3g52810  
At5g07510  
At5g07530  
At1g61110  
At5g07520  
At1g23240  
At2g23800  
At5g07540  
At1g28430  
At5g61605  
At1g30795  
At3g26140  
At5g20330  
At5g22980  
At2g12480  
At3g20520  
At3g49270  
At4g32170  
At1g04645  
At2g42830  
At4g12960  
At5g49180  
At1g24540  
At4g27590  
At1g01600  
At3g10570  
At1g63710  
At5g55720  
At3g18850  
At5g45960  
At1g12570  
At5g33370  
At5g02190  
At4g13710  
At4g13210  
At5g25390  
At1g57750

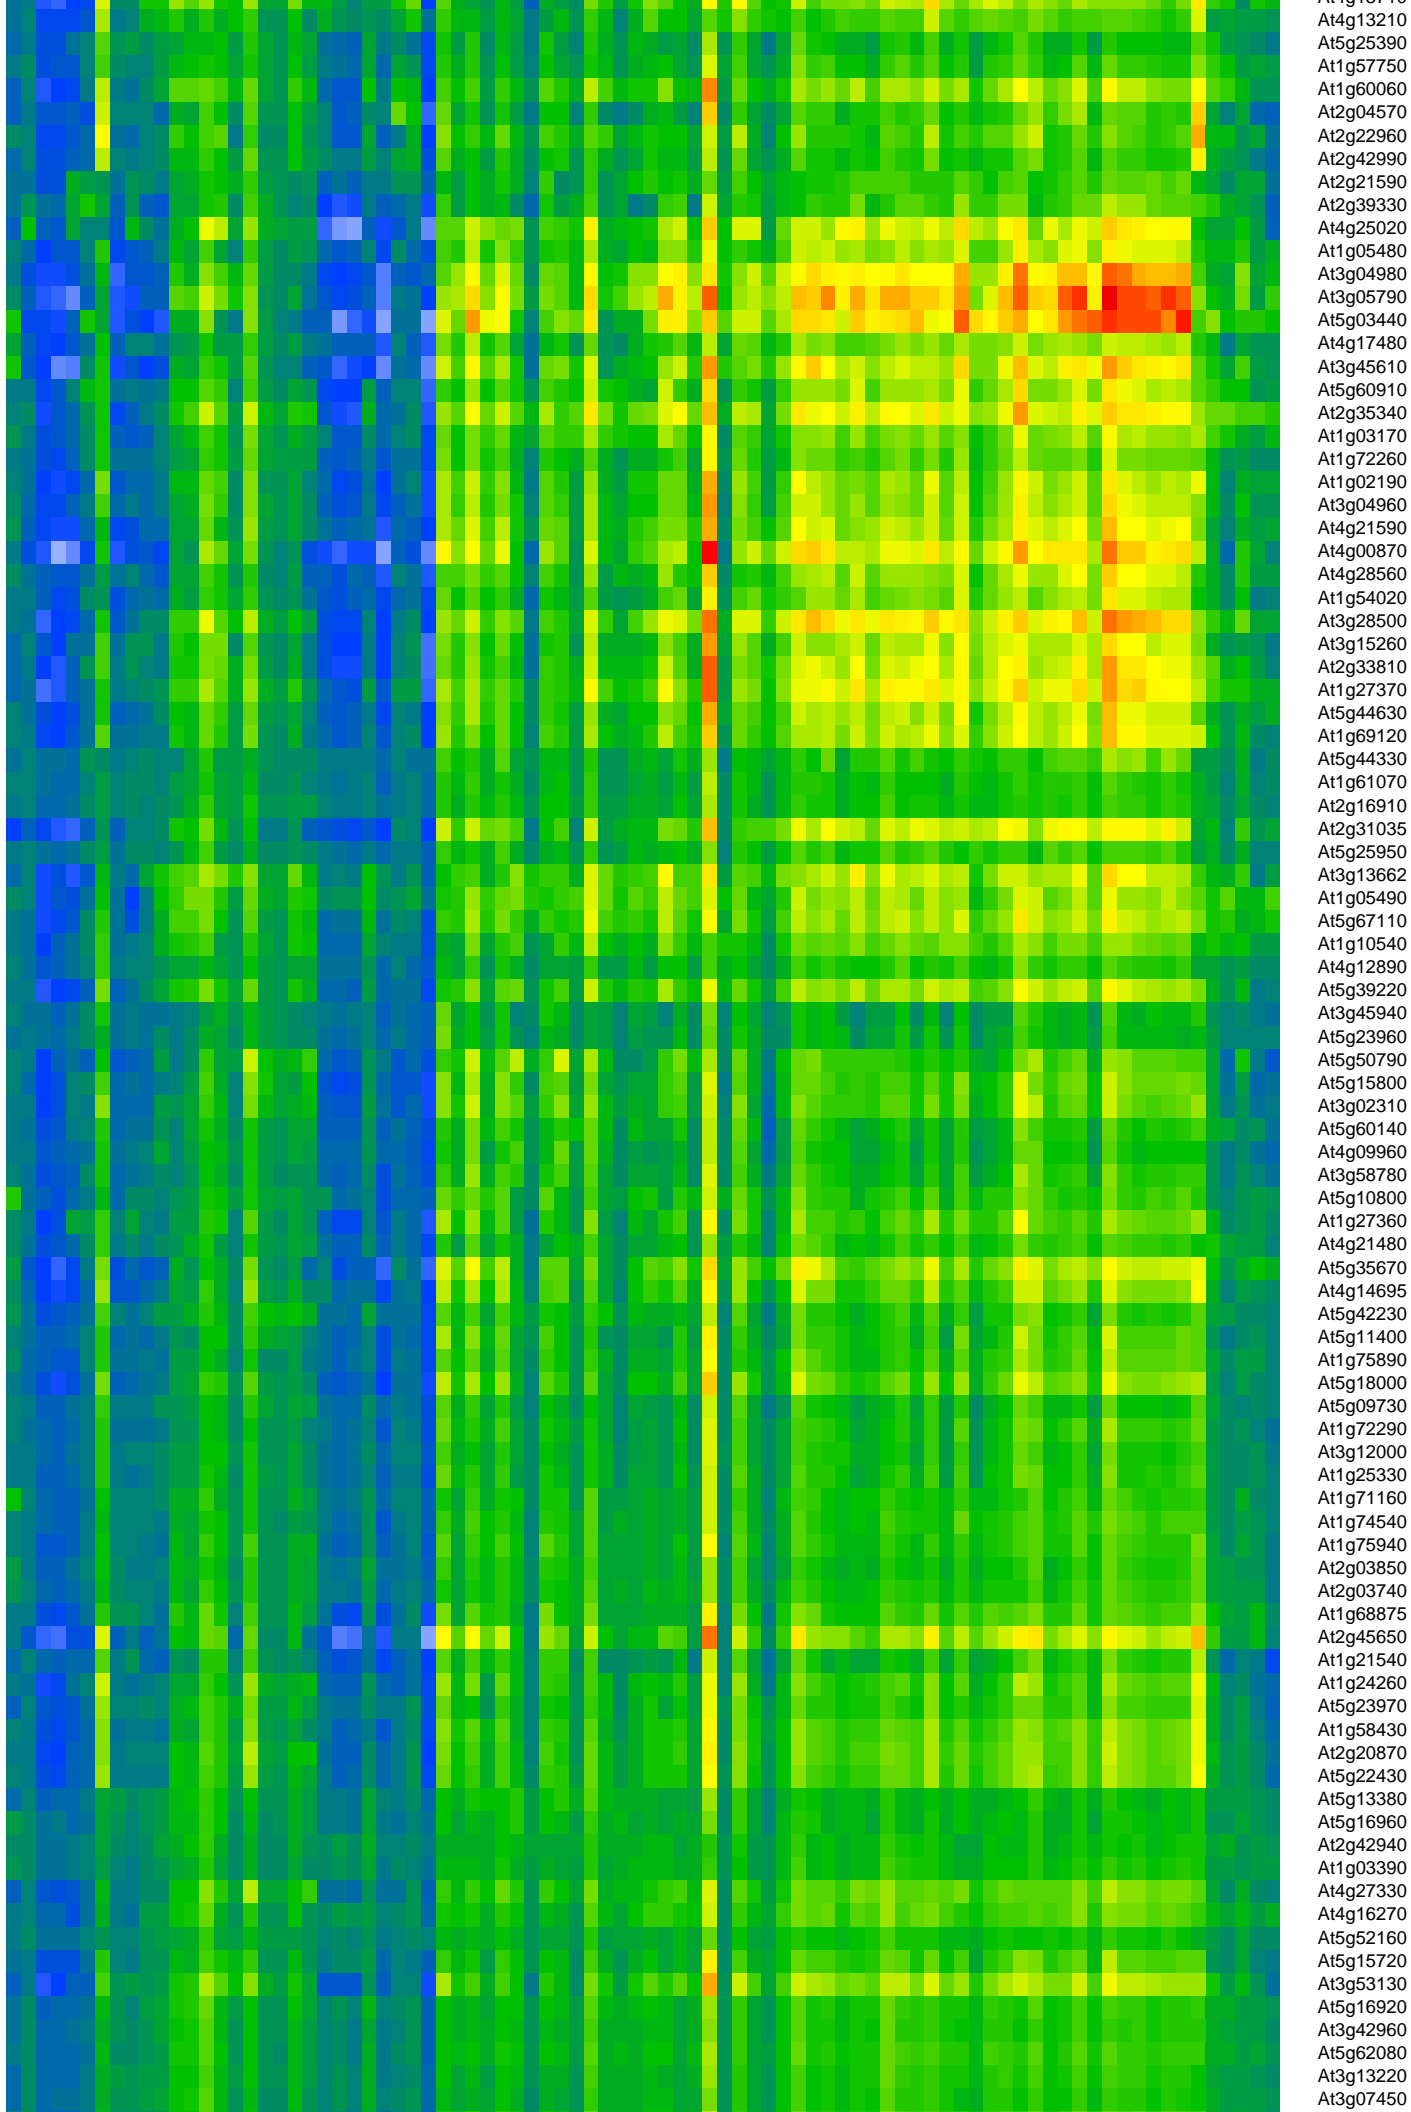

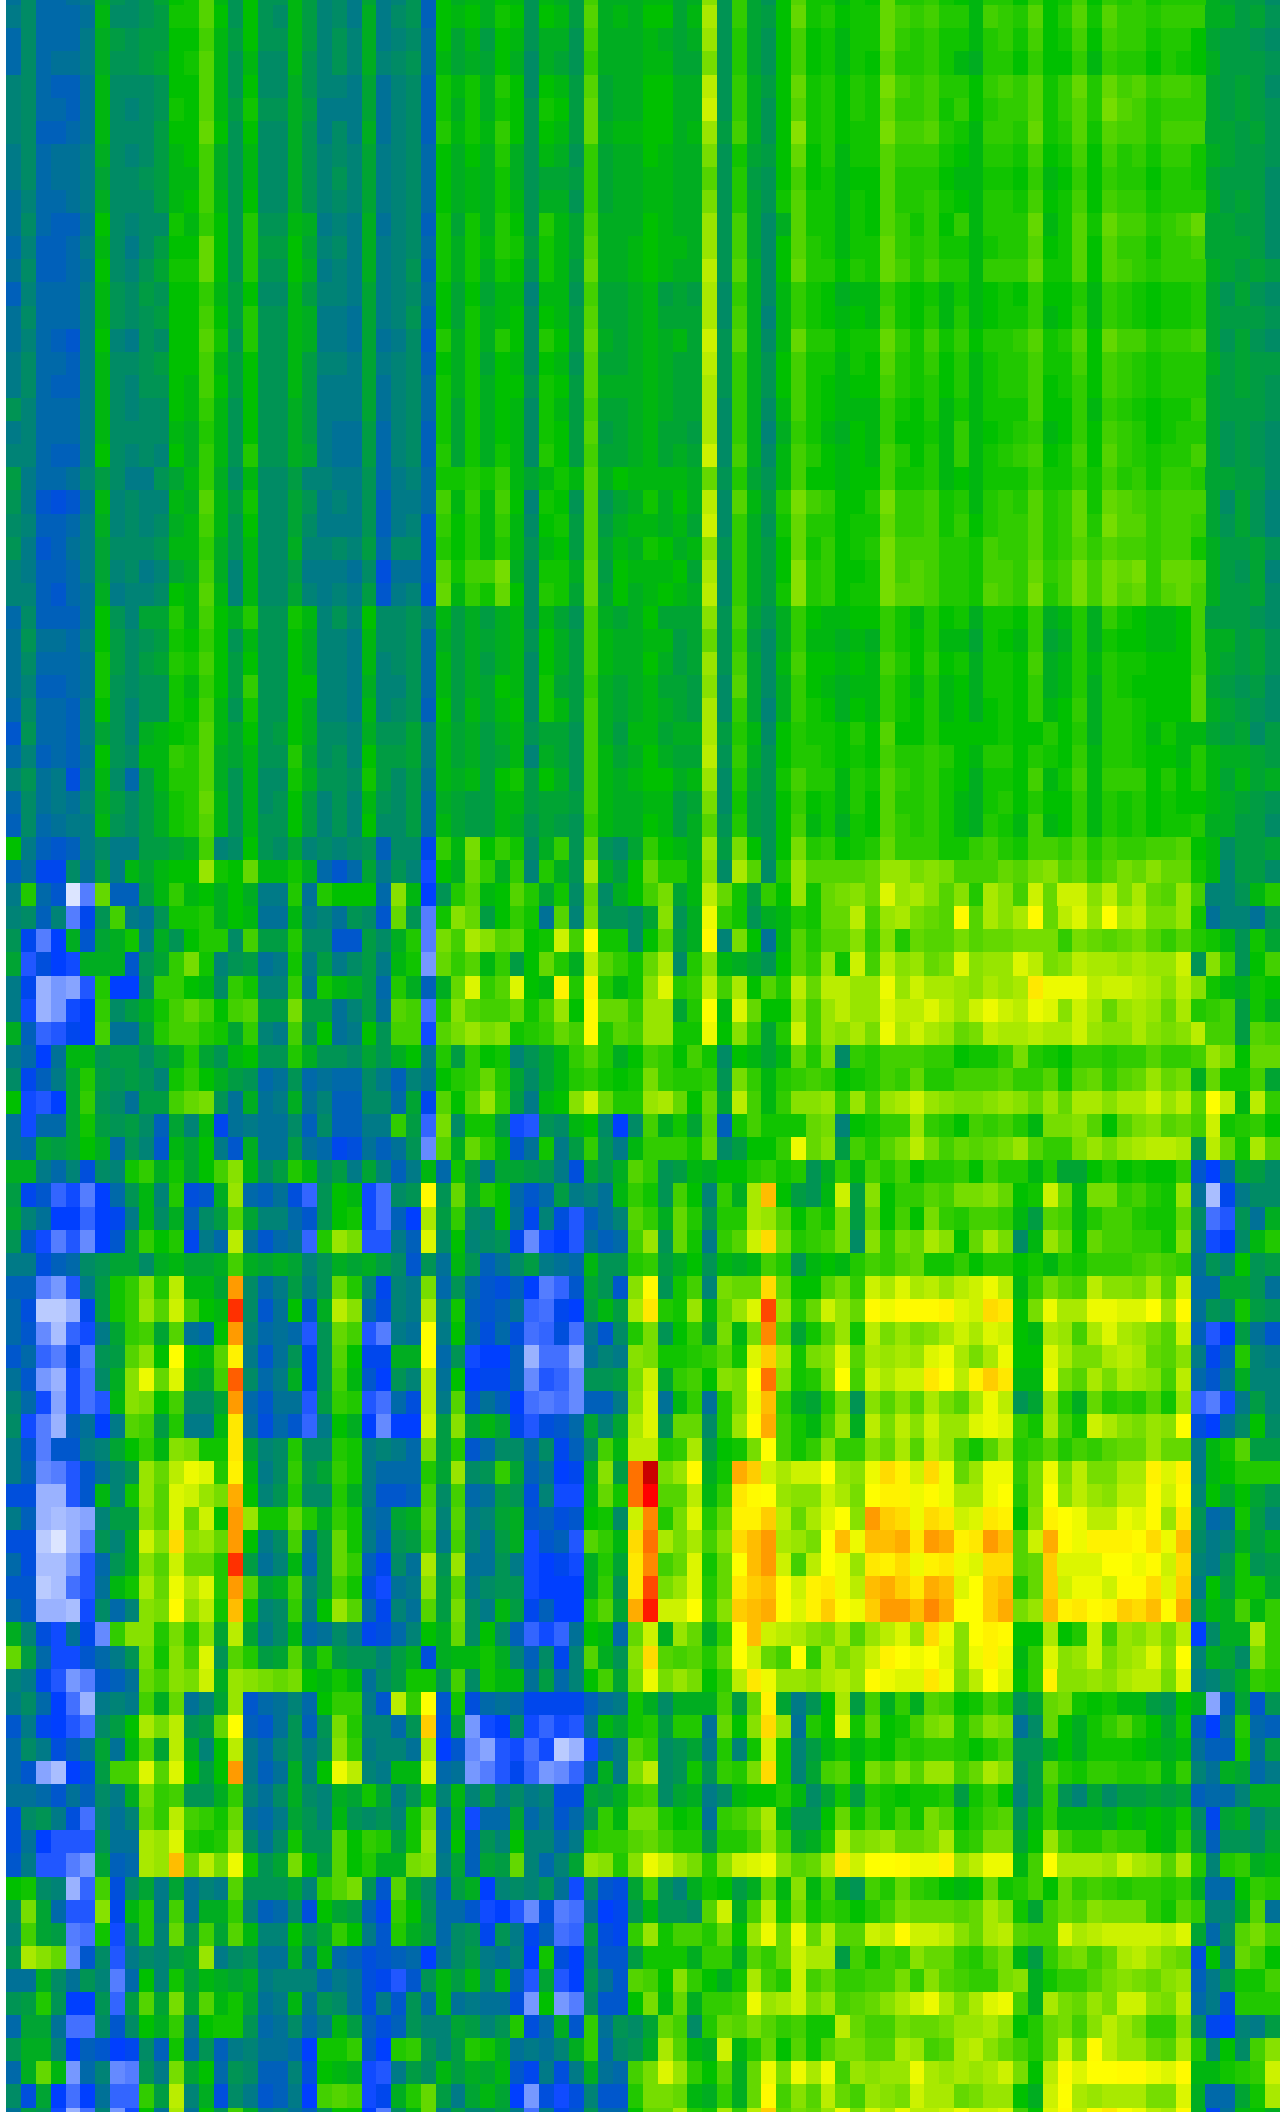

At5g62080  
At3g13220  
At3g07450  
At5g07230  
At3g57620  
At1g69500  
At3g52130  
At4g34860  
At1g62940  
At1g44222  
At1g75790  
At1g33430  
At3g52160  
At1g13140  
At1g22015  
At1g02813  
At4g28395  
At1g67990  
At2g19070  
At3g51590  
At1g02050  
At1g06170  
At3g11980  
At4g35420  
At1g01280  
At4g14080  
At1g13150  
At1g30010  
At5g48210  
At1g06260  
At4g14815  
At1g20150  
At4g29250  
At5g62320  
At4g29980  
At4g20420  
At1g75030  
At1g62930  
At5g13460  
At1g07570  
At5g58340  
At2g40935  
At1g18840  
At5g04060  
At1g10870  
At3g03370  
At1g72530  
At5g55900  
At3g06110  
At5g08120  
At4g34430  
At1g80410  
At4g08390  
At3g47520  
At4g22510  
At3g24570  
At4g13720  
At2g44050  
At5g17630  
At5g19750  
At1g14810  
At1g75330  
At2g29260  
At1g26750  
At5g27820  
At2g40010  
At5g45590  
At4g13170  
At4g00810  
At1g77750  
At5g13280  
At3g29010  
At2g21090  
At5g19820  
At2g43090  
At5g63980  
At5g40810  
At4g05210  
At1g01910  
At3g14580  
At5g38460  
At2g42880  
At4g18030  
At1g67930  
At5g45750  
At4g24190  
At5g36890  
At5g47870  
At2g40230  
At1g09630  
At4g24330



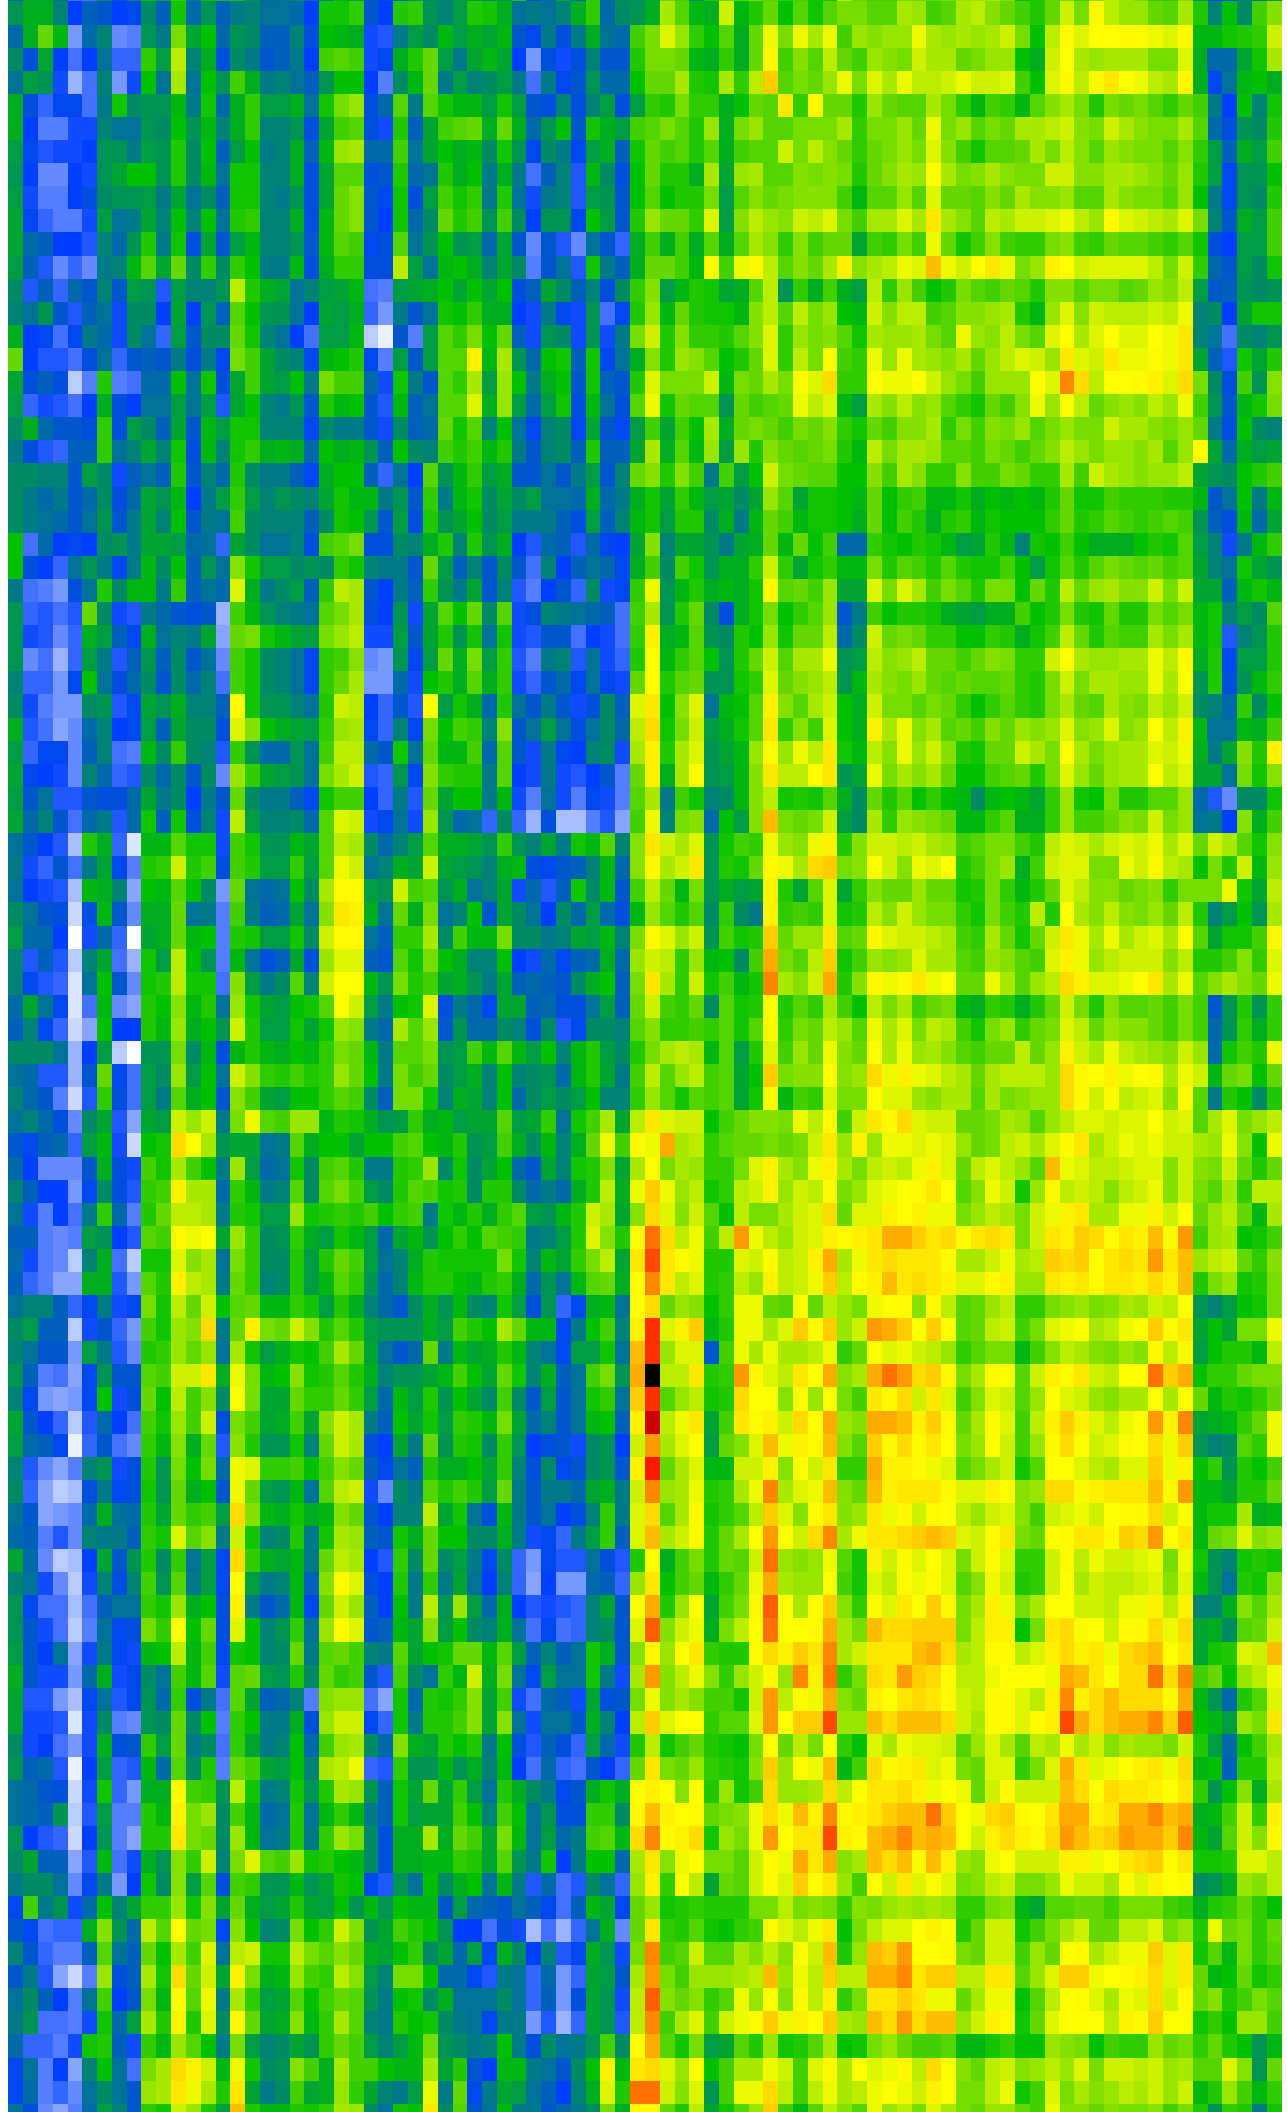

At2g40230  
At1g09630  
At4g24330  
At4g32390  
At5g24850  
At3g51240  
At3g55120  
At5g05270  
At5g13930  
At5g08640  
At1g78580  
At1g06000  
At1g13320  
At3g25580  
At1g22520  
At3g57890  
At4g11820  
At5g50390  
At5g16190  
At1g64690  
At4g35990  
At1g02490  
At3g28350  
At5g24260  
At5g62520  
At4g22756  
At3g10860  
At1g67350  
At4g16450  
At4g34700  
At5g52840  
At2g20360  
At5g11560  
At2g21870  
At1g61580  
At5g20080  
At2g42310  
At2g02050  
At1g27310  
At5g24400  
At2g30050  
At1g20050  
At4g22300  
At4g12650  
At1g26850  
At4g38200  
At3g15410  
At1g25490  
At5g65650  
At3g12180  
At5g36230  
At5g11640  
At5g38380  
At3g09470  
At5g54750  
At1g32210  
At1g09210  
At3g53880  
At2g43640  
At5g65420  
At1g34020  
At1g72730  
At2g21160  
At5g48580  
At5g63510  
At4g02580  
At1g79260  
At3g09820  
At5g03300  
At3g62120  
At2g17630  
At2g02480  
At5g04410  
At1g20950  
At1g12000  
At1g08280  
At3g43810  
At2g29560  
At1g75990  
At3g62360  
At1g79990  
At5g10840  
At4g39920  
At5g20510  
At2g29390  
At1g64650  
At4g35410  
At5g27490  
At5g59410  
At3g56490  
At4g37660  
At5g57400

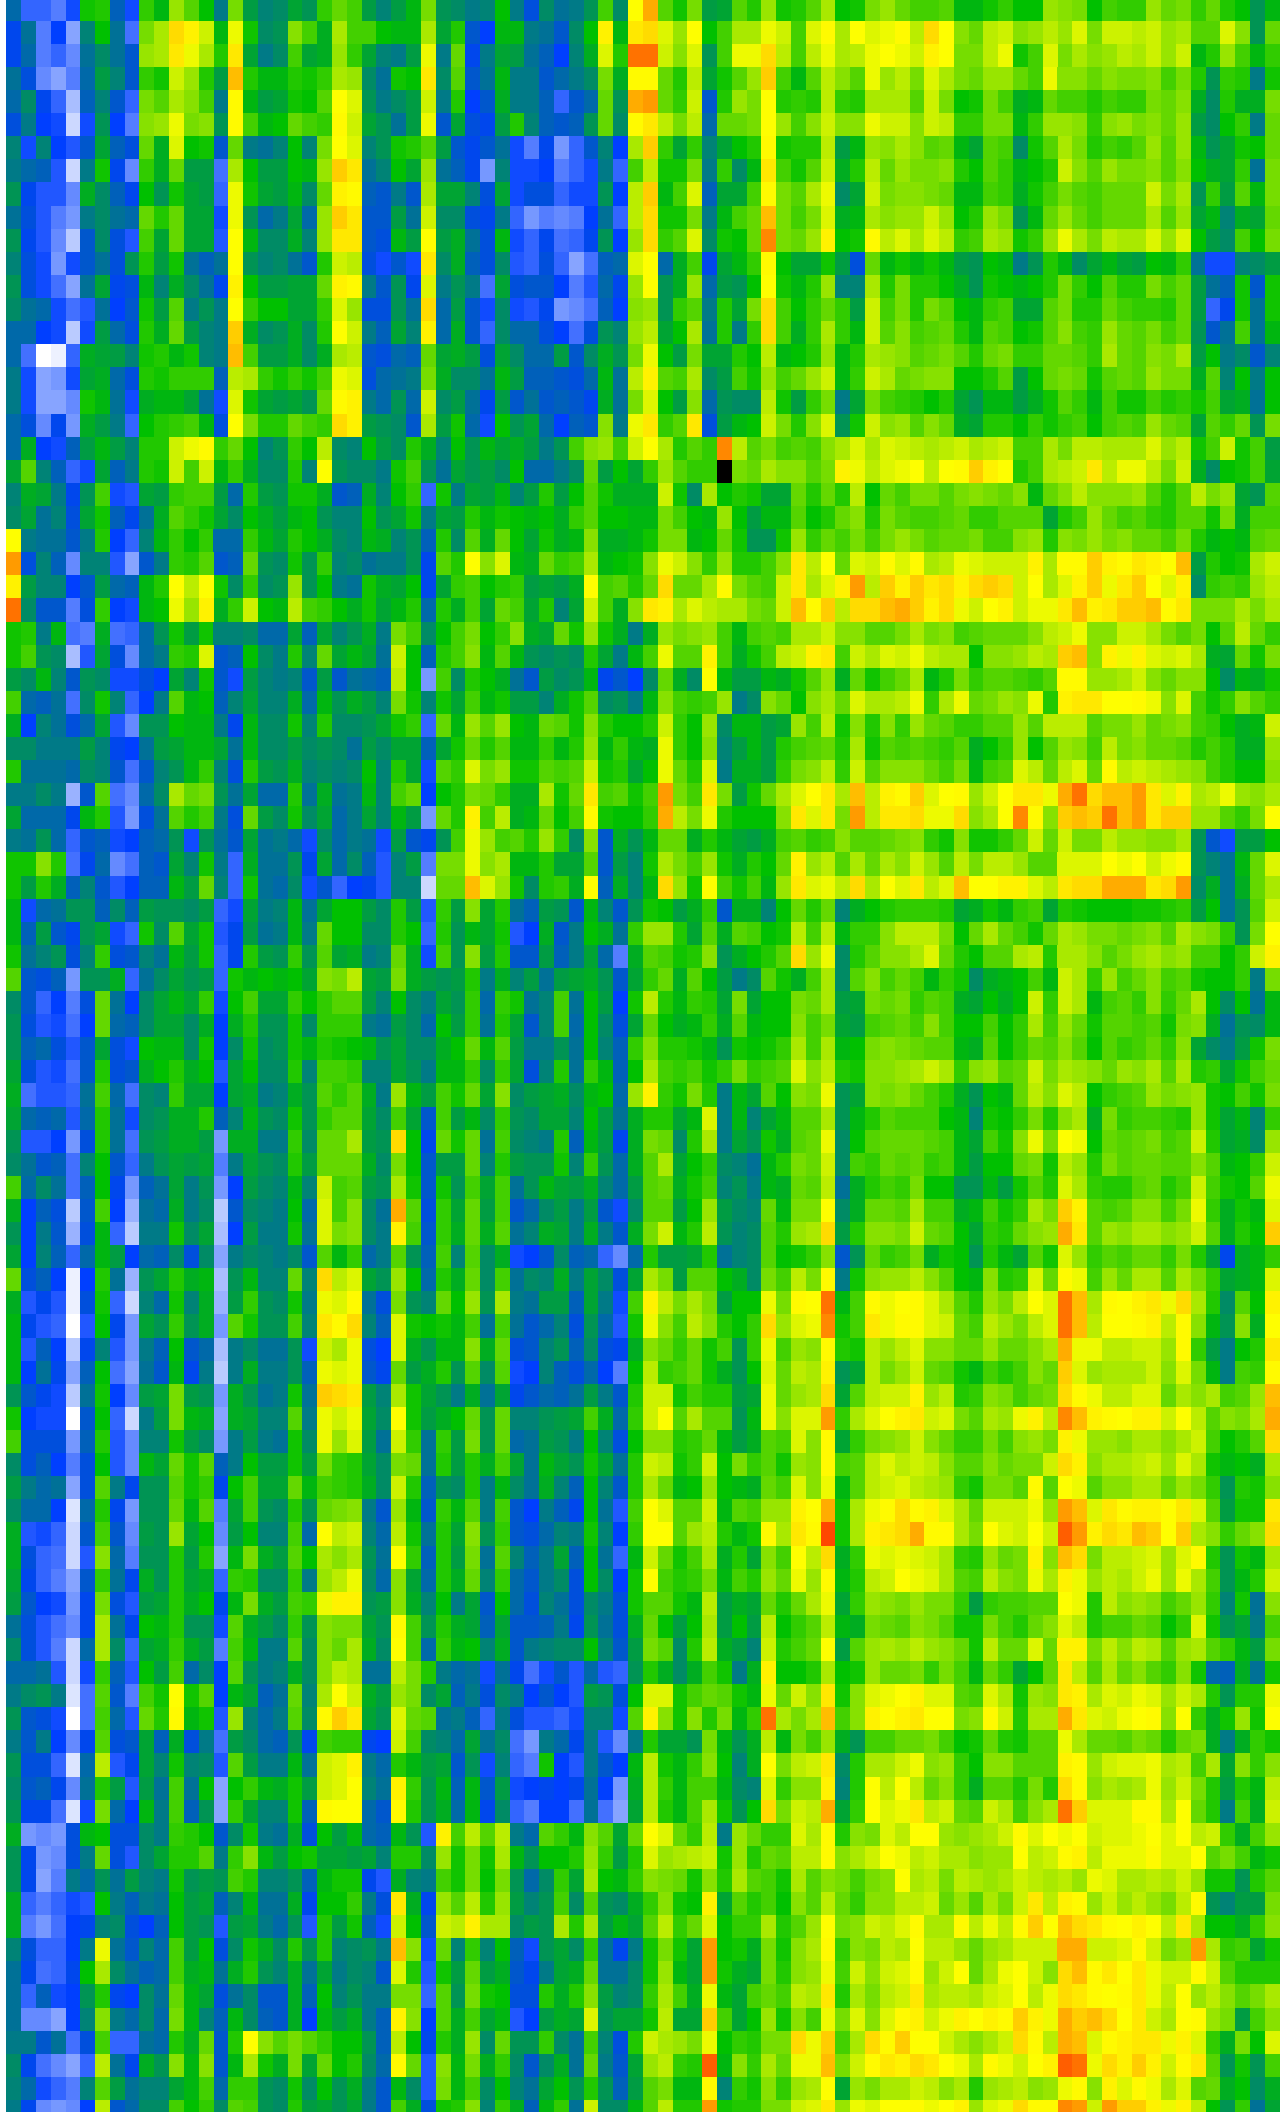

At5g59410  
At3g56490  
At4g37660  
At5g57490  
At1g22450  
At5g14030  
At3g25540  
At3g07480  
At4g29480  
At5g66510  
At4g11010  
At2g33040  
At5g14040  
At5g38480  
At5g47570  
At2g46540  
At4g20150  
At5g08060  
At5g60230  
At2g45080  
At1g08830  
At3g01830  
At5g54400  
At2g37210  
At4g18890  
At3g50050  
At4g03390  
At2g03240  
At3g16470  
At5g54510  
At4g39370  
At5g51870  
At4g35190  
At1g25330  
At2g39830  
At2g22080  
At3g09000  
At3g05830  
At1g23330  
At1g68650  
At4g39050  
At2g37060  
At3g05020  
At5g15530  
At4g10640  
At1g22170  
At5g12260  
At1g44970  
At1g67730  
At3g22540  
At3g15800  
At1g45130  
At3g20015  
At4g25835  
At5g19340  
At5g48230  
At5g27450  
At3g63200  
At2g38700  
At2g13820  
At4g22130  
At2g20650  
At5g25620  
At2g20680  
At5g17770  
At5g01620  
At5g49460  
At1g60810  
At3g43960  
At5g49800  
At5g15230  
At3g07950  
At1g13580  
At1g47290  
At5g11890  
At2g39900  
At4g34640  
At5g47770  
At3g20870  
At1g21480  
At5g09760  
At1g36160  
At4g37590  
At3g56480  
At1g69780  
At4g24390  
At1g28440  
At3g16630  
At5g22940  
At5g61440  
At5g66330

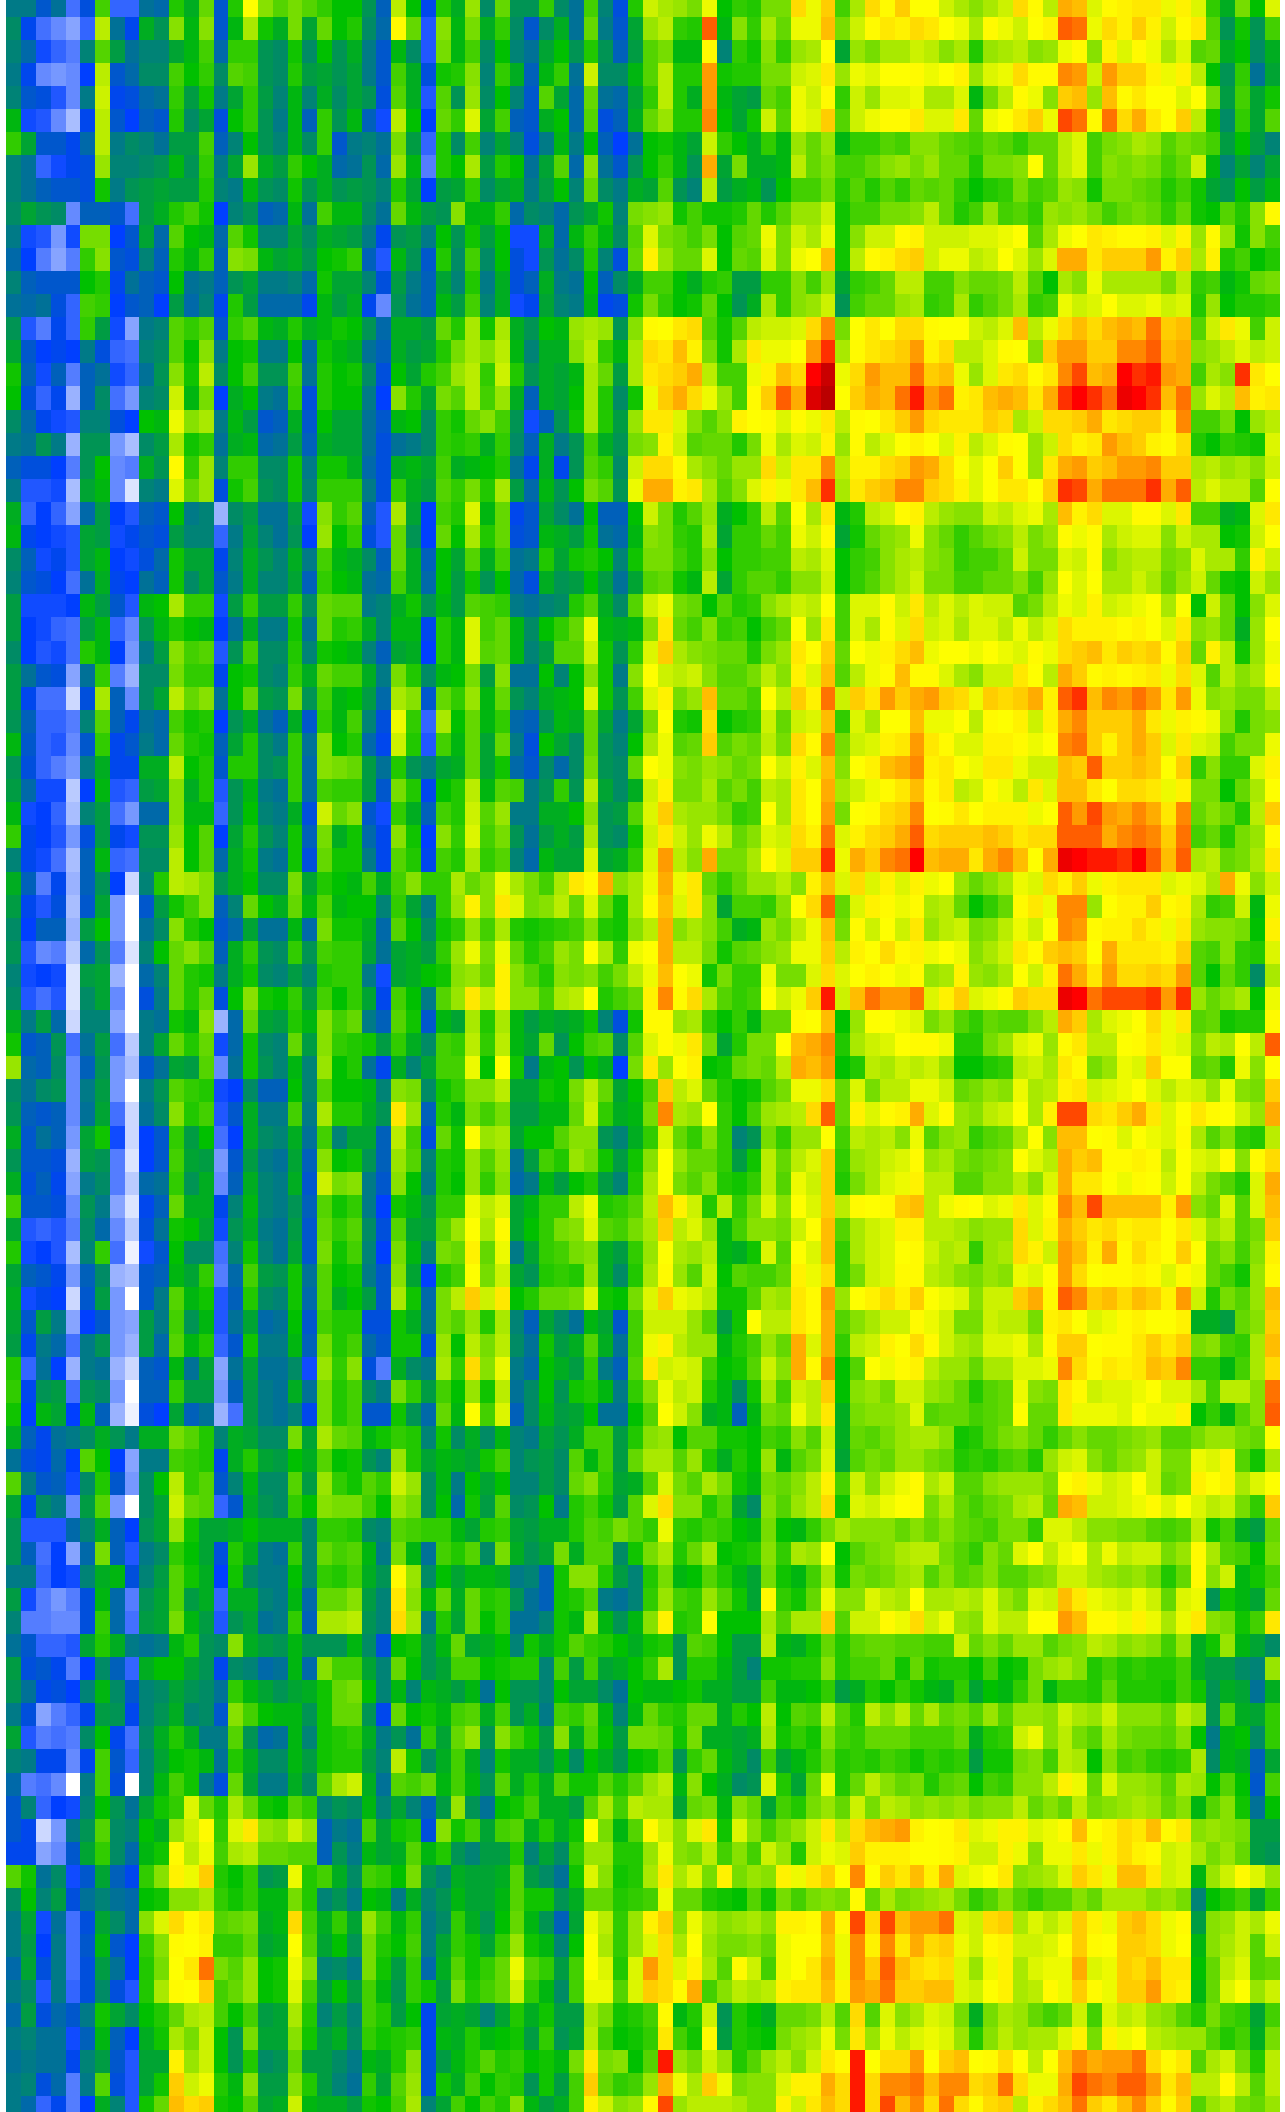

At3g16630  
At5g22940  
At5g61440  
At5g66330  
At3g16180  
At3g28860  
At4g37240  
At5g24580  
At5g55250  
At4g13940  
At1g18640  
At2g30410  
At1g21440  
At3g05000  
At3g59380  
At2g23530  
At5g20540  
At5g46700  
At5g59560  
At4g14420  
At5g58030  
At1g77350  
At5g58300  
At3g52900  
At2g40480  
At4g28250  
At2g47690  
At4g34500  
At2g37120  
At5g54440  
At5g54200  
At1g75840  
At2g47500  
At1g68430  
At5g62580  
At1g80690  
At2g34670  
At1g70470  
At1g23890  
At1g04030  
At1g26940  
At3g48410  
At5g07960  
At5g05080  
At3g03160  
At3g59100  
At1g76550  
At5g61840  
At3g49750  
At3g24450  
At1g47670  
At1g60390  
At2g01830  
At4g22120  
At4g03190  
At2g22900  
At5g23430  
At5g39990  
At1g26640  
At1g08350  
At3g03570  
At4g31920  
At5g15790  
At2g18030  
At2g46590  
At4g19185  
At5g55260  
At2g46225  
At5g02440  
At3g19100  
At1g72310  
At4g00560  
At2g22000  
At3g19100  
At1g79750  
At3g09690  
At1g77200  
At5g11280  
At1g26640  
At5g27710  
At5g65000  
At5g58630  
At1g60540  
At1g54960  
At3g27730  
At1g74150  
At5g61865  
At1g26310  
At1g13290  
At4g35900  
At3g11040  
At4g39790

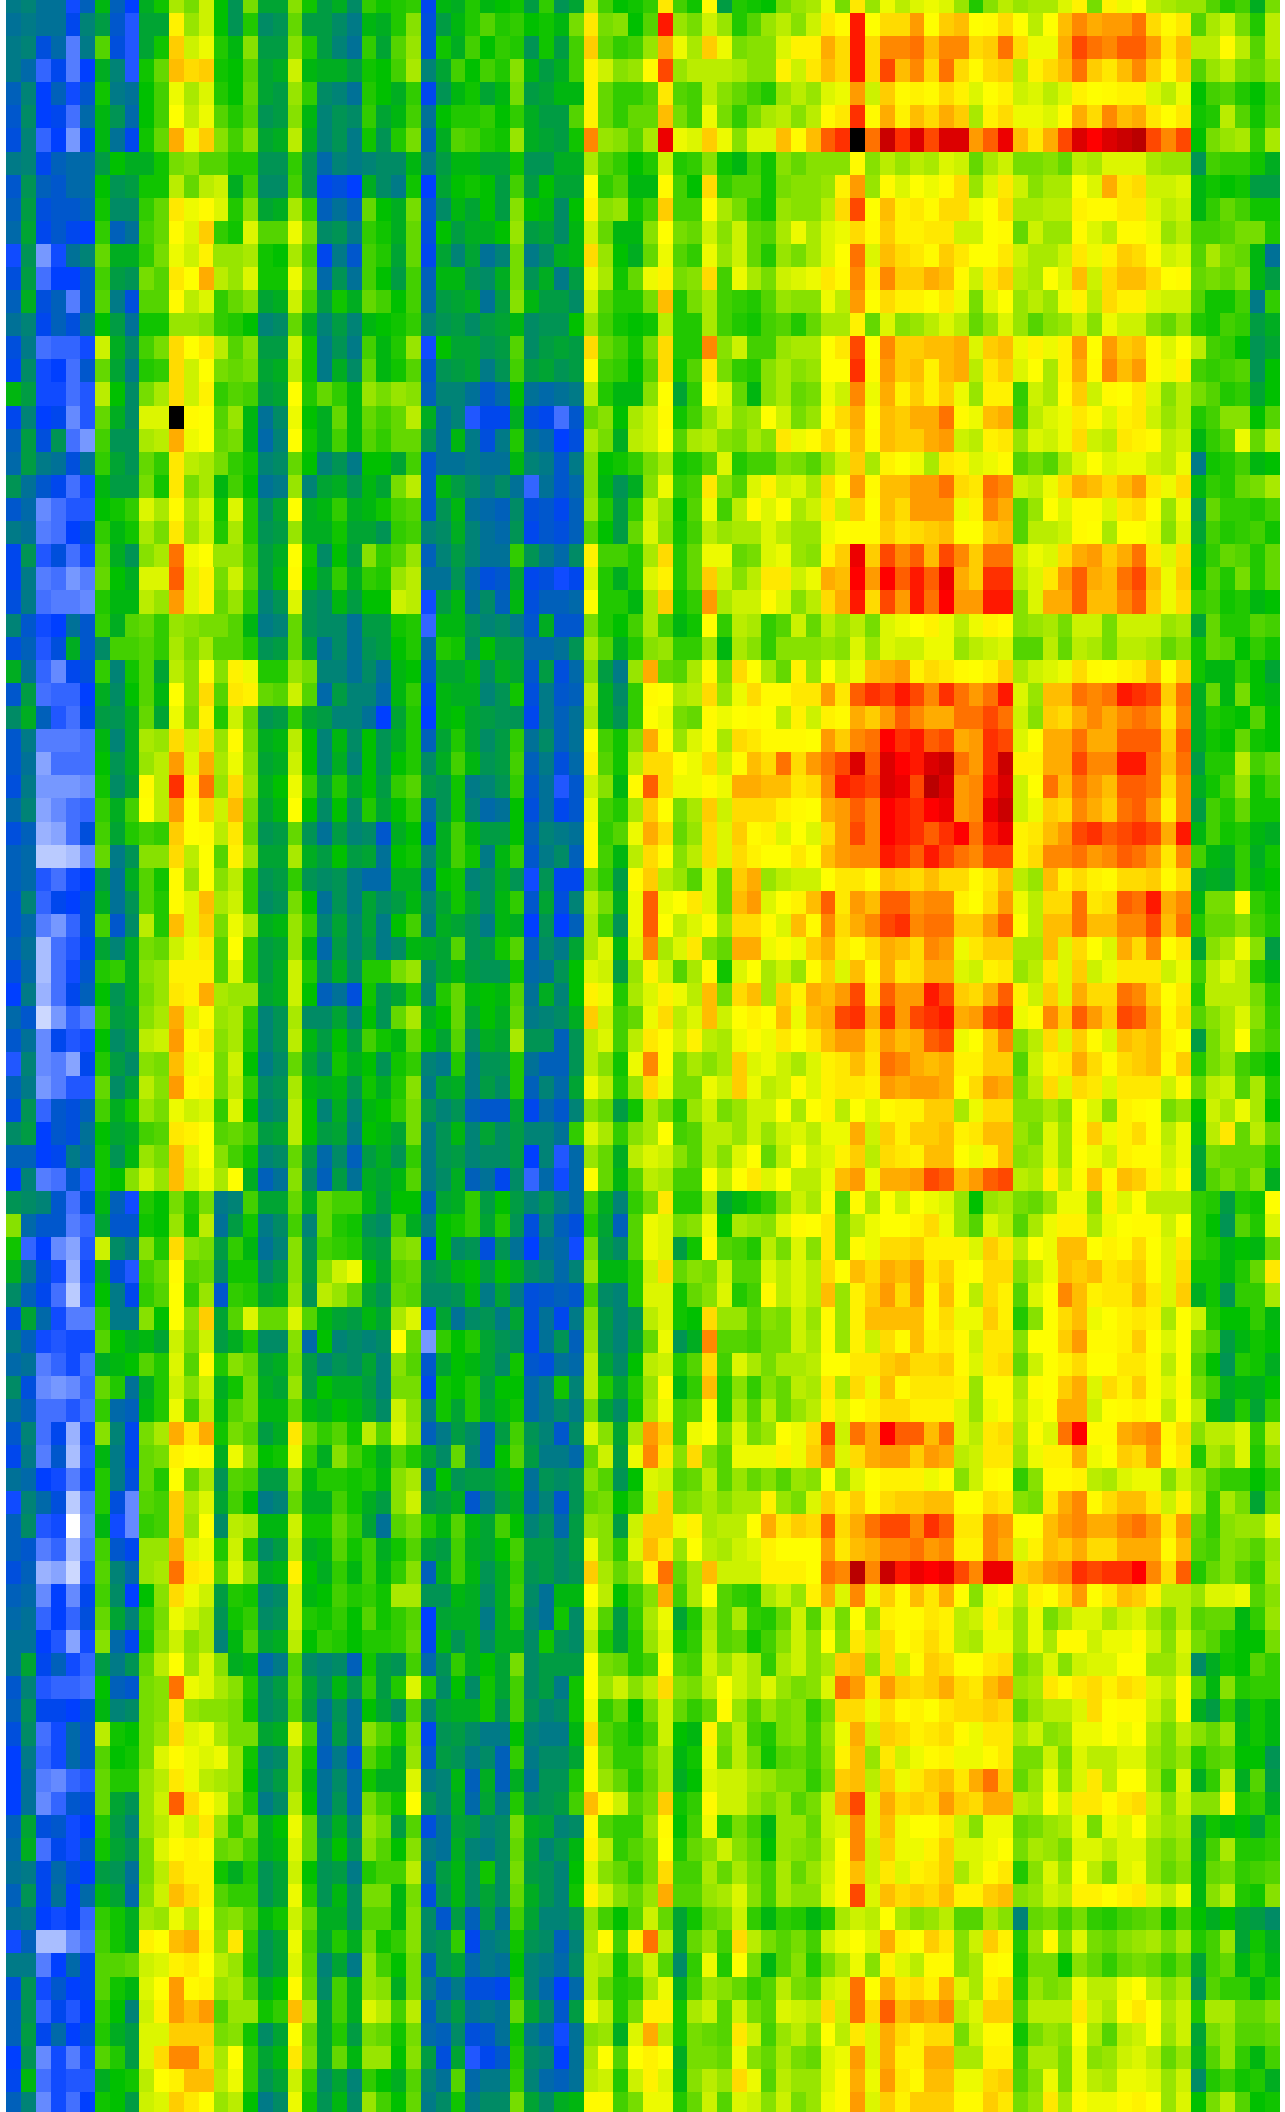

At1g13290  
At4g35900  
At3g11040  
At4g39790  
At3g12060  
At5g53950  
At5g48820  
At1g67770  
At5g55330  
At5g03060  
At1g11940  
At3g52610  
At3g12460  
At2g28610  
At1g75430  
At5g62230  
At1g26780  
At5g66800  
At4g37630  
At2g20290  
At5g16850  
At4g32730  
At5g37630  
At4g00010  
At1g50230  
At5g27550  
At5g55340  
At5g43160  
At3g49850  
At1g77460  
At5g43070  
At1g30825  
At3g26050  
At3g59550  
At2g37570  
At1g67180  
At2g39880  
At5g04620  
At4g05450  
At2g05760  
At4g31600  
At4g38370  
At3g46580  
At3g62050  
At2g44440  
At3g09660  
At5g19570  
At4g35335  
At1g50710  
At4g16570  
At4g17430  
At1g74390  
At4g02810  
At5g04840  
At5g41000  
At1g11160  
At5g40030  
At3g58800  
At1g70895  
At1g62950  
At1g79060  
At1g73930  
At3g60840  
At1g47200  
At2g05755  
At3g56110  
At5g11980  
At2g43990  
At5g06940  
At2g16580  
At5g42780  
At3g05980  
At3g05480  
At3g01380  
At3g43840  
At3g05430  
At4g18375  
At4g28180  
At3g63290  
At1g04150  
At2g32940  
At1g07270  
At4g32540  
At5g40600  
At1g18340  
At5g49390  
At5g58280  
At3g48910  
At3g09080  
At4g30700  
At5g65990  
At4g15950

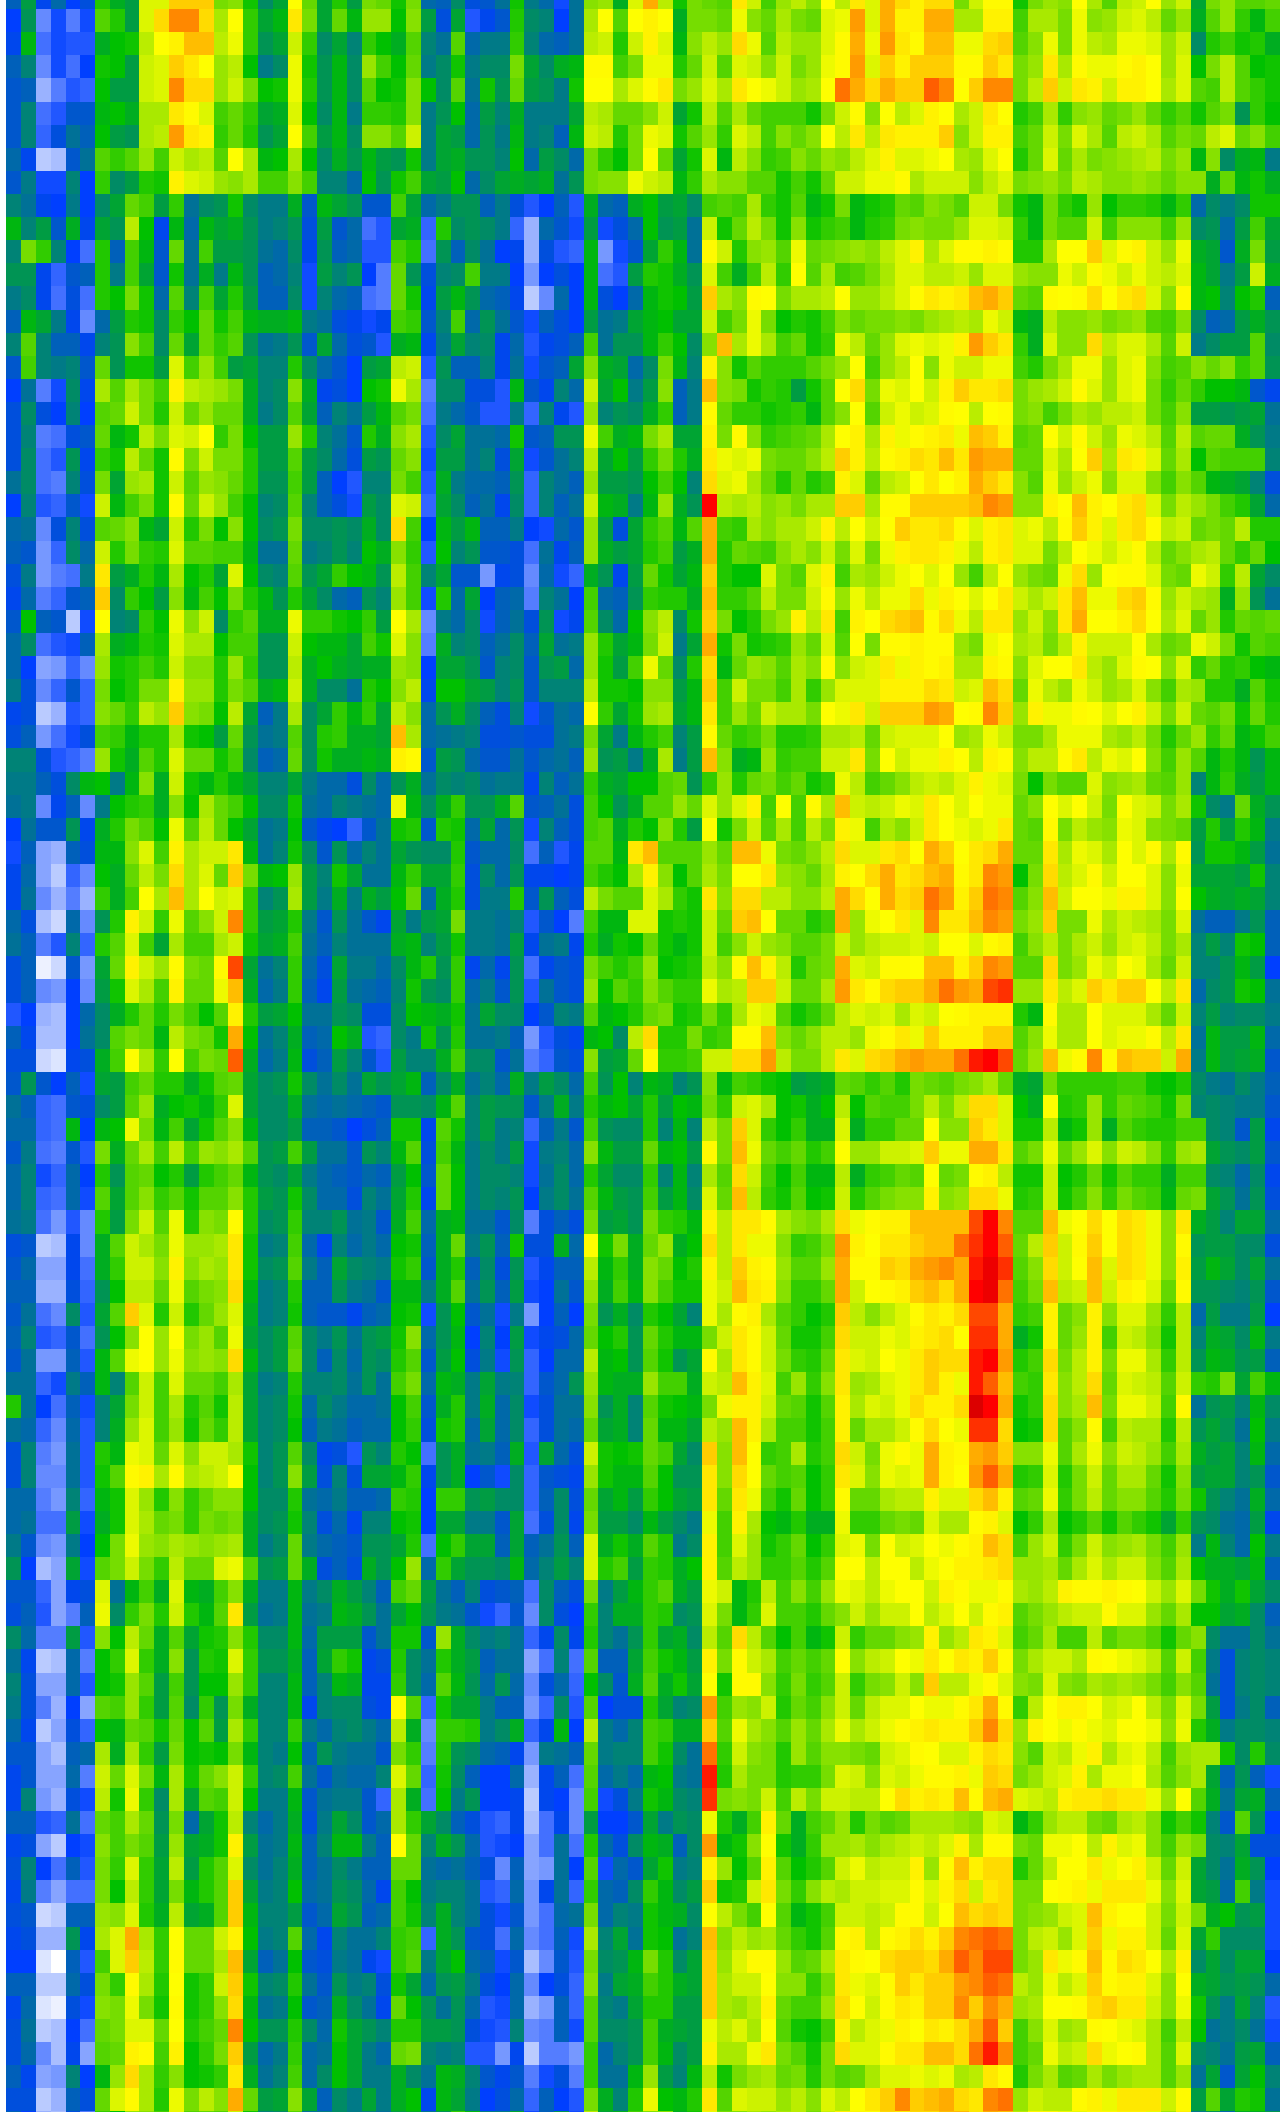

At4g30700  
At5g65990  
At4g15950  
At5g64630  
At5g06250  
At5g17250  
At4g25600  
At2g30460  
At1g56670  
At5g54590  
At5g18500  
At3g25500  
At1g20330  
At1g75560  
At1g19050  
At2g19780  
At1g05230  
At1g62050  
At5g54530  
At3g28420  
At1g76620  
At1g69690  
At1g35510  
At1g14460  
At4g08690  
At5g48460  
At2g37585  
At5g07800  
At5g48520  
At3g32400  
At3g60630  
At4g29720  
At2g40980  
At5g55450  
At5g20070  
At1g71750  
At5g47630  
At2g18990  
At2g14860  
At1g18090  
At4g32700  
At5g19620  
At1g10930  
At4g26410  
At4g34265  
At1g76405  
At5g27895  
At3g06120  
At1g27940  
At3g01140  
At1g65445  
At1g65450  
At2g26520  
At1g80080  
At5g60880  
At1g34245  
At5g47380  
At1g06100  
At5g19170  
At2g35020  
At5g40330  
At2g33850  
At5g41460  
At3g57600  
At5g45850  
At5g04660  
At4g11640  
At5g11380  
At2g35620  
At2g06925  
At4g38950  
At5g19730  
At1g65060  
At2g45970  
At1g56580  
At2g28410  
At4g39330  
At1g70370  
At2g28100  
At2g24150  
At1g49730  
At1g27460  
At5g13140  
At1g68780  
At5g58480  
At2g30890  
At5g42100  
At2g13610  
At3g49670  
At2g38570  
At3g60510

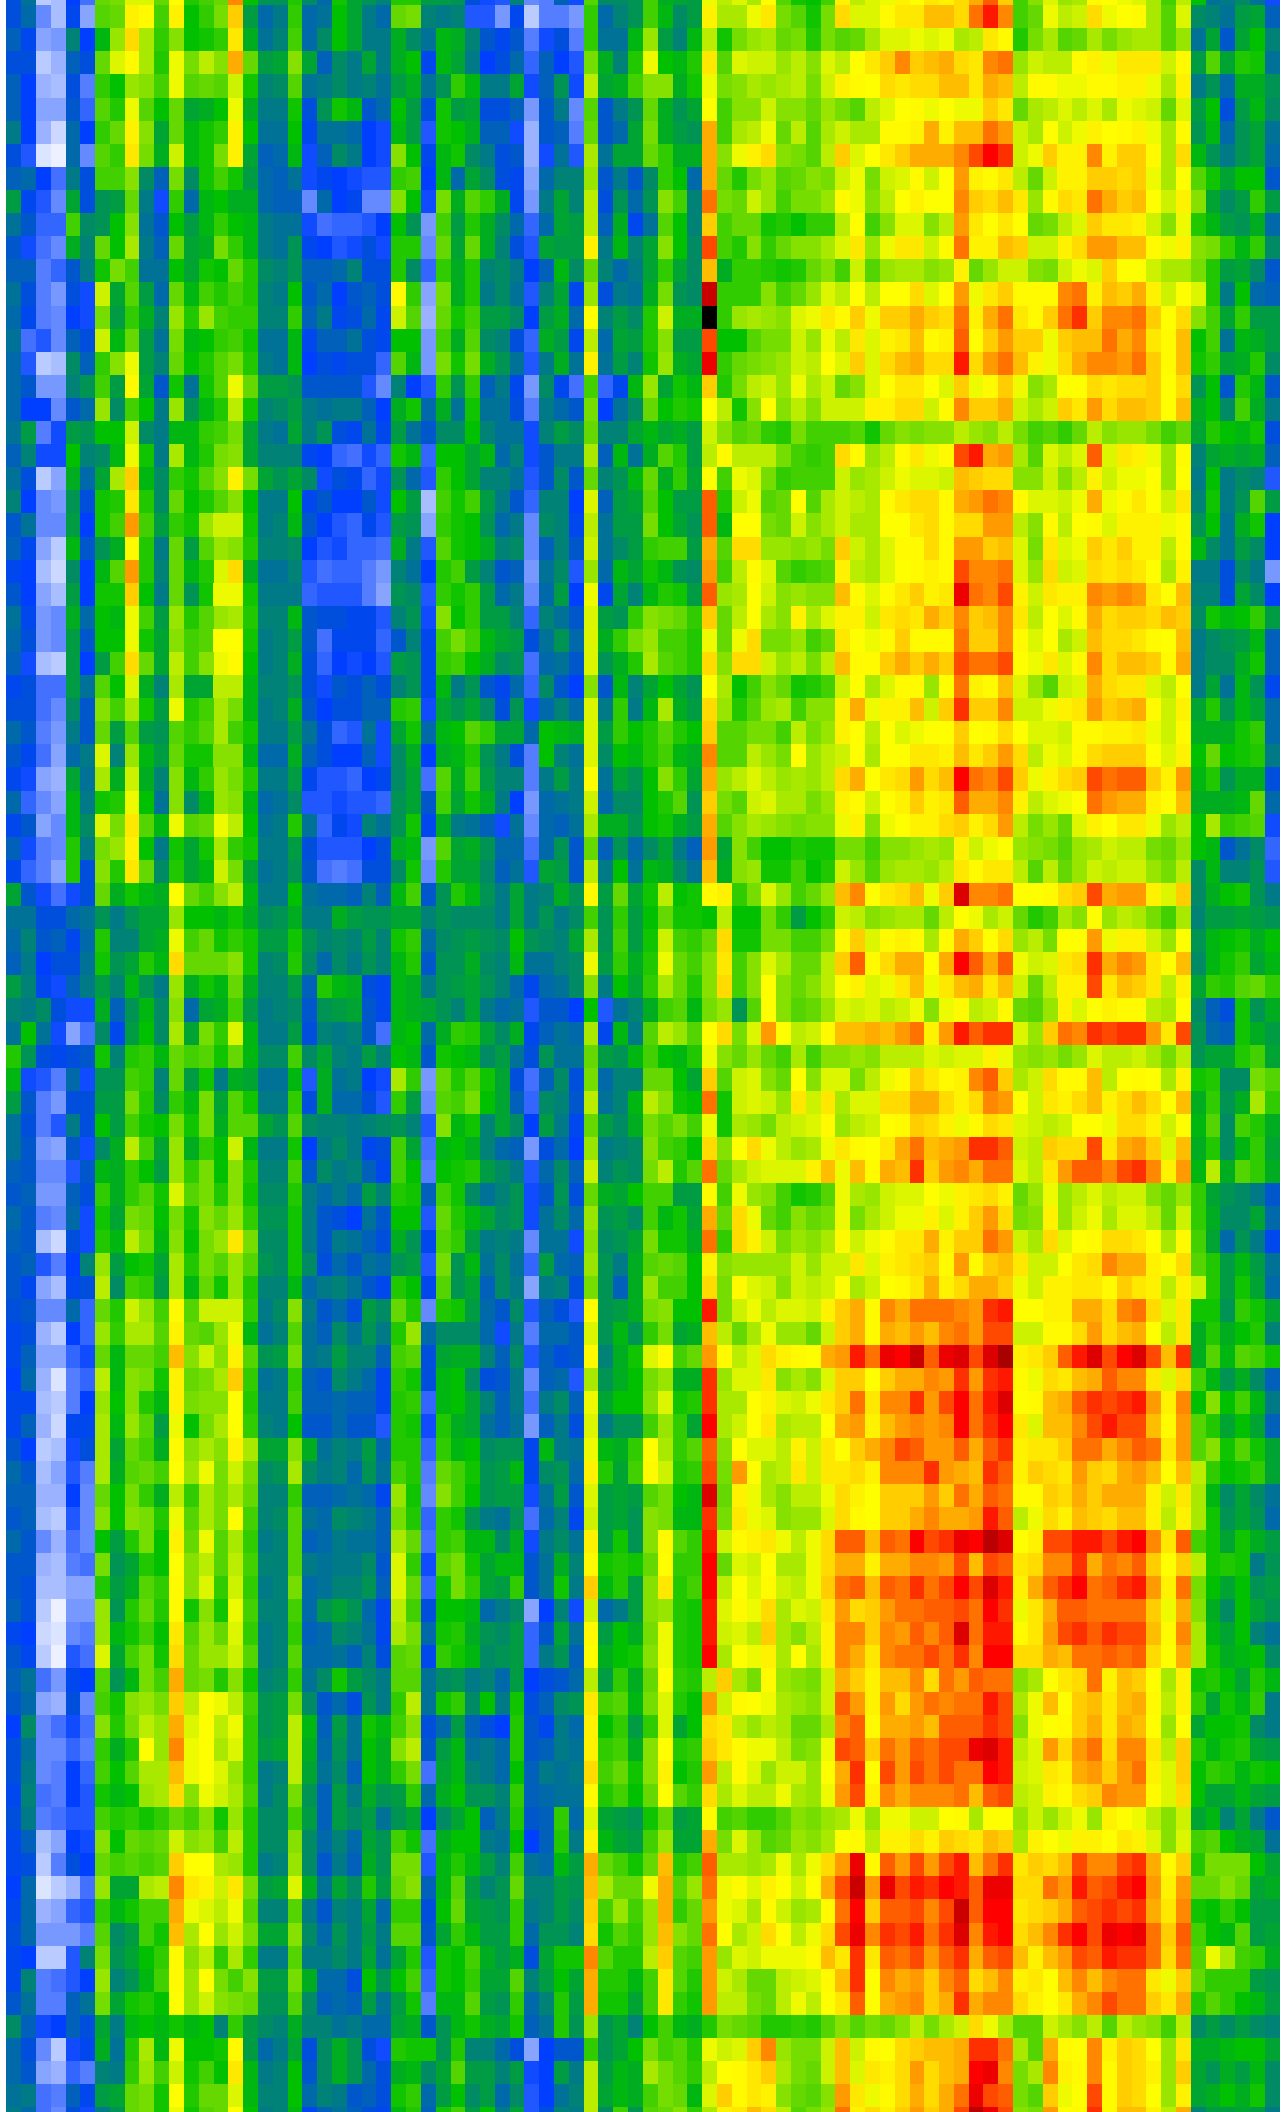

At3g49670  
At2g38570  
At3g60510  
At1g77580  
At2g37380  
At4g28220  
At4g23740  
At3g51850  
At2g26770  
At4g00430  
At1g60800  
At5g48485  
At5g18460  
At1g70210  
At3g13690  
At4g38430  
At3g20790  
At3g15160  
At4g09640  
At4g24540  
At5g66550  
At5g14210  
At3g50240  
At1g30530  
At5g42240  
At1g14840  
At1g80850  
At3g16010  
At3g05750  
At4g32980  
At3g25670  
At5g26910  
At5g55230  
At4g18570  
At1g31650  
At2g01760  
At1g62030  
At2g45590  
At3g60390  
At3g29590  
At5g60780  
At1g13400  
At5g19260  
At3g17340  
At4g17240  
At5g66610  
At1g70550  
At3g56810  
At3g05330  
At5g42720  
At1g31335  
At1g65620  
At1g24020  
At1g14820  
At1g08470  
At2g46380  
At5g55540  
At4g37110  
At5g67070  
At3g17350  
At2g28950  
At2g05210  
At2g20230  
At1g72970  
At3g04290  
At1g11600  
At5g45670  
At2g42840  
At5g55730  
At5g19290  
At2g24630  
At5g26790  
At3g19570  
At5g46880  
At1g73360  
At2g30820  
At1g68480  
At2g41990  
At4g29240  
At5g56590  
At1g02170  
At2g02540  
At1g17920  
At3g07200  
At1g74420  
At5g10310  
At1g79840  
At1g15000  
At2g37390  
At1g74890

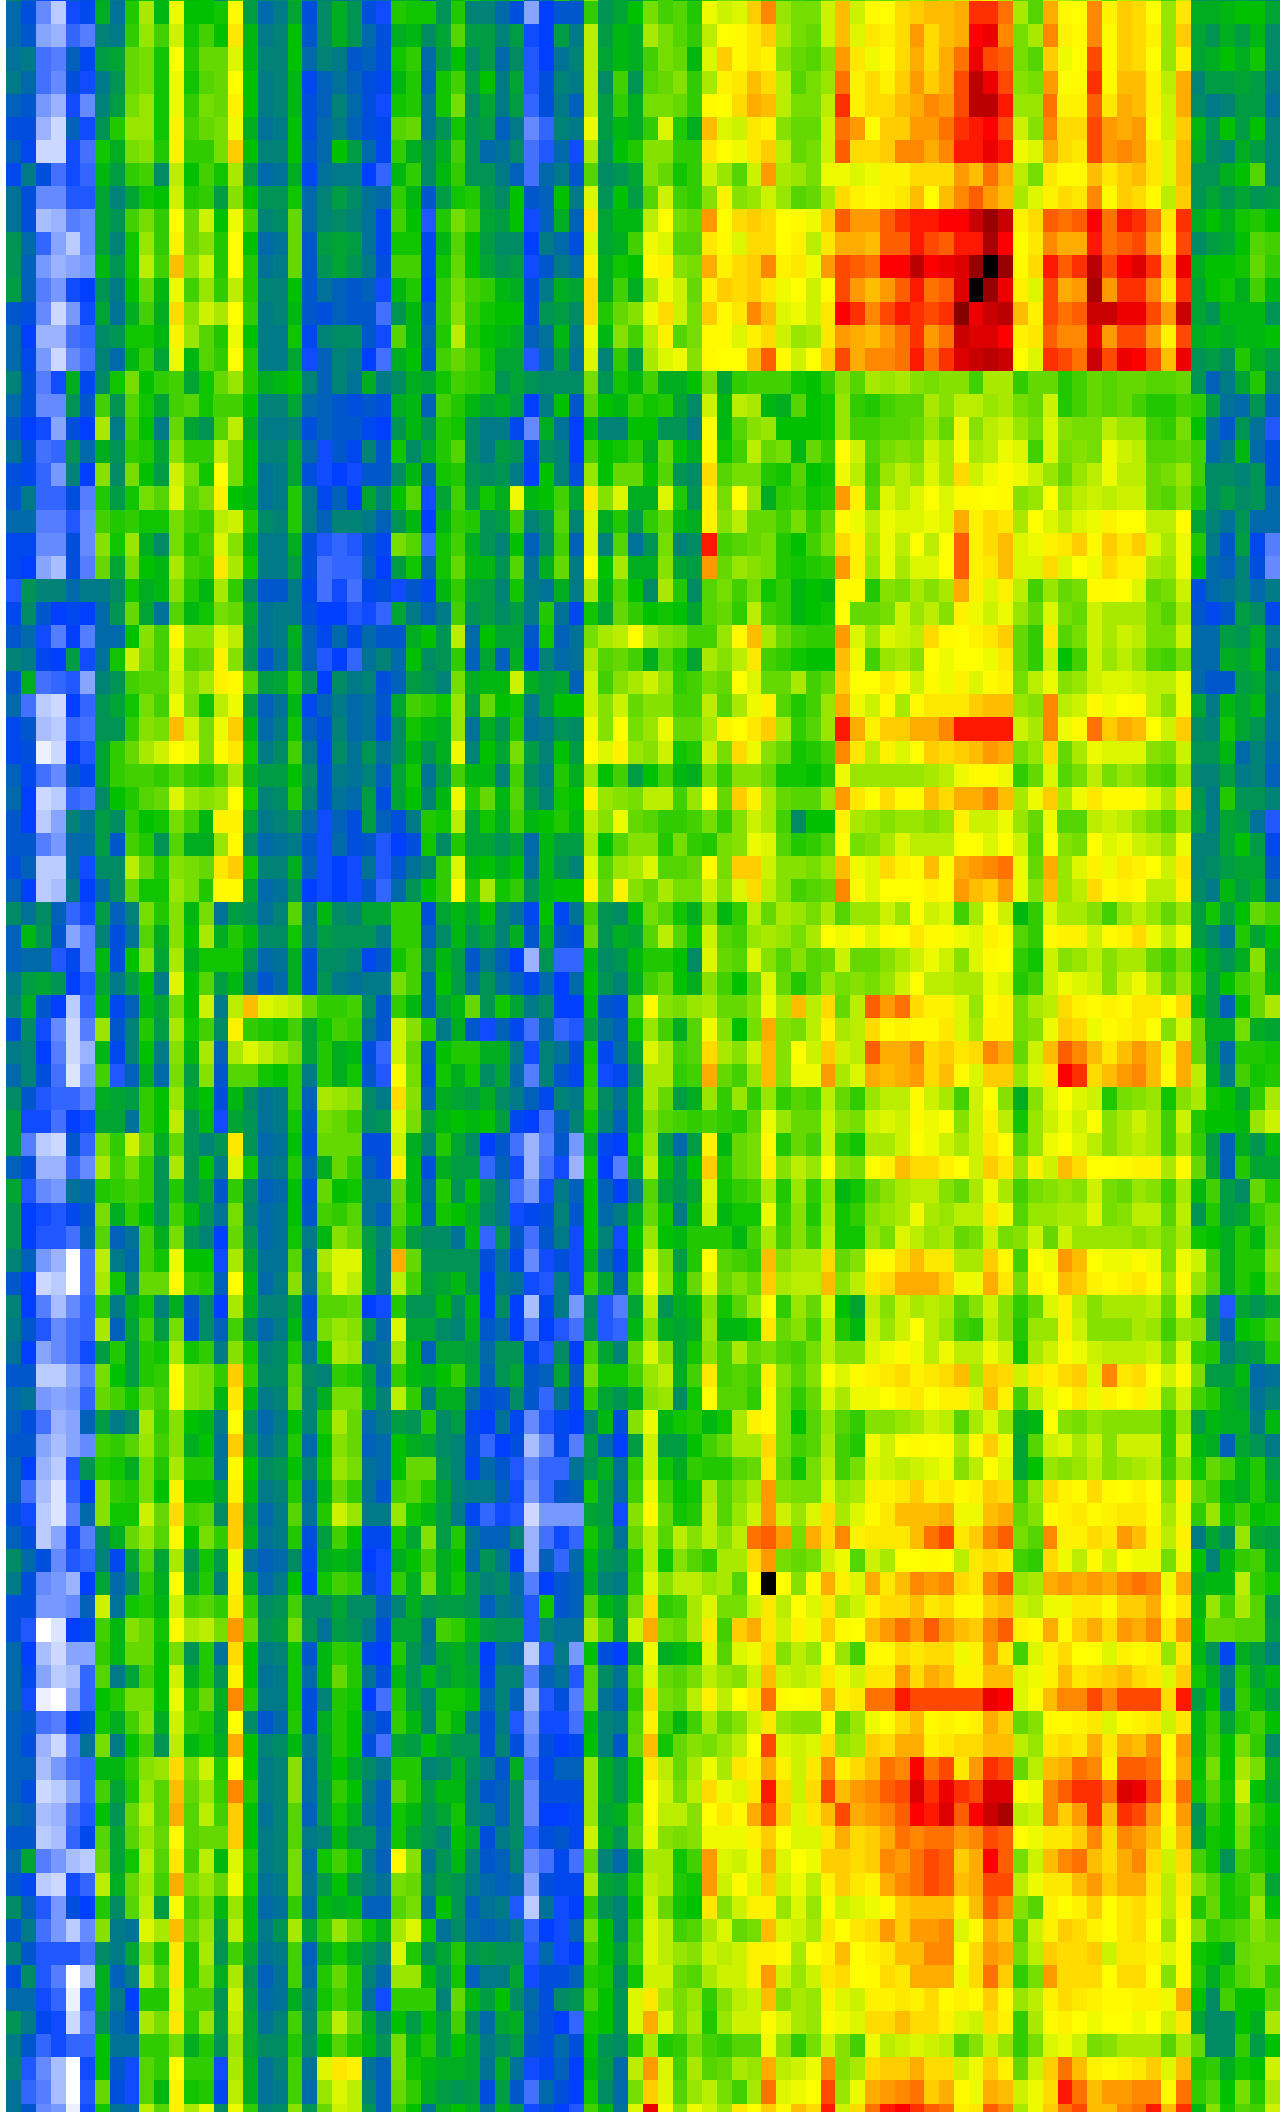

At1g15000  
At2g37390  
At1g74890  
At3g27920  
At5g53210  
At4g28100  
At4g39510  
At4g27760  
At2g37260  
At4g14770  
At5g28290  
At1g15570  
At4g03270  
At5g37890  
At4g00480  
At4g31805  
At2g42920  
At4g26790  
At1g68560  
At2g46420  
At5g67280  
At3g24150  
At3g24630  
At4g21750  
At4g04890  
At1g23220  
At1g13560  
At3g20240  
At5g39710  
At5g07320  
At3g10150  
At1g14410  
At1g16790  
At4g07400  
At3g06660  
At2g31190  
At2g46110  
At2g48120  
At3g61780  
At3g24515  
At1g11220  
At3g61820  
At1g71900  
At2g35190  
At4g14960  
At1g50010  
At1g04820  
At3g11490  
At4g24760  
At3g62390  
At3g06650  
At5g12900  
At1g27210  
At3g56580  
At2g14890  
At3g56130  
At1g62640  
At1g65010  
At5g02280  
At5g63140  
At3g23730  
At1g65290  
At5g10160  
At2g42210  
At1g34010  
At1g60660  
At3g46940  
At3g57220  
At1g47210  
At1g79500  
At5g41760  
At2g05990  
At2g43360  
At5g20060  
At5g16870  
At5g57440  
At5g38300  
At3g62060  
At2g24970  
At1g19950  
At4g22010  
At5g40150  
At2g26260  
At1g13170  
At4g17760  
At3g03220  
At5g57020  
At3g14080  
At1g18550  
At1g10030  
At5g50375  
At5g25210

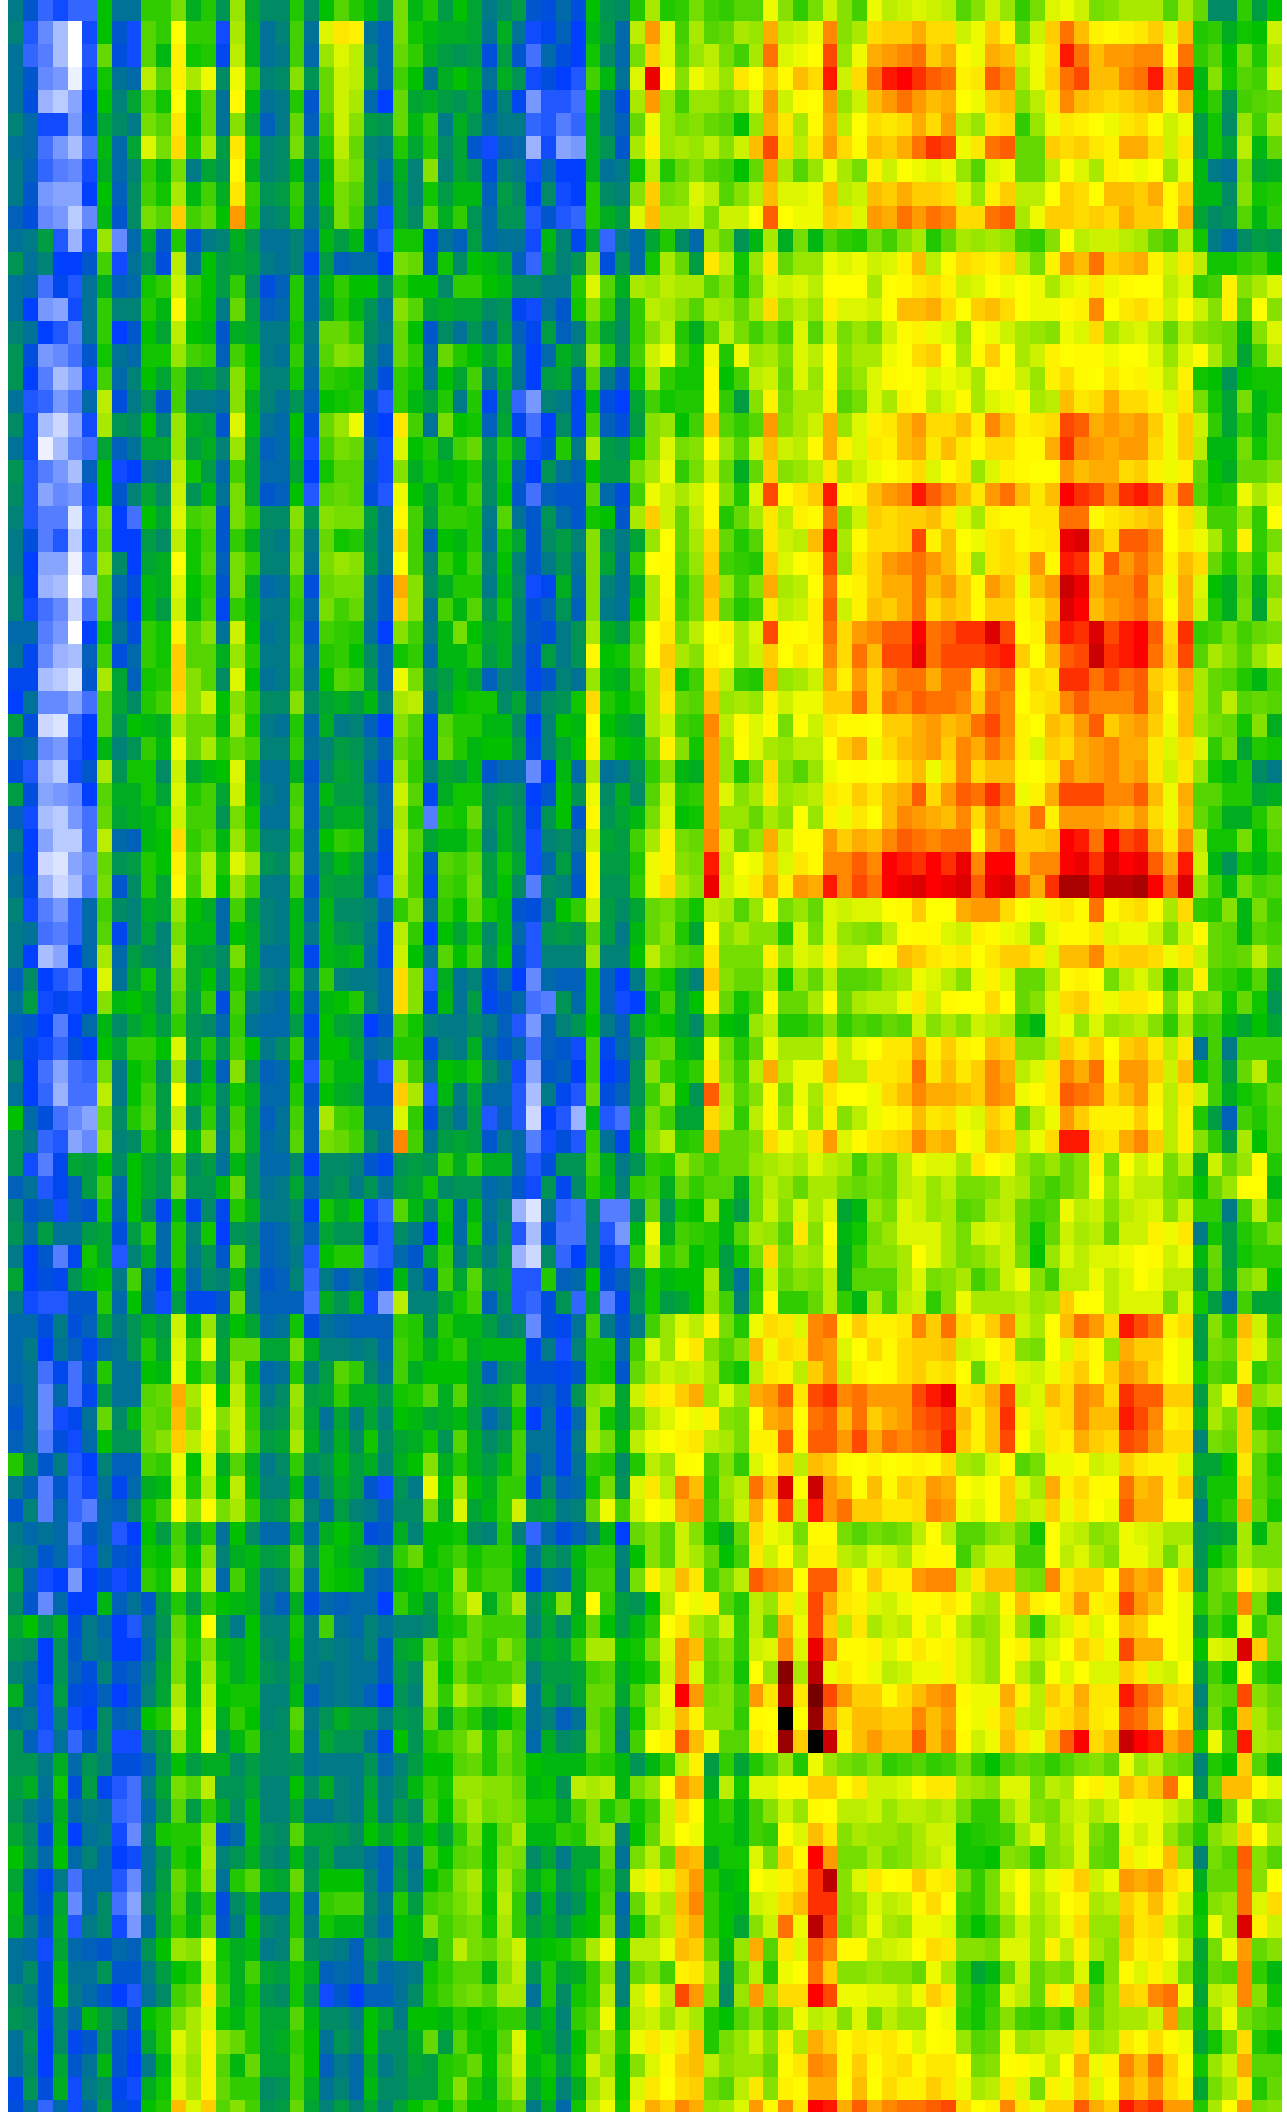

At1g18550  
At1g10030  
At5g50375  
At1g05210  
At3g52940  
At2g20980  
At5g54970  
At3g18000  
At3g18000  
At4g27080  
At4g02500  
At1g33470  
At5g13260  
At5g62890  
At3g06035  
At2g32720  
At3g16200  
At3g24040  
At1g47750  
At2g05920  
At1g78060  
At3g16060  
At3g17430  
At5g23400  
At5g41060  
At5g55480  
At1g49580  
At1g16920  
At1g26090  
At3g07510  
At3g04470  
At3g06140  
At3g61490  
At1g55360  
At4g09160  
At2g24230  
At5g10020  
At1g10850  
At3g08680  
At1g72410  
At3g21190  
At2g41820  
At1g04680  
At1g20090  
At1g03420  
At3g03680  
At5g16000  
At2g26730  
At1g53300  
At1g30690  
At1g52340  
At4g30020  
At1g60070  
At1g50430  
At1g27450  
At3g22190  
At2g07050  
At3g51670  
At5g20590  
At2g26680  
At3g60660  
At3g48490  
At5g52910  
At5g58610  
At1g44835  
At2g38730  
At1g47250  
At3g43690  
At1g66620  
At2g01820  
At5g40460  
At2g44830  
At1g63650  
At1g44900  
At2g17620  
At2g27970  
At2g07672  
At2g47680  
At1g64100  
At5g17980  
At5g02220  
At5g33300  
At2g03220  
At2g42570  
At5g15920  
At2g27880  
At3g21040  
At5g64060  
At3g59190  
At5g61120  
At2g22370  
At1g20410



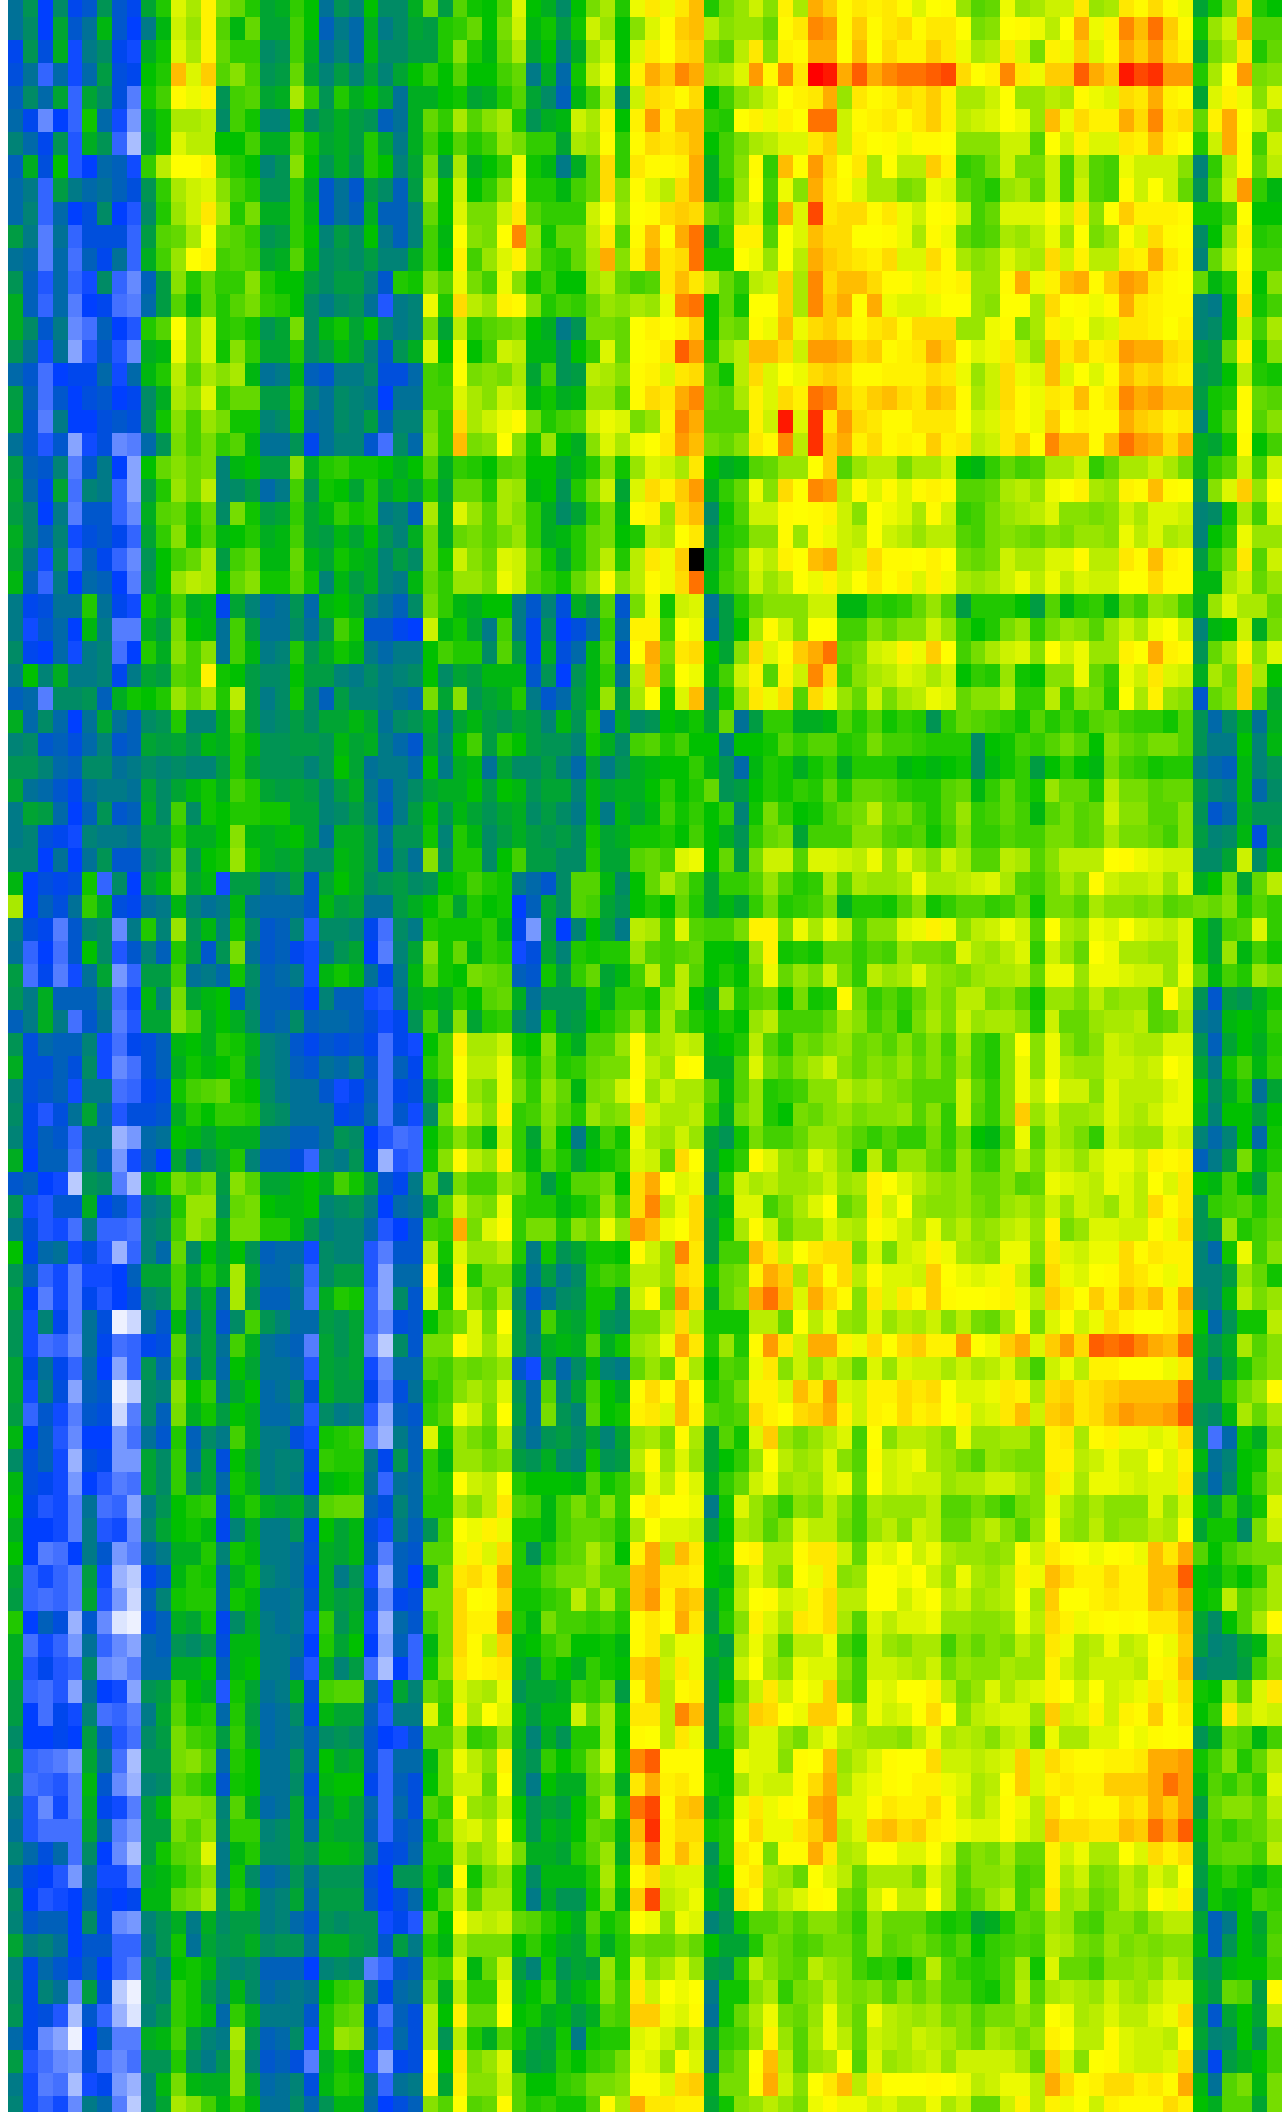

At3g59190  
At5g61120  
At2g22370  
At1g20410  
At5g27430  
At1g20430  
At5g64010  
At2g01640  
At2g03430  
At3g16980  
At5g12980  
At3g15150  
At1g43690  
At2g46040  
At4g12740  
At5g42970  
At4g02750  
At1g79900  
At3g16730  
At1g51510  
At3g13170  
At1g71230  
At5g24630  
At2g07682  
At1g73690  
At2g42700  
At2g32520  
At4g14800  
At2g01720  
At5g50890  
At1g45170  
At2g36610  
At4g16050  
At5g17080  
At5g37860  
At4g38120  
At4g29710  
At4g17380  
At1g06180  
At3g10630  
At3g27230  
At3g07140  
At5g49945  
At3g13235  
At5g20950  
At1g56690  
At4g14050  
At1g43980  
At2g30100  
At1g56450  
At5g56280  
At1g48160  
At1g03150  
At1g07210  
At5g19320  
At2g40290  
At5g27470  
At2g47470  
At2g42910  
At2g32920  
At5g19690  
At1g34130  
At4g39690  
At1g53345  
At5g07400  
At5g01340  
At4g39200  
At4g09520  
At5g44710  
At2g44065  
At5g22790  
At5g49210  
At2g29530  
At3g44330  
At5g16070  
At1g79210  
At3g14290  
At1g67250  
At3g10090  
At3g17300  
At3g49100  
At1g22270  
At4g29430  
At5g16950  
At2g04860  
At1g13060  
At2g33845  
At3g01280  
At4g34870  
At1g30580  
At5g26360  
At1g53850

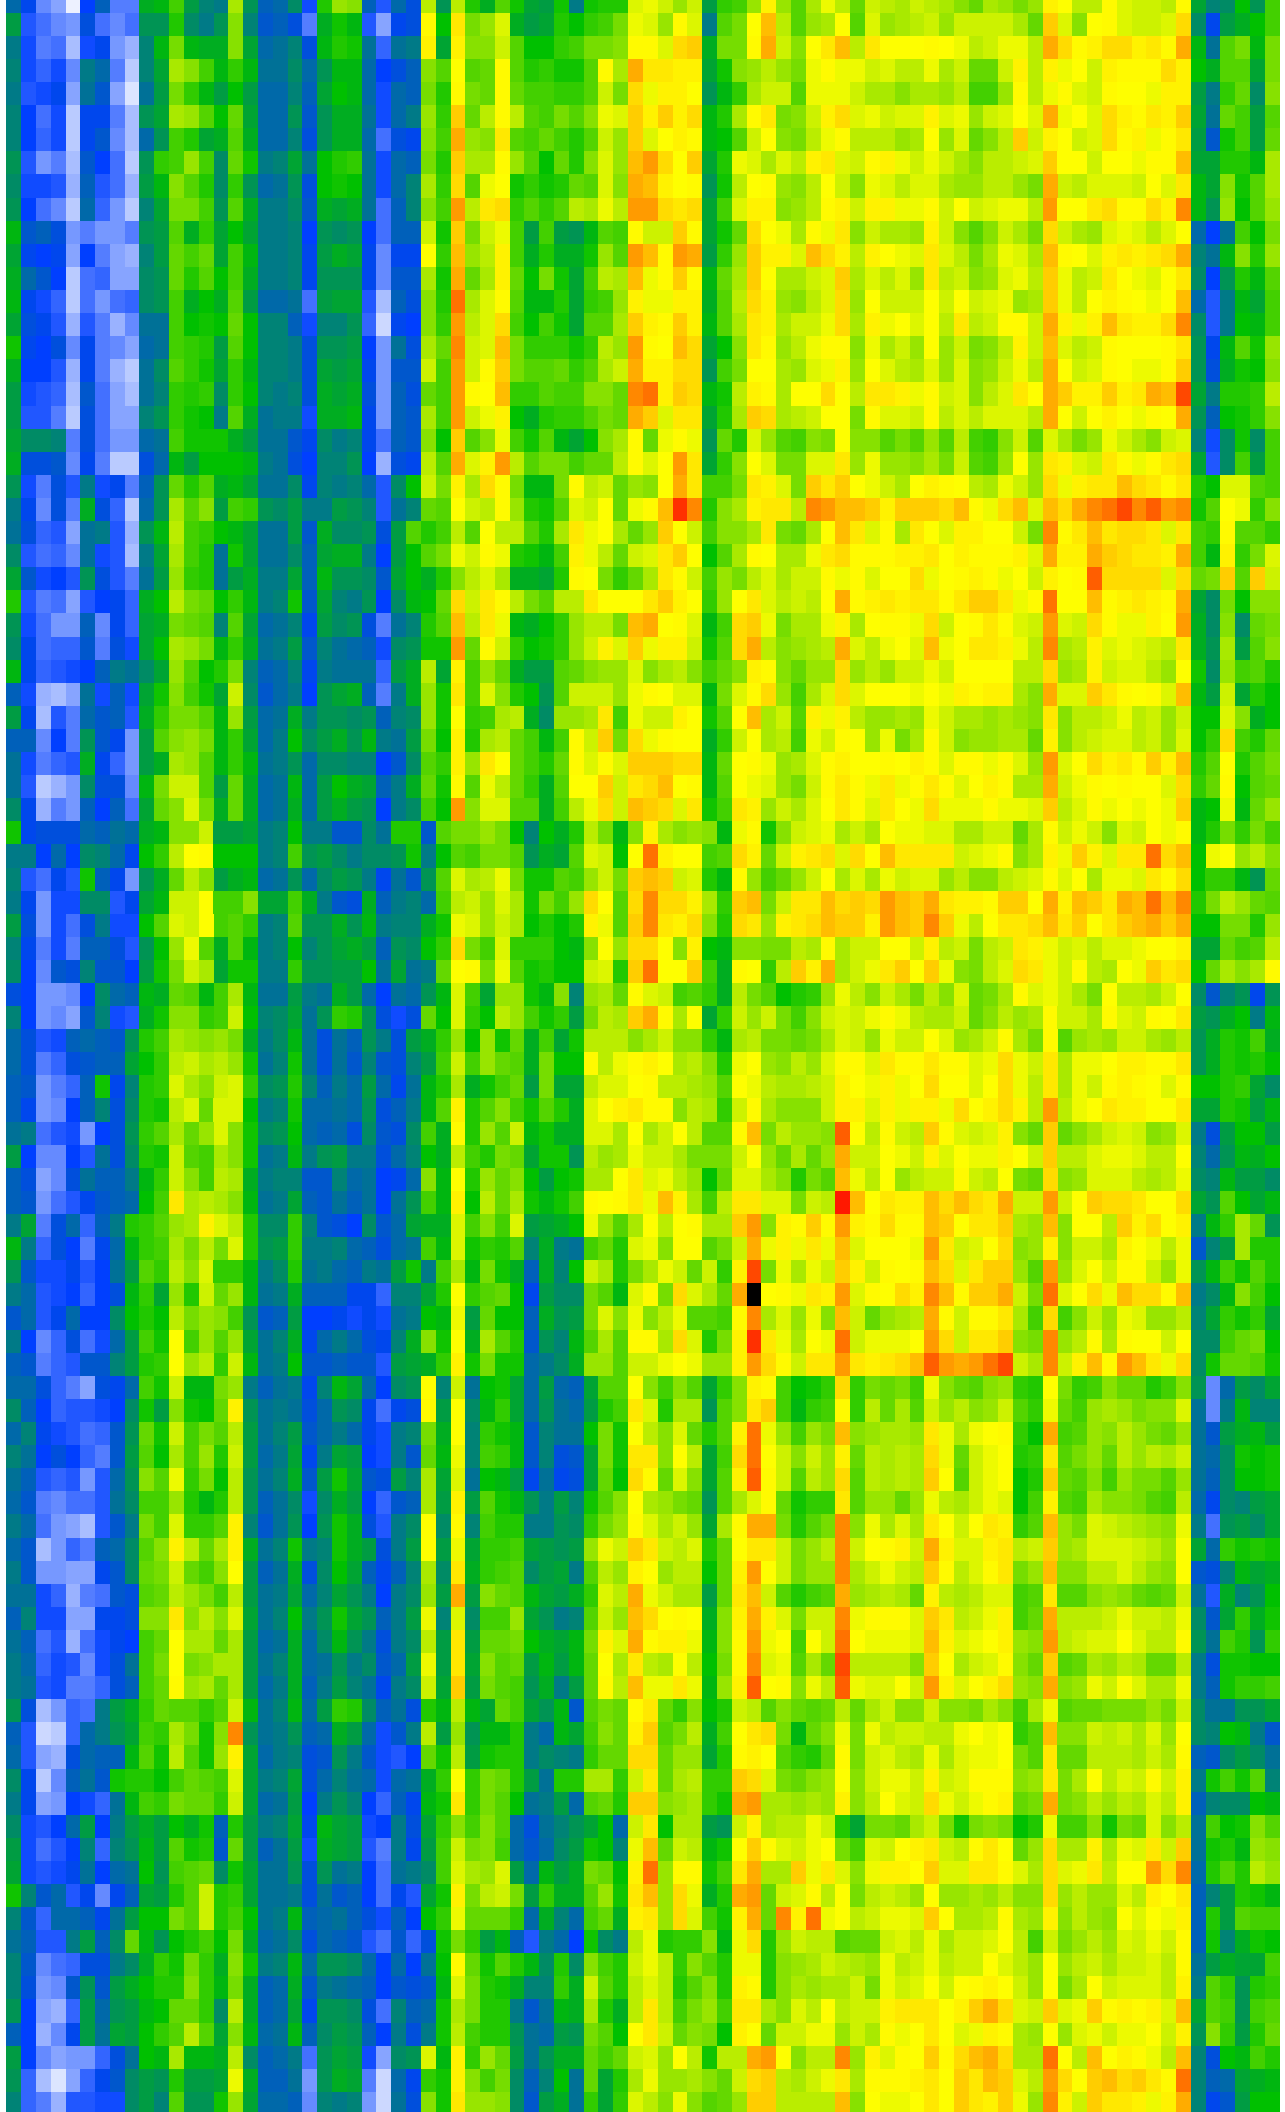

At4g94870  
At1g30580  
At5g26360  
At1g53850  
At1g64520  
At5g45620  
At5g09900  
At4g29390  
At1g70190  
At1g14620  
At3g03060  
At4g02930  
At1g55900  
At5g40770  
At1g53645  
At5g40200  
At4g31810  
At3g20050  
At4g35850  
At3g01800  
At3g61140  
At5g19180  
At4g14110  
At3g10220  
At4g13780  
At1g46264  
At4g35910  
At1g25260  
At5g08620  
At5g21160  
At4g33250  
At3g22680  
At3g22480  
At5g39600  
At5g55190  
At4g34670  
At2g43260  
At3g18880  
At1g03330  
At1g19080  
At4g28470  
At2g32730  
At5g58450  
At3g22110  
At2g35010  
At5g52850  
At4g39530  
At4g04190  
At1g72420  
At5g39960  
At5g56730  
At1g73177  
At4g22380  
At2g45100  
At3g17830  
At1g62150  
At5g27620  
At1g36310  
At1g20370  
At3g61100  
At5g43960  
At3g20330  
At3g57490  
At4g18040  
At2g27840  
At5g09510  
At1g04170  
At1g64790  
At5g23300  
At3g13230  
At5g05480  
At5g20160  
At1g63810  
At1g31660  
At3g21400  
At5g51960  
At5g47320  
At5g01470  
At2g19750  
At3g55170  
At5g28060  
At2g27590  
At2g40780  
At2g45860  
At4g09320  
At1g14320  
At3g04400  
At1g07770  
At4g33865  
At1g49760  
At1g18080  
At4g17520

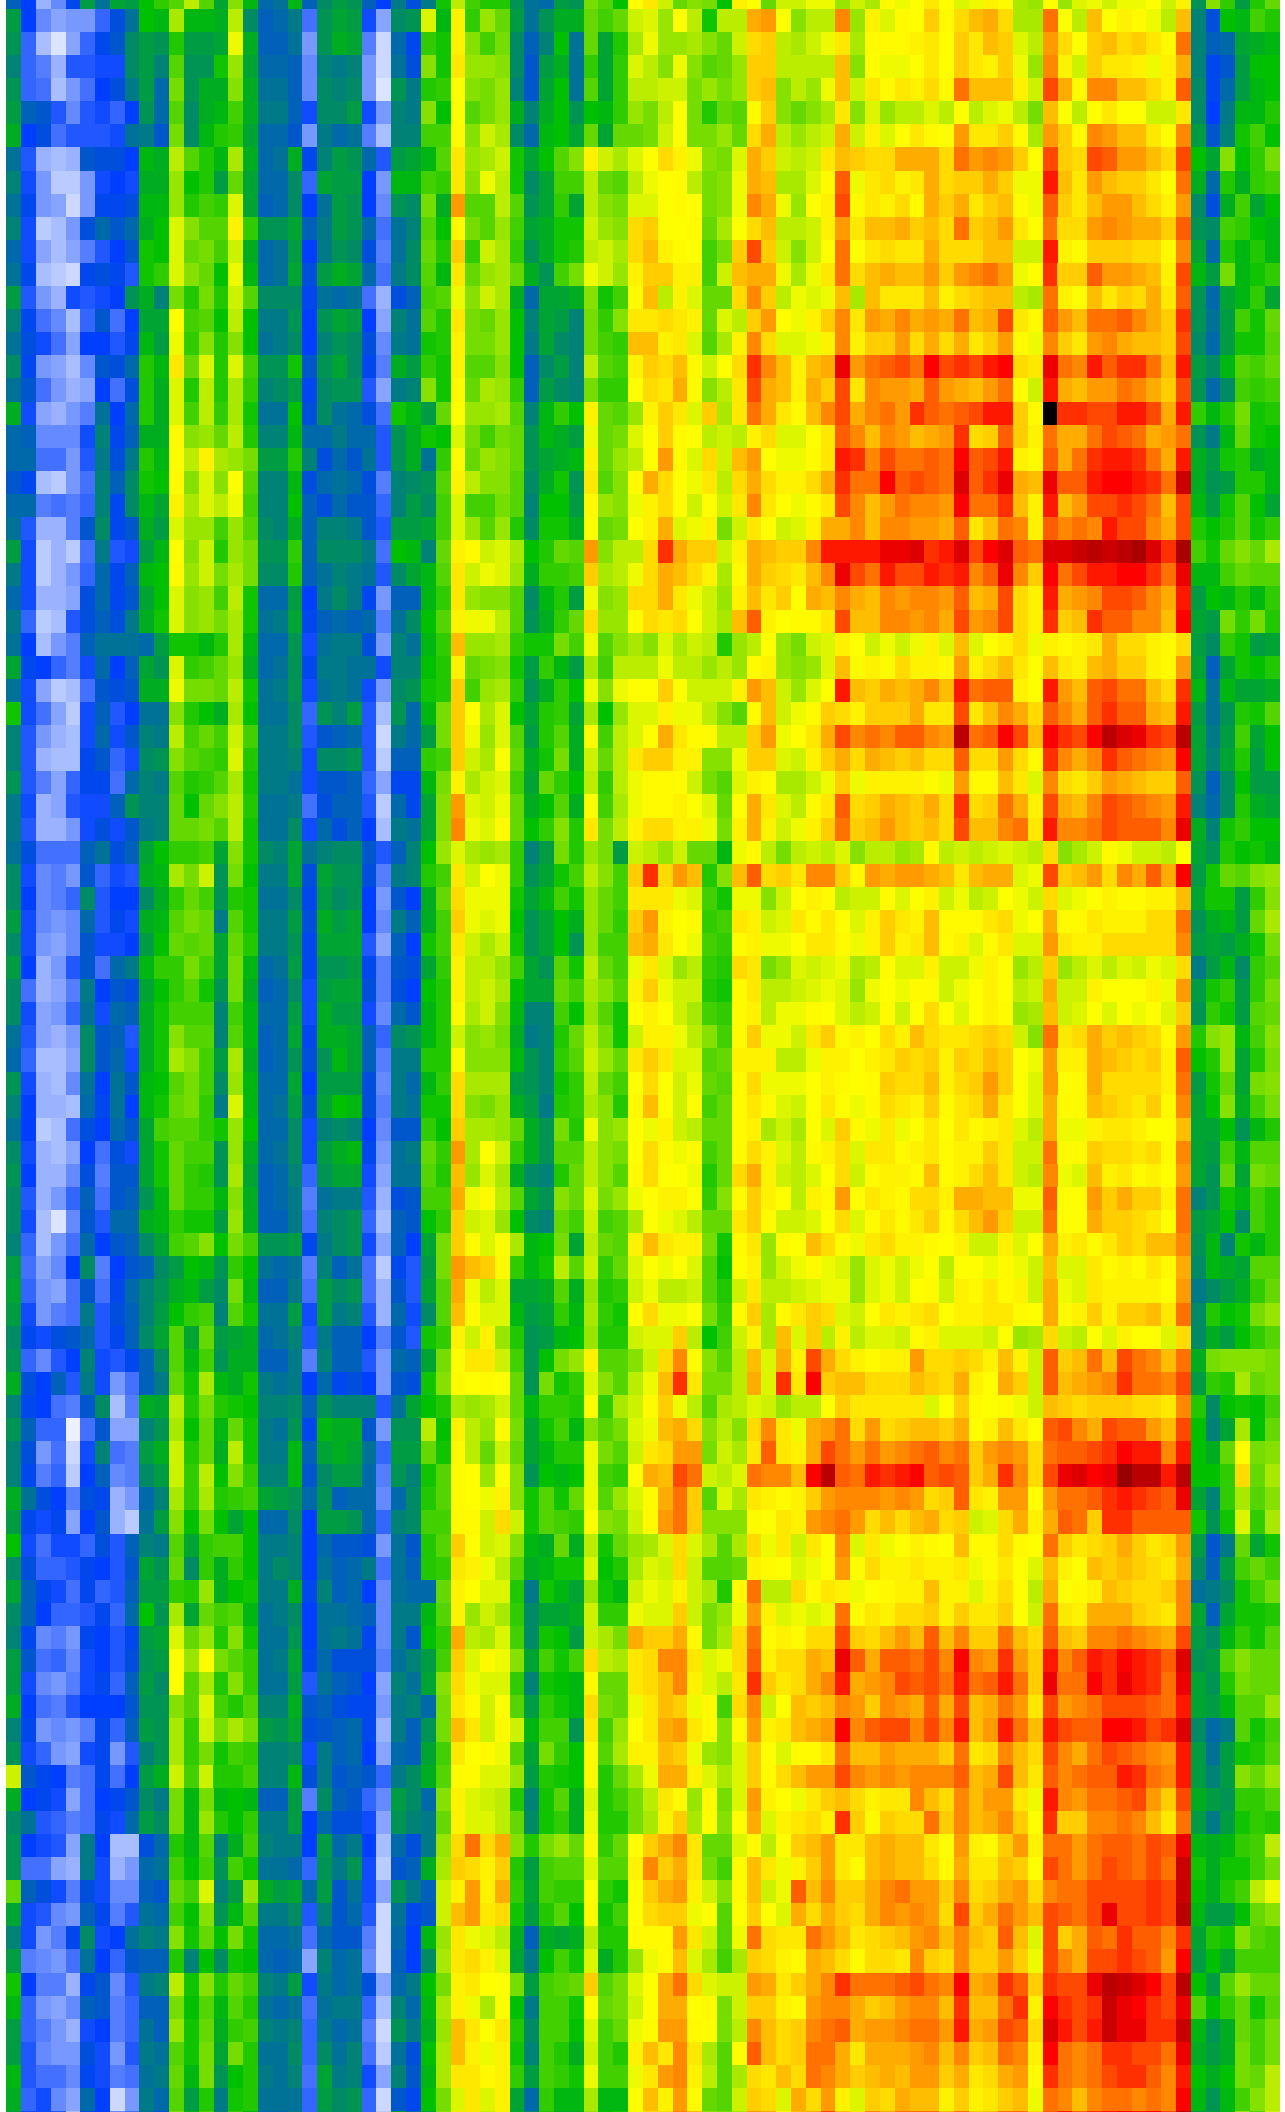

At1g49760  
At1g18080  
At4g17520  
At1g13730  
At3g49080  
At1g19520  
At1g09760  
At3g18190  
At4g20440  
At1g03687  
At1g55890  
At3g14600  
At3g16480  
At2g19670  
At5g65860  
At1g03110  
At3g49080  
At1g47230  
At3g18630  
At1g10230  
At3g29280  
At5g63440  
At5g49020  
At1g77720  
At5g63960  
At4g30220  
At1g72090  
At5g57370  
At3g26540  
At5g48760  
At4g17610  
At1g21690  
At3g59650  
At3g15140  
At3g21110  
At1g72550  
At3g02790  
At2g42740  
At4g31985  
At2g25210  
At3g06700  
At4g18100  
At4g27090  
At3g59540  
At5g27700  
At4g09800  
At1g15930  
At3g02080  
At3g61110  
At5g35530  
At5g10360  
At3g46040  
At1g01100  
At5g08040  
At3g53740  
At1g02780  
At1g52300  
At2g18740  
At4g02840  
At1g65700  
At2g30920  
At1g79650  
At4g32840  
At4g02150  
At3g03110  
At5g63110  
At4g03090  
At2g27470  
At5g64710  
At3g26850  
At1g08580  
At1g13030  
At3g56120  
At3g04680  
At1g08130  
At2g18520  
At4g22970  
At3g55000  
At4g00310  
At1g08780  
At5g56940  
At3g24440  
At2g41650  
At2g23930  
At1g20580  
At5g23880  
At4g28440  
At3g63140  
At2g40660  
At5g51120  
At5g66680

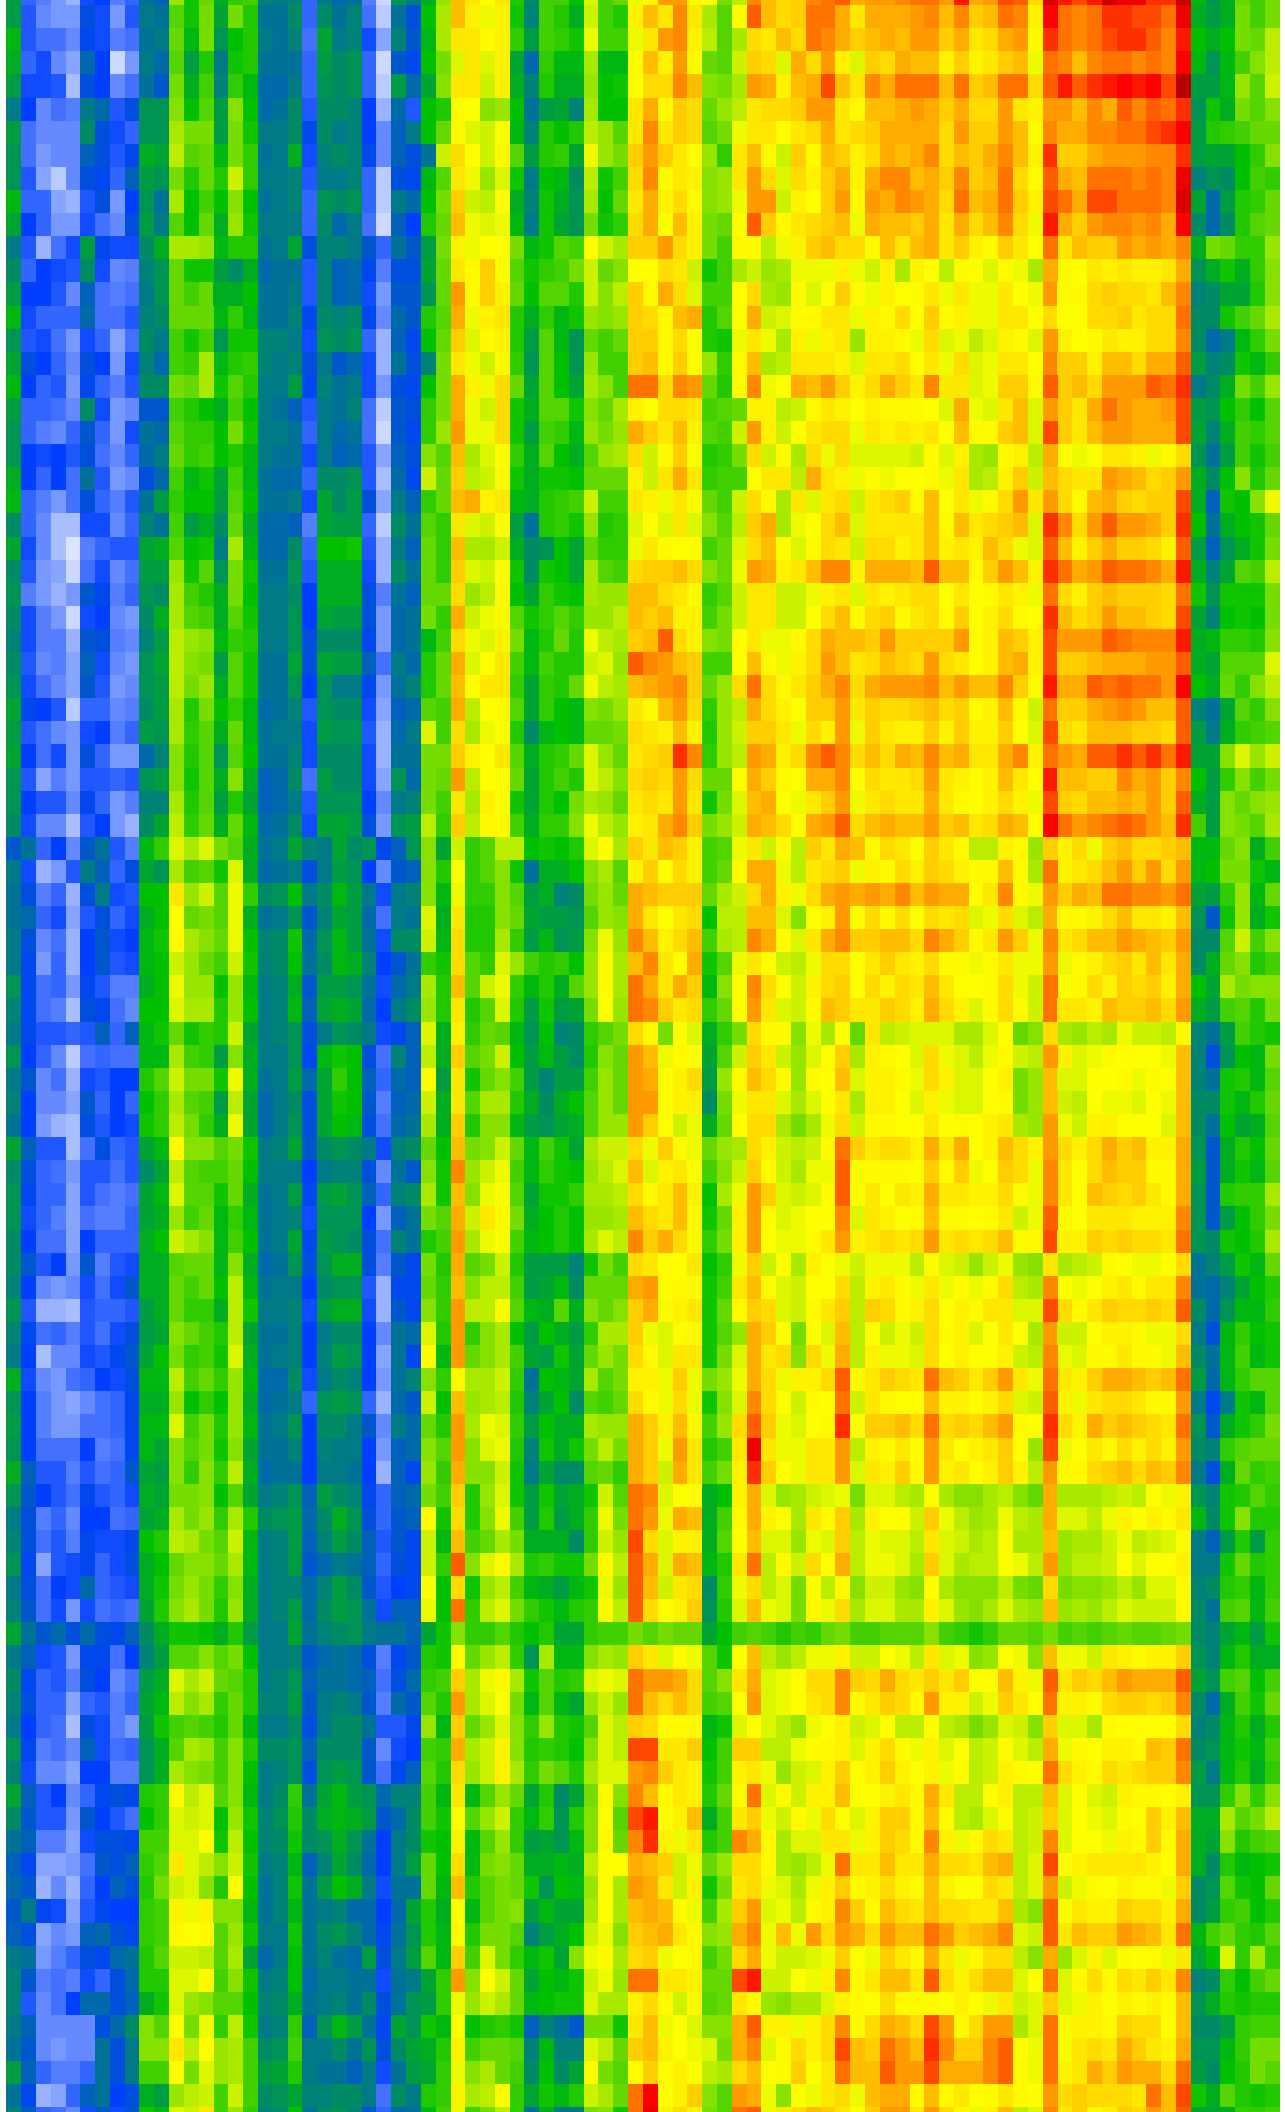

At2g40660  
At5g51120  
At5g66680  
At1g12270  
At2g07340  
At3g18940  
At5g45600  
At5g64670  
At1g26460  
At1g64880  
At5g48870  
At2g47640  
At2g29540  
At3g13860  
At3g02650  
At2g31725  
At2g18330  
At1g26740  
At4g05400  
At5g61030  
At5g54900  
At1g14610  
At1g24510  
At2g47610  
At3g03960  
At1g15820  
At3g23830  
At2g35605  
At1g04190  
At4g30930  
At3g27280  
At1g60770  
At5g26710  
At5g05000  
At3g02530  
At5g20890  
At1g22920  
At4g32610  
At1g80720  
At3g22300  
At3g06930  
At5g02740  
At4g15640  
At4g23620  
At3g05130  
At4g25630  
At3g47370  
At3g58700  
At4g12600  
At1g79150  
At1g56110  
At2g17250  
At5g60960  
At5g08180  
At1g14980  
At1g29250  
At3g52580  
At1g63660  
At2g21580  
At5g26830  
At3g51800  
At3g05060  
At1g77550  
At3g11710  
At4g36420  
At5g23250  
At3g52040  
At3g62940  
At3g46560  
At3g44750  
At2g27610  
At5g47455  
At3g55605  
At1g80270  
At4g13850  
At3g18760  
At3g13160  
At3g19440  
At1g04900  
At3g06040  
At3g11250  
At2g27530  
At5g11630  
At5g50810  
At1g06560  
At1g03360  
At1g75980  
At5g06000  
At2g20710  
At3g07060  
At1g09660

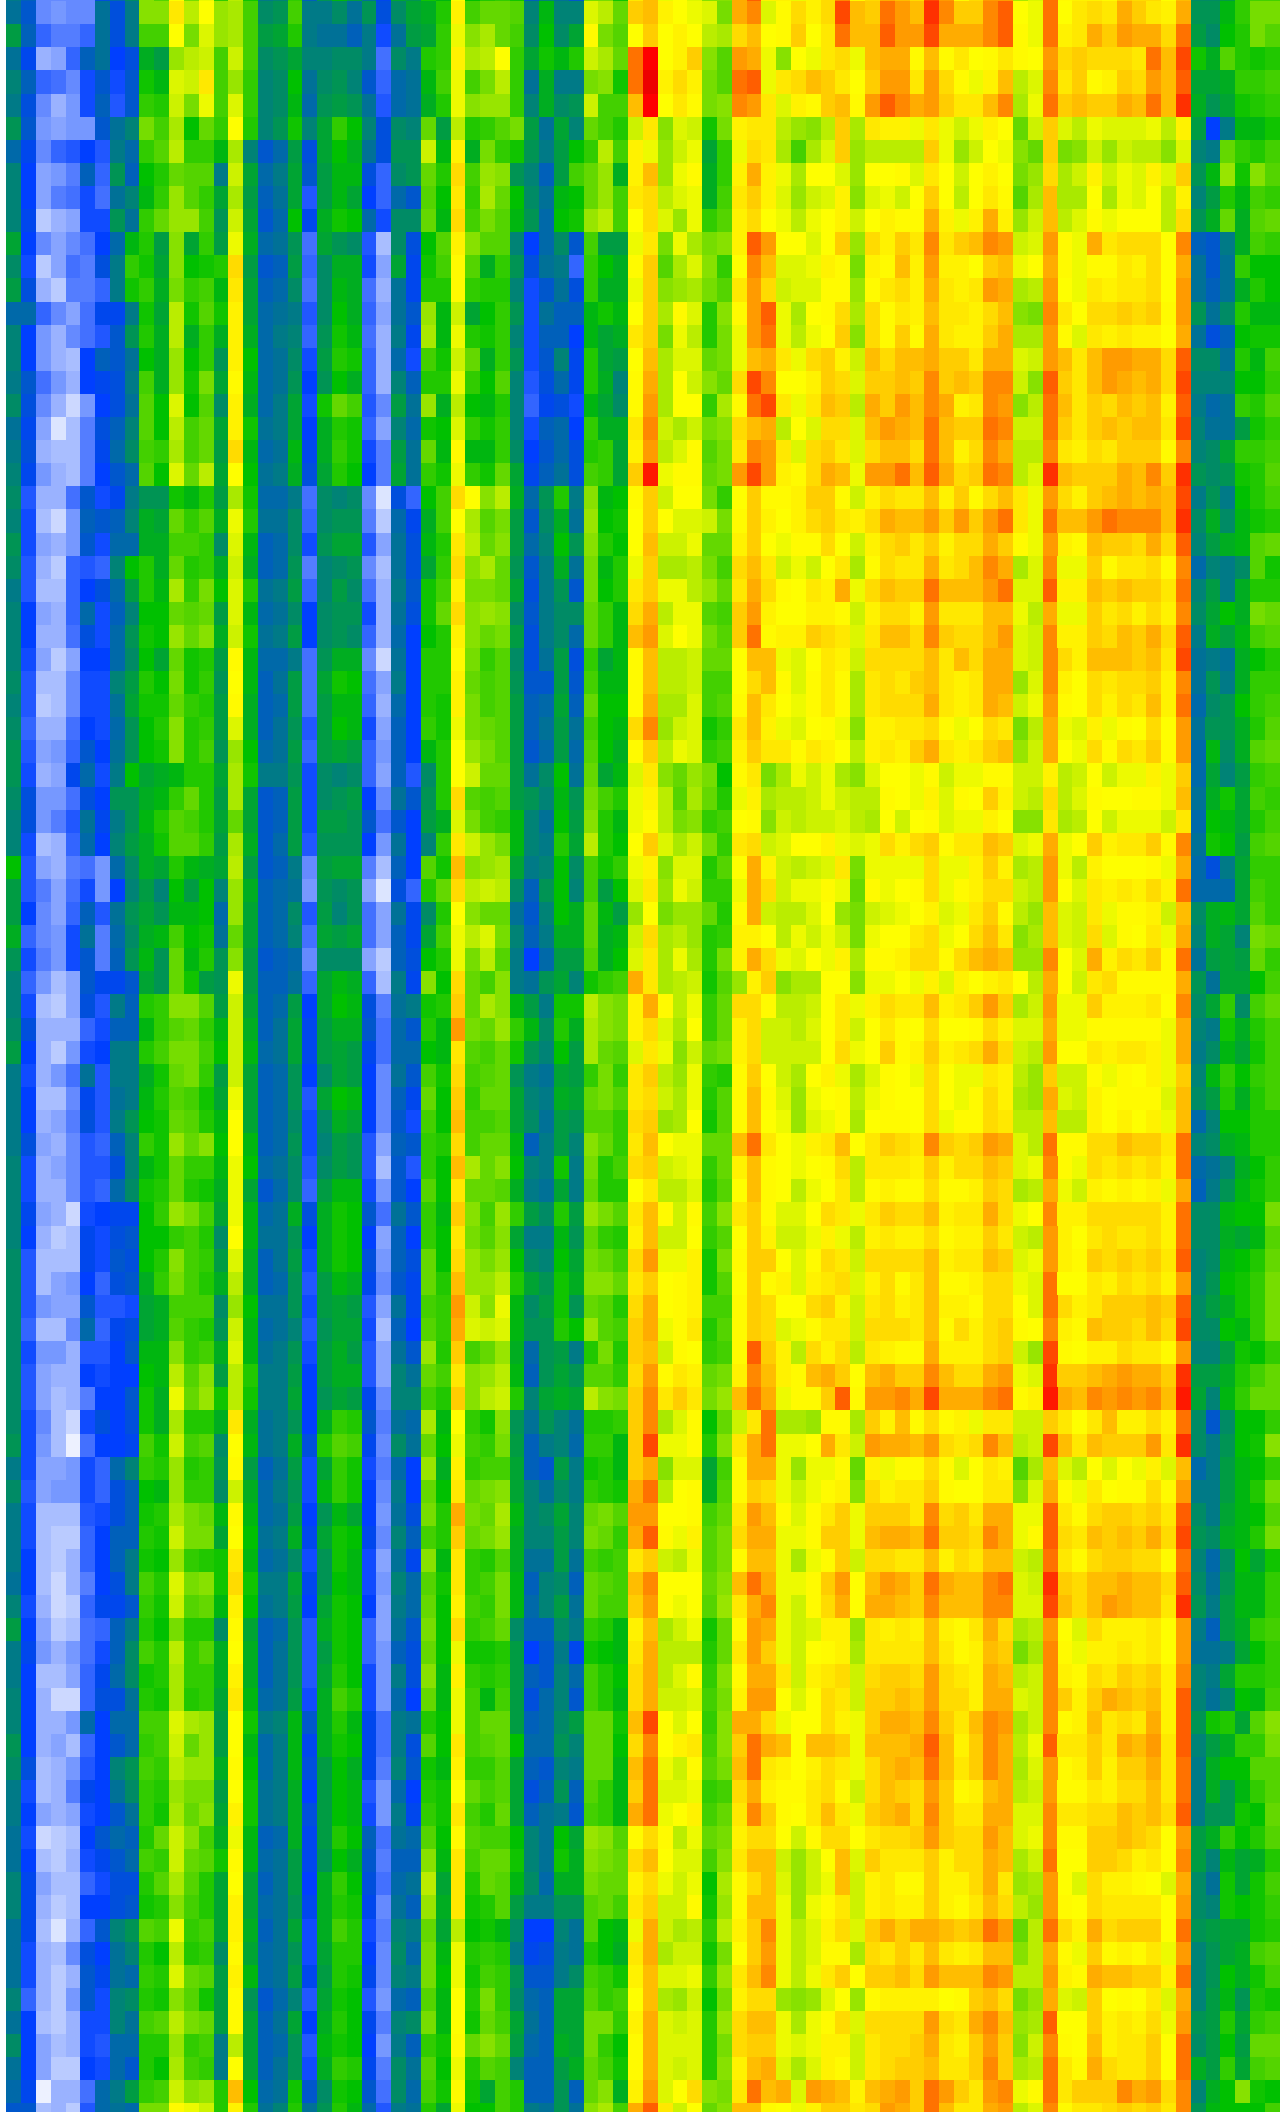

At2g20710  
At3g07060  
At1g09660  
At4g30800  
At2g37510  
At3g19080  
At5g43720  
At5g23900  
At2g17360  
At2g41840  
At1g31860  
At4g26300  
At5g02870  
At4g39880  
At3g18130  
At3g53890  
At5g67510  
At1g48630  
At2g36620  
At5g61170  
At3g10610  
At4g14320  
At5g56670  
At3g24830  
At5g07090  
At3g06680  
At4g26230  
At3g16080  
At3g05560  
At4g15000  
At2g01250  
At5g47930  
At3g22230  
At3g60245  
At5g15200  
At3g52590  
At3g09500  
At3g09630  
At5g39740  
At3g49910  
At5g02450  
At5g27770  
At3g12390  
At2g36160  
At1g72370  
At3g09200  
At5g41520  
At4g16720  
At3g62870  
At3g60770  
At5g56710  
At3g49010  
At1g67430  
At2g19730  
At5g27850  
At3g53020  
At5g57290  
At1g08360  
At2g20450  
At3g44590  
At1g19525  
At1g16870  
At5g22440  
At1g34030  
At5g58420  
At4g29410  
At1g27400  
At3g05590  
At4g10470  
At2g32060  
At3g25520  
At5g59850  
At5g16130  
At1g18540  
At2g36170  
At3g48930  
At3g56340  
At3g23390  
At1g26880  
At2g27720  
At3g04920  
At2g44120  
At3g07110  
At5g47700  
At5g60670  
At1g04480  
At2g33370  
At3g02560  
At1g22780  
At2g37190  
At1g48830  
At5g61140

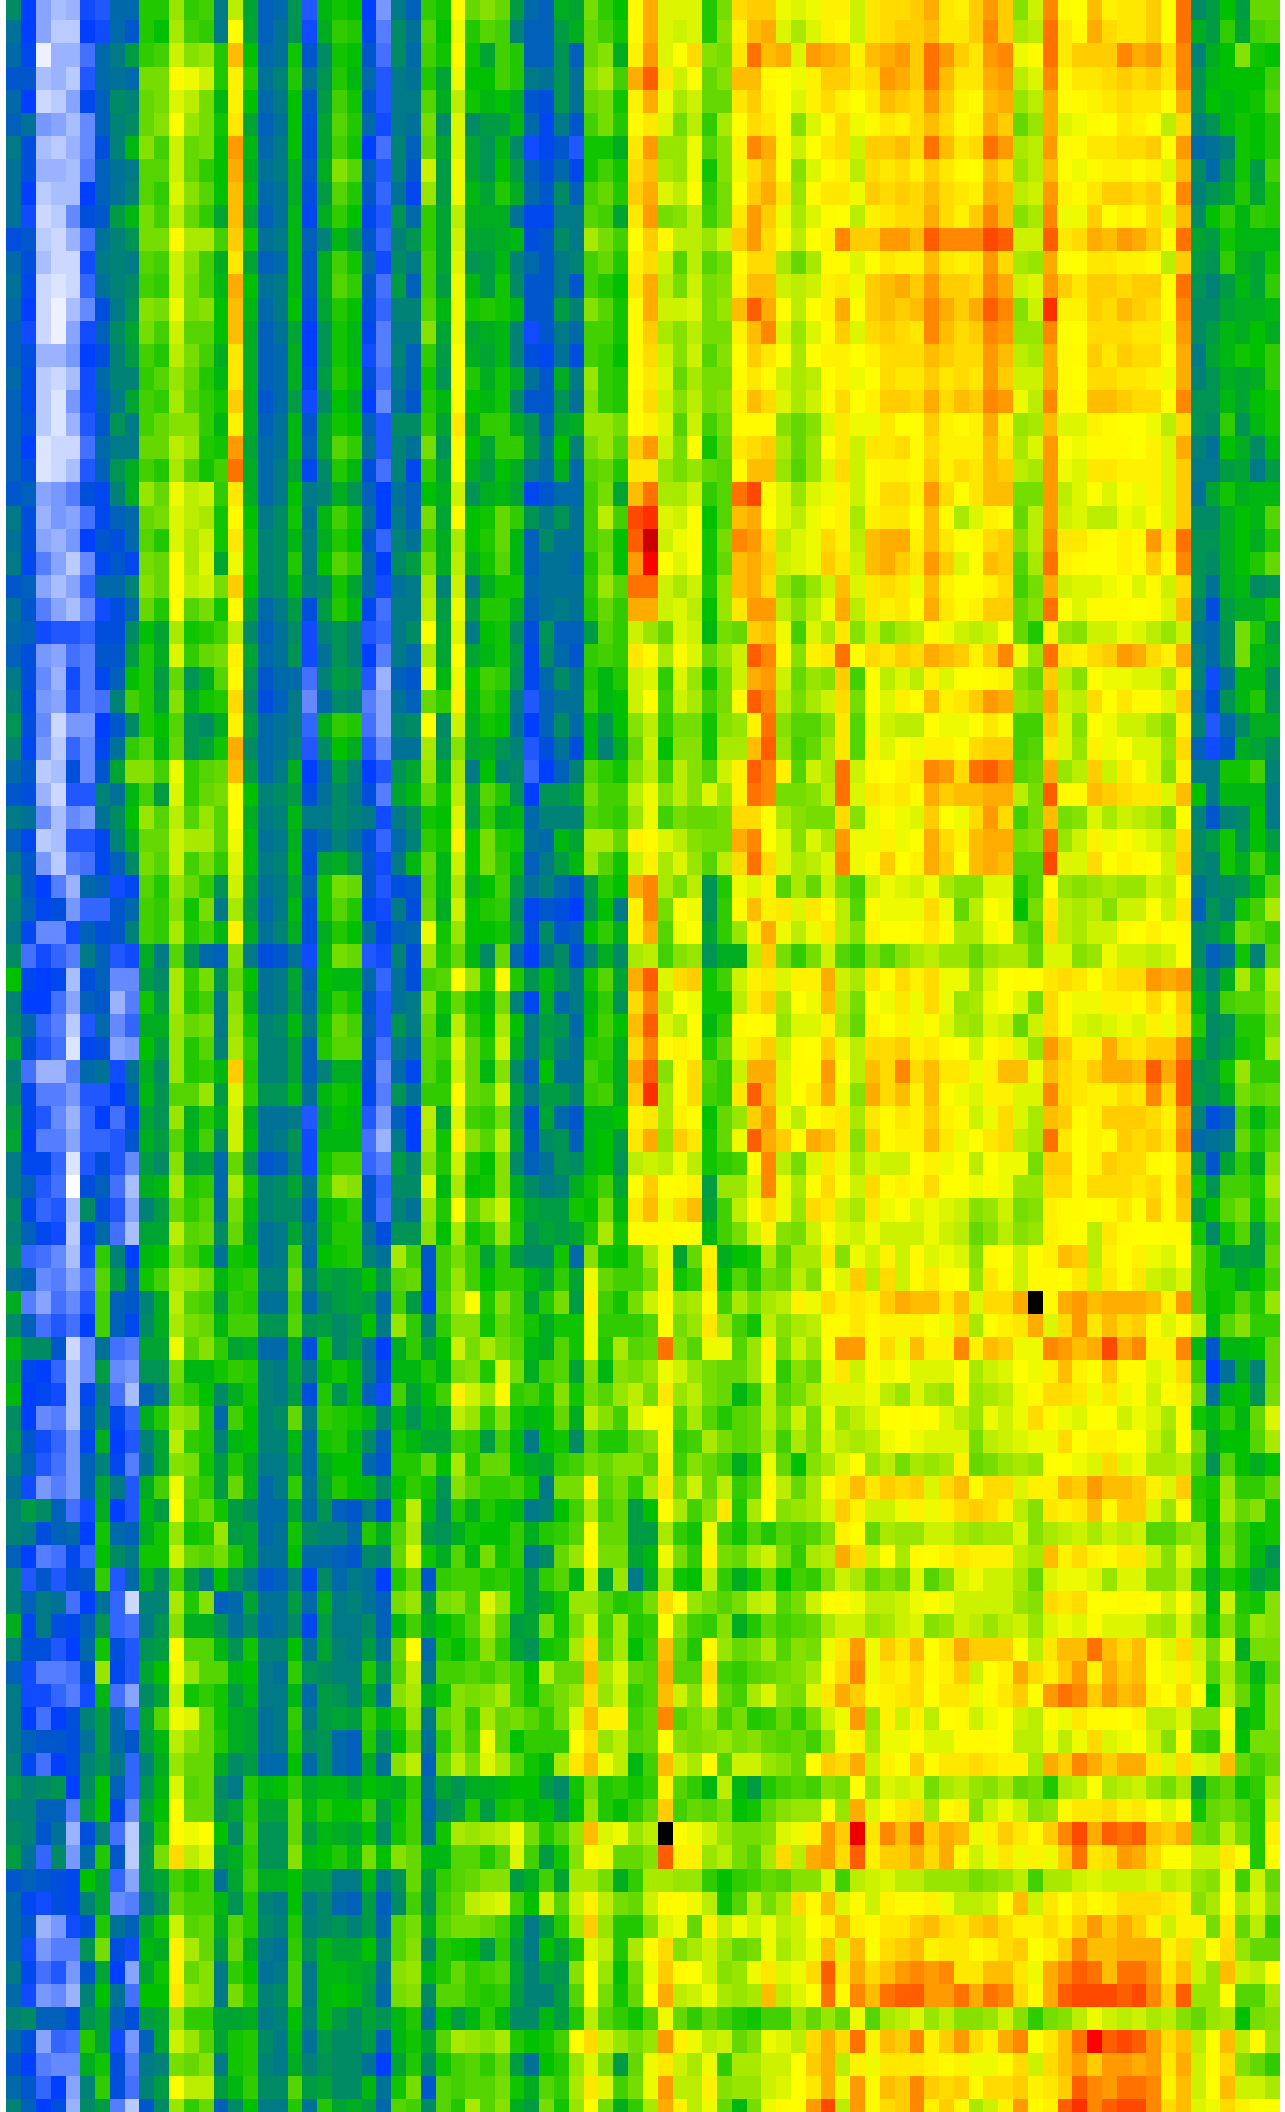

At1g22780  
At2g37190  
At1g48830  
At5g64140  
At5g03850  
At2g27710  
At3g04840  
At4g31700  
At2g39460  
At5g23740  
At5g52650  
At1g04270  
At4g17390  
At3g28900  
At4g25740  
At3g53430  
At2g34480  
At3g11510  
At4g00100  
At1g73230  
At1g17880  
At5g02610  
At3g55280  
At1g07070  
At1g26910  
At1g28395  
At4g10450  
At2g42710  
At3g55010  
At4g26900  
At3g27740  
At2g23350  
At3g23940  
At5g10920  
At1g09660  
At4g30680  
At2g37600  
At5g53070  
At1g16000  
At2g39390  
At3g52390  
At3g27430  
At5g64760  
At4g21150  
At5g50370  
At2g34050  
At1g76400  
At5g10240  
At2g33210  
At3g16780  
At5g05780  
At5g63400  
At5g11340  
At1g77440  
At5g06270  
At4g23440  
At1g53050  
At1g65920  
At1g53380  
At3g58580  
At5g03670  
At1g10750  
At2g03090  
At4g38210  
At2g42290  
At3g19540  
At1g63700  
At5g18960  
At3g55260  
At1g50370  
At3g22180  
At3g12590  
At2g40070  
At5g06680  
At4g35530  
At5g22710  
At5g26200  
At5g35870  
At5g03840  
At3g24810  
At3g53340  
At1g16570  
At3g60740  
At5g19090  
At5g23550  
At3g26370  
At1g21710  
At1g52700  
At3g07410  
At4g29870  
At2g40640  
At2g32280

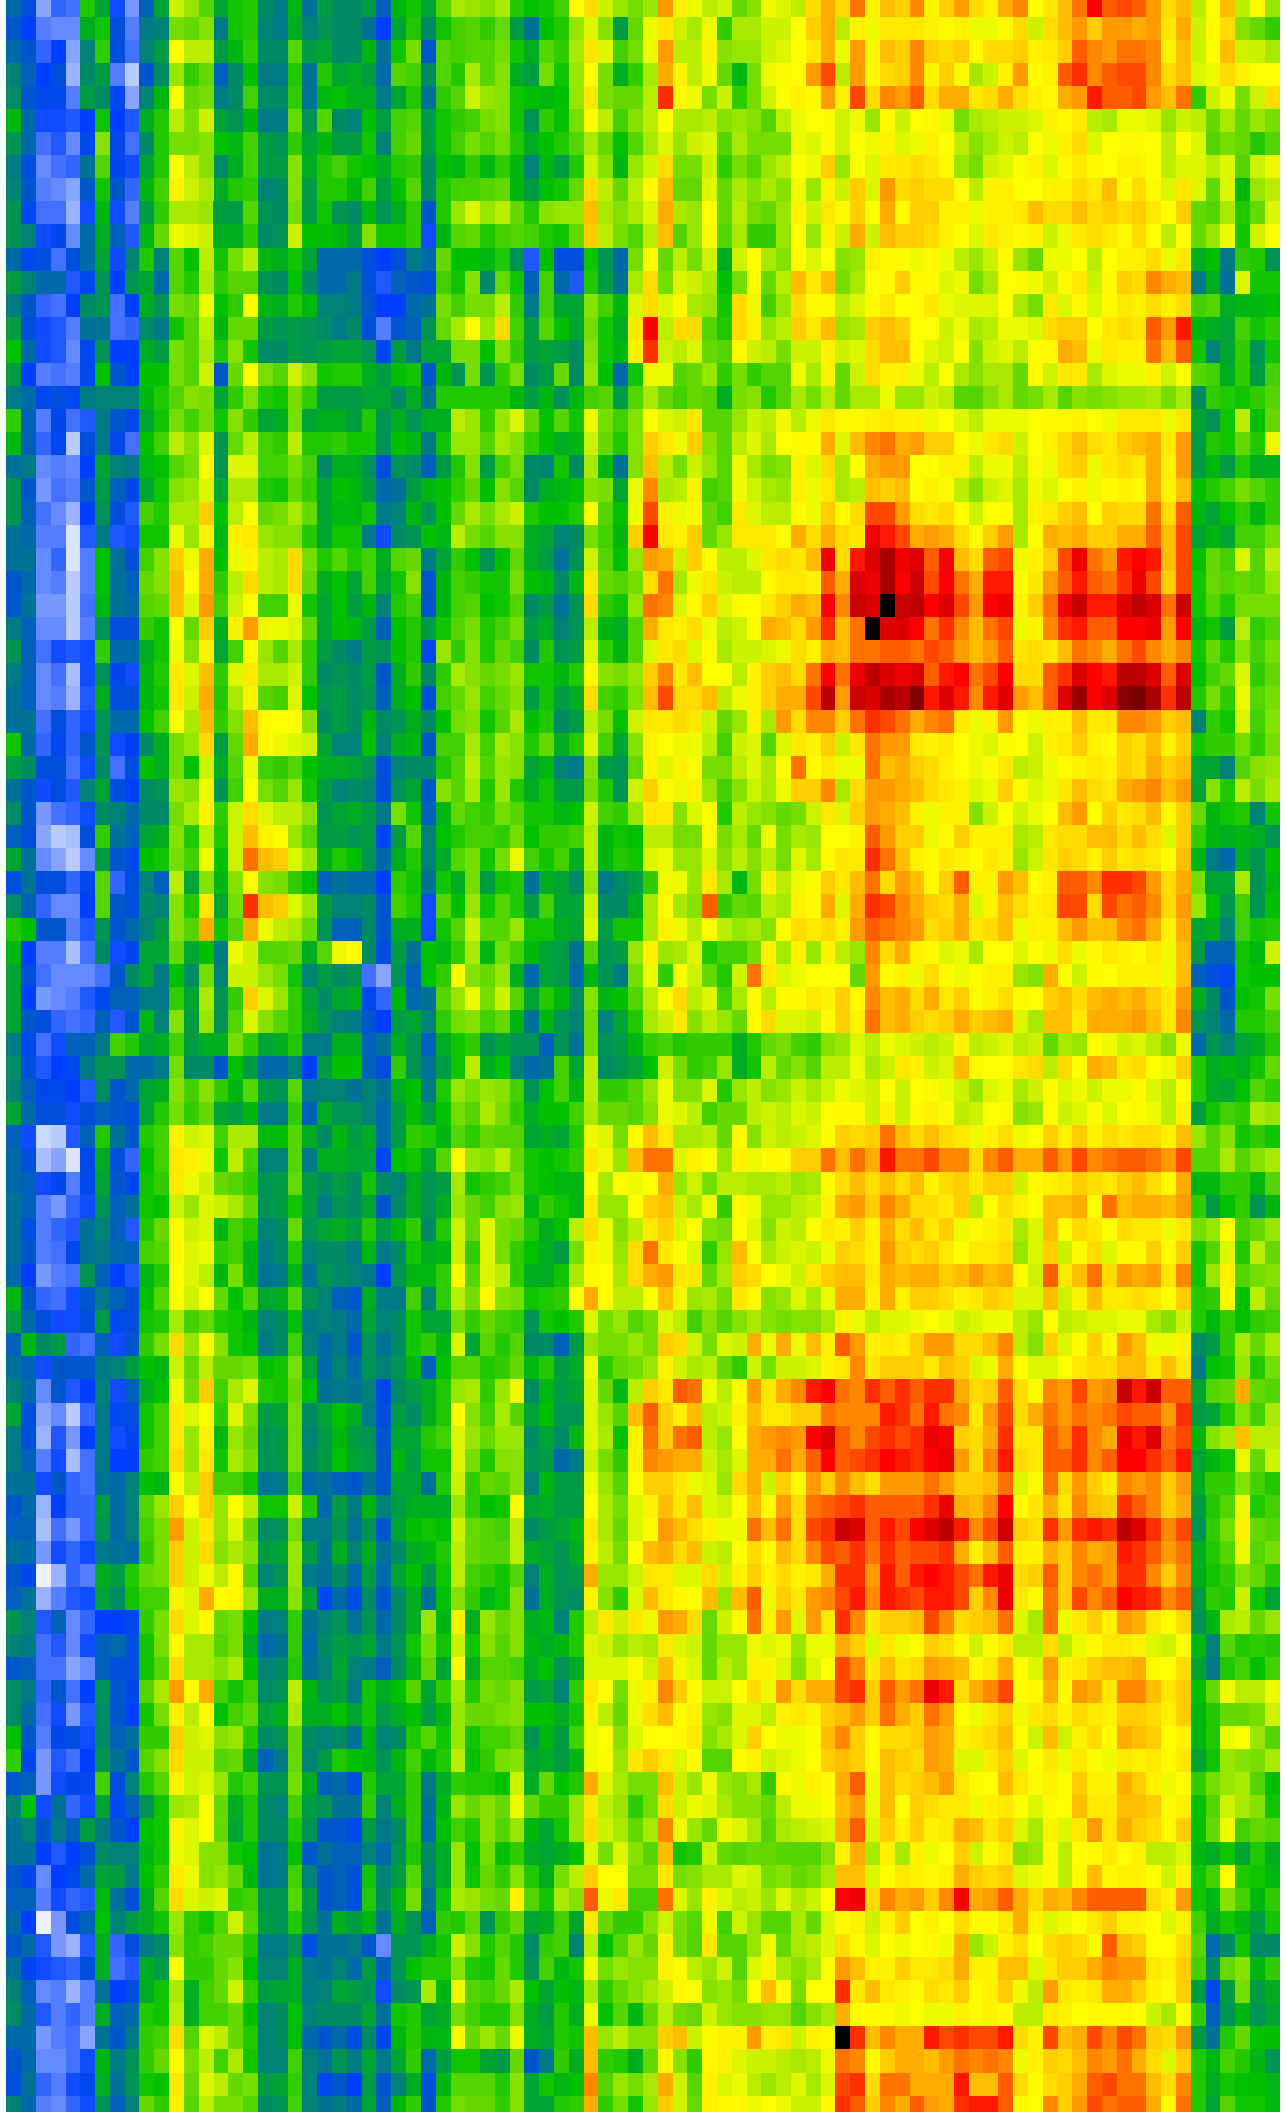

At3g07410  
At4g29870  
At2g40640  
At2g32280  
At5g48170  
At1g34270  
At2g16250  
At5g59020  
At4g11450  
At3g14000  
At2g37590  
At1g42480  
At3g52640  
At3g25220  
At2g20480  
At2g33640  
At4g22850  
At1g44740  
At5g10900  
At1g03180  
At4g28190  
At2g35160  
At1g68120  
At5g66410  
At5g05510  
At5g02370  
At1g16330  
At3g01330  
At2g31650  
At2g45490  
At2g44190  
At1g35530  
At1g14970  
At2g38580  
At4g34840  
At2g41050  
At1g71790  
At5g58530  
At5g25510  
At1g80280  
At1g77250  
At5g65930  
At1g20220  
At1g12370  
At1g29630  
At2g18120  
At2g45160  
At4g12640  
At3g27130  
At4g33410  
At5g17620  
At5g42700  
At1g26190  
At5g64950  
At3g18910  
At5g23290  
At3g02680  
At1g03540  
At3g16870  
At1g04650  
At5g25580  
At4g40000  
At2g01120  
At1g27880  
At5g65120  
At4g01270  
At3g42660  
At3g48480  
At1g67690  
At5g64980  
At4g30840  
At5g37530  
At1g24310  
At4g18470  
At5g27680  
At2g22530  
At1g05055  
At4g38050  
At1g75310  
At5g63135  
At1g11120  
At5g22730  
At4g33200  
At3g12010  
At1g01300  
At1g07705  
At5g22750  
At5g11470  
At3g12280  
At5g52860  
At5g55760  
At5g49120

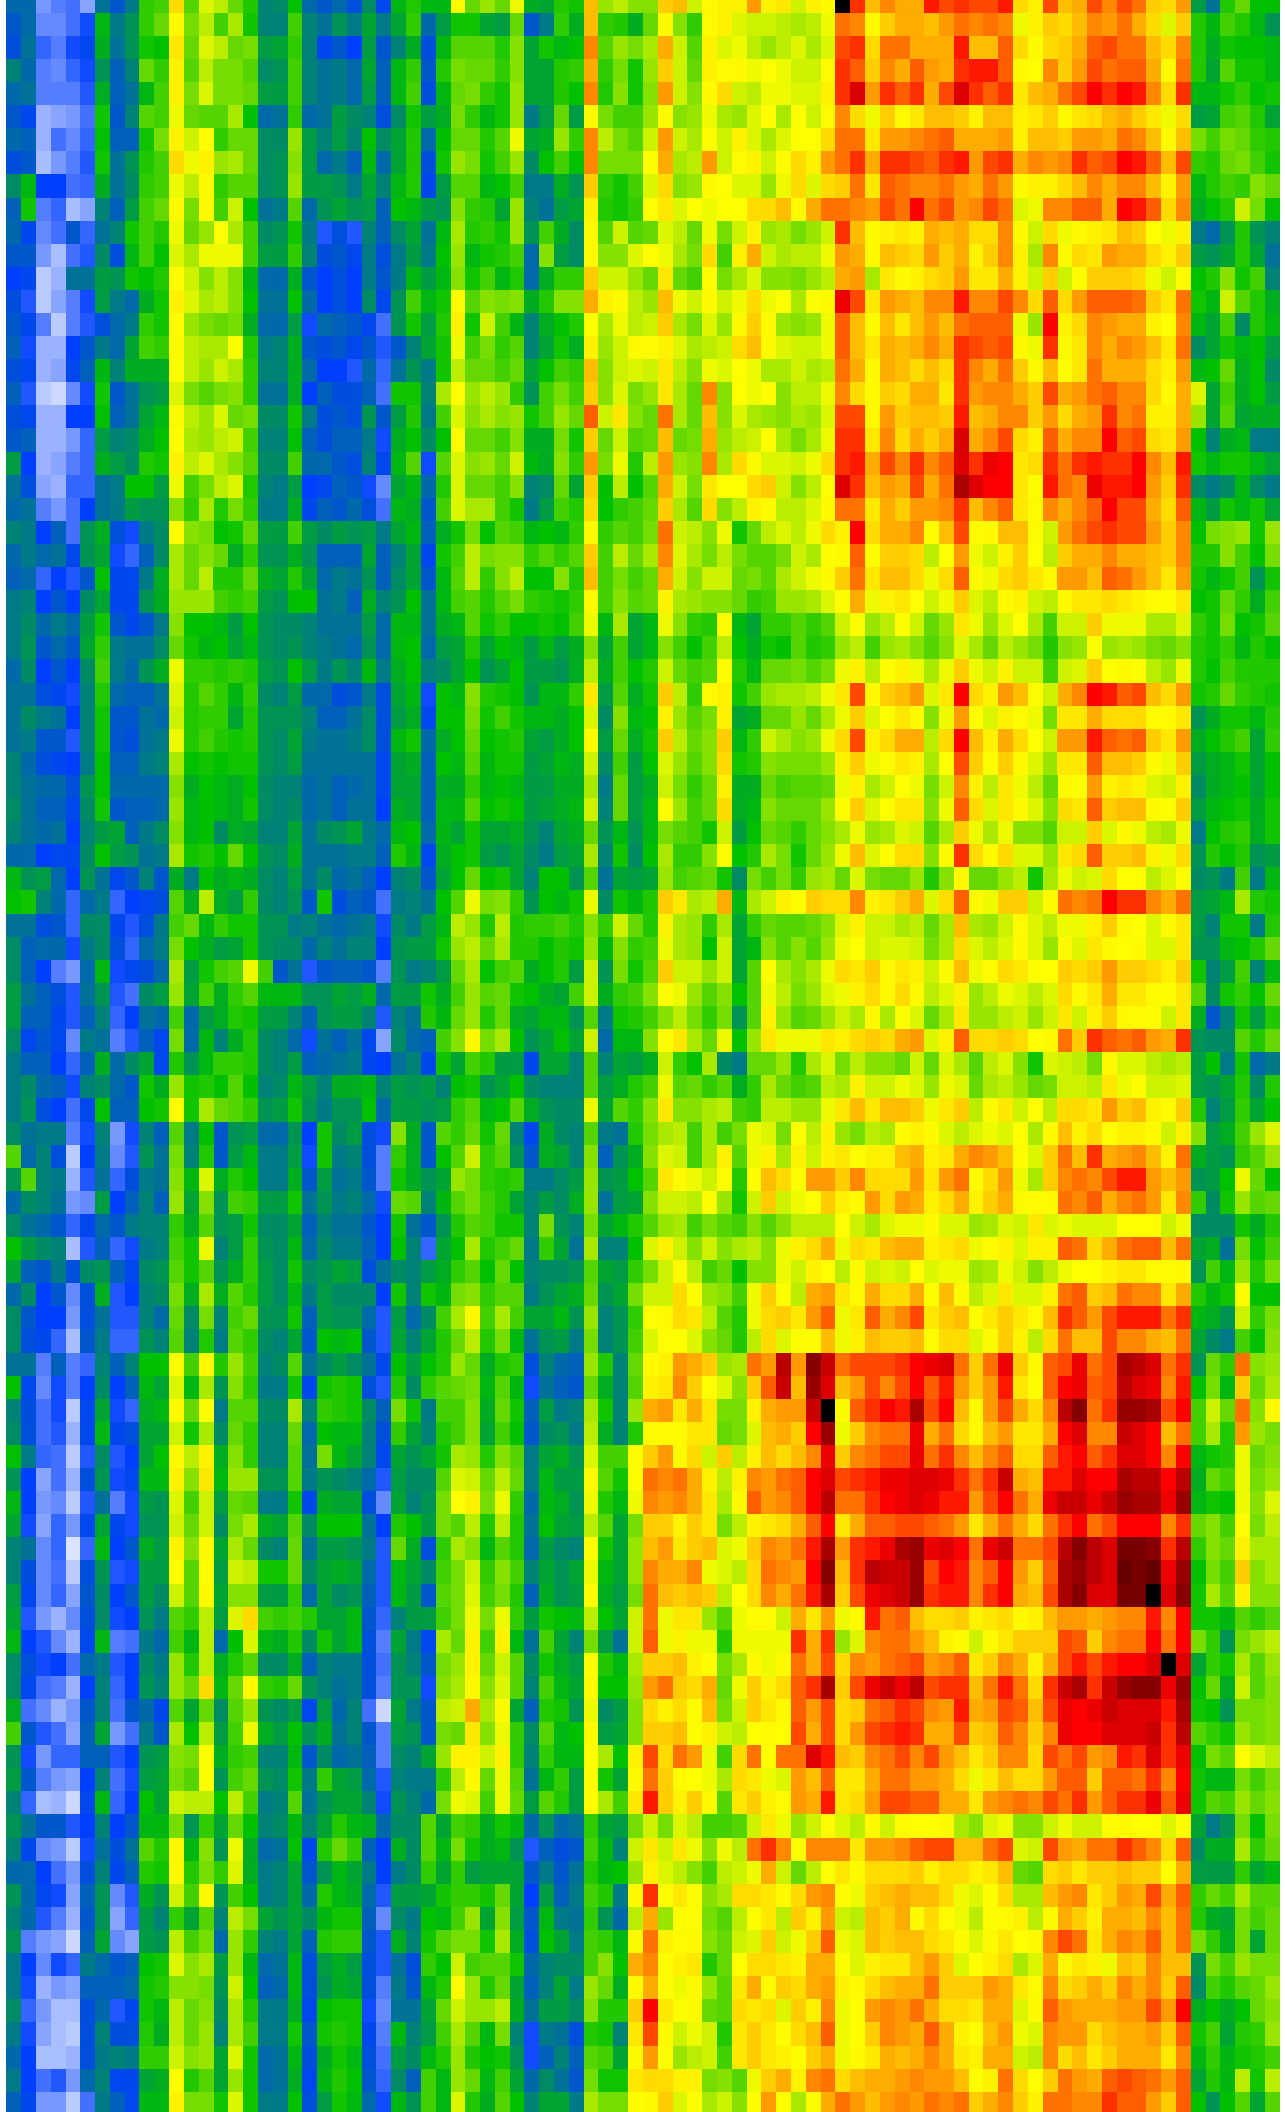

At3g12260  
At5g52860  
At5g55760  
At5g49120  
At5g11320  
At1g72480  
At2g45870  
At2g40040  
At4g19020  
At4g35730  
At3g10070  
At1g27680  
At3g58690  
At1g61010  
At2g11910  
At3g52910  
At1g06960  
At5g67140  
At4g18820  
At1g75240  
At5g51910  
At5g65410  
At5g11160  
At4g31615  
At1g65810  
At3g24340  
At1g22275  
At3g30530  
At1g47485  
At3g12890  
At1g22490  
At3g17290  
At3g59270  
At5g38320  
At2g14580  
At5g59330  
At5g64110  
At4g22490  
At2g17490  
At4g30090  
At2g37000  
At1g01760  
At1g20530  
At5g57600  
At3g50170  
At1g13680  
At5g51610  
At4g26170  
At1g71070  
At5g14230  
At5g48450  
At5g38880  
At3g14890  
At5g55180  
At5g43530  
At5g05180  
At4g14490  
At4g13690  
At1g69770  
At1g51060  
At3g11520  
At5g55830  
At5g56580  
At5g49010  
At5g13510  
At1g48270  
At2g29550  
At1g50490  
At1g20930  
At3g56640  
At3g54250  
At4g37490  
At3g27330  
At5g06050  
At5g45560  
At1g66530  
At1g50110  
At5g08580  
At2g46980  
At1g54690  
At1g18630  
At1g34350  
At5g05010  
At5g49540  
At2g07340  
At1g69620  
At2g18390  
At4g25890  
At2g43460  
At4g16265  
At2g24590



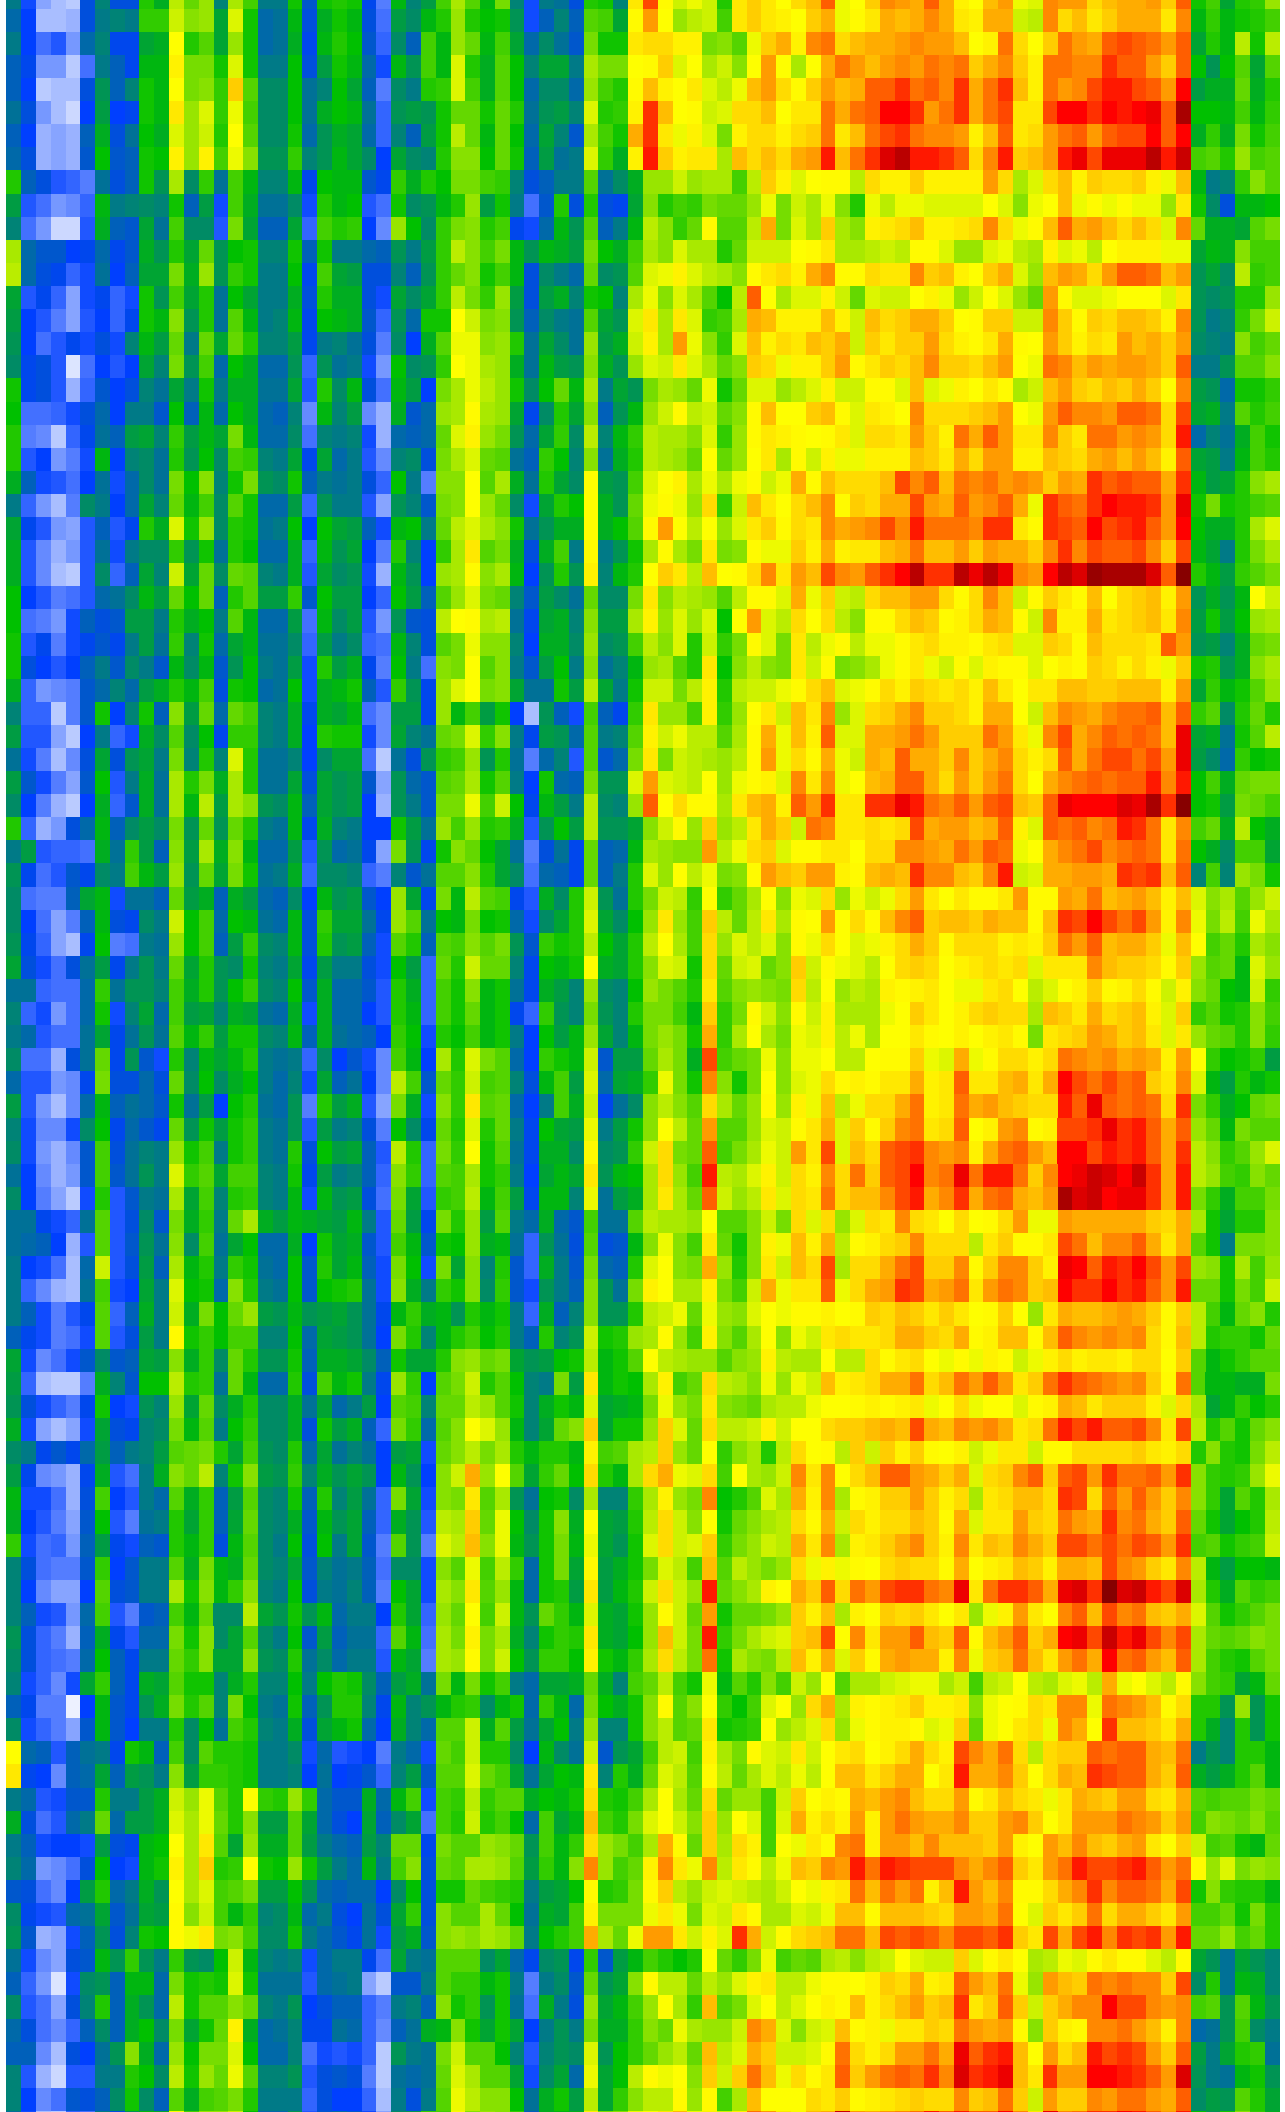

At2g43460  
At4g16265  
At2g24590  
At2g47580  
At3g13674  
At2g19720  
At1g17560  
At2g42960  
At3g16950  
At3g19820  
At5g65350  
At3g53650  
At5g15980  
At5g27330  
At5g52950  
At5g02830  
At5g51380  
At3g46030  
At5g02010  
At1g69040  
At1g55690  
At3g11500  
At1g16220  
At1g47900  
At3g20260  
At2g23380  
At5g04320  
At5g45400  
At1g23340  
At2g47630  
At3g25040  
At1g73620  
At1g24360  
At3g55920  
At4g17190  
At5g27670  
At1g09160  
At2g28740  
At3g11590  
At5g65700  
At5g22740  
At1g62870  
At5g26670  
At1g62330  
At2g36570  
At1g24764  
At2g44150  
At2g34560  
At1g72810  
At4g16340  
At5g66560  
At5g07030  
At5g42310  
At1g68060  
At5g57700  
At1g48230  
At2g38650  
At1g74800  
At1g54180  
At5g11020  
At1g59980  
At1g80350  
At2g41350  
At1g71830  
At5g15580  
At5g02550  
At1g10120  
At1g25510  
At5g26850  
At4g02290  
At1g70710  
At1g56210  
At4g16447  
At2g02100  
At1g70560  
At4g24970  
At4g19865  
At4g14920  
At4g21430  
At2g17270  
At1g79810  
At4g35905  
At1g54650  
At3g19790  
At5g58960  
At1g72170  
At1g18600  
At4g25550  
At5g16290  
At2g25100  
At3g53320

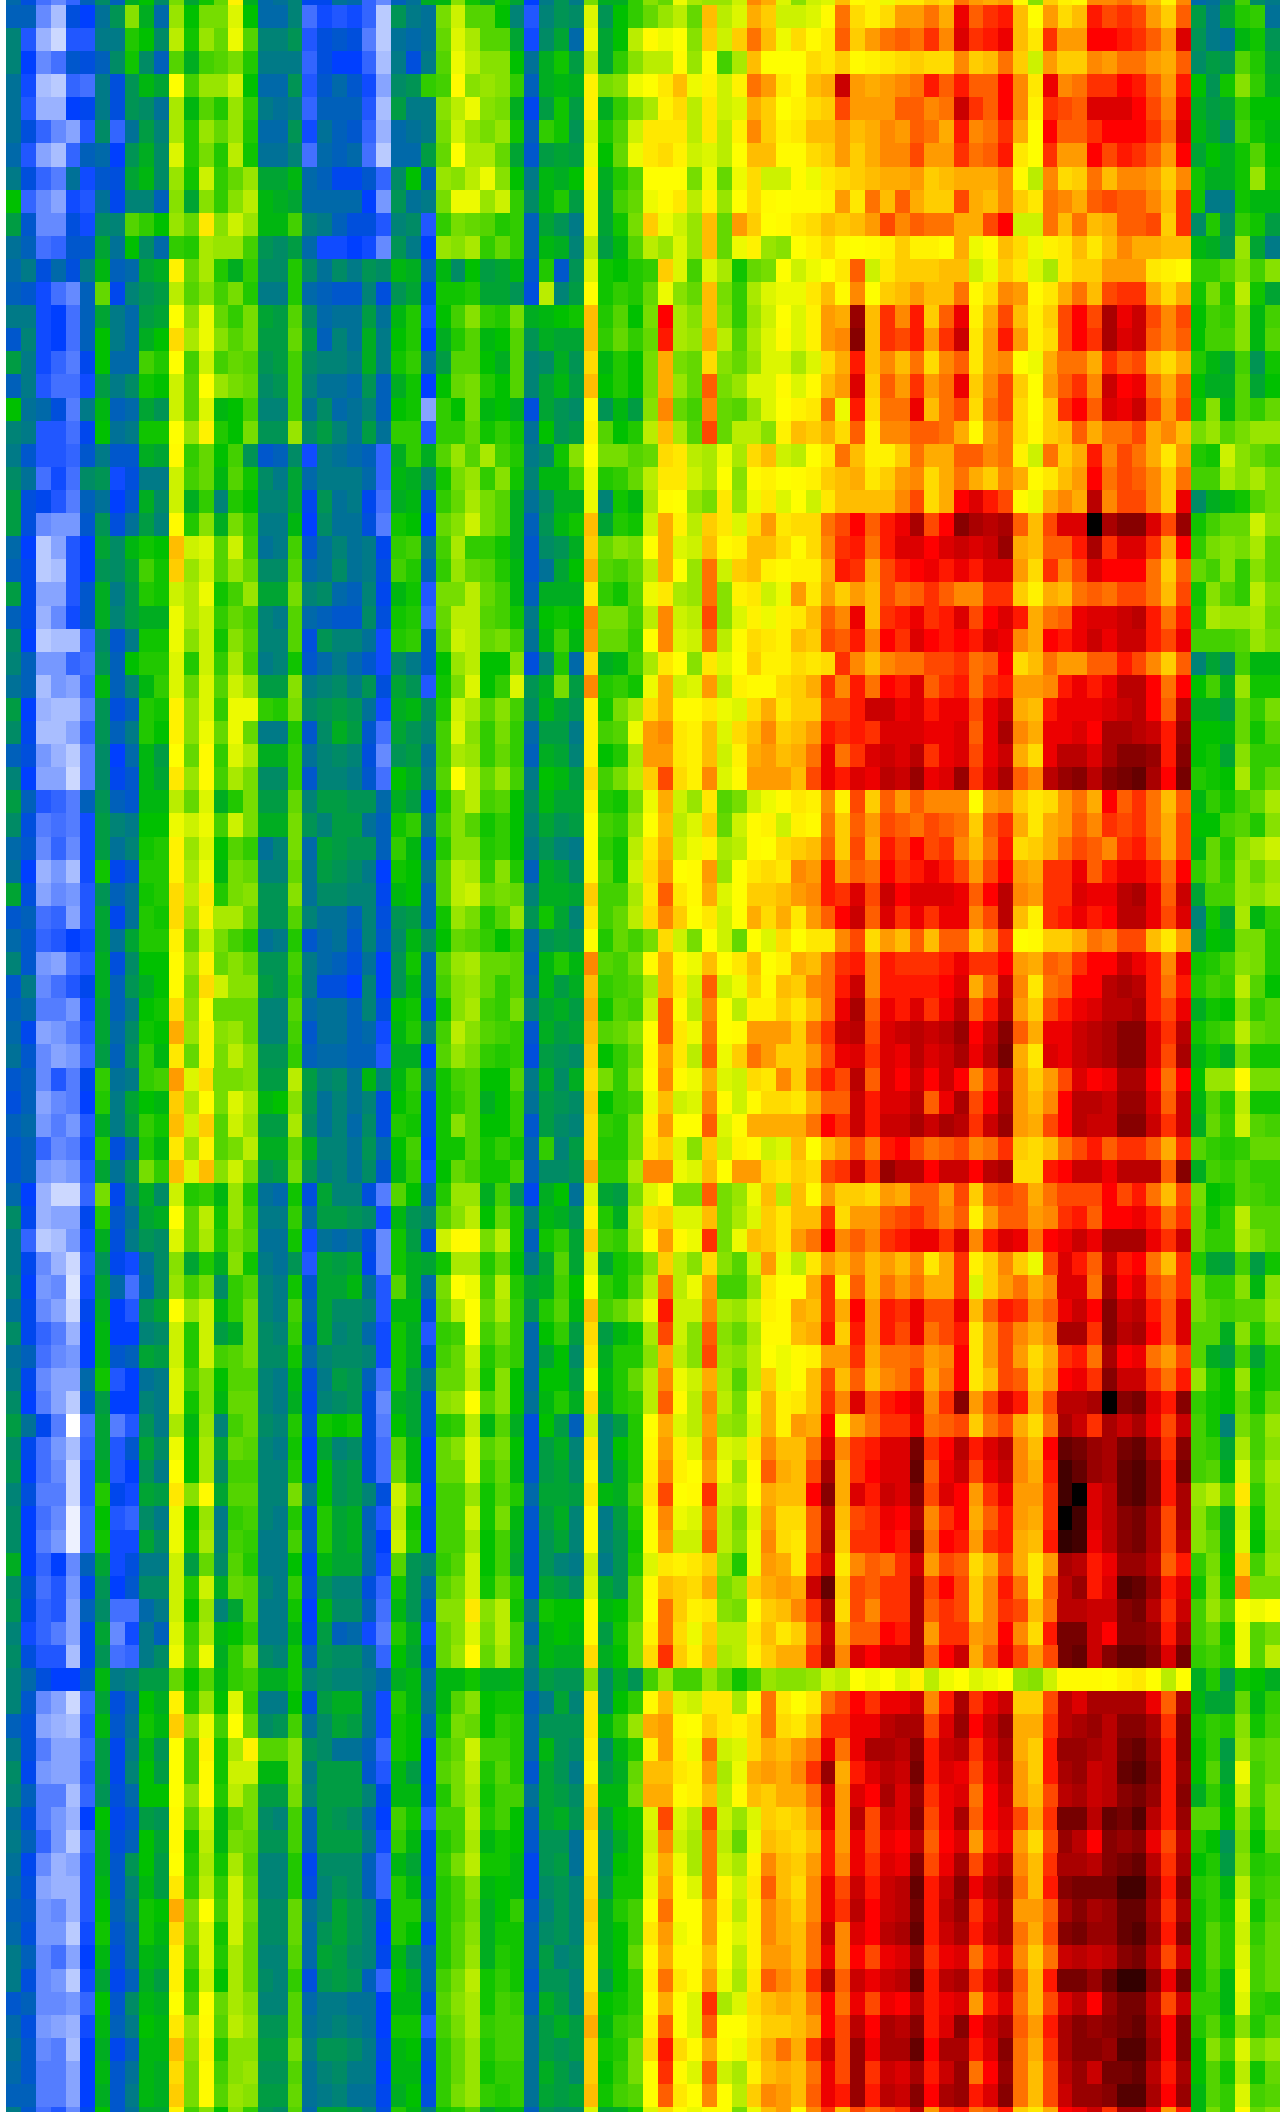

At5g16290  
At2g25100  
At3g53320  
At5g53620  
At3g20740  
At5g17070  
At4g30330  
At1g78810  
At1g32730  
At2g37470  
At2g32770  
At1g60890  
At5g58600  
At3g58770  
At1g76420  
At2g44910  
At1g31310  
At4g15140  
At5g67460  
At5g22370  
At5g63540  
At1g29270  
At4g34160  
At5g57590  
At5g67200  
At3g19300  
At5g13290  
At1g30600  
At3g56870  
At3g52110  
At5g07810  
At1g07790  
At3g01410  
At4g33400  
At1g53860  
At3g20280  
At4g24710  
At3g09730  
At1g26330  
At3g02920  
At5g11780  
At3g49250  
At1g26540  
At4g27510  
At3g18524  
At3g12170  
At3g47460  
At1g76740  
At5g63920  
At4g39170  
At2g26170  
At1g74690  
At3g53760  
At3g22780  
At4g38680  
At1g14900  
At1g21090  
At1g75640  
At2g06200  
At1g53070  
At3g50070  
At3g07320  
At2g33560  
At4g05190  
At1g76540  
At2g26760  
At3g25980  
At4g28230  
At5g48310  
At3g51720  
At5g62550  
At1g53140  
At5g66230  
At3g61610  
At1g10780  
At5g60930  
At2g28620  
At3g10310  
At2g34190  
At3g56100  
At3g15560  
At1g02730  
At4g14330  
At4g01730  
At4g17000  
At3g51280  
At4g22860  
At1g05440  
At4g39630  
At1g01370  
At1g09450

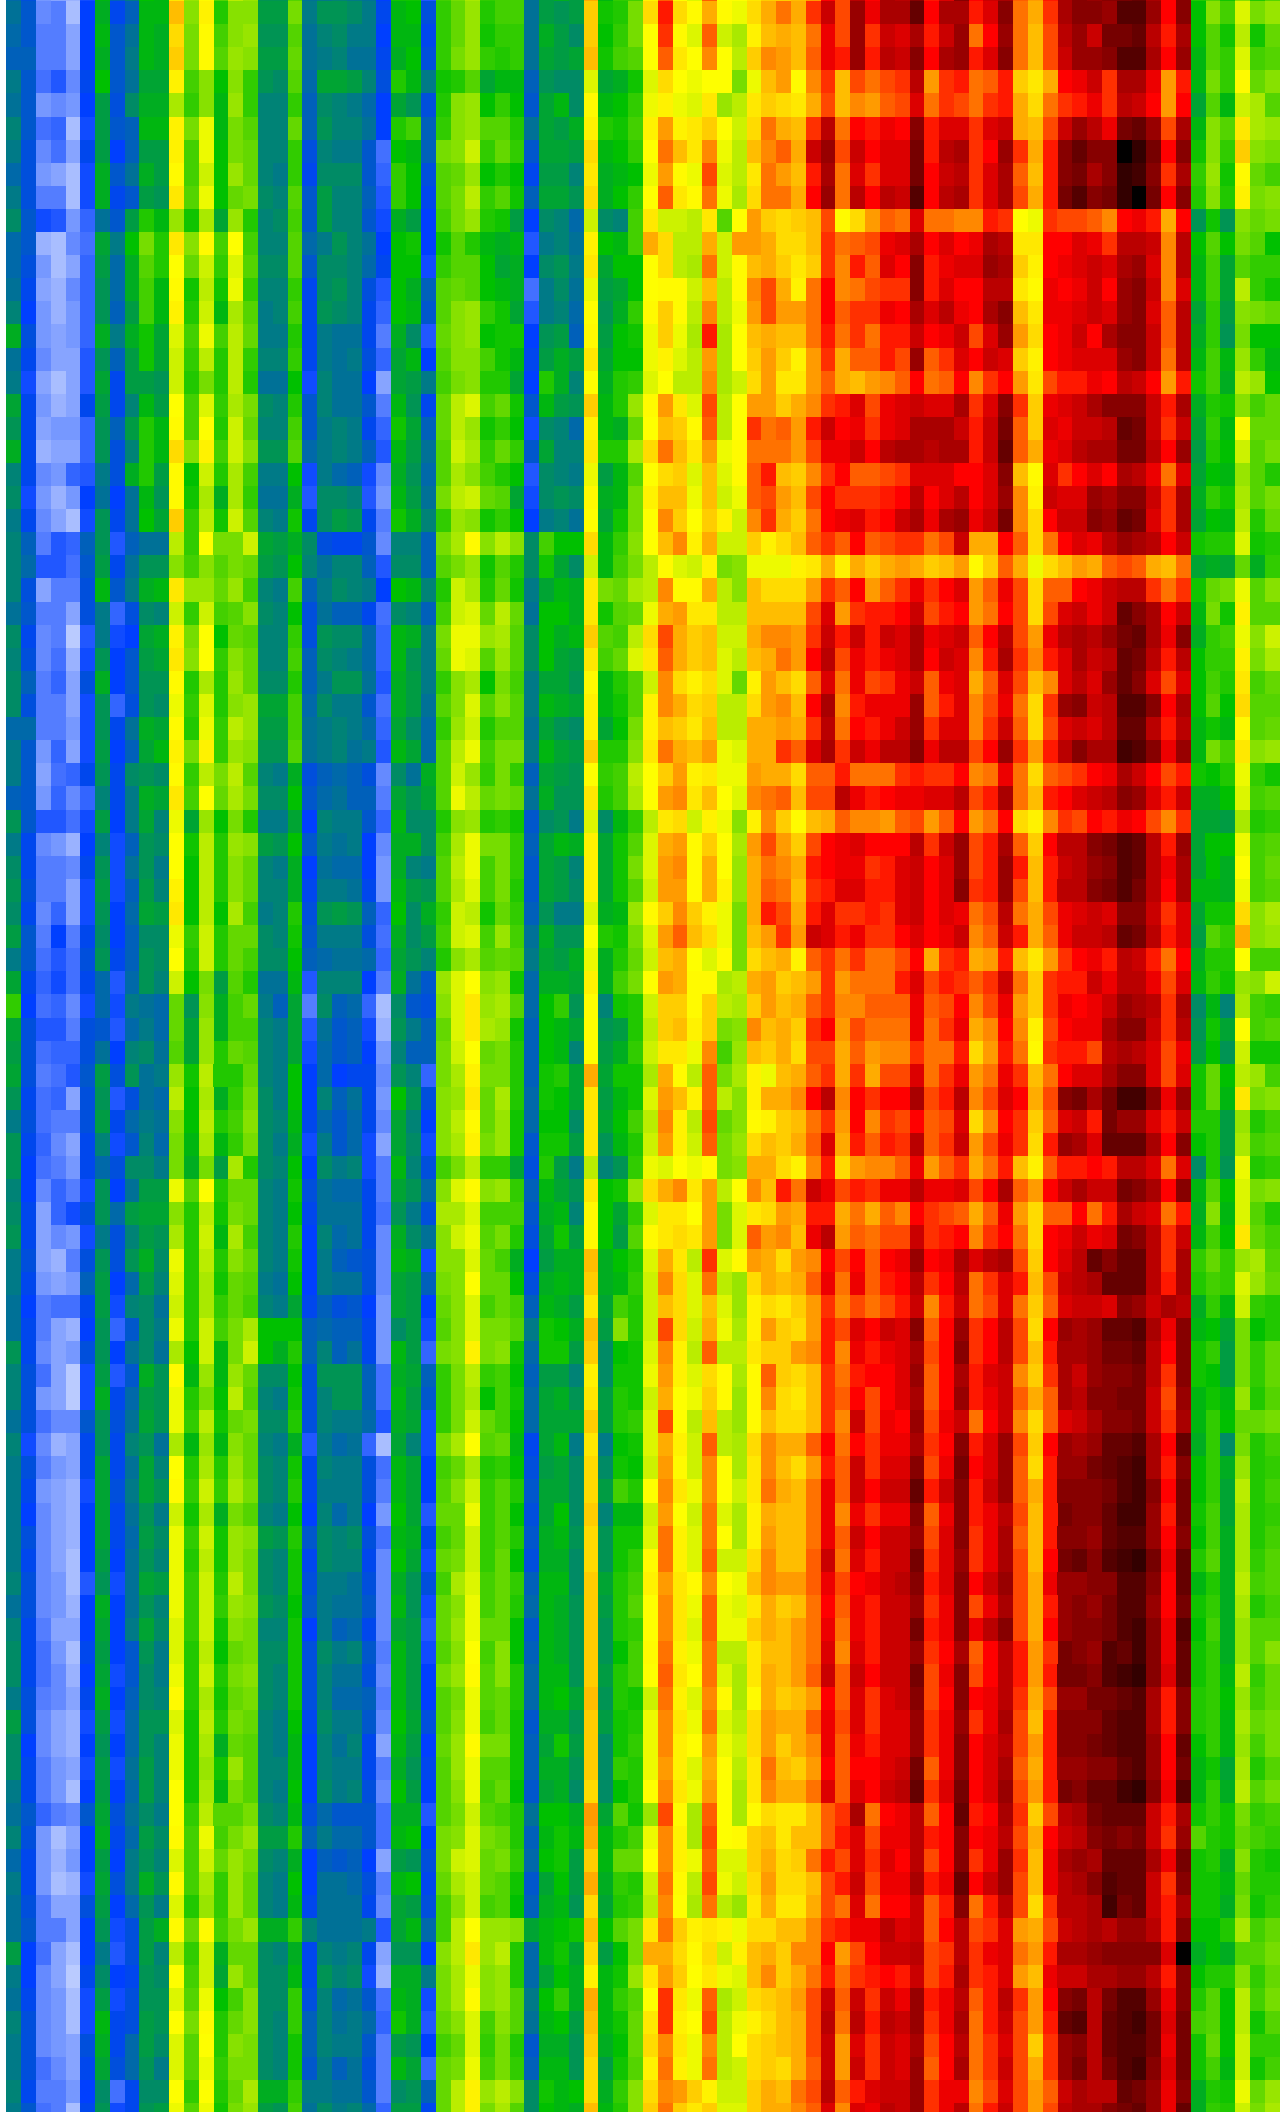

At4g39630  
At1g01370  
At1g09450  
At4g28430  
At5g05940  
At3g57860  
At1g44110  
At3g02640  
At1g76310  
At4g11080  
At2g25060  
At3g55660  
At4g02800  
At3g25100  
At3g20670  
At1g61450  
At4g20430  
At1g67320  
At4g02060  
At3g24495  
At5g23420  
At2g29570  
At1g07370  
At5g07660  
At1g71760  
At2g01630  
At1g49870  
At1g78770  
At5g48600  
At2g38160  
At5g15510  
At2g22610  
At2g32590  
At3g48425  
At1g78650  
At3g05740  
At5g66750  
At5g46280  
At2g16440  
At5g67100  
At2g07690  
At3g10880  
At5g38690  
At3g27360  
At1g57820  
At5g22880  
At5g01370  
At5g13840  
At4g31360  
At3g23890  
At4g05520  
At1g15660  
At3g53730  
At5g44560  
At3g53190  
At2g25280  
At5g23910  
At5g45700  
At2g29890  
At5g03870  
At3g58650  
At1g16070  
At3g54560  
At5g25090  
At5g55520  
At1g08560  
At5g51600  
At4g15830  
At3g06030  
At4g21270  
At4g23800  
At1g72250  
At1g03780  
At1g63100  
At5g11510  
At2g07170  
At3g23670  
At1g18370  
At4g37750  
At4g14200  
At3g19590  
At4g29360  
At1g18250  
At4g14150  
At1g80370  
At5g38110  
At5g37010  
At3g14190  
At4g31840  
At2g16270  
At3g44050  
At5g55820

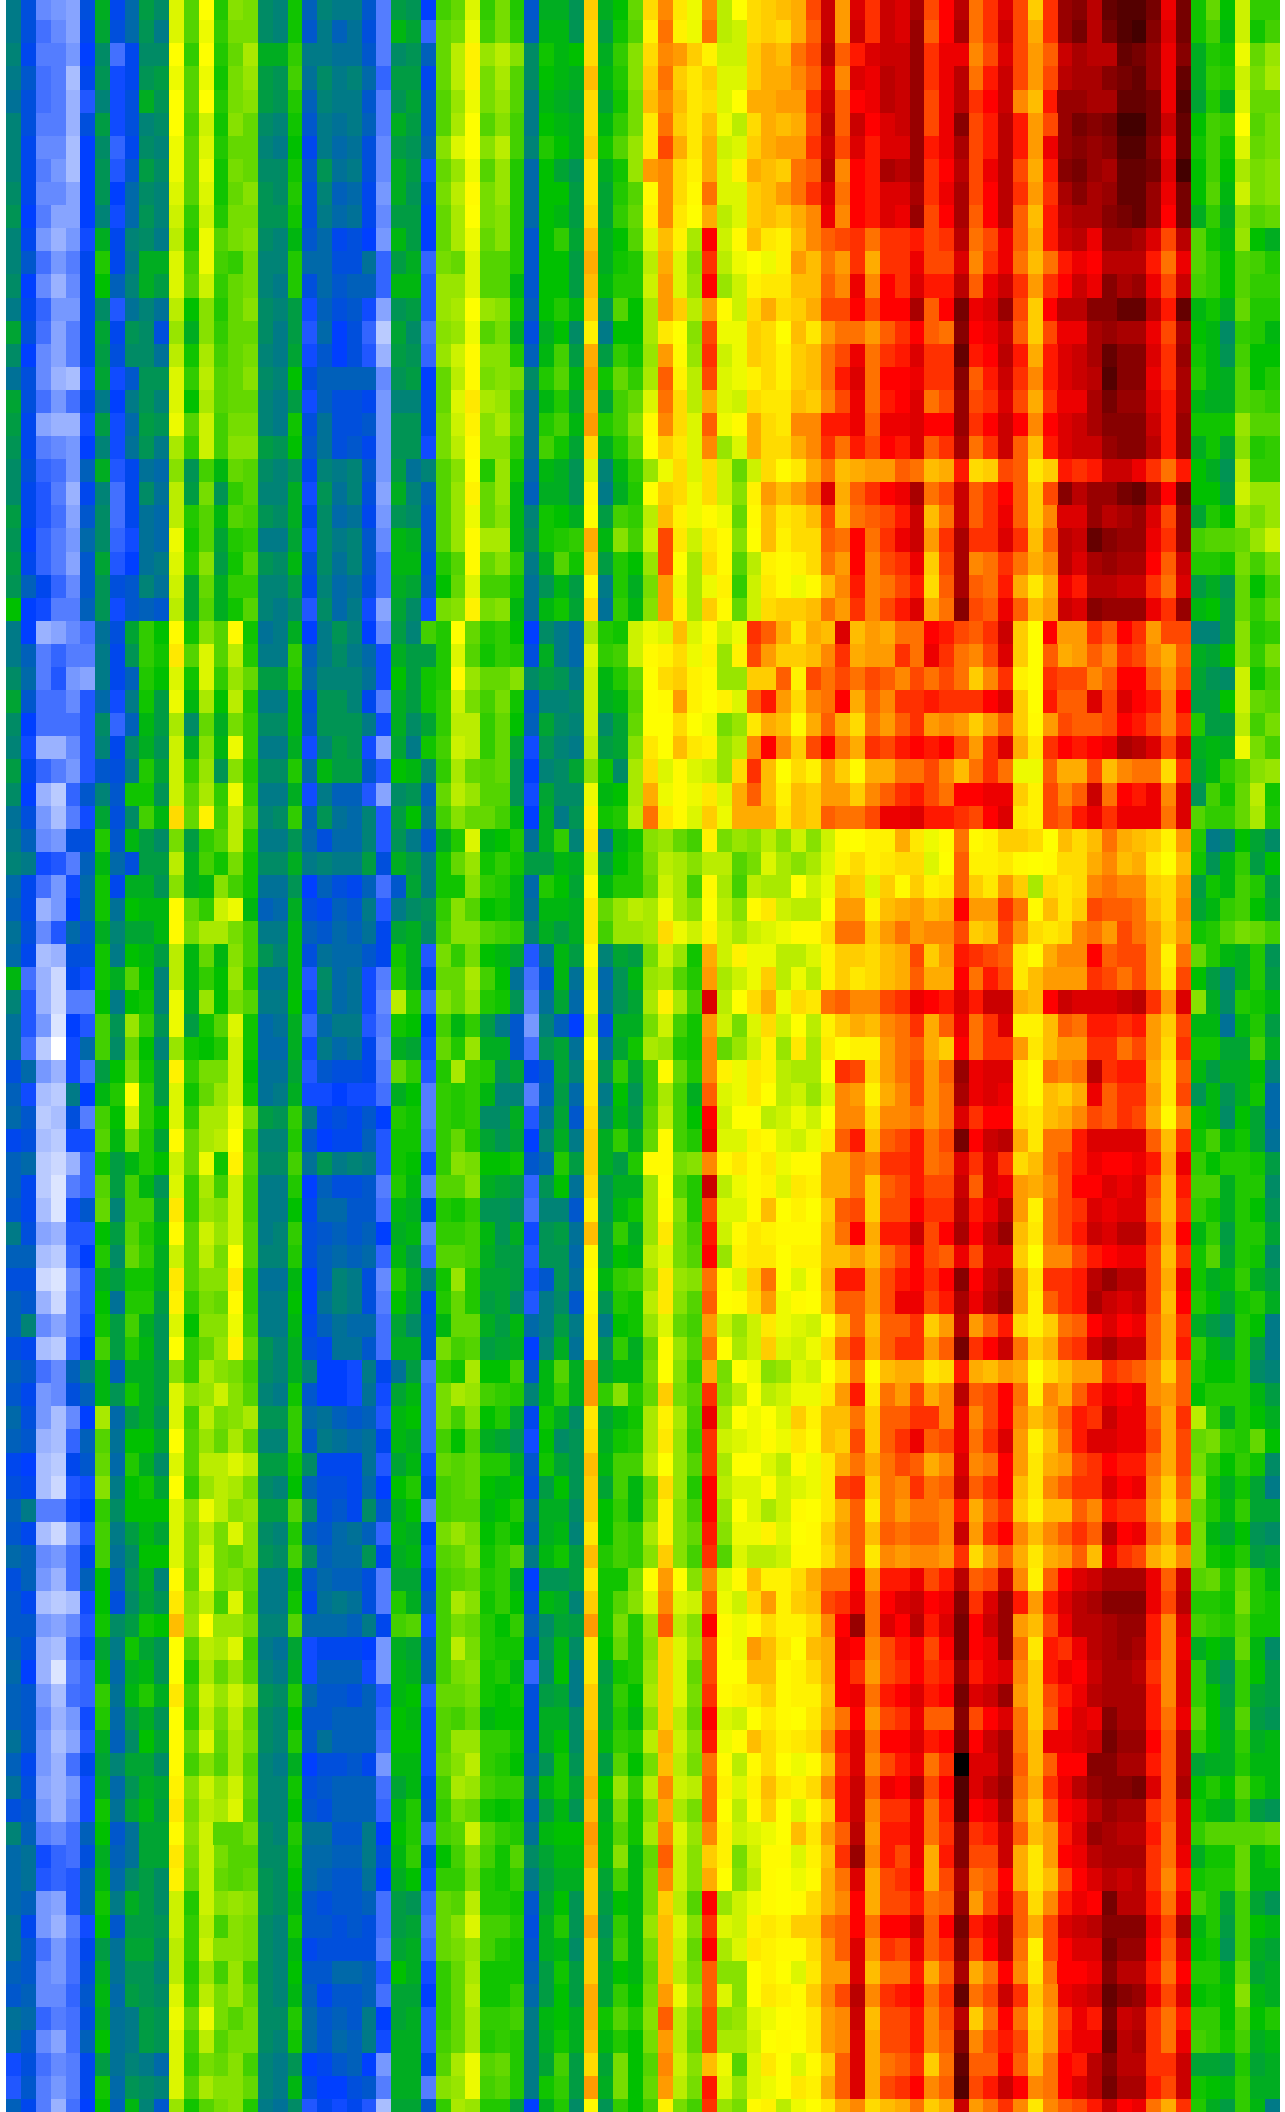

At4g31840  
At2g16270  
At3g44050  
At5g55820  
At1g34355  
At1g50240  
At1g59540  
At3g20150  
At2g36200  
At4g21820  
At5g14610  
At2g24440  
At5g60210  
At1g72670  
At1g14180  
At5g48360  
At2g28790  
At3g13190  
At5g43990  
At3g10180  
At1g05950  
At3g51740  
At3g17360  
At5g62710  
At2g01210  
At3g02000  
At3g63300  
At2g21790  
At5g46740  
At4g15890  
At5g16690  
At3g57060  
At5g49160  
At4g13120  
At2g37790  
At1g34065  
At3g14980  
At1g31040  
At5g49555  
At5g60940  
At5g27240  
At2g37300  
At5g49100  
At3g56370  
At5g46570  
At5g13980  
At1g11820  
At2g45340  
At1g27120  
At1g18650  
At4g39900  
At2g05790  
At3g13560  
At1g21810  
At4g03210  
At5g61130  
At3g15680  
At2g02170  
At1g67820  
At3g10010  
At5g10320  
At2g19170  
At1g65900  
At1g16780  
At5g11550  
At1g77270  
At5g51750  
At1g19830  
At4g15790  
At1g21880  
At3g57830  
At1g77630  
At3g17840  
At3g05470  
At5g08000  
At5g43020  
At5g67260  
At3g17680  
At1g14440  
At1g11730  
At5g66940  
At1g10980  
At2g32765  
At3g51290  
At4g29030  
At1g67040  
At3g61310  
At3g61250  
At1g44760  
At2g45190  
At2g26330  
At3g14240

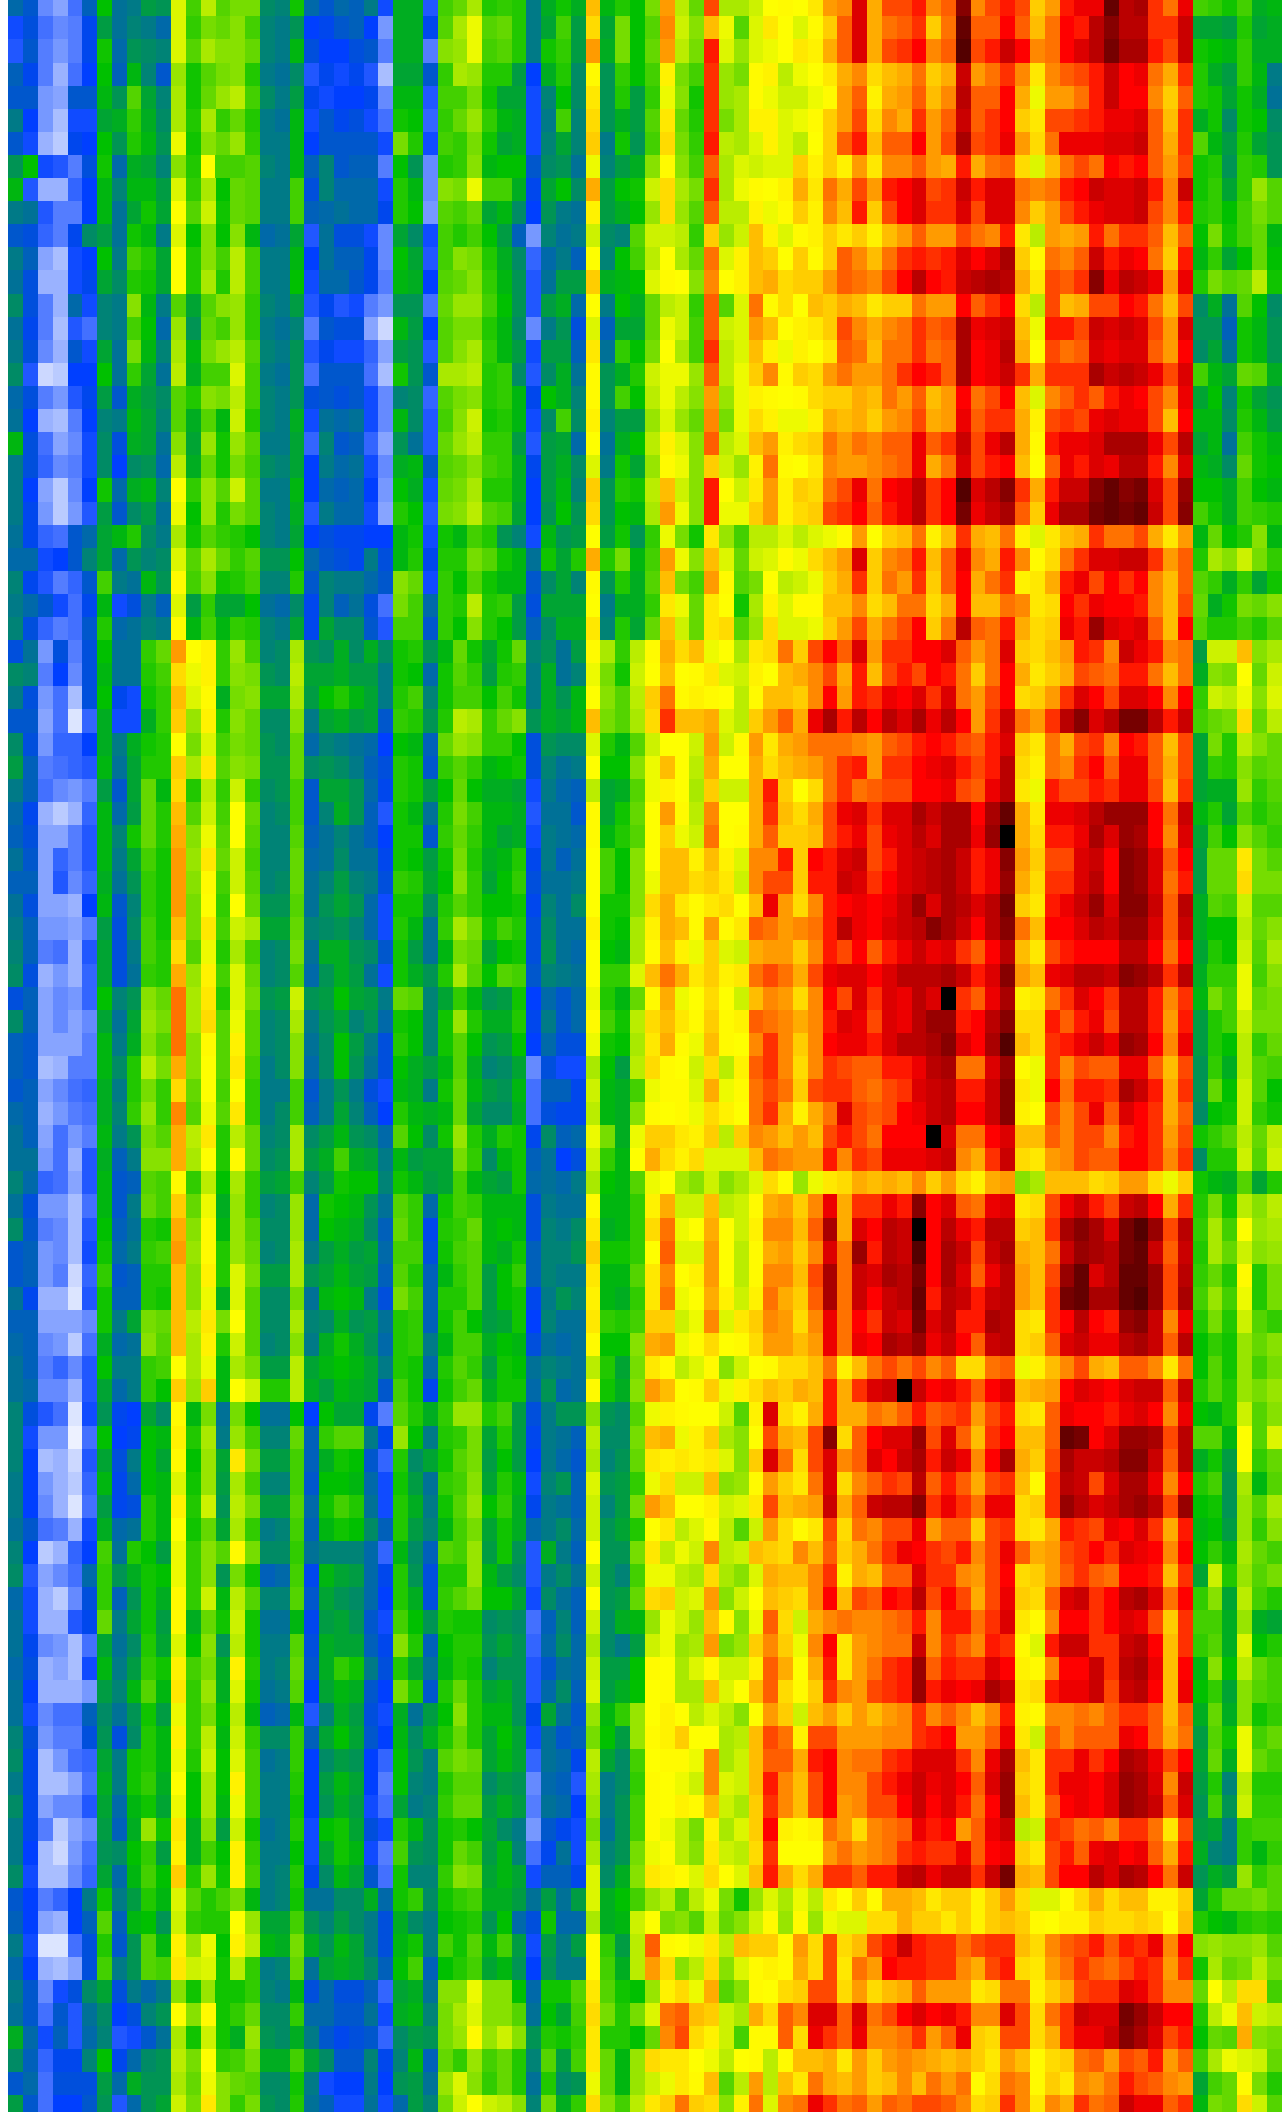

At1g44760  
At2g45190  
At2g26330  
At3g14240  
At4g27240  
At1g68400  
At2g37630  
At2g19620  
At4g24790  
At4g09510  
At2g04845  
At3g06740  
At1g69700  
At5g50740  
At1g48610  
At5g50730  
At1g69420  
At2g47920  
At3g53380  
At5g10400  
At3g15550  
At5g51560  
At4g38660  
At1g15080  
At1g77110  
At3g25905  
At5g08390  
At1g05470  
At5g06590  
At1g20720  
At1g49910  
At5g62410  
At4g16970  
At3g23740  
At1g65470  
At4g28310  
At5g43080  
At2g40550  
At1g67630  
At3g02820  
At2g31270  
At1g75150  
At2g24490  
At1g02970  
At1g04730  
At5g08020  
At5g61000  
At5g10390  
At5g41880  
At2g36010  
At3g27640  
At3g48540  
At4g26660  
At4g35620  
At5g01910  
At5g67270  
At3g12870  
At1g23790  
At5g60150  
At4g12540  
At1g18040  
At3g54650  
At5g17160  
At3g54750  
At2g42110  
At3g03130  
At1g26760  
At3g43610  
At3g45980  
At3g58100  
At4g27230  
At5g16250  
At3g02120  
At4g03100  
At1g08880  
At5g52220  
At5g65360  
At5g59870  
At1g09200  
At3g14740  
At1g04520  
At1g04020  
At3g49500  
At5g04510  
At1g55130  
At5g07590  
At3g07540  
At5g13960  
At1g19850  
At1g59560  
At3g18210  
At1g44780

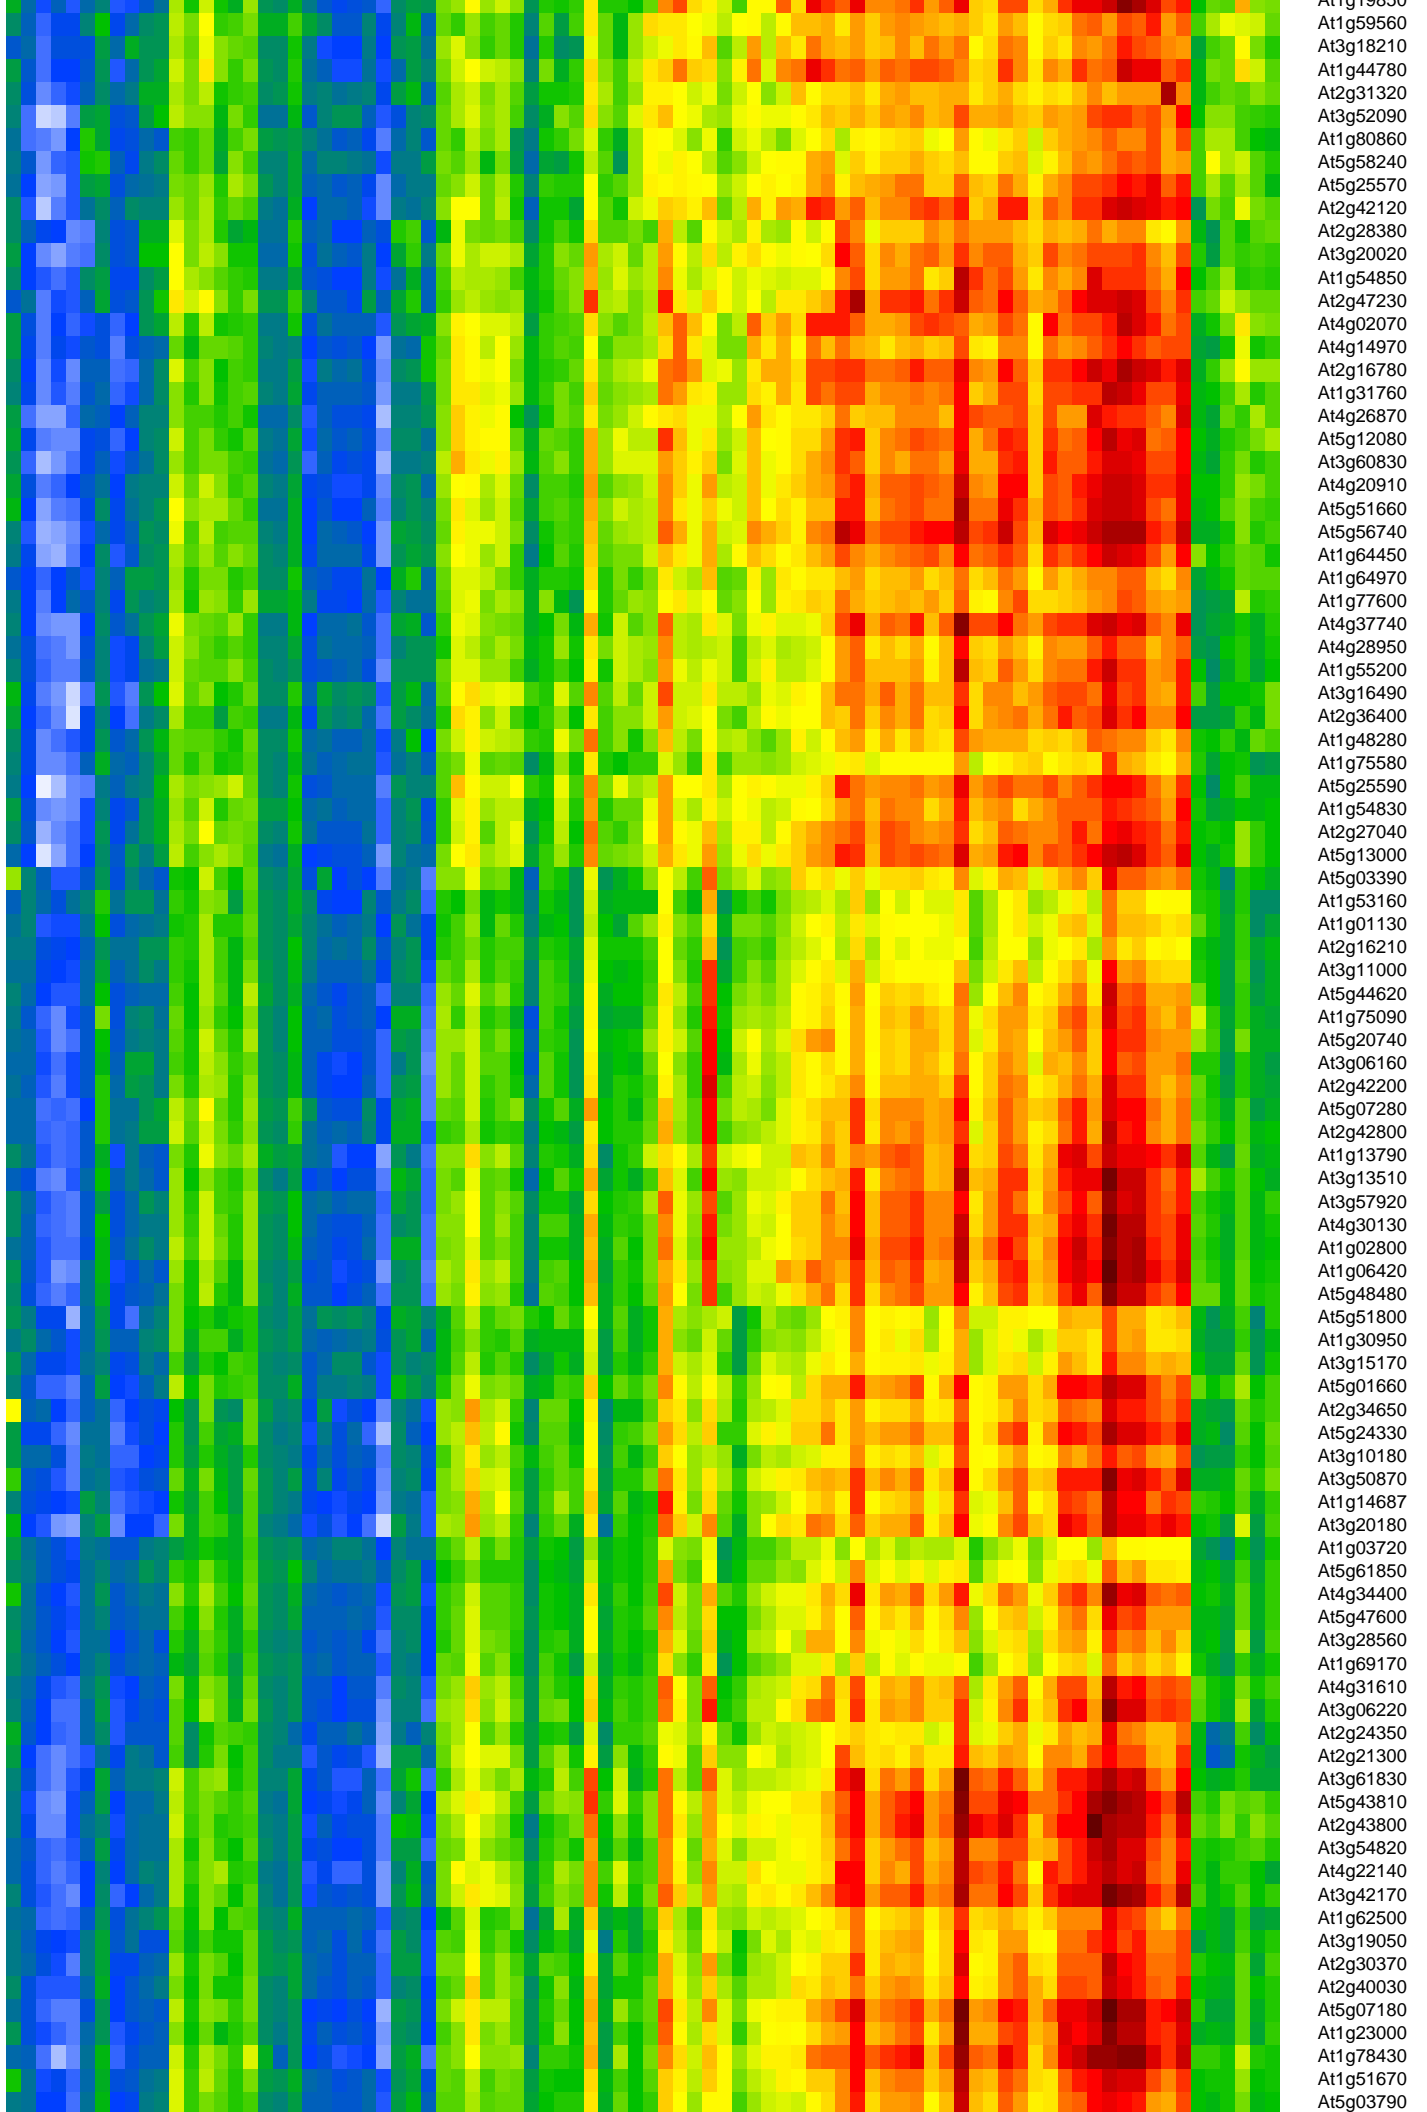

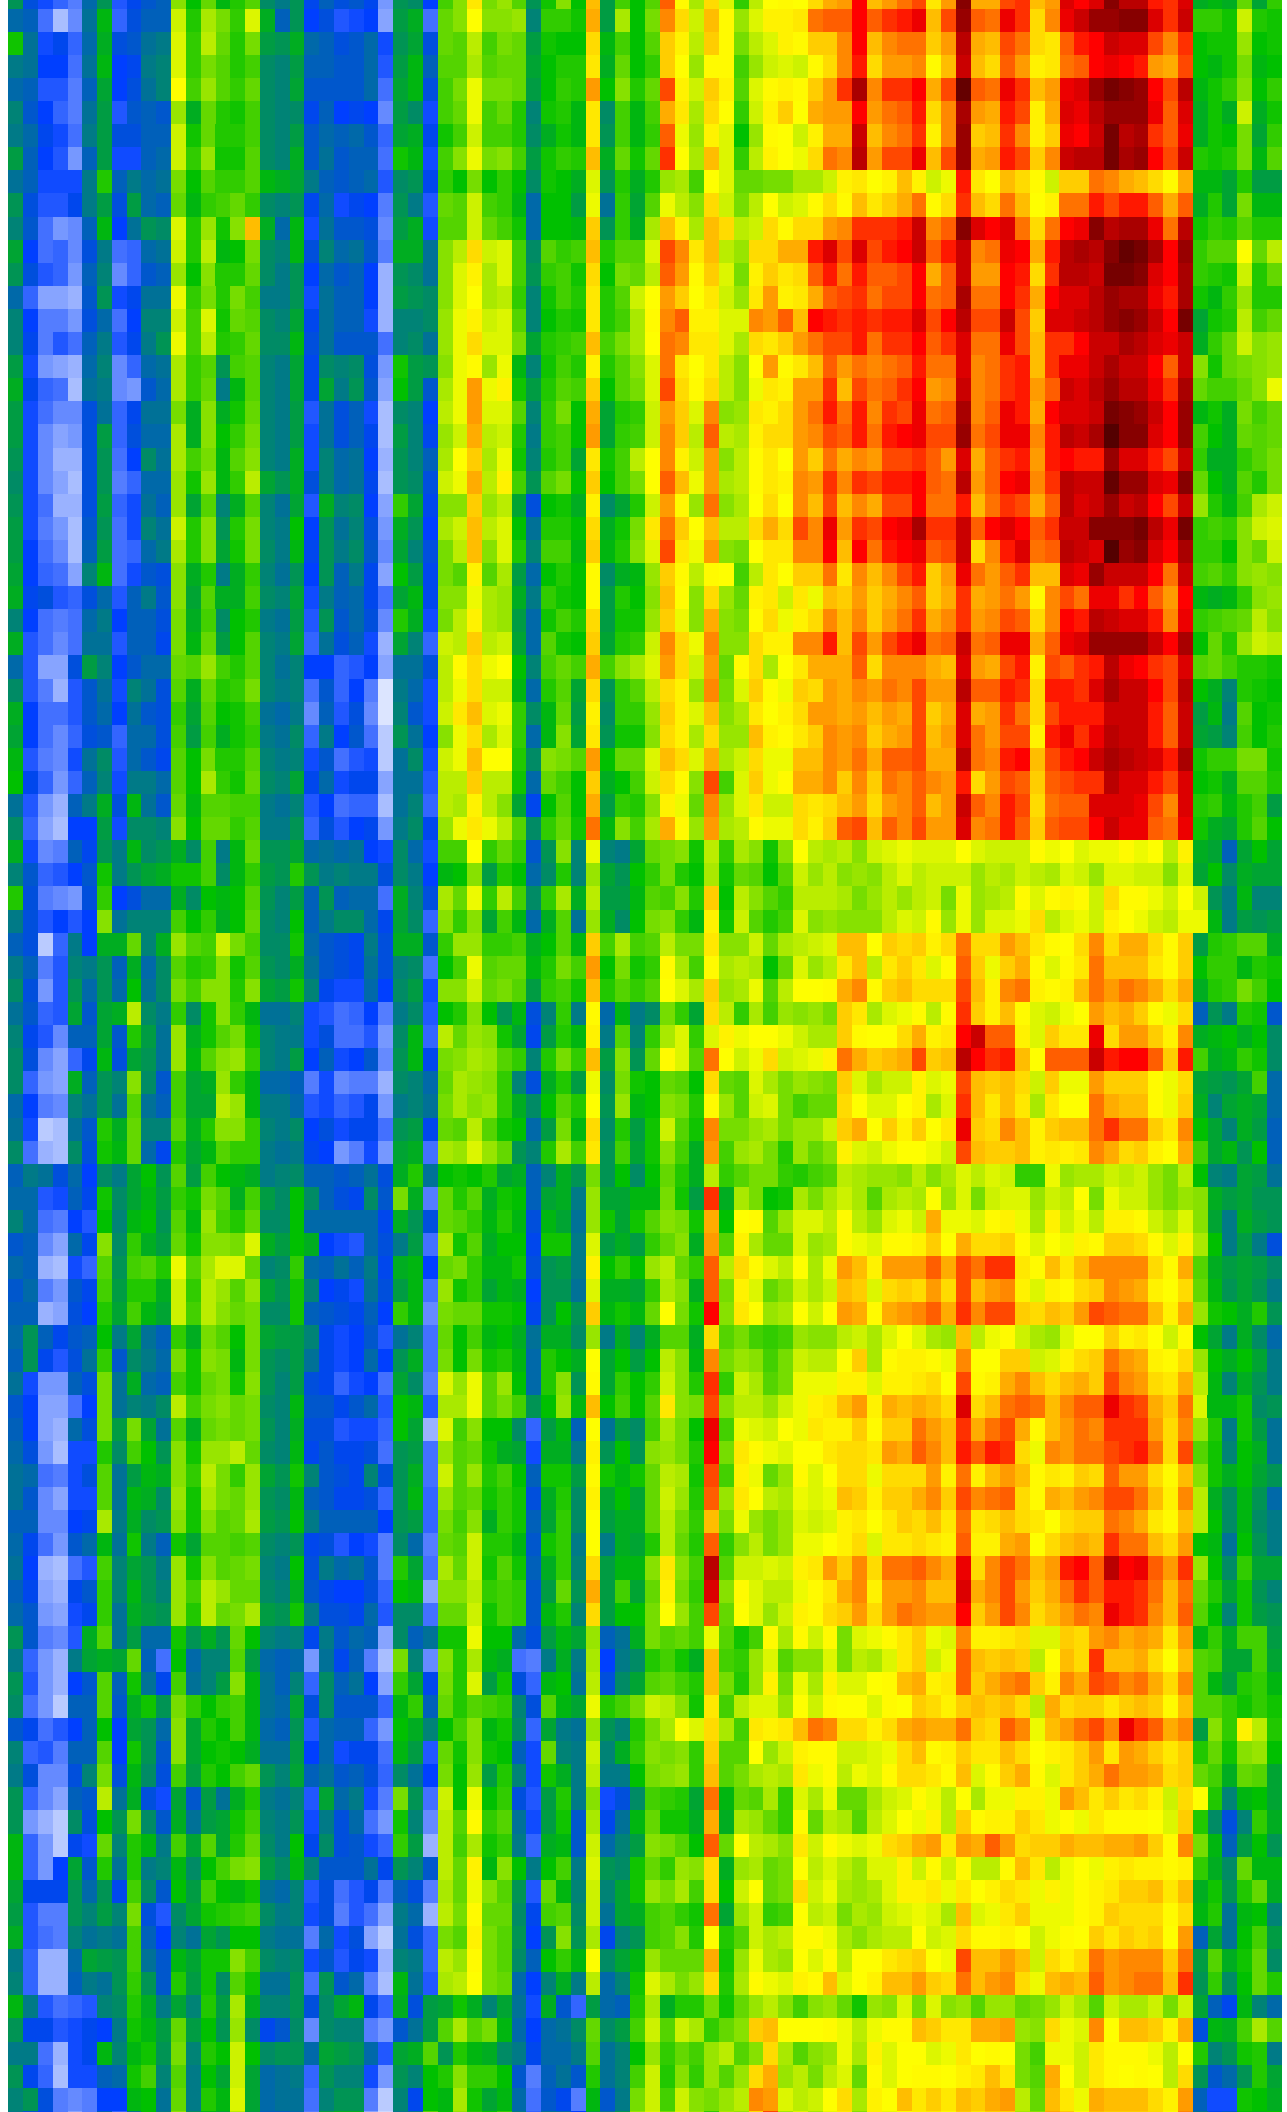

At1g78430  
At1g51670  
At5g03790  
At3g02210  
At1g09460  
At1g13710  
At1g68640  
At1g28710  
At3g44960  
At3g13175  
At5g63950  
At3g54630  
At5g27740  
At2g38810  
At5g02520  
At1g16520  
At1g32930  
At3g17160  
At1g63470  
At4g26760  
At4g39860  
At5g01890  
At3g22780  
At4g36180  
At1g28110  
At1g11130  
At2g21050  
At1g11130  
At4g26840  
At2g37080  
At5g59910  
At1g66250  
At5g40870  
At1g63480  
At1g21560  
At2g13690  
At4g12700  
At3g60900  
At4g10960  
At1g49430  
At5g65460  
At1g78580  
At5g01770  
At5g63700  
At1g11300  
At4g03205  
At3g30300  
At2g31150  
At3g13000  
At1g49890  
At4g04260  
At5g37300  
At5g62210  
At2g47240  
At3g49900  
At3g55110  
At1g10640  
At5g24420  
At1g24070  
At3g59420  
At3g26932  
At1g17140  
At5g47500  
At1g51460  
At5g23940  
At3g05600  
At4g03010  
At4g32710  
At3g50890  
At3g08770  
At3g54920  
At3g04940  
At5g18410  
At1g24120  
At2g04270  
At3g60380  
At4g35880  
At1g30440  
At1g74160  
At1g75710  
At2g15530  
At3g12550  
At5g06670  
At1g62520  
At1g20540  
At5g11690  
At3g56090  
At1g80560  
At3g10700  
At1g64580  
At4g24830

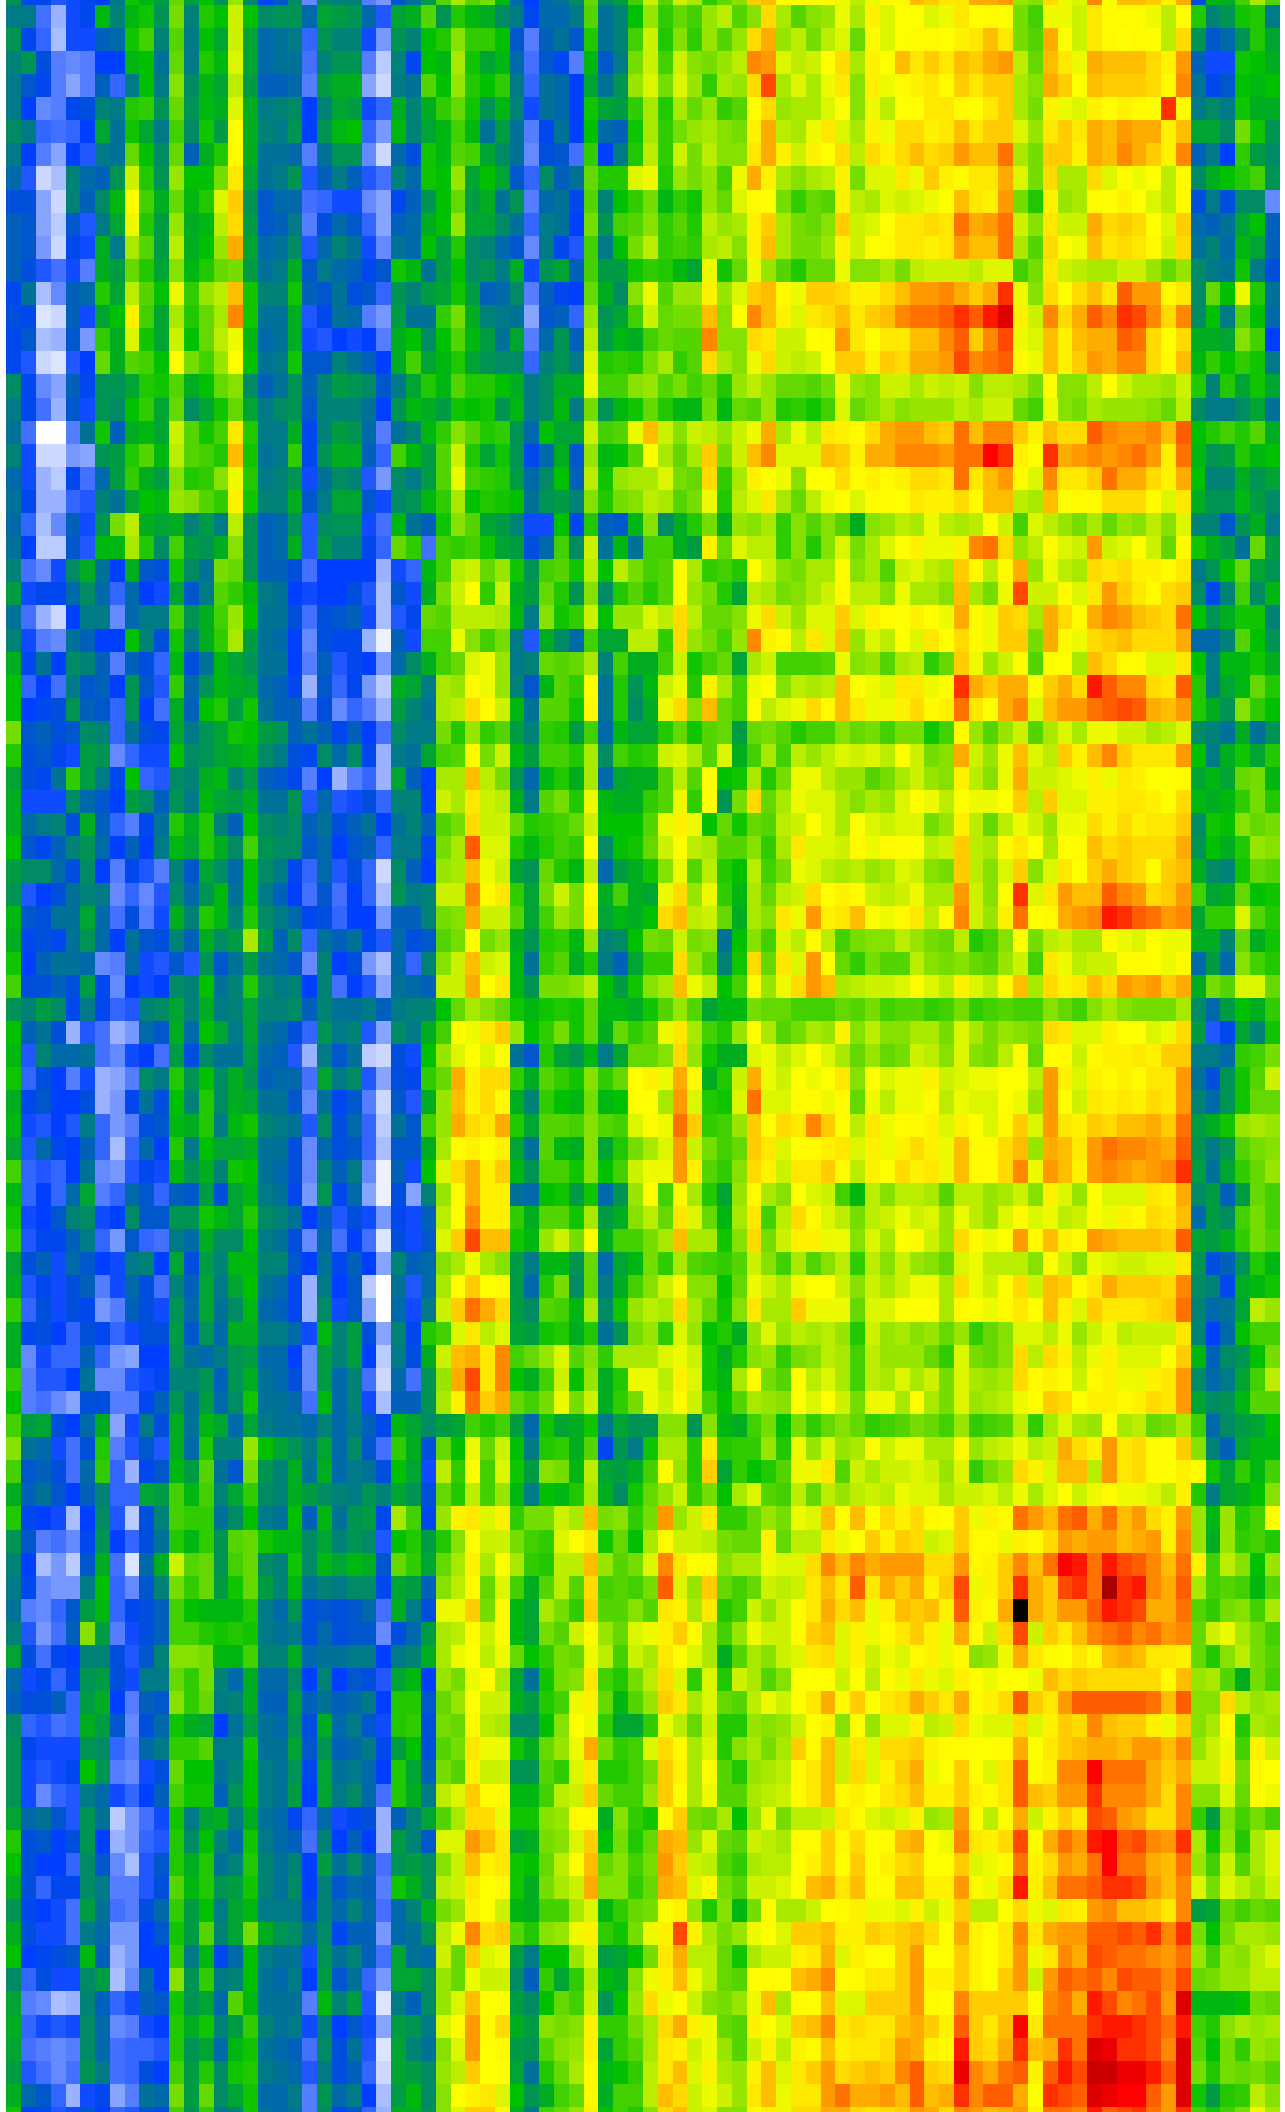

At3g10700  
At1g64580  
At4g24830  
At2g20140  
At3g27060  
At3g55350  
At3g53580  
At2g37860  
At5g64816  
At2g37500  
At2g36230  
At1g62085  
At5g09240  
At1g33040  
At2g27810  
At2g40820  
At1g09820  
At1g16690  
At1g16340  
At1g43190  
At4g24670  
At3g22880  
At5g52920  
At4g35920  
At5g36210  
At3g58560  
At2g38550  
At4g39280  
At2g01130  
At1g55350  
At3g49600  
At5g59200  
At1g11880  
At4g01210  
At2g25170  
At2g07739  
At2g07708  
At1g62860  
At1g68720  
At1g63020  
At1g62670  
At4g02450  
At5g24750  
At2g03110  
At1g02090  
At5g43010  
At3g04820  
At1g61870  
At5g15610  
At3g02710  
At4g10320  
At4g22000  
At1g31360  
At1g13220  
At1g62680  
At3g07170  
At3g02760  
At2g25640  
At2g25710  
At1g25350  
At5g10540  
At5g65620  
At5g10540  
At4g20320  
At4g16845  
At2g47900  
At5g40740  
At3g16620  
At5g48500  
At1g54610  
At4g02610  
At2g22420  
At1g19120  
At5g18590  
At1g43580  
At4g27060  
At5g51350  
At2g34710  
At1g76660  
At2g27230  
At1g32190  
At5g60690  
At5g44730  
At1g76710  
At5g23580  
At4g34960  
At1g17350  
At4g00990  
At1g01510  
At3g25150  
At5g62390



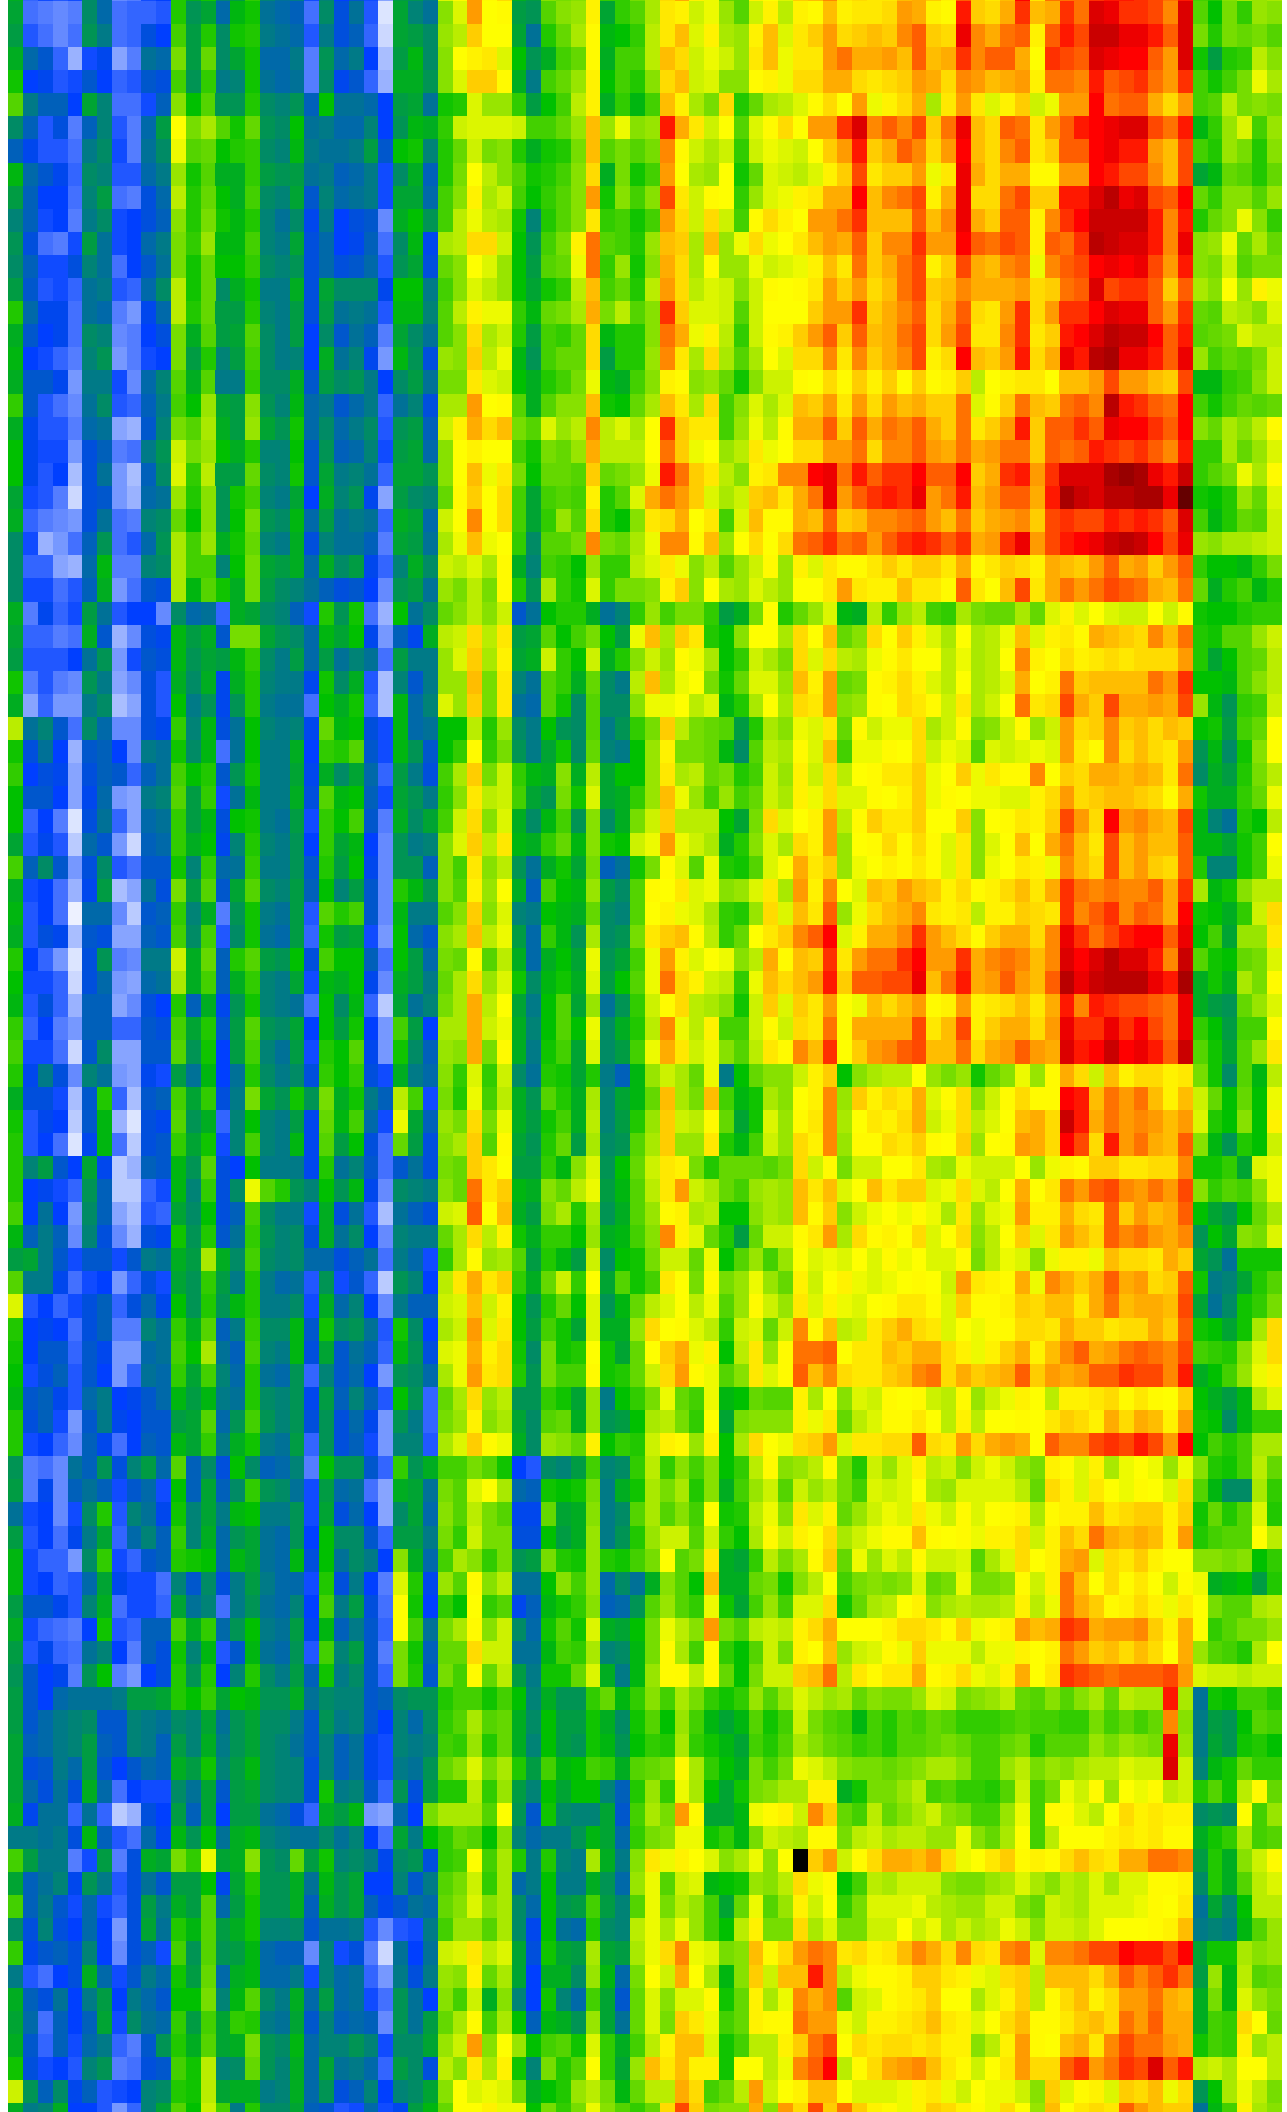

At1g01510  
At3g25150  
At5g62390  
At1g19880  
At1g05370  
At2g21800  
At1g73100  
At2g47720  
At1g04050  
At2g39870  
At5g25475  
At2g37420  
At5g57130  
At1g73590  
At3g09070  
At2g23700  
At1g75520  
At5g48650  
At1g60860  
At1g06590  
At5g51590  
At1g02690  
At3g18520  
At3g62300  
At4g22250  
At1g77610  
At2g40316  
At5g56360  
At5g27970  
At3g66658  
At4g29680  
At3g15650  
At1g56020  
At2g26700  
At3g50620  
At5g56220  
At2g20515  
At3g63240  
At2g19600  
At1g28290  
At2g17560  
At4g33130  
At4g25240  
At4g31890  
At3g04810  
At5g54670  
At4g29700  
At5g50010  
At5g57970  
At4g00820  
At3g25400  
At3g45090  
At1g01110  
At1g80100  
At1g02670  
At2g35530  
At2g32410  
At4g21060  
At4g32730  
At1g50660  
At3g08570  
At1g30820  
At5g57410  
At2g28310  
At4g32120  
At1g08660  
At2g38970  
At5g59010  
At2g37050  
At2g34680  
At2g20300  
At4g37650  
At3g55005  
At5g20850  
At1g08260  
At4g21070  
At1g13330  
At1g07880  
At2g27020  
At2g39960  
At1g57700  
At5g51840  
At1g26900  
At1g56340  
At4g24940  
At2g03870  
At1g71440  
At5g65440  
At2g07783  
At1g35780  
At3g45740  
At5g48750

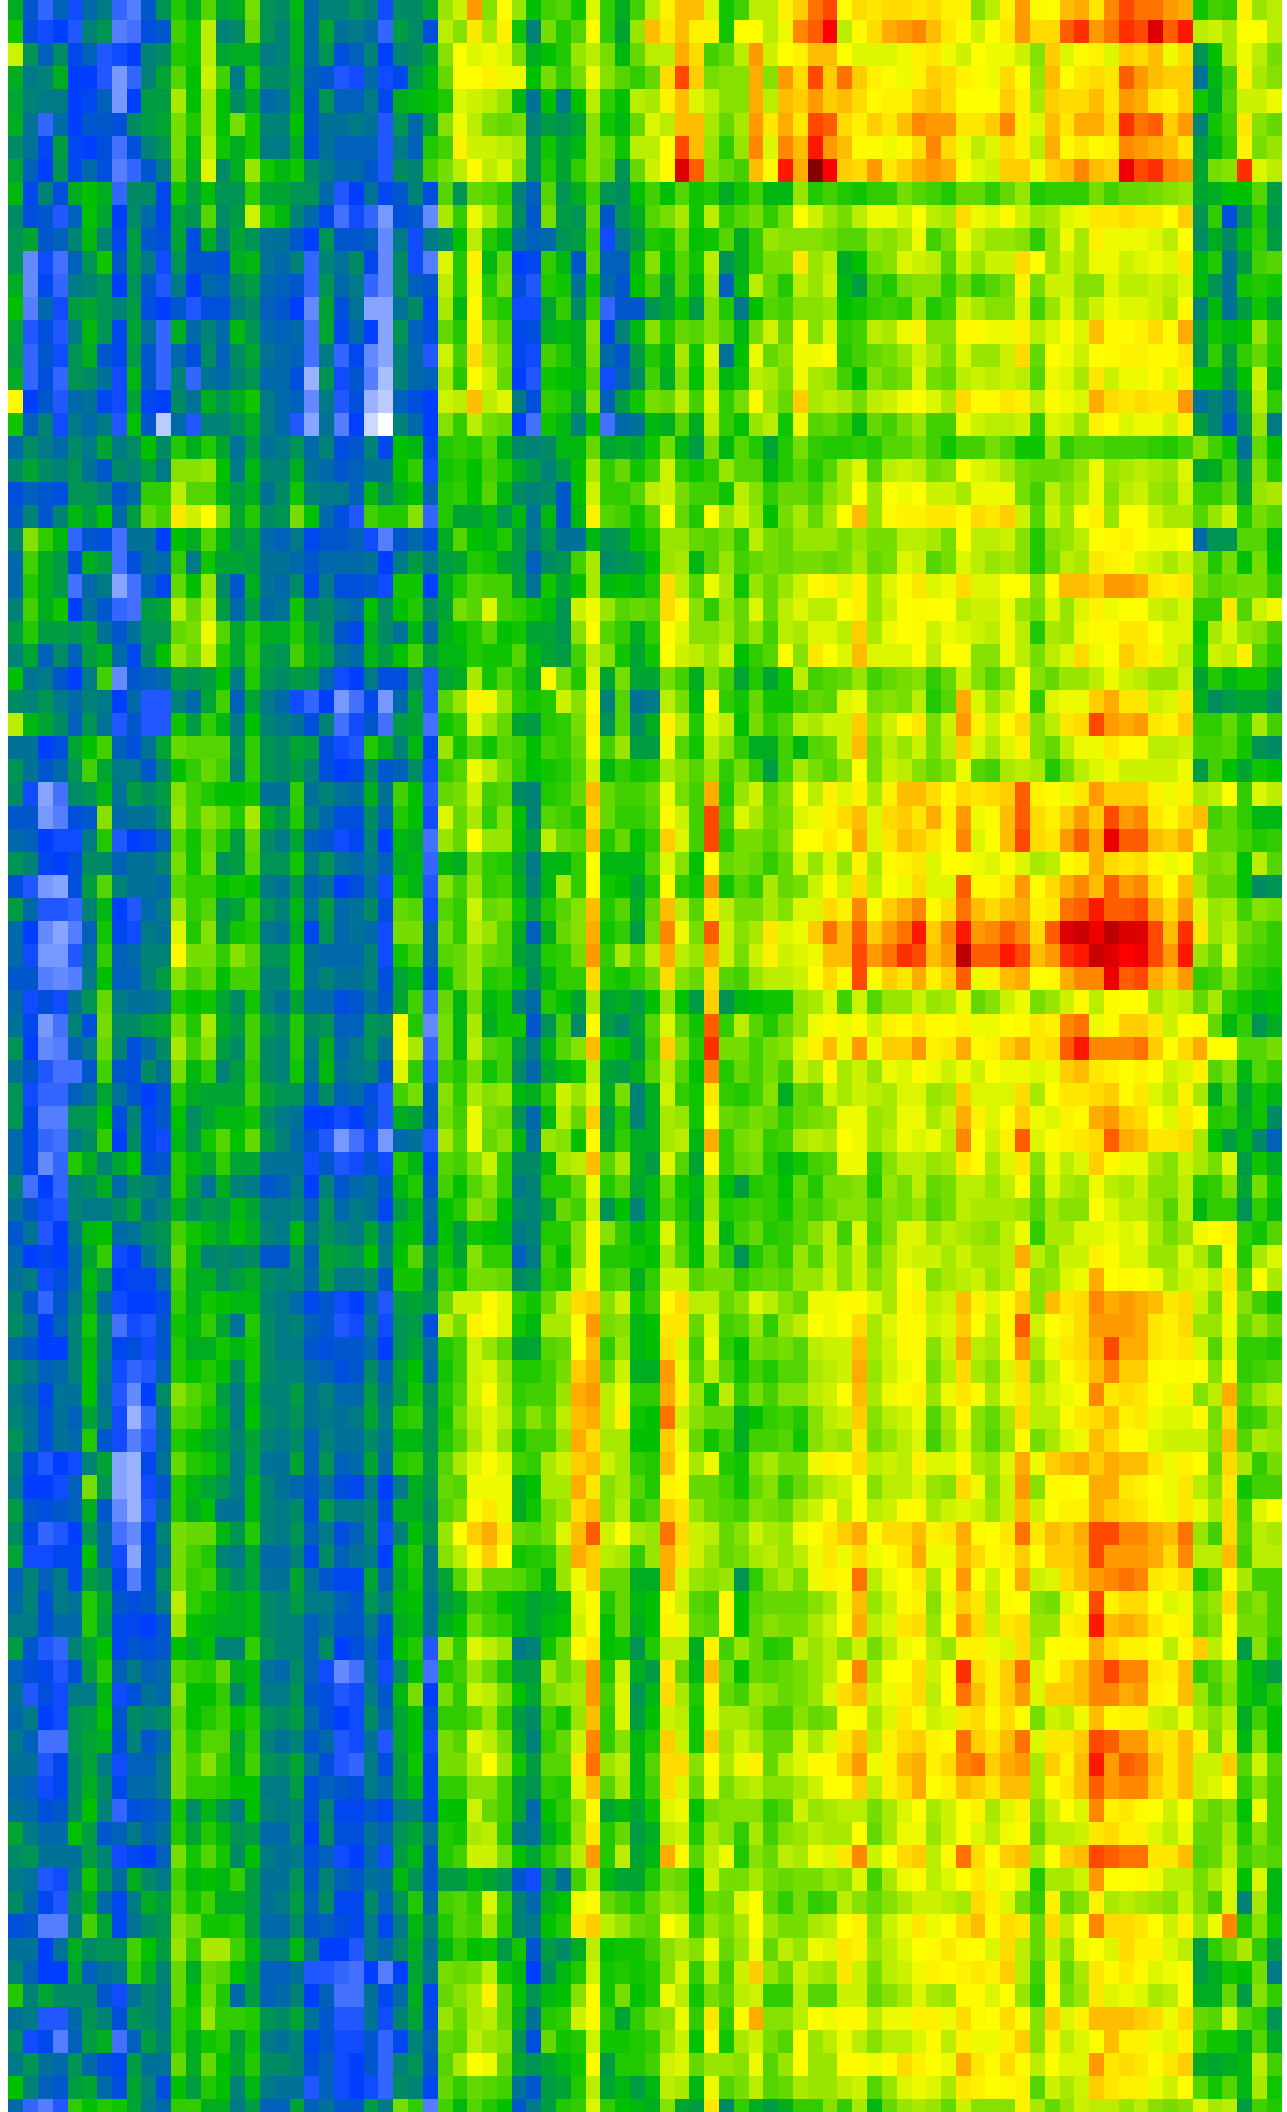

At2g07783  
At1g35780  
At3g45740  
At5g18750  
At3g44850  
At3g63470  
At2g01750  
At5g18620  
At2g47760  
At5g49550  
At3g57930  
At5g50180  
At3g07180  
At2g30620  
At3g13030  
At3g19515  
At2g39280  
At3g20780  
At4g35335  
At5g60400  
At3g13620  
At4g00420  
At5g41850  
At1g19580  
At4g13950  
At5g41600  
At3g53440  
At1g16640  
At4g02670  
At1g79460  
At1g54060  
At3g63440  
At4g20930  
At2g07707  
At3g51950  
At5g37020  
At1g30330  
At5g62960  
At1g49480  
At1g79420  
At3g54080  
At5g12440  
At1g60630  
At5g26960  
At3g52920  
At3g50780  
At1g67750  
At2g17020  
At4g18020  
At5g41870  
At1g04550  
At5g19670  
At5g18930  
At1g80050  
At2g35110  
At5g61480  
At1g80060  
At1g30490  
At2g33860  
At1g70510  
At1g11420  
At1g23380  
At2g31160  
At5g13300  
At5g08100  
At3g24660  
At4g11130  
At2g33610  
At2g30590  
At3g23295  
At3g23290  
At3g06130  
At4g13640  
At4g04970  
At3g10870  
At1g12430  
At2g33620  
At1g17480  
At2g39220  
At2g41890  
At1g69910  
At3g24770  
At3g24890  
At4g09550  
At5g61070  
At3g22590  
At1g11630  
At1g65370  
At3g06450  
At5g65450  
At4g35550  
At1g12820

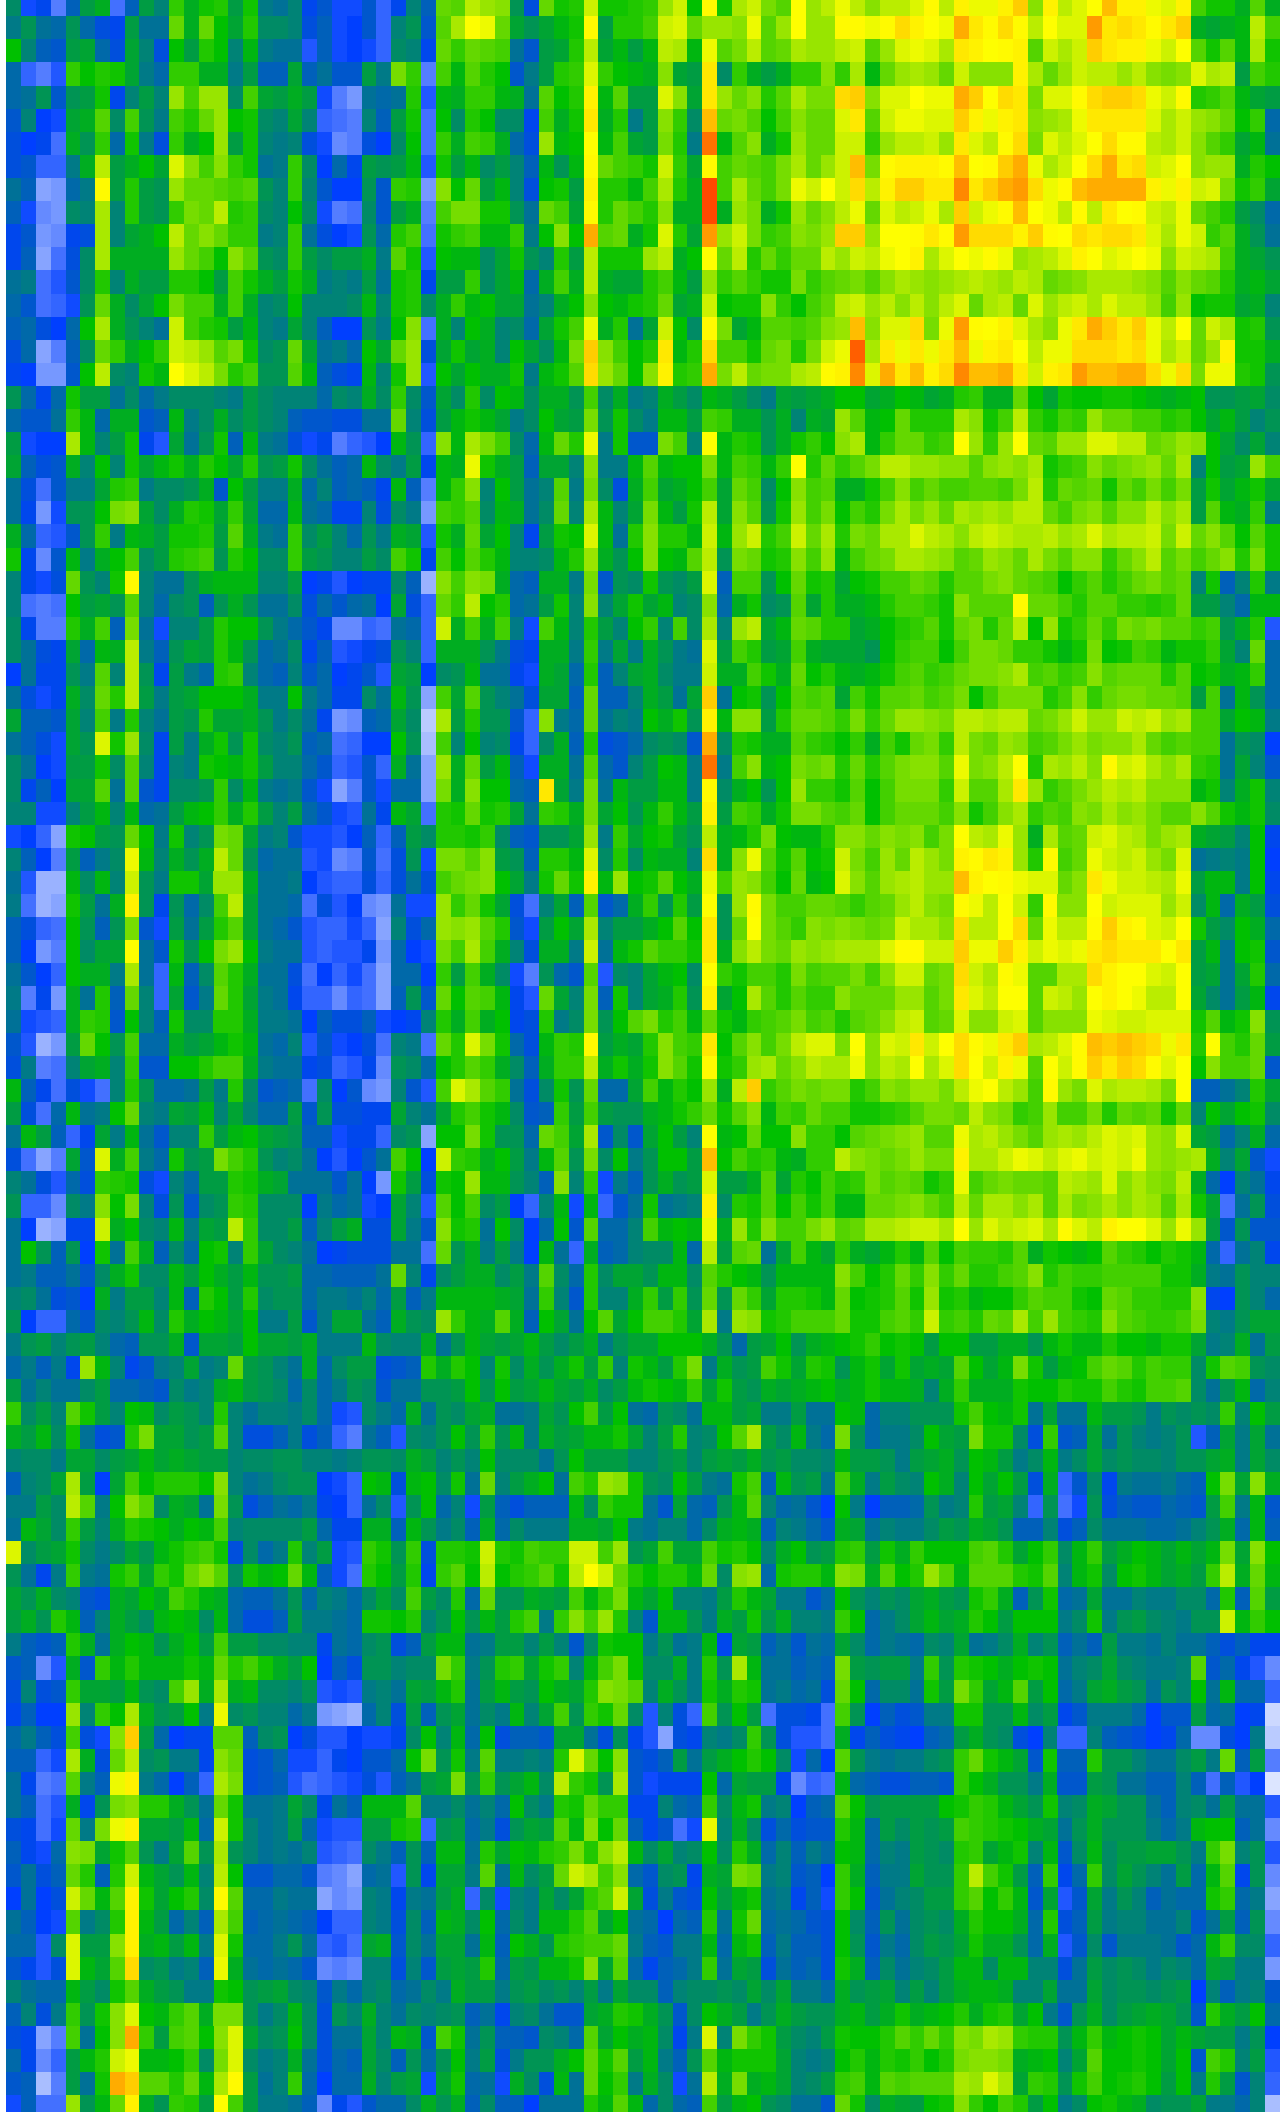

At3g06450  
At5g65450  
At4g35550  
At1g12820  
At5g66320  
At5g14370  
At4g34980  
At1g63670  
At2g22670  
At3g15095  
At4g16442  
At3g08890  
At2g23360  
At1g06080  
At4g04630  
At3g04860  
At2g31440  
At5g03190  
At2g34720  
At2g41140  
At5g04560  
At5g49820  
At3g11620  
At5g45020  
At3g55480  
At1g63080  
At3g49050  
At5g58970  
At5g62940  
At4g32330  
At5g57880  
At1g73760  
At1g61170  
At5g43270  
At3g19960  
At4g21650  
At1g71180  
At3g57470  
At5g13690  
At5g37290  
At1g34220  
At1g63130  
At5g67150  
At3g21060  
At1g25375  
At4g15930  
At5g51550  
At1g43170  
At1g49840  
At1g14685  
At2g42300  
At3g12150  
At1g67590  
At3g06840  
At5g48880  
At1g48110  
At5g17030  
At5g17010  
At1g80580  
At1g18680  
At1g79100  
At5g61540  
At1g31220  
At4g18570  
At3g59410  
At1g27070  
At2g35570  
At3g60310  
At3g45750  
At2g30780  
At1g70060  
At3g59140  
At1g21460  
At1g64970  
At3g18490  
At3g48560  
At5g24690  
At1g27510  
At4g13460  
At1g20650  
At3g59490  
At4g20030  
At5g53940  
At5g27270  
At5g16180  
At1g67440  
At3g44950  
At2g40960  
At5g44660  
At5g08340  
At5g45040  
At3g02050

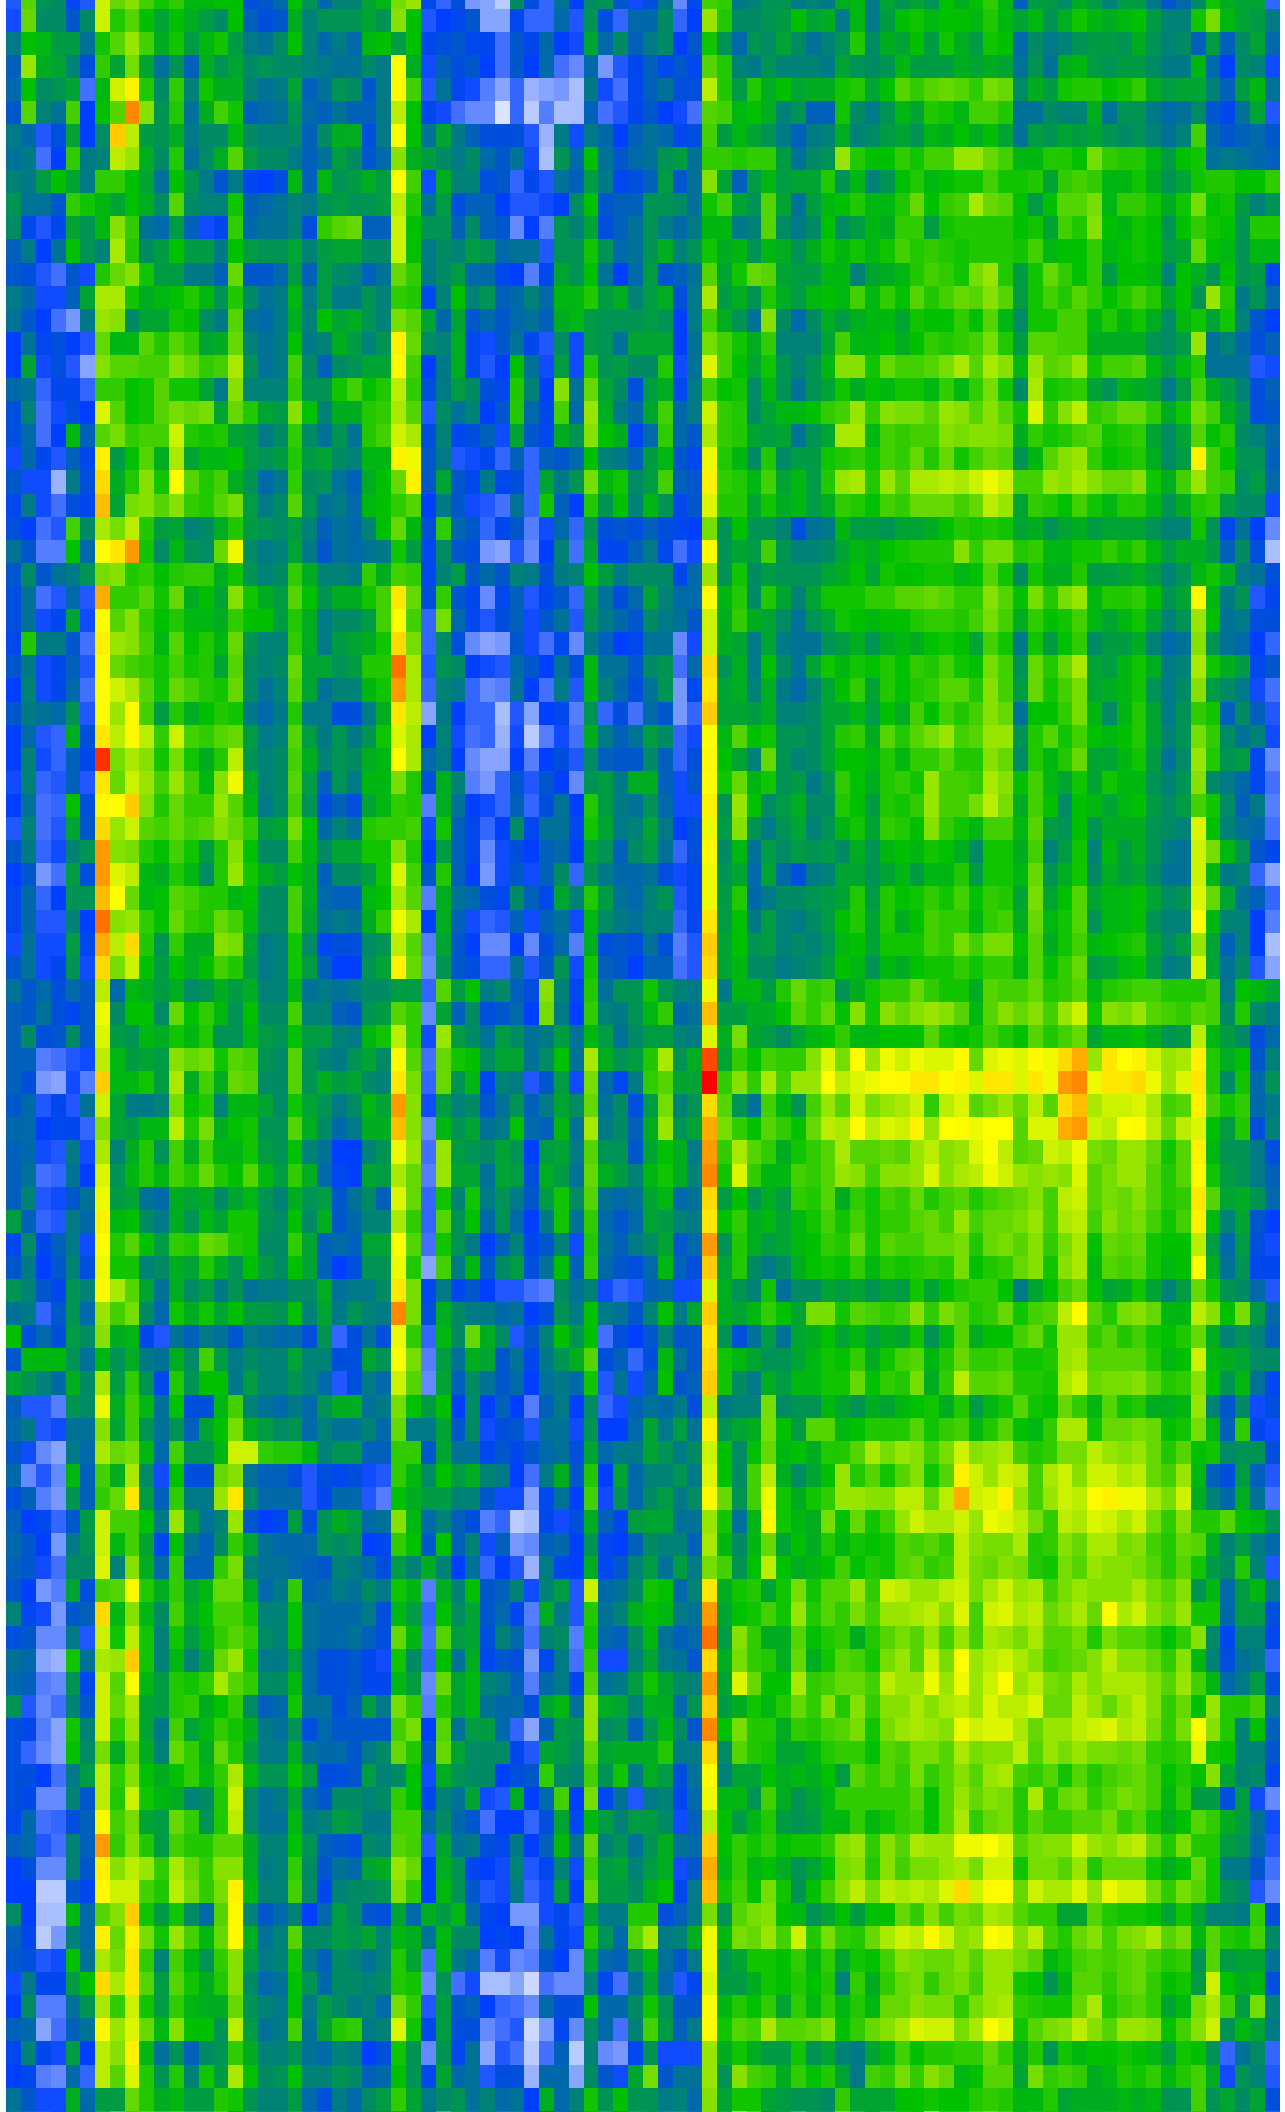

At1g78040  
At5g35770  
At3g49220  
At5g63380  
At5g09870  
At5g23730  
At1g01060  
At5g15440  
At5g11950  
At3g57040  
At4g15430  
At3g22960  
At2g42870  
At3g60530  
At4g14440  
At1g27950  
At4g34250  
At5g01075  
At5g62130  
At1g26650  
At3g54790  
At1g12845  
At2g23180  
At1g70100  
At5g02540  
At1g55260  
At5g45950  
At3g43720  
At4g18970  
At2g26250  
At4g00400  
At1g65295  
At4g23820  
At4g36250  
At5g15310  
At1g16750  
At1g77870  
At3g20820  
At5g14410  
At3g61550  
At2g26910  
At4g25960  
At1g48330  
At5g26230  
At1g70270  
At3g02110  
At1g48480  
At1g70830  
At3g52540  
At1g02205  
At1g02205  
At1g56720  
At3g44610  
At5g13400  
At5g57800  
At1g10020  
At1g48240  
At4g39400  
At4g33180  
At5g67230  
At4g38520  
At2g32690  
At3g05100  
At2g45810  
At4g32570  
At2g30980  
At5g58560  
At2g32810  
At1g16020  
At3g62630  
At2g28470  
At5g62670  
At1g12460  
At3g59110  
At5g01090  
At4g13100  
At1g75190  
At1g71695  
At1g09390  
At2g36050  
At1g34630  
At1g17200  
At1g70280  
At3g45850  
At1g05590  
At3g02180  
At3g10080  
At3g23805  
At1g30120  
At5g08415  
At4g09500

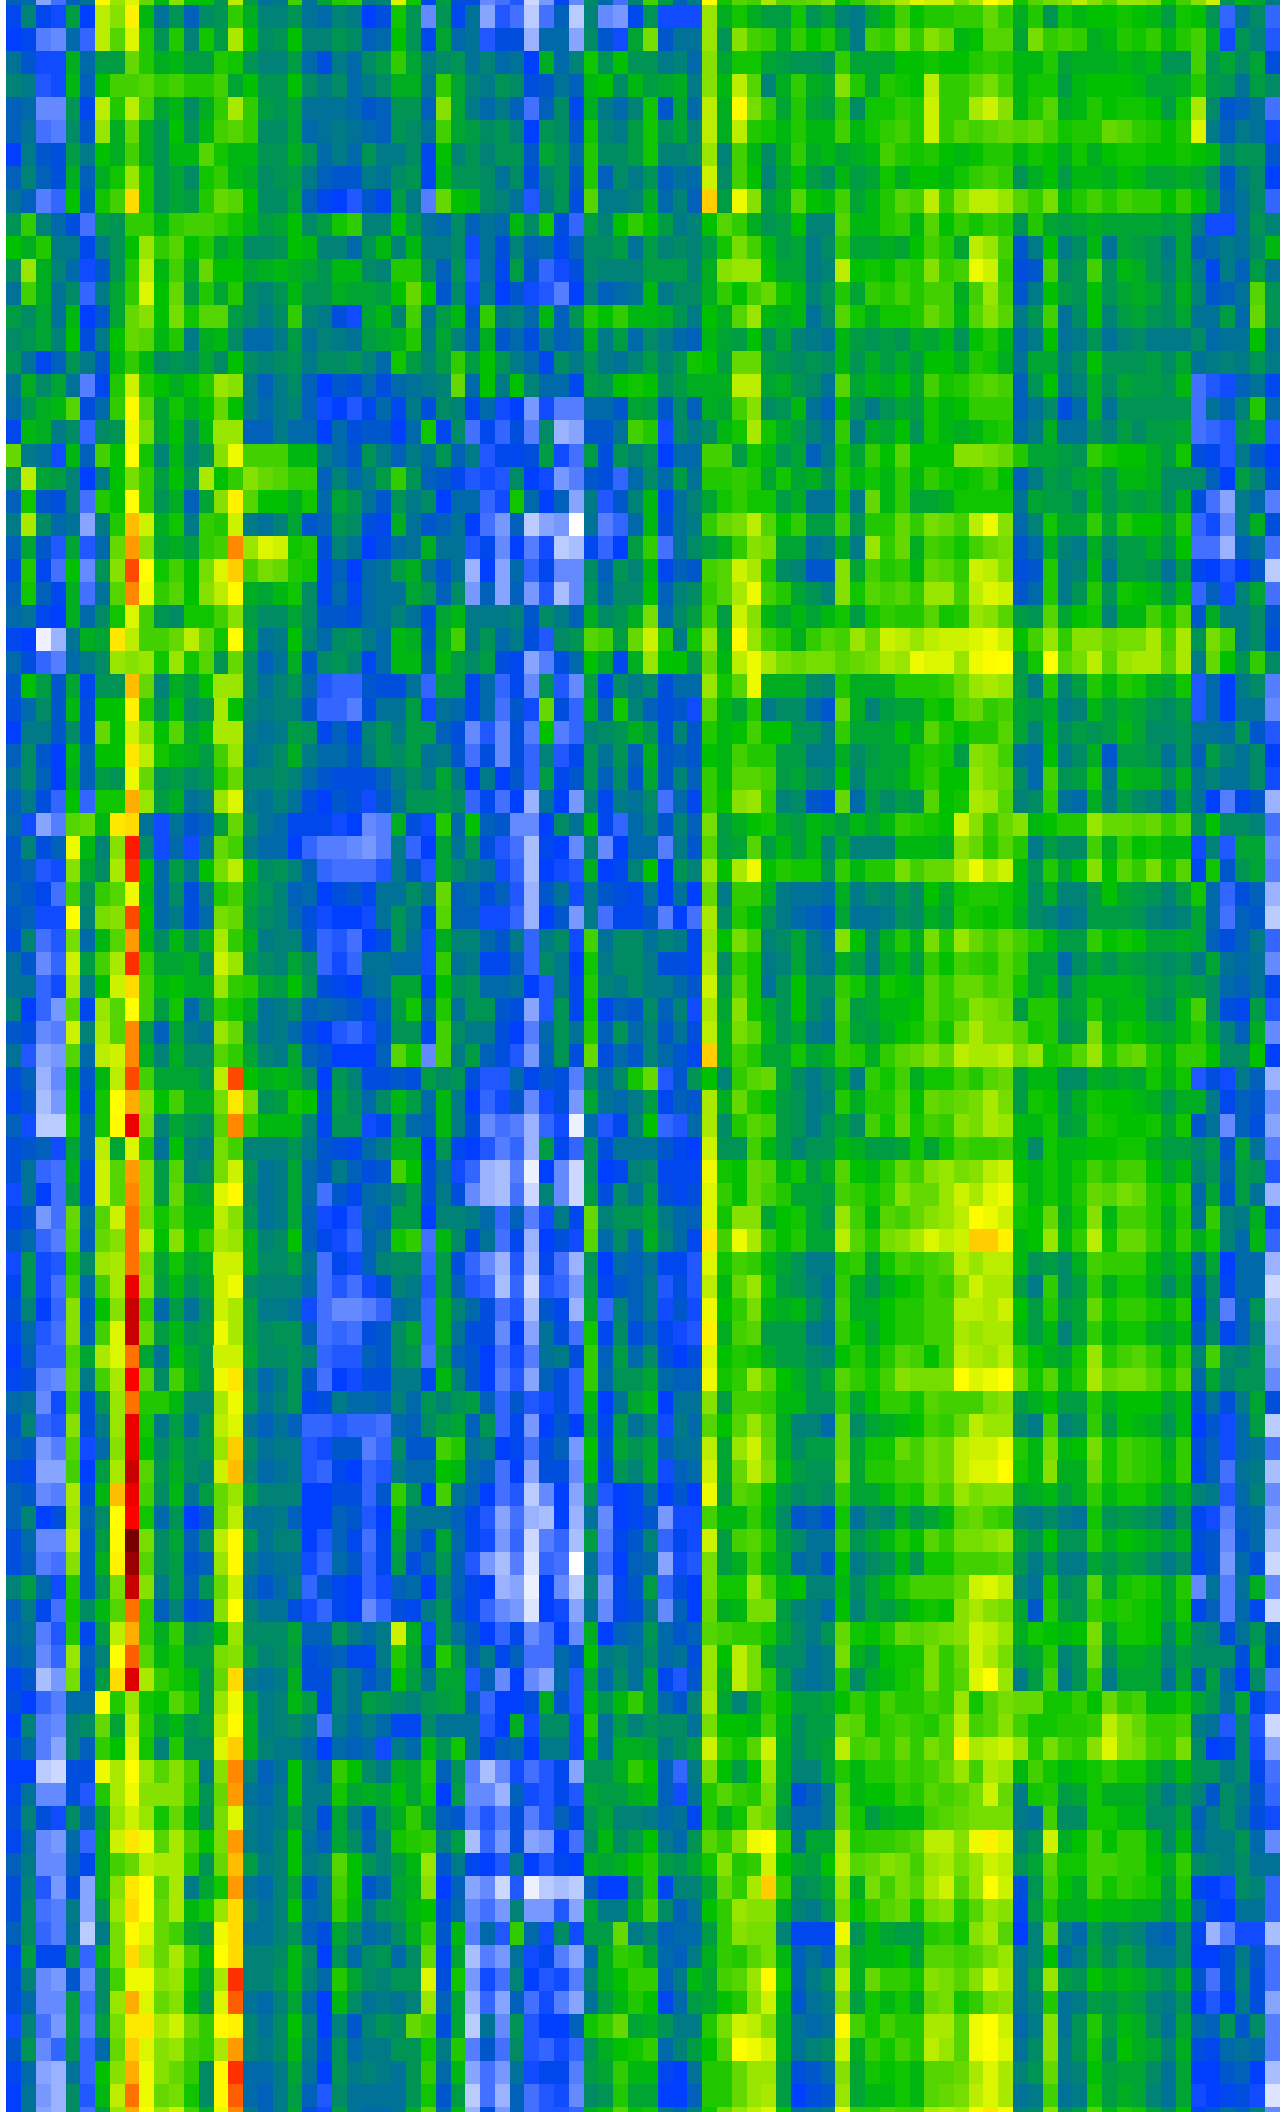

At1g30120  
At5g08415  
At4g09500  
At3g14395  
At1g11850  
At5g49330  
At1g68540  
At3g23840  
At3g55710  
At5g55400  
At2g28210  
At2g25820  
At3g57980  
At5g46100  
At1g12700  
At5g12110  
At2g43630  
At4g21180  
At2g29690  
At2g32040  
At5g59480  
At4g14360  
At1g11790  
At2g25870  
At3g58830  
At2g30320  
At4g26420  
At1g55805  
At4g18590  
At5g39790  
At4g18390  
At4g27620  
At1g31690  
At1g31680  
At3g15030  
At5g10460  
At2g45990  
At3g16100  
At5g59770  
At5g21100  
At3g03770  
At4g24810  
At5g53200  
At1g61350  
At4g37080  
At2g40540  
At1g24610  
At3g05180  
At2g33255  
At3g28130  
At5g15050  
At2g26900  
At2g42190  
At4g22560  
At2g38540  
At4g11100  
At3g28760  
At4g26520  
At4g33000  
At4g10470  
At3g16830  
At3g46100  
At3g57180  
At3g23070  
At2g30150  
At5g64940  
At3g10840  
At4g00370  
At4g28706  
At4g25370  
At4g34610  
At1g60590  
At4g12970  
At5g18590  
At5g02240  
At3g61700  
At2g35780  
At3g22120  
At3g44430  
At1g49510  
At5g64050  
At3g57560  
At1g15710  
At5g63050  
At3g04650  
At3g27180  
At4g02990  
At5g24020  
At3g51870  
At3g18680  
At1g11430

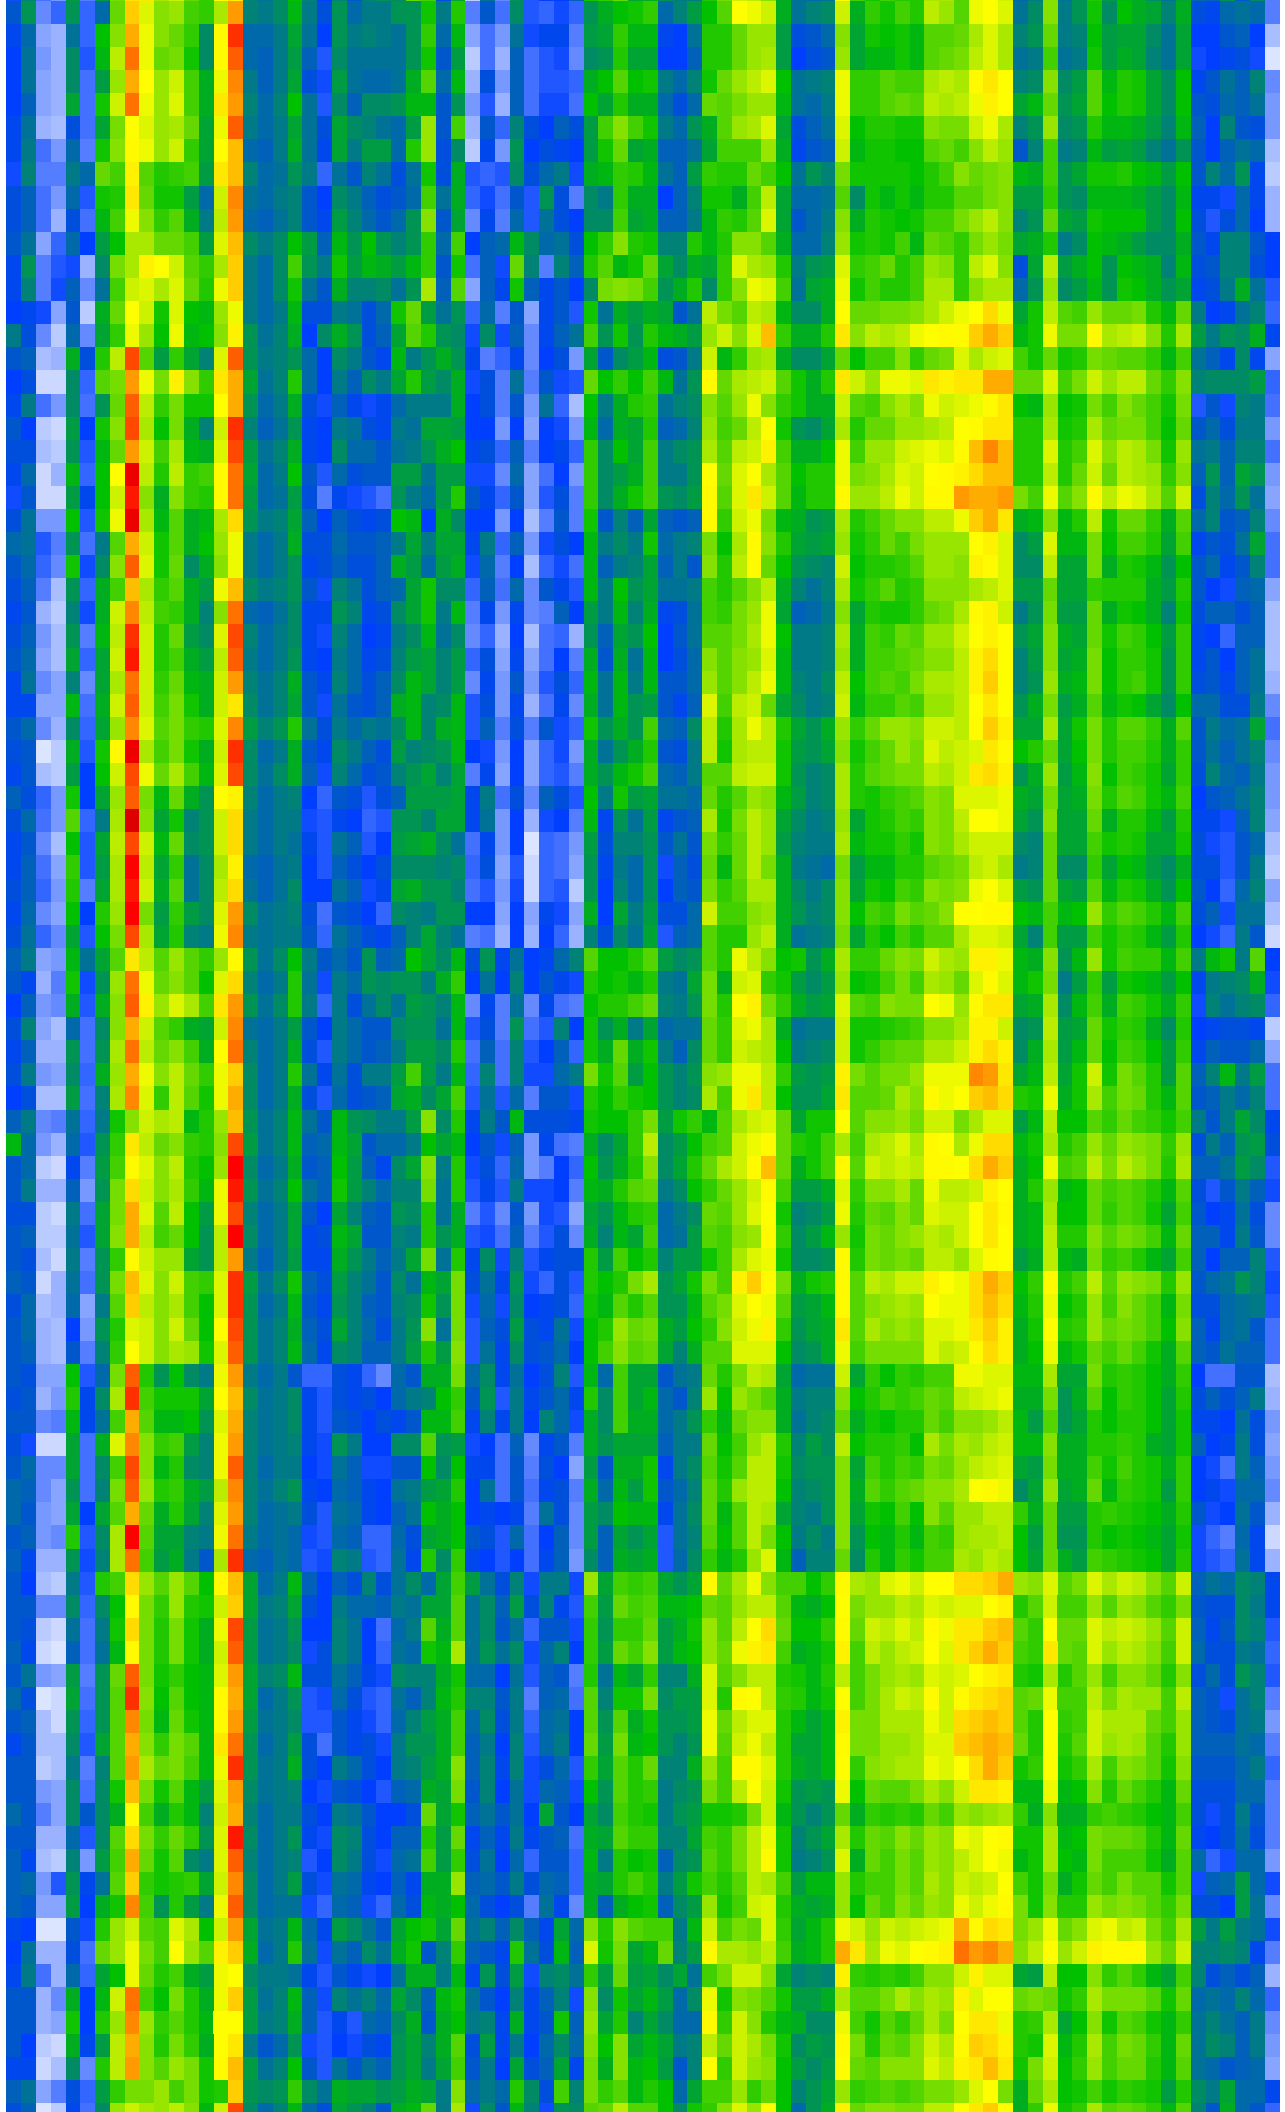

At3g51870  
At3g18680  
At1g11430  
At4g28210  
At1g74850  
At2g33430  
At2g39140  
At1g31160  
At4g26370  
At3g53460  
At1g23180  
At3g24506  
At2g02740  
At1g63850  
At3g25680  
At3g10160  
At3g18110  
At5g55280  
At4g39620  
At3g09150  
At5g17660  
At3g49470  
At1g30520  
At1g49630  
At2g14660  
At5g39970  
At3g14100  
At3g28460  
At4g20130  
At4g20130  
At5g57180  
At1g17850  
At5g22640  
At4g30620  
At1g11290  
At3g03710  
At5g42130  
At5g52010  
At3g60620  
At5g10690  
At5g14460  
At4g19540  
At4g14510  
At5g10910  
At2g14880  
At3g06730  
At5g15390  
At1g09900  
At5g27440  
At4g24175  
At2g44640  
At4g33760  
At4g16390  
At5g51100  
At5g07900  
At4g17550  
At1g69200  
At4g34290  
At1g10522  
At3g59040  
At2g31890  
At5g48470  
At2g18940  
At5g64580  
At3g03630  
At3g13490  
At2g45270  
At2g39670  
At1g30610  
At4g18750  
At1g79560  
At5g23310  
At3g63510  
At4g23940  
At3g13180  
At3g04260  
At2g34640  
At3g17160  
At5g63420  
At3g54090  
At1g63680  
At2g04530  
At3g16290  
At3g18800  
At4g00180  
At2g47840  
At1g59720  
At4g01460  
At4g32900  
At1g12860  
At2g41340  
At1g03280

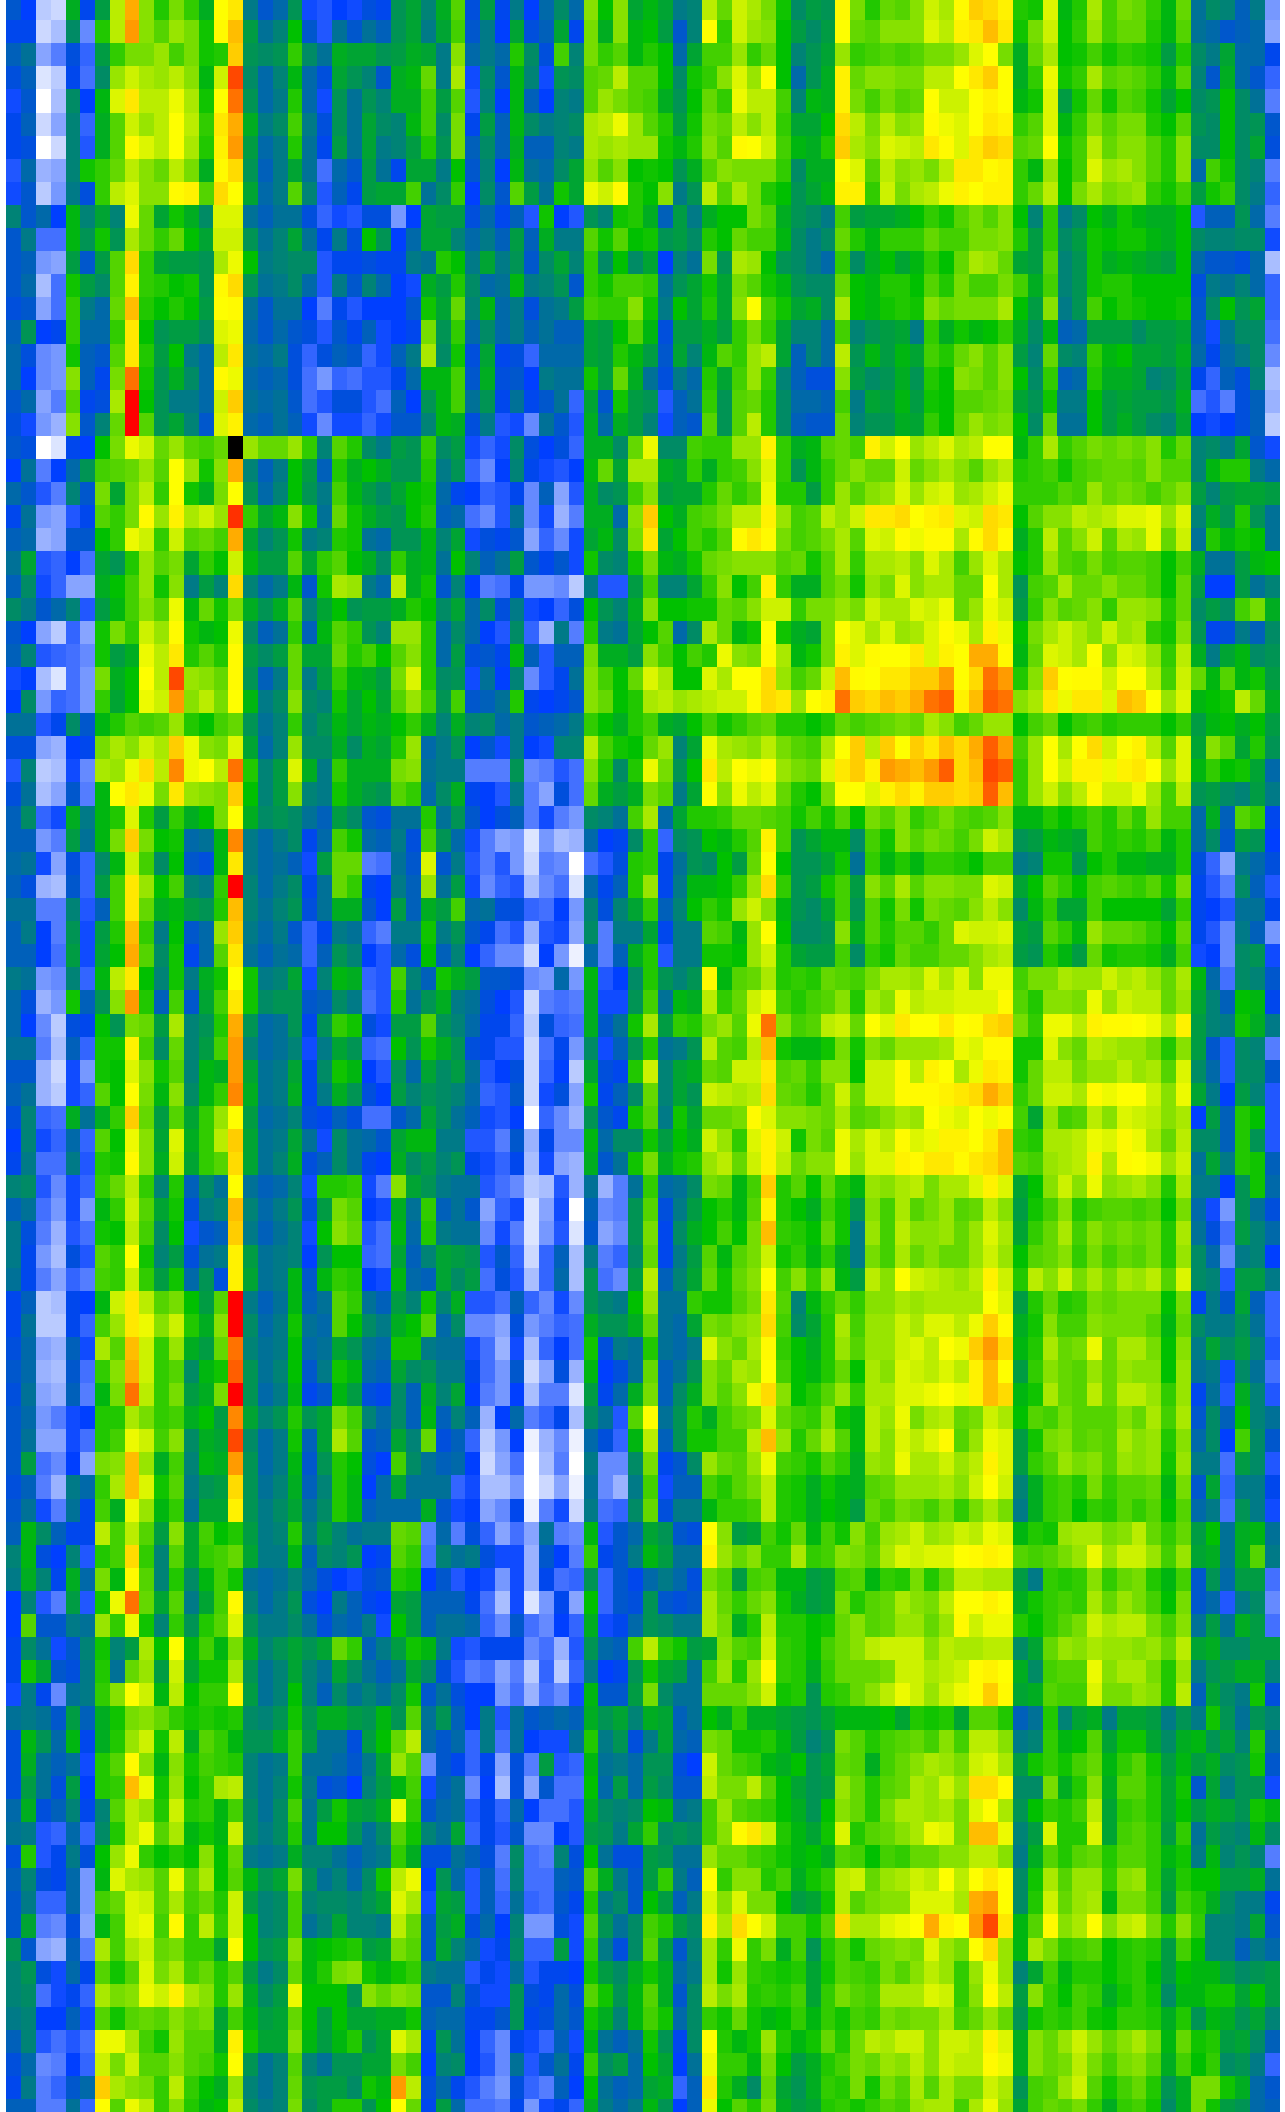

At4g32900  
At1g12860  
At2g41340  
At1g02280  
At5g20130  
At5g19210  
At3g16260  
At4g38490  
At3g12210  
At1g34380  
At1g26090  
At5g08540  
At5g50110  
At5g44785  
At1g74040  
At5g55580  
At3g02060  
At1g10510  
At3g53700  
At5g48630  
At1g05430  
At1g01220  
At3g03980  
At4g18460  
At2g46570  
At3g54400  
At2g28050  
At3g54220  
At3g49950  
At5g52180  
At4g16120  
At5g16640  
At3g48040  
At5g09995  
At2g39560  
At3g02870  
At2g39080  
At1g53240  
At4g33680  
At3g13470  
At5g01590  
At3g49680  
At4g30610  
At1g19920  
At4g39120  
At2g33330  
At2g30200  
At1g66430  
At5g21060  
At2g39290  
At1g50575  
At4g12420  
At5g46290  
At3g25860  
At1g34430  
At5g35360  
At3g60210  
At4g39460  
At1g09760  
At1g53520  
At3g53900  
At1g52670  
At2g22240  
At5g16390  
At3g02900  
At4g01900  
At2g35650  
At3g01810  
At4g02130  
At1g74960  
At1g63260  
At1g80500  
At3g20390  
At1g14140  
At1g33930  
At4g21890  
At3g02250  
At3g21950  
At1g60270  
At4g02850  
At1g70090  
At1g63170  
At1g25450  
At4g16140  
At3g52290  
At3g58000  
At5g62170  
At1g02720  
At1g71020  
At2g15090  
At4g34760  
At5g02890

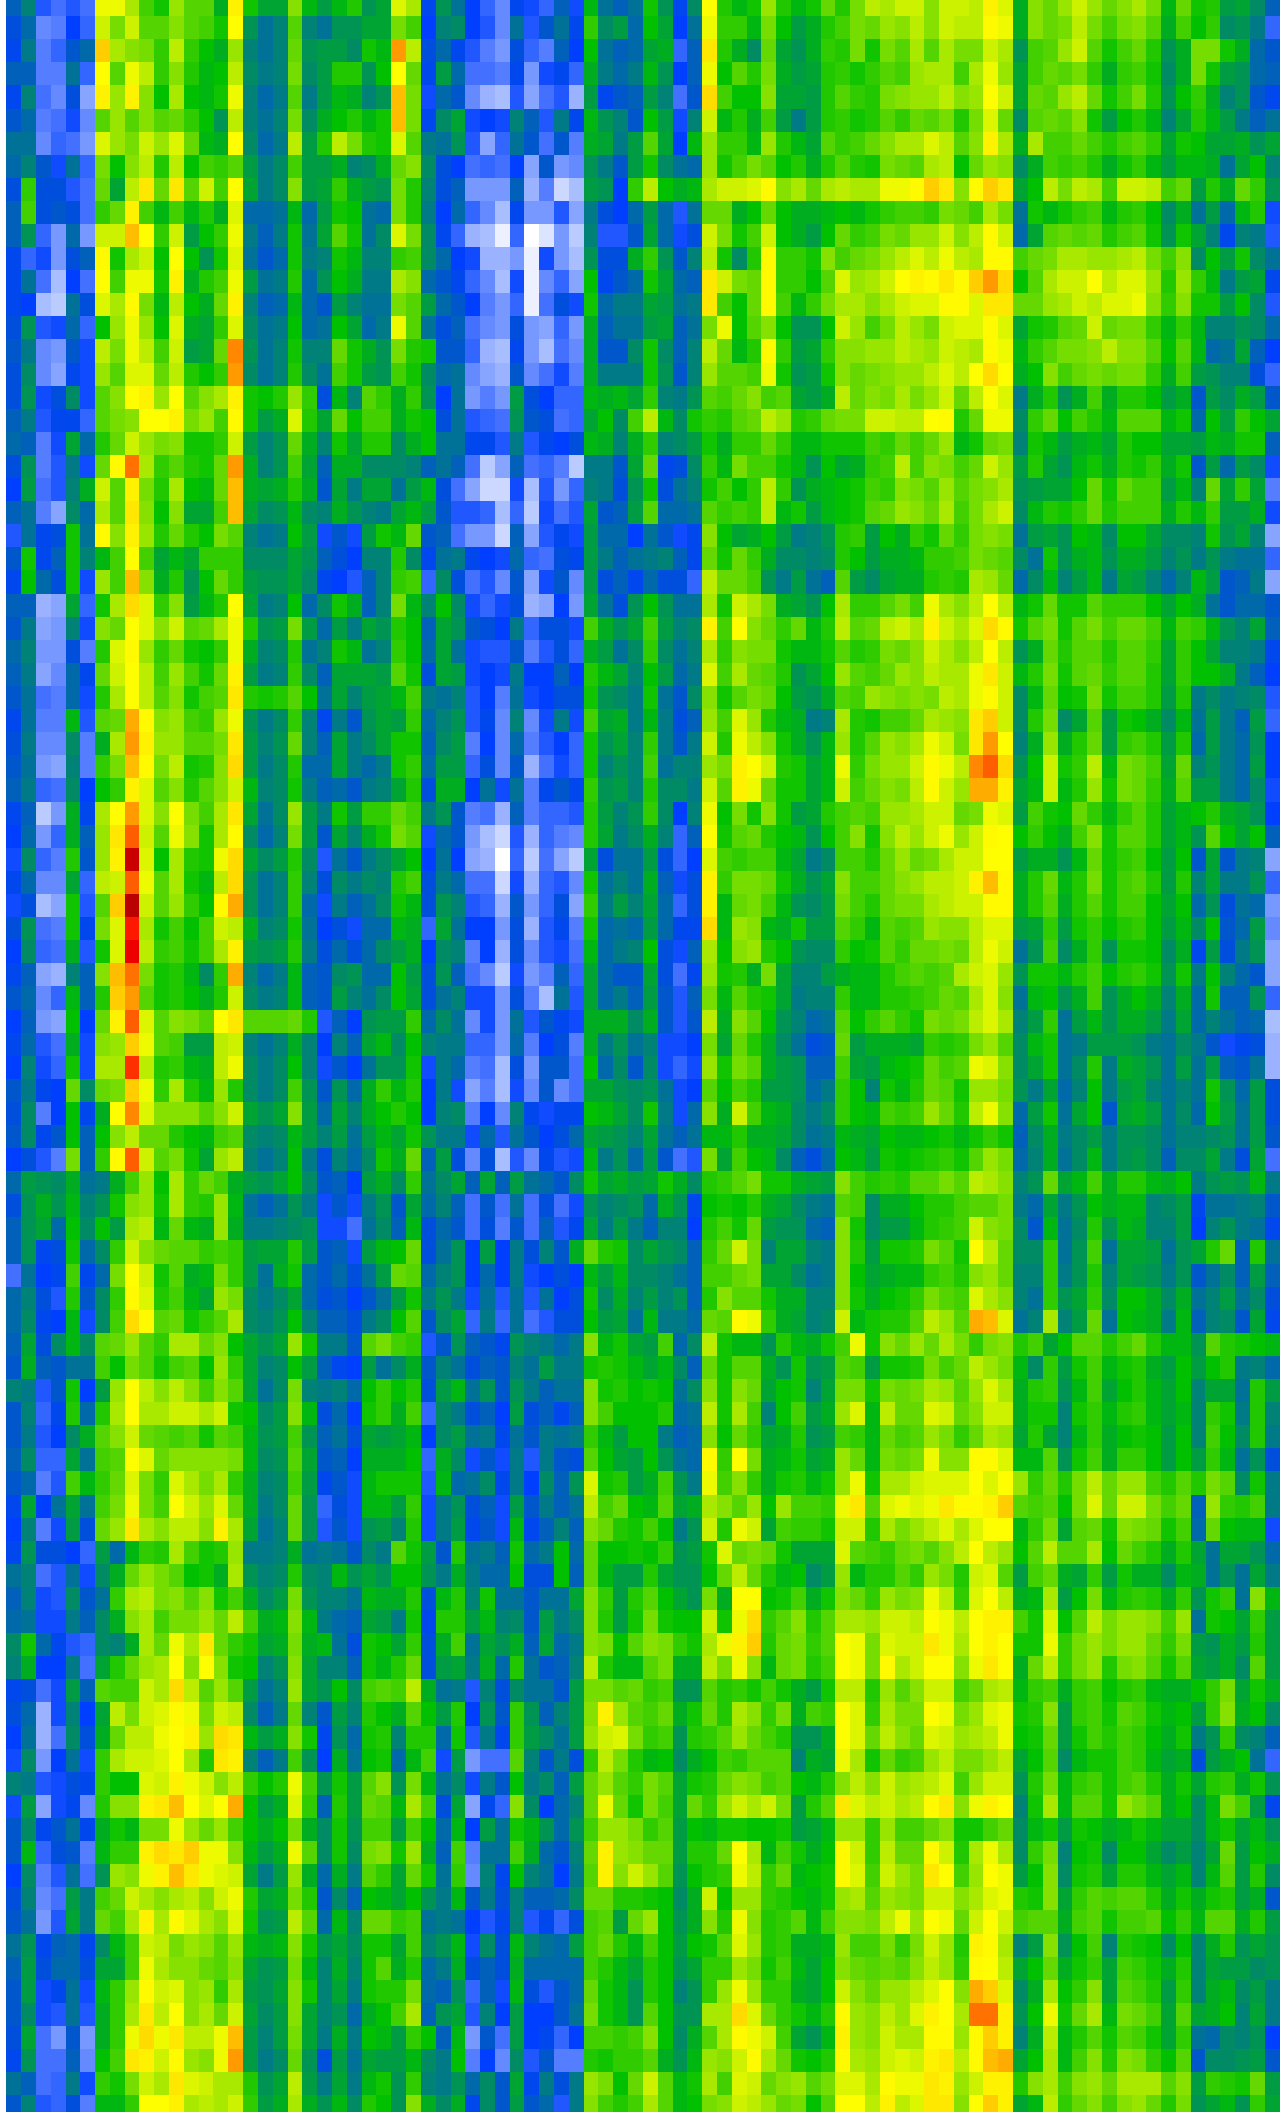

At1g71020  
At2g15090  
At4g34760  
At5g02890  
At2g45470  
At4g29020  
At3g07210  
At1g08960  
At1g67950  
At4g34260  
At3g08600  
At5g10560  
At1g13250  
At1g51570  
At2g36870  
At1g79720  
At5g64620  
At2g20250  
At2g29680  
At1g76870  
At4g16155  
At1g68260  
At3g62110  
At5g16150  
At5g50915  
At3g29030  
At1g23205  
At3g61950  
At2g36885  
At2g40300  
At1g27285  
At5g46690  
At1g04110  
At4g28780  
At4g28160  
At5g24000  
At2g35155  
At4g19985  
At4g34220  
At1g78180  
At5g01015  
At5g10620  
At3g23760  
At5g48490  
At1g26180  
At2g46870  
At3g49260  
At4g04750  
At2g39690  
At1g31450  
At4g19070  
At1g74910  
At3g50920  
At5g03350  
At2g35700  
At5g46830  
At1g52770  
At2g04032  
At2g35600  
At2g28190  
At2g19280  
At3g06520  
At5g15160  
At1g71050  
At4g09970  
At1g52530  
At1g08390  
At3g57780  
At2g45900  
At3g44740  
At5g20450  
At5g17240  
At3g56300  
At5g41480  
At5g42670  
At1g71460  
At5g15760  
At1g80880  
At2g03050  
At1g50280  
At3g55690  
At5g58370  
At1g03300  
At3g56270  
At4g17860  
At1g48820  
At3g52550  
At3g61840  
At1g66520  
At3g56330  
At5g59900  
At1g28090



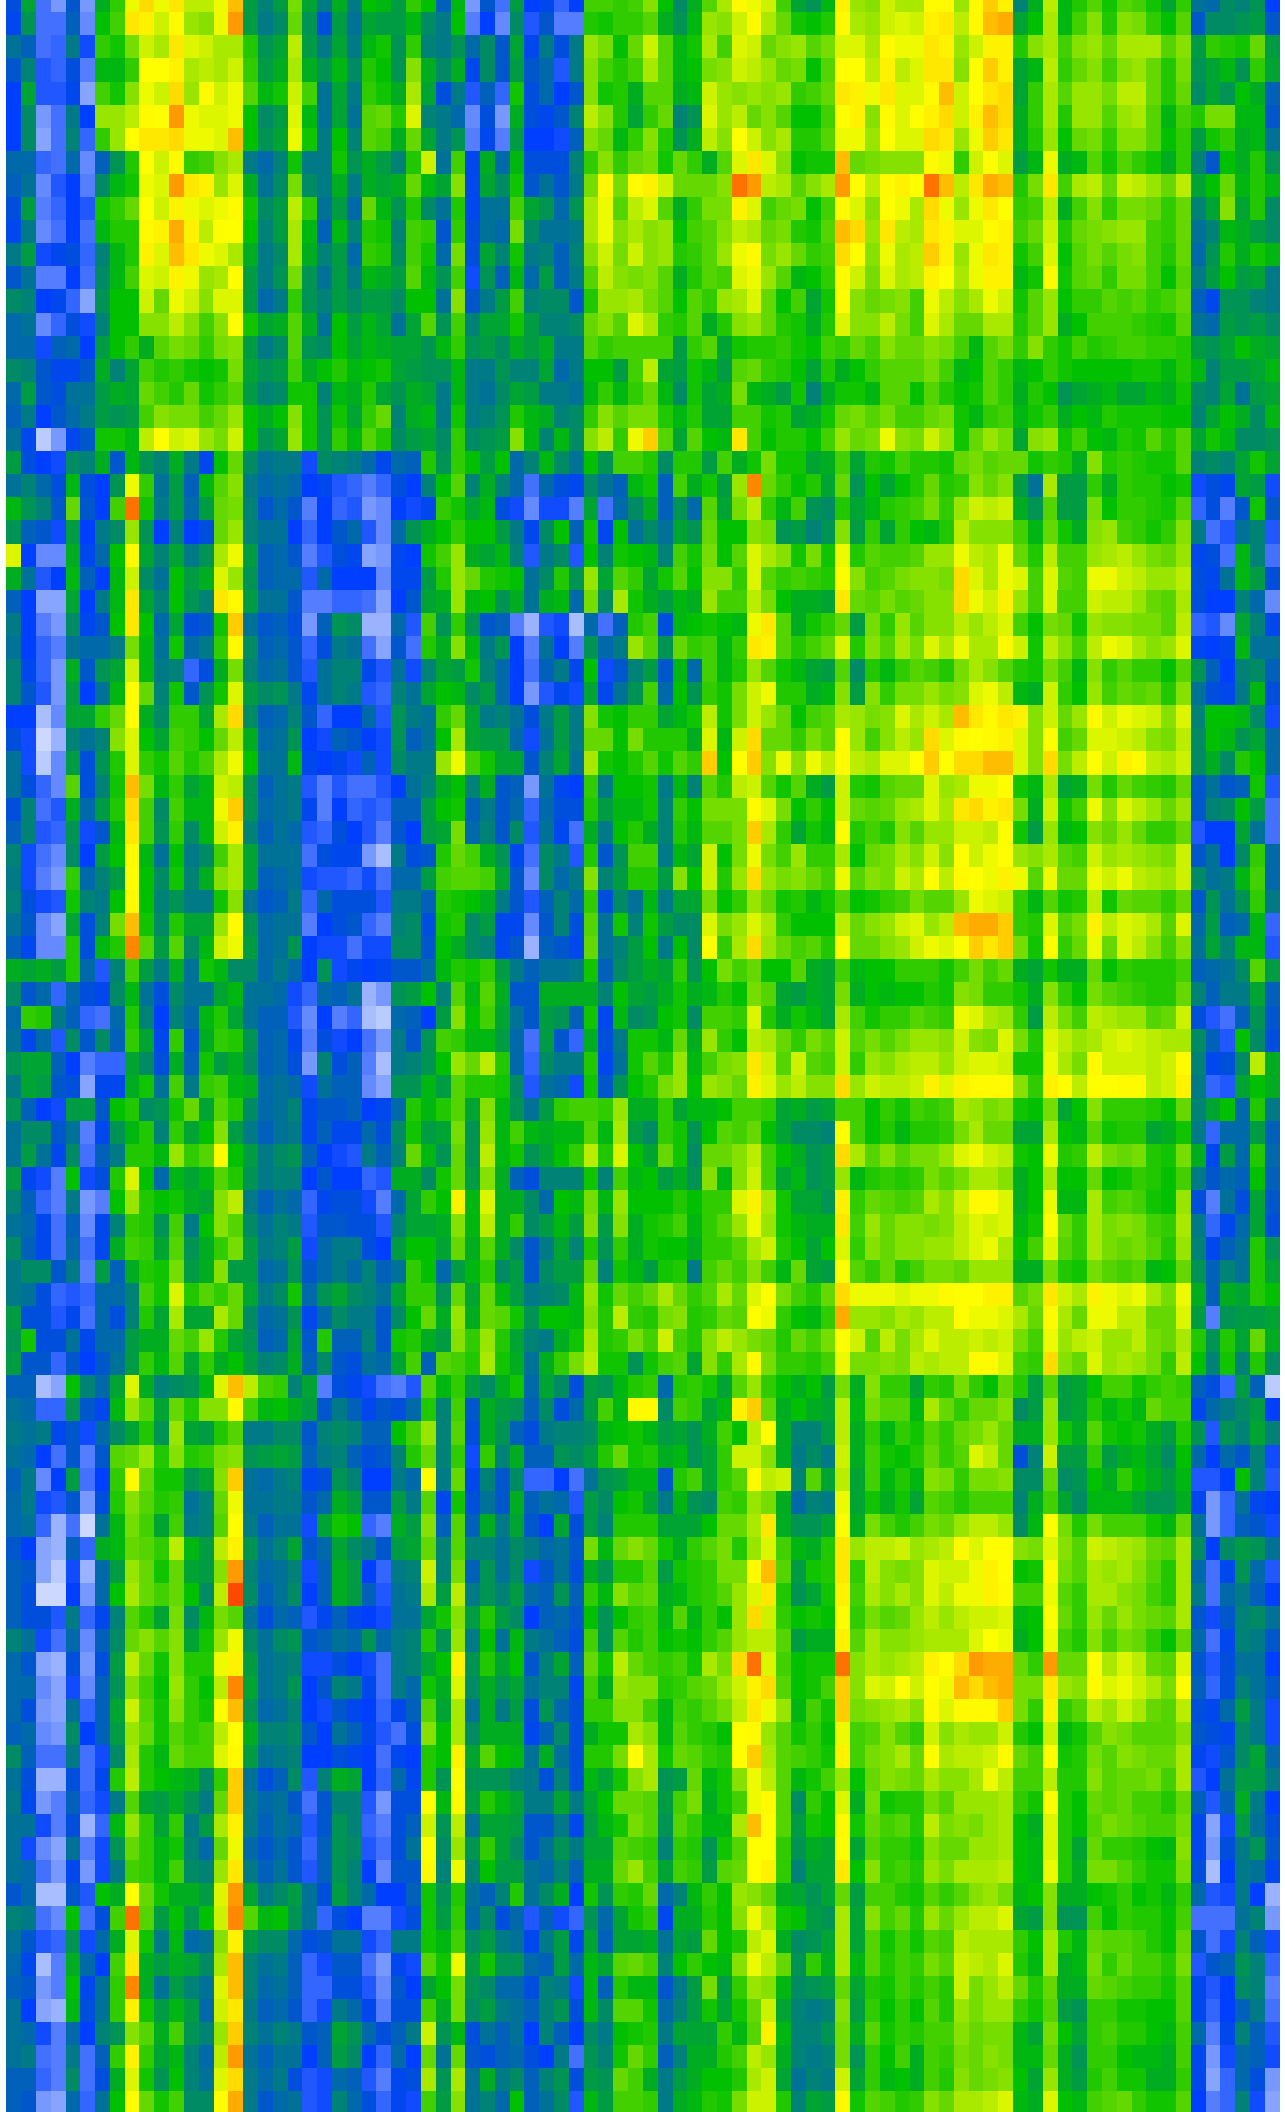

At1g06320  
At3g56330  
At5g59900  
At1g28090  
At3g53680  
At5g38360  
At2g40690  
At3g55160  
At5g14600  
At1g78690  
At5g35400  
At4g16700  
At3g20440  
At1g11320  
At4g21300  
At4g13650  
At5g47510  
At2g03320  
At5g42450  
At4g00530  
At1g19690  
At4g35680  
At3g13070  
At5g57260  
At5g24650  
At5g47970  
At5g42480  
At3g57610  
At1g09830  
At5g23890  
At4g10800  
At5g51140  
At3g44380  
At2g22650  
At1g79080  
At2g46090  
At2g22870  
At5g61290  
At4g01570  
At5g14220  
At3g62000  
At3g29375  
At1g56345  
At4g14300  
At3g26430  
At5g56130  
At1g14710  
At1g13020  
At3g24000  
At1g02430  
At2g23740  
At1g06730  
At1g62390  
At4g20740  
At2g23730  
At1g52360  
At4g28010  
At4g09980  
At1g01950  
At3g26920  
At1g04710  
At5g43140  
At4g27640  
At2g30160  
At2g04030  
At4g34740  
At5g04430  
At4g30000  
At3g46740  
At1g06950  
At2g11890  
At3g14900  
At5g23080  
At3g21300  
At1g59990  
At1g77670  
At4g31210  
At3g58610  
At5g20040  
At3g10050  
At1g74260  
At2g35040  
At3g63170  
At3g55400  
At2g47220  
At1g15390  
At3g04340  
At5g04710  
At5g63420  
At4g19710  
At4g09730  
At3g49560

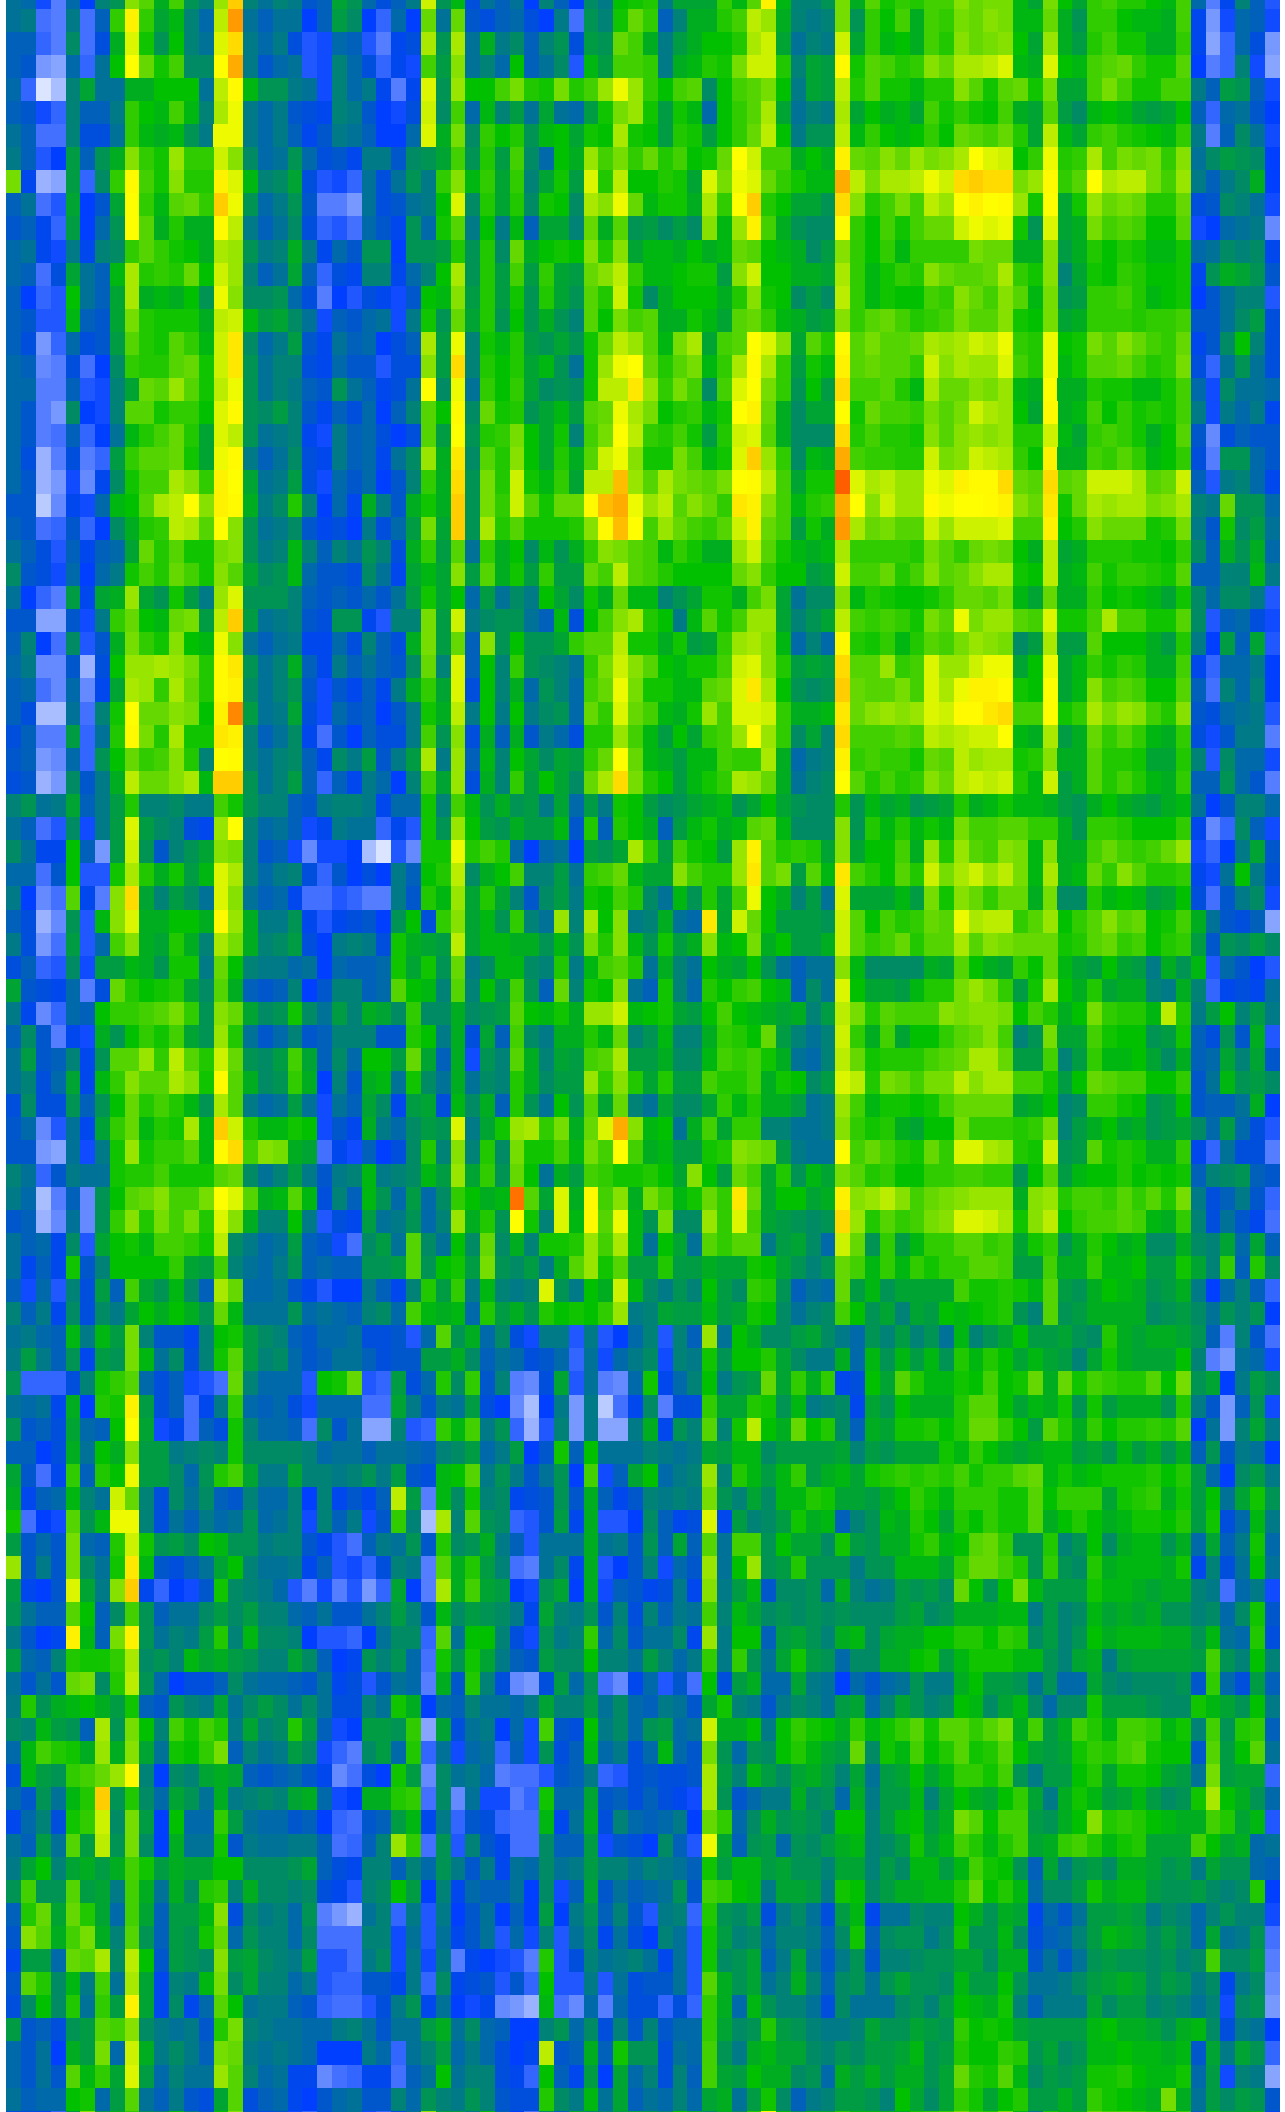

At4g19710  
At4g09730  
At3g49560  
At5g58490  
At2g29760  
At1g21650  
At1g56260  
At5g01510  
At2g31530  
At5g39940  
At1g31430  
At3g23020  
At5g13270  
At5g59600  
At1g45110  
At1g48570  
At4g38100  
At1g50000  
At5g02590  
At3g17970  
At1g48460  
At3g23710  
At1g08610  
At5g44230  
At1g56570  
At1g01860  
At1g80640  
At1g54310  
At5g08610  
At2g24120  
At3g48500  
At4g27340  
At4g30720  
At5g08400  
At1g15530  
At2g13440  
At1g29880  
At2g43240  
At1g48650  
At5g15210  
At2g18790  
At5g67360  
At1g47530  
At5g11460  
At1g78560  
At2g32415  
At3g01460  
At5g15280  
At2g32440  
At3g56680  
At4g39235  
At1g20870  
At3g26744  
At5g62030  
At5g18390  
At5g02860  
At4g14170  
At4g18290  
At1g01030  
At1g12230  
At2g38040  
At4g13050  
At3g14760  
At3g12020  
At2g39450  
At4g37330  
At5g13740  
At4g05040  
At1g18660  
At1g62540  
At5g01260  
At2g02410  
At2g01090  
At1g80760  
At2g22830  
At4g31820  
At5g32450  
At4g22540  
At1g74520  
At1g77740  
At3g26200  
At3g15354  
At1g31550  
At2g43530  
At4g16060  
At2g43560  
At4g26510  
At2g02410  
At5g64860  
At4g33460  
At1g14720

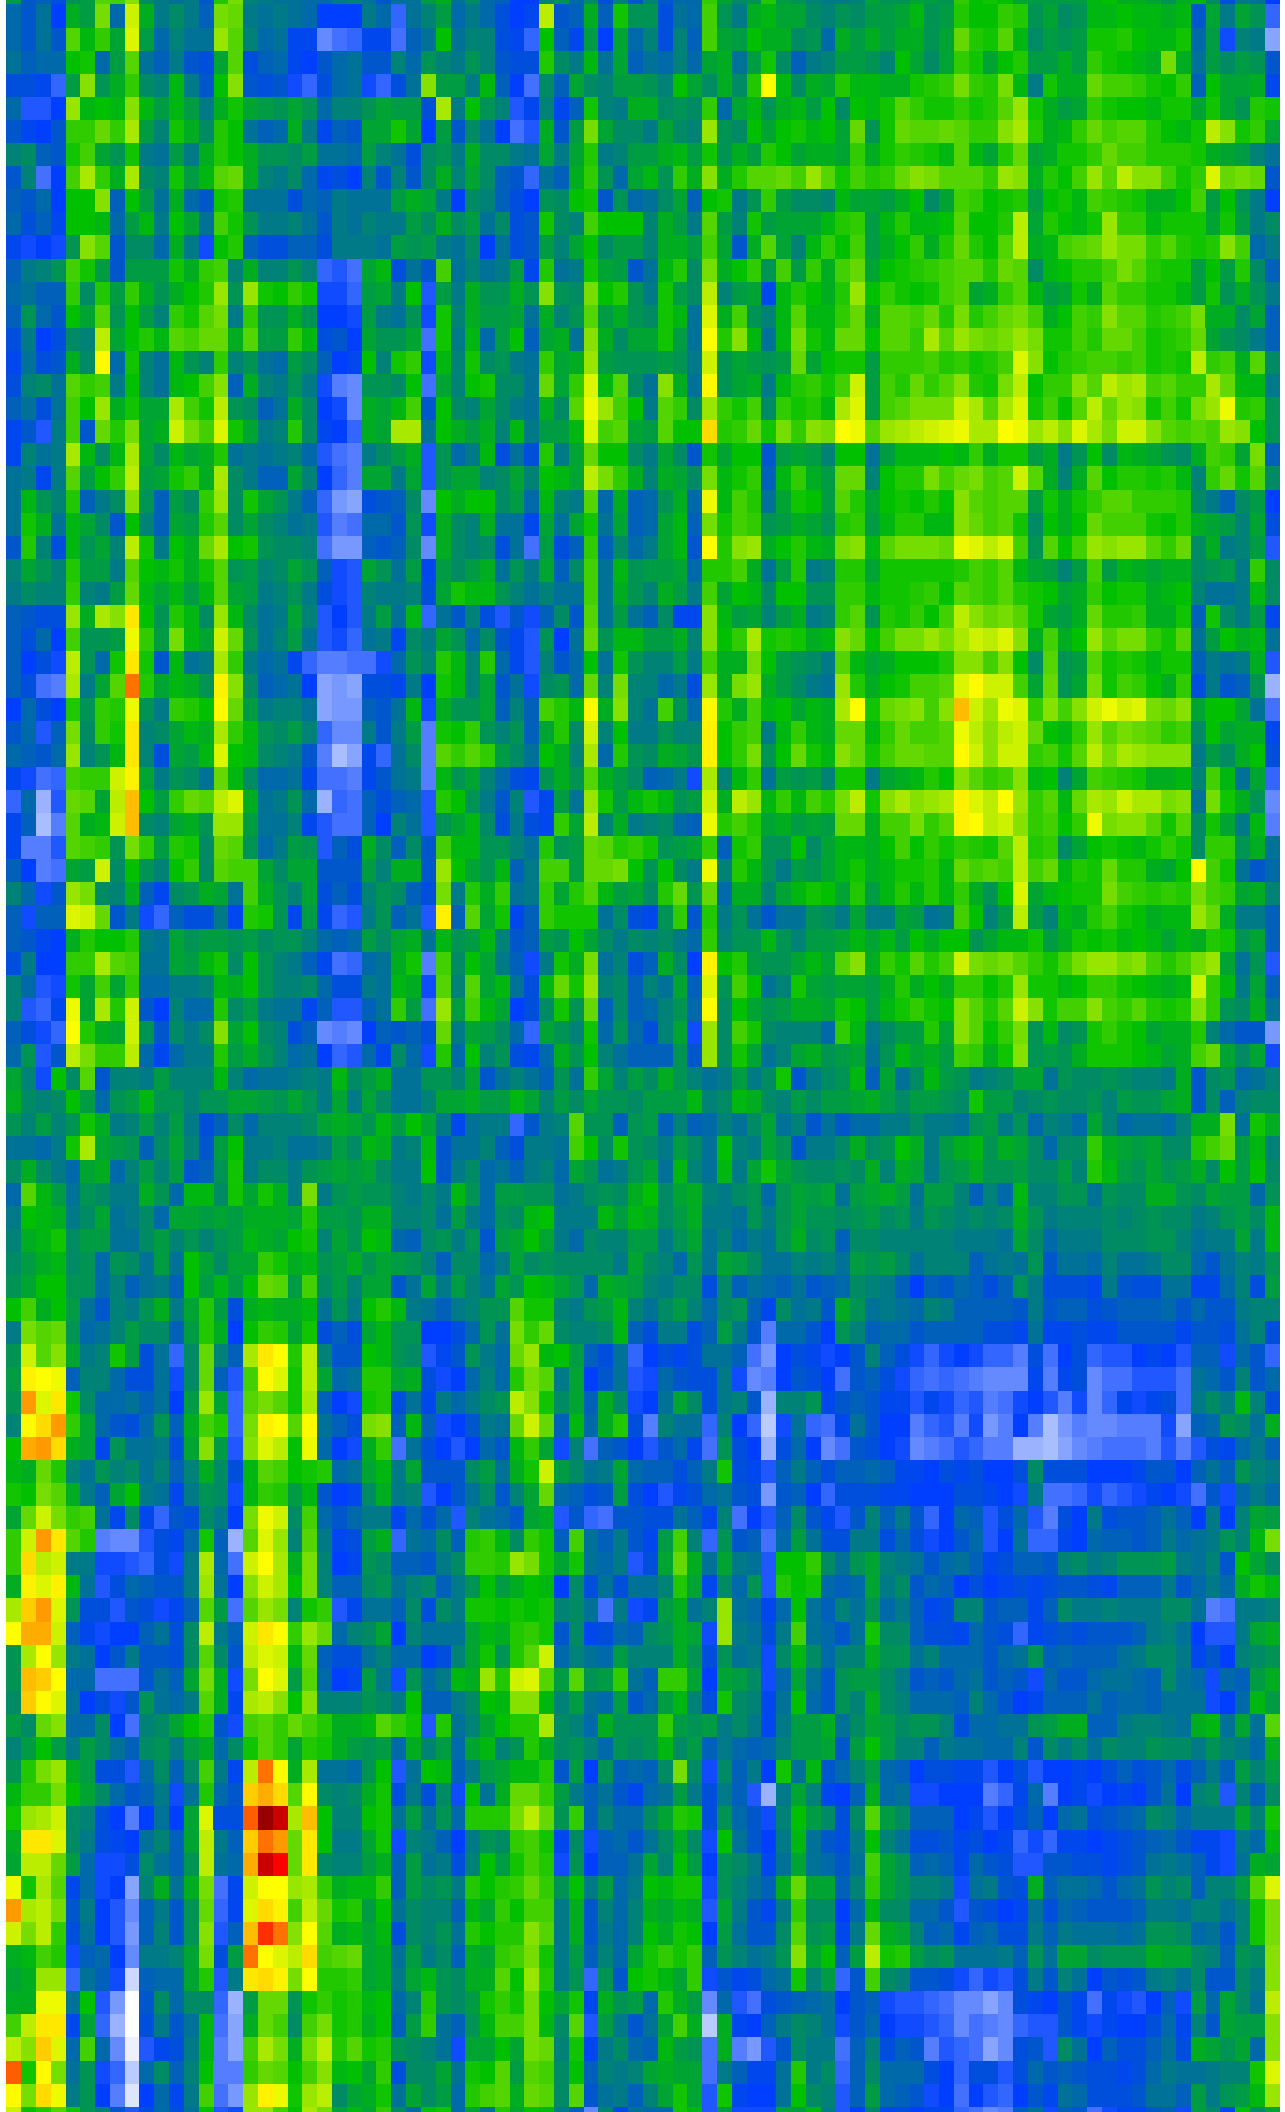

At5g64860  
At4g33460  
At1g14720  
At5g26880  
At5g08010  
At2g16400  
At5g15840  
At5g53880  
At5g41920  
At1g69440  
At5g43940  
At2g18950  
At3g05030  
At4g15440  
At1g24470  
At1g22050  
At5g59000  
At1g34470  
At3g17750  
At1g11100  
At4g26640  
At5g67180  
At1g52410  
At1g52400  
At5g45530  
At3g62510  
At2g32010  
At2g32400  
At5g48840  
At5g03420  
At2g45850  
At5g38140  
At5g38150  
At1g05070  
At5g01650  
At4g37550  
At2g36240  
At1g67080  
At2g18230  
At3g28050  
At5g58580  
At4g22190  
At5g47800  
At3g23310  
At3g21750  
At4g22570  
At5g40560  
At3g33080  
At2g11140  
At5g58390  
At5g26630  
At1g56530  
At1g20290  
At2g04730  
At4g24410  
At1g53325  
At4g33905  
At1g21790  
At1g02660  
At3g59350  
At5g19070  
At1g34260  
At5g20230  
At1g70420  
At1g73480  
At2g14750  
At5g63480  
At3g55430  
At5g63770  
At5g66850  
At2g40180  
At4g15130  
At5g48970  
At5g08200  
At2g26830  
At1g31260  
At1g74010  
At5g51260  
At2g46500  
At4g39670  
At3g01040  
At4g15120  
At4g22590  
At3g48450  
At4g20460  
At1g80460  
At1g21900  
At2g37110  
At3g08710  
At5g42010  
At3g28850

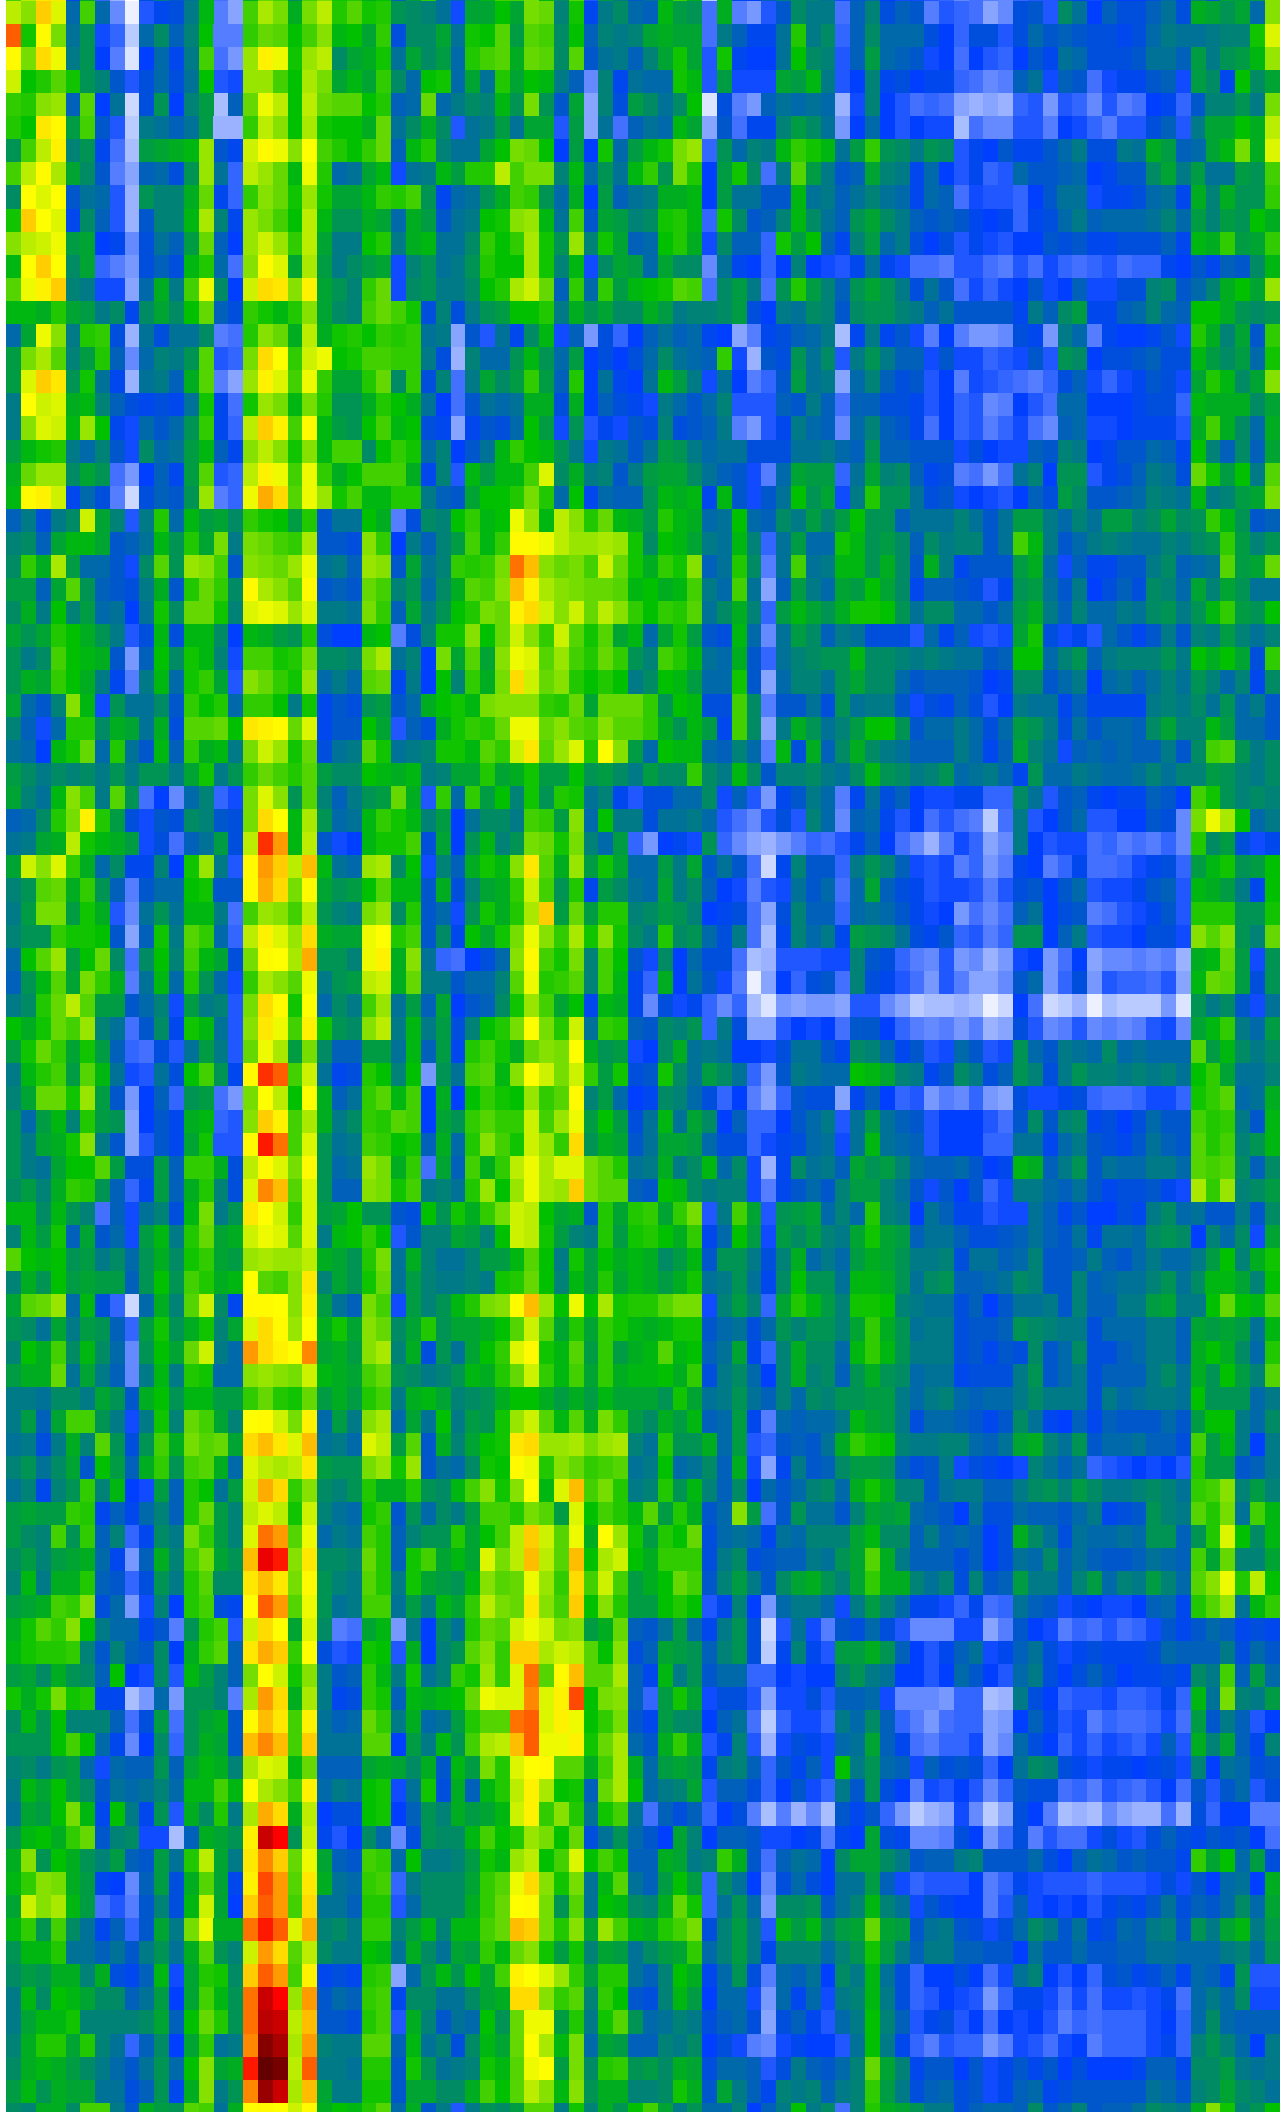

At3g08710  
At5g42010  
At3g28850  
At1g44100  
At4g02380  
At4g25900  
At5g17060  
At2g20900  
At2g36300  
At3g01640  
At2g22860  
At2g39420  
At4g12120  
At5g15190  
At3g04090  
At5g56340  
At3g57480  
At5g10750  
At3g56800  
At5g03080  
At5g49900  
At3g05580  
At5g67490  
At1g48090  
At1g24460  
At5g57610  
At1g08270  
At4g24040  
At5g45900  
At3g62580  
At1g79520  
At5g55640  
At3g62190  
At1g03070  
At2g26800  
At2g04410  
At5g58950  
At1g67530  
At4g21160  
At5g10790  
At3g14280  
At4g27470  
At1g65720  
At3g03720  
At5g38895  
At4g13980  
At1g53400  
At1g15880  
At4g21800  
At1g28960  
At1g12680  
At4g20880  
At4g10040  
At5g64400  
At1g73510  
At3g22040  
At3g55600  
At1g55410  
At2g31305  
At3g53790  
At2g30090  
At1g79900  
At1g05790  
At3g03210  
At5g64920  
At4g18050  
At2g19180  
At5g53360  
At1g03620  
At2g42780  
At1g30810  
At3g26000  
At1g03610  
At5g22000  
At3g14595  
At5g10650  
At4g17550  
At4g19960  
At4g15530  
At1g04985  
At3g06760  
At1g64610  
At3g50910  
At2g44970  
At3g08970  
At1g20630  
At1g54290  
At1g01500  
At5g12390  
At3g11850  
At3g23170  
At4g47455

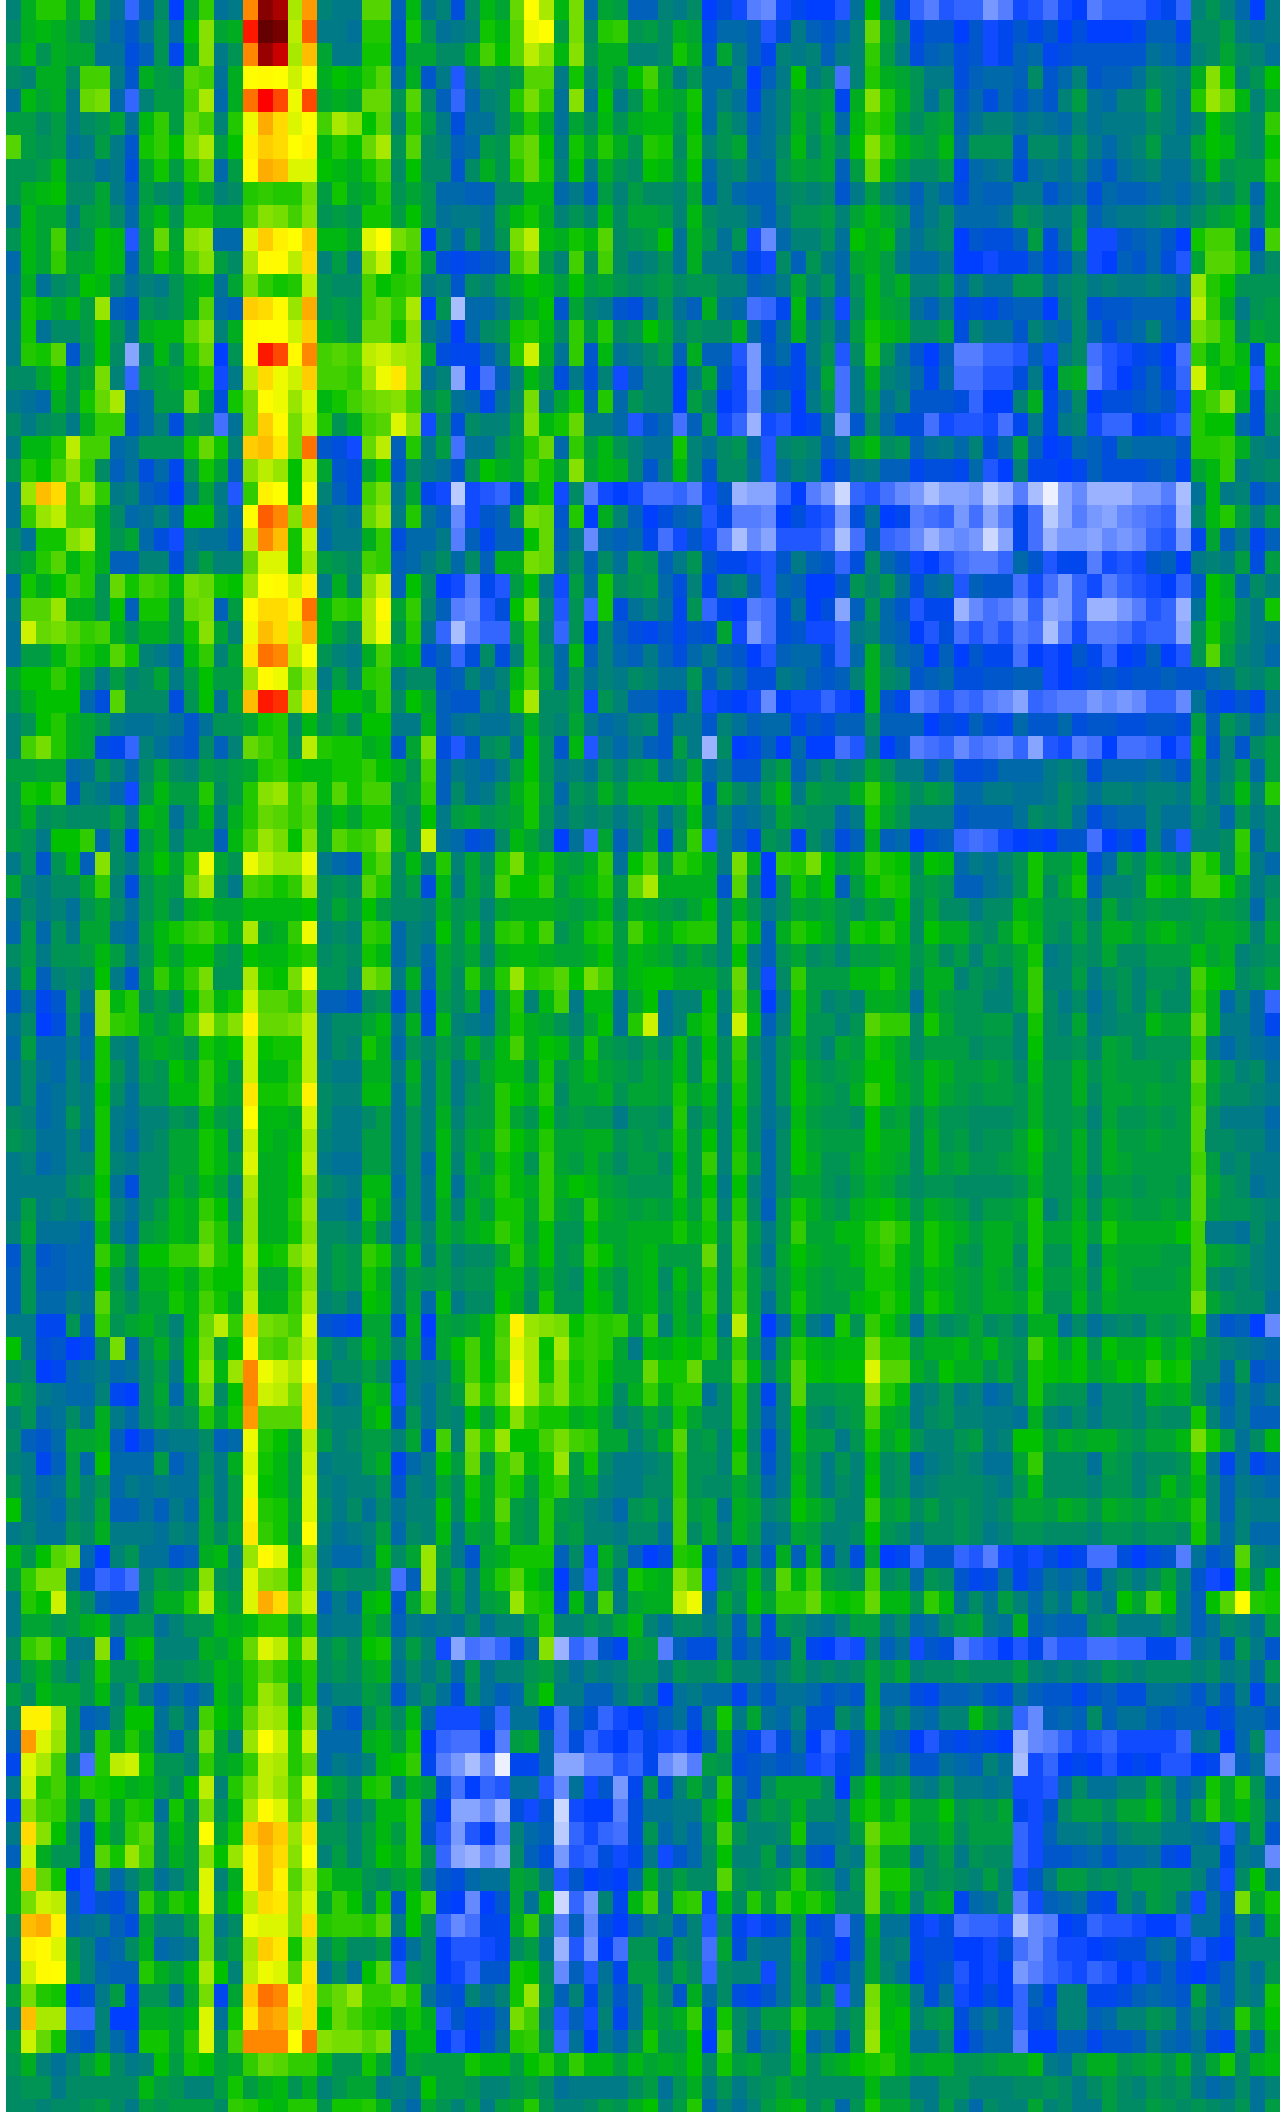

At5g12390  
At3g11850  
At3g23170  
At1g17455  
At2g46490  
At4g29450  
At1g32850  
At1g35970  
At3g29750  
At3g43950  
At1g06050  
At1g43590  
At3g61910  
At1g13900  
At3g45870  
At1g15350  
At5g49890  
At5g18650  
At2g18280  
At5g56270  
At1g73540  
At2g31800  
At5g54310  
At5g40670  
At1g30540  
At3g26590  
At1g24350  
At3g18295  
At3g49870  
At1g72760  
At3g11900  
At2g05950  
At1g71880  
At2g12940  
At1g35820  
At2g30730  
At3g17790  
At4g32500  
At2g21430  
At3g04540  
At1g23650  
At1g16950  
At5g54570  
At5g16240  
At1g32780  
At1g23250  
At1g30350  
At2g17950  
At5g59120  
At3g10890  
At1g23590  
At3g55100  
At1g23520  
At2g42180  
At1g06250  
At1g23670  
At1g23600  
At2g45600  
At1g79360  
At3g53370  
At1g12600  
At4g25040  
At2g30080  
At5g08480  
At4g34510  
At1g13130  
At4g11760  
At1g51350  
At5g13490  
At2g02810  
At5g36190  
At4g19120  
At1g34575  
At2g05450  
At1g22650  
At5g60860  
At3g61580  
At4g24730  
At1g70490  
At1g27700  
At1g64980  
At1g47380  
At2g46170  
At4g20780  
At1g11890  
At3g60540  
At3g16350  
At2g38360  
At5g41730  
At2g18830  
At4g30540  
At2g07740

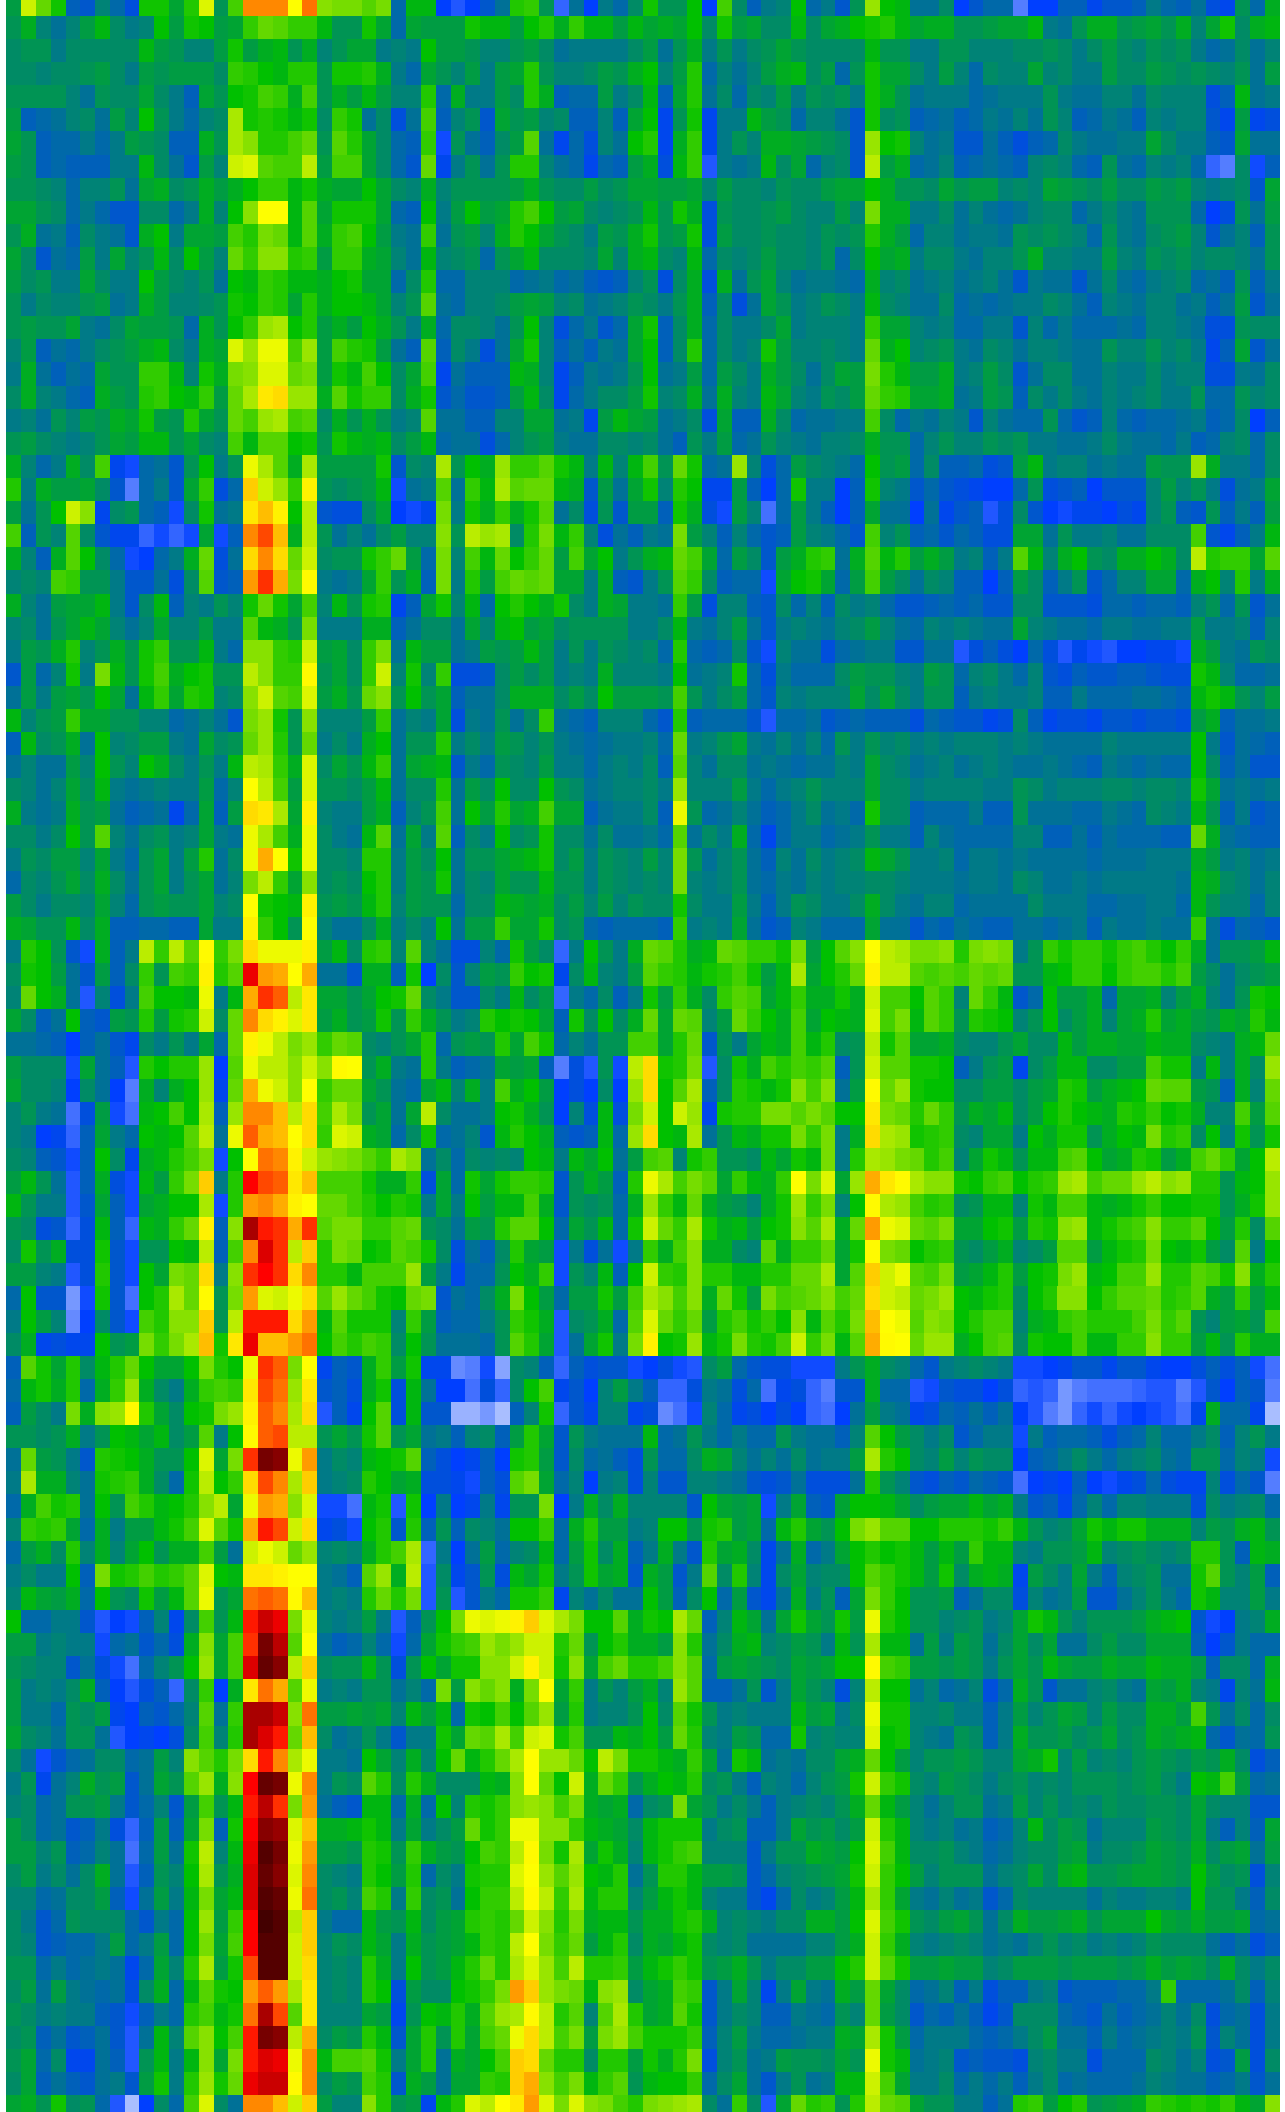

At5g41730  
At2g18830  
At4g30540  
At2g07740  
At2g19420  
At1g32670  
At1g59535  
At4g17930  
At4g18500  
At1g67670  
At4g03153  
At1g23320  
At3g52830  
At2g11190  
At5g55680  
At3g45950  
At2g06220  
At3g19690  
At5g48280  
At1g47360  
At1g75290  
At3g58750  
At5g03905  
At5g61960  
At2g28320  
At3g51250  
At4g18350  
At3g57510  
At1g51210  
At1g29230  
At2g40680  
At5g50800  
At5g38130  
At2g22340  
At4g25010  
At5g61710  
At5g49130  
At4g14810  
At5g37170  
At2g15340  
At4g12410  
At3g59570  
At3g59570  
At5g15470  
At5g22030  
At1g43710  
At5g05370  
At5g40650  
At1g61770  
At1g23750  
At3g59680  
At3g20040  
At2g38840  
At2g43040  
At2g19880  
At1g69330  
At2g20840  
At1g29310  
At3g50110  
At2g03980  
At5g02180  
At3g06483  
At2g09910  
At3g54690  
At2g34770  
At1g26130  
At1g29750  
At3g07940  
At4g30940  
At4g27840  
At5g10950  
At2g40090  
At1g22200  
At3g62480  
At2g20440  
At1g14560  
At1g74320  
At1g10660  
At1g47270  
At5g65530  
At2g46260  
At4g27880  
At4g39870  
At4g24630  
At5g17400  
At3g02555  
At5g55490  
At3g50310  
At3g57140  
At2g37670  
At3g05140  
At3g05670

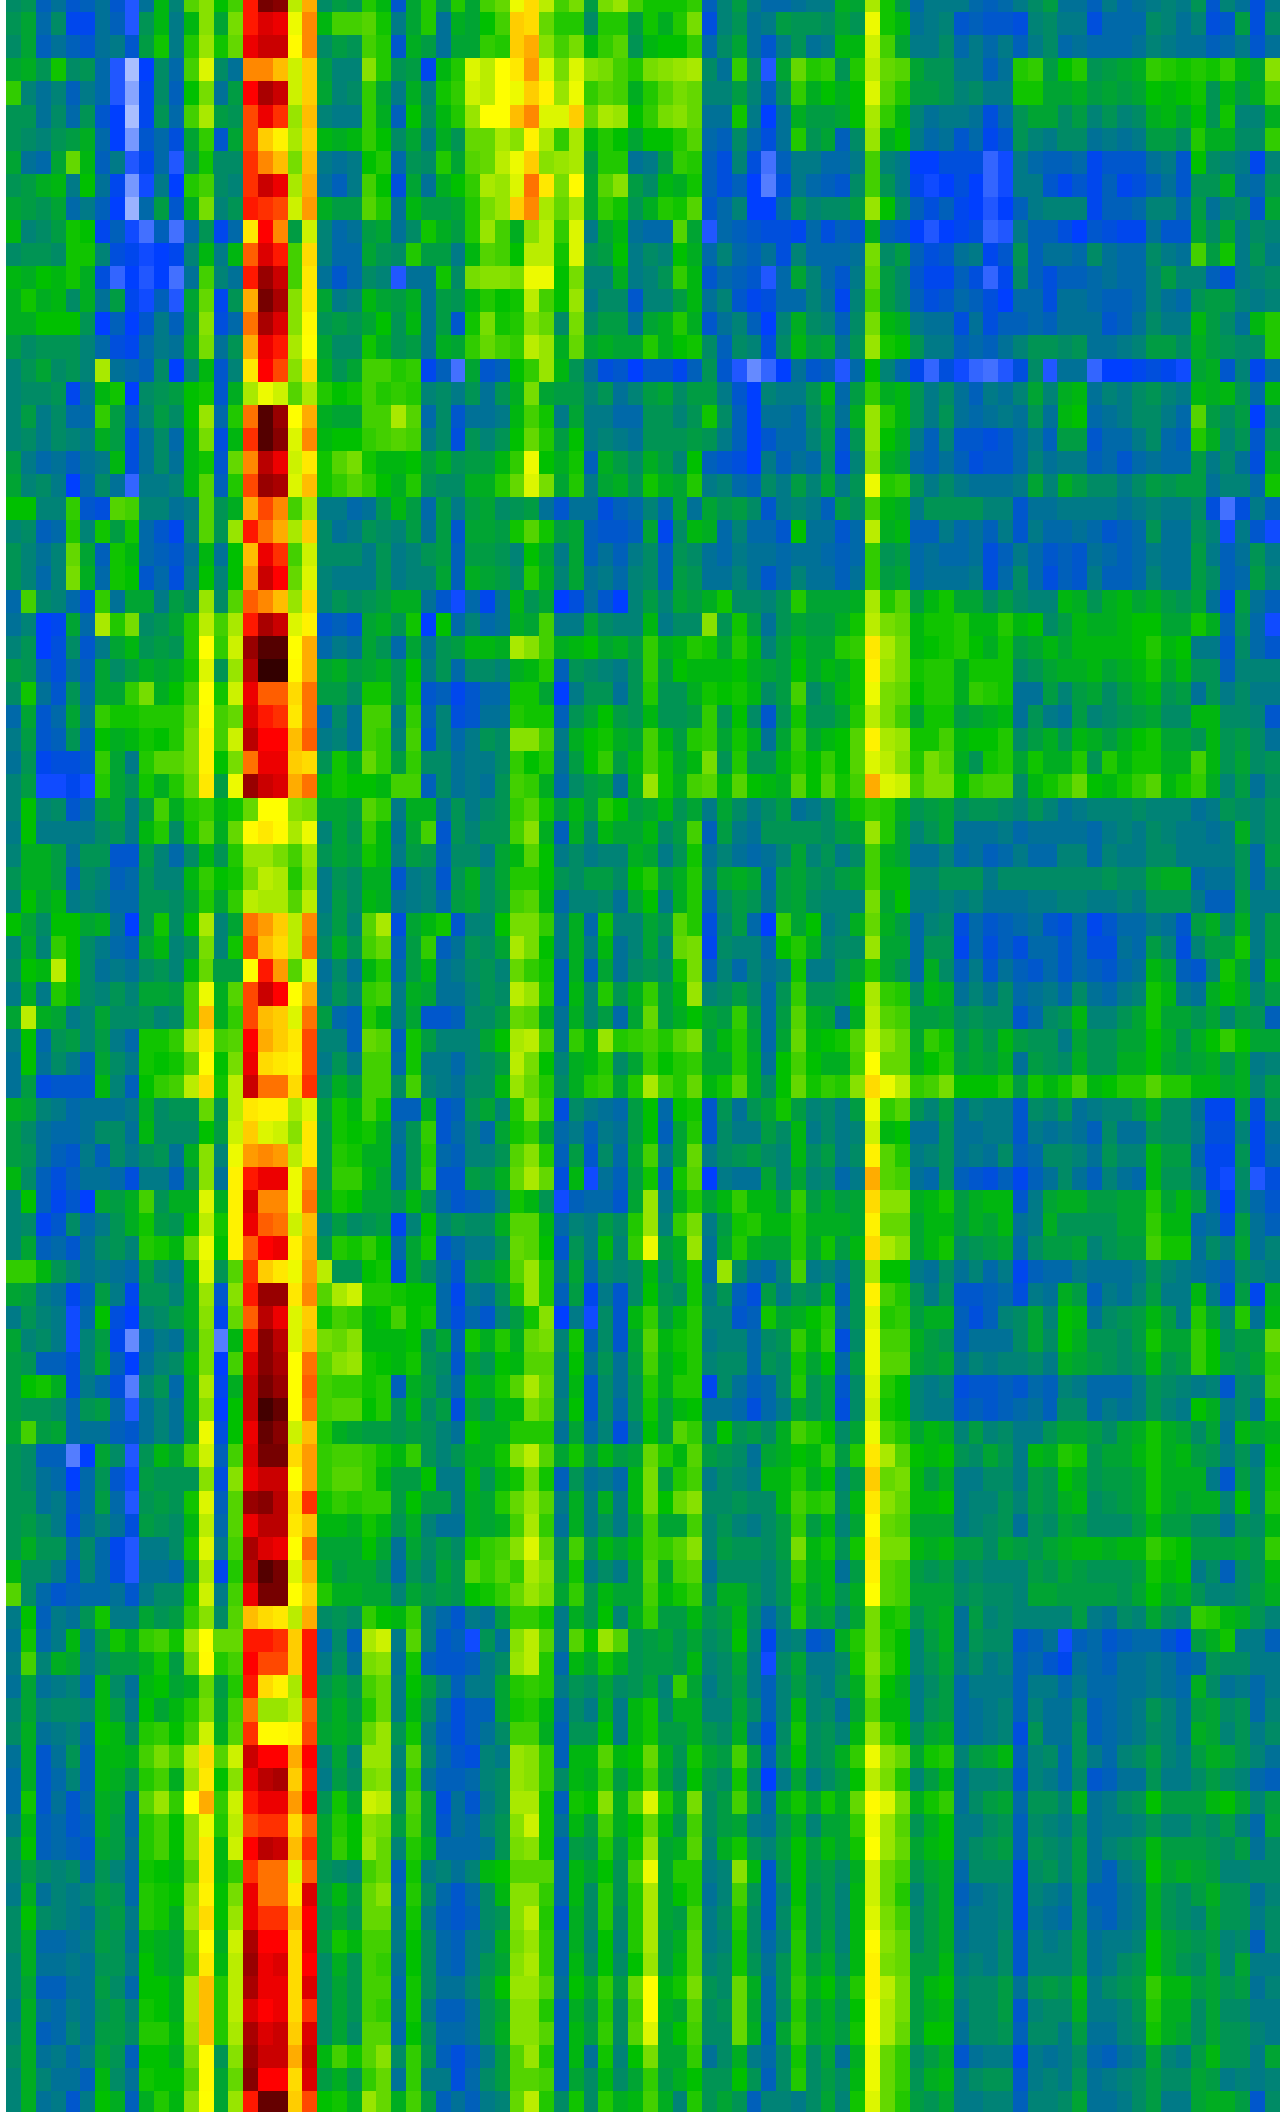

At3g07140  
At2g37670  
At3g05140  
At3g05670  
At5g04460  
At1g15920  
At1g03550  
At5g24870  
At1g53320  
At5g10740  
At4g18700  
At1g54920  
At1g65430  
At4g20380  
At5g58380  
At1g08020  
At3g62660  
At3g05150  
At2g21540  
At3g11690  
At1g67480  
At1g05960  
At3g08730  
At2g42380  
At5g54120  
At5g54130  
At1g53500  
At3g51150  
At3g18750  
At2g45310  
At1g05630  
At4g15200  
At4g02900  
At4g27980  
At3g12110  
At3g11380  
At1g54923  
At1g52950  
At3g12840  
At5g28950  
At4g18990  
At5g24655  
At1g09080  
At1g09180  
At5g23130  
At1g07220  
At2g32670  
At3g05720  
At3g43150  
At2g13680  
At5g52000  
At4g36070  
At3g51470  
At2g42080  
At3g13820  
At1g51915  
At2g29620  
At4g20890  
At5g57830  
At4g18640  
At2g37980  
At5g01610  
At3g24530  
At2g40620  
At5g42880  
At5g27000  
At4g11050  
At2g17530  
At1g74490  
At4g33440  
At1g19940  
At1g18750  
At1g24330  
At5g24940  
At4g15250  
At1g04090  
At3g58160  
At3g13900  
At3g01015  
At4g31260  
At3g06560  
At2g41440  
At2g29040  
At1g68630  
At5g57200  
At1g16290  
At1g04880  
At5g15100  
At1g79640  
At5g21050  
At1g22460  
At5g16480

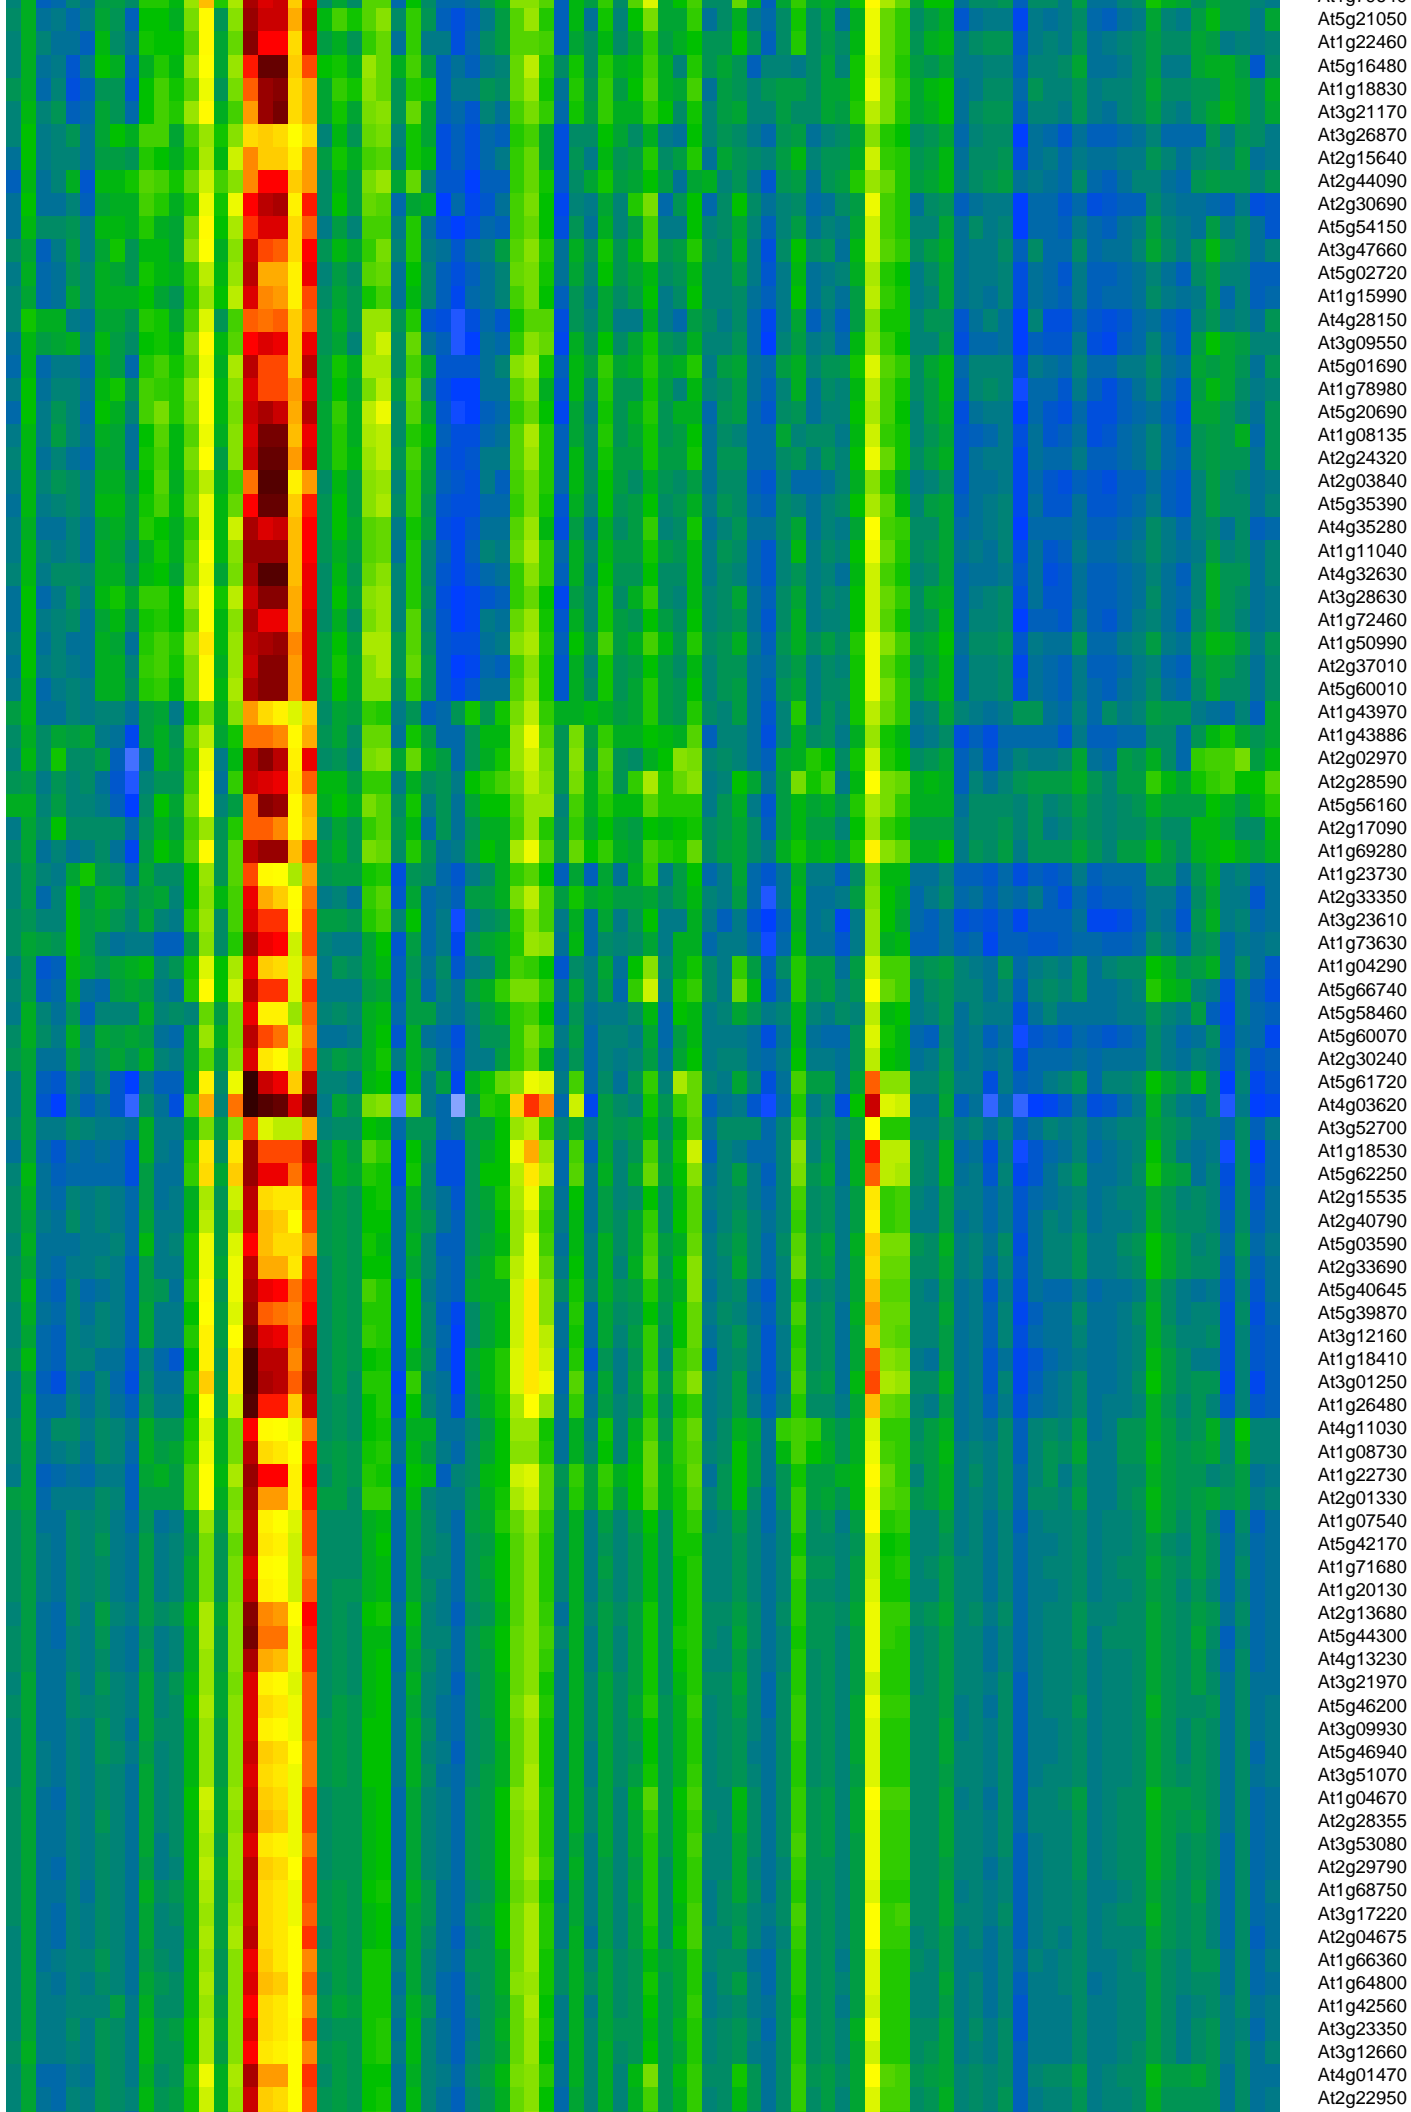



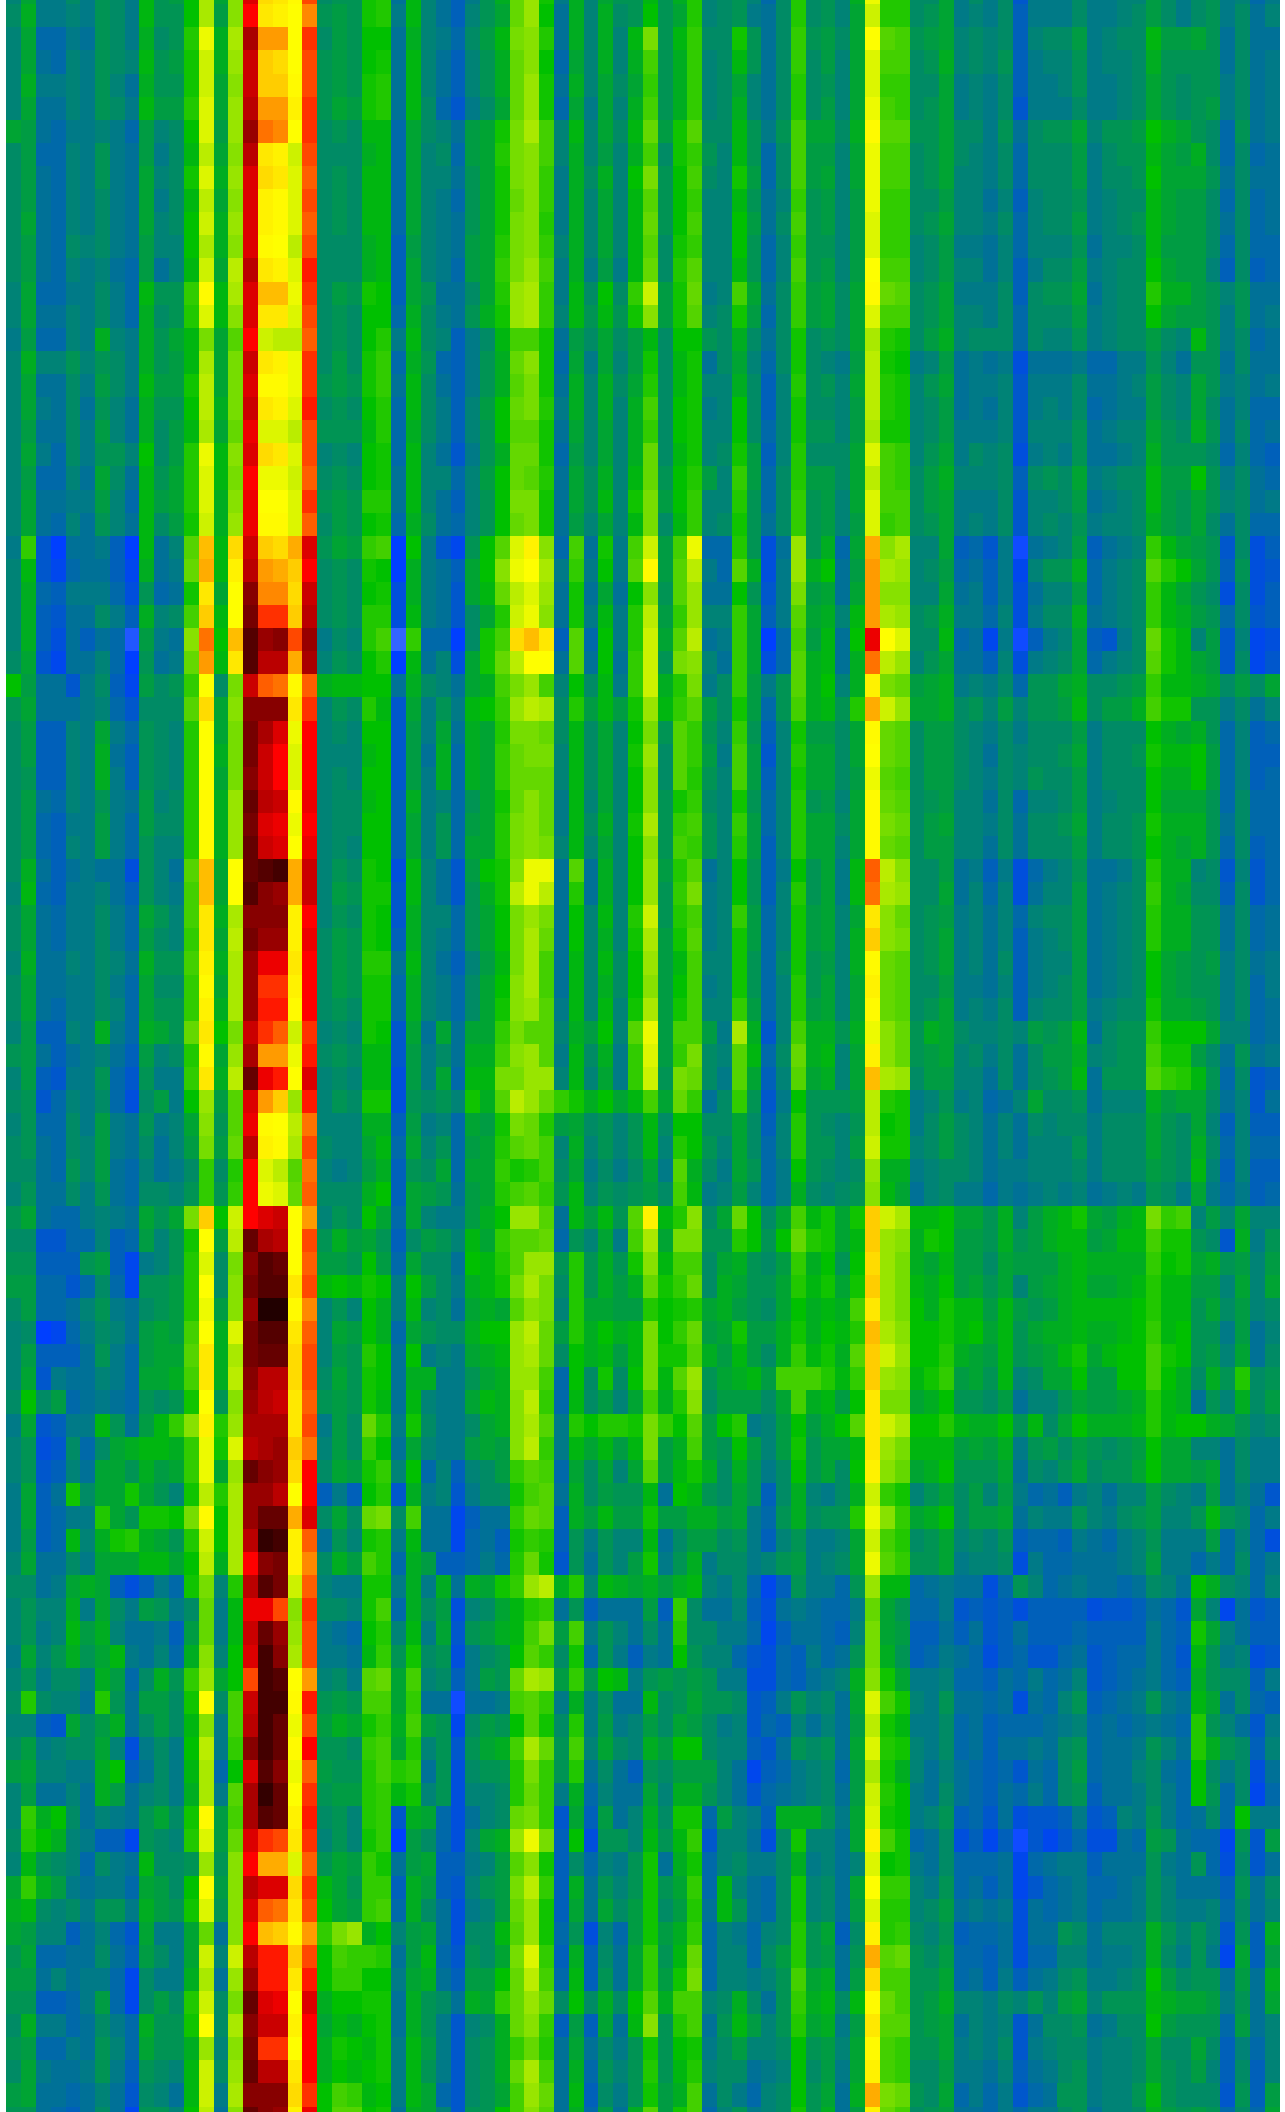

At3g12660  
At4g01470  
At2g22950  
At1g57550  
At5g14670  
At3g04620  
At1g80660  
At2g07560  
At3g08560  
At4g02140  
At1g07850  
At1g72960  
At1g20080  
At3g17630  
At5g25550  
At1g26320  
At3g19090  
At3g29070  
At3g05960  
At2g30290  
At1g50310  
At4g10440  
At2g32890  
At4g25950  
At5g52340  
At1g58210  
At5g17480  
At1g63060  
At5g38760  
At1g07410  
At1g54240  
At5g45880  
At1g02790  
At3g13400  
At4g13560  
At3g28790  
At3g28980  
At5g35090  
At4g25590  
At3g47440  
At5g52360  
At1g62450  
At1g22130  
At5g09550  
At3g57690  
At2g20470  
At3g28830  
At5g20810  
At5g62850  
At3g28840  
At3g28780  
At5g39310  
At1g70430  
At1g15470  
At4g34750  
At5g61980  
At4g25150  
At4g37280  
At2g36660  
At5g50930  
At5g02430  
At3g44070  
At2g43900  
At3g12690  
At2g19400  
At3g16380  
At5g16540  
At1g74220  
At2g39890  
At4g38190  
At4g16745  
At1g64740  
At3g09760  
At1g12450  
At5g47620  
At3g61160  
At5g56750  
At4g25780  
At1g65240  
At1g11610  
At4g12860  
At4g40020  
At1g04500  
At2g22290  
At1g12140  
At5g13150  
At4g24580  
At5g10260  
At1g79250  
At5g36260  
At2g28440

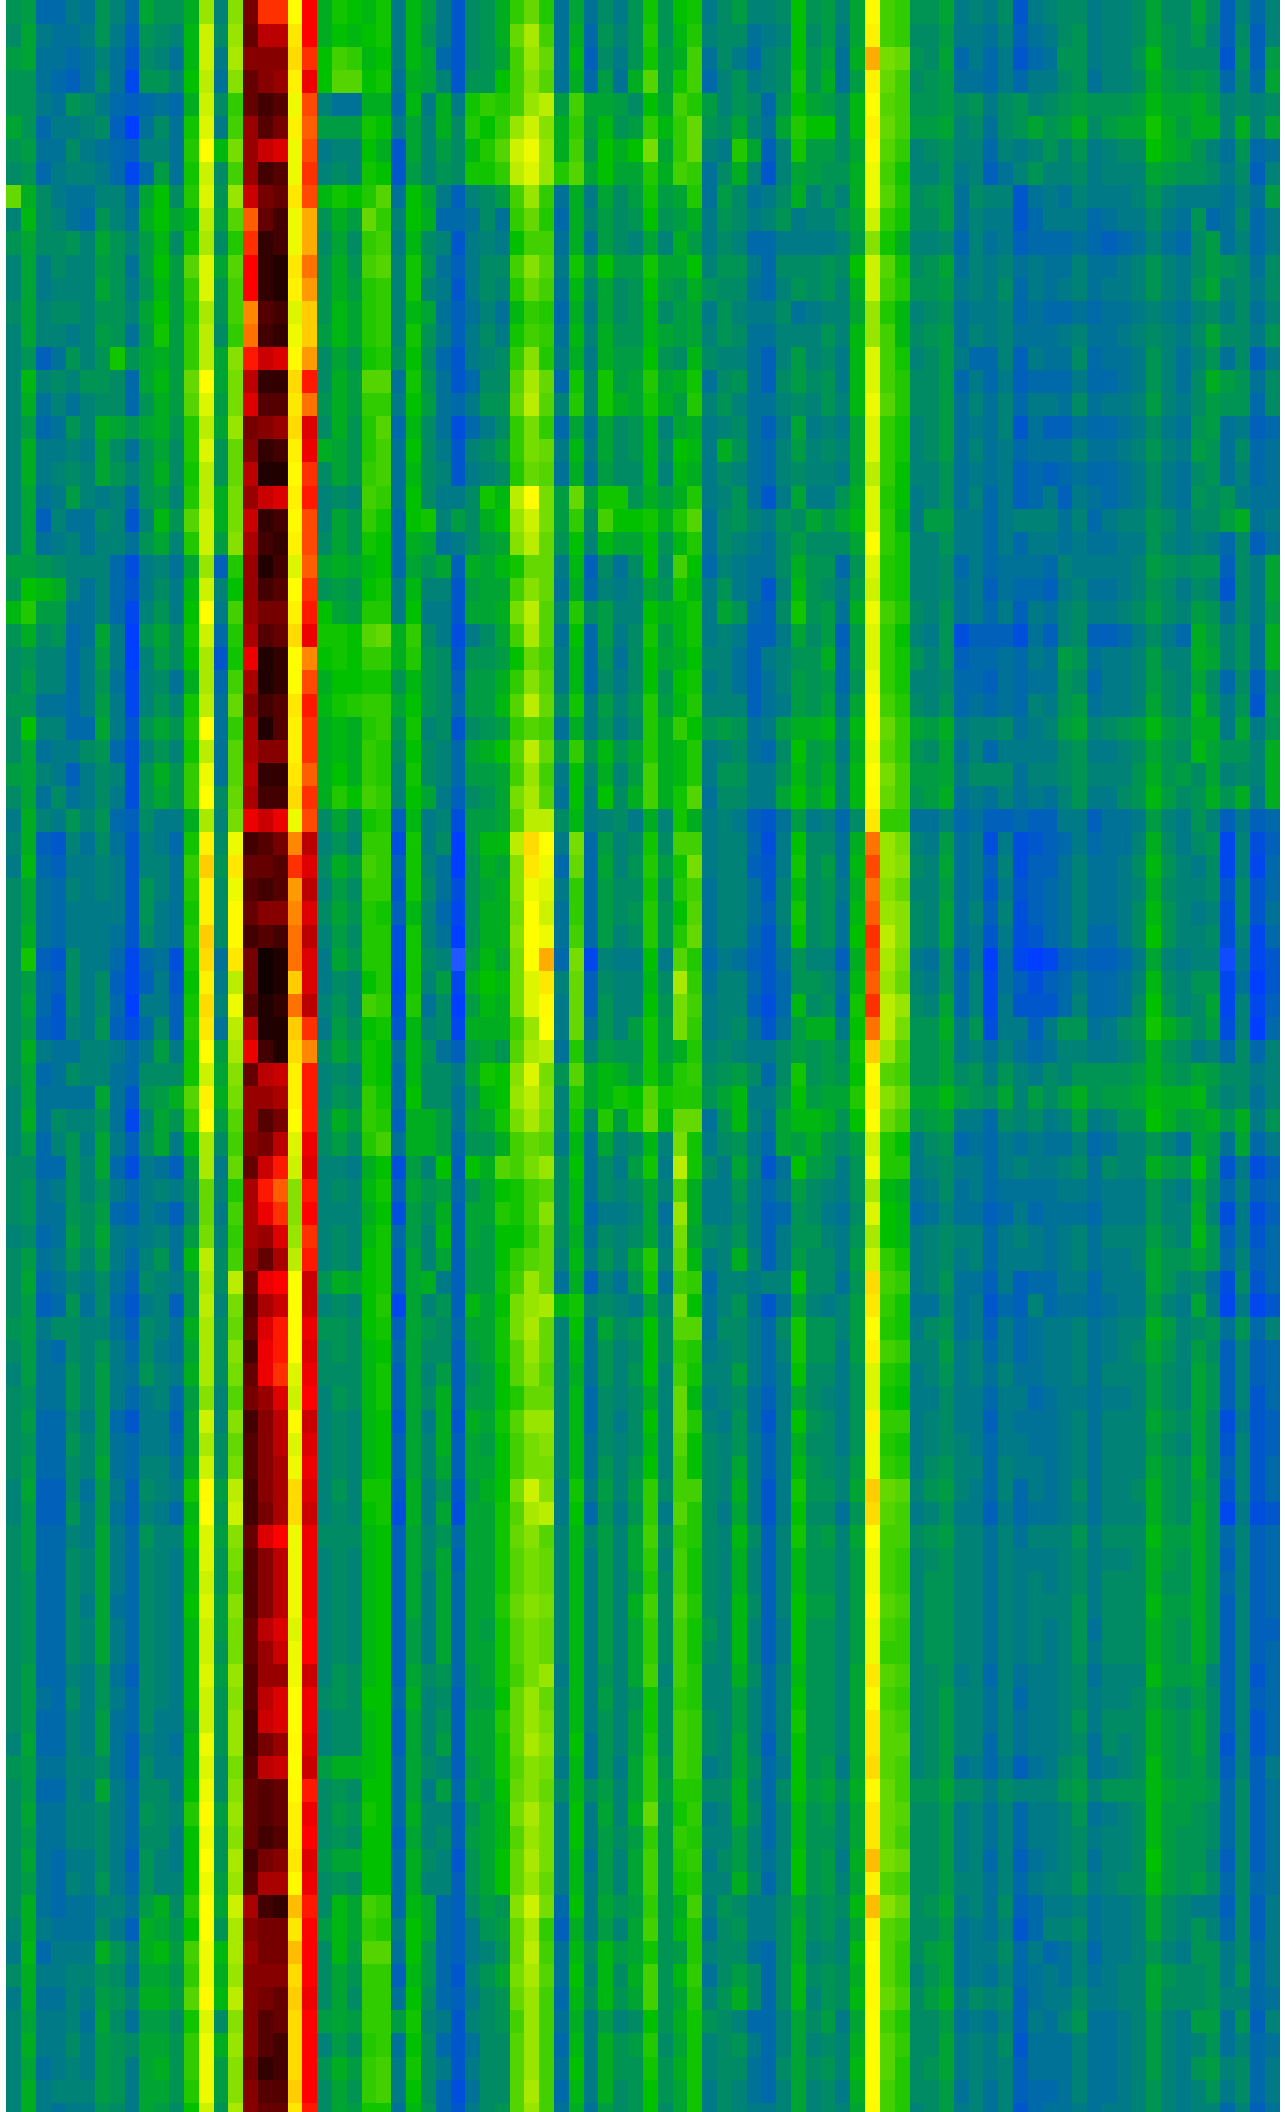

At1g79250  
At5g36260  
At2g28440  
At5g13990  
At1g64630  
At4g17483  
At2g03060  
At3g57390  
At4g24170  
At2g19040  
At5g55980  
At5g25430  
At4g02650  
At1g24110  
At2g19050  
At2g03630  
At5g61360  
At4g26930  
At4g13450  
At4g15980  
At3g18810  
At2g41210  
At2g32460  
At3g28150  
At5g54780  
At3g59290  
At3g55050  
At5g01700  
At1g44160  
At3g52460  
At1g01780  
At4g01575  
At1g03920  
At1g69050  
At1g73860  
At4g31230  
At3g26860  
At5g62750  
At4g15650  
At1g28550  
At1g13890  
At3g02810  
At1g01310  
At5g54095  
At5g40155  
At1g10680  
At3g56960  
At2g14490  
At5g24240  
At2g21480  
At1g28270  
At4g28000  
At5g10090  
At4g00350  
At2g25600  
At5g10500  
At3g60780  
At2g48150  
At5g07420  
At3g13390  
At5g27870  
At3g01700  
At5g07430  
At3g28750  
At3g01240  
At3g07820  
At3g62170  
At3g20865  
At5g14380  
At2g47050  
At5g19580  
At3g01270  
At3g46520  
At1g29140  
At1g55570  
At4g35010  
At1g63930  
At3g51300  
At3g45280  
At3g62180  
At2g46860  
At2g19770  
At1g64320  
At5g10660  
At4g34940  
At1g04600  
At5g57320  
At3g24720  
At4g34440  
At5g16100  
At5g60740  
At1g27220

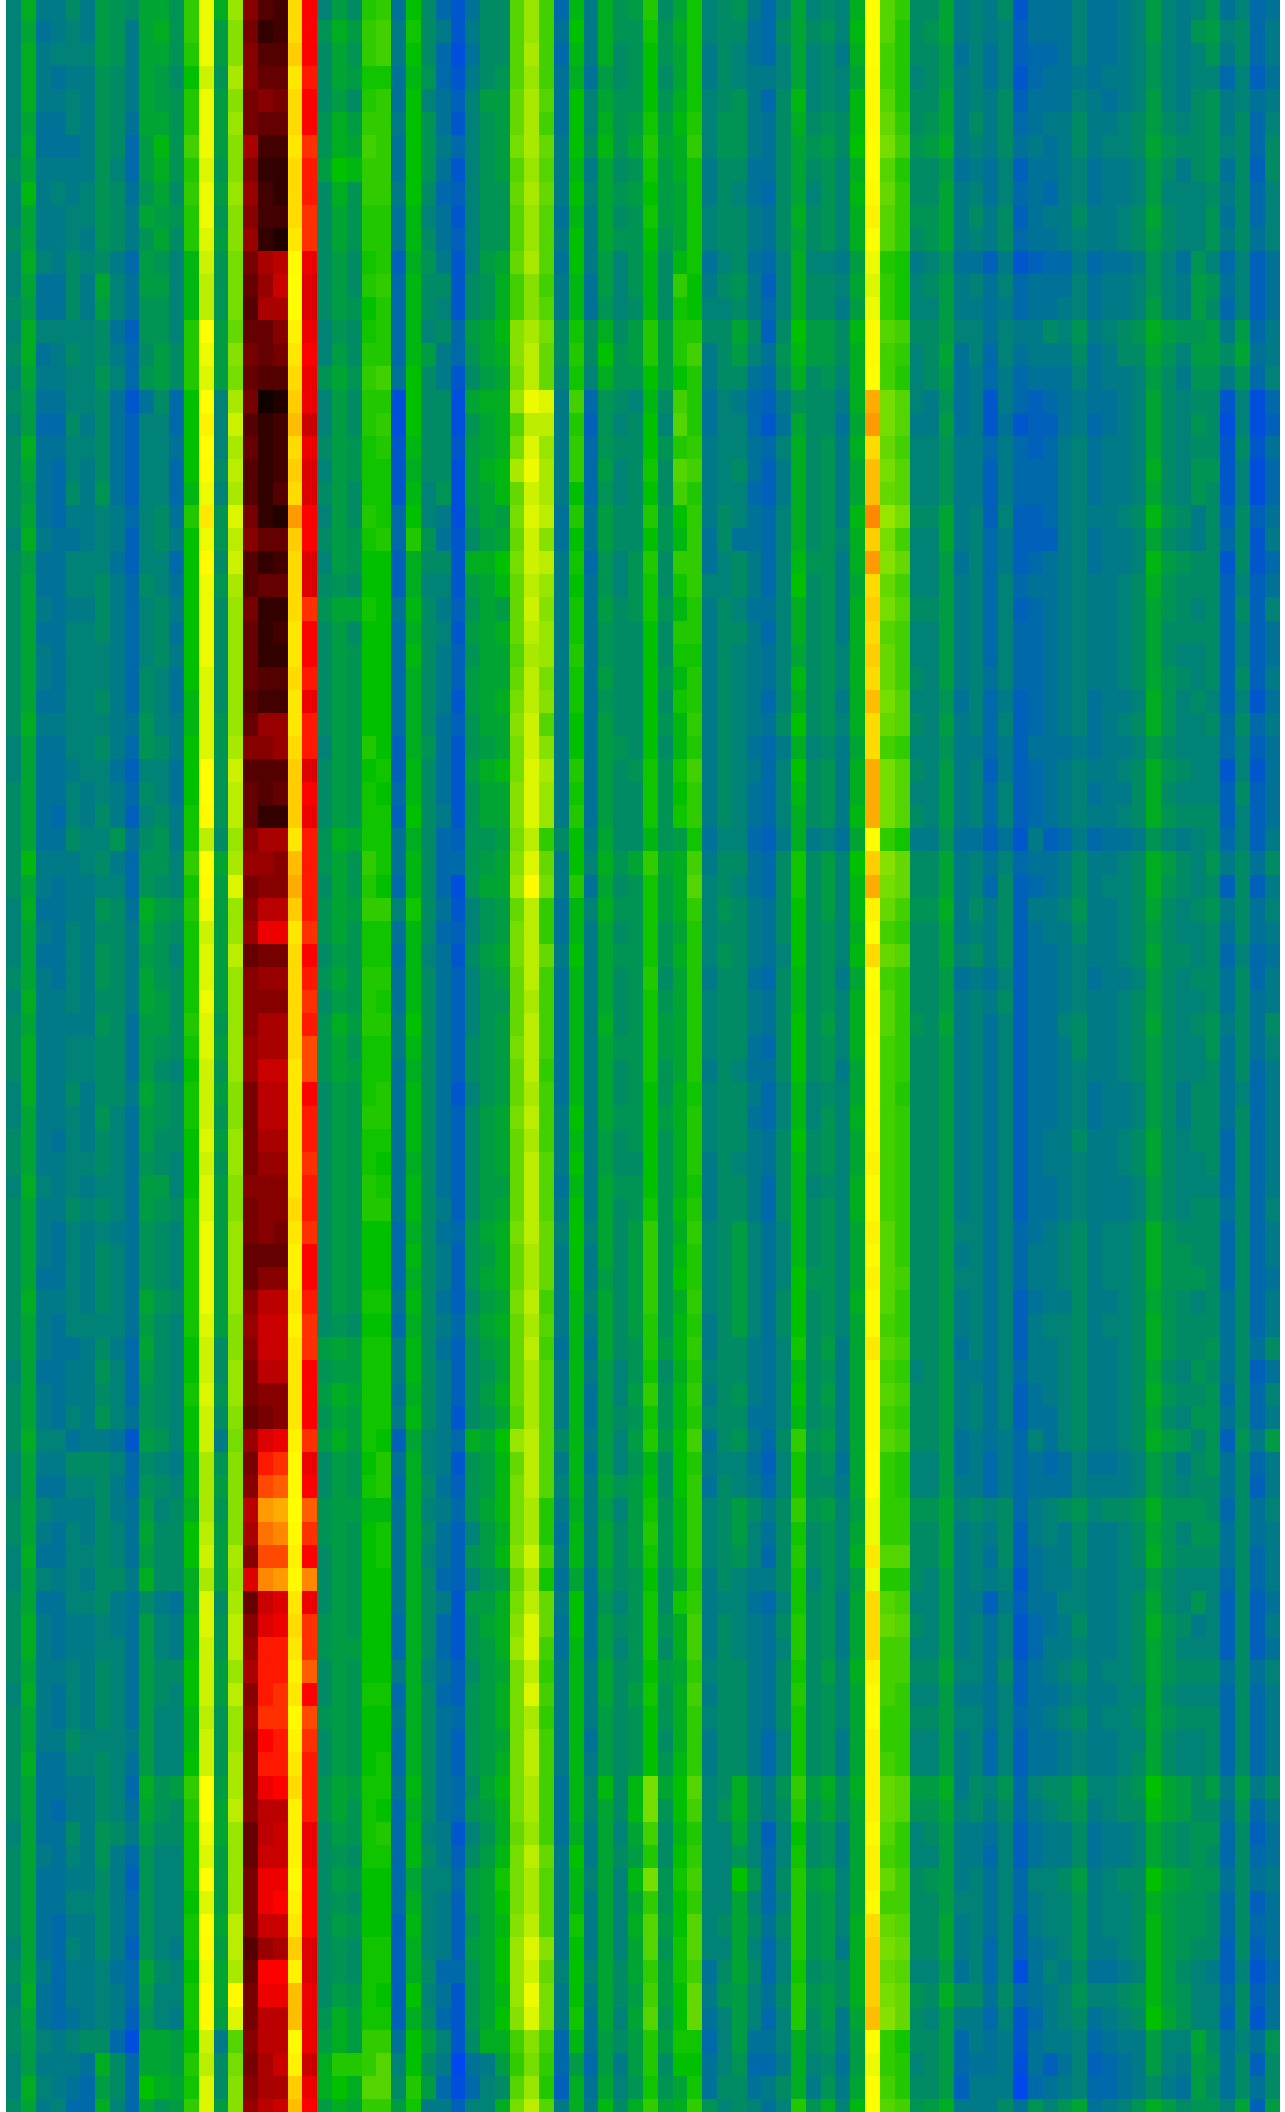

At4g34440  
At5g16100  
At5g60740  
At1g07330  
At2g19010  
At4g27110  
At2g04220  
At4g20160  
At2g34440  
At3g11740  
At1g44120  
At1g79400  
At1g67290  
At1g79910  
At1g64300  
At1g54280  
At4g18790  
At4g04980  
At5g41780  
At1g04470  
At1g47280  
At3g05610  
At1g60240  
At5g41310  
At3g18220  
At5g26060  
At1g52240  
At1g35490  
At3g42880  
At1g70540  
At3g24620  
At4g31230  
At3g28490  
At3g52080  
At2g33870  
At3g04690  
At5g04390  
At4g28670  
At4g33390  
At4g30770  
At3g46750  
At1g16760  
At4g13240  
At1g43630  
At1g51260  
At3g26880  
At1g11250  
At4g17690  
At2g45610  
At3g10460  
At2g10970  
At5g48270  
At5g47470  
At1g19890  
At5g59370  
At3g03430  
At1g77980  
At1g51410  
At5g64690  
At1g12070  
At3g21180  
At3g61230  
At1g77730  
At5g37060  
At2g18080  
At5g25880  
At2g33670  
At5g19610  
At1g67540  
At4g21420  
At1g16380  
At1g68090  
At3g07840  
At3g23270  
At3g07830  
At3g28770  
At3g22650  
At1g16360  
At5g02570  
At5g51030  
At5g39650  
At4g29340  
At2g13570  
At1g52680  
At3g52620  
At2g17180  
At1g19780  
At1g06750  
At2g38910  
At1g75160  
At3g10470  
At3g10540

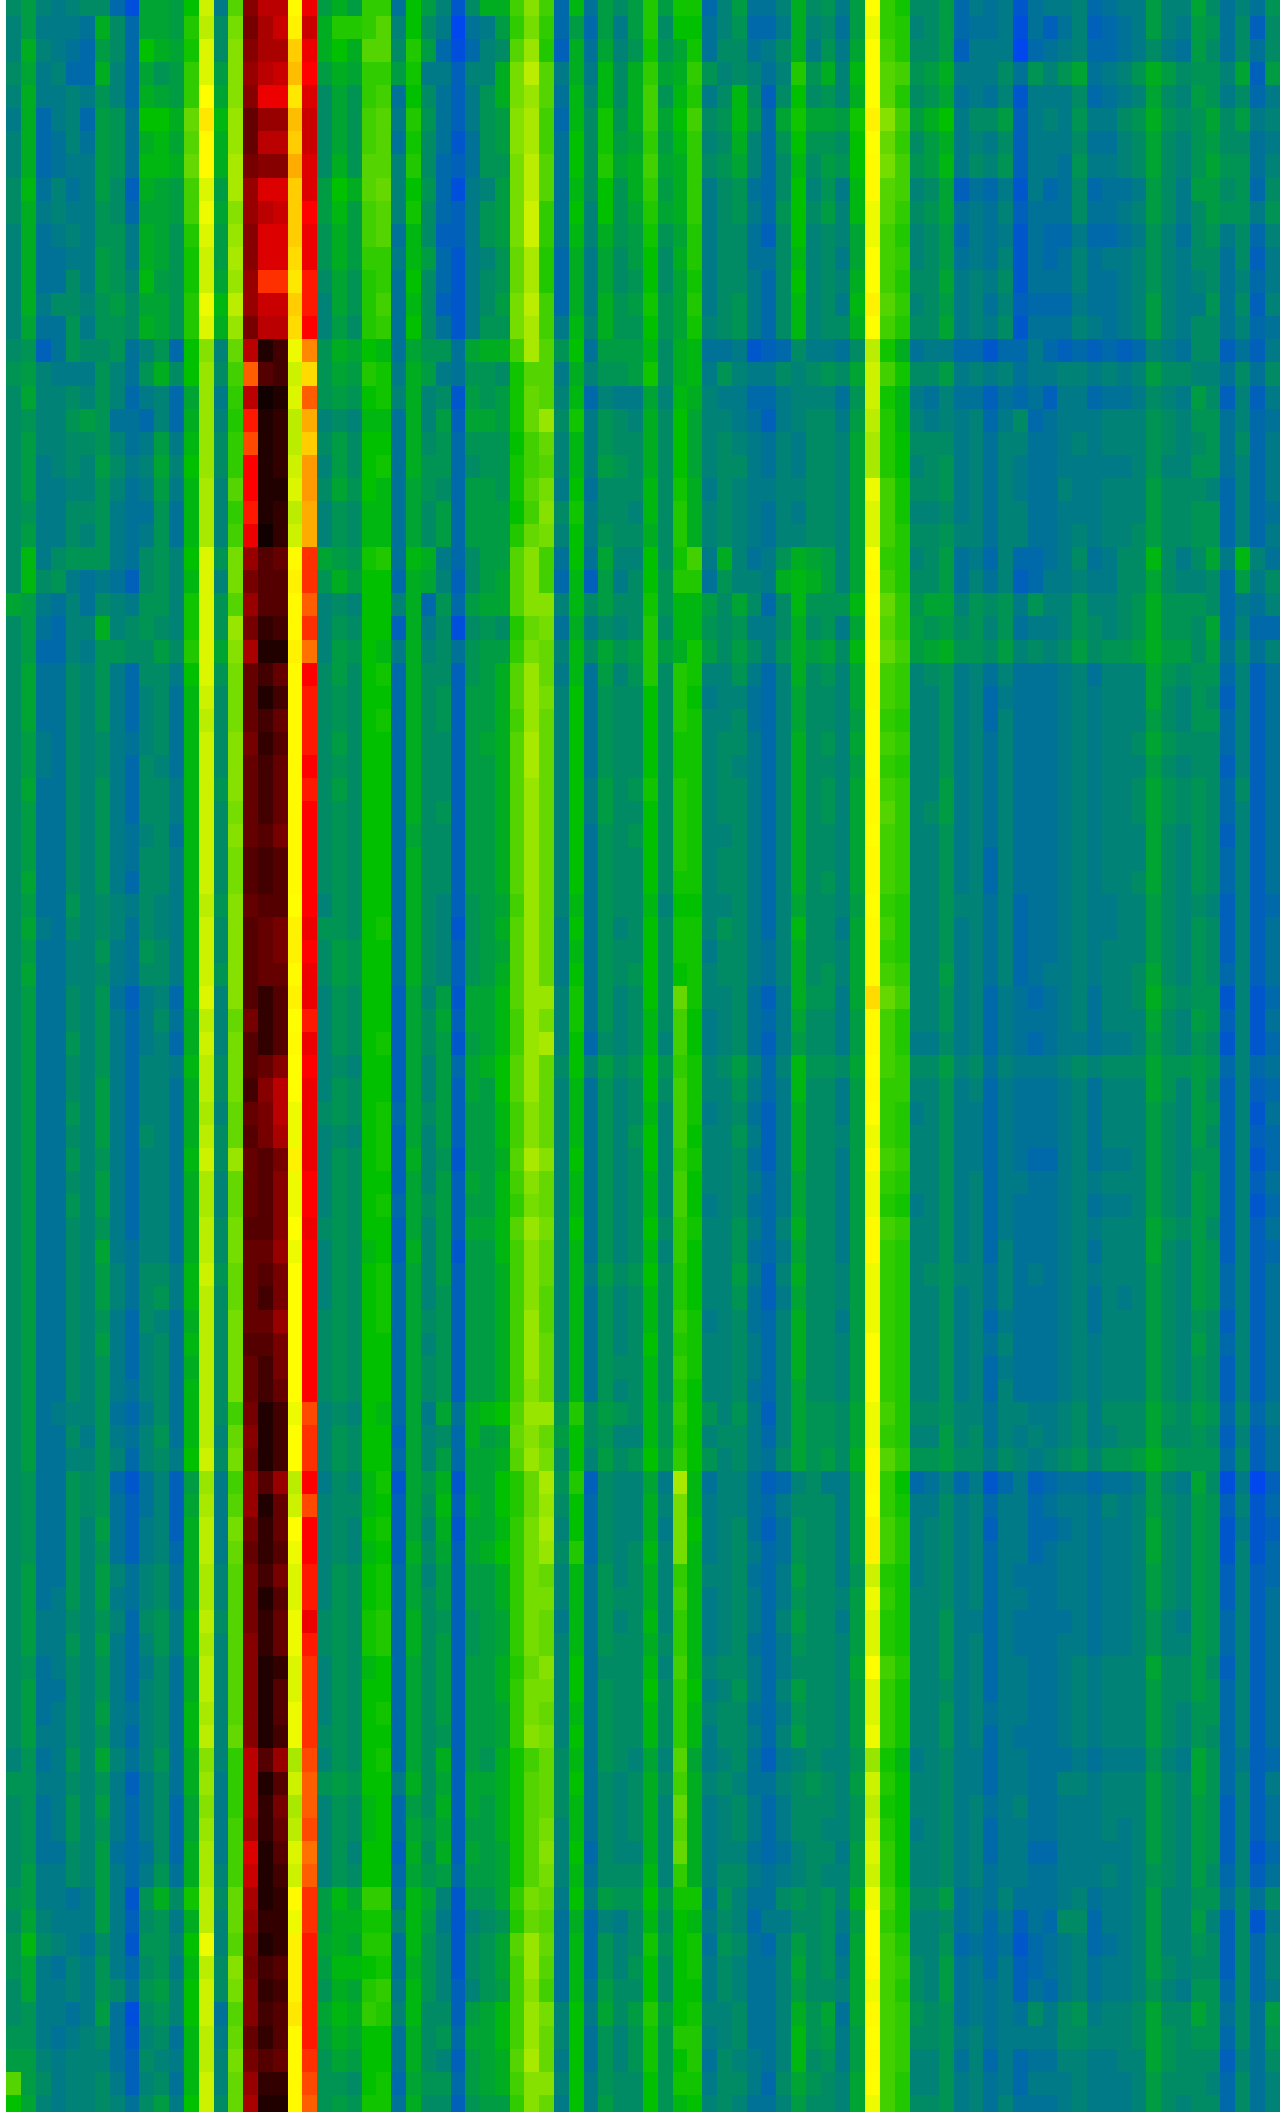

At2g38910  
At1g75160  
At3g10470  
At3g10540  
At3g03080  
At5g14870  
At2g19340  
At2g31830  
At3g48010  
At5g25530  
At5g61700  
At2g20430  
At3g55190  
At3g45810  
At3g02440  
At5g47540  
At1g67623  
At1g02000  
At4g39180  
At5g20390  
At2g28180  
At2g44560  
At1g30710  
At2g05850  
At5g20410  
At1g74000  
At4g12430  
At4g05330  
At3g20200  
At4g04930  
At2g31500  
At3g25165  
At2g45790  
At5g58050  
At5g50830  
At2g24450  
At5g48140  
At2g36020  
At5g15110  
At3g13065  
At5g64790  
At5g14890  
At2g19000  
At1g55560  
At3g25170  
At1g03050  
At3g42640  
At4g02250  
At3g52600  
At1g10770  
At5g39880  
At3g26110  
At2g16730  
At5g47000  
At3g62230  
At5g50030  
At1g24520  
At2g02140  
At5g26710  
At3g05930  
At3g20230  
At1g70790  
At2g46210  
At4g26260  
At2g46300  
At3g17060  
At4g03290  
At2g07040  
At5g04180  
At2g23900  
At1g68610  
At3g43860  
At3g09530  
At2g27180  
At4g24640  
At1g49290  
At5g39400  
At1g61860  
At1g23350  
At1g58120  
At1g01980  
At5g12180  
At4g33230  
At2g38500  
At5g09430  
At1g79860  
At2g33460  
At4g38230  
At1g13970  
At5g45810  
At1g61290  
At2g18180

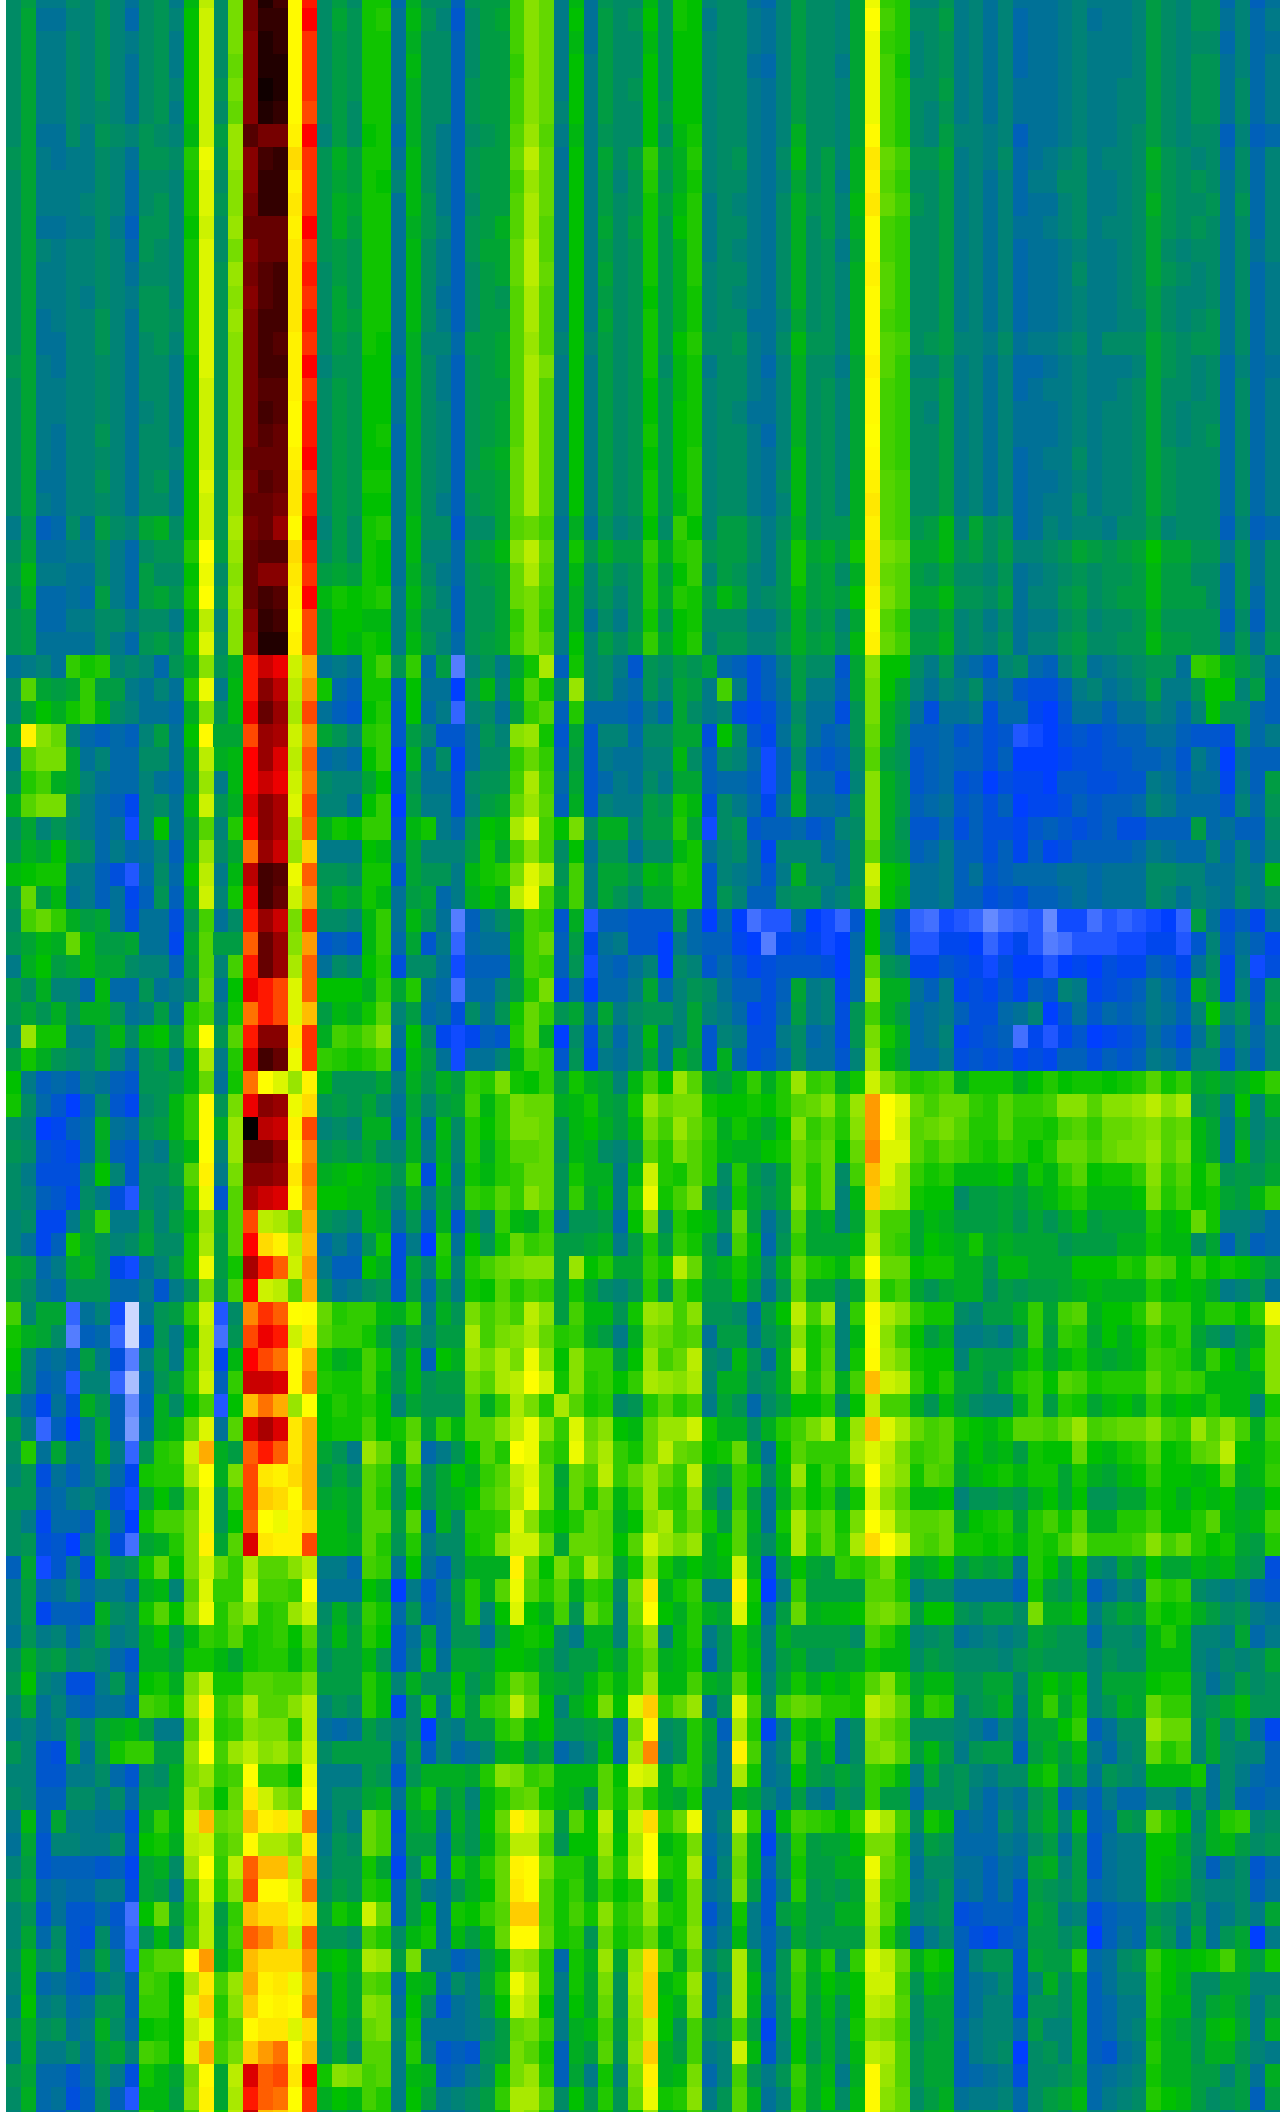

At2g22180  
At3g17980  
At2g43230  
At3g19310  
At2g33420  
At3g05820  
At3g59830  
At2g35210  
At1g23540  
At5g57690  
At3g55180  
At2g13620  
At5g42340  
At4g28280  
At5g15140  
At1g06970  
At2g26490  
At3g19020  
At4g36490  
At4g18395  
At3g16040  
At3g62640  
At1g11990  
At1g78940  
At3g07960  
At4g07960  
At5g15600  
At1g04700  
At3g24760  
At4g26400  
At2g07180  
At3g19970  
At5g55930  
At2g29410  
At4g35180  
At3g22750  
At5g64510  
At2g20320  
At4g27350  
At3g12620  
At3g20300  
At1g78460  
At1g18150  
At3g09590  
At1g05020  
At5g45840  
At4g02660  
At2g37070  
At1g09600  
At2g29050  
At3g07880  
At3g51030  
At4g23900  
At5g26940  
At3g08990  
At4g16480  
At1g64460  
At4g30850  
At5g55060  
At5g23720  
At4g17790  
At3g29180  
At3g47940  
At3g46180  
At2g46480  
At1g48880  
At2g18100  
At2g21770  
At2g29940  
At3g14950  
At4g14530  
At1g47765  
At5g35600  
At2g20620  
At2g18260  
At2g05160  
At3g42850  
At4g21490  
At3g11160  
At1g63190  
At2g38920  
At3g27440  
At1g15310  
At1g22110  
At4g23960  
At4g29550  
At3g51690  
At3g63020  
At1g65760  
At5g62310  
At5g53520

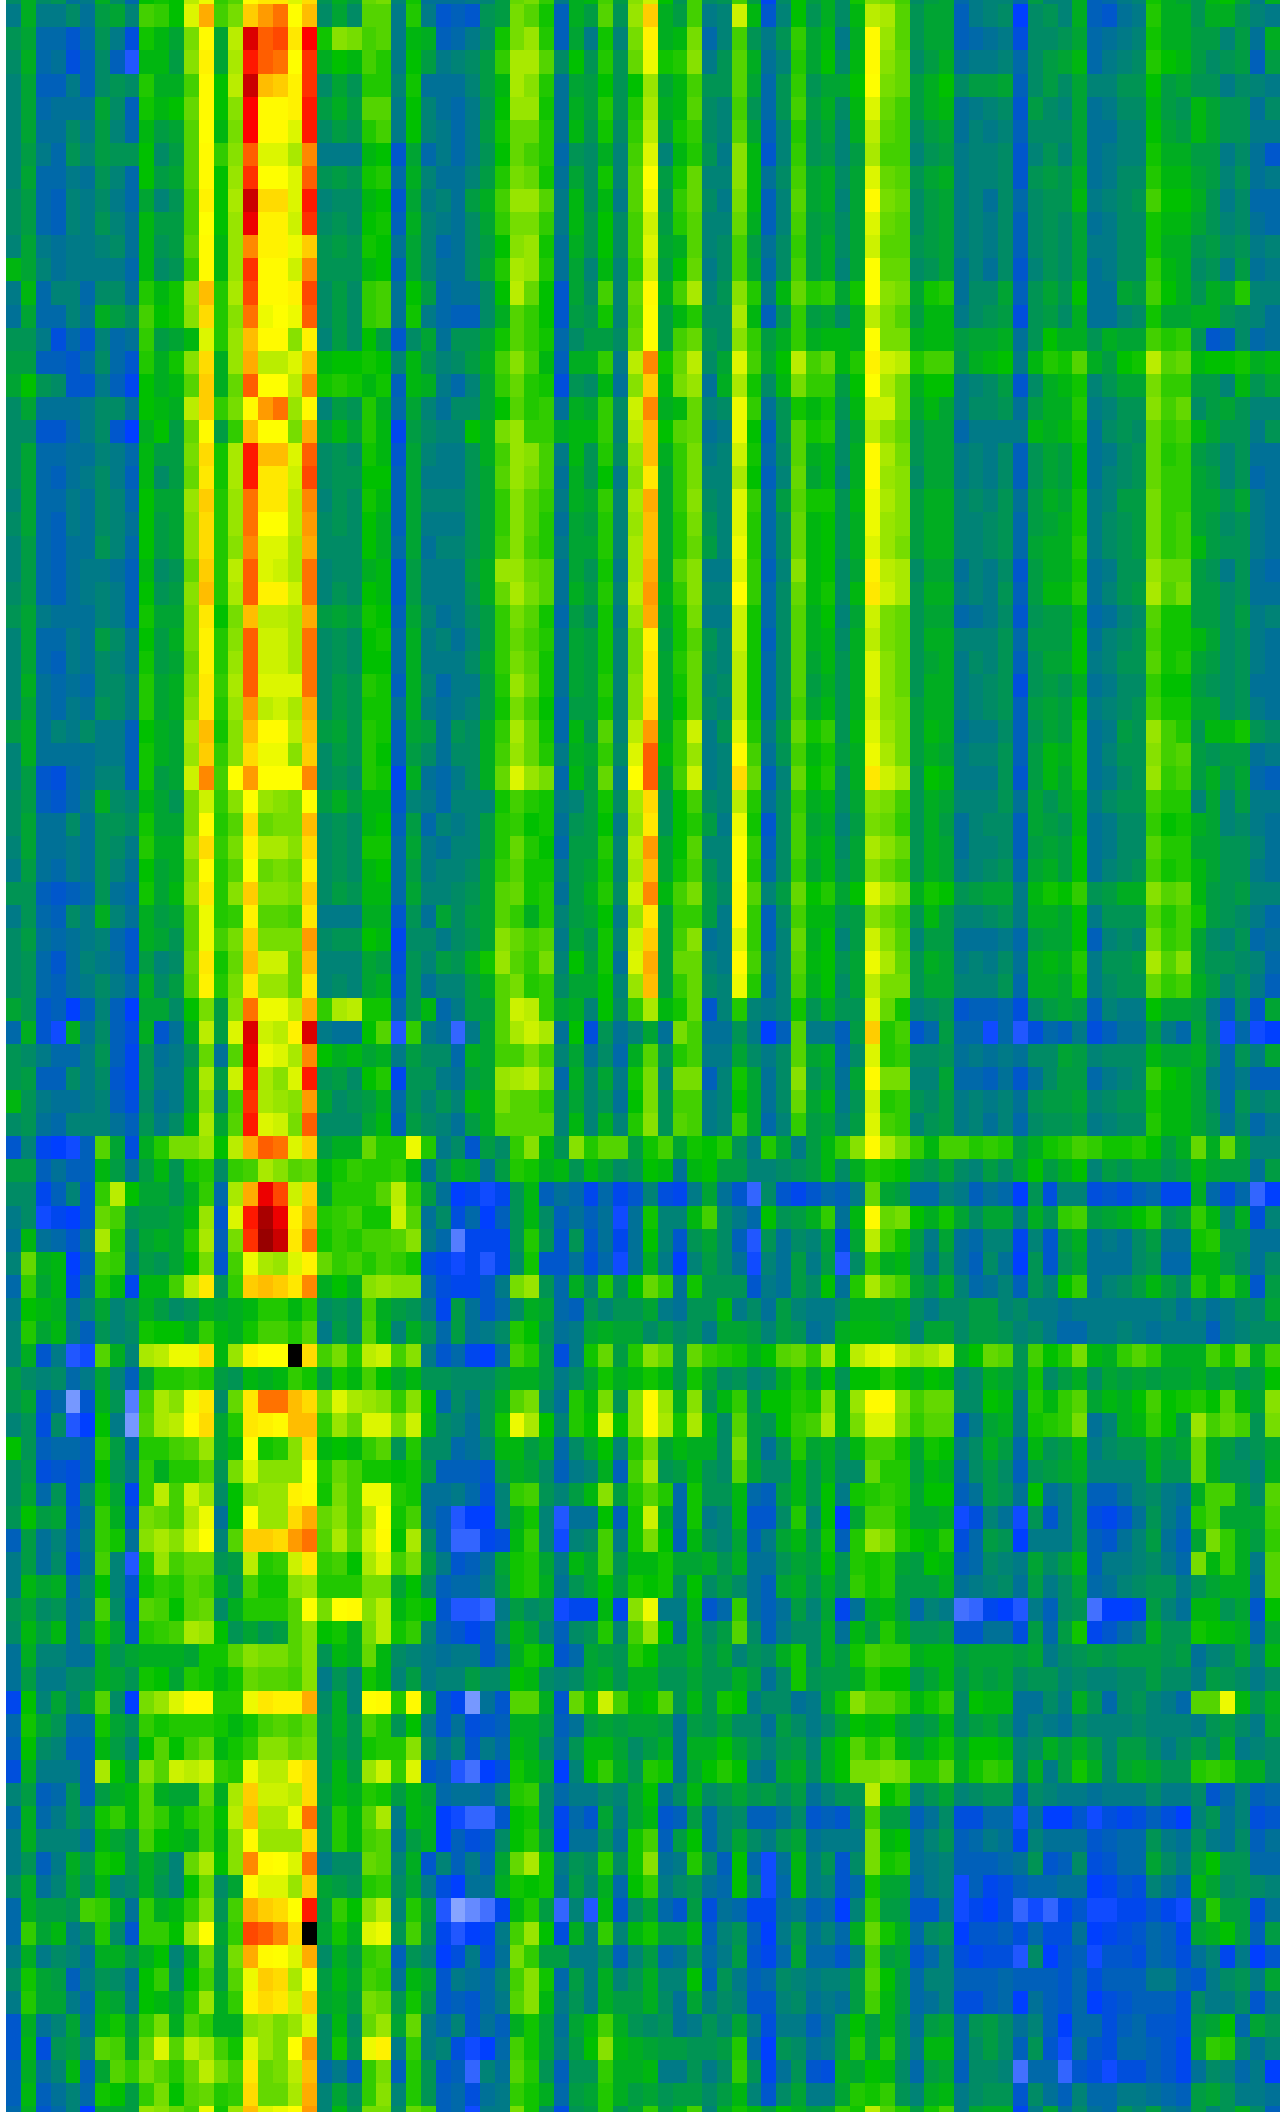

At1g65760  
At5g62310  
At5g53520  
At3g03900  
At5g25400  
At1g52570  
At1g24400  
At1g54560  
At5g53820  
At5g66020  
At2g04020  
At3g22360  
At4g13960  
At3g21960  
At3g52270  
At1g54450  
At3g61760  
At4g12930  
At4g14780  
At3g01020  
At4g37840  
At1g71770  
At4g08670  
At1g18280  
At1g32250  
At4g35650  
At3g60100  
At1g22760  
At3g18360  
At2g30630  
At3g51490  
At5g09570  
At4g04080  
At2g37610  
At2g31250  
At4g26830  
At1g26610  
At5g03620  
At5g03250  
At2g36190  
At5g19640  
At1g05577  
At5g57810  
At4g26770  
At4g35670  
At2g16750  
At1g30740  
At5g67550  
At1g22150  
At5g23680  
At5g39430  
At1g10740  
At4g20870  
At1g14290  
At1g09575  
At5g42000  
At5g58850  
At2g34110  
At5g25380  
At5g14300  
At3g50850  
At1g67570  
At1g15460  
At1g29200  
At1g73610  
At1g11570  
At5g38820  
At4g39000  
At5g43220  
At3g23870  
At3g10750  
At1g18050  
At5g39260  
At3g14960  
At3g06230  
At2g06150  
At3g10350  
At1g24938  
At3g22020  
At3g24640  
At2g35690  
At5g55950  
At3g61200  
At1g33770  
At5g01180  
At3g29640  
At5g63720  
At4g16040  
At2g19500  
At5g13350  
At5g03600

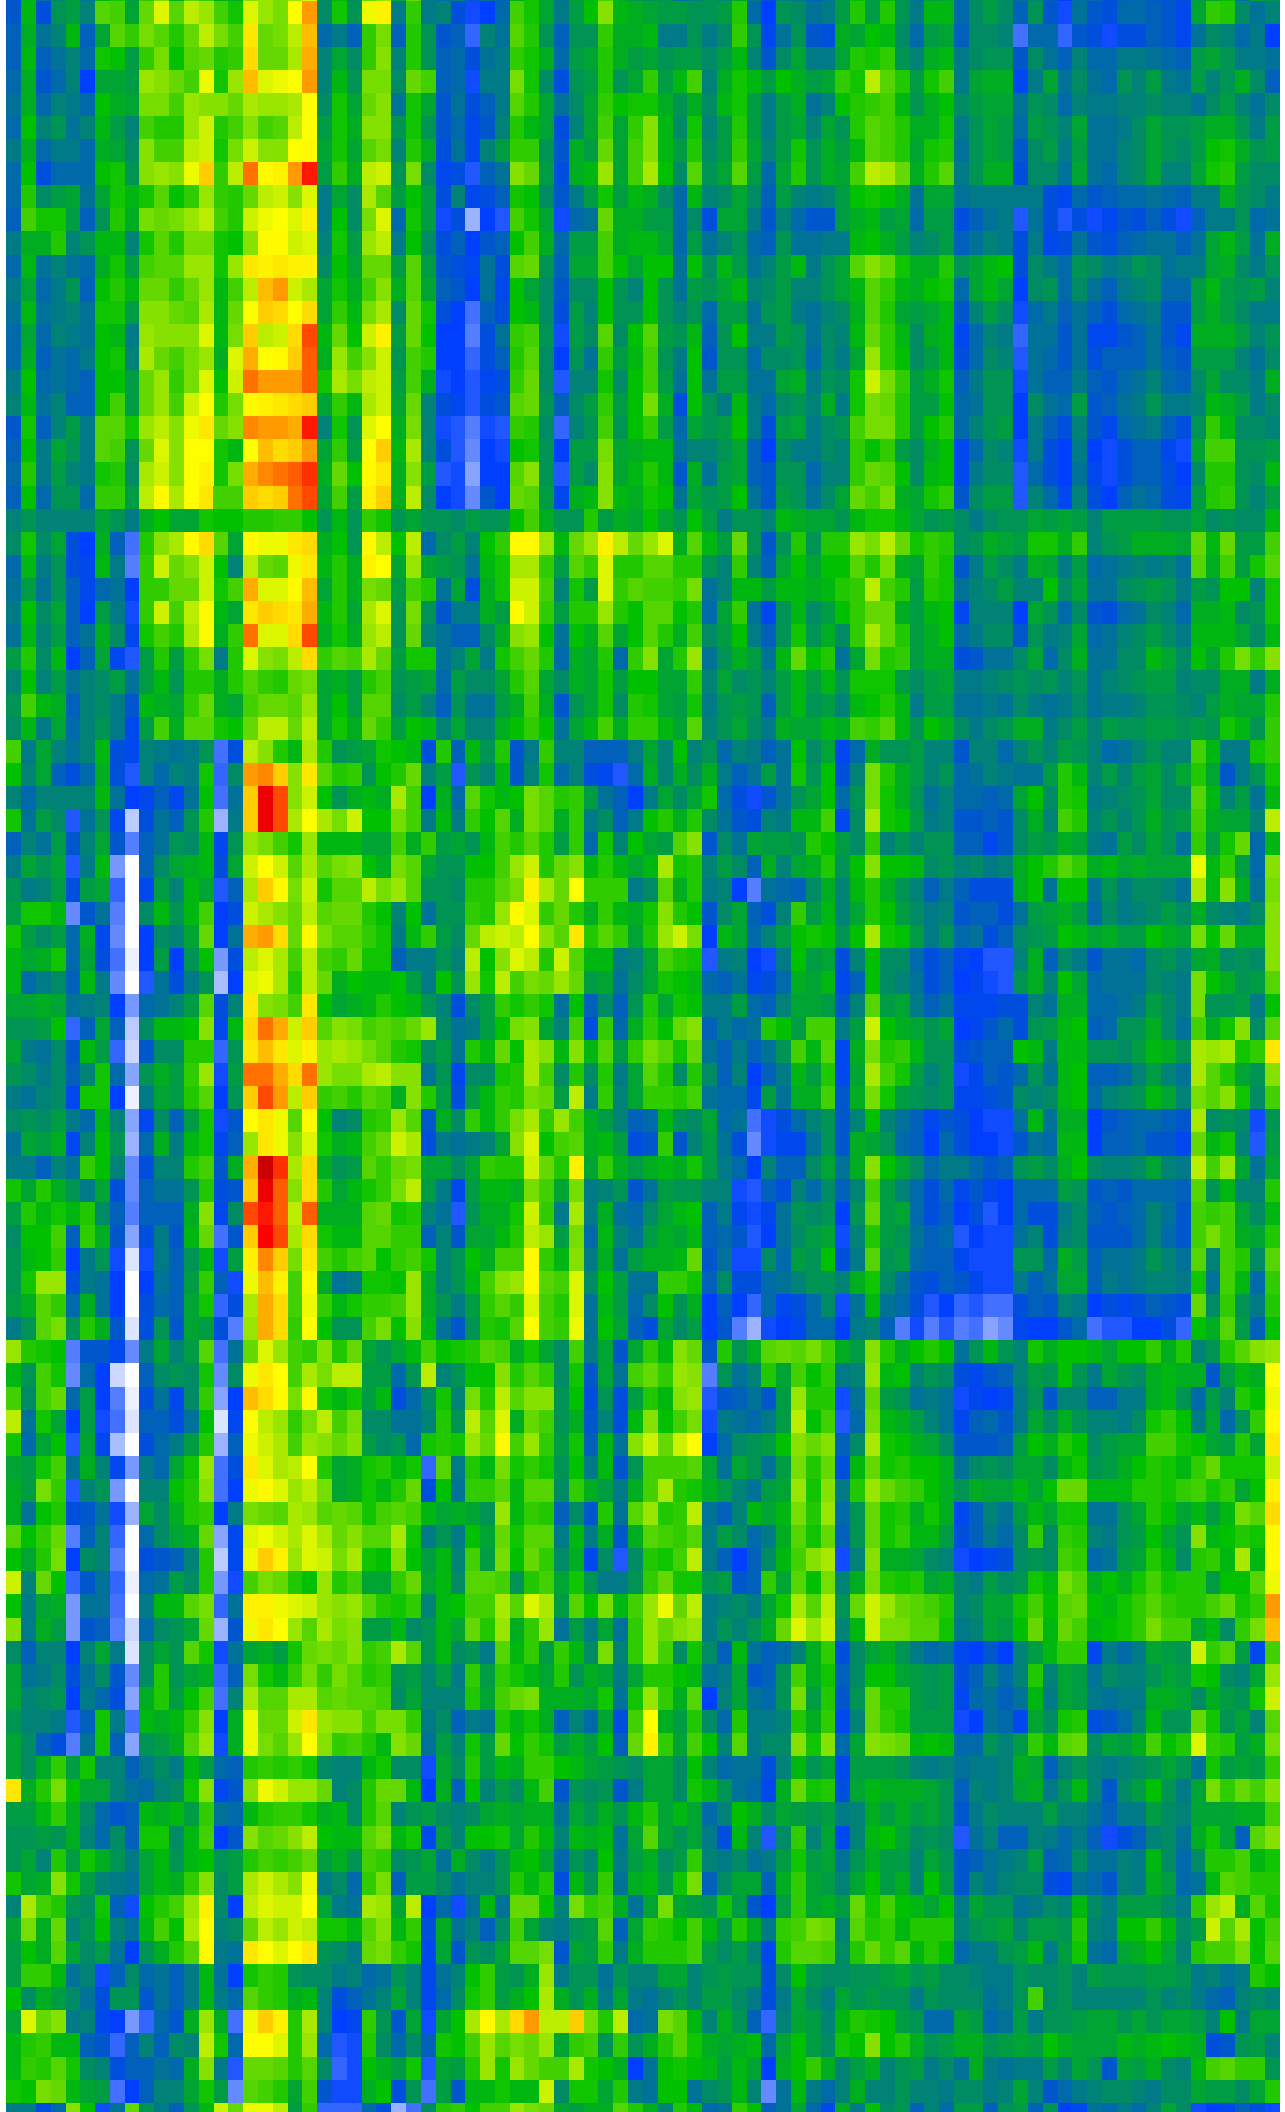

At2g19500  
At5g13350  
At5g03600  
At5g66150  
At1g07060  
At5g14990  
At5g26250  
At2g03210  
At1g53260  
At1g03250  
At5g28200  
At1g23270  
At2g25630  
At1g19090  
At3g44230  
At3g53070  
At1g45545  
At4g11720  
At2g23660  
At3g27410  
At5g46140  
At5g24560  
At4g36170  
At2g32760  
At5g12280  
At4g14790  
At3g27290  
At3g22050  
At1g61850  
At2g14040  
At2g23250  
At5g53670  
At4g09950  
At4g00110  
At1g19110  
At3g05990  
At3g46460  
At4g26570  
At4g35790  
At1g71940  
At4g35500  
At5g58730  
At3g25290  
At1g23800  
At1g36050  
At5g55550  
At5g57740  
At1g06890  
At2g38400  
At4g10810  
At1g06700  
At3g51770  
At5g47180  
At1g79670  
At1g71410  
At2g43790  
At5g11960  
At5g32440  
At3g25900  
At1g70770  
At1g79450  
At4g26470  
At4g23885  
At5g26990  
At3g53670  
At5g20680  
At3g24840  
At2g02960  
At1g64470  
At4g28540  
At5g58700  
At4g31130  
At5g08250  
At1g51640  
At5g03960  
At5g25830  
At2g24920  
At3g17920  
At1g21870  
At5g23170  
At1g05610  
At1g67960  
At5g60820  
At5g57000  
At5g51710  
At2g23340  
At5g54470  
At5g58720  
At1g54260  
At2g05590  
At2g43020  
At2g20070

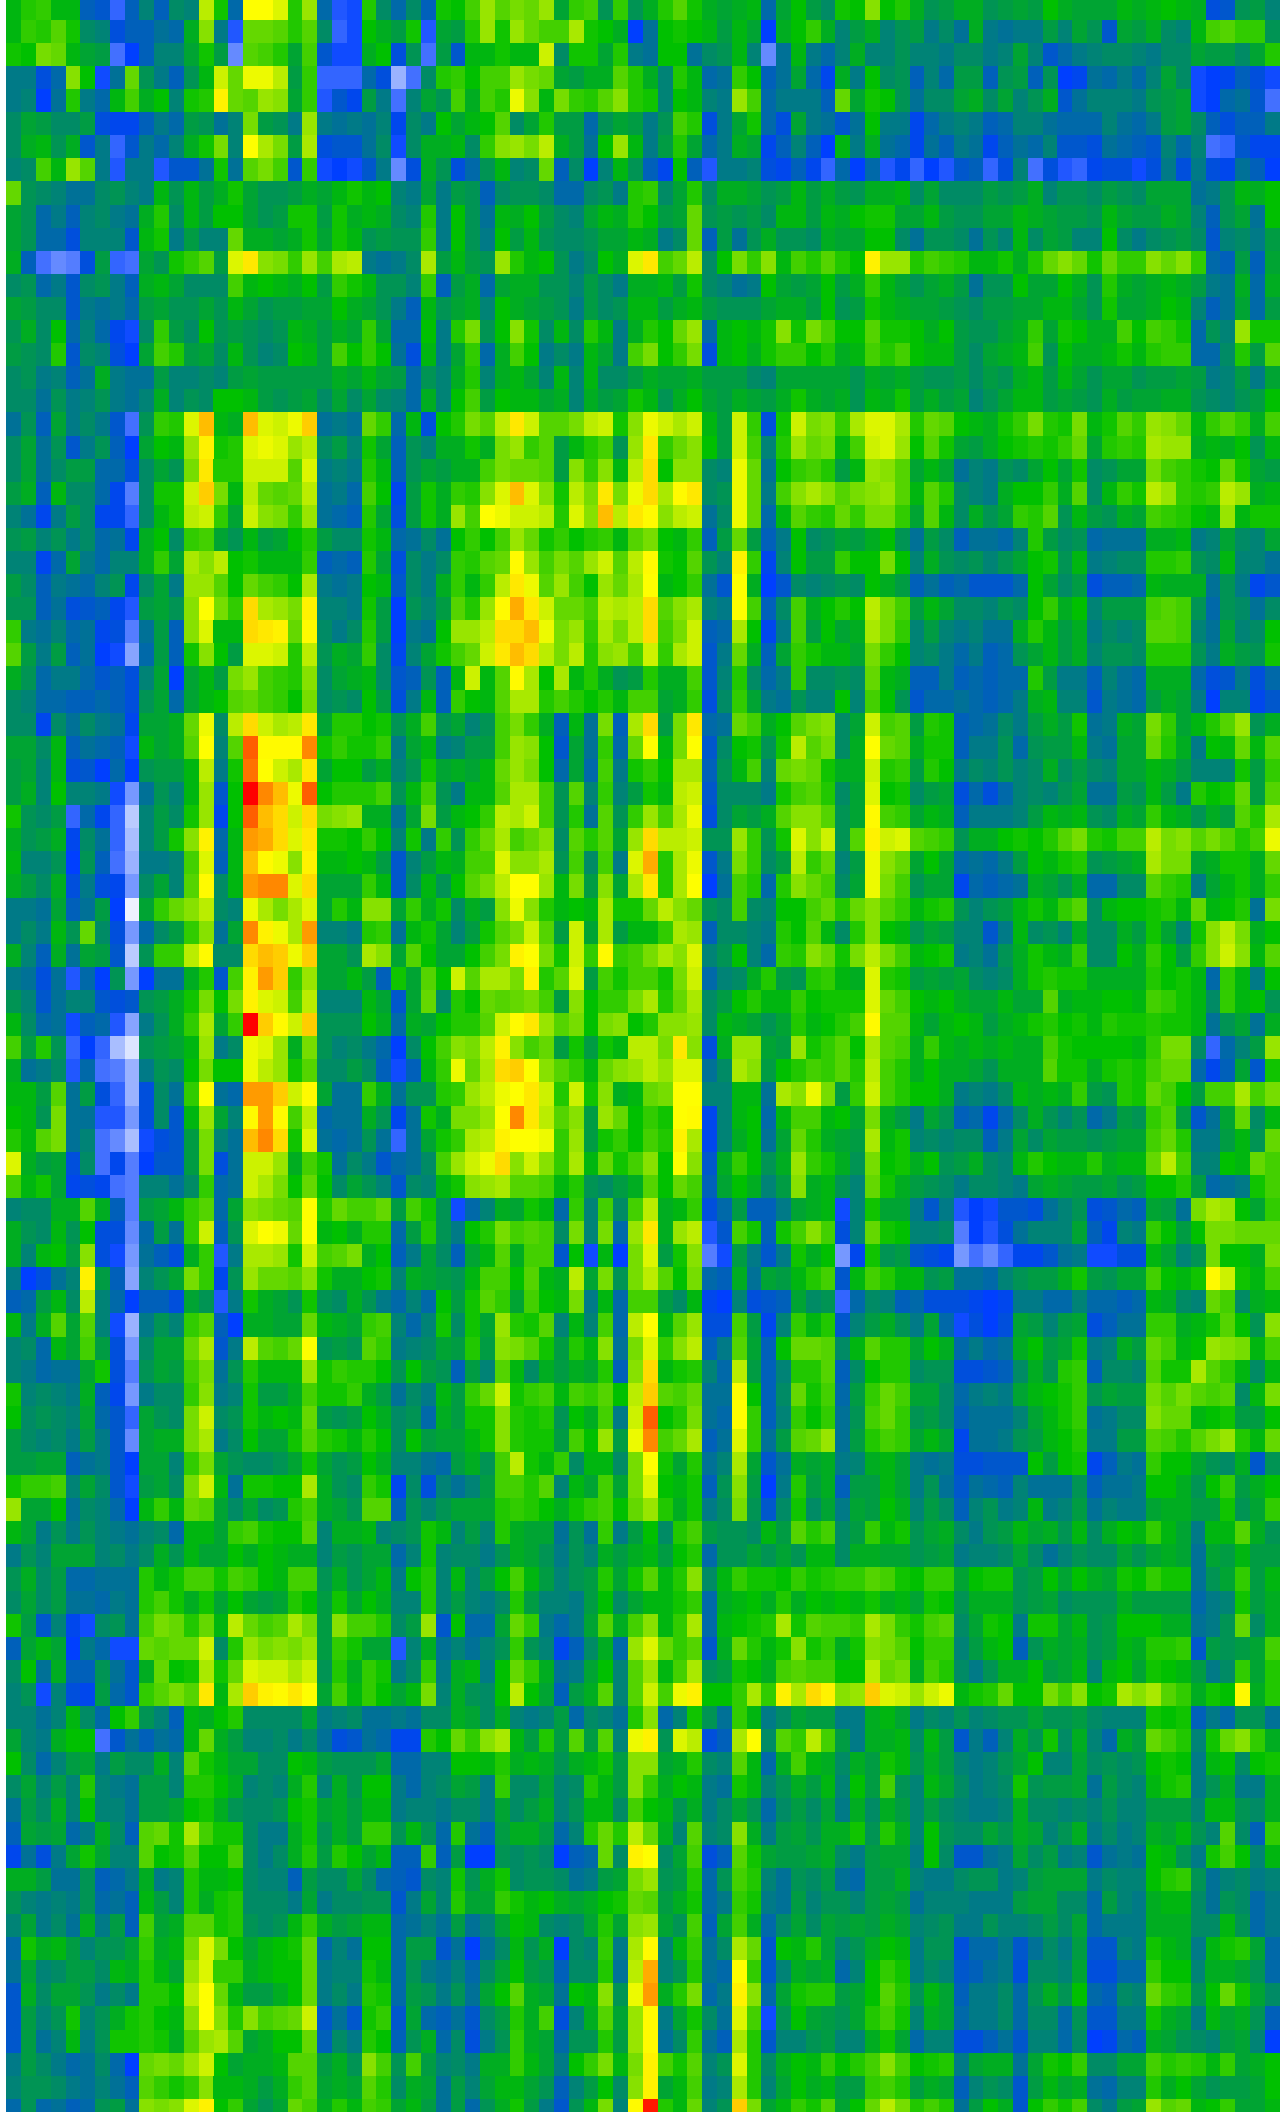

At1g54260  
At2g05590  
At2g43020  
At3g09970  
At5g52890  
At2g16040  
At3g10370  
At4g35360  
At2g27280  
At4g09430  
At1g62410  
At3g15020  
At5g51860  
At2g32350  
At2g07673  
At2g06390  
At1g21950  
At4g21640  
At2g30580  
At3g12420  
At3g21000  
At5g64990  
At5g01300  
At2g32050  
At5g17580  
At1g63180  
At3g27930  
At1g25540  
At3g61450  
At2g24460  
At2g04760  
At5g43330  
At5g49680  
At4g01660  
At2g22560  
At2g46140  
At5g47100  
At3g46440  
At3g20710  
At4g14950  
At1g45050  
At3g56820  
At2g23070  
At2g43690  
At3g51090  
At1g77840  
At5g13070  
At1g51740  
At3g12510  
At5g27610  
At2g41630  
At5g39380  
At5g39250  
At1g49160  
At1g13950  
At5g17610  
At2g19790  
At2g29070  
At5g59840  
At1g07750  
At2g42140  
At3g55890  
At3g56730  
At3g21800  
At3g25990  
At1g07860  
At2g28010  
At1g35647  
At1g55950  
At2g06330  
At5g48390  
At5g50460  
At5g21030  
At2g22600  
At3g13270  
At5g08600  
At3g25090  
At1g29480  
At3g49460  
At2g15600  
At3g04830  
At2g05090  
At2g27630  
At4g21950  
At2g39240  
At1g78750  
At5g44980  
At1g73700  
At3g09160  
At3g58020  
At2g22060  
At3g48960



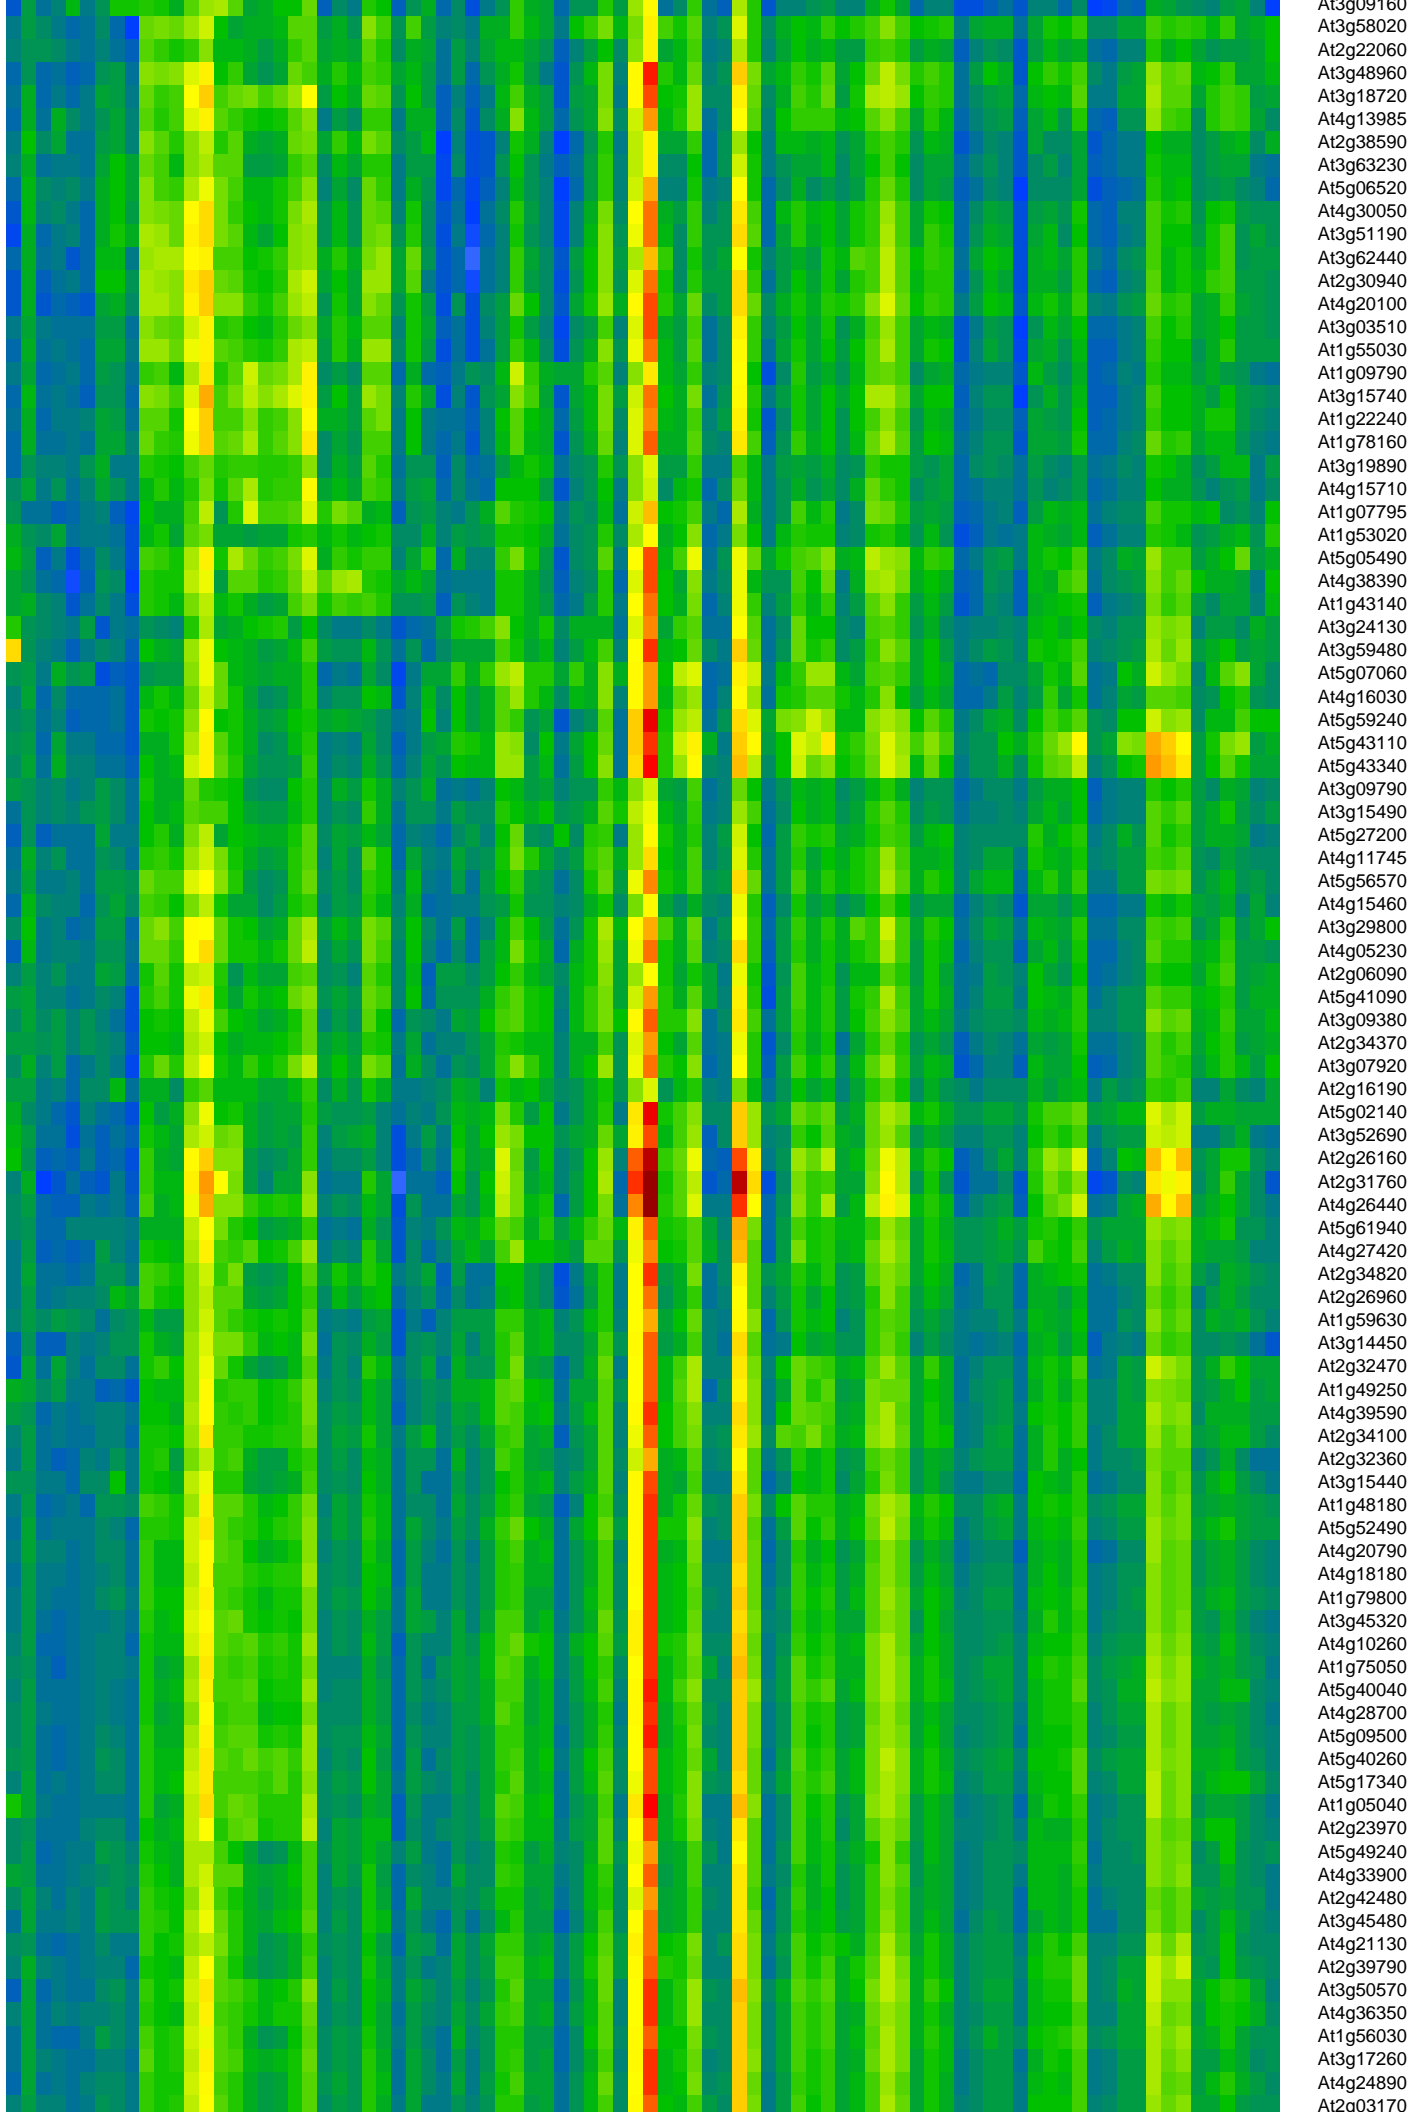

At3g09160  
At3g58020  
At2g22060  
At3g48960  
At4g13985  
At2g38590  
At3g63230  
At5g06520  
At4g30050  
At3g51190  
At3g62440  
At2g30940  
At4g20100  
At3g03510  
At1g55030  
At1g09790  
At3g15740  
At1g22240  
At1g78160  
At3g19890  
At4g15710  
At1g07795  
At1g53020  
At5g05490  
At4g38390  
At1g43140  
At3g24130  
At3g59480  
At5g07060  
At4g16030  
At5g59240  
At5g43110  
At5g43340  
At3g09790  
At3g15490  
At5g27200  
At4g11745  
At5g56570  
At4g15460  
At3g29800  
At4g05230  
At2g06090  
At5g41090  
At3g09380  
At2g34370  
At3g07920  
At2g16190  
At5g02140  
At3g52690  
At2g26160  
At2g31760  
At4g26440  
At5g61940  
At4g27420  
At2g34820  
At2g26960  
At1g59630  
At3g14450  
At2g32470  
At1g49250  
At4g39590  
At2g34100  
At2g32360  
At3g15440  
At1g48180  
At5g52490  
At4g20790  
At4g18180  
At1g79800  
At3g45320  
At4g10260  
At1g75050  
At5g40040  
At4g28700  
At5g09500  
At5g40260  
At5g17340  
At1g05040  
At2g23970  
At5g49240  
At4g33900  
At2g42480  
At3g45480  
At4g21130  
At2g39790  
At3g50570  
At4g36350  
At1g56030  
At3g17260  
At4g24890  
At2g03170

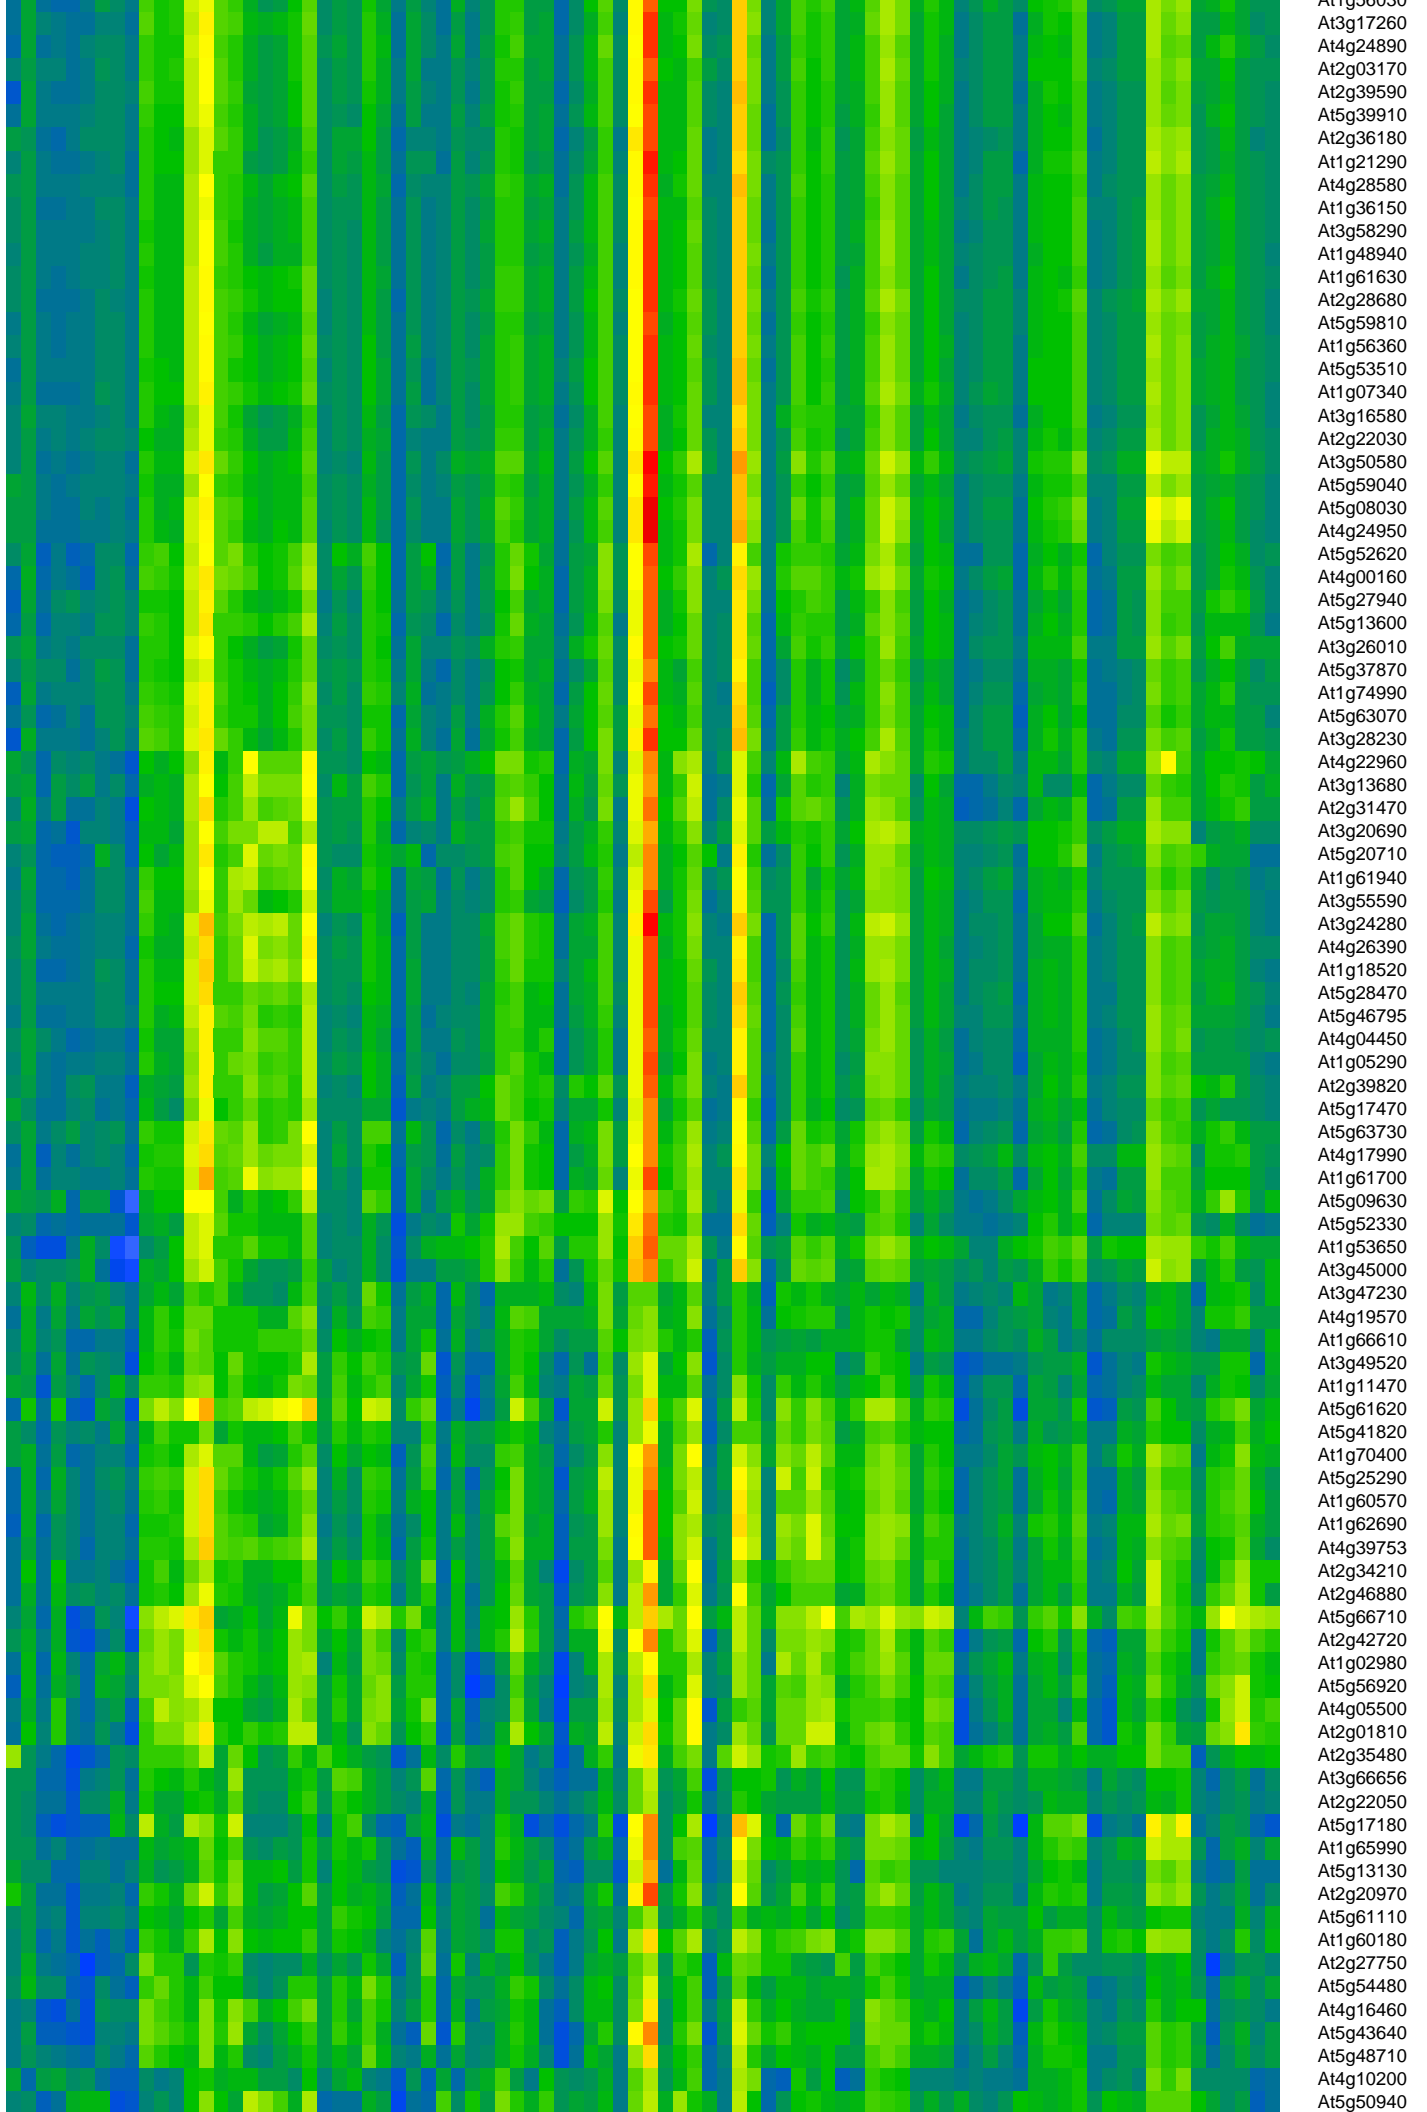

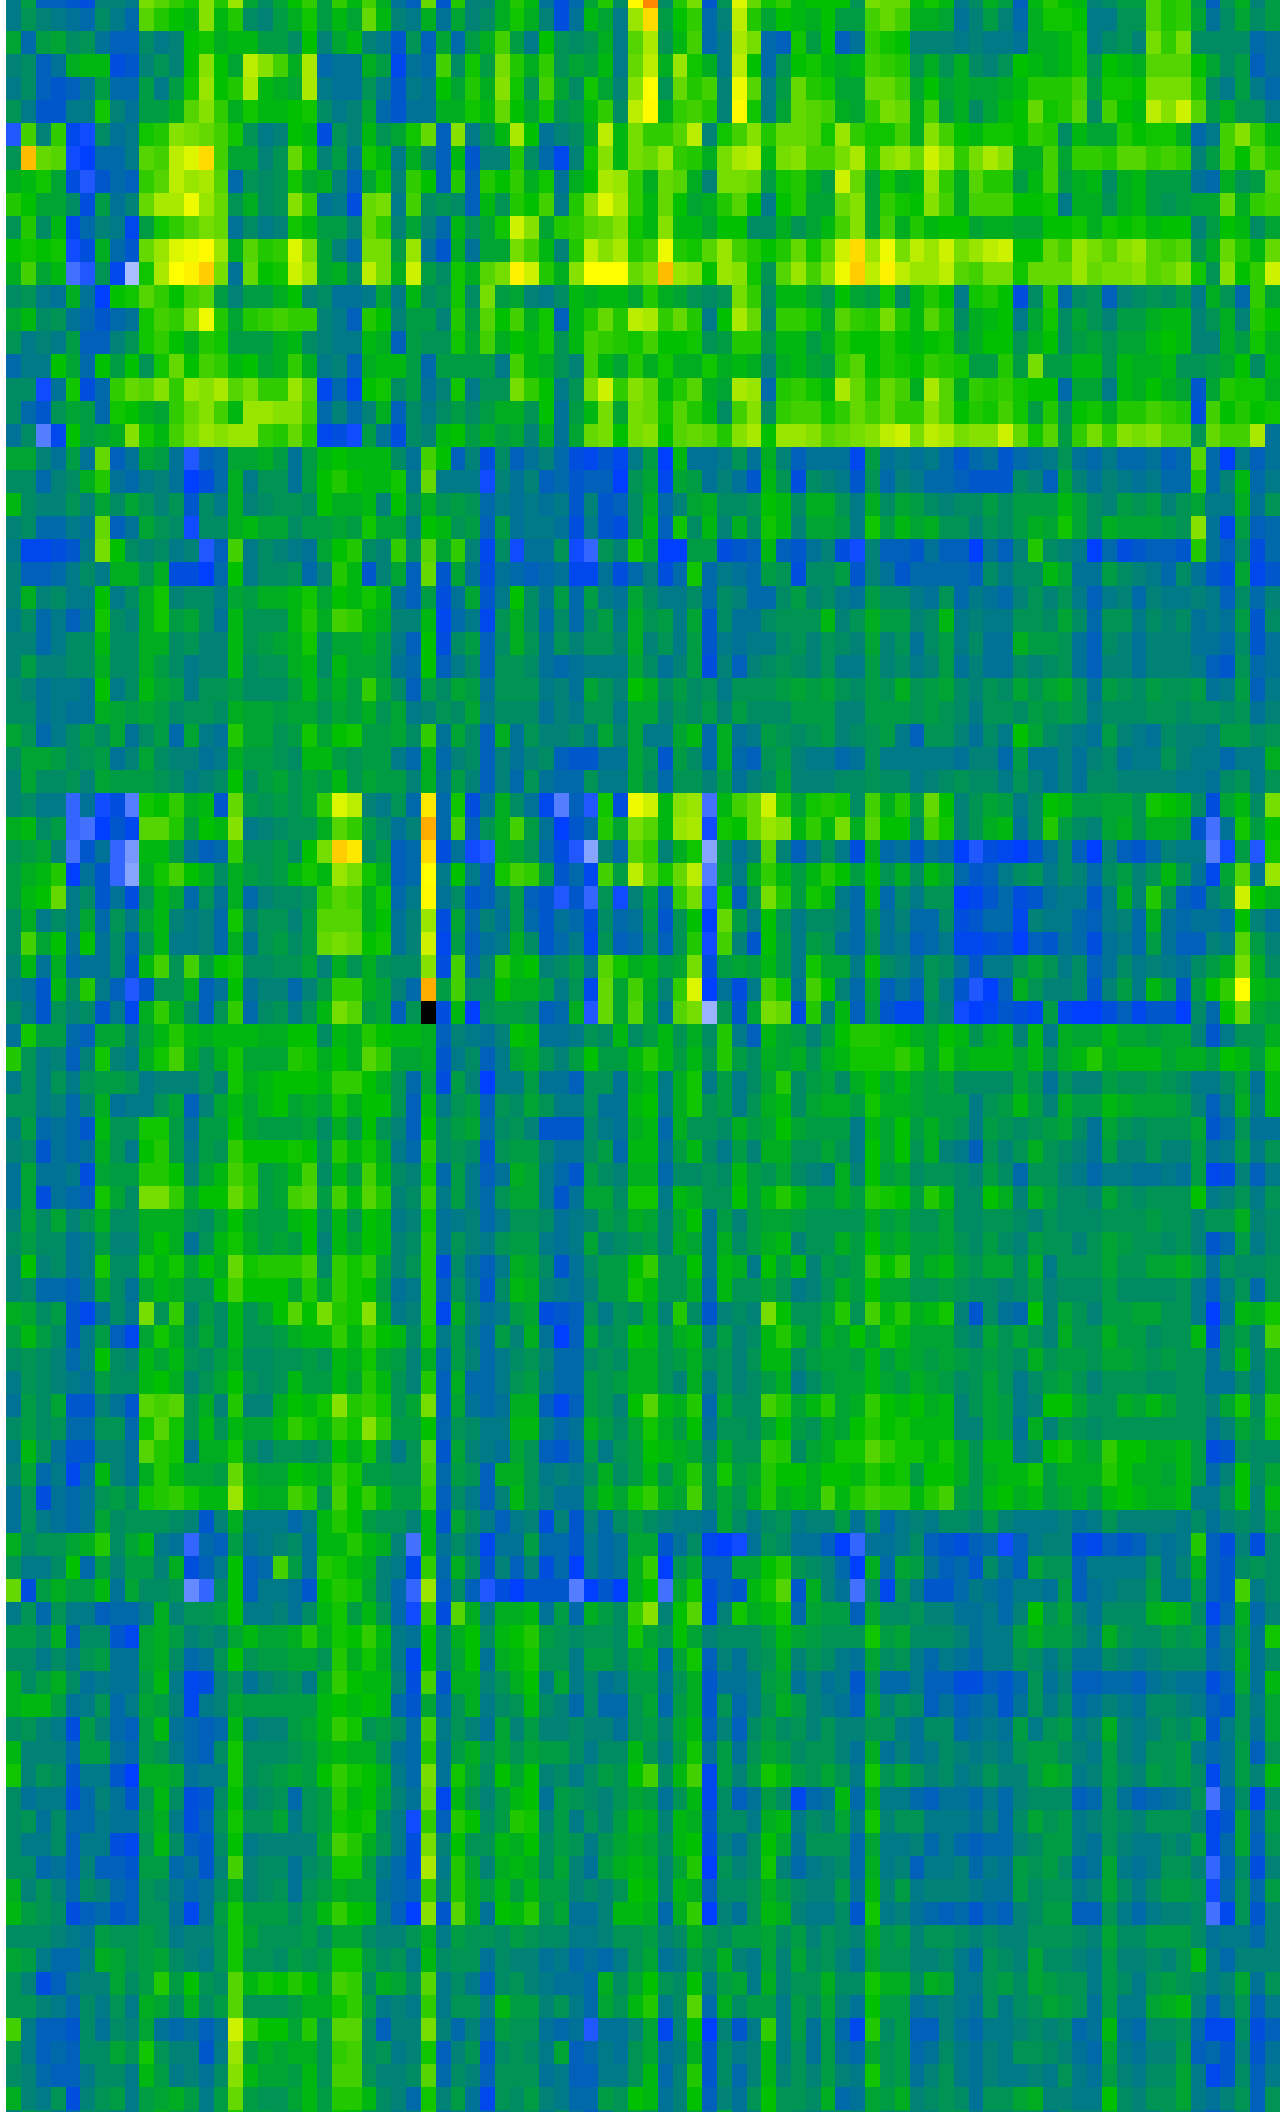

At5g48710  
At4g10200  
At5g50940  
At5g54010  
At4g00920  
At2g20810  
At4g31770  
At1g74750  
At1g70630  
At1g75230  
At2g20110  
At4g17895  
At1g12960  
At4g19550  
At1g04840  
At4g25280  
At1g19860  
At1g55915  
At2g38680  
At5g46730  
At3g17050  
At4g13090  
At3g23450  
At5g25460  
At1g36560  
At2g32750  
At1g28170  
At1g72580  
At2g27700  
At5g46300  
At3g02670  
At3g31380  
At1g32000  
At3g43680  
At2g37250  
At1g66070  
At5g67500  
At2g44520  
At2g38940  
At5g20790  
At3g02030  
At4g04300  
At2g27190  
At2g22490  
At3g02125  
At1g67790  
At2g04710  
At5g05260  
At3g14520  
At1g47470  
At1g23640  
At2g30650  
At1g69190  
At2g26120  
At1g70870  
At1g02710  
At3g23720  
At1g53930  
At2g12900  
At1g42200  
At5g07760  
At5g26020  
At2g03130  
At2g24620  
At5g35760  
At4g08450  
At4g07700  
At5g28070  
At5g47270  
At5g50880  
At2g29880  
At4g23080  
At2g47150  
At1g36600  
At2g06140  
At3g43970  
At2g03770  
At1g43240  
At5g60230  
At3g30800  
At4g08020  
At4g14670  
At2g15100  
At5g49370  
At1g06340  
At2g10630  
At1g13760  
At2g11940  
At5g50500  
At1g36910  
At2g30430

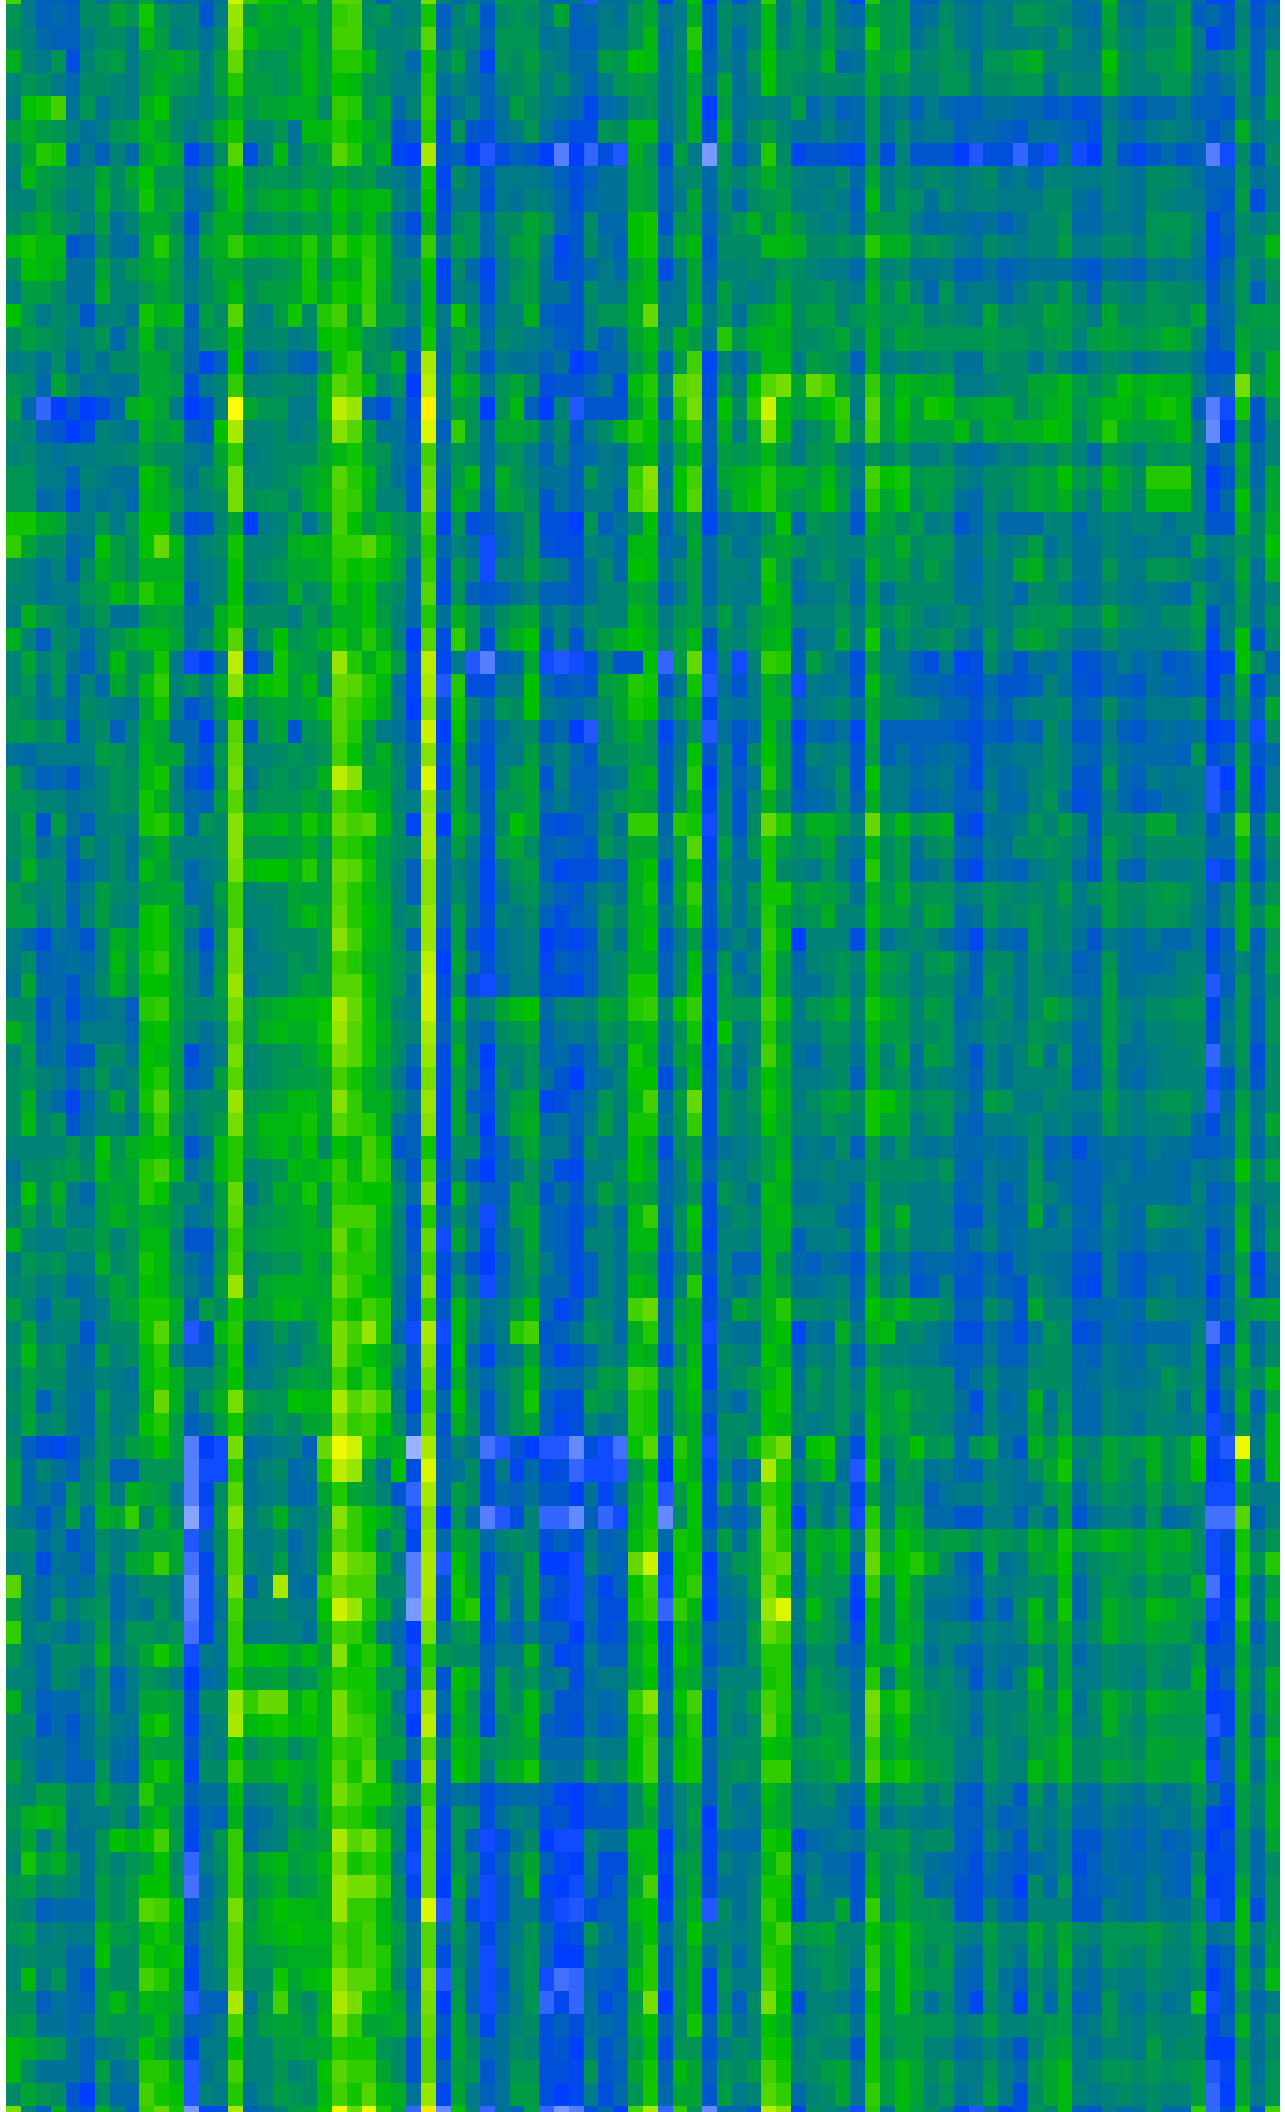

At5g50500  
At1g36910  
At2g30430  
At3g25185  
At1g50160  
At3g55670  
At4g12480  
At4g03570  
At4g22065  
At3g06970  
At1g21860  
At2g33160  
At4g31900  
At3g42250  
At5g37140  
At3g62490  
At2g13890  
At5g42740  
At2g47290  
At5g51090  
At5g41440  
At5g28620  
At2g06630  
At4g15755  
At2g19360  
At3g31340  
At1g57906  
At3g45380  
At5g28810  
At3g32290  
At3g32180  
At2g14810  
At2g24340  
At5g25750  
At2g06700  
At2g15700  
At5g46000  
At4g20800  
At1g31270  
At5g23640  
At2g16620  
At1g37537  
At1g63320  
At3g29792  
At3g29791  
At3g29775  
At2g17960  
At1g63070  
At4g02910  
At4g17585  
At4g03800  
At3g42350  
At1g44478  
At3g42900  
At2g21000  
At4g16930  
At5g40130  
At2g06490  
At2g24410  
At5g37640  
At2g05080  
At1g29960  
At2g16200  
At1g33670  
At3g25450  
At2g23400  
At1g79170  
At4g04430  
At4g05300  
At3g42970  
At1g29570  
At1g36105  
At2g22940  
At2g12520  
At2g12150  
At1g72080  
At2g18115  
At2g14700  
At3g30660  
At5g33250  
At4g29600  
At3g43530  
At3g12190  
At2g05820  
At3g27370  
At1g33820  
At1g36120  
At1g34842  
At4g03880  
At4g07530  
At4g22500

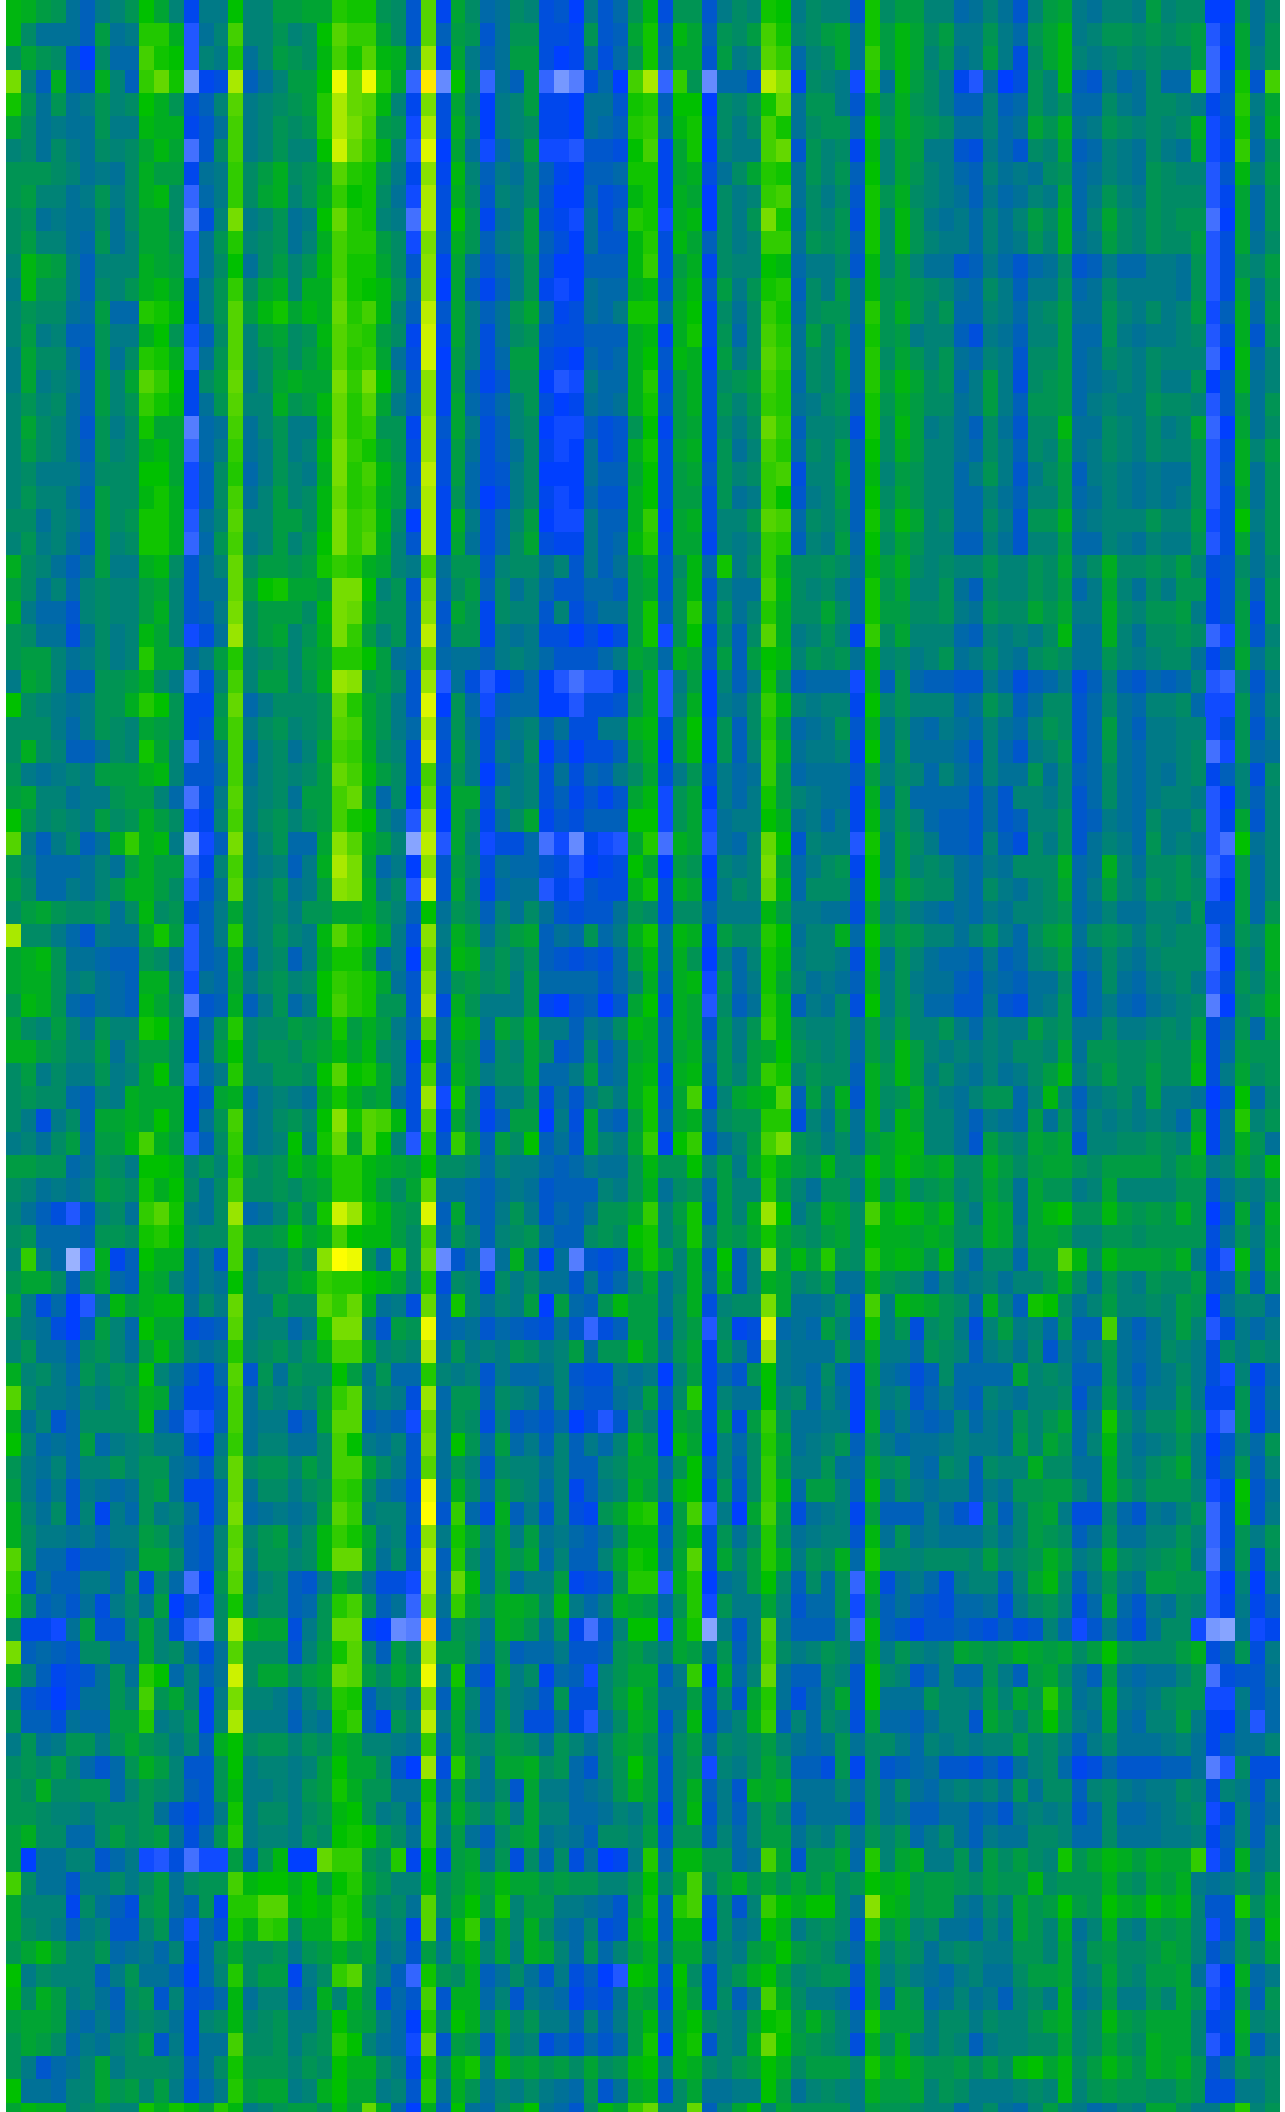

At4g03880  
At4g07530  
At4g22500  
At2g10780  
At2g01310  
At4g08820  
At3g10950  
At2g04870  
At5g35340  
At3g43060  
At2g01500  
At3g51560  
At2g06120  
At1g76910  
At4g07580  
At4g03750  
At1g42410  
At1g23680  
At5g36900  
At2g10020  
At1g41770  
At5g38870  
At1g61410  
At3g42130  
At4g20290  
At2g04370  
At1g42610  
At5g07850  
At1g35790  
At1g68420  
At2g12610  
At2g15420  
At3g55930  
At4g05610  
At5g03400  
At4g03860  
At4g07460  
At2g12880  
At3g30620  
At5g54410  
At4g22020  
At5g35070  
At1g72350  
At3g44140  
At4g05340  
At4g00890  
At4g15150  
At4g07370  
At2g16830  
At2g34120  
At3g23850  
At4g08970  
At3g50420  
At3g45490  
At1g19440  
At1g02540  
At1g50800  
At4g12270  
At4g26460  
At2g47660  
At3g32100  
At5g50910  
At4g34330  
At2g02280  
At4g31680  
At5g35820  
At1g20400  
At4g07920  
At4g12160  
At2g10610  
At3g06050  
At1g27550  
At5g06040  
At3g42340  
At4g03680  
At2g21460  
At1g53420  
At5g36650  
At4g29630  
At1g44070  
At2g44195  
At3g25650  
At5g10680  
At4g30380  
At4g21360  
At2g19300  
At2g45000  
At2g29770  
At2g20510  
At2g12170  
At5g35140  
At2g12000

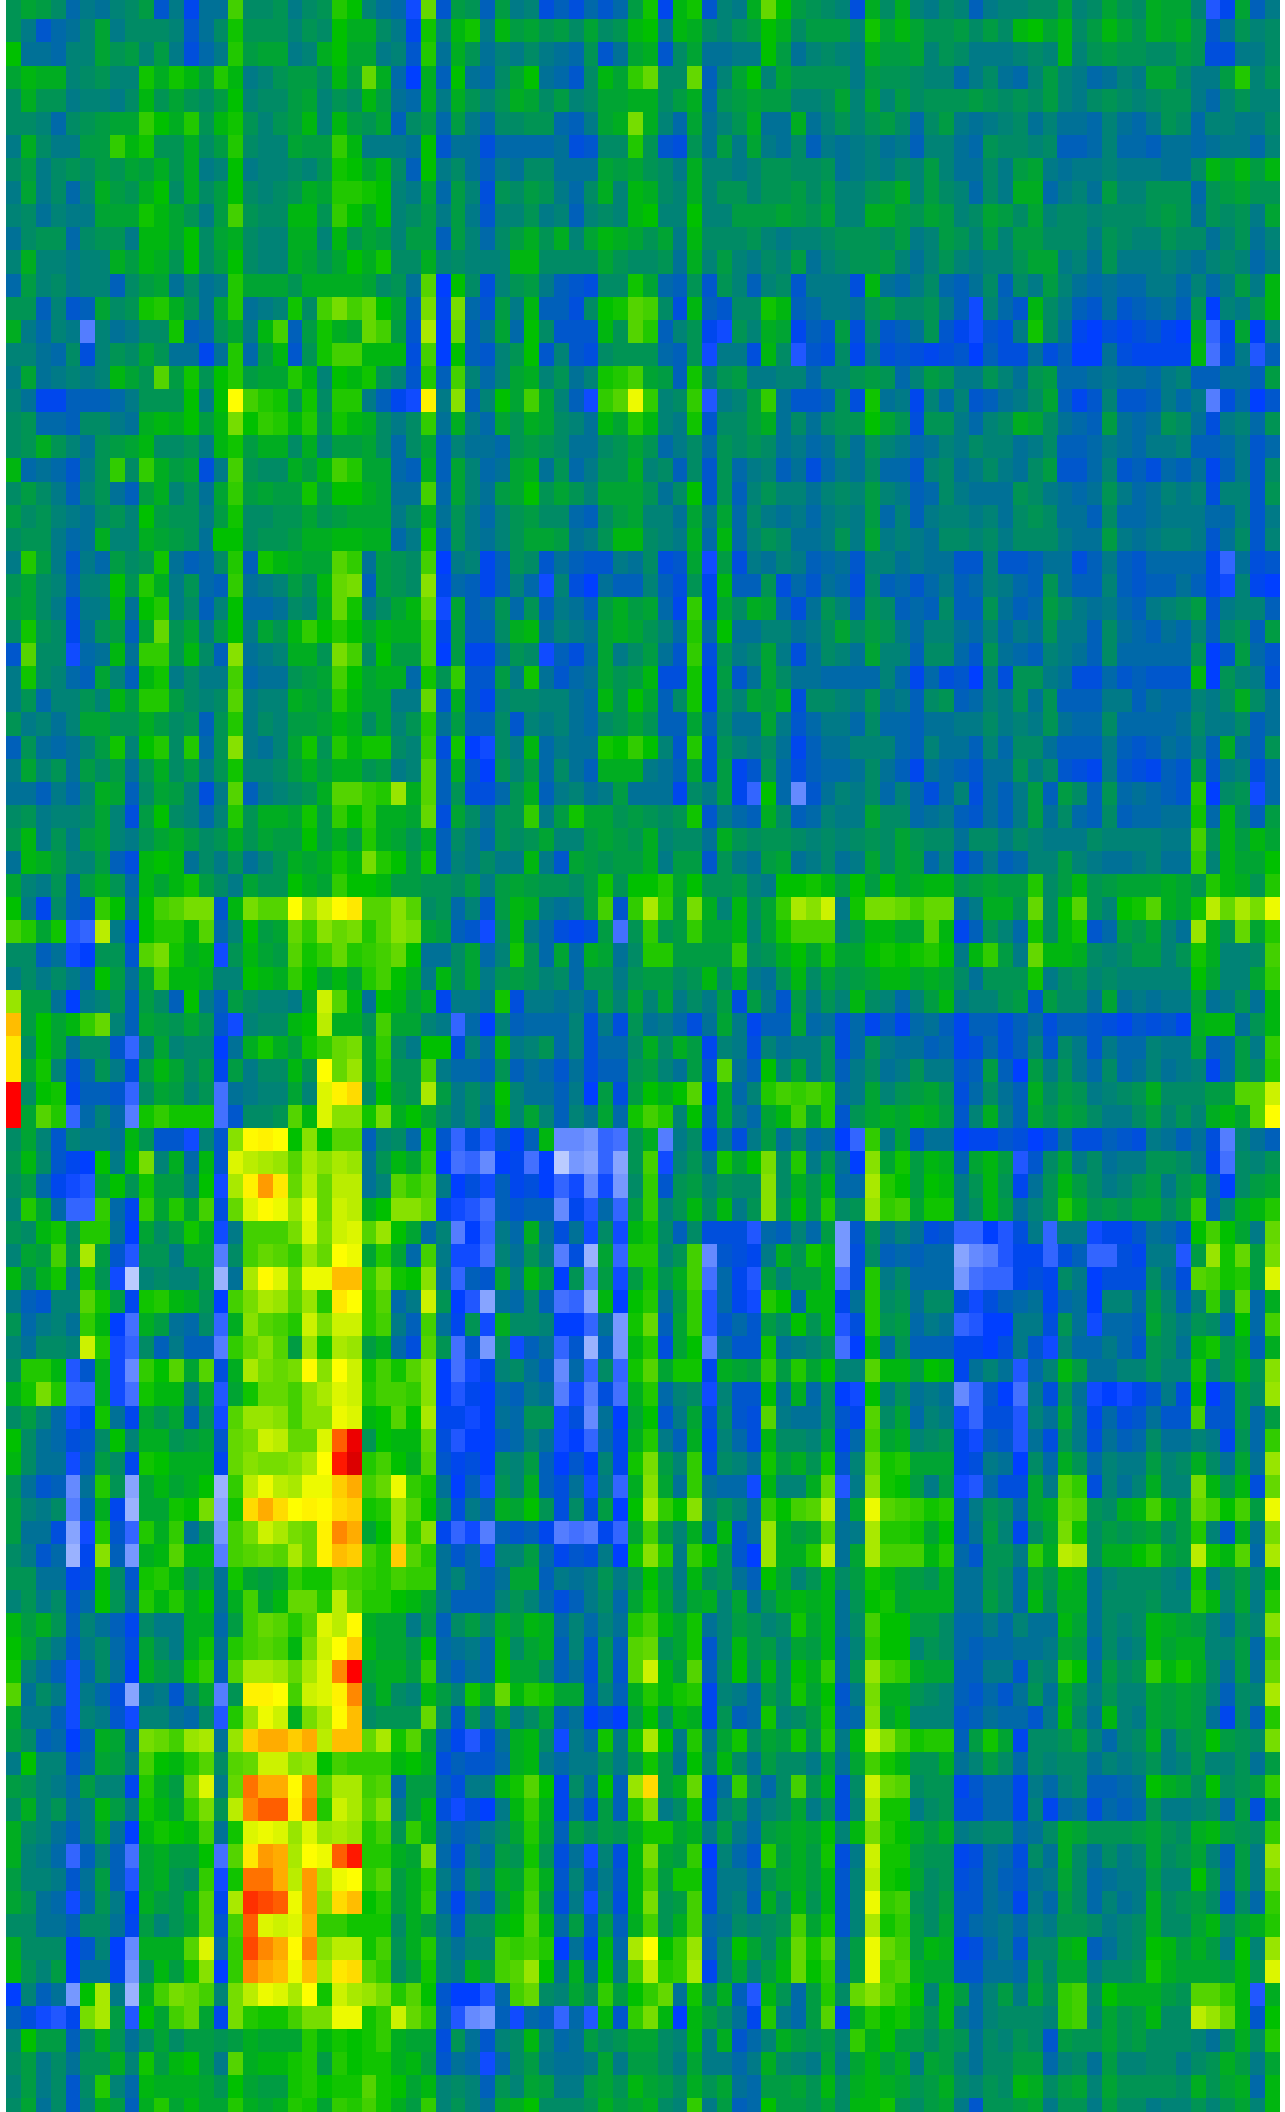

At2g20510  
At5g35140  
At2g12990  
At1g54420  
At5g37960  
At4g04560  
At2g19840  
At3g57850  
At2g11490  
At1g52020  
At1g62760  
At3g45360  
At5g26900  
At4g03810  
At4g03990  
At3g29732  
At2g30970  
At2g26880  
At2g35570  
At2g06310  
At1g36095  
At1g36670  
At3g57210  
At4g07780  
At2g10010  
At4g07490  
At2g10840  
At1g27790  
At2g15190  
At2g06640  
At2g05550  
At2g10490  
At3g31403  
At1g09530  
At2g10900  
At3g56700  
At1g76780  
At2g02690  
At1g50890  
At2g41830  
At2g31940  
At3g25810  
At5g54620  
At1g72240  
At2g43870  
At4g37850  
At1g12950  
At1g55390  
At3g03250  
At4g22910  
At4g26650  
At3g07330  
At4g19050  
At4g02610  
At4g01480  
At2g39780  
At1g74210  
At2g33470  
At3g04080  
At3g07810  
At2g39130  
At5g61350  
At5g23030  
At5g40730  
At1g63220  
At1g63000  
At1g75780  
At5g32590  
At5g36150  
At3g05860  
At2g35890  
At3g07070  
At5g65160  
At1g61080  
At1g09170  
At2g42100  
At5g65090  
At5g02390  
At5g46370  
At3g60330  
At5g24880  
At2g41970  
At5g19600  
At5g35700  
At3g13782  
At5g55290  
At4g38920  
At3g42060  
At1g39750  
At3g30370  
At3g31310

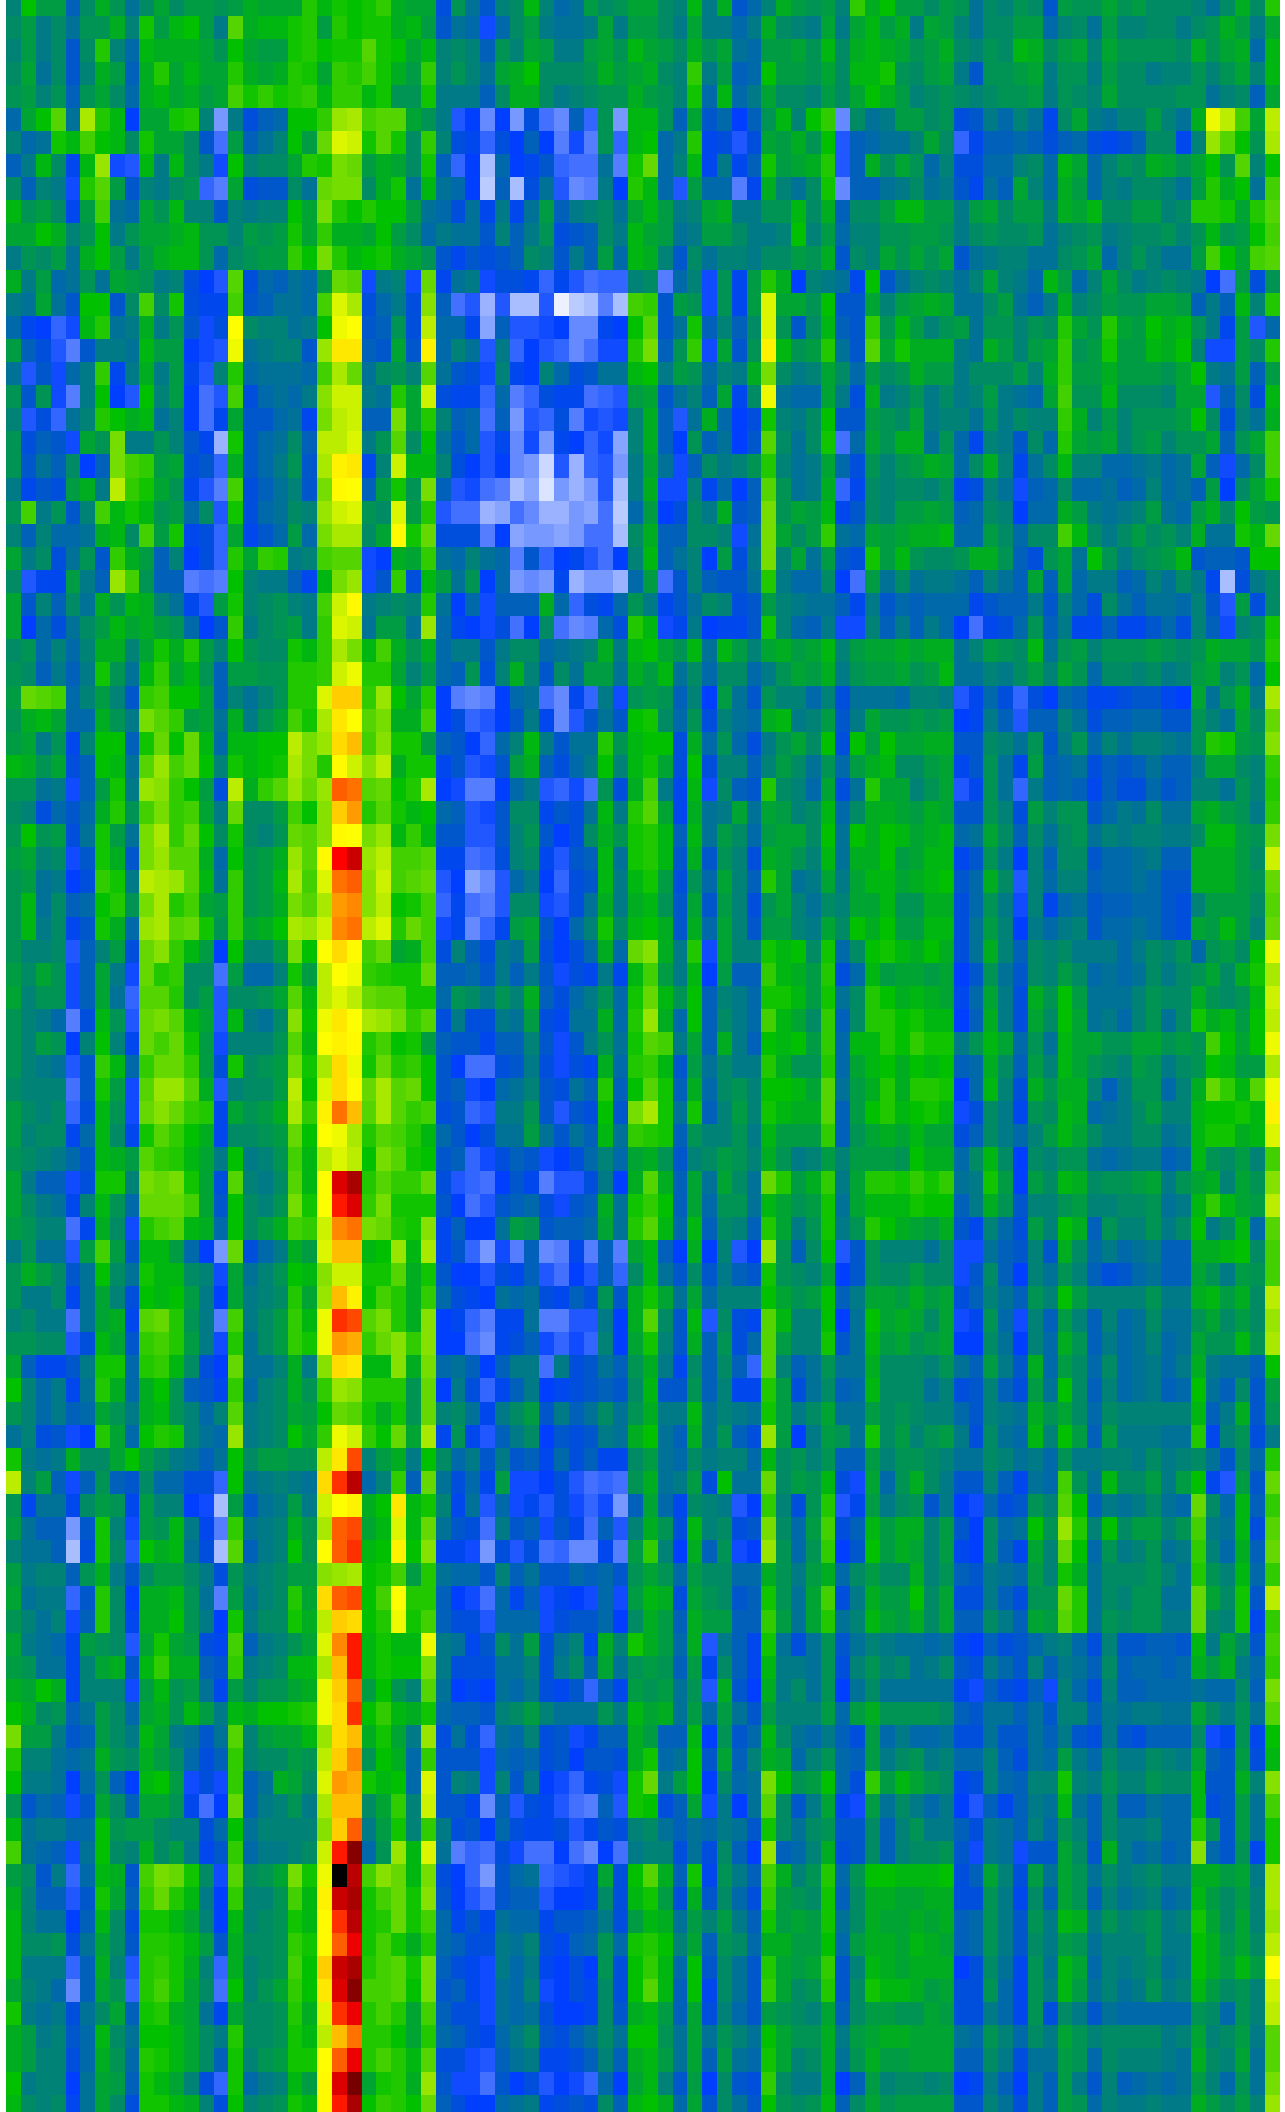

At3g42060  
At1g39750  
At3g30370  
At3g31310  
At1g48060  
At3g48140  
At3g43800  
At5g11810  
At1g04410  
At4g24250  
At3g17730  
At3g46880  
At4g03780  
At2g45790  
At3g12260  
At1g63940  
At2g17265  
At1g16560  
At4g38220  
At4g37540  
At3g19450  
At4g12390  
At1g24170  
At1g27340  
At3g07270  
At2g31750  
At5g05840  
At3g16560  
At2g27570  
At3g17600  
At1g57560  
At1g02570  
At1g51880  
At4g26880  
At5g01060  
At1g55640  
At5g26070  
At5g43230  
At1g59725  
At2g34330  
At3g20850  
At3g46810  
At5g37210  
At5g54030  
At5g40090  
At3g19320  
At5g51520  
At1g22880  
At2g48080  
At4g01630  
At3g59710  
At4g31250  
At5g36270  
At5g51270  
At1g04040  
At2g23560  
At5g36140  
At5g14330  
At2g43150  
At1g54120  
At4g09290  
At2g07440  
At5g67060  
At4g04900  
At1g34330  
At1g49660  
At3g59340  
At2g22170  
At5g42600  
At4g11210  
At2g25150  
At2g23620  
At5g43590  
At1g30850  
At1g61950  
At1g05990  
At4g00130  
At4g01110  
At3g44990  
At3g49960  
At3g10710  
At5g07450  
At1g69240  
At3g20460  
At4g20450  
At5g49270  
At5g58010  
At1g64930  
At2g29000  
At5g26080  
At4g29180  
At3g01730

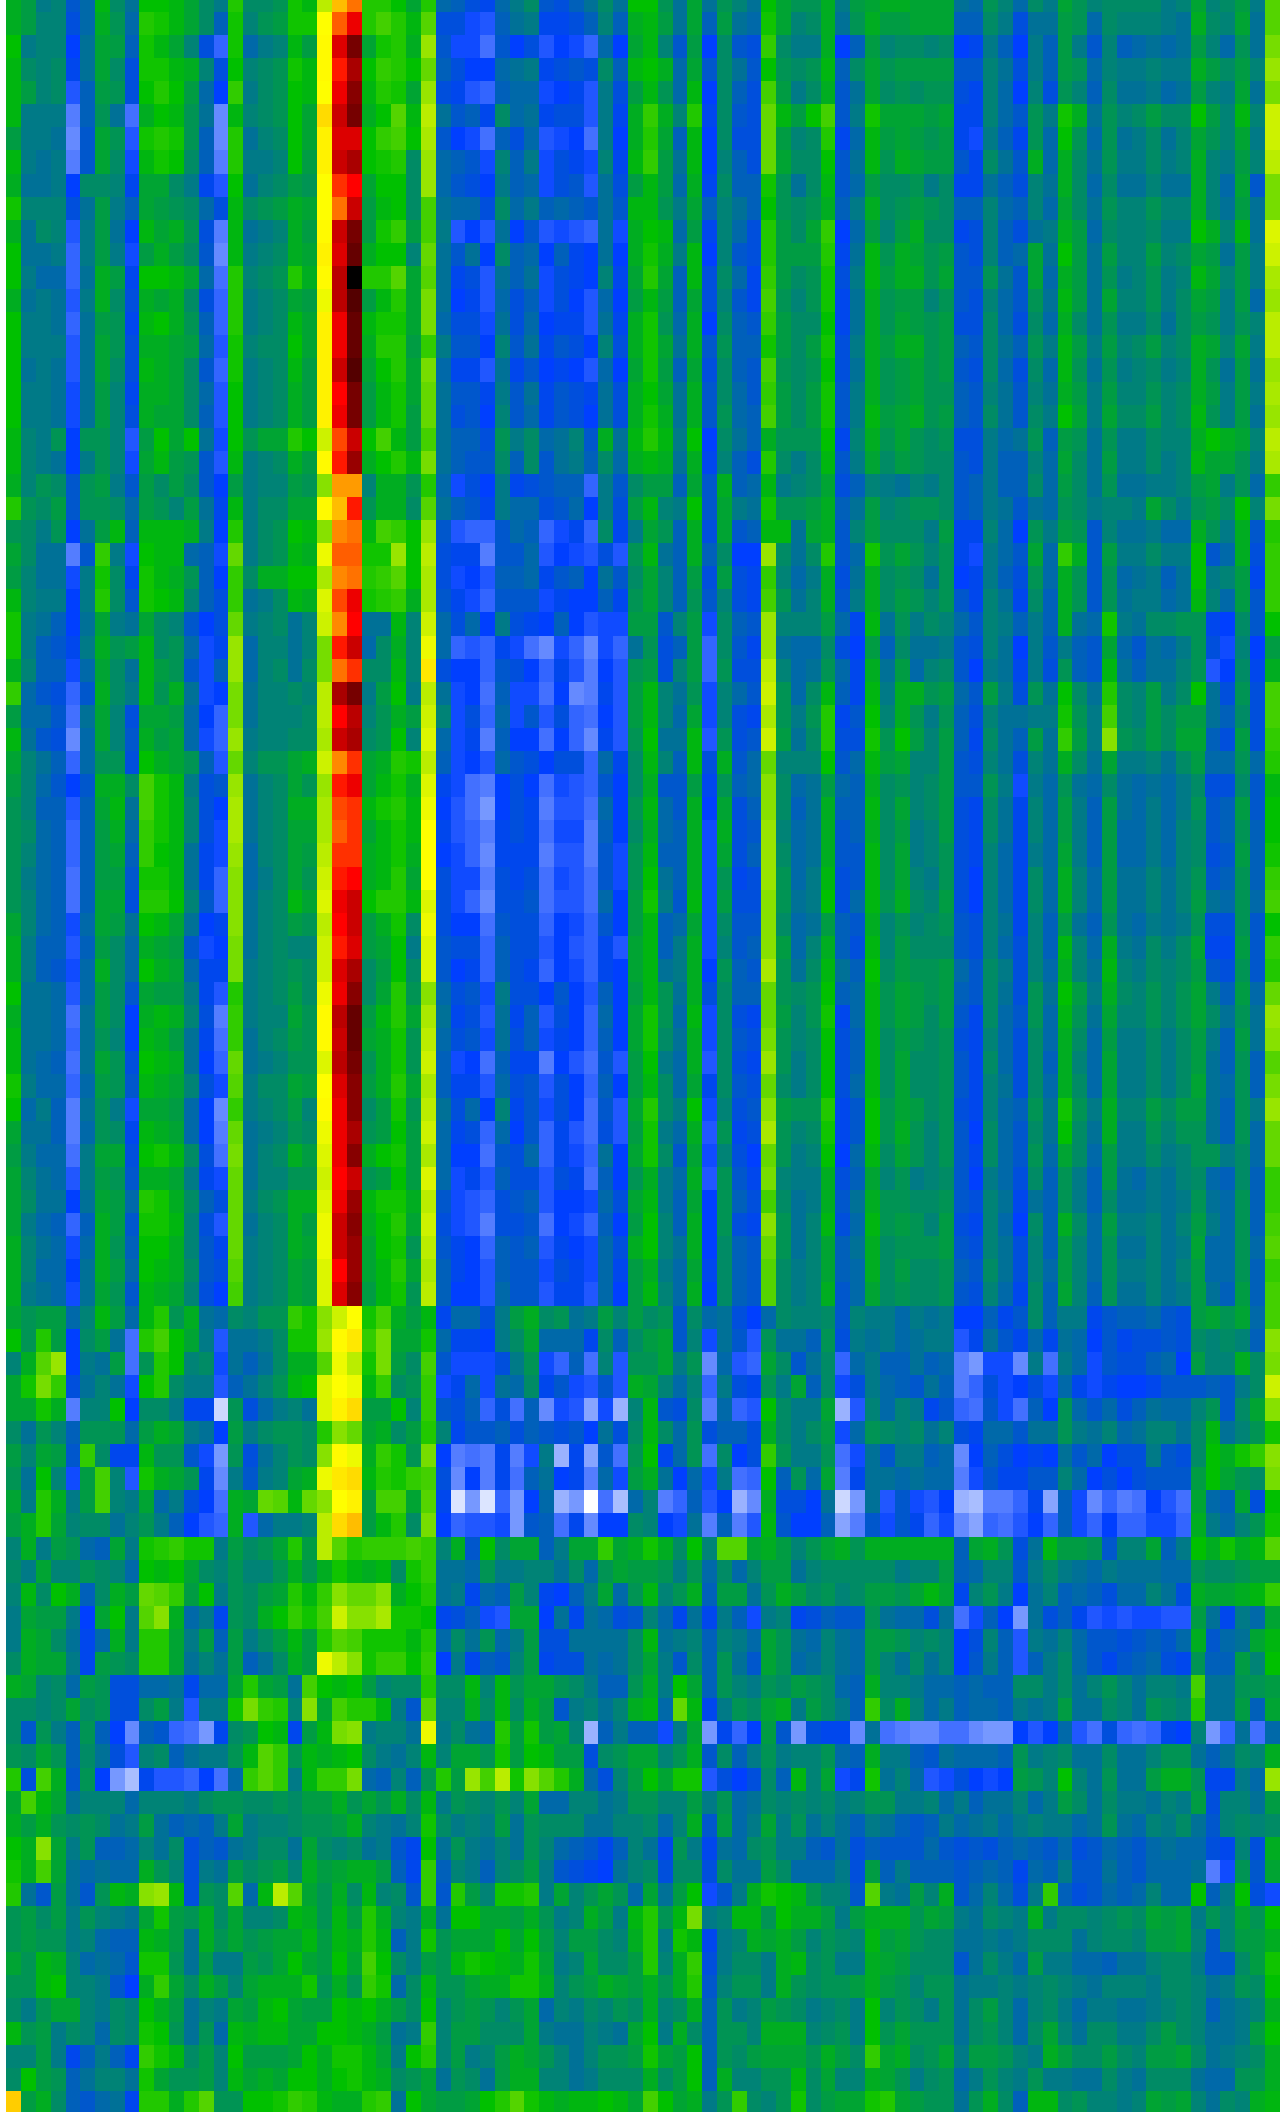

At2g29000  
At5g26080  
At4g29180  
At3g01730  
At2g25240  
At1g70460  
At1g23720  
At1g27740  
At1g14960  
At3g07490  
At4g00680  
At1g48930  
At5g61650  
At4g33730  
At1g12560  
At5g19780  
At1g62980  
At4g30320  
At5g24313  
At5g40860  
At4g25790  
At2g19410  
At1g59850  
At5g24140  
At1g62440  
At1g63600  
At1g34540  
At4g28850  
At1g34510  
At4g13390  
At5g35190  
At5g67400  
At3g62680  
At3g54580  
At3g60280  
At4g08410  
At5g06640  
At5g06630  
At2g24980  
At3g54590  
At1g54970  
At5g49080  
At5g57530  
At5g19800  
At5g05500  
At5g04960  
At4g25820  
At1g12040  
At1g30870  
At4g26010  
At4g02270  
At4g19680  
At4g25220  
At4g40090  
At5g57540  
At2g20520  
At5g22410  
At2g18640  
At3g56500  
At1g76930  
At4g25070  
At3g49940  
At3g56980  
At1g35720  
At1g20840  
At4g39090  
At5g58900  
At4g33770  
At5g29090  
At2g45120  
At3g25950  
At5g19270  
At3g15370  
At2g17940  
At5g18510  
At5g11770  
At2g23860  
At1g13460  
At5g29070  
At2g31910  
At5g61160  
At5g43410  
At3g42430  
At2g07693  
At2g10450  
At3g30846  
At1g47350  
At4g19910  
At4g11870  
At4g02190  
At2g07650  
At3g08750



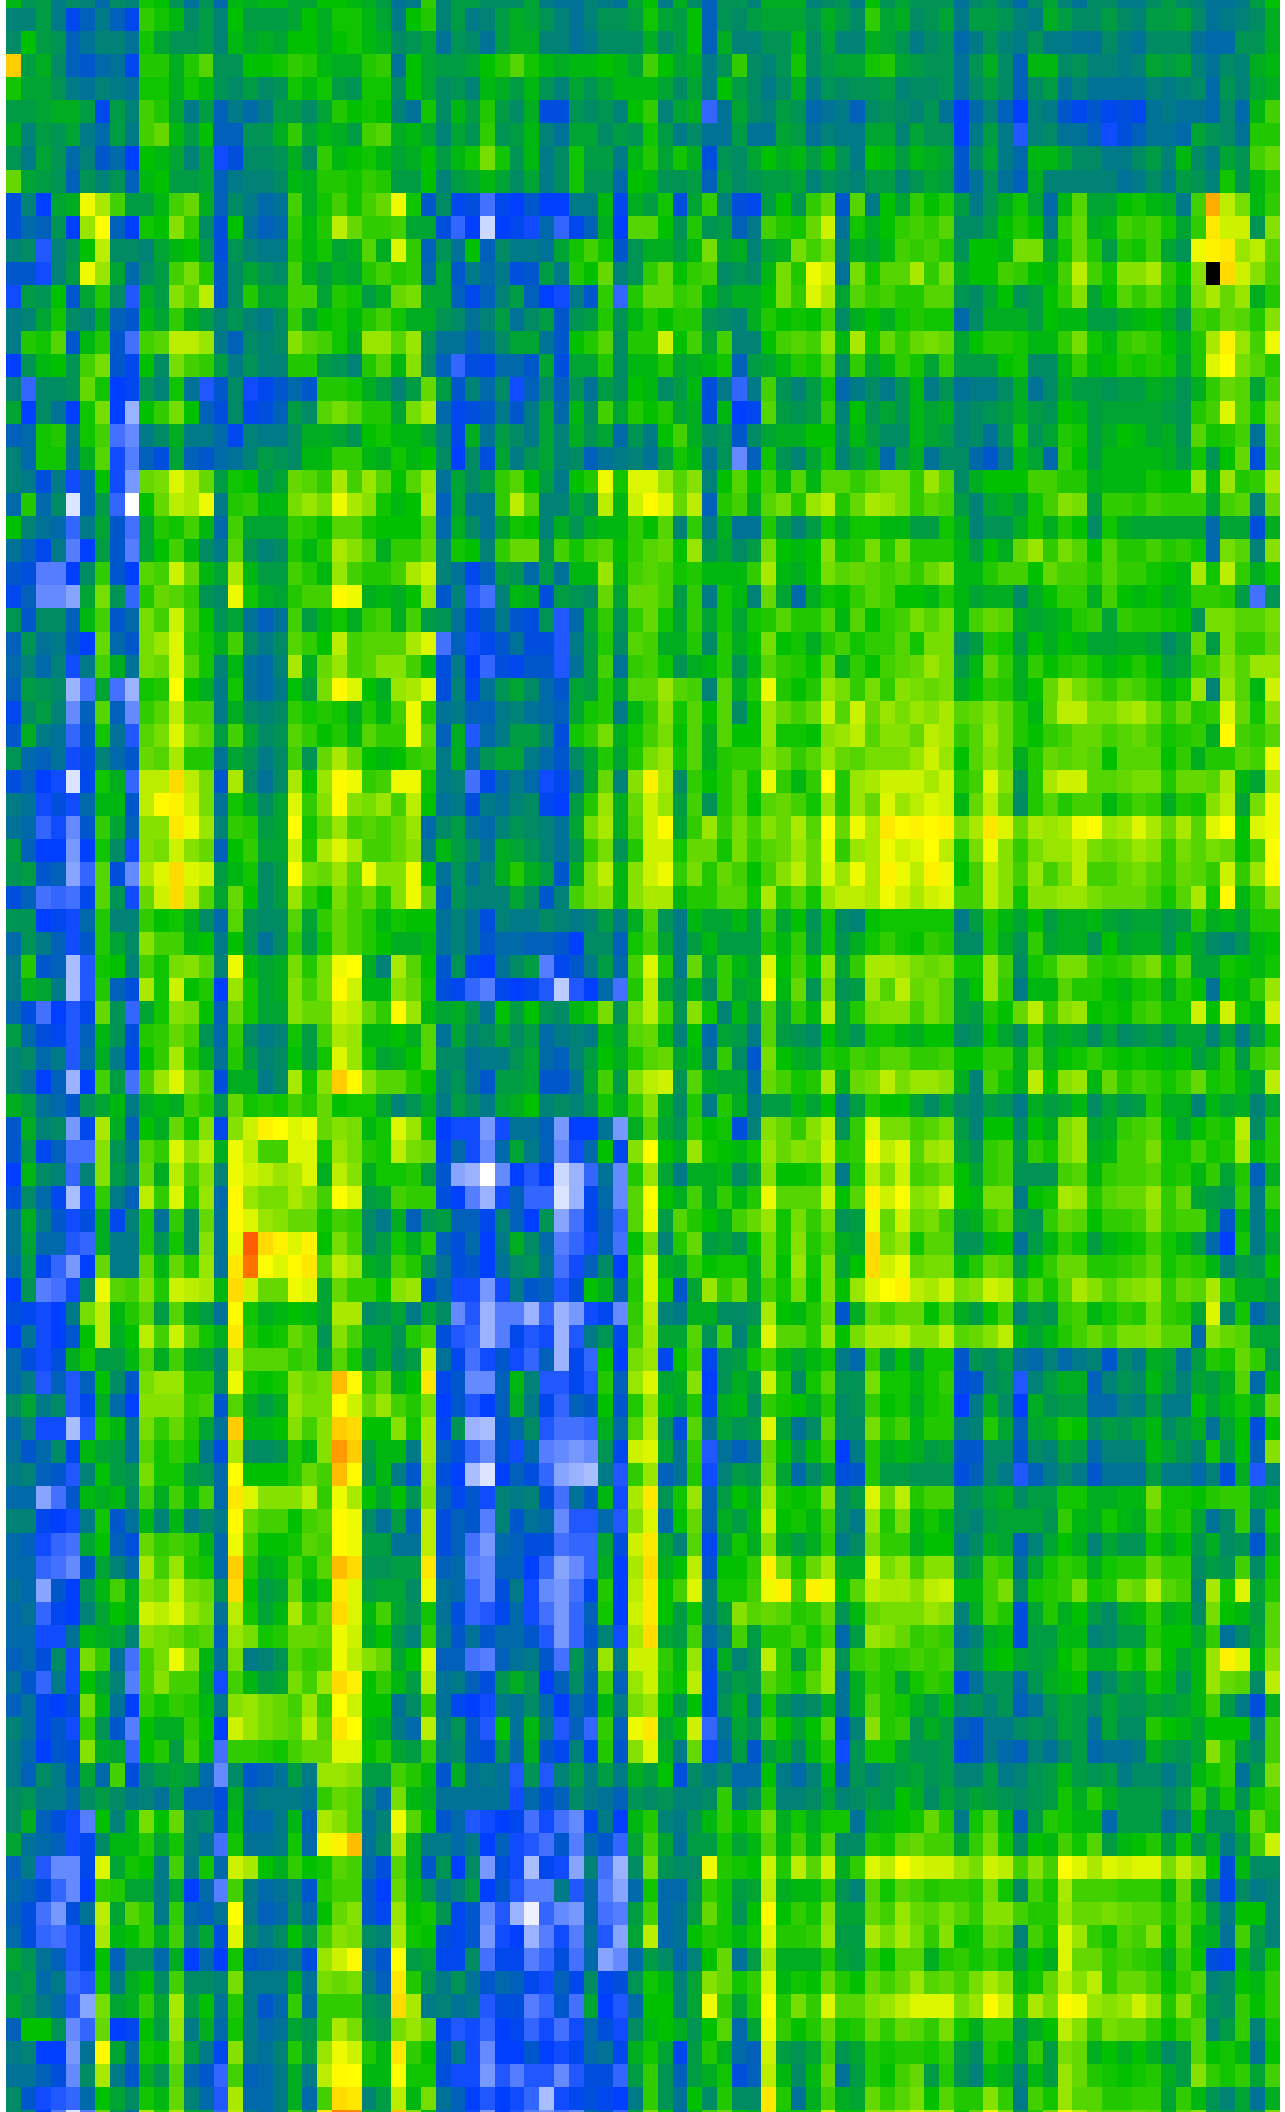

At4g02190  
At2g07650  
At3g08750  
At2g03460  
At2g35733  
At1g44930  
At2g46850  
At4g18450  
At5g09960  
At2g03680  
At1g19835  
At2g27960  
At1g15370  
At5g42660  
At3g07580  
At5g21070  
At3g61540  
At1g68100  
At5g24500  
At2g27600  
At2g35100  
At4g39220  
At4g31760  
At5g11490  
At5g37310  
At3g03070  
At5g10870  
At5g39500  
At1g25570  
At5g35160  
At4g26550  
At5g41950  
At1g20380  
At5g06660  
At5g07040  
At3g44940  
At5g50820  
At5g11040  
At1g10950  
At5g62380  
At5g57420  
At3g06060  
At1g14670  
At4g09630  
At4g10560  
At5g19100  
At4g15160  
At1g15900  
At5g44340  
At5g25100  
At2g47170  
At1g56330  
At4g09720  
At3g14790  
At5g65810  
At1g53290  
At2g28430  
At2g20930  
At5g57330  
At2g46505  
At3g01010  
At5g47030  
At4g22310  
At5g67590  
At1g01050  
At4g38510  
At1g72020  
At5g13450  
At2g44620  
At5g15320  
At3g62400  
At2g43350  
At2g02510  
At1g14450  
At4g32470  
At4g37830  
At1g21050  
At5g62920  
At1g41830  
At2g40150  
At1g10670  
At2g34590  
At5g50420  
At2g26640  
At3g14350  
At3g26700  
At5g12850  
At5g57460  
At1g64630  
At4g12880  
At5g23820

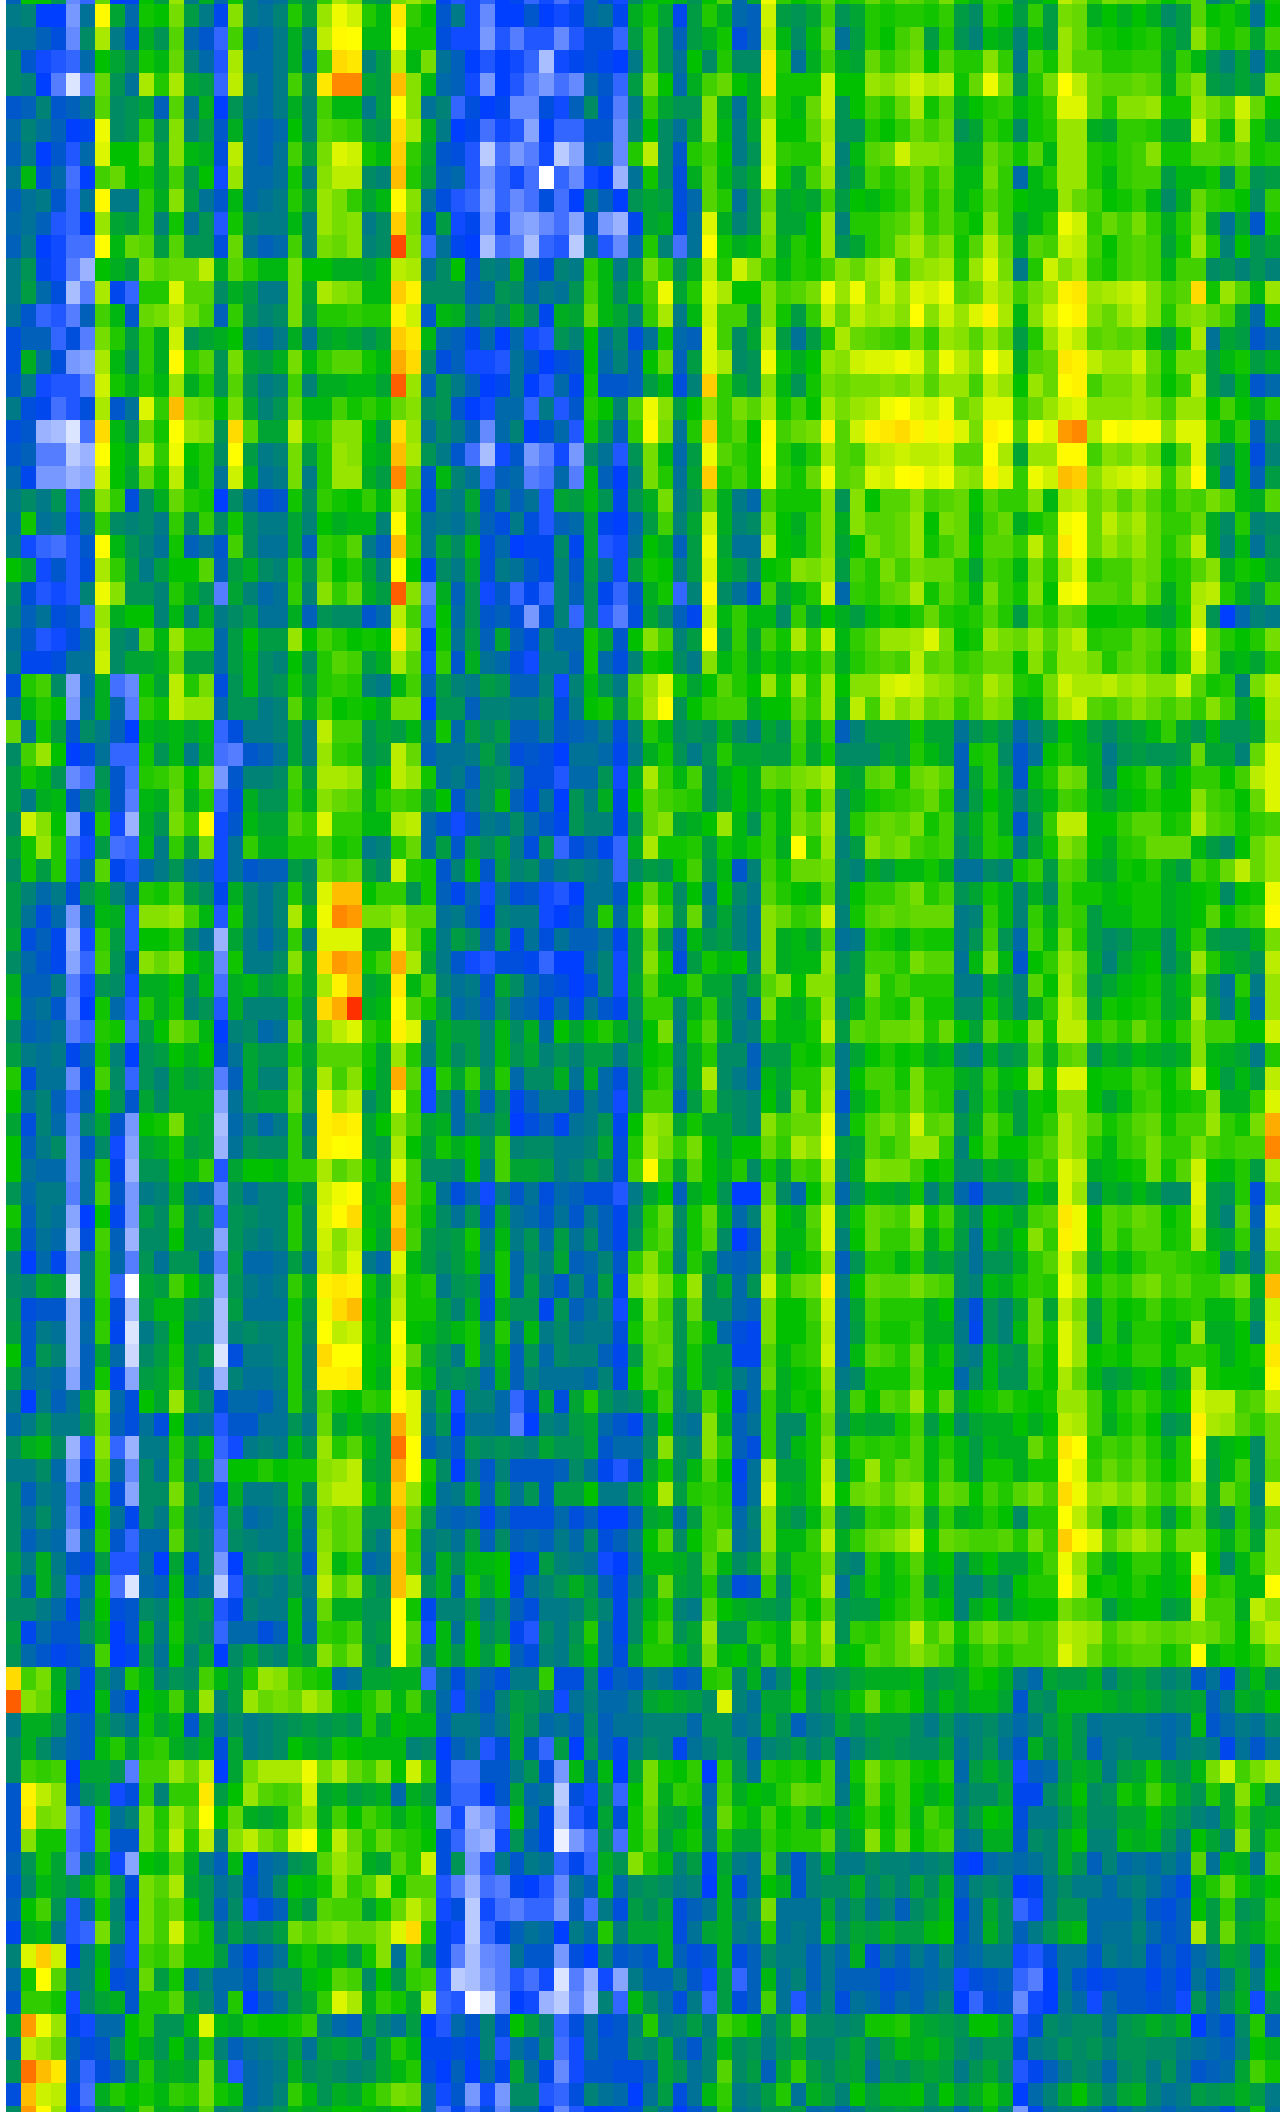

At1g64630  
At4g12880  
At5g23820  
At2g04780  
At4g12110  
At2g01070  
At4g18060  
At5g15350  
At3g07990  
At2g36830  
At1g75680  
At3g08910  
At5g14790  
At3g11600  
At3g26935  
At5g01460  
At1g64670  
At5g02410  
At4g28040  
At3g55360  
At5g10480  
At4g26610  
At2g31730  
At1g30570  
At3g23750  
At1g01620  
At1g01610  
At2g34150  
At1g05320  
At1g57620  
At2g31710  
At1g03660  
At1g59970  
At3g08630  
At4g25840  
At5g36290  
At3g23660  
At2g22125  
At4g12440  
At1g65180  
At2g45050  
At1g52910  
At5g44110  
At4g03330  
At2g25180  
At1g23760  
At4g26140  
At5g37660  
At4g08690  
At5g26660  
At5g40630  
At4g11190  
At1g18140  
At5g03150  
At1g55160  
At3g09300  
At3g02580  
At5g15150  
At3g26760  
At1g01200  
At3g09410  
At1g75500  
At1g16860  
At3g08930  
At3g26810  
At1g31710  
At1g31710  
At1g31070  
At5g60570  
At2g32990  
At3g15940  
At3g09710  
At1g12750  
At2g32930  
At3g43390  
At5g18290  
At1g73250  
At3g15710  
At3g24350  
At5g61240  
At2g30060  
At2g43940  
At1g07140  
At1g18580  
At1g11200  
At5g19980  
At1g27970  
At2g31010  
At5g28150  
At5g62070  
At2g22890

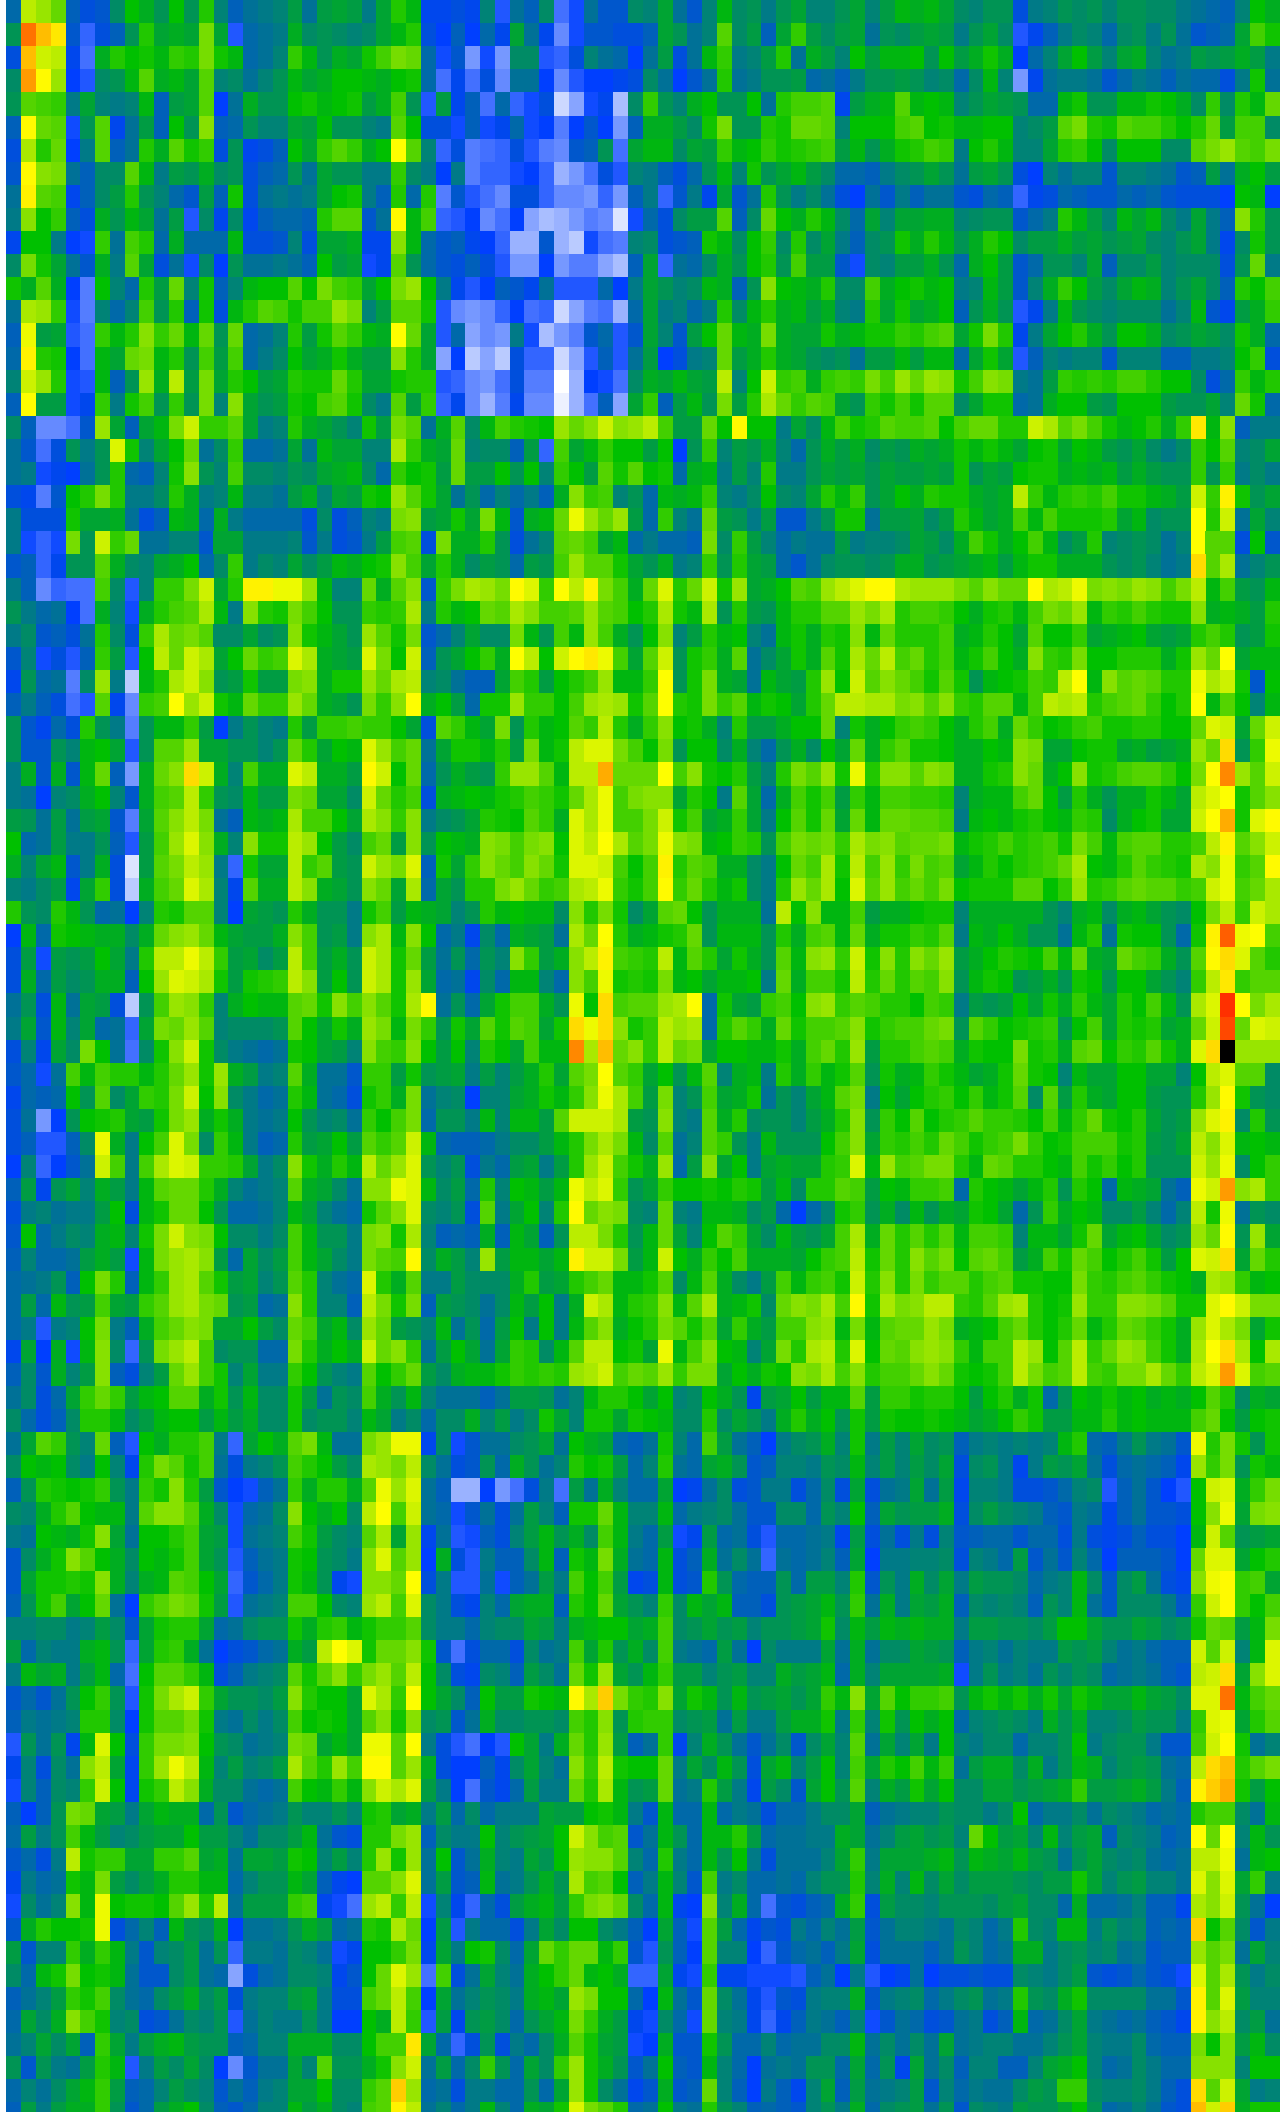

At5g28150  
At5g62070  
At2g22890  
At2g31010  
At1g07890  
At4g30996  
At4g40000  
At3g17390  
At1g76160  
At1g45688  
At1g29470  
At1g04430  
At2g38840  
At2g36880  
At4g37450  
At4g27720  
At4g00570  
At3g49720  
At5g62880  
At5g13090  
At1g02640  
At2g23460  
At2g01570  
At2g46710  
At1g28110  
At3g11760  
At4g27910  
At3g11640  
At1g13570  
At2g19340  
At3g19460  
At5g66440  
At1g13940  
At3g14910  
At1g72990  
At1g06490  
At3g08800  
At5g05310  
At1g53770  
At5g13880  
At2g01990  
At1g31460  
At2g45930  
At3g49310  
At5g65170  
At3g48750  
At1g19340  
At3g22425  
At5g54980  
At1g19430  
At2g26110  
At1g54200  
At4g10130  
At1g49830  
At4g00590  
At1g80420  
At2g17970  
At3g55390  
At2g40060  
At5g12370  
At1g54040  
At5g59990  
At5g07770  
At5g66660  
At1g24625  
At5g18370  
At4g03600  
At4g32270  
At2g40410  
At2g42390  
At4g32950  
At4g35040  
At1g80520  
At4g31150  
At5g46850  
At5g40190  
At1g78480  
At2g25310  
At5g45800  
At3g59010  
At2g33360  
At3g07550  
At2g24220  
At5g63410  
At1g68490  
At4g09580  
At4g17695  
At2g35760  
At2g05170  
At4g05060  
At3g49360  
At2g13090

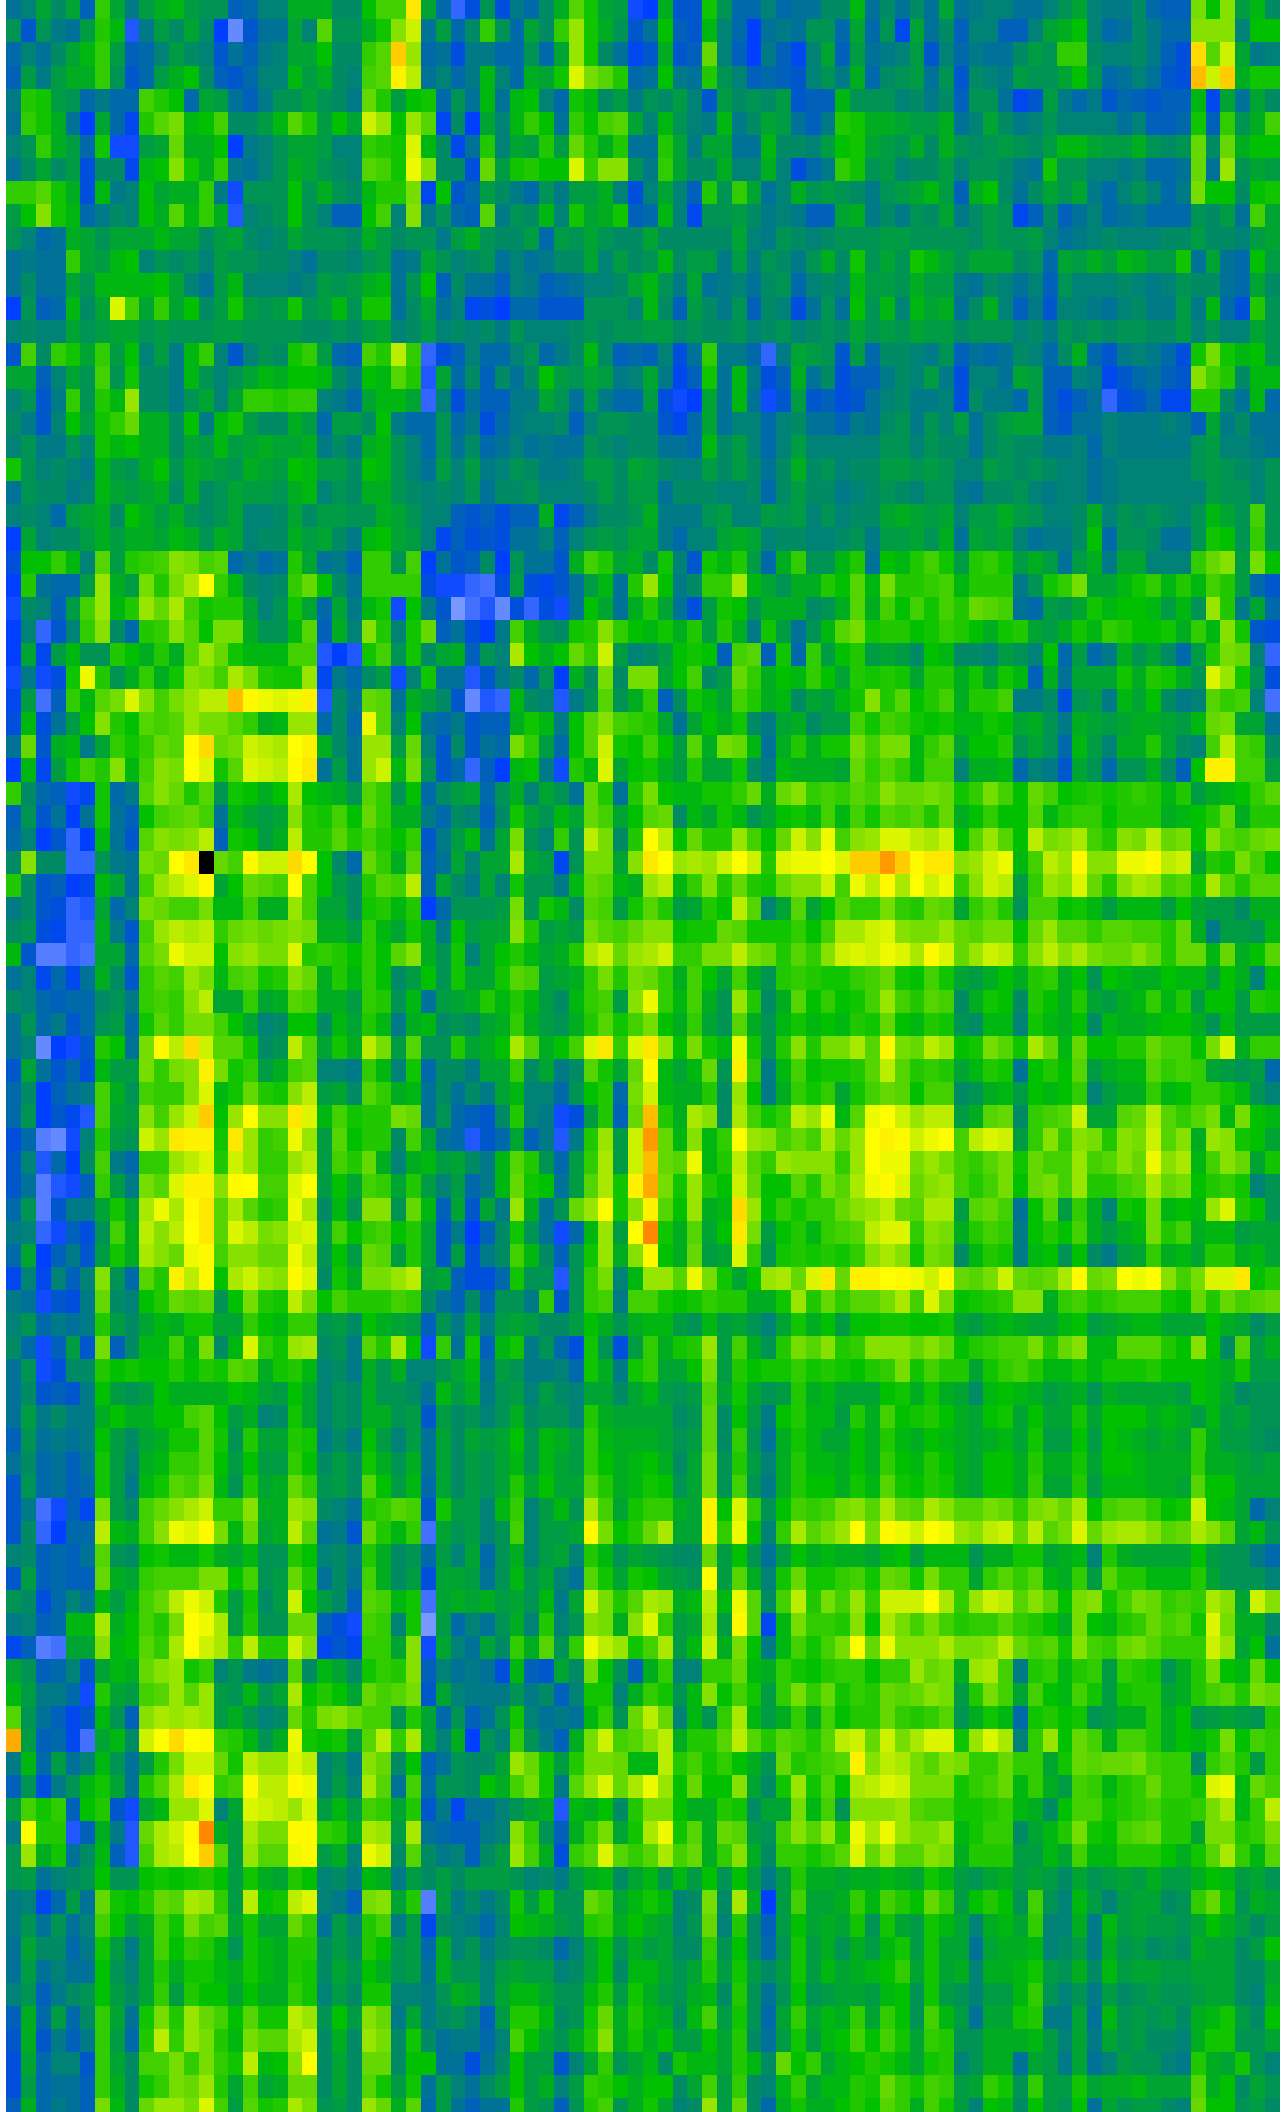

At2g05170  
At3g49360  
At3g13980  
At3g29140  
At5g13530  
At2g27900  
At5g51690  
At3g10960  
At4g10940  
At1g43260  
At1g34530  
At5g45570  
At3g42090  
At1g43840  
At4g32350  
At5g01930  
At4g33810  
At4g15040  
At3g17150  
At4g29285  
At5g58820  
At3g61920  
At4g21770  
At4g37820  
At3g11650  
At1g29040  
At3g56460  
At5g56910  
At3g57785  
At2g46580  
At1g16820  
At3g07400  
At1g78790  
At4g12840  
At1g30515  
At1g01225  
At1g77390  
At5g42330  
At4g13990  
At4g11400  
At5g49220  
At1g64030  
At5g03010  
At5g60080  
At4g14840  
At1g79790  
At4g24260  
At5g07720  
At2g35520  
At2g18770  
At4g09810  
At1g49700  
At3g23210  
At4g10820  
At5g18940  
At3g06410  
At1g17260  
At1g77260  
At1g07490  
At1g72110  
At5g24820  
At1g26710  
At5g49070  
At1g74550  
At4g39010  
At3g21310  
At5g11360  
At2g42410  
At1g65910  
At5g06480  
At4g24530  
At3g16280  
At4g36160  
At3g21620  
At1g09800  
At3g29100  
At3g05710  
At1g14260  
At5g07730  
At1g24000  
At5g38070  
At3g23130  
At5g58782  
At2g21655  
At1g52970  
At5g58400  
At4g22050  
At1g23690  
At1g08065  
At1g23420

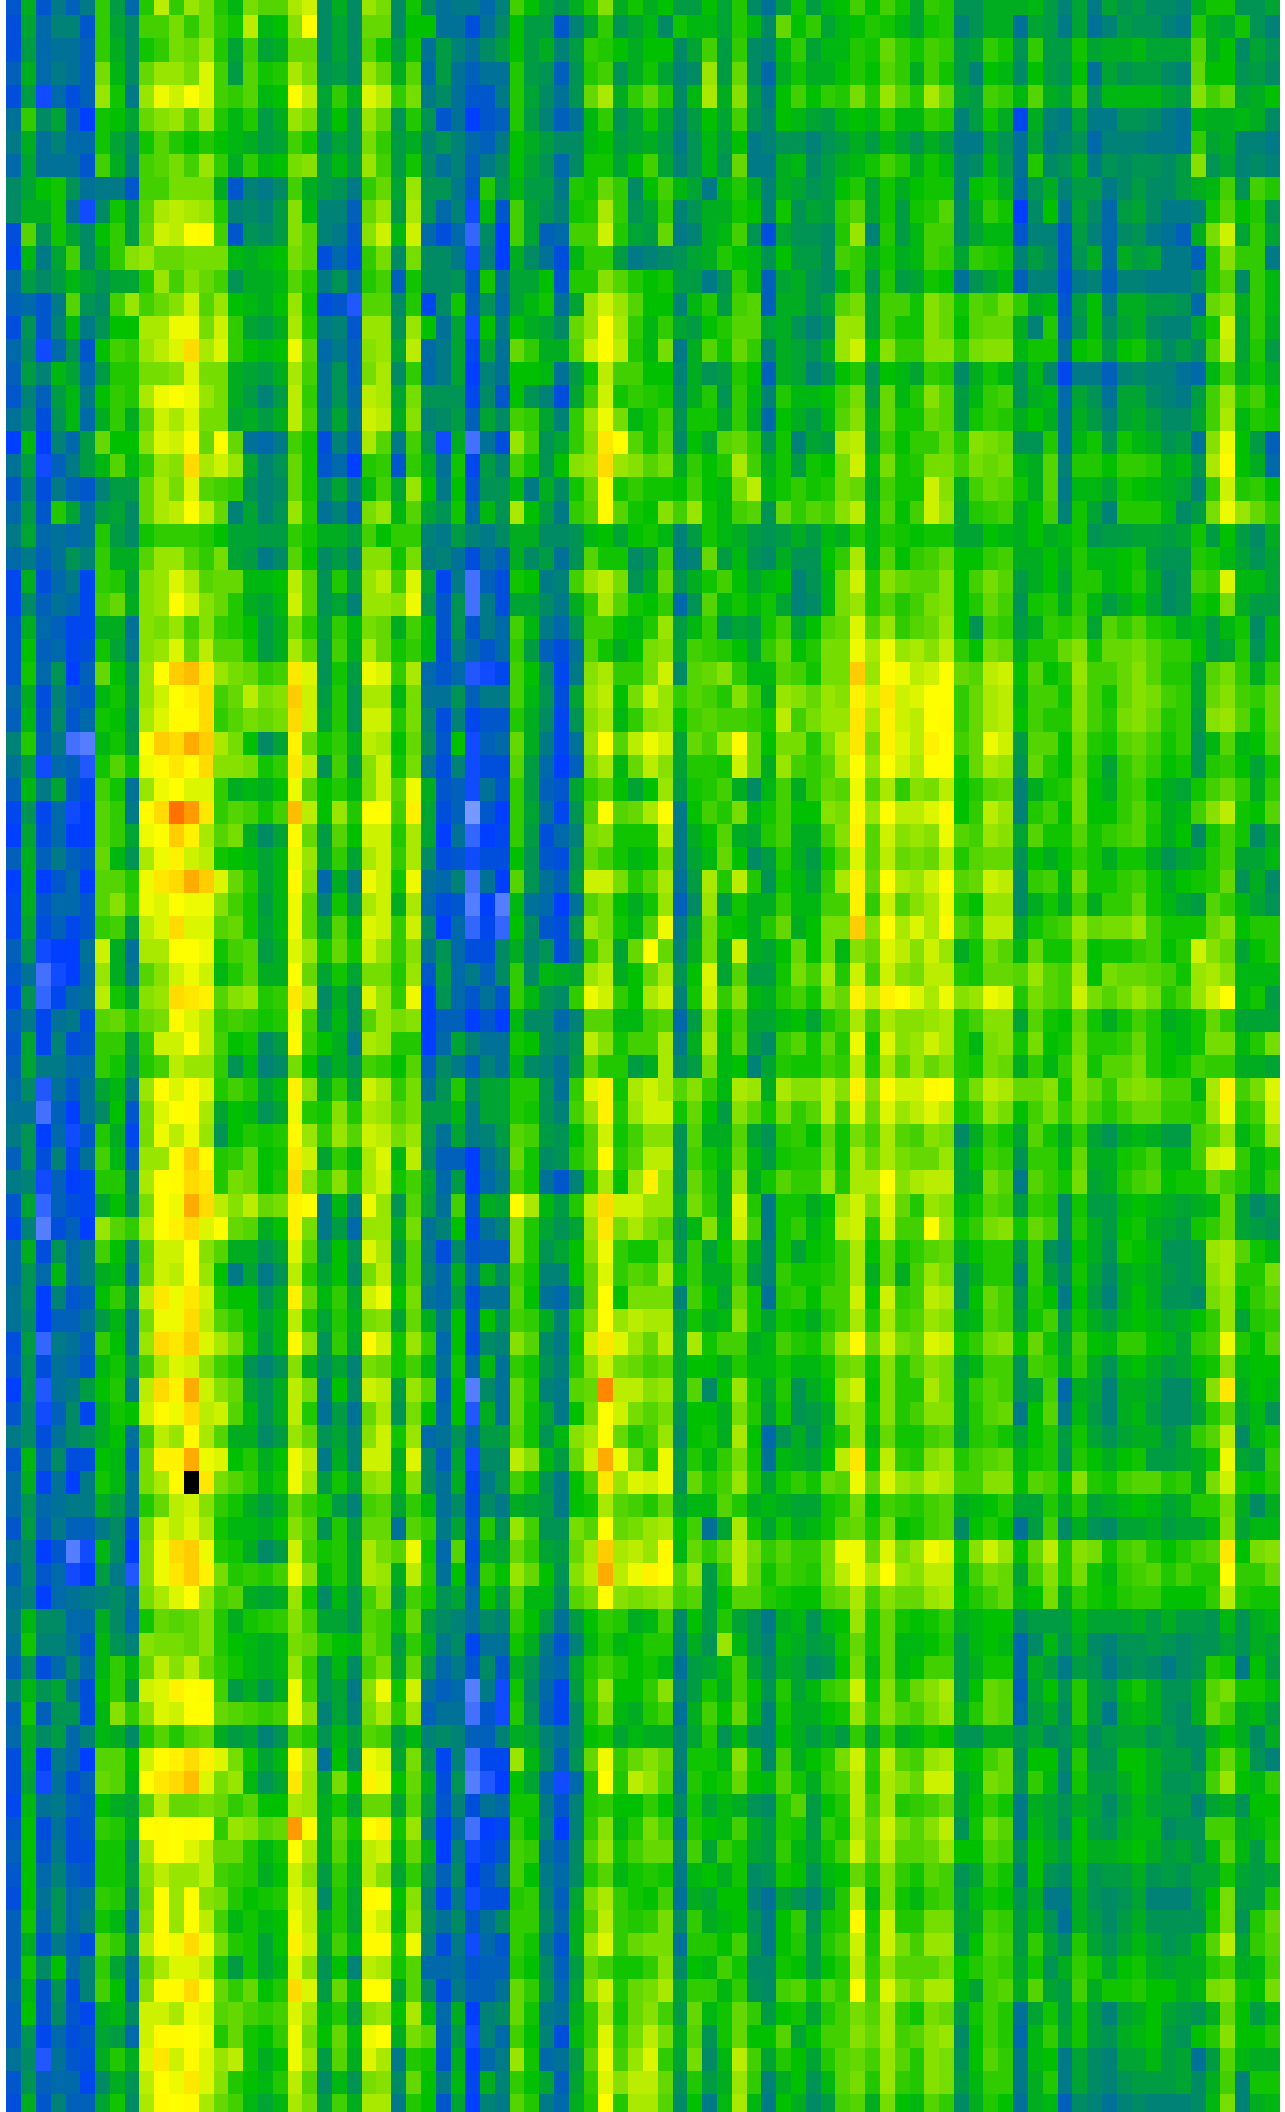

At4g22050  
At1g23690  
At1g08065  
At1g23420  
At5g18090  
At4g28090  
At1g25340  
At5g61320  
At2g36820  
At2g02740  
At3g03750  
At1g56710  
At1g53810  
At1g01740  
At5g19840  
At5g04050  
At4g19650  
At1g74170  
At4g16320  
At5g08320  
At4g37020  
At2g29580  
At1g68980  
At2g40440  
At3g62500  
At2g20100  
At2g20210  
At5g09780  
At3g12440  
At1g10710  
At3g20475  
At4g39380  
At2g31340  
At5g11430  
At5g18710  
At2g24310  
At3g29300  
At4g27550  
At3g62430  
At5g57720  
At2g17770  
At3g24360  
At4g16610  
At1g21840  
At2g28560  
At4g13600  
At4g26280  
At2g24960  
At4g20350  
At1g62700  
At2g34980  
At3g06600  
At1g77410  
At1g08840  
At2g07697  
At2g44170  
At5g35520  
At3g20740  
At5g23770  
At5g06400  
At5g13470  
At5g47455  
At1g73440  
At1g67210  
At1g14750  
At1g06140  
At2g15870  
At4g35930  
At1g52620  
At4g11690  
At4g08130  
At3g11350  
At1g51320  
At1g32375  
At5g64520  
At4g12920  
At5g52290  
At4g21880  
At2g01780  
At3g54060  
At1g01150  
At3g28470  
At1g65630  
At2g30380  
At3g13682  
At5g25960  
At3g05110  
At2g24000  
At2g39620  
At3g28670  
At1g25360  
At2g47570

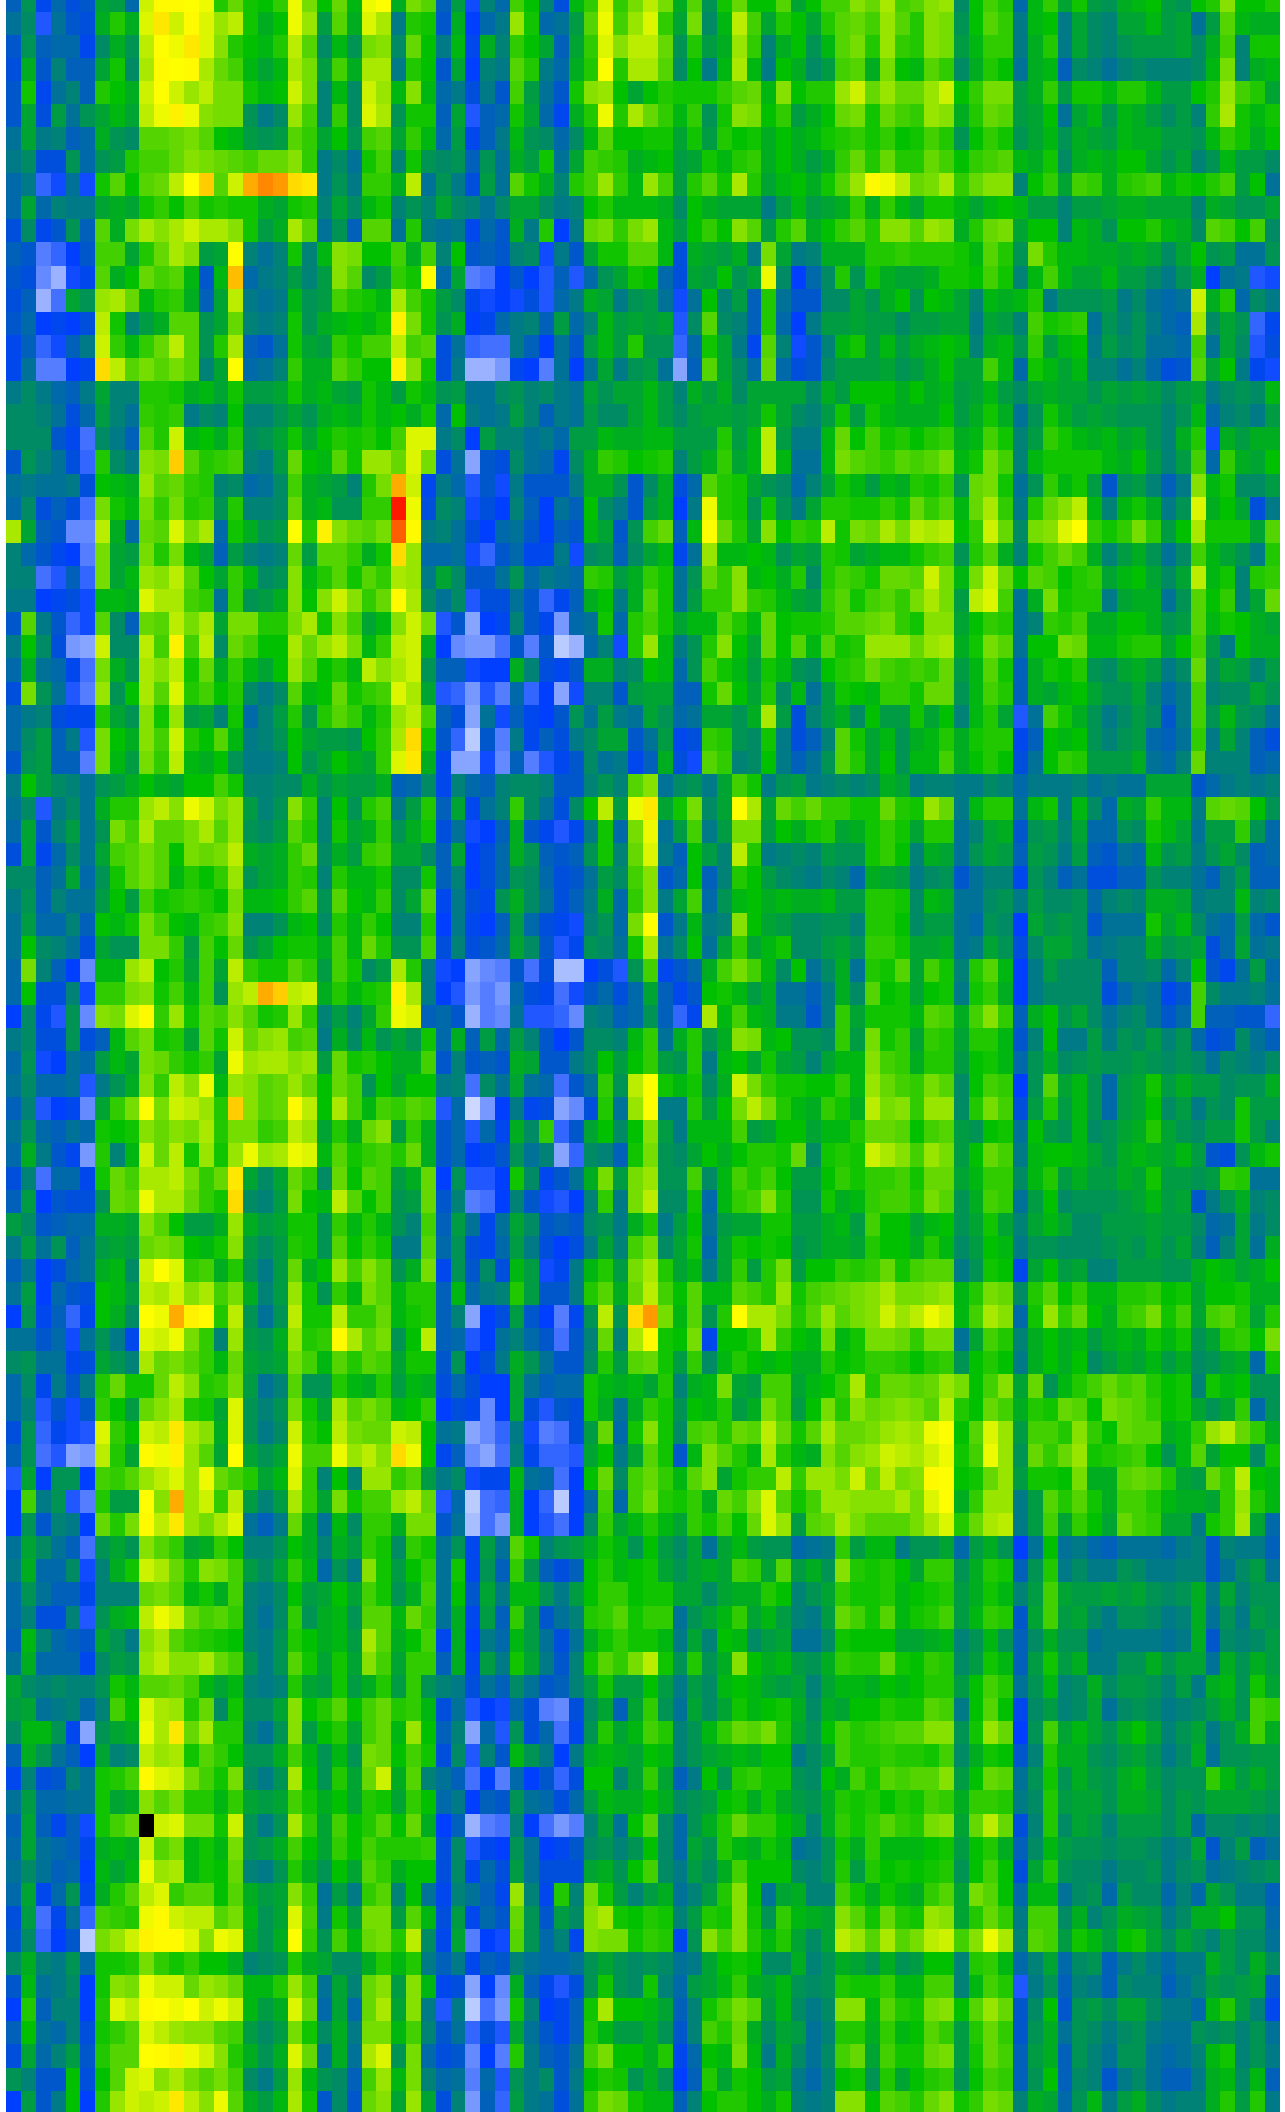

At2g39320  
At3g28670  
At1g25360  
At2g47570  
At1g60930  
At2g39680  
At3g44570  
At3g22690  
At5g56450  
At2g46375  
At2g18245  
At3g09780  
At3g14220  
At1g68130  
At2g37640  
At4g36970  
At2g47930  
At5g04630  
At1g35200  
At3g08960  
At3g27325  
At4g16750  
At2g21140  
At2g46780  
At2g20750  
At3g03690  
At5g15900  
At5g18280  
At5g05820  
At5g28280  
At1g34550  
At2g40316  
At1g80000  
At1g09020  
At2g04840  
At1g77655  
At1g32660  
At3g30730  
At1g06810  
At1g31620  
At4g23580  
At3g26390  
At3g23810  
At5g03760  
At2g40475  
At5g23480  
At5g42110  
At5g63220  
At5g20980  
At4g23000  
At5g47490  
At5g47360  
At5g60340  
At2g05020  
At2g14670  
At3g01130  
At5g47170  
At5g63150  
At3g21465  
At5g59860  
At3g57130  
At4g25750  
At3g45230  
At4g18670  
At2g14050  
At4g01220  
At2g02590  
At2g35075  
At5g57570  
At4g20770  
At2g36980  
At1g24390  
At1g65130  
At3g16600  
At3g24780  
At2g31340  
At1g17630  
At5g27110  
At2g07455  
At5g10440  
At2g36040  
At1g49015  
At3g13540  
At4g14730  
At3g49650  
At2g14380  
At5g58080  
At5g06430  
At5g17830  
At1g55550  
At4g25270  
At4g38760

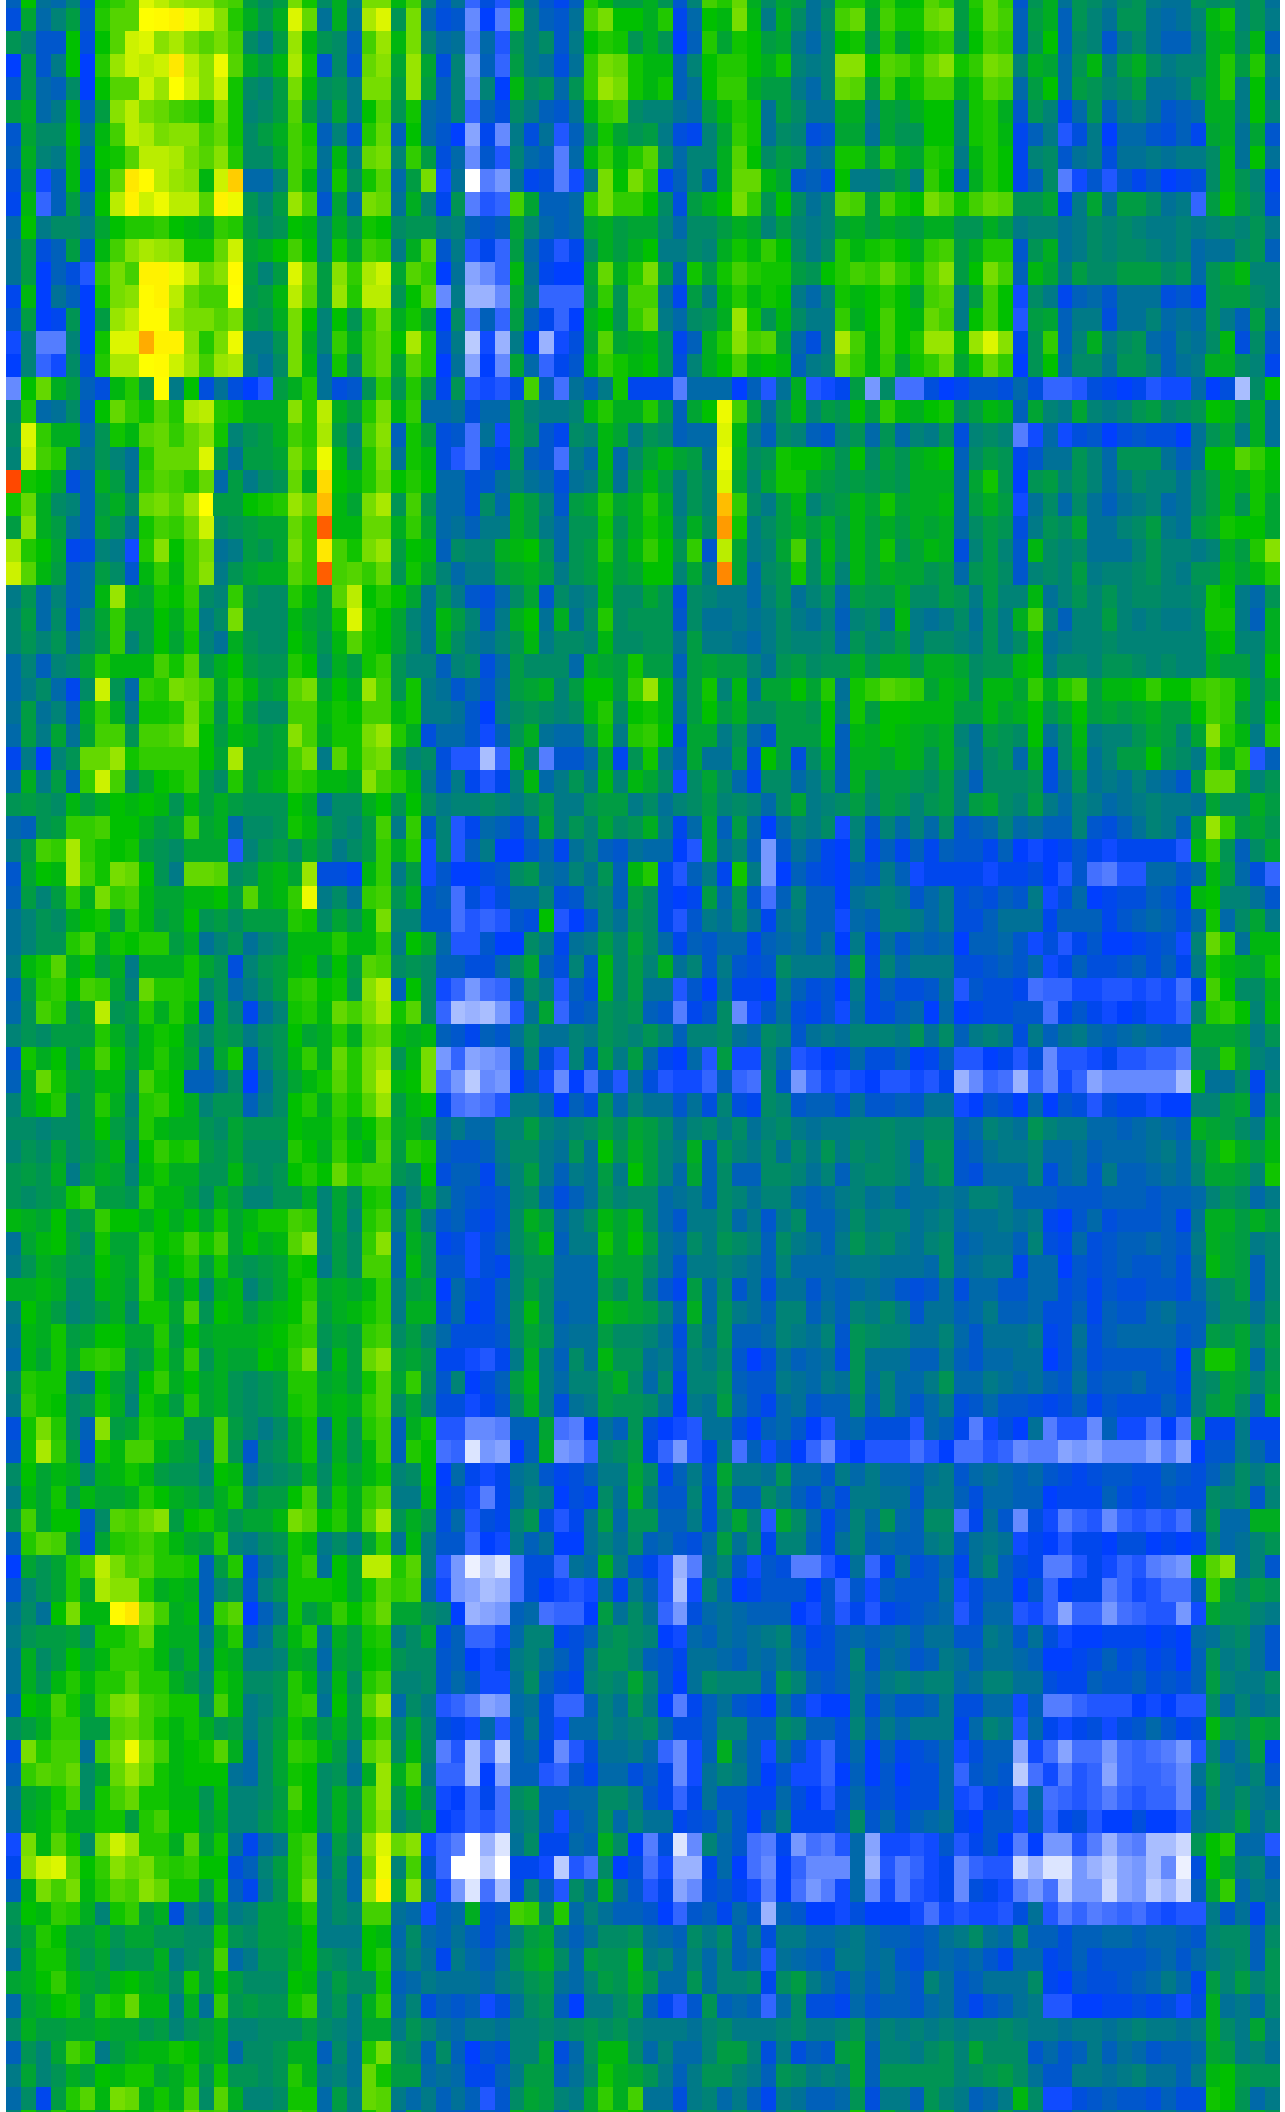

At1g55550  
At4g25270  
At4g38760  
At1g30010  
At5g02460  
At1g37057  
At5g45640  
At1g31500  
At3g55080  
At1g14110  
At3g63370  
At1g60460  
At1g79960  
At1g02830  
At1g12020  
At3g09860  
At1g33850  
At1g66110  
At4g04480  
At3g06890  
At1g44830  
At2g27320  
At1g20520  
At4g17785  
At2g37810  
At1g29090  
At2g18490  
At2g41850  
At4g37950  
At5g20030  
At2g04380  
At3g24270  
At3g20060  
At4g38820  
At1g44222  
At4g22600  
At5g26720  
At1g19510  
At3g28960  
At5g61290  
At1g31190  
At4g00960  
At1g52800  
At1g22540  
At4g05510  
At3g08660  
At5g12160  
At1g48220  
At4g07550  
At3g05310  
At4g32220  
At5g52770  
At1g08080  
At5g48550  
At2g04330  
At1g33813  
At4g19780  
At2g07520  
At5g06170  
At2g20805  
At2g15360  
At5g39760  
At2g32390  
At2g17160  
At3g51760  
At4g08230  
At2g37720  
At3g61460  
At4g39770  
At3g56840  
At5g25990  
At2g38350  
At5g51900  
At4g20200  
At4g19740  
At2g22810  
At4g11770  
At2g06840  
At1g33950  
At1g53210  
At2g30270  
At1g12220  
At4g05320  
At3g60430  
At5g27480  
At1g19040  
At5g58830  
At5g22380  
At1g56650  
At4g03060  
At5g04440

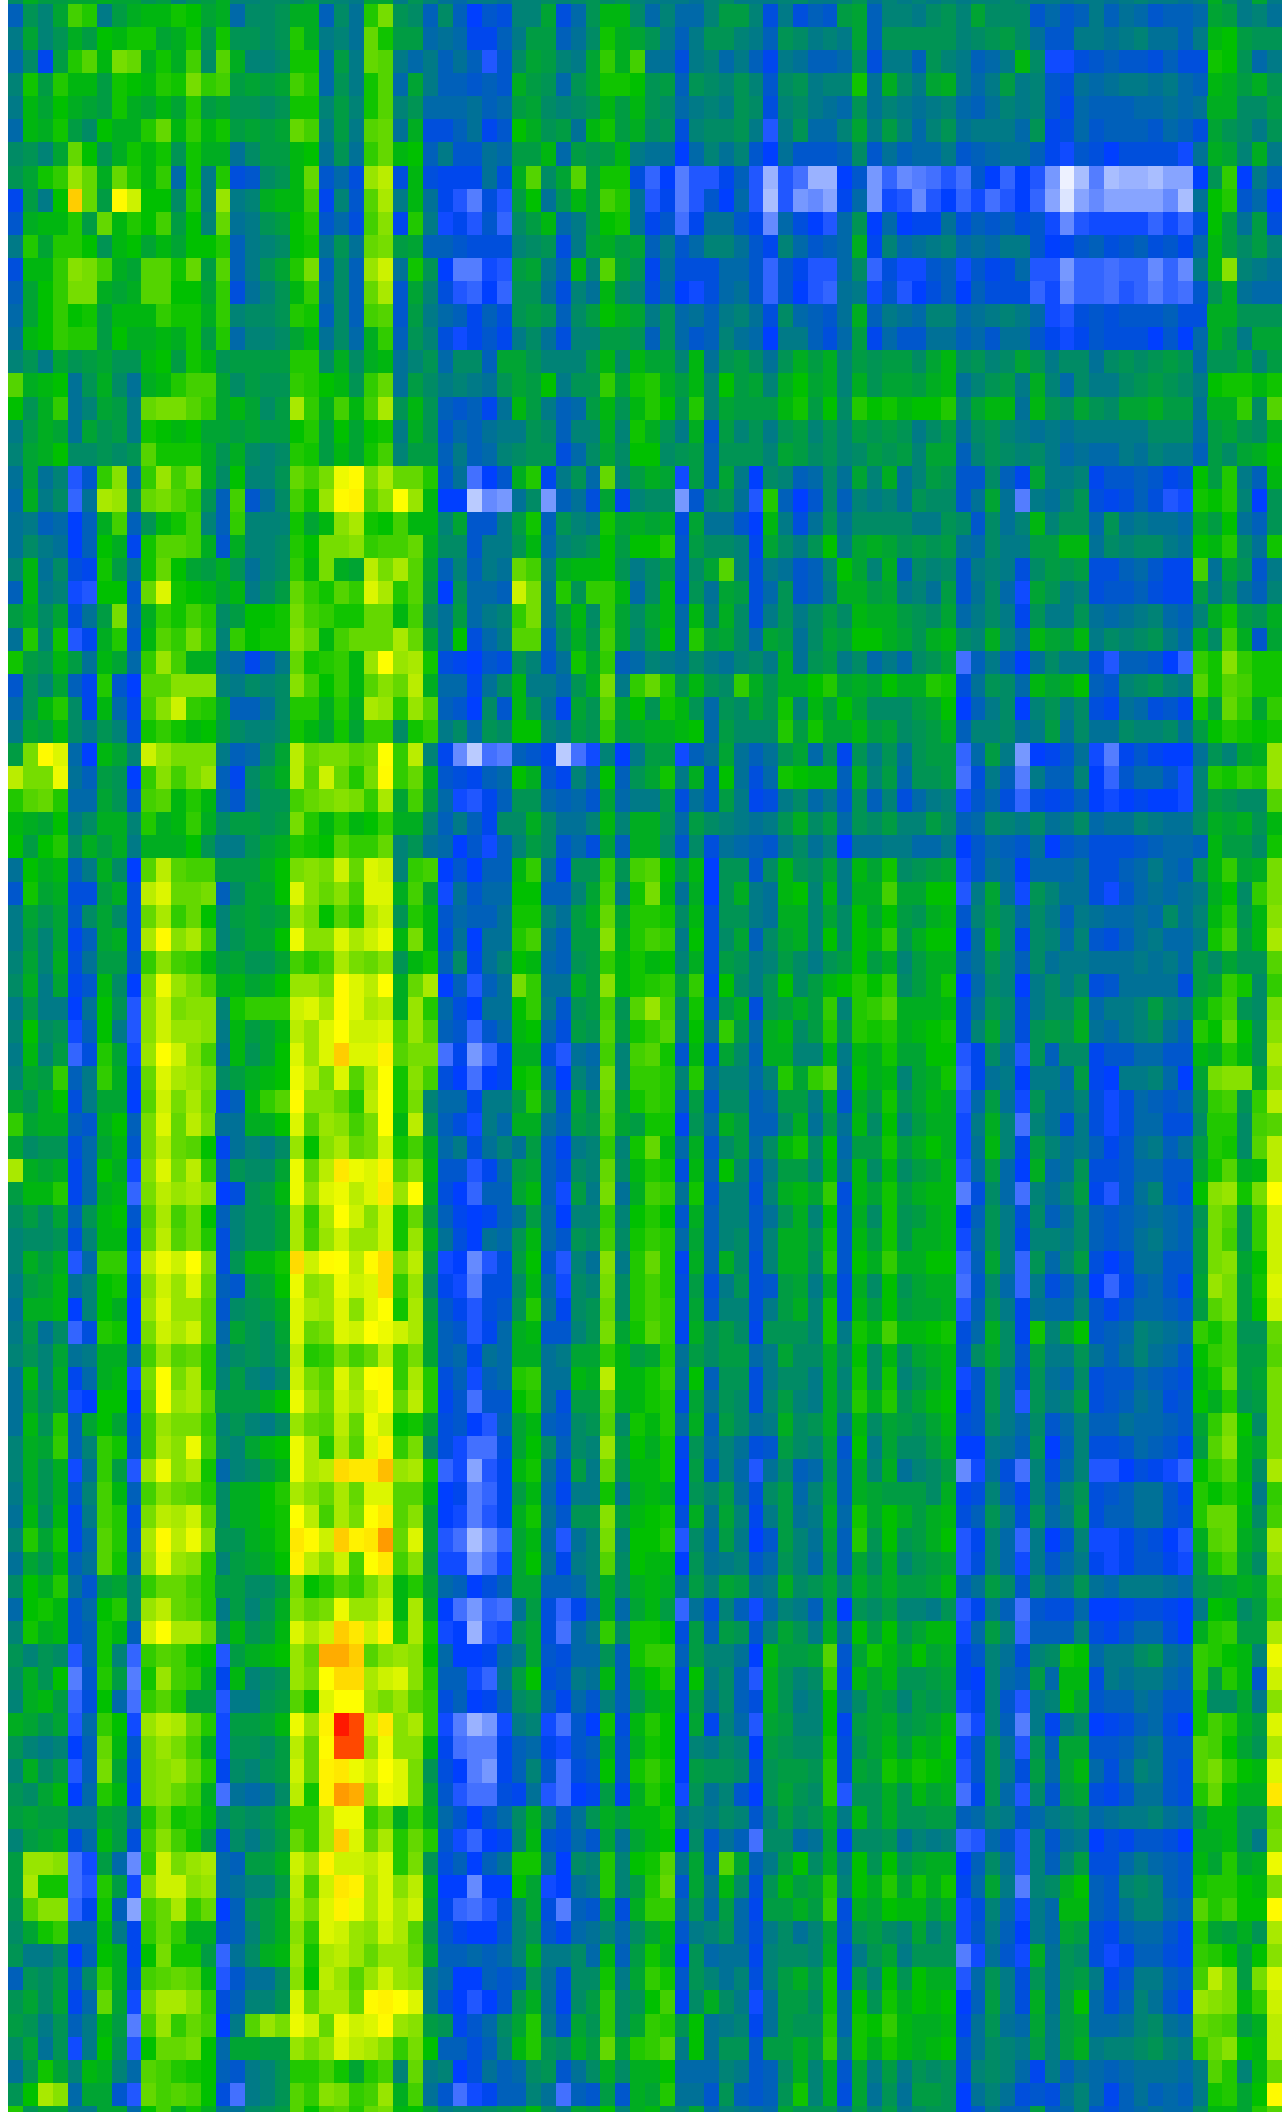

At1g56650  
At4g03060  
At5g04440  
At4g16090  
At1g47790  
At2g06020  
At5g62040  
At5g38850  
At1g05690  
At1g77960  
At1g18710  
At3g07520  
At3g24900  
At2g05430  
At2g30760  
At5g11220  
At5g35380  
At2g02060  
At1g48730  
At2g26050  
At4g39070  
At1g05810  
At1g73120  
At1g07690  
At1g74650  
At1g15050  
At1g15040  
At1g72070  
At1g10160  
At4g38510  
At5g53480  
At5g30450  
At3g49370  
At4g26890  
At2g42980  
At5g48750  
At5g18350  
At2g43220  
At5g17960  
At1g53970  
At5g55770  
At1g62090  
At3g51570  
At1g64480  
At4g09130  
At2g17330  
At5g36870  
At3g44700  
At3g01900  
At3g49630  
At2g35990  
At5g59940  
At5g44900  
At3g46710  
At1g06930  
At1g72870  
At3g45390  
At4g35660  
At2g10760  
At5g49750  
At3g18840  
At3g05080  
At2g21610  
At2g17590  
At2g22750  
At1g34545  
At3g46760  
At1g26700  
At2g07290  
At1g63580  
At3g46340  
At4g30420  
At1g18290  
At3g50130  
At1g55290  
At1g75620  
At5g22870  
At2g15300  
At4g12360  
At3g29635  
At5g41680  
At4g23070  
At3g11320  
At5g26930  
At3g49070  
At3g24110  
At5g11990  
At2g47810  
At5g58360  
At1g33840  
At2g34940



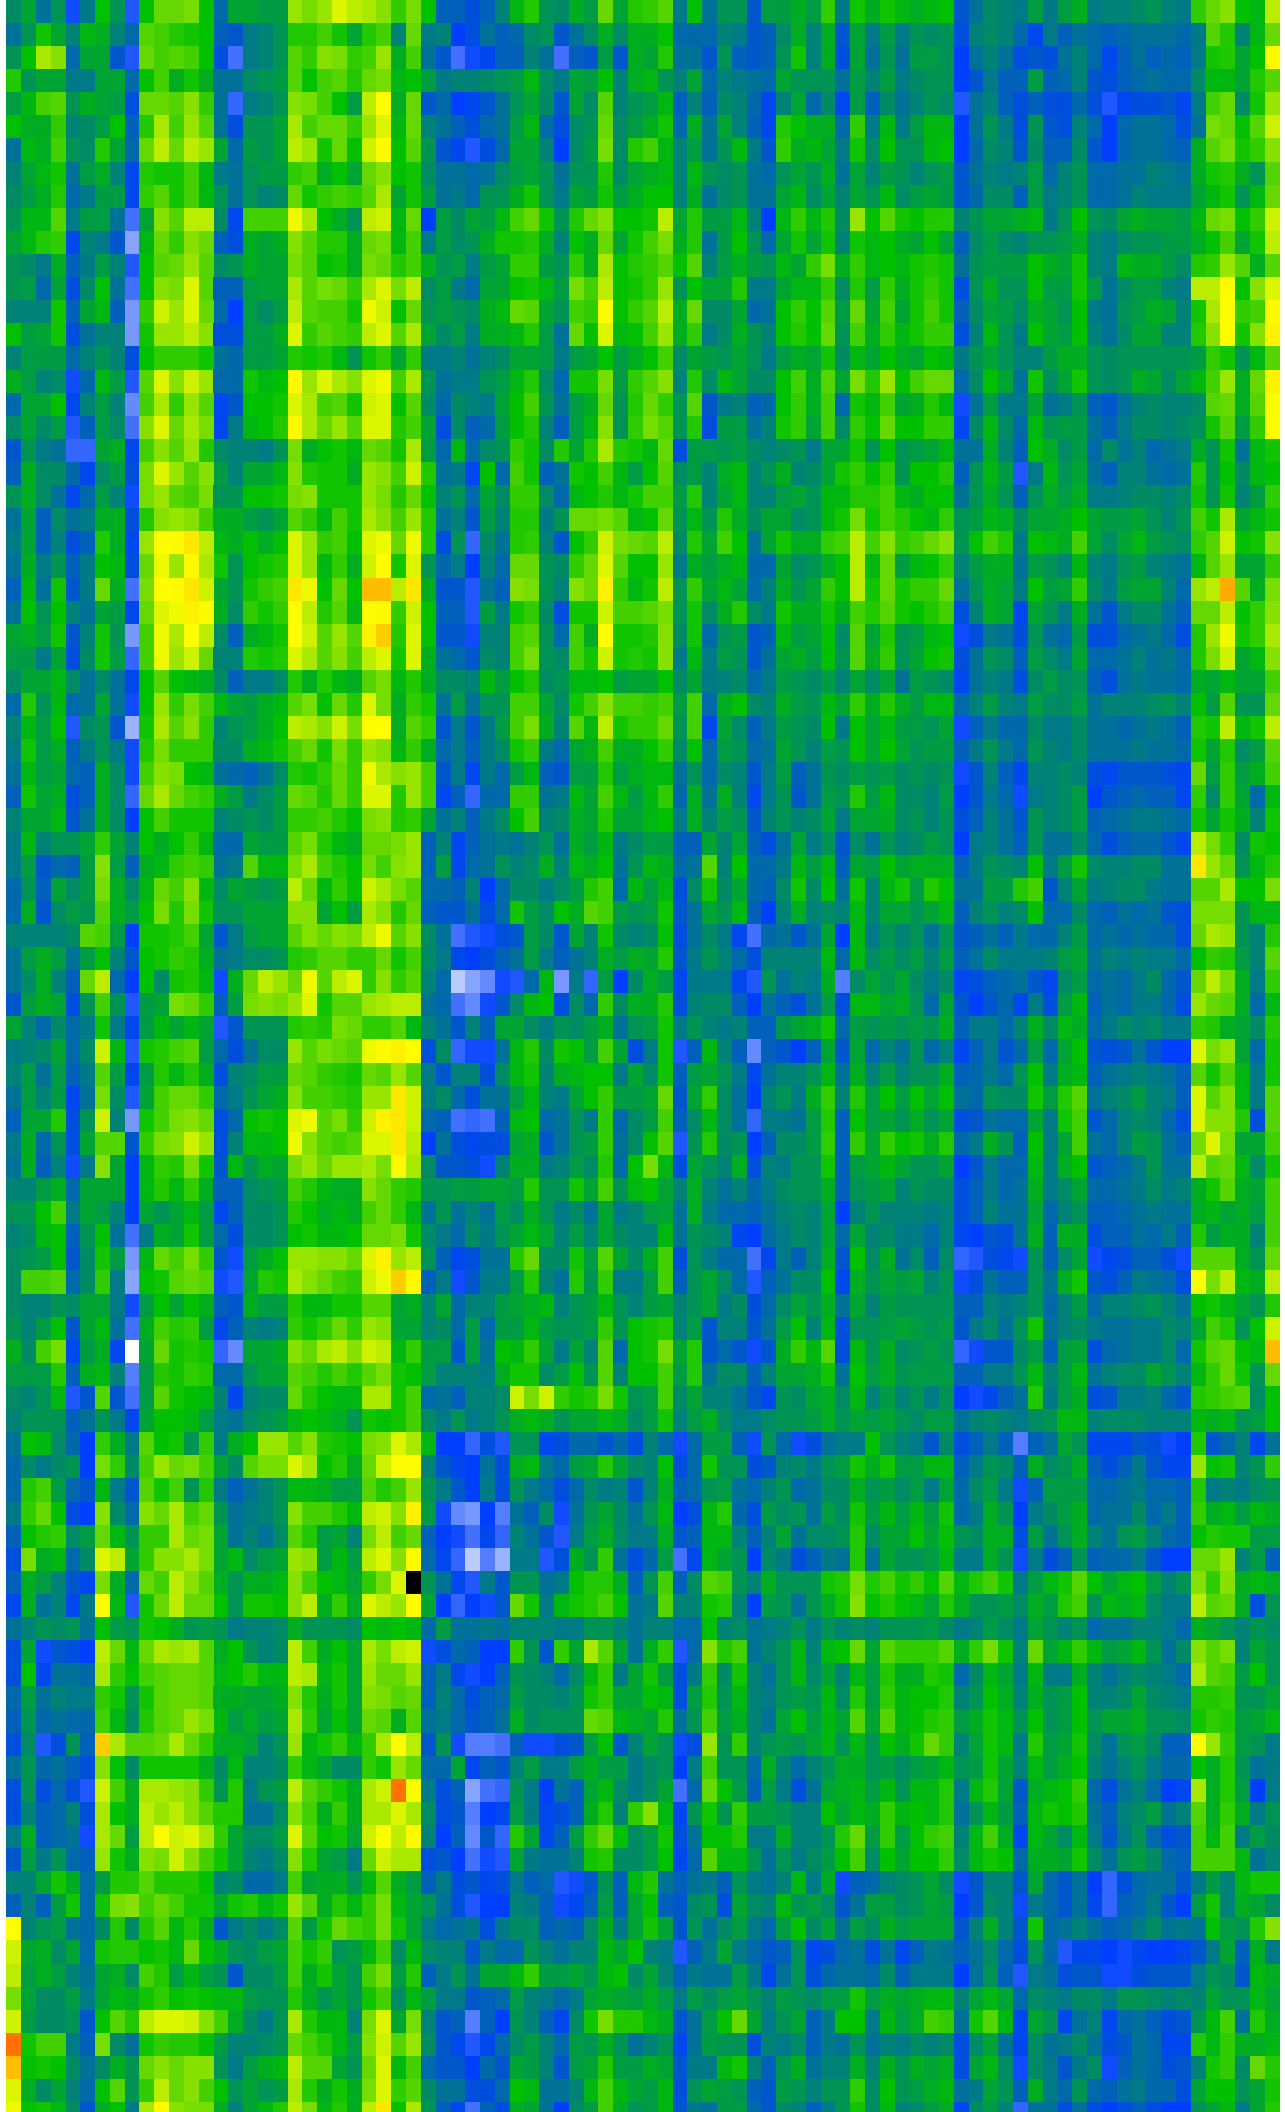

At5g58360  
At1g33840  
At2g34940  
At5g06080  
At1g17240  
At2g27390  
At4g35120  
At4g01340  
At4g17590  
At4g08890  
At5g39930  
At1g69470  
At1g63520  
At5g45370  
At1g79710  
At3g29110  
At5g18560  
At4g27850  
At5g24900  
At5g65830  
At1g29650  
At1g02550  
At1g35750  
At3g45440  
At5g07930  
At4g00840  
At3g44770  
At2g34990  
At1g57670  
At2g17600  
At4g28810  
At5g59760  
At3g20950  
At3g20900  
At3g04900  
At4g05310  
At1g31720  
At5g16490  
At3g56590  
At1g16490  
At5g28010  
At1g19390  
At4g32530  
At5g59300  
At5g47530  
At3g02290  
At1g09540  
At2g18970  
At1g57760  
At2g23690  
At5g06930  
At2g19960  
At4g18000  
At5g33380  
At5g51420  
At1g10720  
At3g52820  
At5g56620  
At5g54140  
At5g58180  
At1g07420  
At1g63560  
At3g13965  
At3g15470  
At4g18420  
At5g07620  
At5g56880  
At1g21830  
At4g28980  
At1g79975  
At2g20595  
At3g22070  
At1g66810  
At4g36650  
At5g14980  
At2g17300  
At5g54190  
At2g25220  
At1g23980  
At5g52420  
At4g09480  
At5g32470  
At1g78530  
At4g28110  
At5g47435  
At3g26350  
At2g05000  
At1g19025  
At5g64813  
At5g03270  
At5g35900  
At5g62740

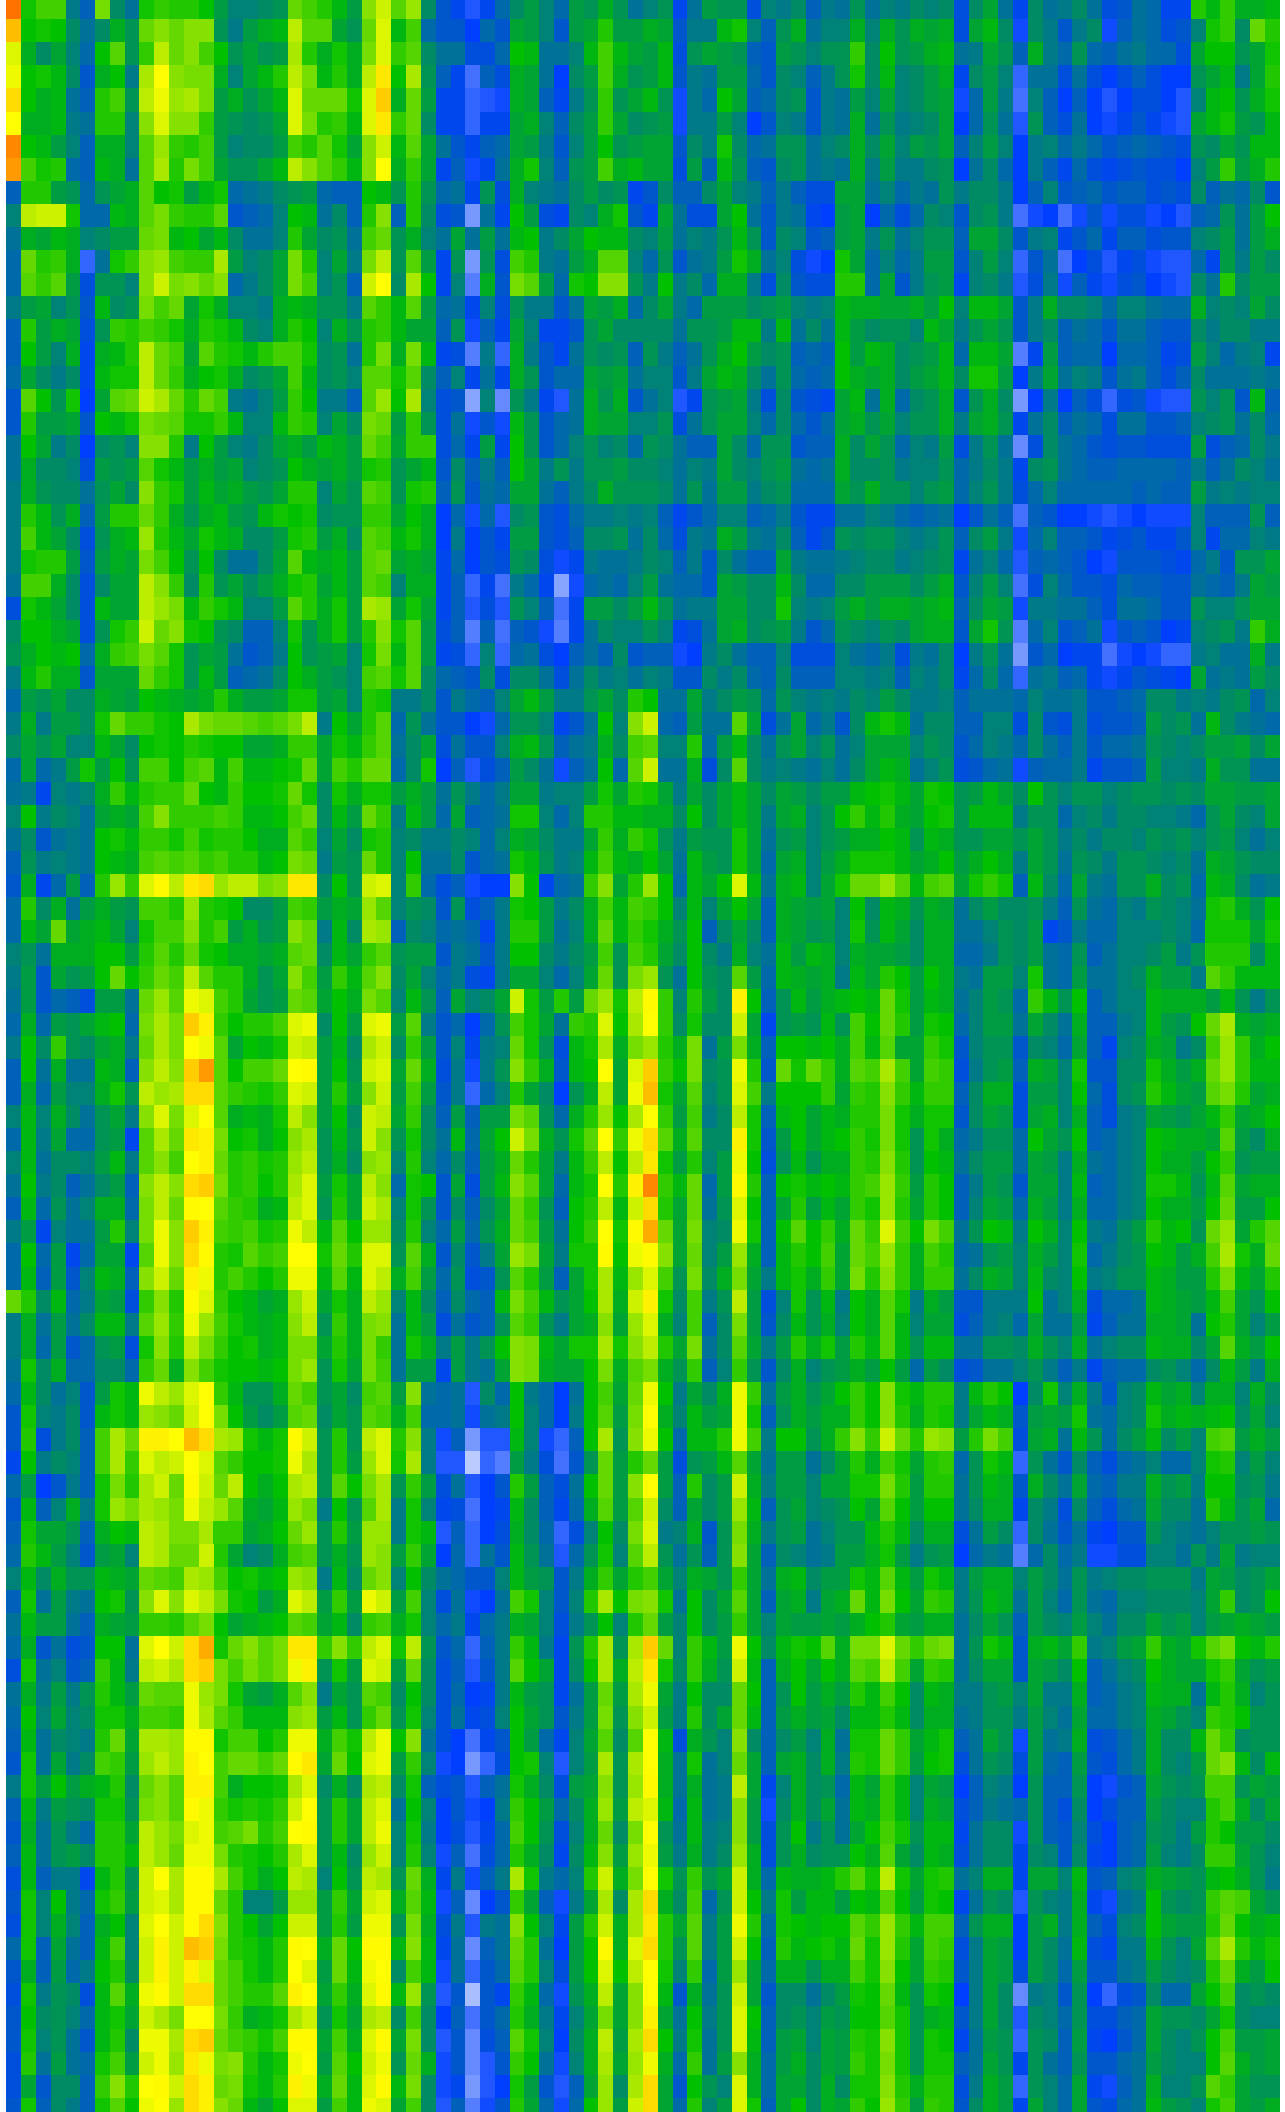

At5g64813  
At5g3270  
At5g35900  
At5g63740  
At1g48980  
At3g28610  
At1g10880  
At1g71450  
At4g07720  
At5g67350  
At2g11390  
At1g61210  
At1g74350  
At3g44580  
At2g25500  
At5g27530  
At1g54720  
At1g38550  
At3g30610  
At1g61920  
At1g54640  
At2g31590  
At5g26890  
At2g07550  
At2g17750  
At1g20730  
At3g33064  
At2g15500  
At4g11950  
At3g28170  
At4g11930  
At3g26940  
At1g71290  
At2g04460  
At3g42330  
At1g61430  
At1g73560  
At3g53550  
At1g19010  
At1g35550  
At2g10880  
At4g19940  
At1g78400  
At4g04760  
At2g35950  
At5g02210  
At3g60010  
At3g49020  
At3g22770  
At1g05330  
At2g14830  
At5g18180  
At1g54550  
At3g19040  
At5g51360  
At5g53960  
At4g11730  
At2g31770  
At4g08800  
At3g11920  
At5g51250  
At3g45540  
At4g36105  
At3g05440  
At1g03320  
At2g21920  
At3g22920  
At1g49150  
At2g17170  
At4g02740  
At4g26820  
At2g16365  
At1g22010  
At5g50470  
At1g19060  
At4g21690  
At5g53640  
At5g37230  
At5g50480  
At1g26590  
At5g20370  
At5g49250  
At4g26340  
At1g59790  
At3g28330  
At3g59070  
At1g32430  
At1g30790  
At1g32320  
At4g05270  
At5g37040  
At3g10580

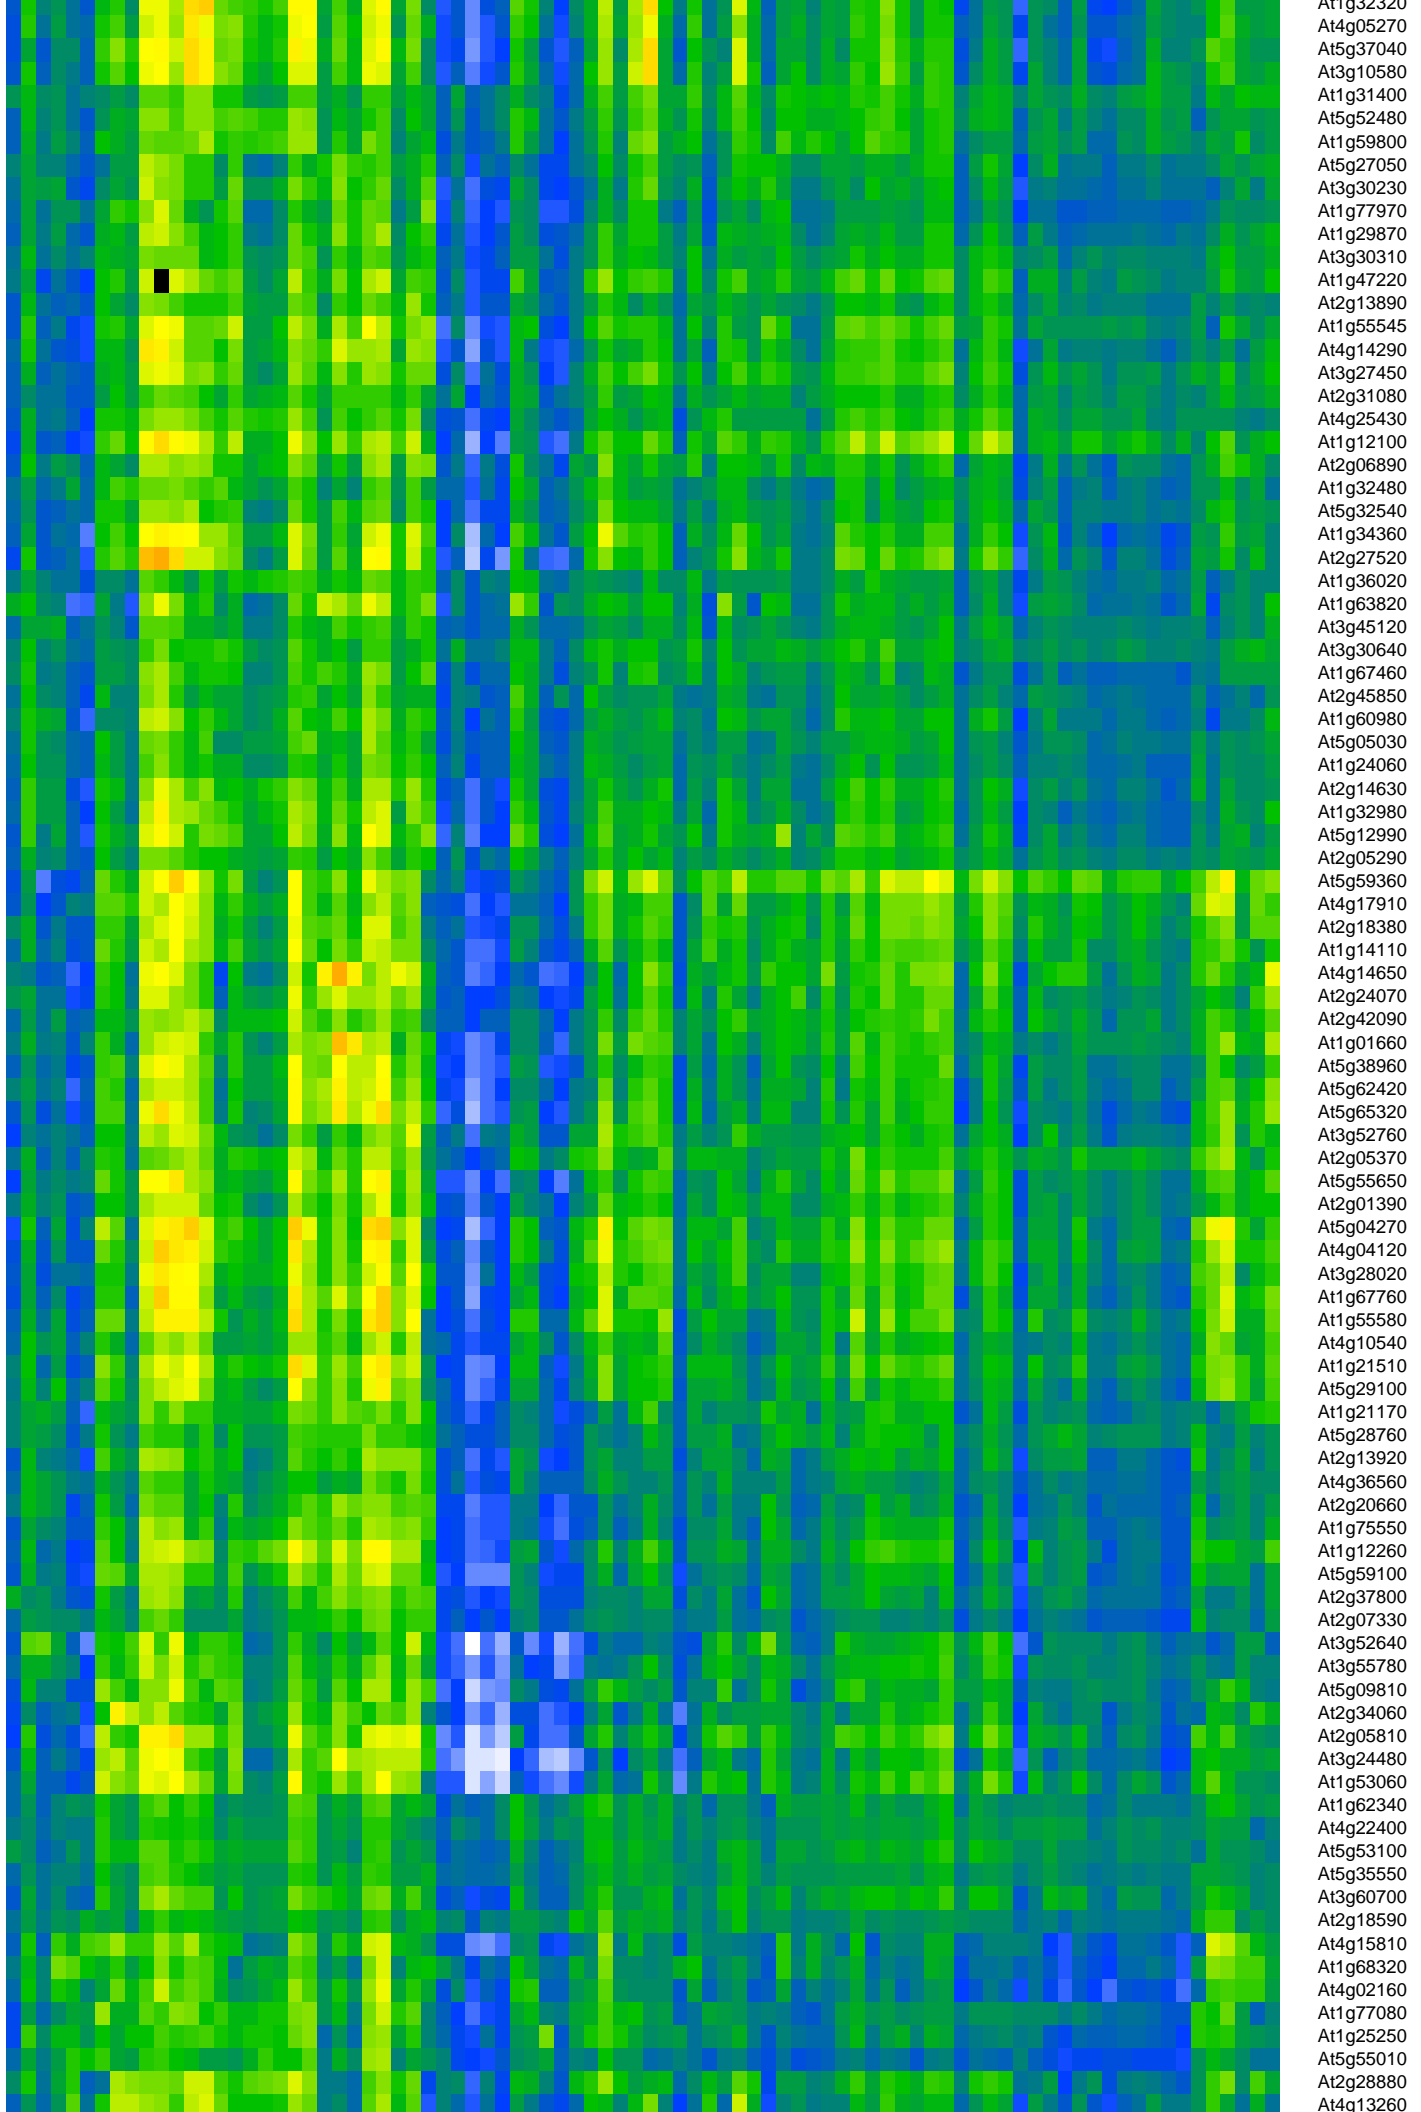

At1g32320  
At4g05270  
At5g37040  
At3g10580  
At1g31400  
At5g52480  
At1g59800  
At5g27050  
At3g30230  
At1g77970  
At1g29870  
At3g30310  
At1g47220  
At2g13890  
At1g55545  
At4g14290  
At3g27450  
At2g31080  
At4g25430  
At1g12100  
At2g06890  
At1g32480  
At5g32540  
At1g34360  
At2g27520  
At1g36020  
At1g63820  
At3g45120  
At3g30640  
At1g67460  
At2g45850  
At1g60980  
At5g05030  
At1g24060  
At2g14630  
At1g32980  
At5g12990  
At2g05290  
At5g59360  
At4g17910  
At2g18380  
At1g14110  
At4g14650  
At2g24070  
At2g42090  
At1g01660  
At5g38960  
At5g62420  
At5g65320  
At3g52760  
At2g05370  
At5g55650  
At2g01390  
At5g04270  
At4g04120  
At3g28020  
At1g67760  
At1g55580  
At4g10540  
At1g21510  
At5g29100  
At1g21170  
At5g28760  
At2g13920  
At4g36560  
At2g20660  
At1g75550  
At1g12260  
At5g59100  
At2g37800  
At2g07330  
At3g52640  
At3g55780  
At5g09810  
At2g34060  
At2g05810  
At3g24480  
At1g53060  
At1g62340  
At4g22400  
At5g53100  
At5g35550  
At3g60700  
At2g18590  
At4g15810  
At1g68320  
At4g02160  
At1g77080  
At1g25250  
At5g55010  
At2g28880  
At4g13260

At1g23230  
At5g55010  
At2g28880  
At4g13260  
At5g32600  
At5g10420  
At1g69100  
At4g01500  
At5g37110  
At1g10010  
At4g28900  
At3g42780  
At4g37230  
At4g13800  
At2g18920  
At5g41490  
At3g57270  
At1g47465  
At4g03730  
At1g05740  
At4g17980  
At1g12660  
At2g39540  
At2g29370  
At3g46570  
At4g17060  
At1g66220  
At2g21040  
At3g19085  
At1g58330  
At2g13510  
At1g31640  
At5g28870  
At2g14450  
At3g57430  
At3g24030  
At4g24460  
At5g03370  
At1g49930  
At1g19620  
At2g30790  
At2g23210  
At2g44930  
At1g76530  
At5g28310  
At1g78030  
At1g12470  
At3g26160  
At5g01080  
At5g37900  
At3g55820  
At1g58390  
At2g34400  
At3g13770  
At4g19095  
At3g06710  
At5g55360  
At2g24660  
At5g15940  
At1g22980  
At3g50430  
At4g02780  
At1g73910  
At5g19720  
At1g30550  
At1g01670  
At1g20750  
At1g74630  
At4g03720  
At3g27320  
At5g45540  
At3g12300  
At1g50260  
At1g14760  
At2g30300  
At4g39650  
At3g15355  
At4g04650  
At3g14300  
At3g55300  
At5g26350  
At3g31350  
At4g32750  
At3g01100  
At2g07230  
At3g22290  
At4g08640  
At5g46320  
At2g13330  
At1g76770  
At4g10845  
At2g13020

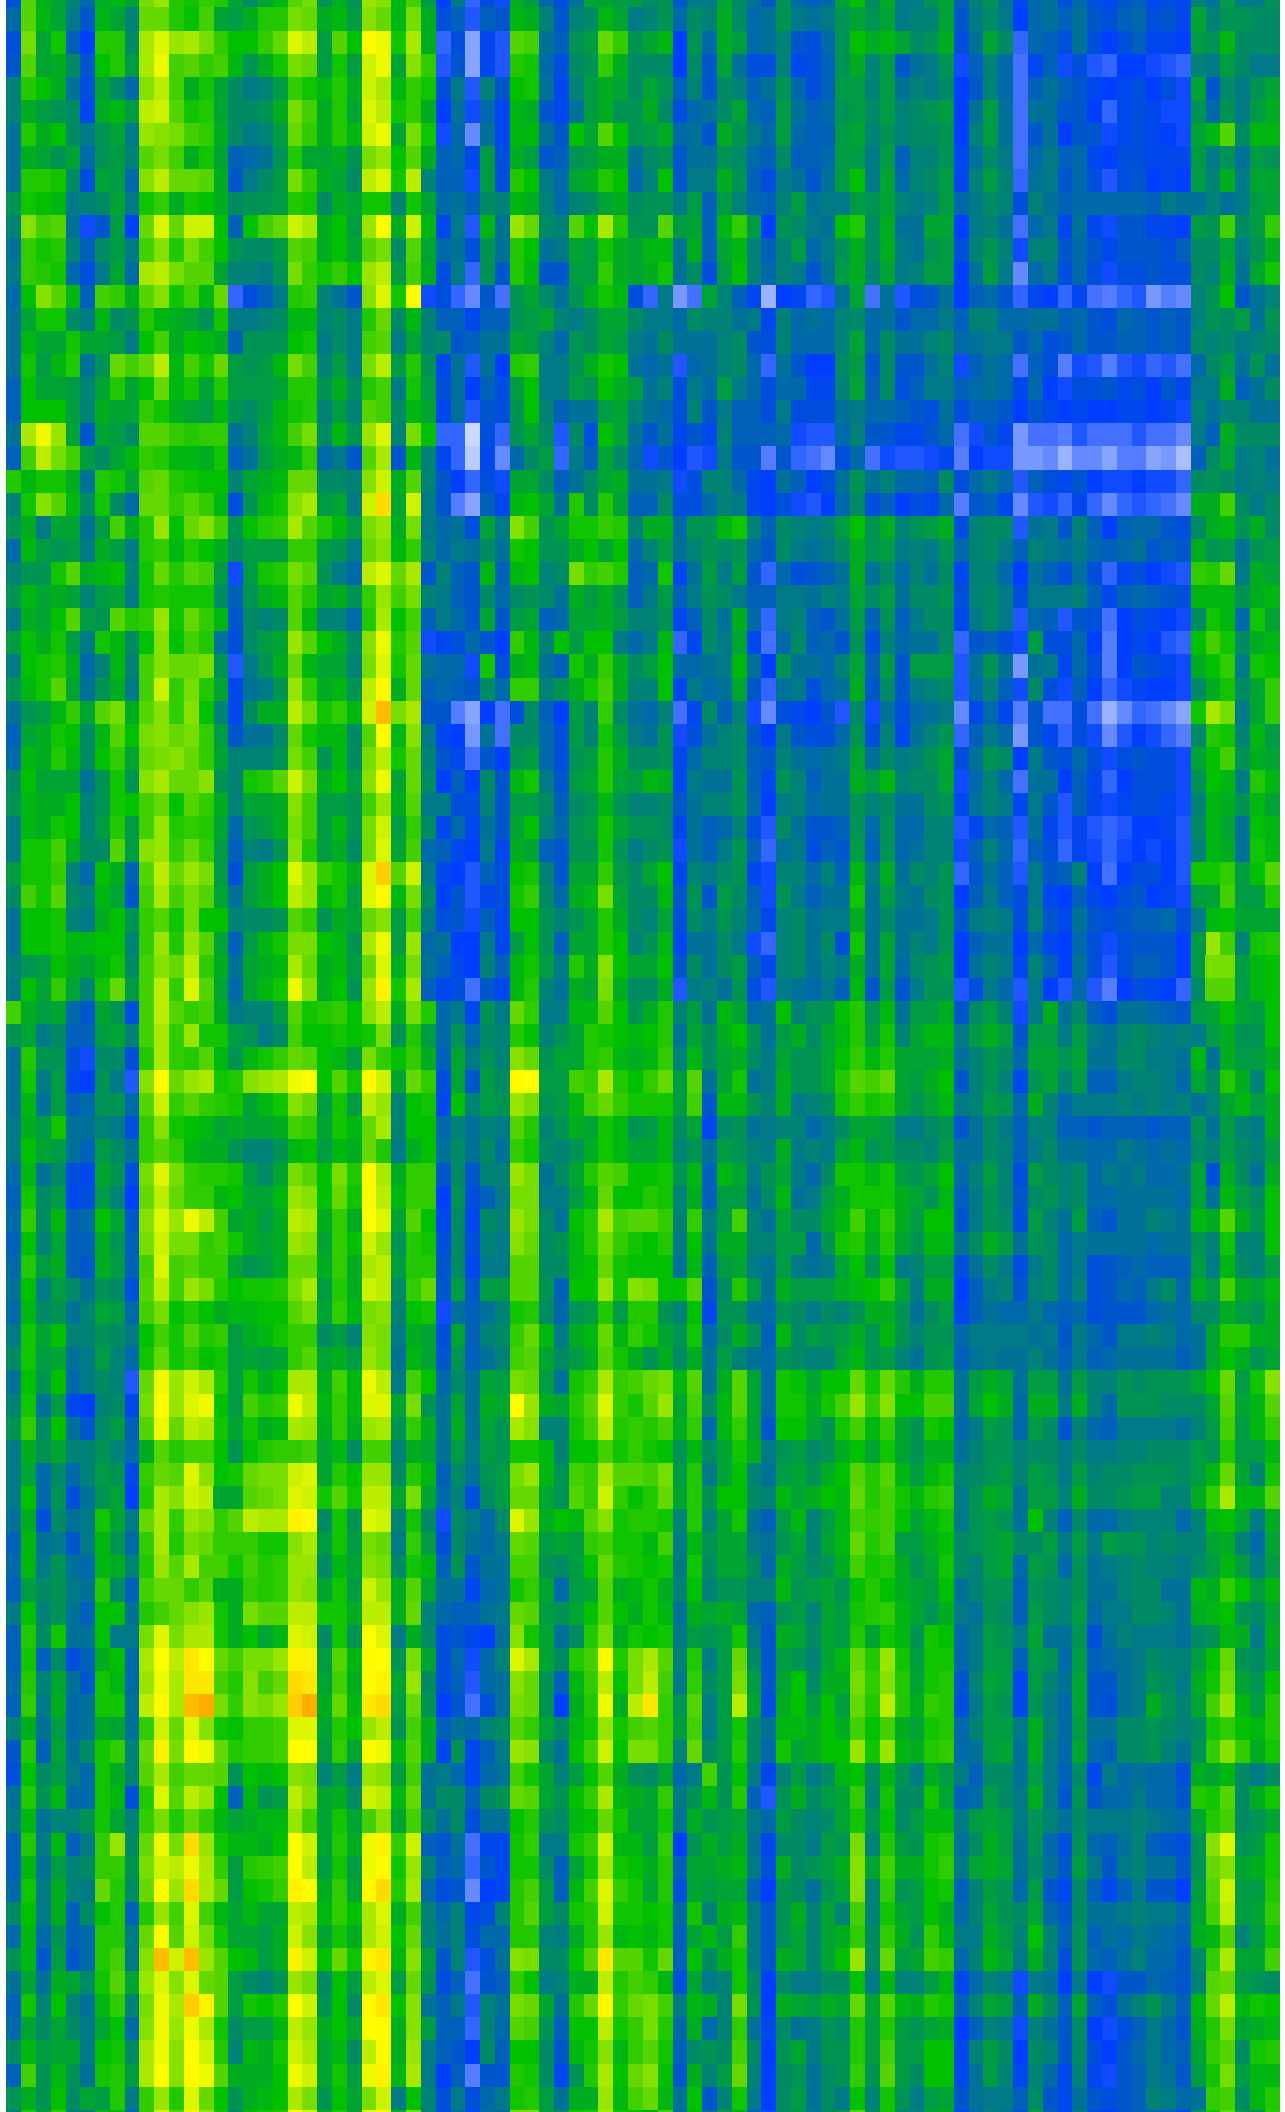

At1g76770  
At4g10845  
At2g13020  
At2g25380  
At1g17800  
At4g33370  
At1g64410  
At3g31390  
At3g45500  
At1g48040  
At3g02270  
At5g46360  
At4g09560  
At4g07420  
At4g16730  
At1g44085  
At1g65740  
At1g54700  
At3g16785  
At5g47130  
At3g60760  
At5g51290  
At3g04050  
At2g45780  
At4g12990  
At3g43940  
At3g25960  
At5g45320  
At1g42365  
At5g40680  
At3g60720  
At1g49110  
At1g39350  
At4g38590  
At5g35640  
At3g04270  
At5g37160  
At3g21210  
At2g05350  
At2g19550  
At3g46480  
At2g05900  
At1g42220  
At5g41540  
At1g07460  
At5g28140  
At3g28680  
At2g07686  
At5g35250  
At5g35240  
At3g62320  
At2g13550  
At5g40290  
At1g42700  
At2g18320  
At5g66980  
At4g39756  
At2g26950  
At5g39630  
At1g50470  
At2g11010  
At4g02300  
At2g14550  
At3g16160  
At5g01680  
At5g62400  
At2g34320  
At3g49440  
At2g11210  
At3g19940  
At4g38000  
At5g22600  
At3g59170  
At5g03000  
At1g65640  
At2g46840  
At1g32300  
At3g10560  
At4g09930  
At5g49440  
At3g30400  
At5g55020  
At1g43930  
At5g45910  
At5g35690  
At5g07880  
At4g24860  
At3g20980  
At3g13228  
At3g45460  
At2g40910

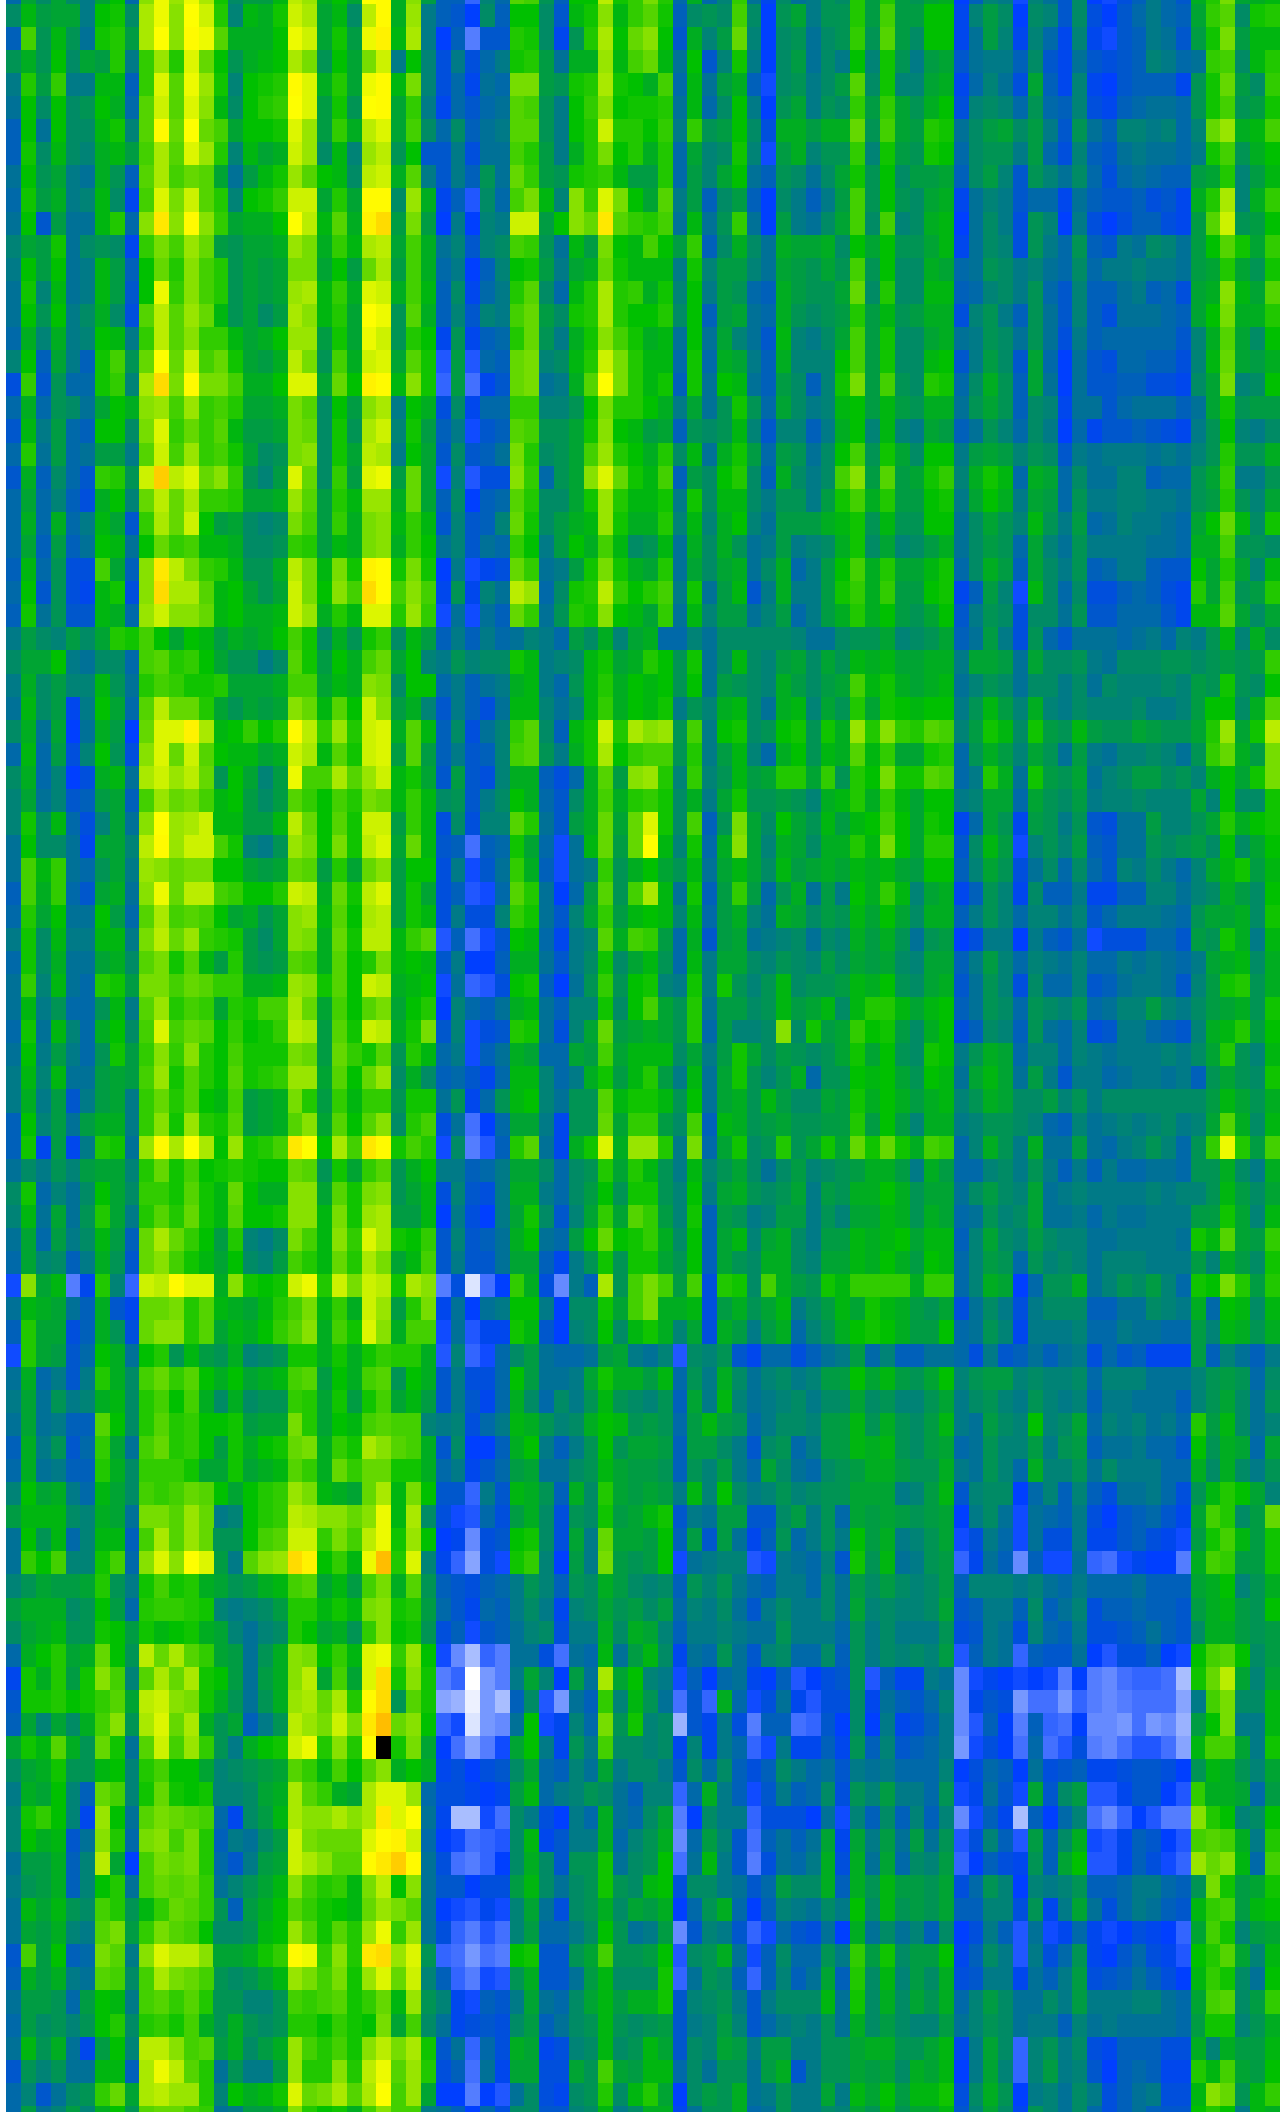

At3g13228  
At3g45460  
At2g40910  
At2g47280  
At4g21080  
At5g39700  
At4g22430  
At3g02100  
At3g42550  
At1g78840  
At3g44210  
At2g42930  
At2g13230  
At3g30320  
At2g24810  
At2g16680  
At2g01240  
At3g42160  
At5g22970  
At2g22520  
At2g43310  
At5g28420  
At2g38890  
At1g22420  
At5g49050  
At3g56660  
At4g14460  
At3g20880  
At2g07110  
At2g19700  
At5g38800  
At1g54330  
At3g43760  
At1g06310  
At5g67040  
At1g69660  
At3g22350  
At5g35800  
At1g51900  
At5g25410  
At3g10240  
At4g29330  
At1g66170  
At5g43200  
At5g30470  
At4g32080  
At5g28940  
At1g66630  
At4g23760  
At5g53740  
At3g57840  
At5g22990  
At3g58300  
At3g14820  
At4g07586  
At3g05280  
At1g53600  
At4g24030  
At2g12230  
At3g09140  
At4g21050  
At2g01200  
At3g16550  
At2g33230  
At5g17970  
At3g53590  
At4g27930  
At2g13940  
At4g00280  
At1g13200  
At1g35890  
At3g46150  
At4g17310  
At1g17250  
At1g48960  
At4g22940  
At2g07200  
At2g14160  
At1g67410  
At3g49820  
At3g49930  
At3g54070  
At1g12630  
At2g40580  
At4g36590  
At5g19700  
At1g33910  
At1g63590  
At3g21590  
At1g67020  
At4g01890

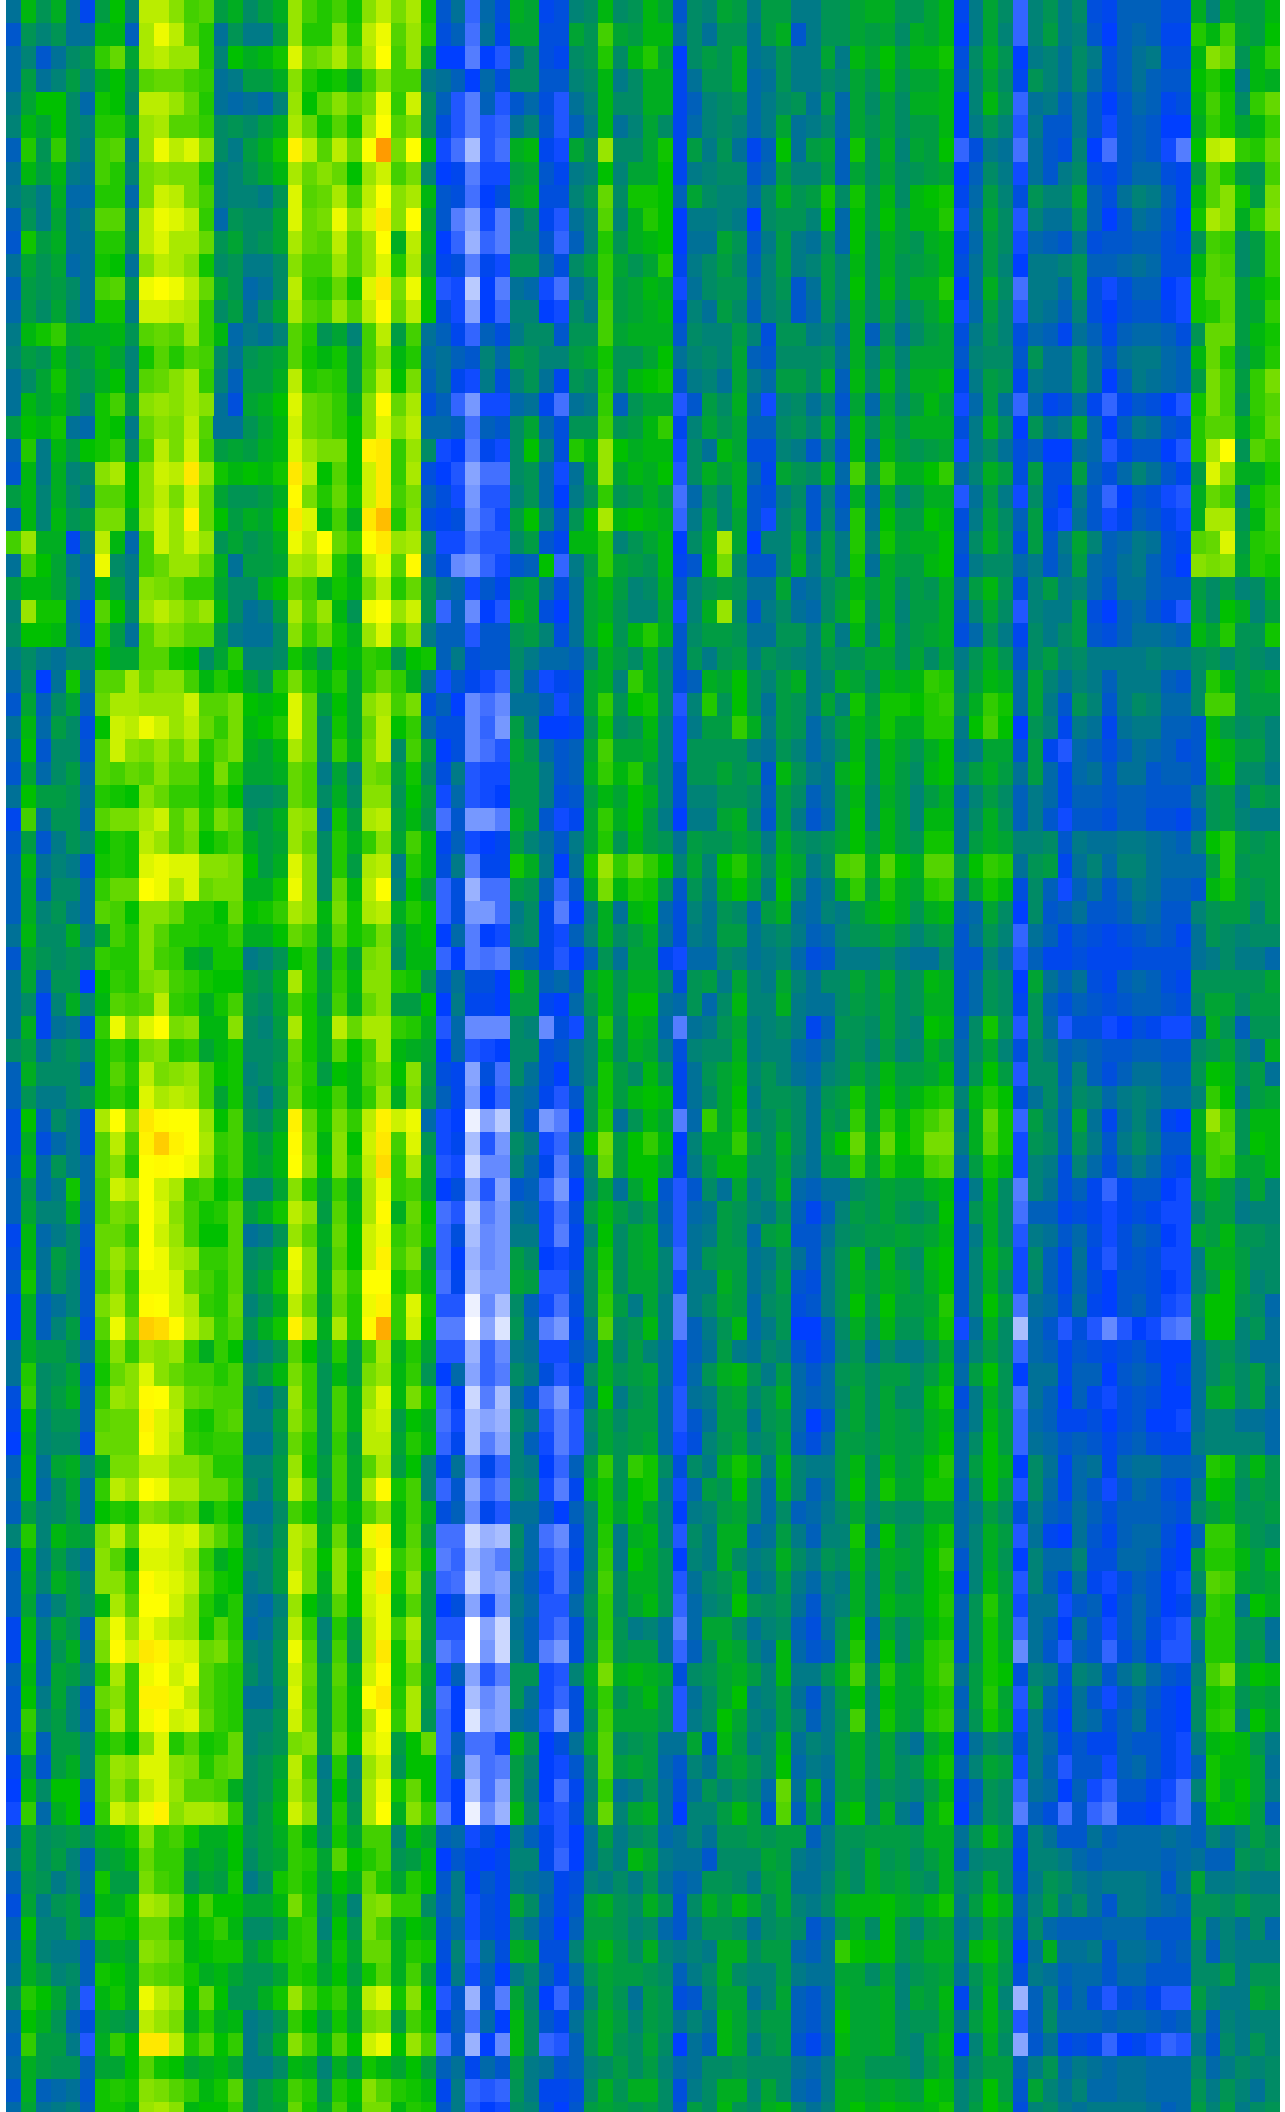

At3g21590  
At1g67020  
At4g01890  
At5g01070  
At1g69990  
At4g03870  
At5g11570  
At1g68040  
At5g03360  
At1g53660  
At1g30560  
At1g63550  
At3g58890  
At5g28225  
At2g21680  
At5g35300  
At5g44770  
At5g40210  
At2g34540  
At4g38530  
At4g04660  
At1g09890  
At1g79370  
At1g68330  
At1g67510  
At5g37620  
At2g21910  
At3g53840  
At3g42980  
At2g35860  
At2g06410  
At3g25720  
At4g38990  
At3g42770  
At1g56040  
At5g65370  
At5g12910  
At3g17620  
At5g01150  
At5g13620  
At5g46660  
At4g24300  
At5g29040  
At4g08830  
At4g03150  
At3g25850  
At2g15920  
At1g33920  
At1g52180  
At2g10930  
At1g43760  
At2g18876  
At2g17310  
At4g22370  
At2g05030  
At1g65210  
At2g36940  
At1g28220  
At4g15860  
At4g25920  
At4g07500  
At1g20680  
At3g48950  
At5g55080  
At4g20900  
At4g04280  
At2g23290  
At2g23570  
At3g55680  
At1g55310  
At5g40070  
At5g28550  
At1g64250  
At4g04050  
At3g30820  
At4g29650  
At5g43610  
At1g51300  
At4g38880  
At1g67635  
At3g20030  
At3g51210  
At1g35995  
At3g13890  
At3g27990  
At4g09390  
At3g22250  
At5g37610  
At3g32360  
At1g31380  
At3g43130  
At2g17920

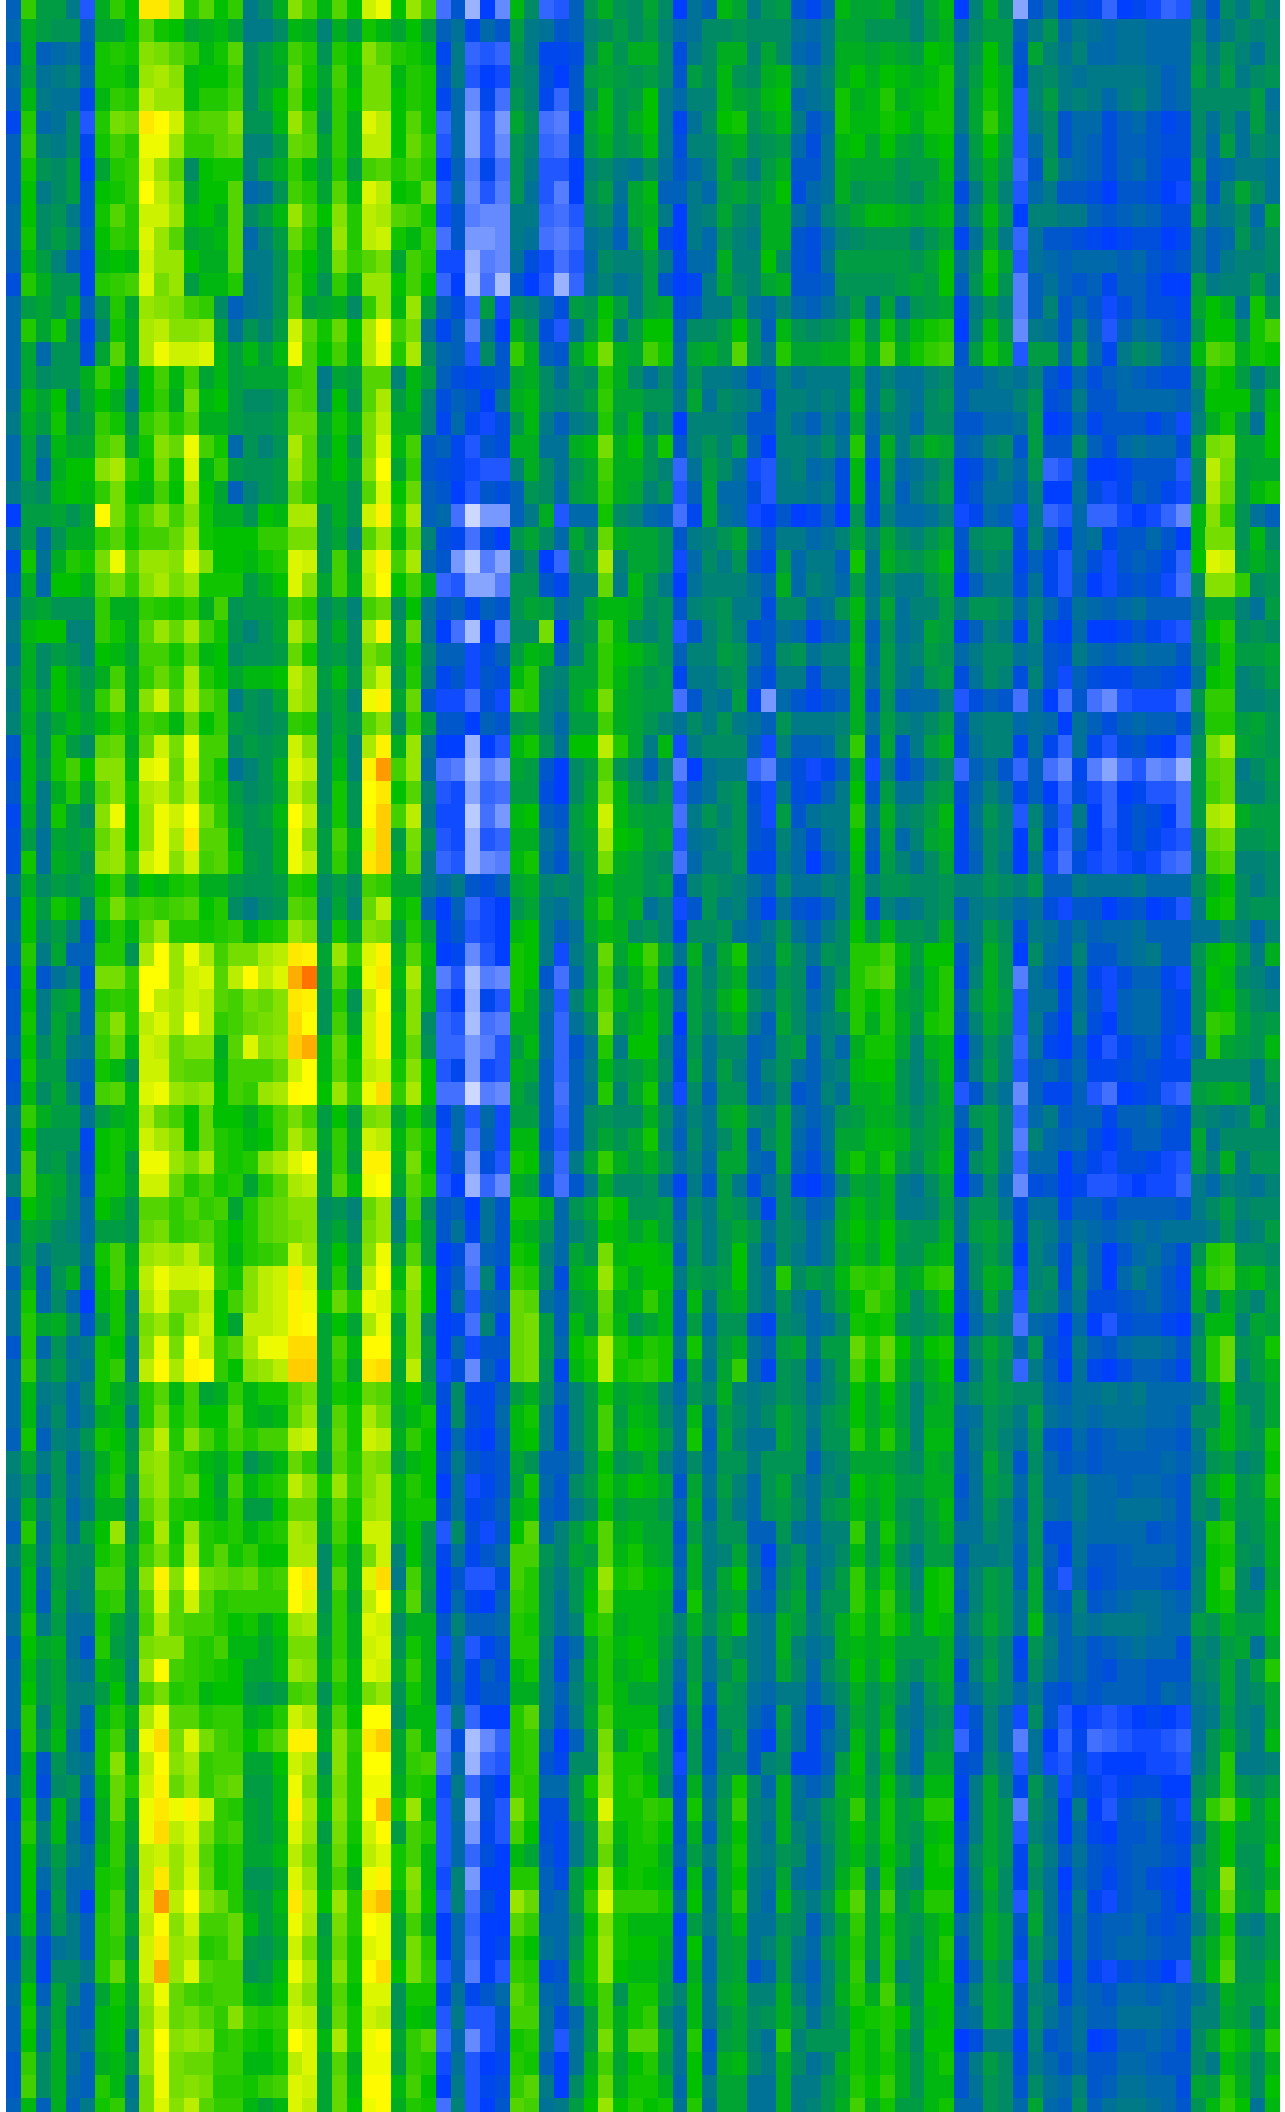

At3g32360  
At1g31380  
At3g43130  
At2g17920  
At2g05610  
At3g20400  
At5g28090  
At2g27395  
At5g34790  
At1g23300  
At5g67010  
At3g42300  
At3g49230  
At3g32270  
At1g33660  
At1g23700  
At2g36920  
At5g51650  
At2g14950  
At4g09360  
At1g53820  
At3g32190  
At3g51400  
At5g61750  
At4g16566  
At5g59660  
At5g41250  
At5g48250  
At2g29165  
At4g03700  
At2g44030  
At4g13880  
At4g05470  
At1g71910  
At1g52810  
At1g02620  
At2g16110  
At5g41320  
At1g67240  
At3g42580  
At4g13060  
At2g19890  
At3g19230  
At2g41590  
At5g17320  
At4g01760  
At4g05550  
At1g03445  
At3g49510  
At3g59460  
At3g19610  
At2g04420  
At1g75360  
At1g31080  
At1g07025  
At5g49310  
At2g15720  
At1g12720  
At5g28130  
At4g04690  
At5g40750  
At2g10370  
At3g30220  
At1g78710  
At1g51810  
At1g37020  
At4g26290  
At4g30300  
At5g20220  
At4g03660  
At1g23510  
At2g33010  
At5g39620  
At1g32020  
At5g58890  
At1g77095  
At1g52990  
At3g04490  
At5g04610  
At4g04600  
At1g62170  
At1g80740  
At2g15520  
At1g67450  
At3g44780  
At4g04000  
At5g34830  
At4g09860  
At4g11590  
At3g31360  
At4g05630  
At4g31630



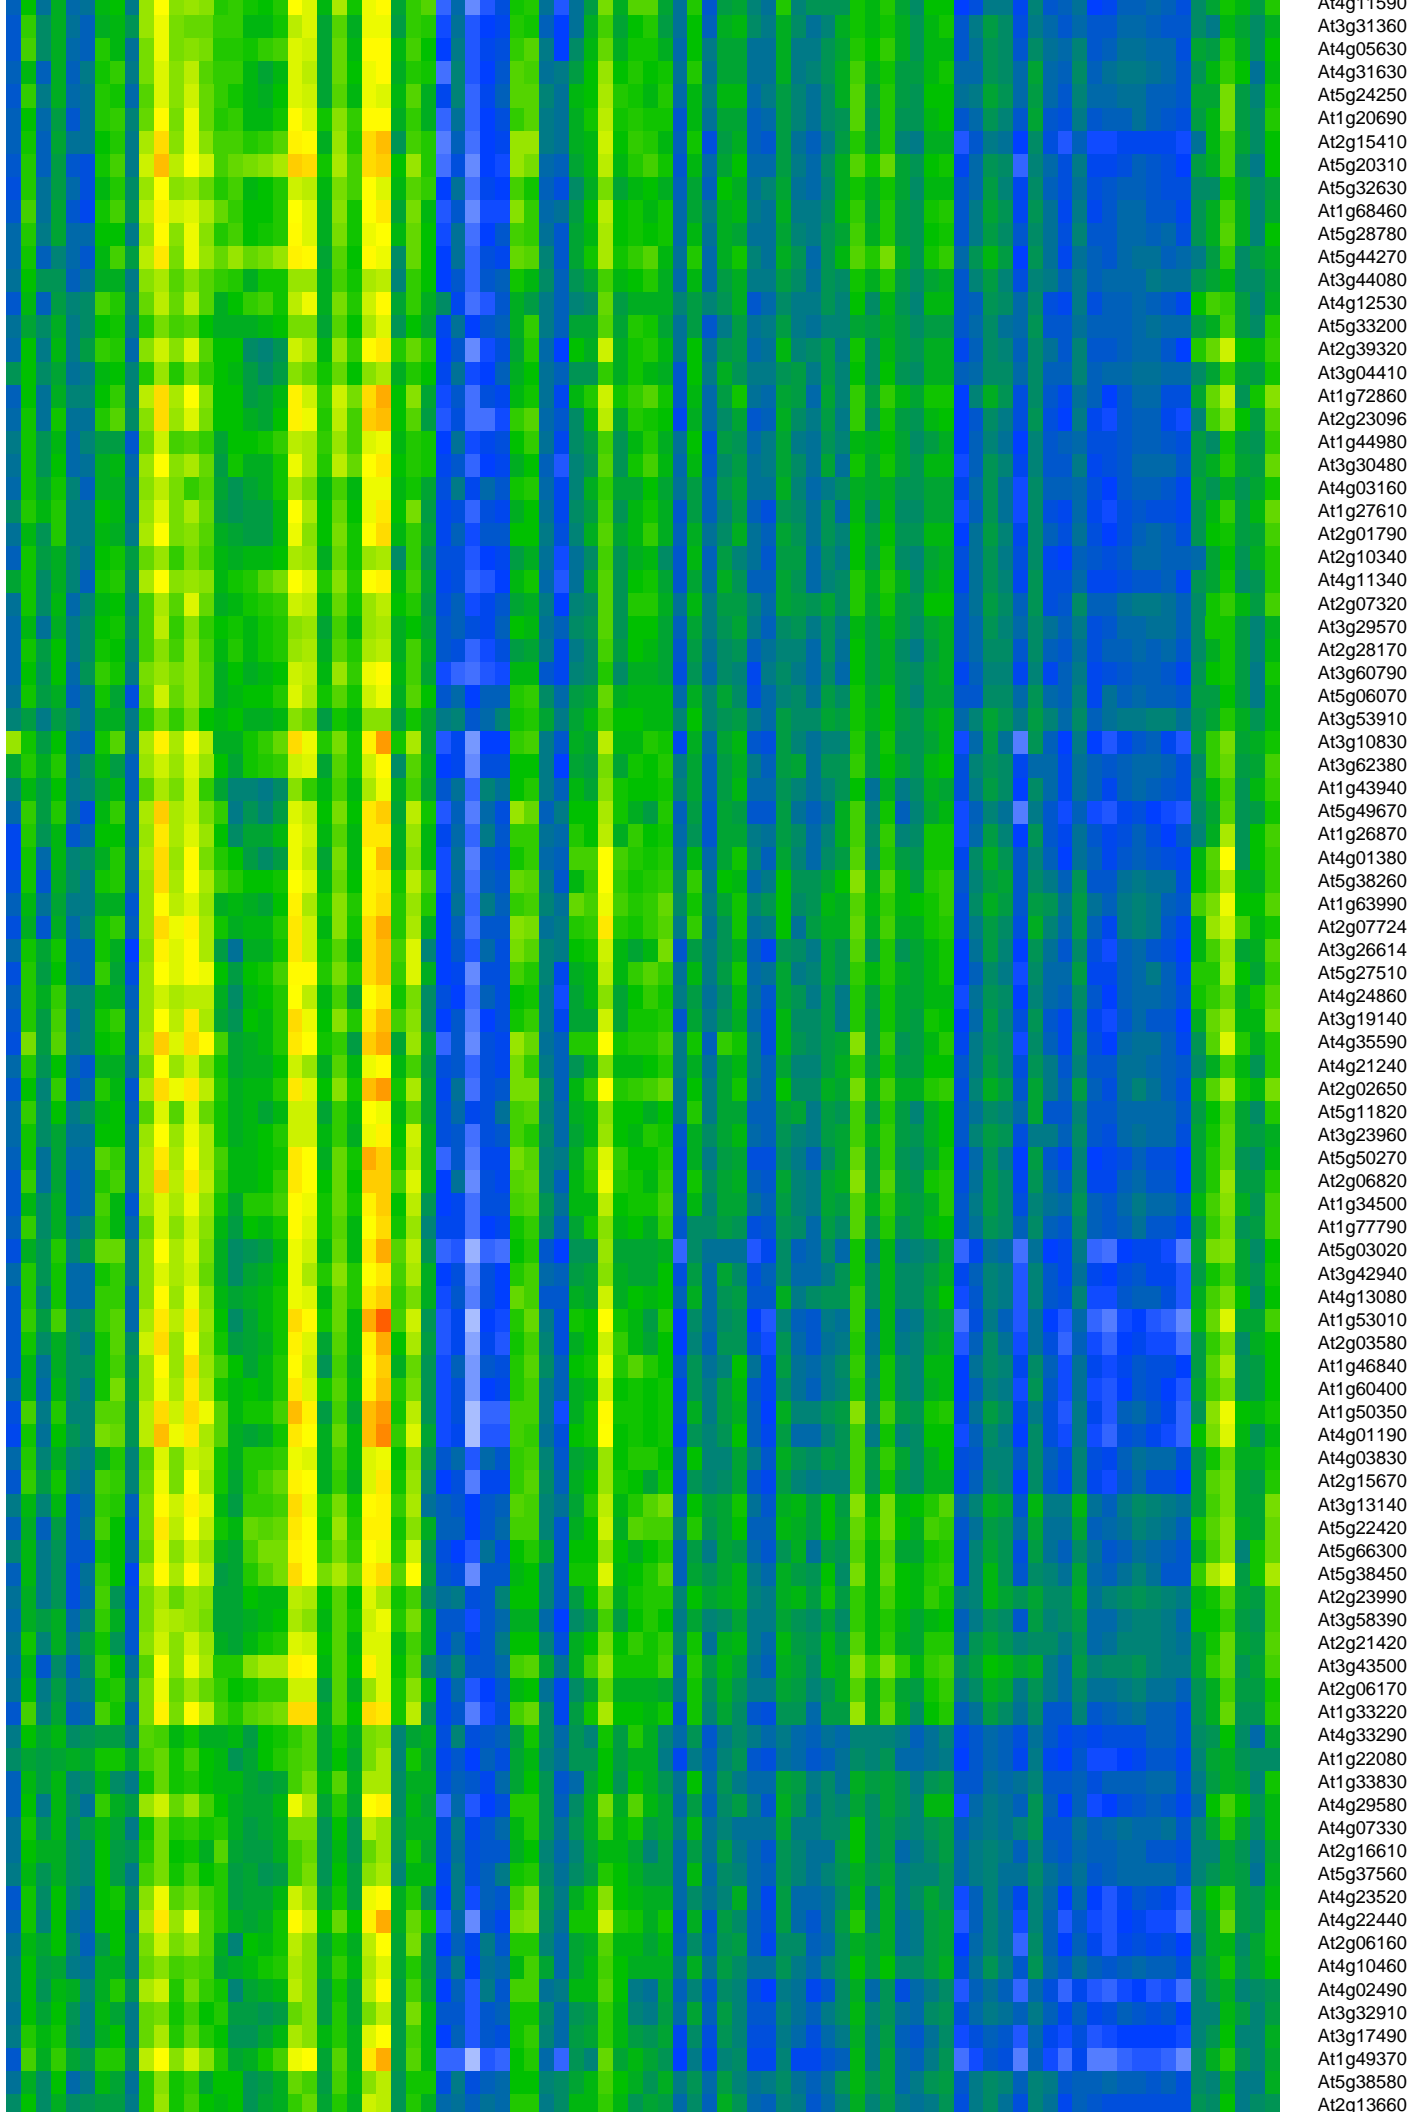

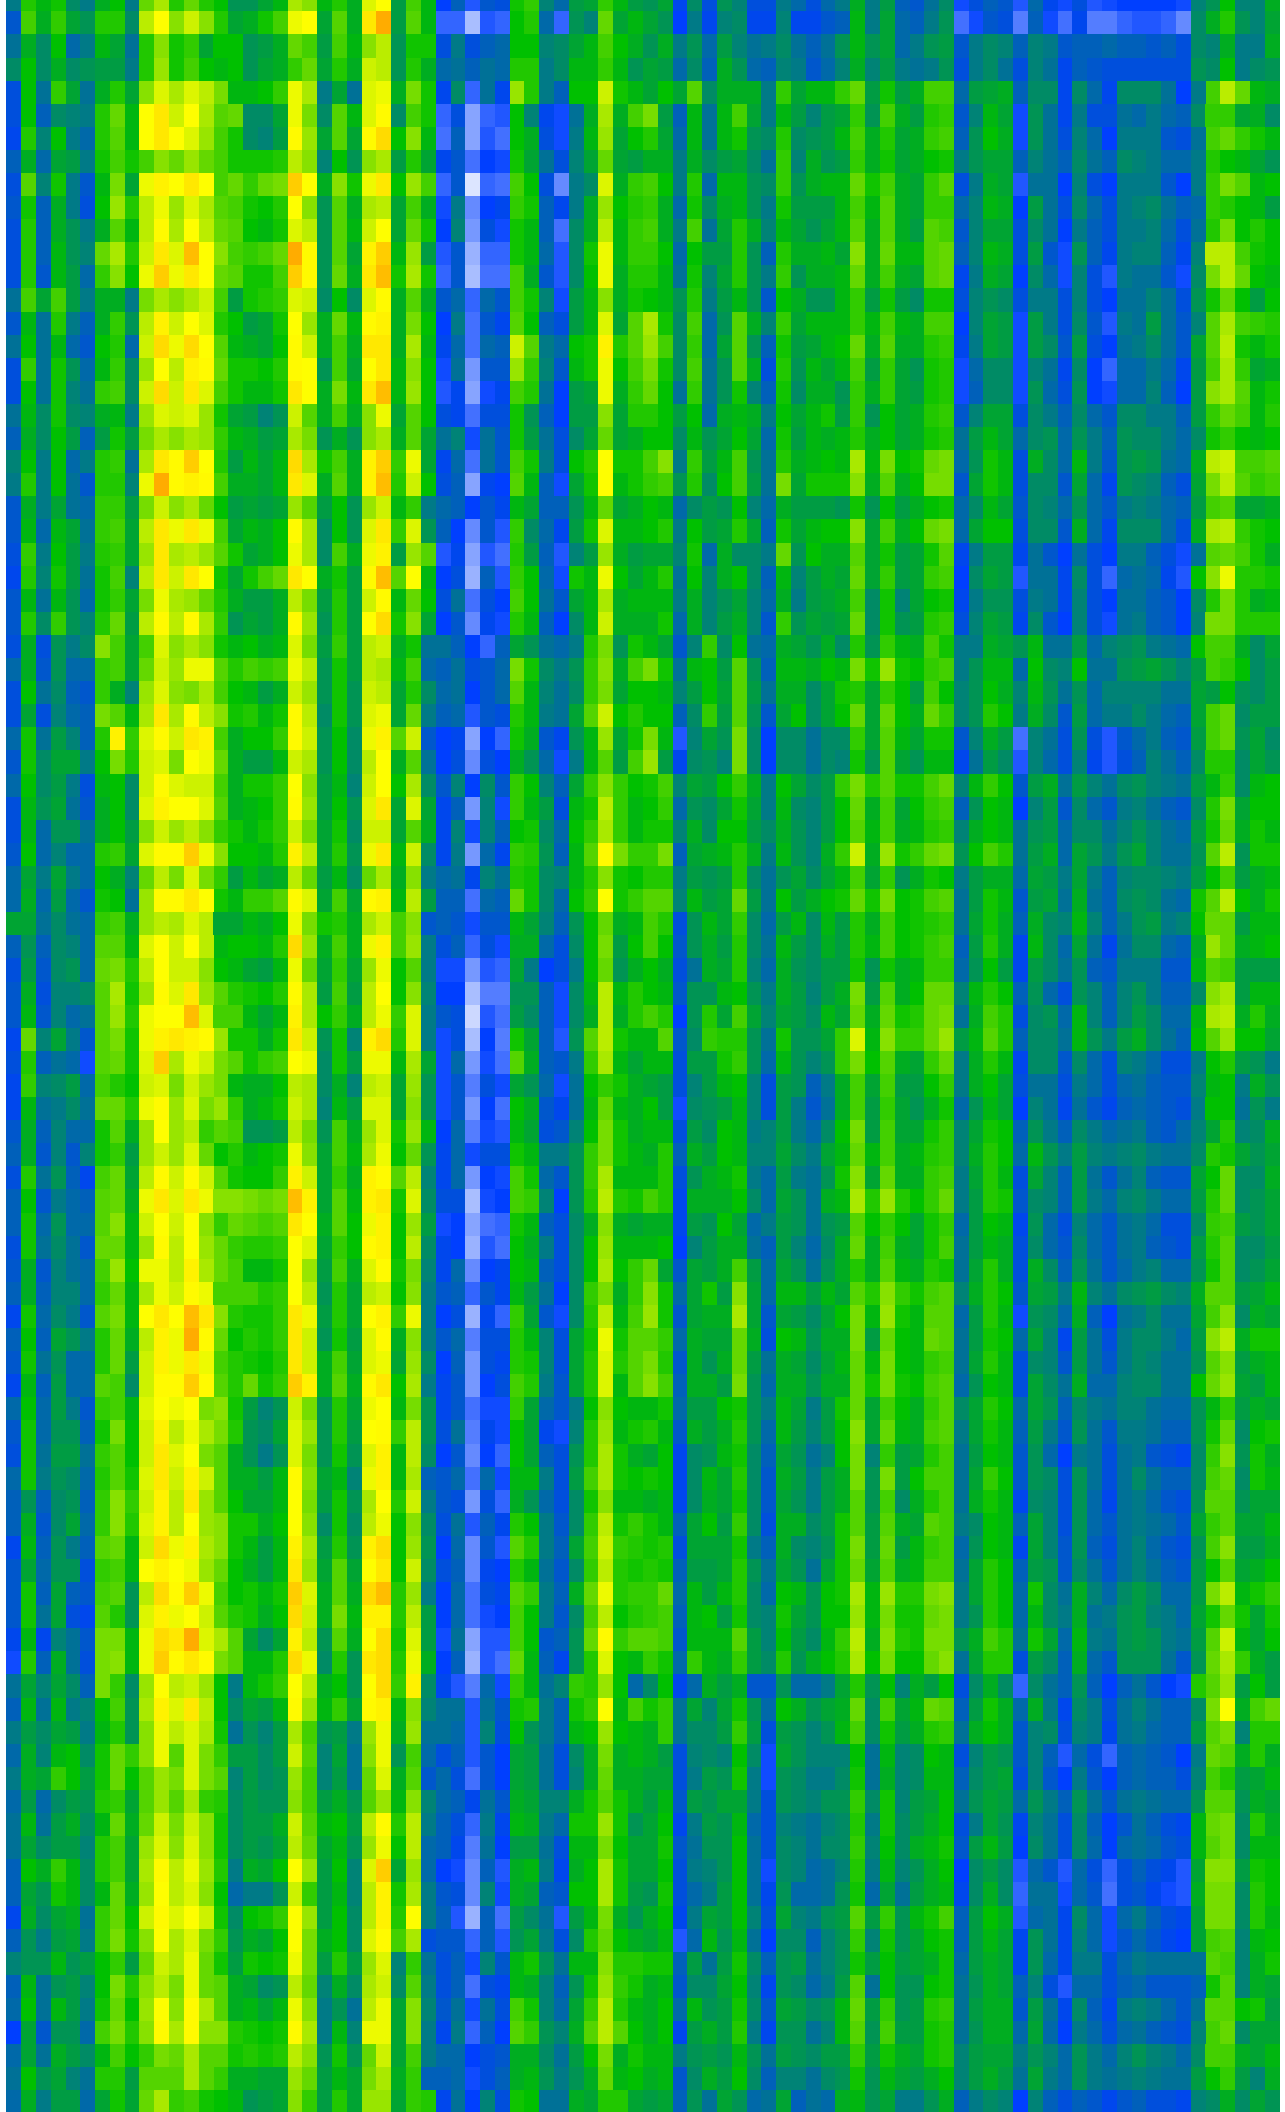

At3g17430  
At1g49370  
At5g38580  
At2g13660  
At4g19470  
At1g35513  
At2g07685  
At5g28570  
At2g05640  
At2g33000  
At3g48830  
At1g67220  
At1g63200  
At2g10440  
At2g35590  
At2g30680  
At3g13280  
At1g53360  
At2g45940  
At2g15060  
At2g07683  
At1g74820  
At4g32105  
At1g24650  
At2g15510  
At1g64070  
At5g41660  
At1g42360  
At3g24230  
At1g15320  
At1g26795  
At5g23260  
At1g78720  
At3g58280  
At4g13740  
At1g31840  
At3g16710  
At4g29560  
At2g07490  
At2g44590  
At5g01480  
At2g29820  
At4g30590  
At3g42690  
At3g10600  
At5g61090  
At4g29640  
At4g10220  
At5g15560  
At1g09360  
At2g13630  
At1g47940  
At1g01690  
At1g31510  
At4g11940  
At3g11060  
At3g57370  
At2g31050  
At2g32310  
At3g12850  
At5g11120  
At5g56800  
At3g59180  
At1g36970  
At1g49790  
At2g12910  
At1g05550  
At1g30780  
At5g50970  
At5g41710  
At1g69560  
At1g32610  
At1g77860  
At3g18350  
At5g48130  
At3g32090  
At3g13630  
At5g15480  
At3g42100  
At2g18580  
At3g42920  
At3g62520  
At4g18770  
At5g28590  
At2g31460  
At5g48080  
At2g09840  
At2g07691  
At5g50190  
At1g62490  
At3g44900  
At3g29650

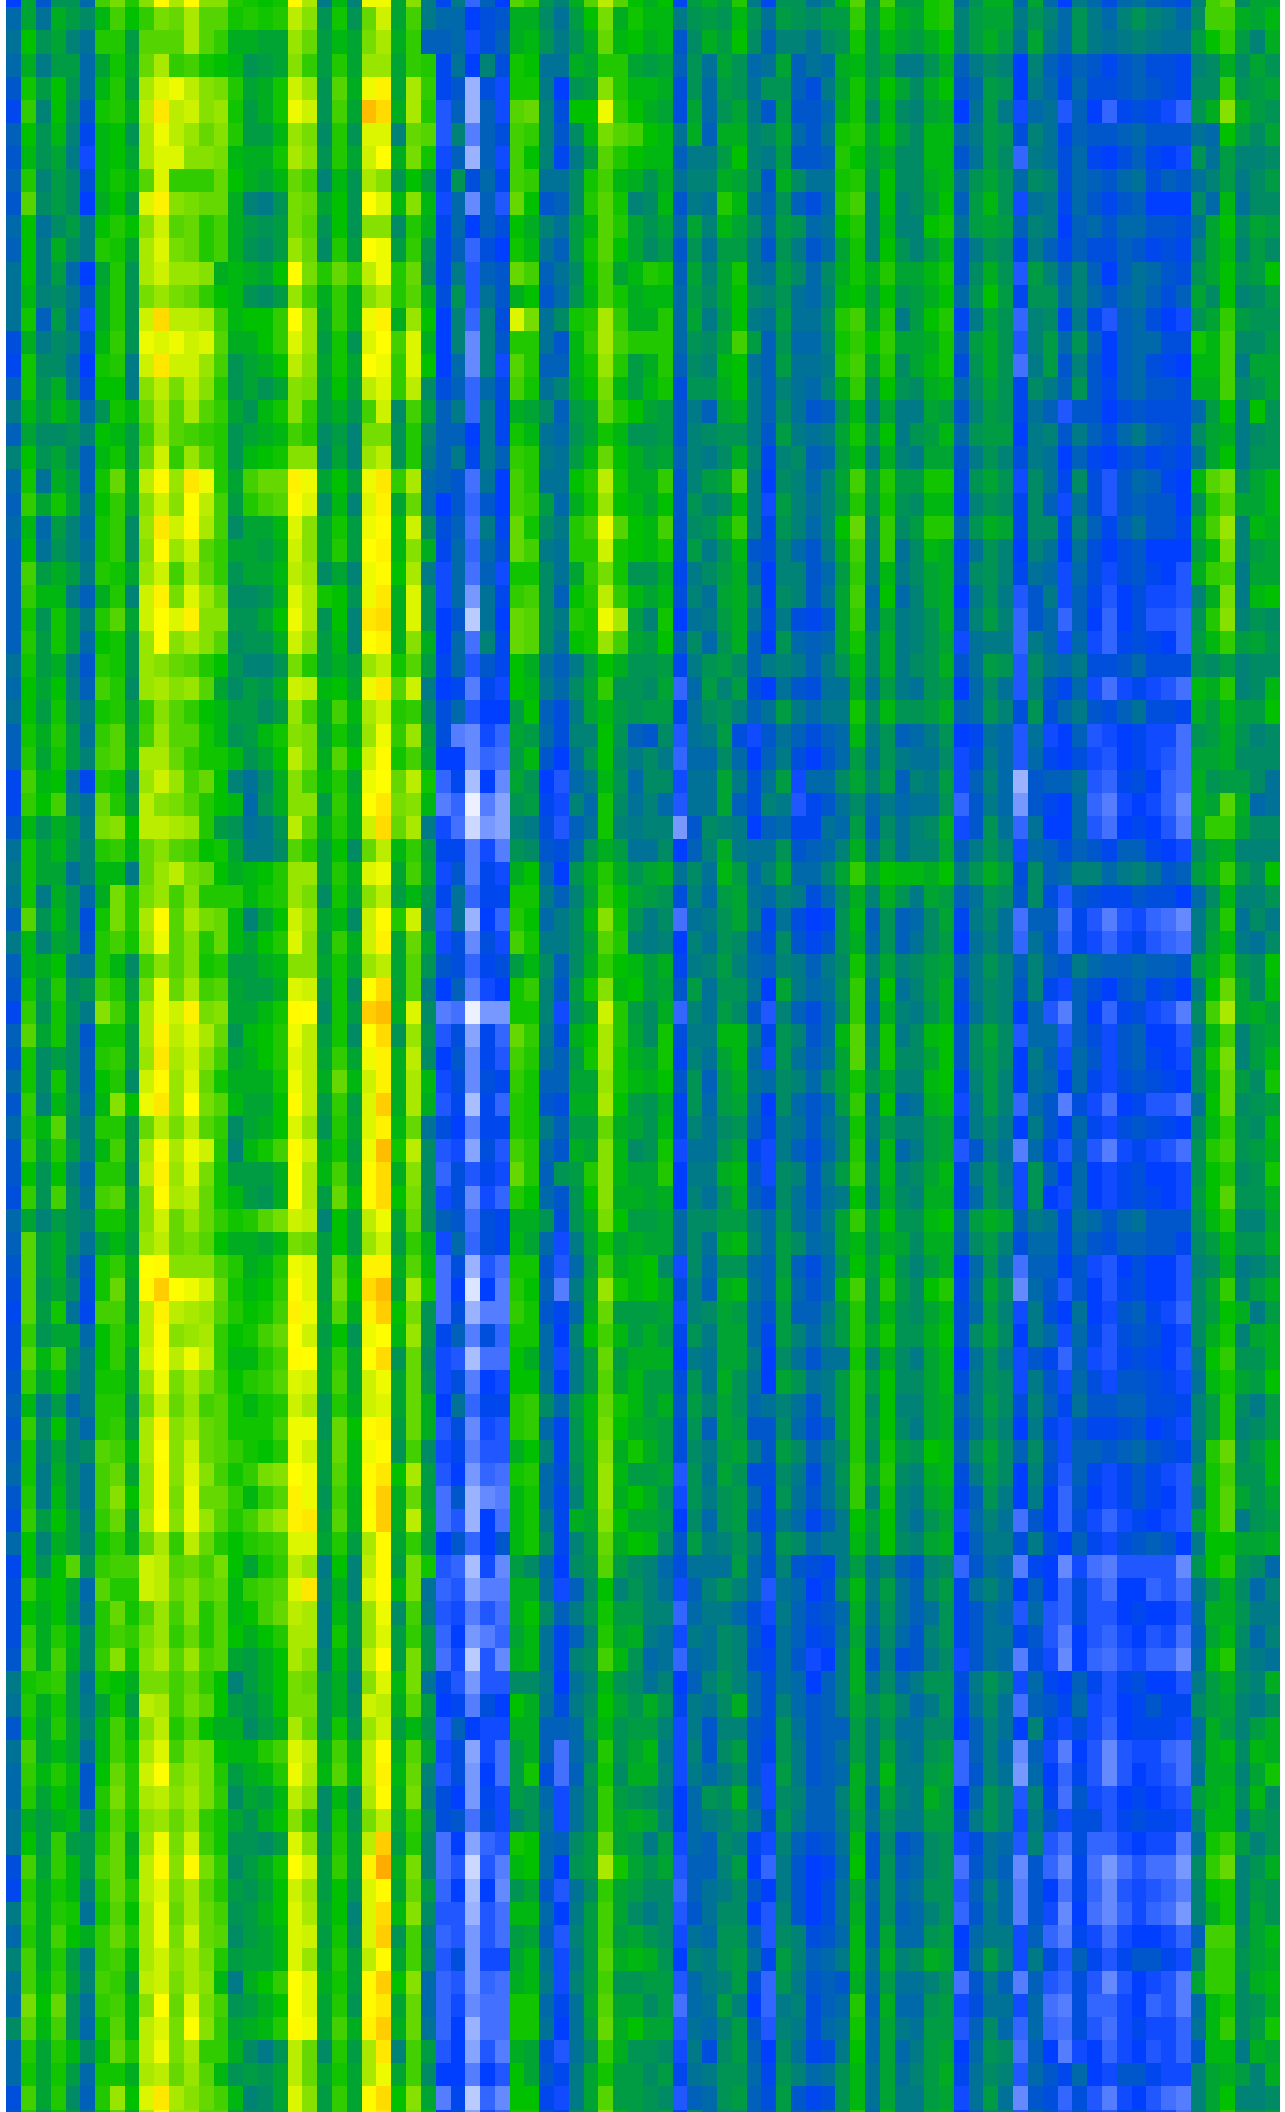

At1g62490  
At3g44900  
At3g29650  
At4g39440  
At5g08230  
At4g39420  
At2g48060  
At4g05570  
At2g14640  
At2g27160  
At5g60130  
At4g22650  
At2g01700  
At2g26135  
At1g31240  
At4g10670  
At4g08340  
At1g64310  
At3g26270  
At3g25420  
At1g67640  
At2g32780  
At5g37280  
At5g24480  
At2g36450  
At4g14590  
At2g38185  
At5g39440  
At3g43750  
At5g57680  
At2g13150  
At3g45510  
At2g07020  
At1g35370  
At1g48095  
At5g41640  
At4g13760  
At1g66370  
At5g09270  
At1g10000  
At2g21110  
At1g28327  
At3g45990  
At5g07700  
At2g16410  
At3g29796  
At1g77780  
At4g15590  
At5g34880  
At3g56670  
At3g30290  
At5g28930  
At2g24080  
At5g28820  
At3g57820  
At4g03950  
At4g21366  
At4g03890  
At4g35170  
At2g13335  
At3g51700  
At5g55800  
At2g17610  
At5g20340  
At2g28980  
At3g60060  
At1g58260  
At4g23250  
At1g22720  
At2g16840  
At5g17140  
At3g49480  
At1g17545  
At2g41930  
At5g19710  
At4g14470  
At1g47770  
At5g22960  
At2g14405  
At5g17730  
At1g15600  
At3g45670  
At3g17180  
At4g11490  
At1g09720  
At5g26190  
At1g69820  
At2g39160  
At5g35540  
At5g45980  
At5g03940

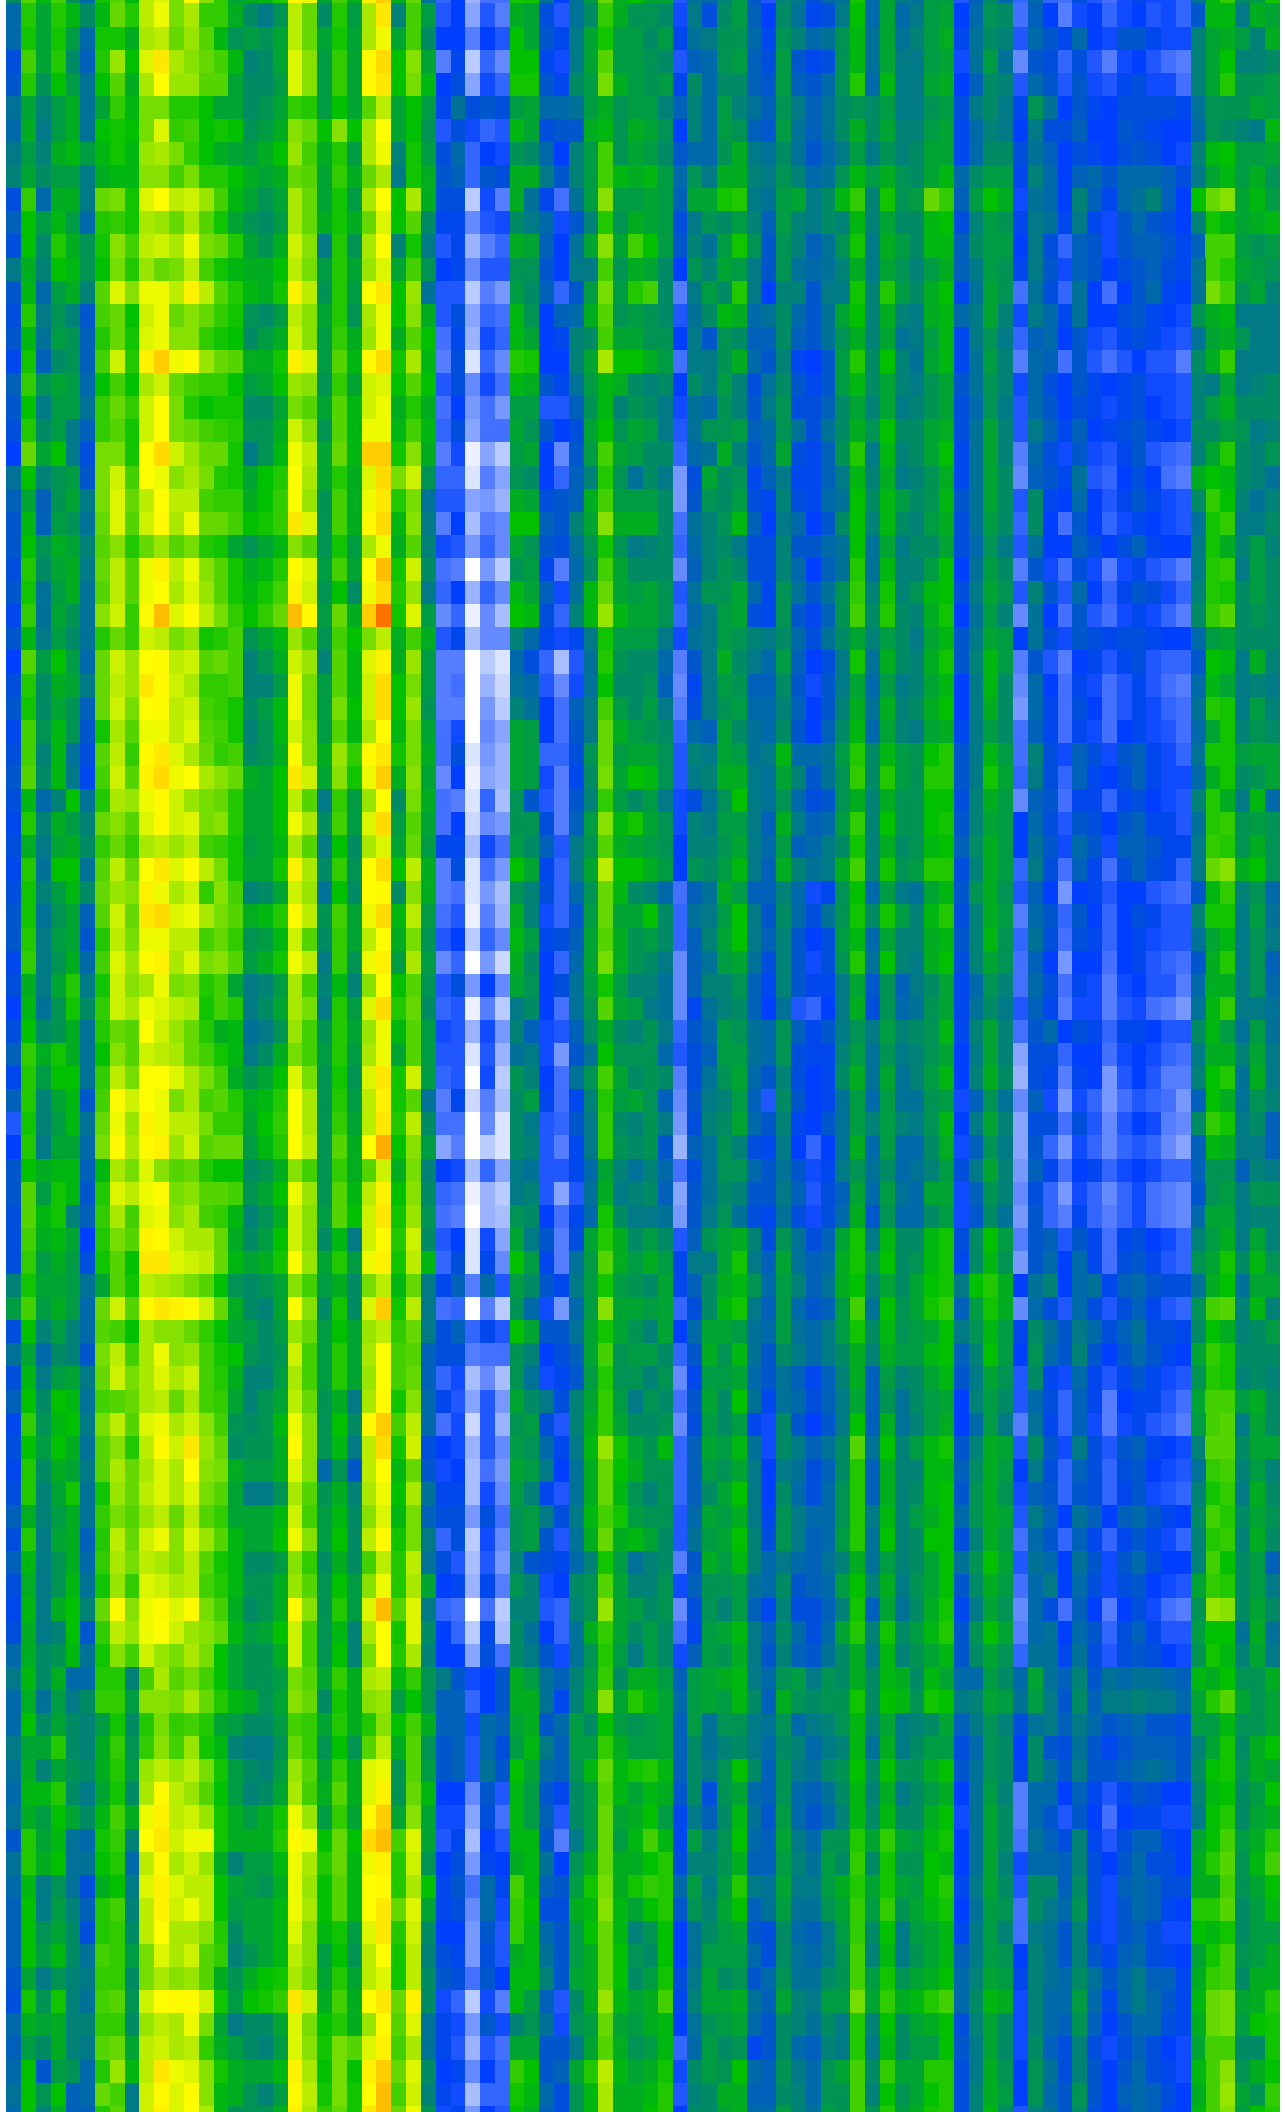

At5g35540  
At5g45980  
At5g03940  
At1g50530  
At1g31960  
At4g37950  
At1g74200  
At1g42697  
At4g13000  
At4g08840  
At5g02920  
At1g63870  
At3g58860  
At5g33340  
At3g42830  
At3g14320  
At2g37910  
At3g42360  
At2g23940  
At1g05135  
At1g41810  
At3g30250  
At2g27410  
At5g43800  
At2g20460  
At3g44420  
At1g34440  
At5g16430  
At1g31030  
At4g26920  
At2g17910  
At2g14595  
At1g28160  
At5g52800  
At2g16690  
At2g15740  
At2g10850  
At3g44410  
At5g06920  
At5g11370  
At1g29780  
At5g11080  
At2g07030  
At3g14640  
At3g25280  
At2g05390  
At1g24640  
At2g35740  
At1g75470  
At1g57830  
At5g47340  
At1g51910  
At3g42140  
At2g42340  
At3g58230  
At1g16910  
At2g05720  
At5g43550  
At2g39640  
At1g80140  
At2g28580  
At5g48420  
At4g04550  
At5g38370  
At3g42530  
At2g33720  
At3g24675  
At5g33350  
At3g18900  
At4g09710  
At3g07250  
At4g18090  
At2g17000  
At3g29020  
At4g24650  
At1g34650  
At2g16810  
At1g56380  
At4g08730  
At5g02980  
At1g28040  
At1g19930  
At1g01180  
At4g16080  
At2g11360  
At5g32540  
At5g28580  
At4g34690  
At4g10780  
At4g10690  
At3g56280

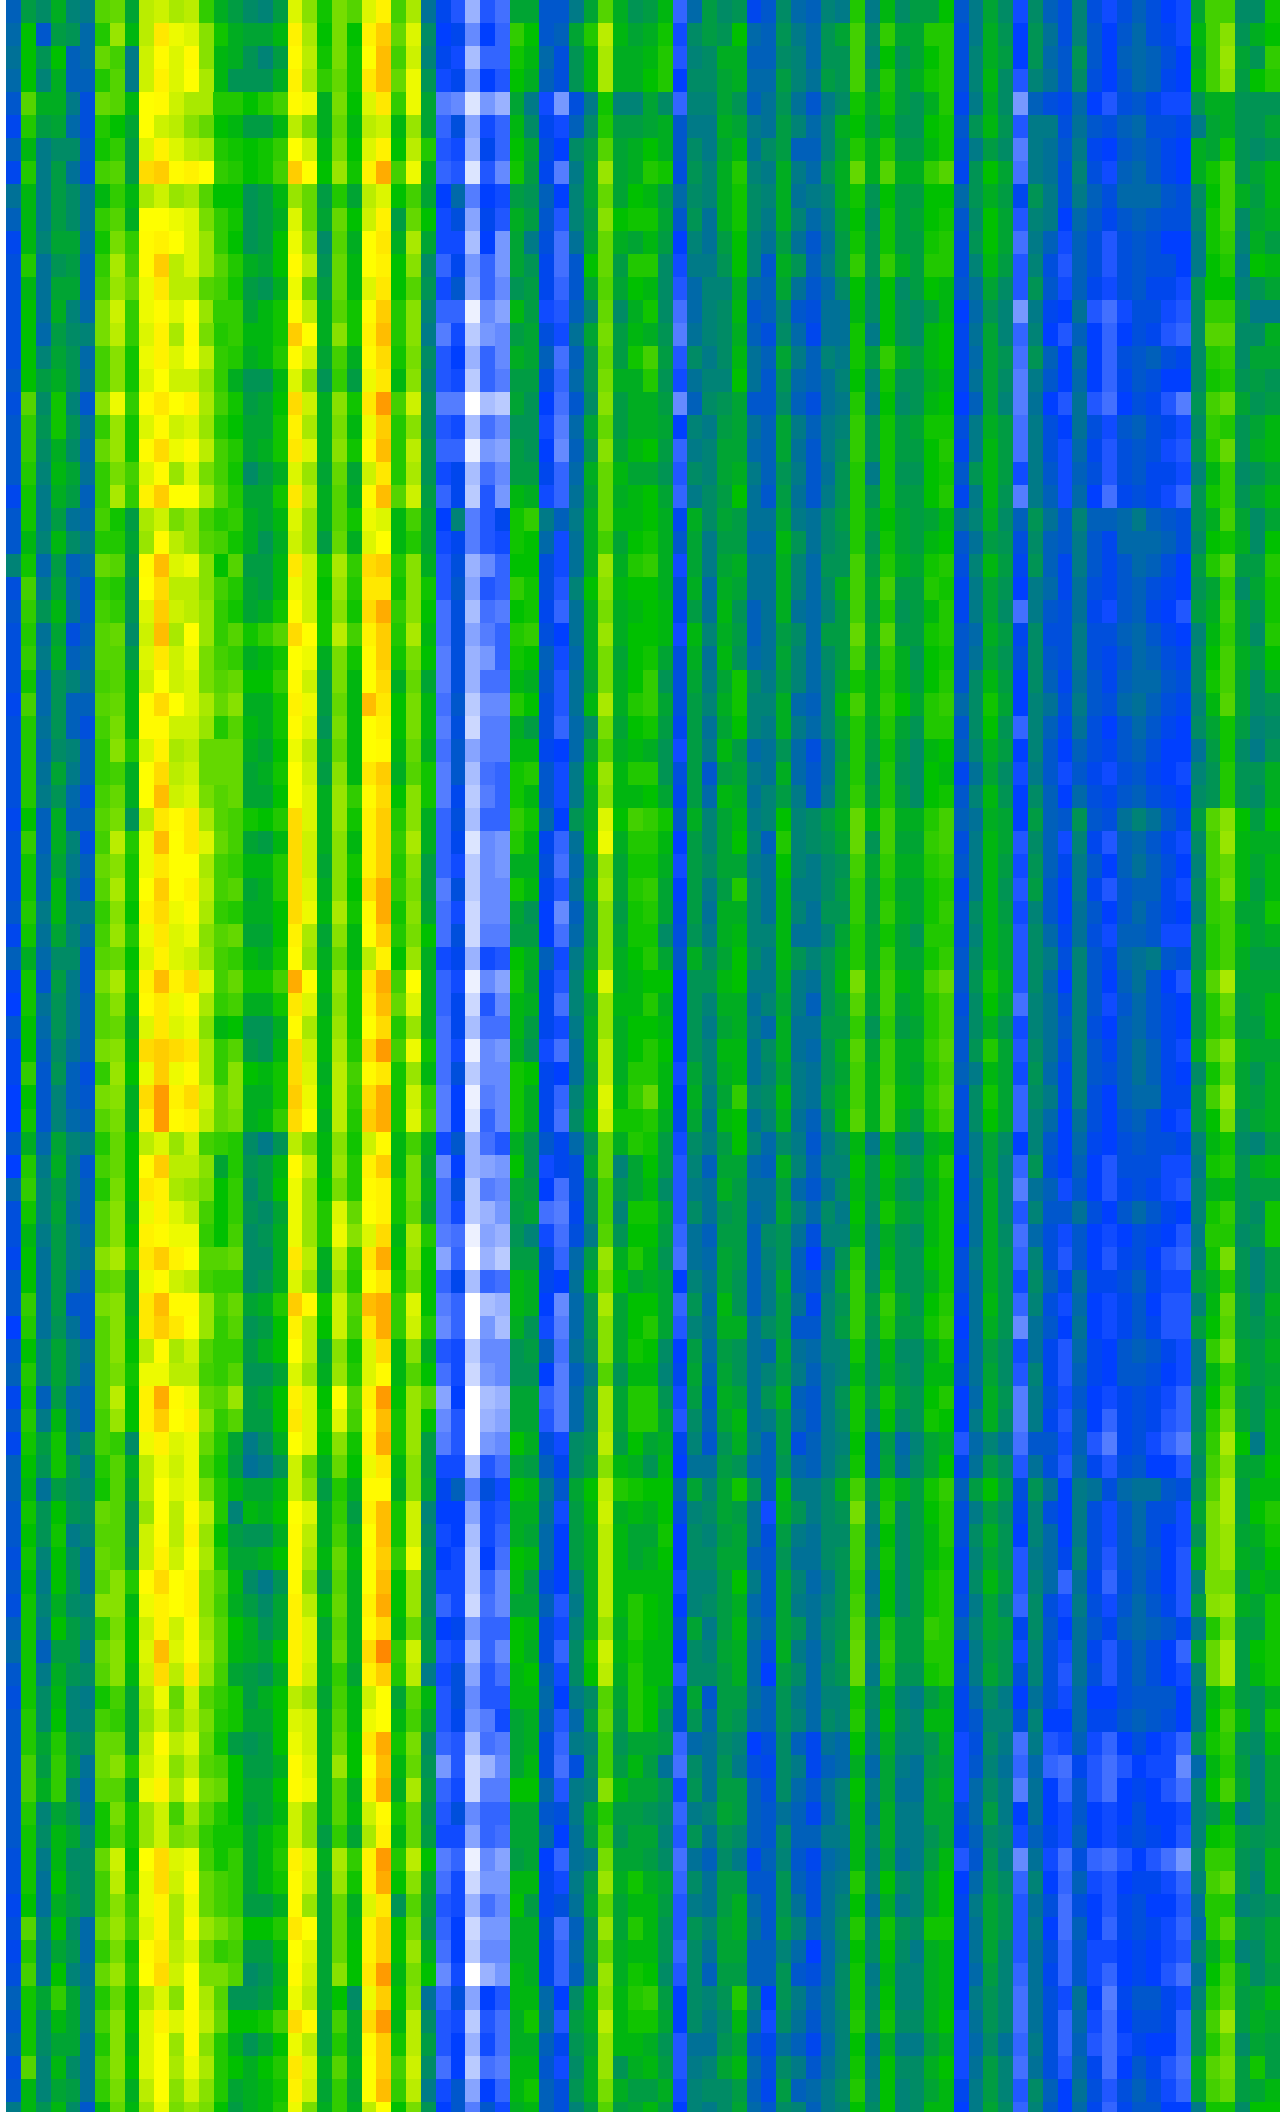

At4g10780  
At4g10690  
At3g56280  
At2g05200  
At5g28860  
At4g24980  
At5g54420  
At5g62830  
At5g28240  
At2g05930  
At5g28600  
At5g35830  
At2g07190  
At5g62160  
At2g36560  
At2g06960  
At3g44760  
At5g44850  
At2g10390  
At5g59190  
At2g11370  
At2g29920  
At4g07730  
At4g18860  
At1g34480  
At4g04110  
At3g42220  
At5g39370  
At4g09700  
At4g15060  
At1g43810  
At3g19160  
At5g35130  
At3g06280  
At2g43450  
At4g32695  
At2g10070  
At1g43730  
At2g18820  
At5g36280  
At3g61120  
At3g07250  
At1g78740  
At1g01450  
At4g08530  
At5g40050  
At1g40230  
At4g05620  
At2g07070  
At5g28220  
At3g02590  
At4g38070  
At5g02000  
At4g10370  
At1g63730  
At3g18700  
At1g35610  
At5g12240  
At3g43320  
At1g74620  
At1g35880  
At4g05260  
At5g24980  
At1g47520  
At5g20770  
At3g30827  
At3g45690  
At1g20860  
At2g04060  
At5g46310  
At4g07790  
At1g36620  
At5g39560  
At3g29265  
At1g35515  
At1g19160  
At1g15850  
At2g38690  
At4g04230  
At5g36990  
At1g54480  
At5g26100  
At2g15260  
At5g04400  
At5g28790  
At1g43680  
At5g56770  
At2g24255  
At3g44240  
At1g18200  
At5g27800  
At1g42460

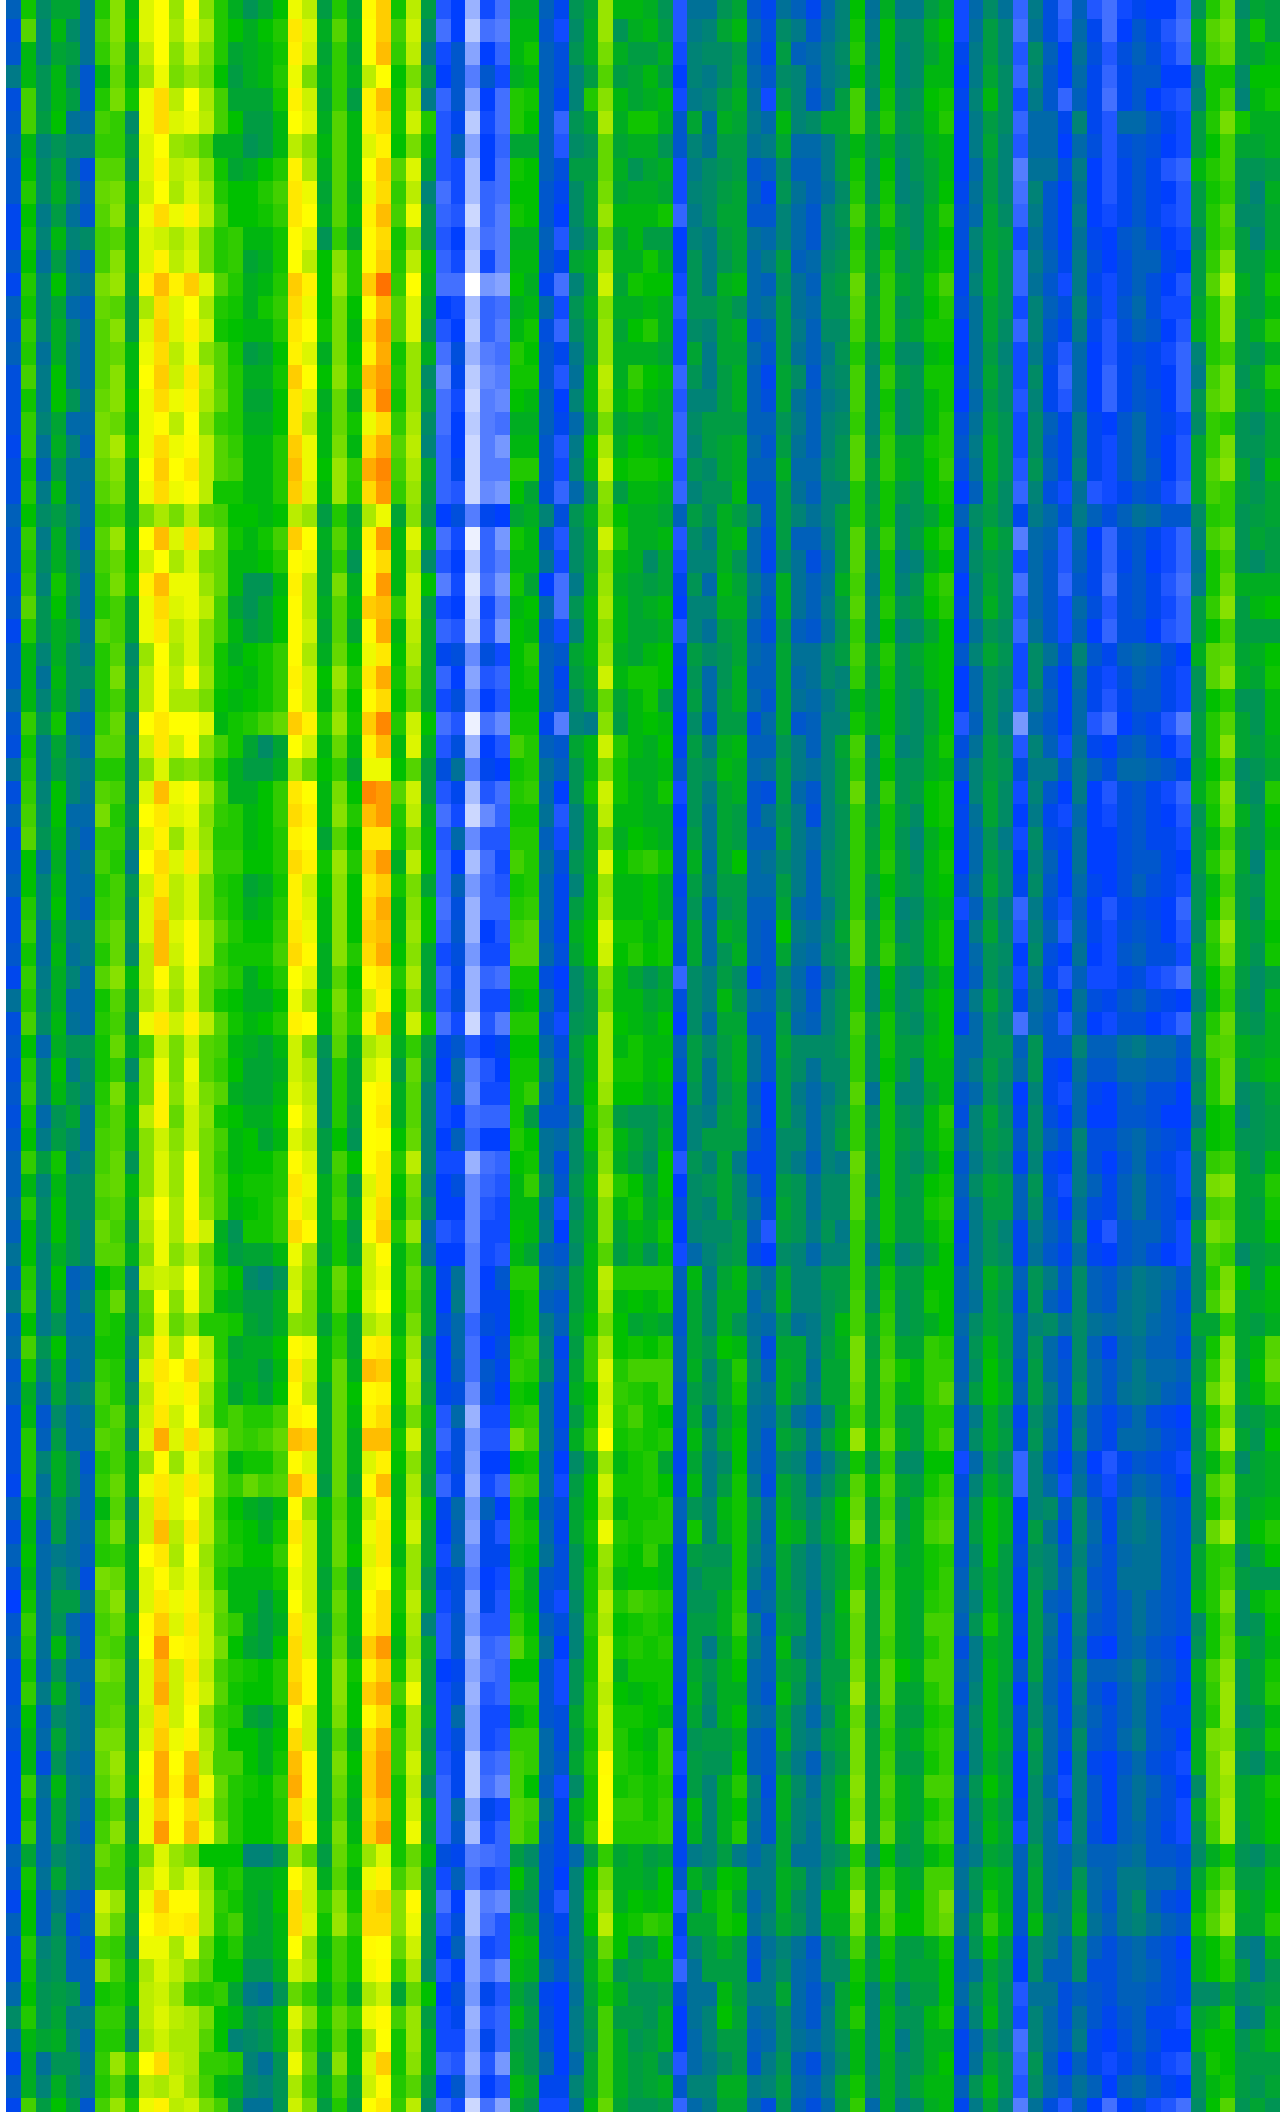

At3g44240  
At1g18200  
At5g27800  
At1g42460  
At4g13610  
At1g18130  
At2g38520  
At3g31320  
At3g42910  
At3g14030  
At4g03580  
At3g42600  
At2g06980  
At1g41870  
At1g59680  
At2g16000  
At5g11180  
At2g15540  
At2g11240  
At3g06870  
At5g33258  
At5g52975  
At3g32110  
At3g42820  
At3g31023  
At2g15750  
At3g31430  
At4g12220  
At1g26990  
At4g28130  
At3g58330  
At2g04490  
At5g47260  
At2g40310  
At3g55880  
At3g59610  
At3g42270  
At3g49150  
At5g37910  
At5g28800  
At5g20760  
At2g15380  
At1g26350  
At5g02730  
At5g45230  
At2g14540  
At4g05250  
At2g07760  
At1g09510  
At1g78220  
At4g07650  
At5g06500  
At2g35670  
At2g04750  
At2g20160  
At3g25630  
At4g24600  
At2g19140  
At1g01530  
At4g17130  
At1g47810  
At5g23180  
At3g59790  
At2g29600  
At5g41720  
At2g04920  
At1g49900  
At3g29380  
At5g55320  
At3g43280  
At3g57960  
At1g14520  
At4g09470  
At2g29860  
At4g04730  
At2g02520  
At1g22670  
At2g10740  
At2g27650  
At3g15910  
At5g32610  
At4g01490  
At1g78700  
At1g70910  
At2g03180  
At3g18540  
At2g46190  
At1g60450  
At3g16540  
At1g19410  
At1g37000  
At1g34070

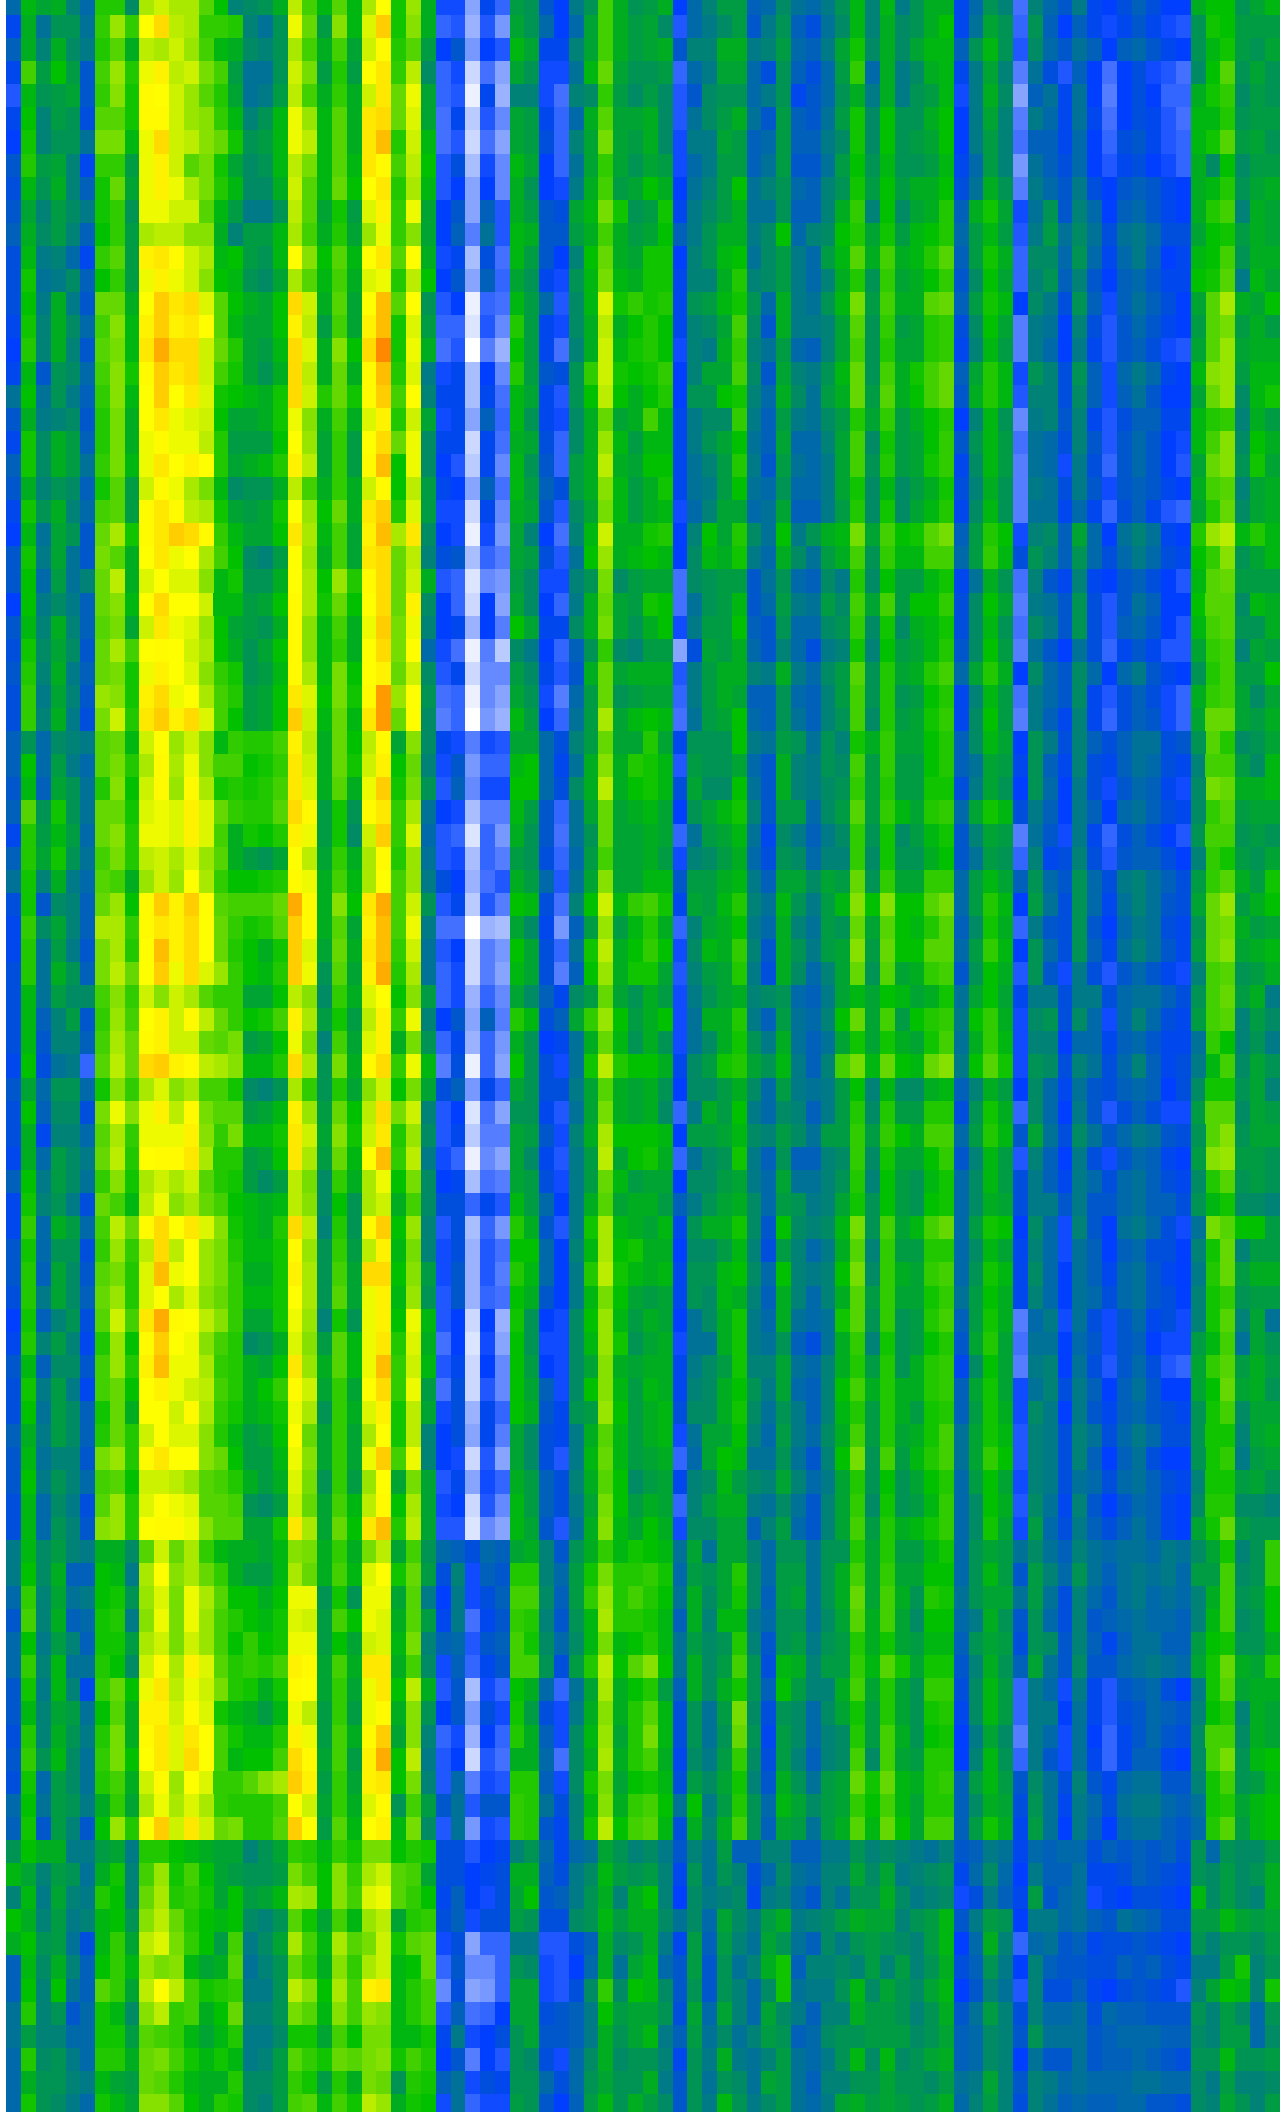

At3g16540  
At1g19410  
At1g37000  
At1g34070  
At2g20380  
At5g01860  
At4g39930  
At5g15060  
At2g34270  
At4g27220  
At1g38950  
At1g32270  
At1g43920  
At3g44180  
At5g08090  
At3g43900  
At1g31100  
At5g22680  
At3g22870  
At2g31420  
At3g20700  
At1g35617  
At4g17580  
At4g20310  
At3g17230  
At5g66220  
At4g31710  
At3g32260  
At3g31920  
At3g45110  
At5g52460  
At5g25860  
At2g29800  
At5g58810  
At1g43715  
At3g42730  
At1g11560  
At5g44970  
At5g48050  
At2g24840  
At2g33260  
At2g29780  
At5g11050  
At4g17710  
At3g52510  
At5g25415  
At5g51230  
At4g20220  
At2g04820  
At2g25565  
At2g05600  
At1g42450  
At3g59030  
At3g57440  
At1g36230  
At2g07240  
At2g02560  
At5g15380  
At5g07050  
At3g46360  
At1g74480  
At3g42700  
At2g25410  
At1g43010  
At4g07510  
At2g07720  
At2g04560  
At5g34450  
At1g04625  
At3g42220  
At1g01410  
At5g38390  
At1g54230  
At2g37730  
At4g27890  
At1g16940  
At1g10890  
At1g20940  
At1g33580  
At2g01840  
At3g18650  
At2g17680  
At3g16880  
At1g32880  
At3g62350  
At5g35150  
At2g12420  
At2g10500  
At1g41860  
At5g19810  
At2g04990  
At2g24880

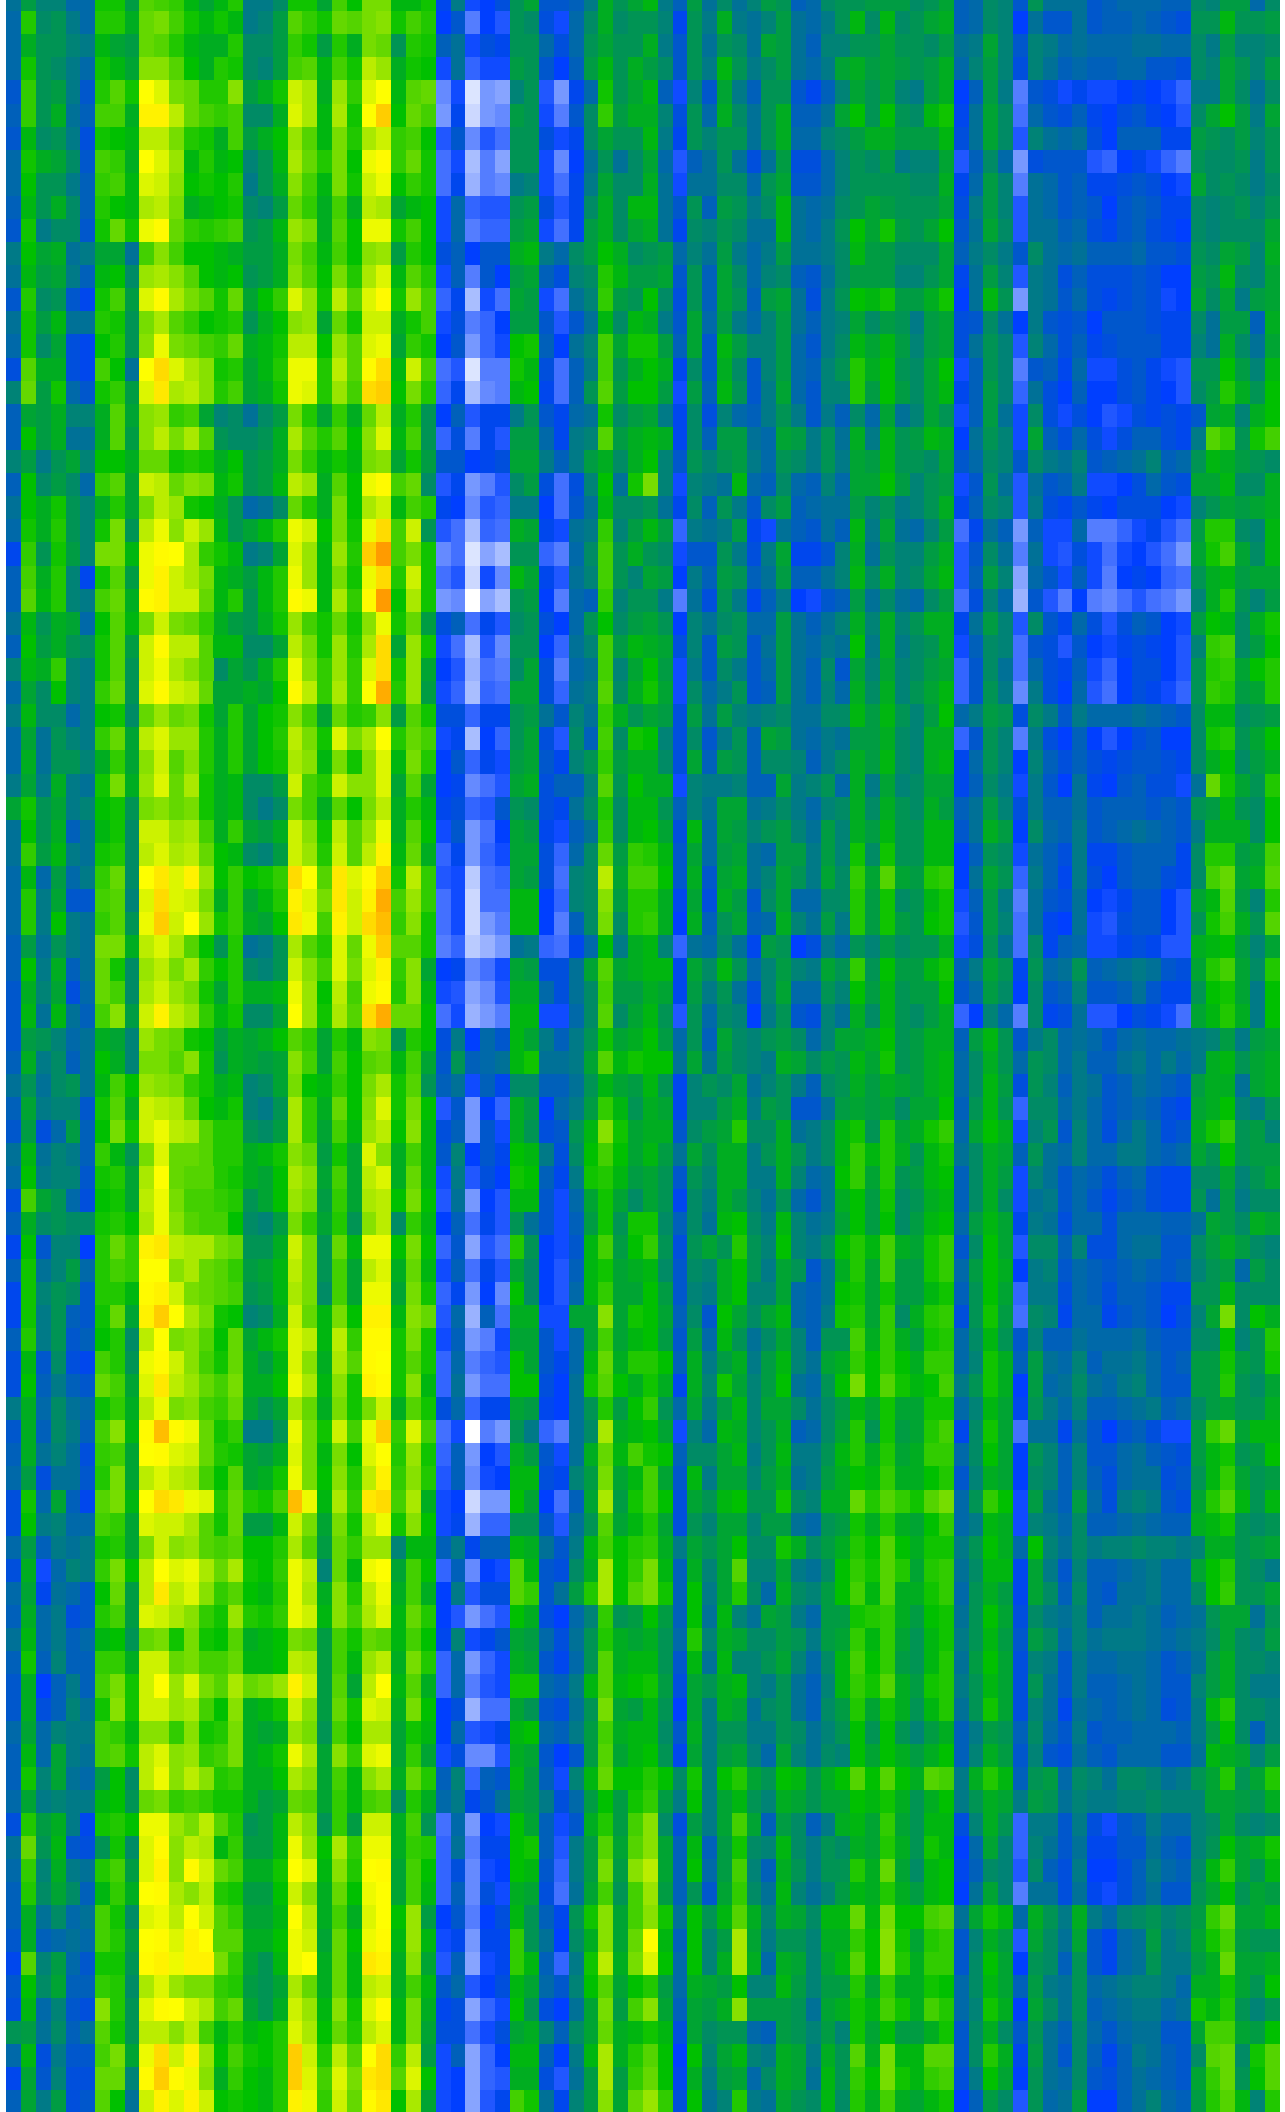

At1g41800  
At5g19810  
At2g04990  
At2g24880  
At3g09750  
At1g31210  
At3g32140  
At2g37830  
At3g06090  
At3g49280  
At2g13430  
At2g41580  
At5g61470  
At5g26640  
At2g14030  
At5g35710  
At3g18460  
At5g60320  
At3g50180  
At5g50140  
At3g23680  
At1g27240  
At2g02830  
At2g01960  
At4g16380  
At3g42070  
At1g49260  
At3g42380  
At2g02270  
At1g65850  
At4g07810  
At1g58450  
At1g44318  
At3g10990  
At5g06490  
At5g42640  
At1g34290  
At3g46350  
At2g38100  
At5g21120  
At1g26360  
At3g46910  
At4g08370  
At3g45910  
At3g22710  
At4g15310  
At1g47620  
At1g29110  
At4g33580  
At2g12210  
At1g50340  
At3g43050  
At5g46120  
At3g47140  
At4g33870  
At5g41450  
At2g02440  
At4g28170  
At5g45120  
At2g06950  
At3g27590  
At5g10880  
At1g42650  
At4g13570  
At1g40390  
At2g38150  
At4g03640  
At4g30040  
At2g34880  
At1g49810  
At5g18880  
At1g05920  
At2g11090  
At5g35890  
At3g09130  
At5g56070  
At3g44000  
At4g26040  
At4g11700  
At5g63900  
At2g34555  
At2g26940  
At1g20800  
At4g17200  
At4g20080  
At5g49260  
At5g17200  
At1g30800  
At1g61710  
At5g27910  
At5g55780  
At1g06320



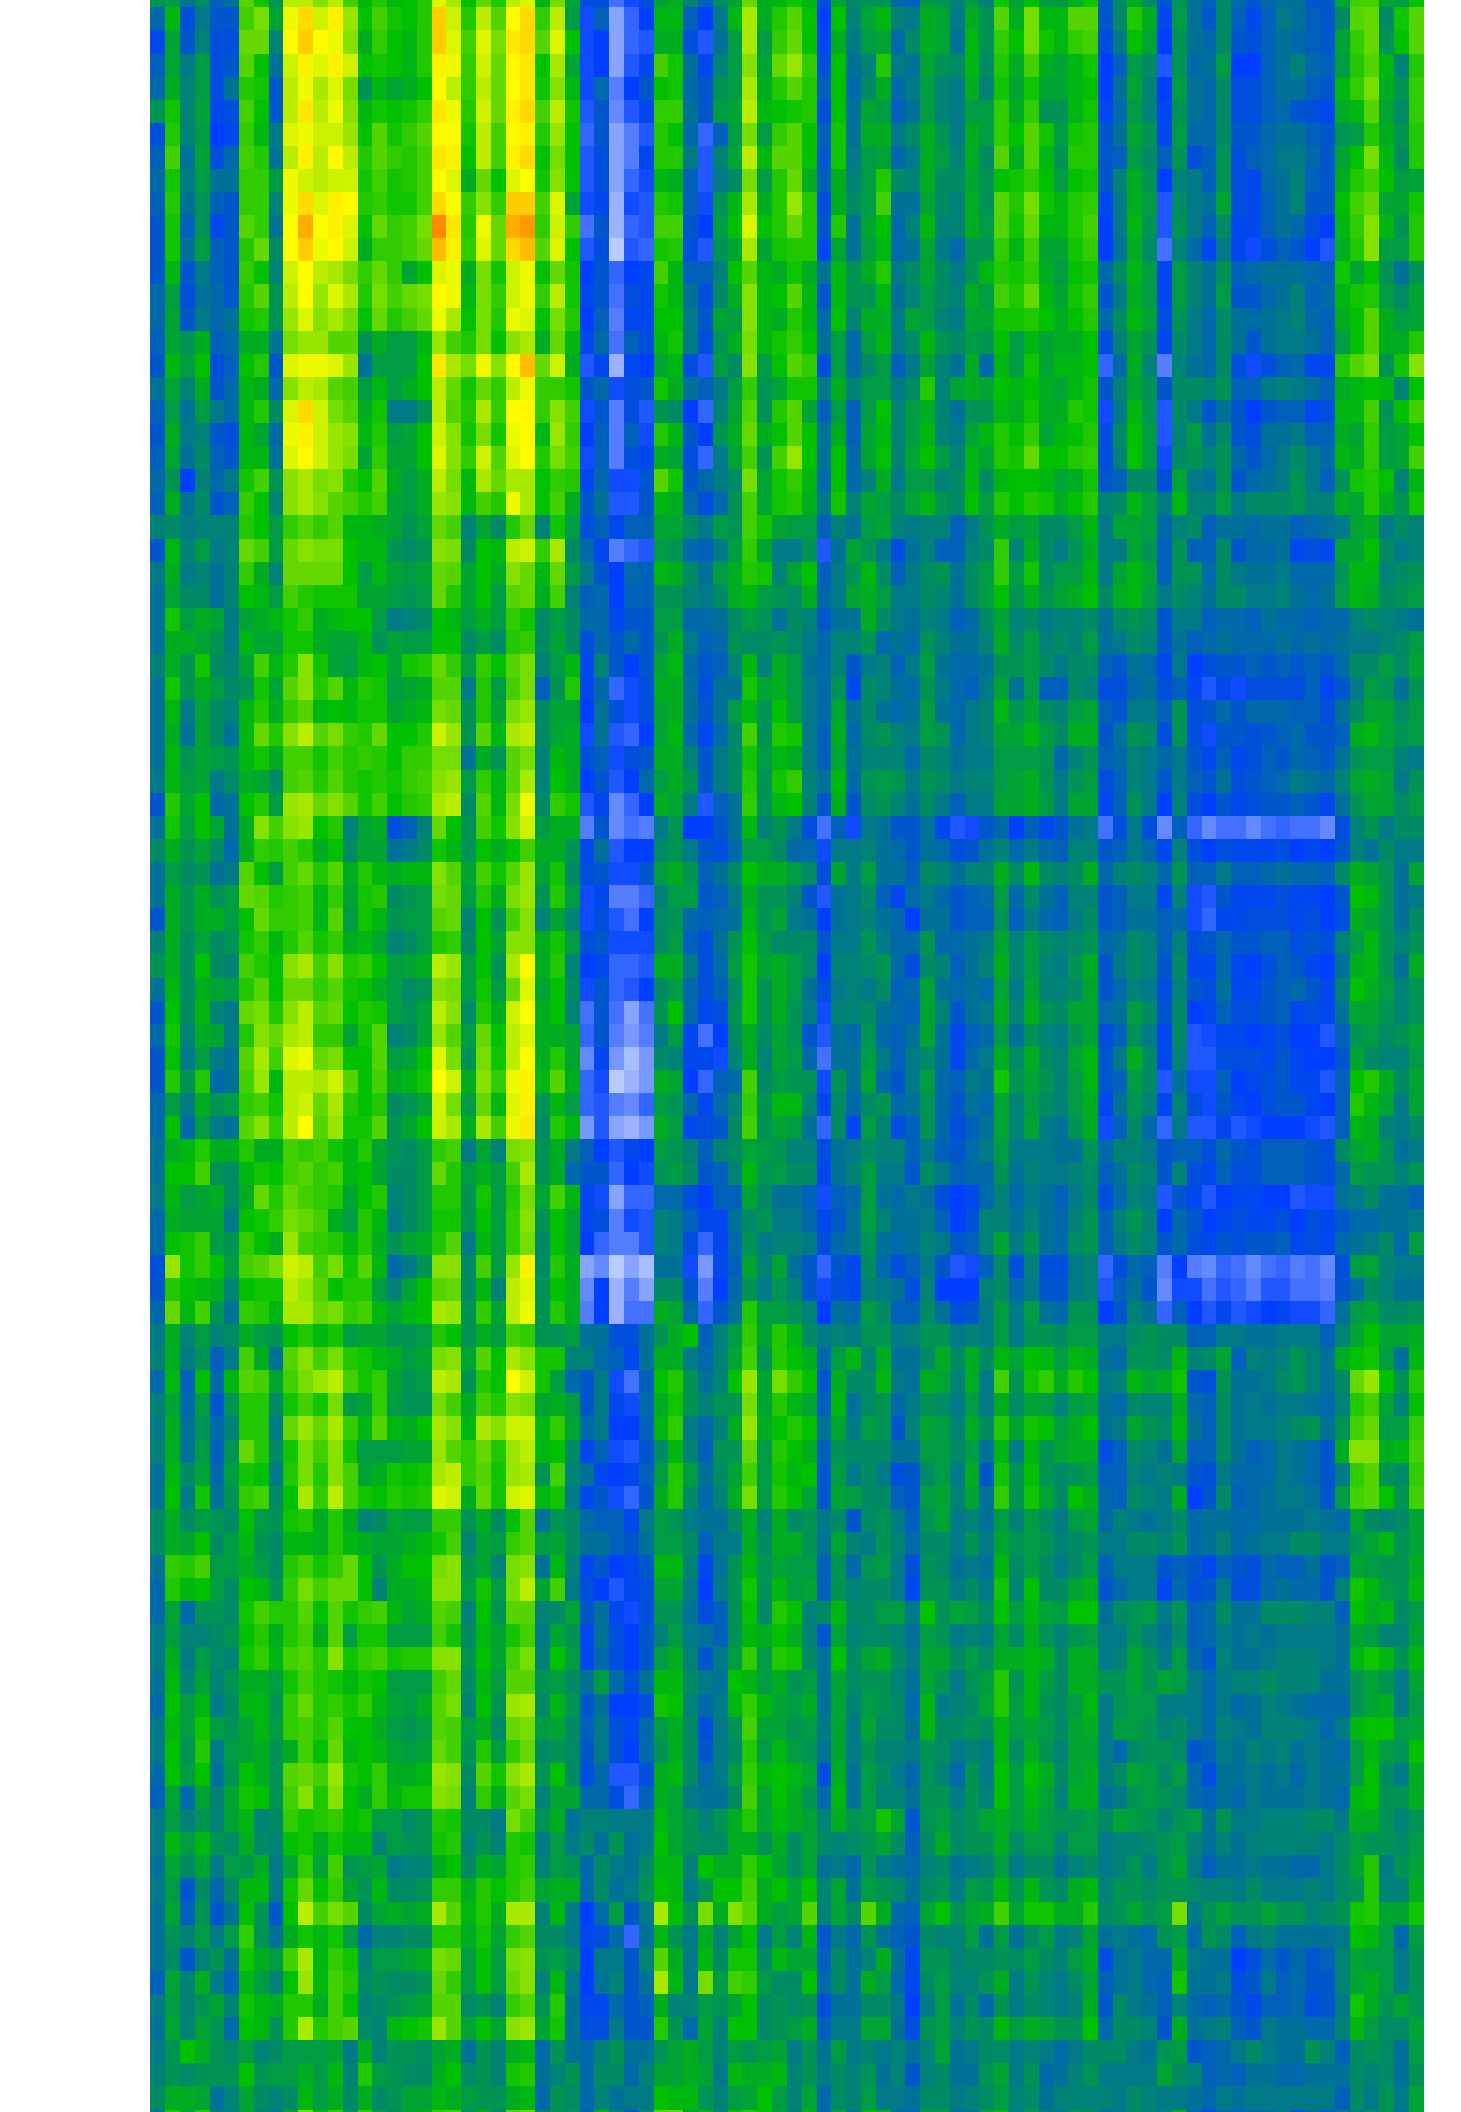

At5g27910  
At5g55780  
At1g06320  
At2g27375  
At1g22290  
At1g43220  
At3g57970  
At1g54190  
At1g70110  
At2g35460  
At1g56270  
At2g31100  
At2g25360  
At4g13320  
At4g33710  
At3g45720  
At4g12180  
At1g14690  
At5g66340  
At4g23970  
At5g05150  
At3g32960  
At5g37520  
At2g19100  
At1g35500  
At4g05280  
At3g56380  
At2g07730  
At2g19360  
At3g25490  
At2g11235  
At5g35230  
At2g21310  
At4g00232  
At1g21300  
At3g43290  
At3g42460  
At1g66030  
At3g28310  
At5g59105  
At5g48205  
At1g31000  
At1g60350  
At3g25200  
At2g46910  
At4g07740  
At2g14390  
At4g23090  
At3g30280  
At5g38950  
At2g11830  
At5g60290  
At5g46670  
At1g71390  
At1g57850  
At5g02990  
At1g65360  
At3g19350  
At1g60985  
At1g28135  
At5g04210  
At5g15420  
At1g75720  
At1g56160  
At5g12390  
At4g29620  
At5g35010  
At5g42910  
At2g03560  
At4g04170  
At3g42680  
At3g44910  
At4g07890  
At1g47885  
At1g51290  
At1g15590  
At5g30545  
At4g18870  
At2g19630  
At2g02490  
At3g26120  
At2g24950  
At3g19500  
At3g52970  
At1g27080  
At1g28030  
At1g11070  
At1g16980  
At3g60560  
At3g31314  
At1g43870

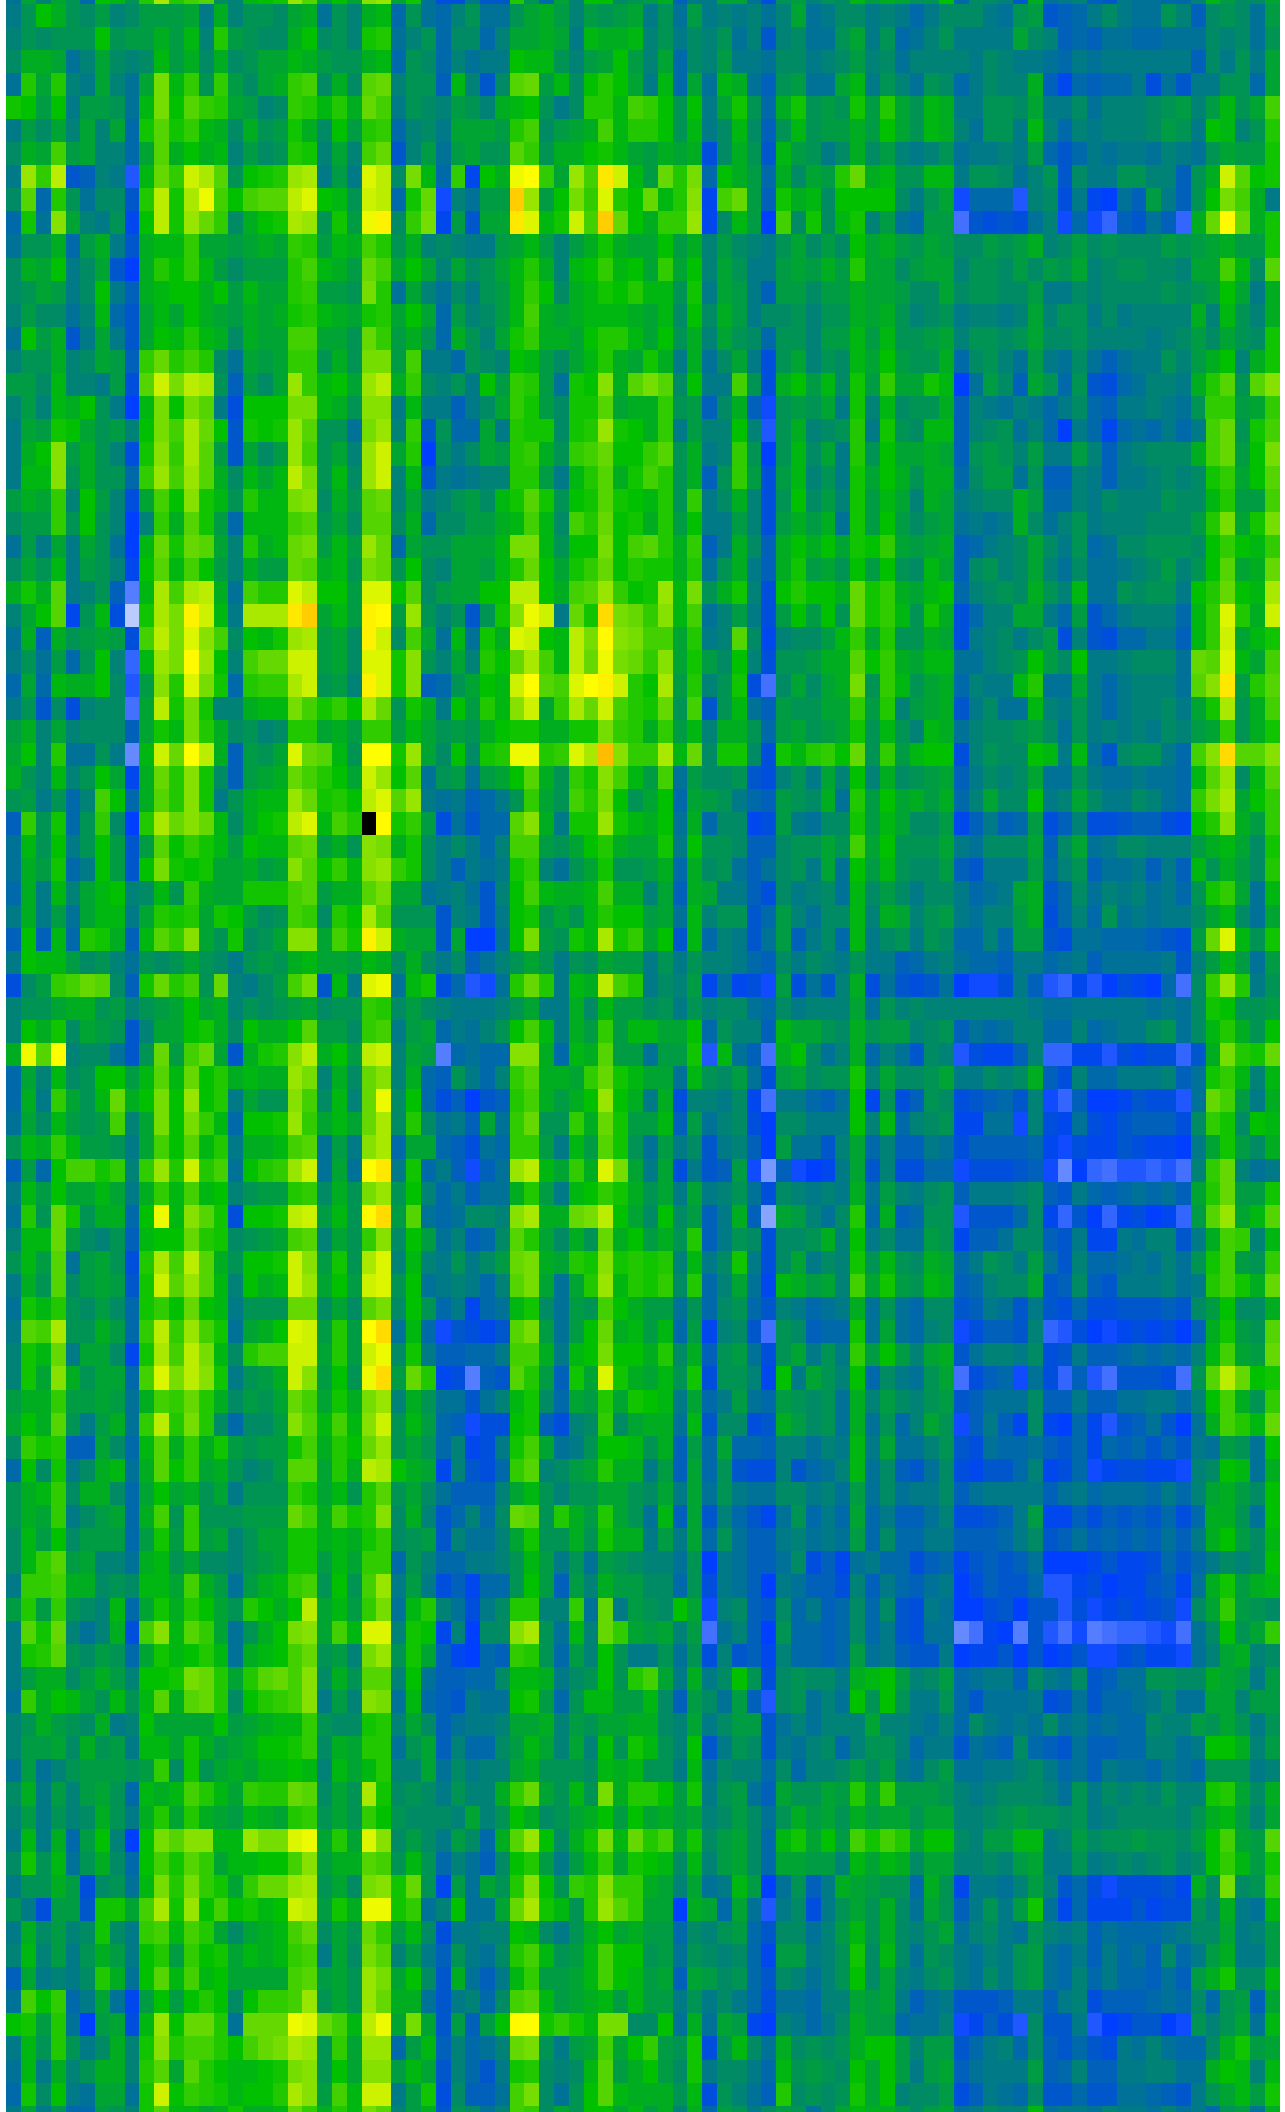

At3g60560  
At3g31314  
At1g43870  
At4g07640  
At5g09940  
At3g30740  
At3g44030  
At1g76940  
At1g69430  
At2g21930  
At3g30150  
At4g08270  
At3g42420  
At2g12920  
At2g40210  
At5g56830  
At2g34555  
At3g45130  
At1g31520  
At2g05890  
At4g07450  
At5g34840  
At3g56520  
At2g13950  
At1g50080  
At4g22700  
At1g71800  
At2g27790  
At3g61160  
At4g35870  
At2g18070  
At1g36430  
At5g17680  
At3g26040  
At5g14830  
At5g63370  
At1g33710  
At4g26250  
At3g31915  
At5g26970  
At5g21020  
At2g07430  
At5g52880  
At1g66860  
At1g79610  
At4g29440  
At2g11930  
At4g18410  
At5g44760  
At1g05800  
At1g55280  
At5g35270  
At3g51180  
At1g54470  
At1g65170  
At4g07360  
At1g42570  
At1g40150  
At4g03850  
At1g02250  
At1g77830  
At1g80590  
At1g36130  
At4g08090  
At1g34170  
At2g01550  
At3g06000  
At3g28400  
At4g01530  
At5g60260  
At5g54950  
At5g28670  
At5g38080  
At2g28090  
At1g66490  
At1g33817  
At1g35380  
At3g60920  
At5g54220  
At1g70040  
At1g43320  
At3g58050  
At5g53430  
At5g37730  
At2g21740  
At3g42400  
At2g19290  
At4g34310  
At5g53840  
At2g10650  
At1g36756

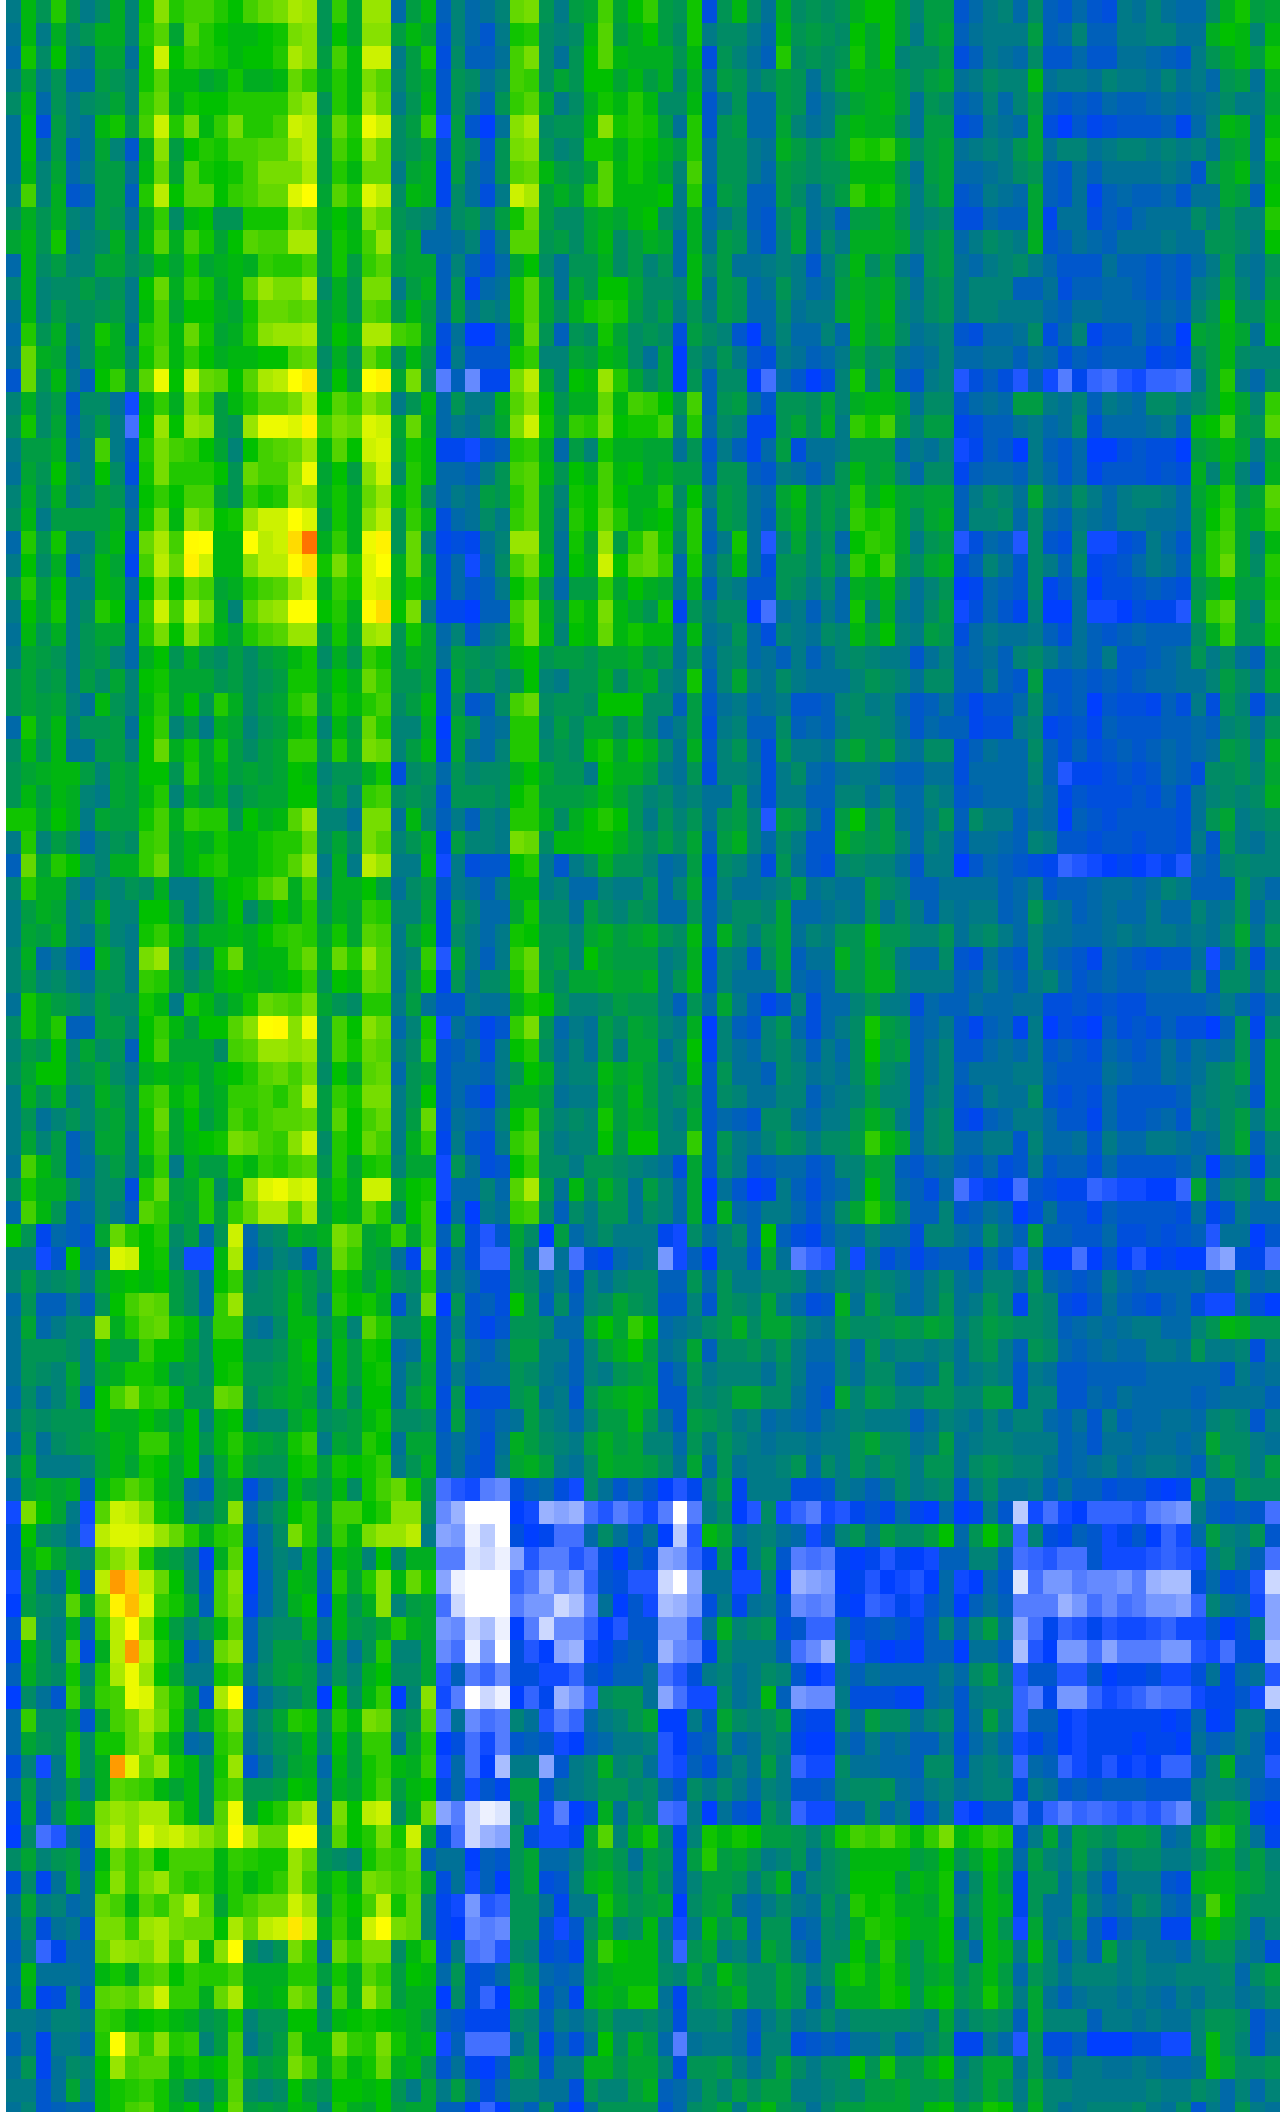

At5g53840  
At2g10650  
At1g36756  
At3g14480  
At3g31930  
At1g66720  
At2g25040  
At4g07920  
At2g15660  
At4g17700  
At4g03630  
At2g14300  
At2g01920  
At4g25510  
At5g22900  
At1g42393  
At2g18270  
At2g34230  
At3g46240  
At5g56470  
At1g34660  
At3g32150  
At1g52840  
At1g35410  
At2g23160  
At2g07500  
At5g20560  
At3g42260  
At1g35150  
At5g53680  
At3g19700  
At1g42250  
At3g43730  
At2g06660  
At3g28870  
At3g15860  
At3g46860  
At5g28700  
At1g41825  
At2g11550  
At3g30490  
At1g37060  
At3g27990  
At1g18220  
At1g55600  
At2g13760  
At4g03670  
At3g47130  
At5g30420  
At4g05140  
At5g35280  
At4g35710  
At3g44040  
At1g20390  
At3g52340  
At2g27870  
At1g33640  
At5g15580  
At2g25230  
At1g39430  
At4g36210  
At1g43880  
At4g23110  
At5g47280  
At1g53510  
At5g55630  
At5g53500  
At3g06470  
At5g35100  
At4g00895  
At2g23130  
At5g64480  
At3g32160  
At3g09250  
At3g14490  
At3g01880  
At2g01870  
At2g35580  
At1g33330  
At4g08240  
At5g49380  
At3g24850  
At1g34080  
At2g44570  
At2g26870  
At1g46696  
At3g16130  
At2g34890  
At3g47170  
At1g62530  
At3g44980  
At2g20240

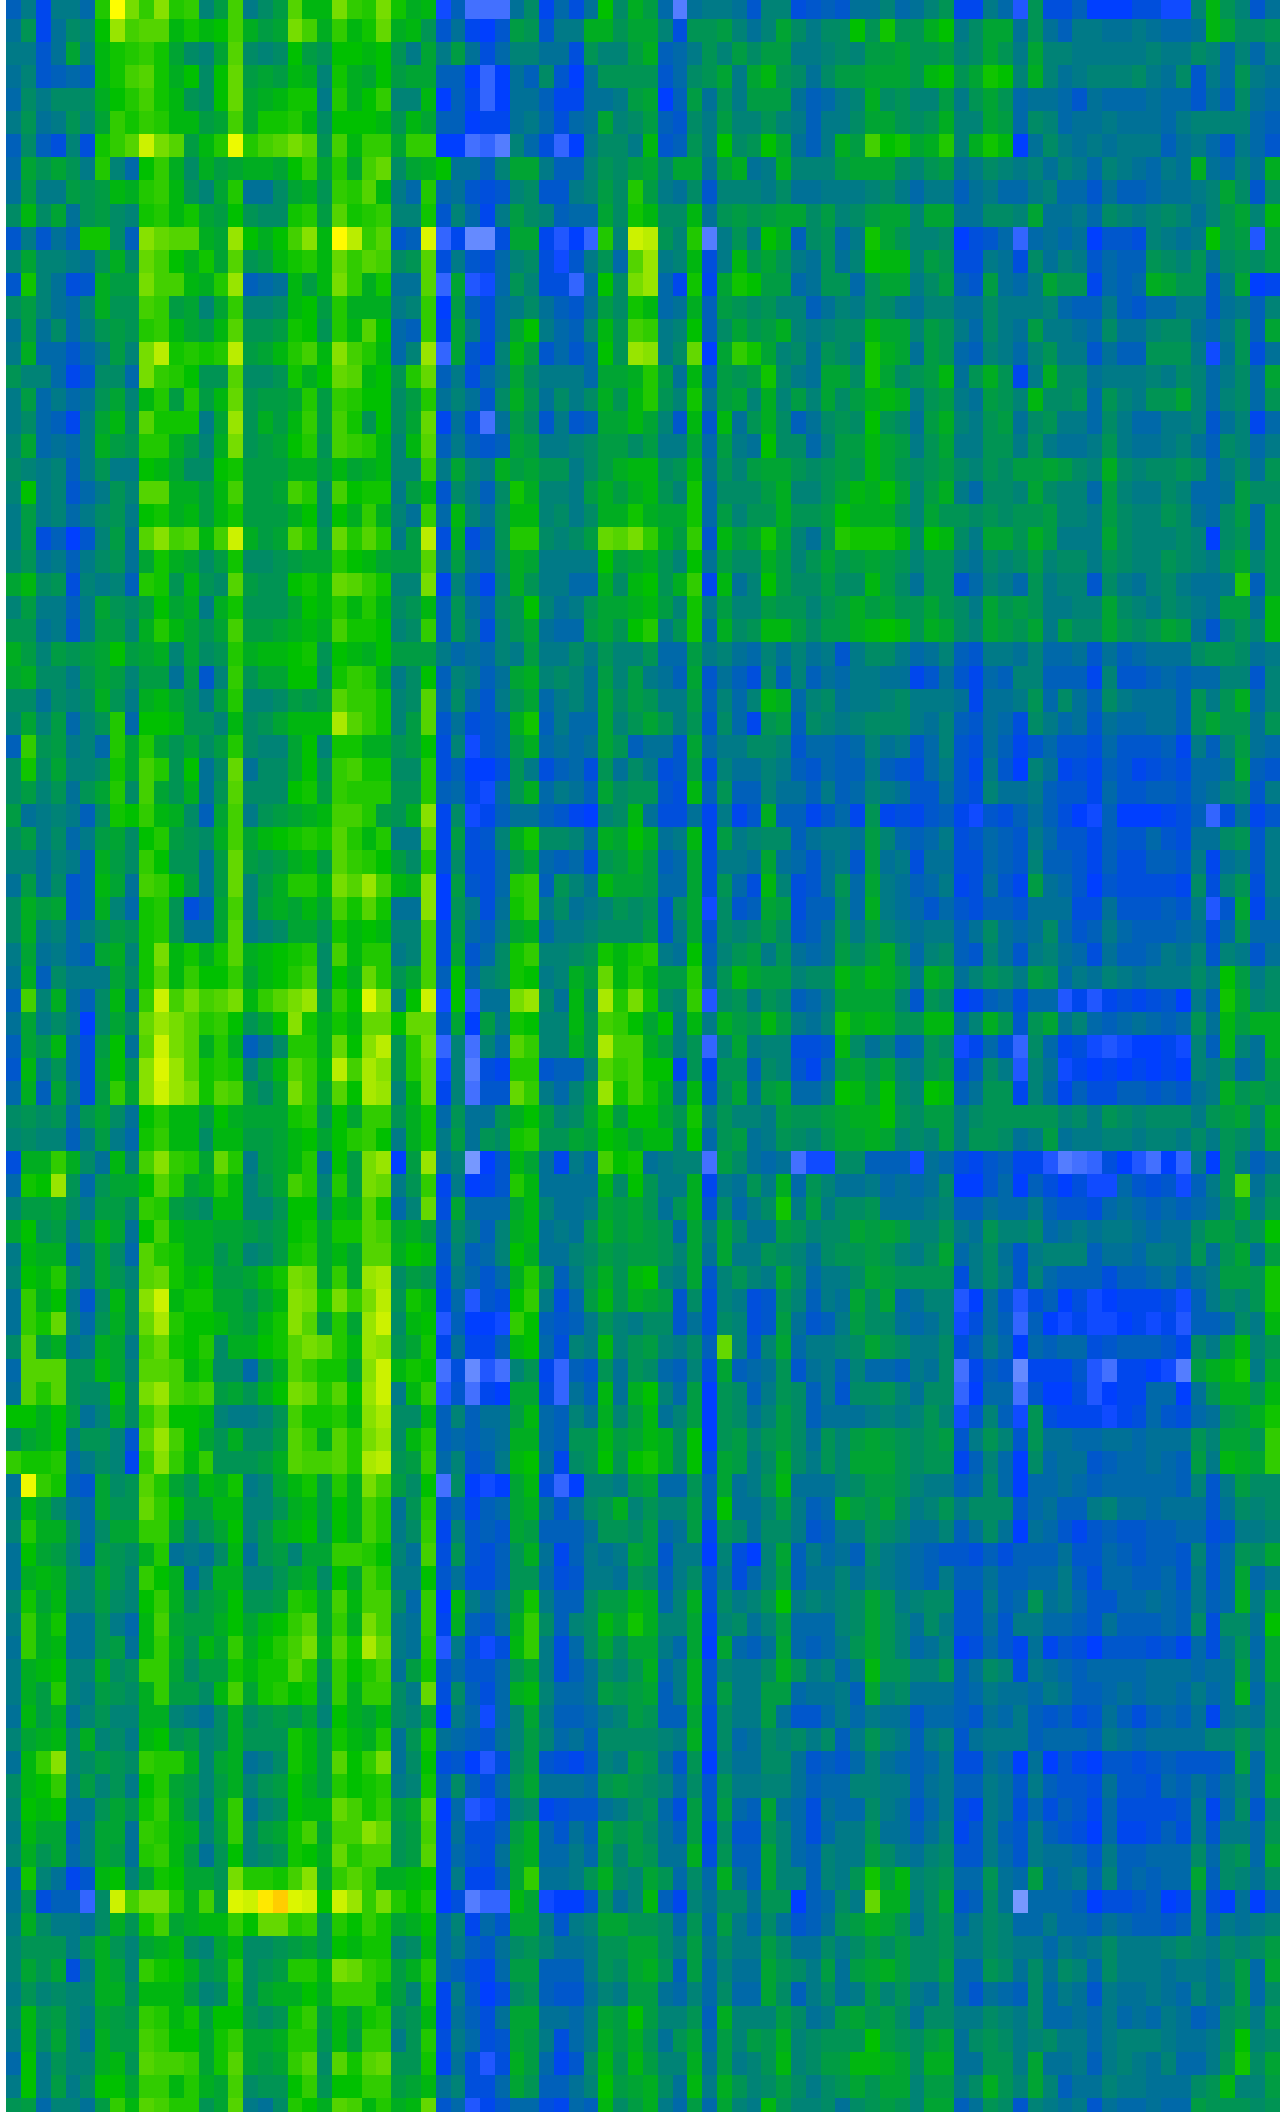

At3g47170  
At1g62530  
At3g44980  
At3g30240  
At5g52130  
At2g13500  
At4g22030  
At4g19000  
At4g05600  
At3g05780  
At4g21105  
At5g27580  
At4g03710  
At3g43770  
At1g14810  
At1g65110  
At5g28440  
At4g29090  
At1g65940  
At5g29210  
At4g15590  
At1g46336  
At1g78470  
At1g71490  
At1g38340  
At4g07600  
At2g10090  
At5g56330  
At3g16970  
At3g32280  
At2g23920  
At3g28320  
At4g08190  
At1g23910  
At4g08030  
At2g10400  
At4g20940  
At2g26620  
At1g72600  
At3g50720  
At1g48010  
At4g22800  
At3g16680  
At5g05430  
At1g24706  
At1g04860  
At1g70080  
At5g39640  
At3g24260  
At5g18160  
At1g07390  
At5g54350  
At4g08710  
At2g04580  
At2g01280  
At1g28460  
At2g37780  
At4g31960  
At5g46010  
At1g18350  
At1g21312  
At1g77890  
At2g07300  
At2g18200  
At2g20350  
At2g40050  
At5g39070  
At5g57730  
At3g28520  
At4g07830  
At1g35480  
At2g34800  
At1g35663  
At4g20250  
At5g36080  
At5g61050  
At5g17950  
At3g43330  
At3g43040  
At2g16010  
At2g15610  
At1g41795  
At5g17780  
At3g43420  
At5g37880  
At1g28630  
At1g37010  
At1g35740  
At2g26320  
At2g05010  
At1g42420  
At4g07380

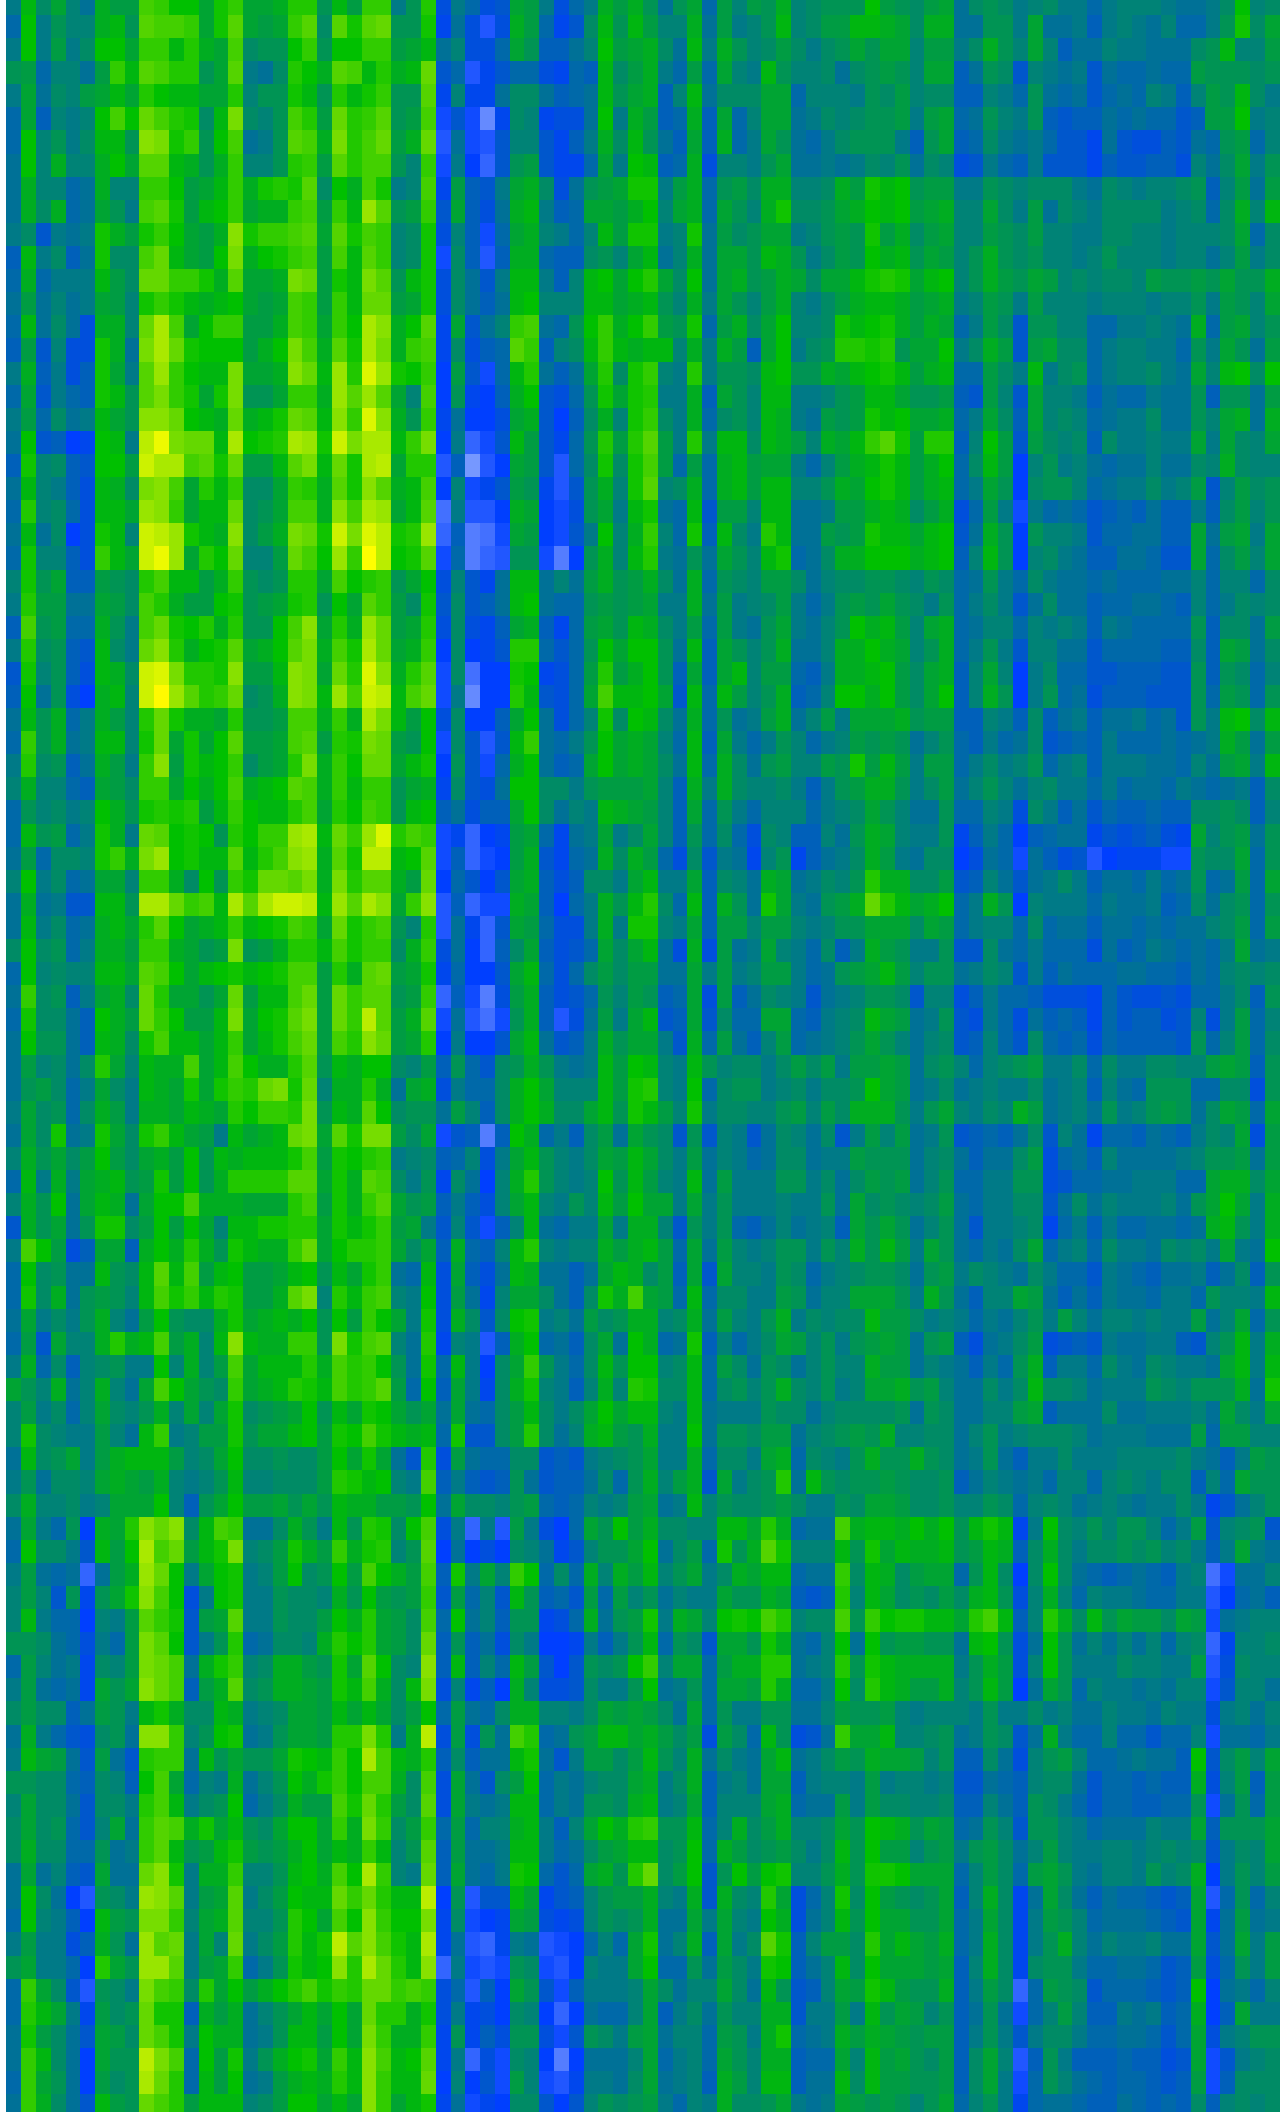

At2g26320  
At2g05010  
At1g42420  
At4g07380  
At1g63280  
At5g04030  
At2g10465  
At4g09540  
At1g49190  
At3g42710  
At2g22350  
At1g20970  
At1g57780  
At3g43170  
At5g64590  
At1g54955  
At1g31370  
At3g42080  
At4g07480  
At5g56110  
At5g65580  
At3g42110  
At2g10690  
At2g07280  
At4g08490  
At3g54570  
At4g08880  
At4g13380  
At1g50760  
At1g42580  
At5g14900  
At5g66370  
At5g37080  
At3g31300  
At3g45250  
At3g24060  
At3g49450  
At5g67000  
At2g02640  
At5g38440  
At3g45560  
At3g43100  
At5g37330  
At5g29060  
At5g02900  
At1g42190  
At1g67855  
At3g32300  
At2g07630  
At1g28300  
At2g36700  
At2g12870  
At3g42590  
At4g07620  
At1g41797  
At5g62110  
At2g10460  
At1g35900  
At2g06230  
At3g43140  
At3g11800  
At2g28030  
At2g30925  
At2g13310  
At2g14330  
At3g30710  
At1g77405  
At1g28690  
At5g33390  
At3g43660  
At2g36030  
At2g14430  
At4g07940  
At4g19580  
At4g04100  
At5g48860  
At5g35310  
At3g43020  
At4g07600  
At2g35080  
At3g23040  
At4g03040  
At2g18610  
At3g43020  
At2g07505  
At2g30570  
At5g38500  
At5g32400  
At2g14350  
At1g68700  
At3g44440  
At5g28270

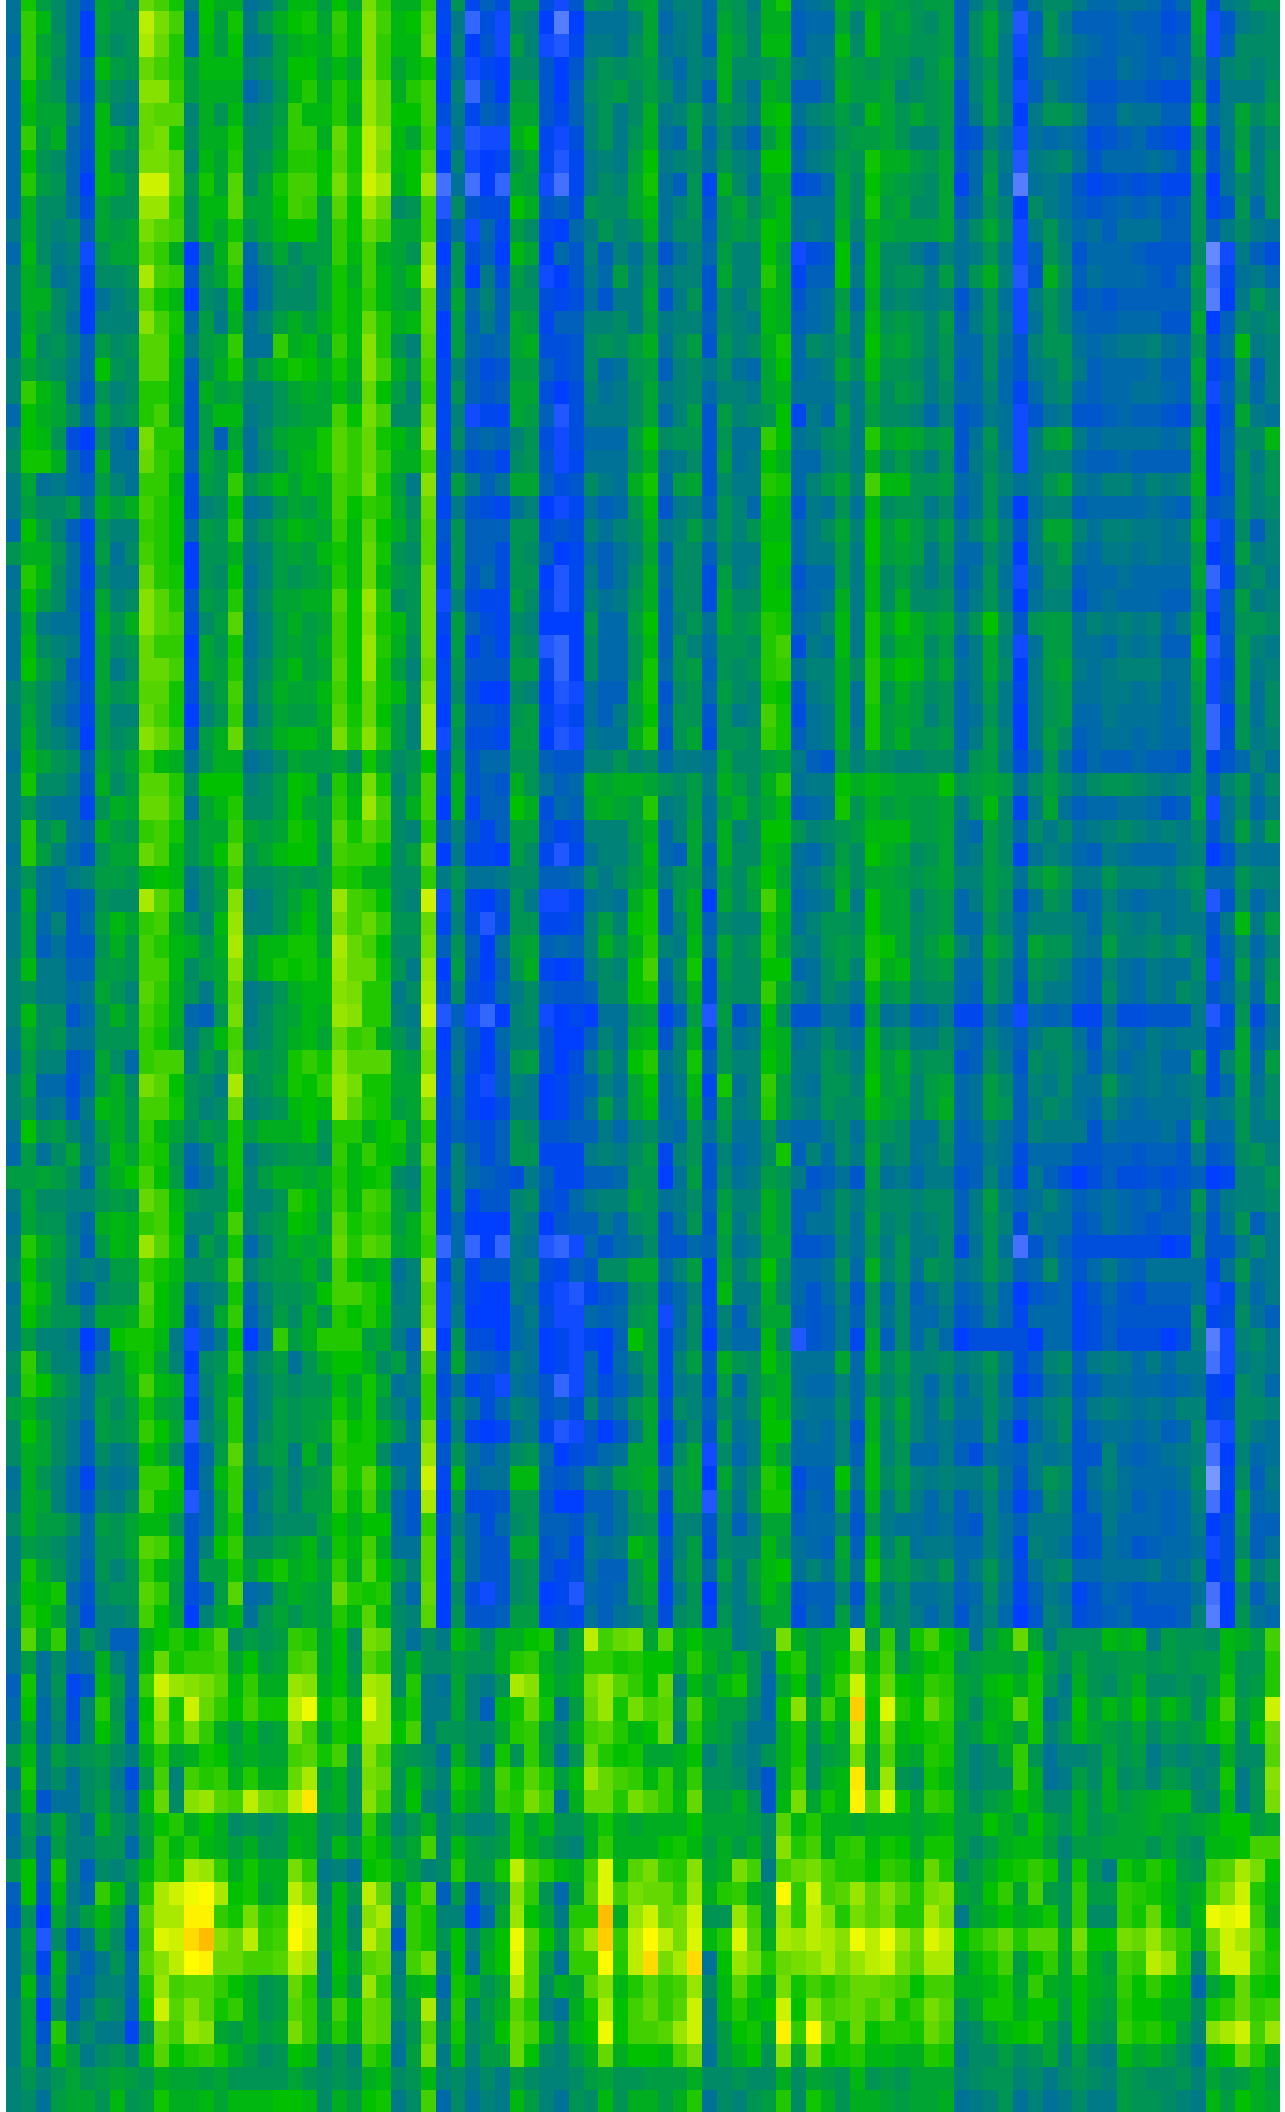

At2g14330  
At1g68700  
At3g44440  
At5g28270  
At2g29250  
At3g30330  
At3g24710  
At2g11680  
At2g07660  
At3g29080  
At2g16835  
At1g15830  
At1g68725  
At3g22140  
At1g64560  
At5g12450  
At2g07380  
At1g64940  
At2g04600  
At3g14510  
At2g06500  
At3g24400  
At2g14020  
At5g54460  
At1g34400  
At5g32510  
At3g46380  
At3g56590  
At5g35260  
At1g11690  
At1g36440  
At1g15840  
At2g10870  
At3g14670  
At4g23780  
At5g14550  
At5g29030  
At5g30520  
At3g42480  
At2g14420  
At2g10620  
At4g16910  
At3g31410  
At1g36100  
At2g06190  
At2g33030  
At5g34460  
At3g24790  
At4g07840  
At5g09930  
At4g00190  
At4g07850  
At2g13720  
At4g40090  
At4g10880  
At1g03490  
At3g57900  
At2g05500  
At1g35570  
At2g15930  
At3g50295  
At4g31280  
At5g43470  
At1g44990  
At3g03400  
At3g27800  
At1g32040  
At1g32030  
At2g39520  
At3g58080  
At4g08660  
At4g19620  
At4g27190  
At3g58870  
At4g09690  
At1g35614  
At5g34870  
At5g48770  
At3g63100  
At1g60020  
At1g52630  
At4g10950  
At1g51390  
At4g38480  
At1g30660  
At2g07683  
At4g04530  
At5g27170  
At2g05660  
At1g33130  
At2g26630

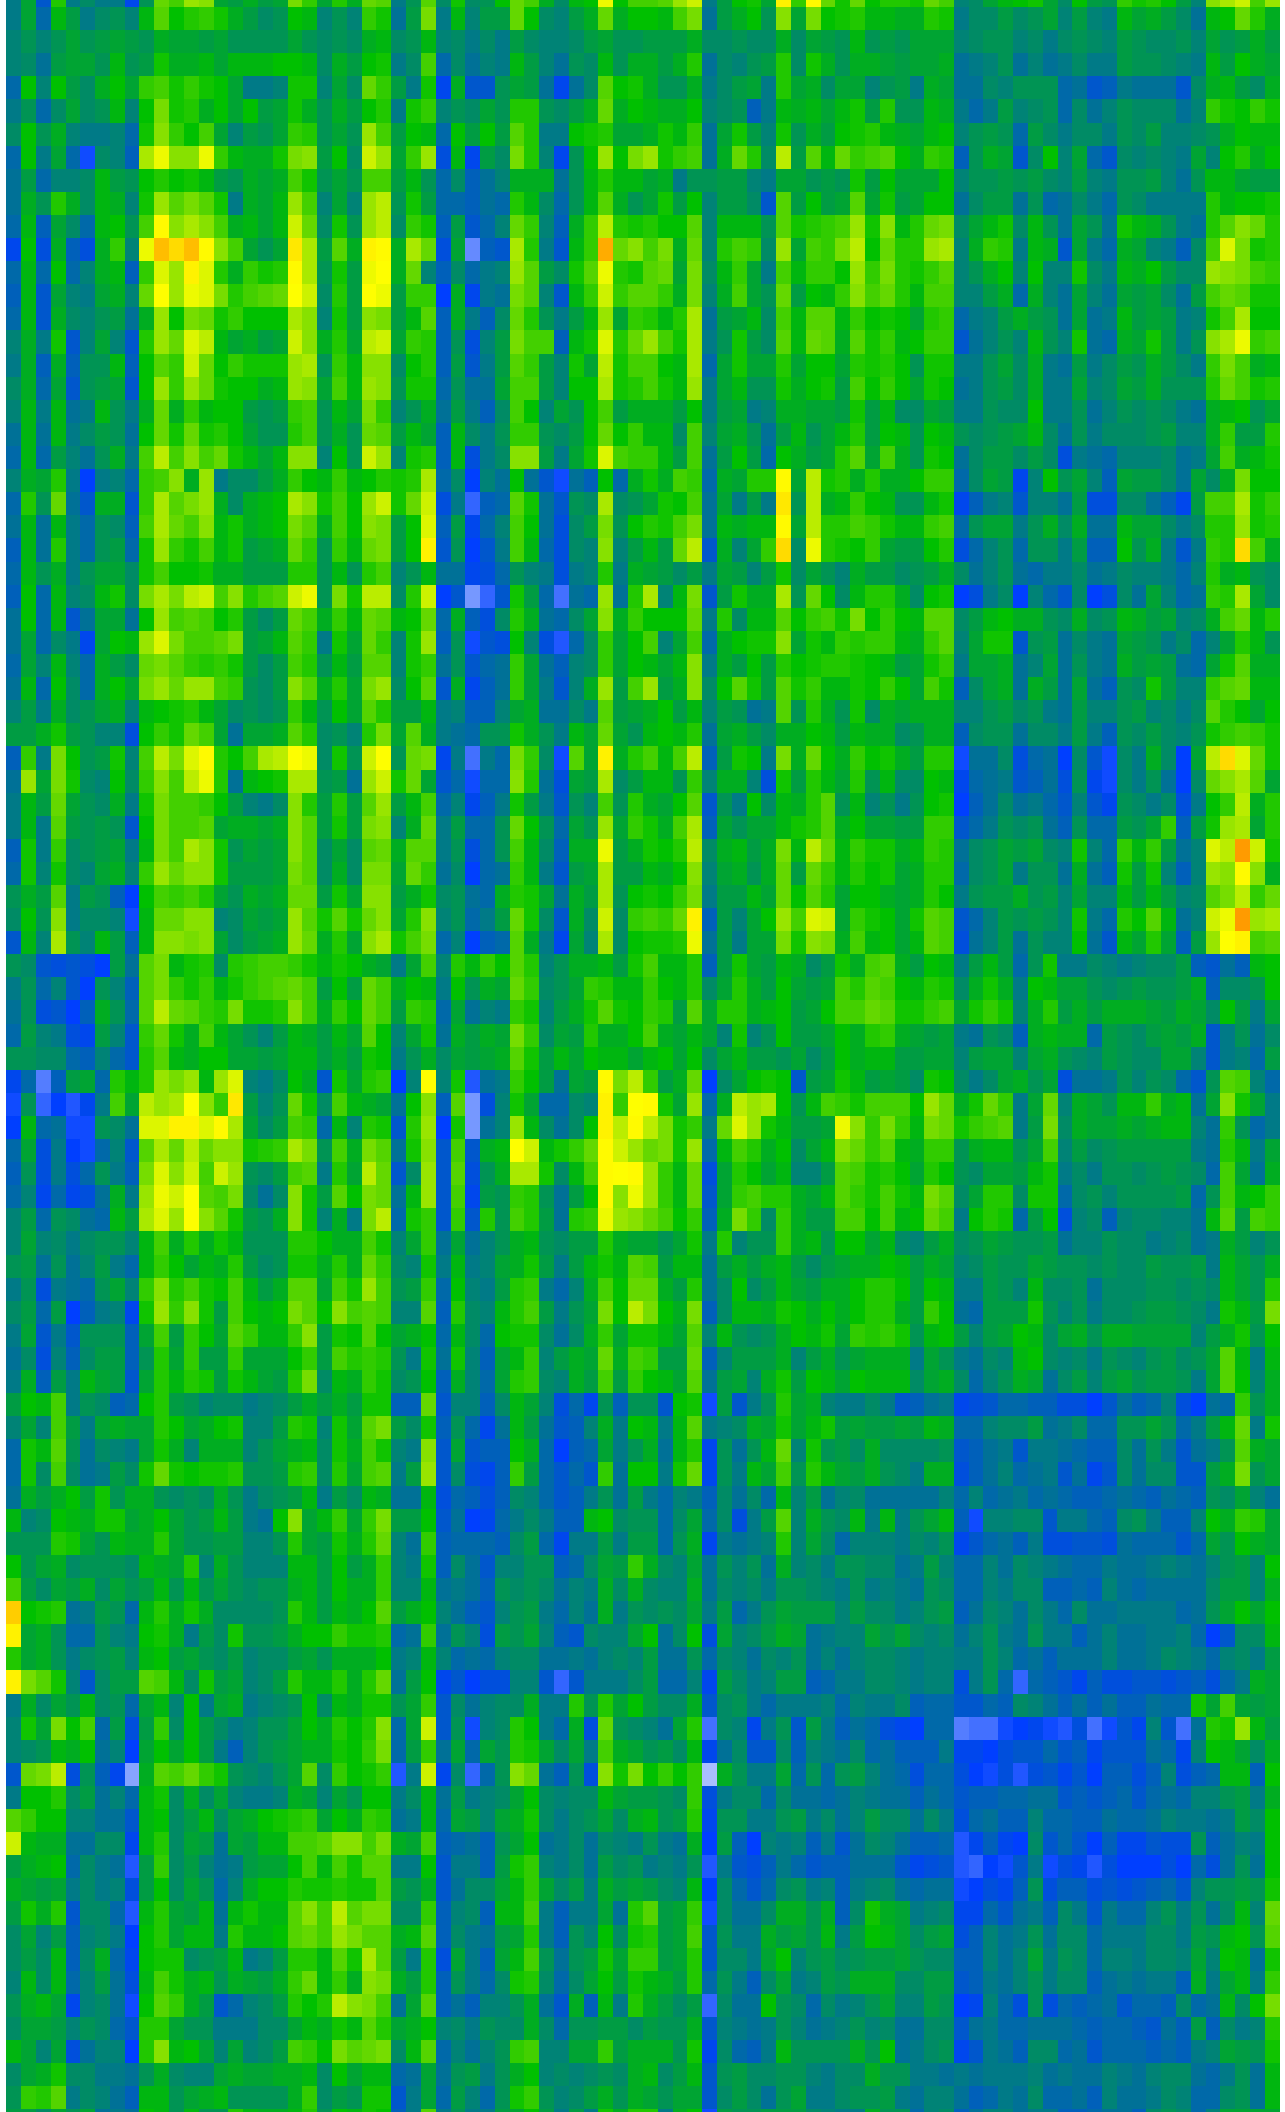

At2g05660  
At1g33130  
At2g26630  
At1g31630  
At2g15560  
At2g07703  
At4g31520  
At3g03260  
At2g10140  
At5g43000  
At1g50900  
At2g07697  
At2g07737  
At3g30585  
At1g67370  
At2g07737  
At2g07713  
At5g56480  
At5g06020  
At3g44800  
At3g49770  
At2g12250  
At5g30480  
At1g41820  
At1g02940  
At4g38870  
At1g47660  
At2g05980  
At1g23990  
At4g03380  
At4g29200  
At2g22440  
At3g08810  
At3g52310  
At2g16960  
At4g05370  
At5g11940  
At1g52470  
At5g60440  
At2g02700  
At1g44510  
At5g27340  
At3g32050  
At1g60530  
At5g60090  
At1g33000  
At5g53920  
At5g23140  
At1g67620  
At2g03380  
At5g49410  
At5g16860  
At4g14820  
At5g30380  
At1g65120  
At3g47100  
At5g28720  
At5g28190  
At1g36810  
At3g06895  
At3g60940  
At2g24930  
At3g29660  
At3g43880  
At1g59930  
At5g35510  
At1g30150  
At1g77340  
At1g17910  
At5g07310  
At1g67270  
At5g37840  
At2g20625  
At2g09960  
At2g26660  
At2g32830  
At1g74340  
At1g43660  
At1g77890  
At1g44090  
At3g46680  
At5g29020  
At5g49140  
At2g31480  
At2g07010  
At3g42290  
At4g23590  
At3g32060  
At1g62890  
At5g17130  
At2g34580

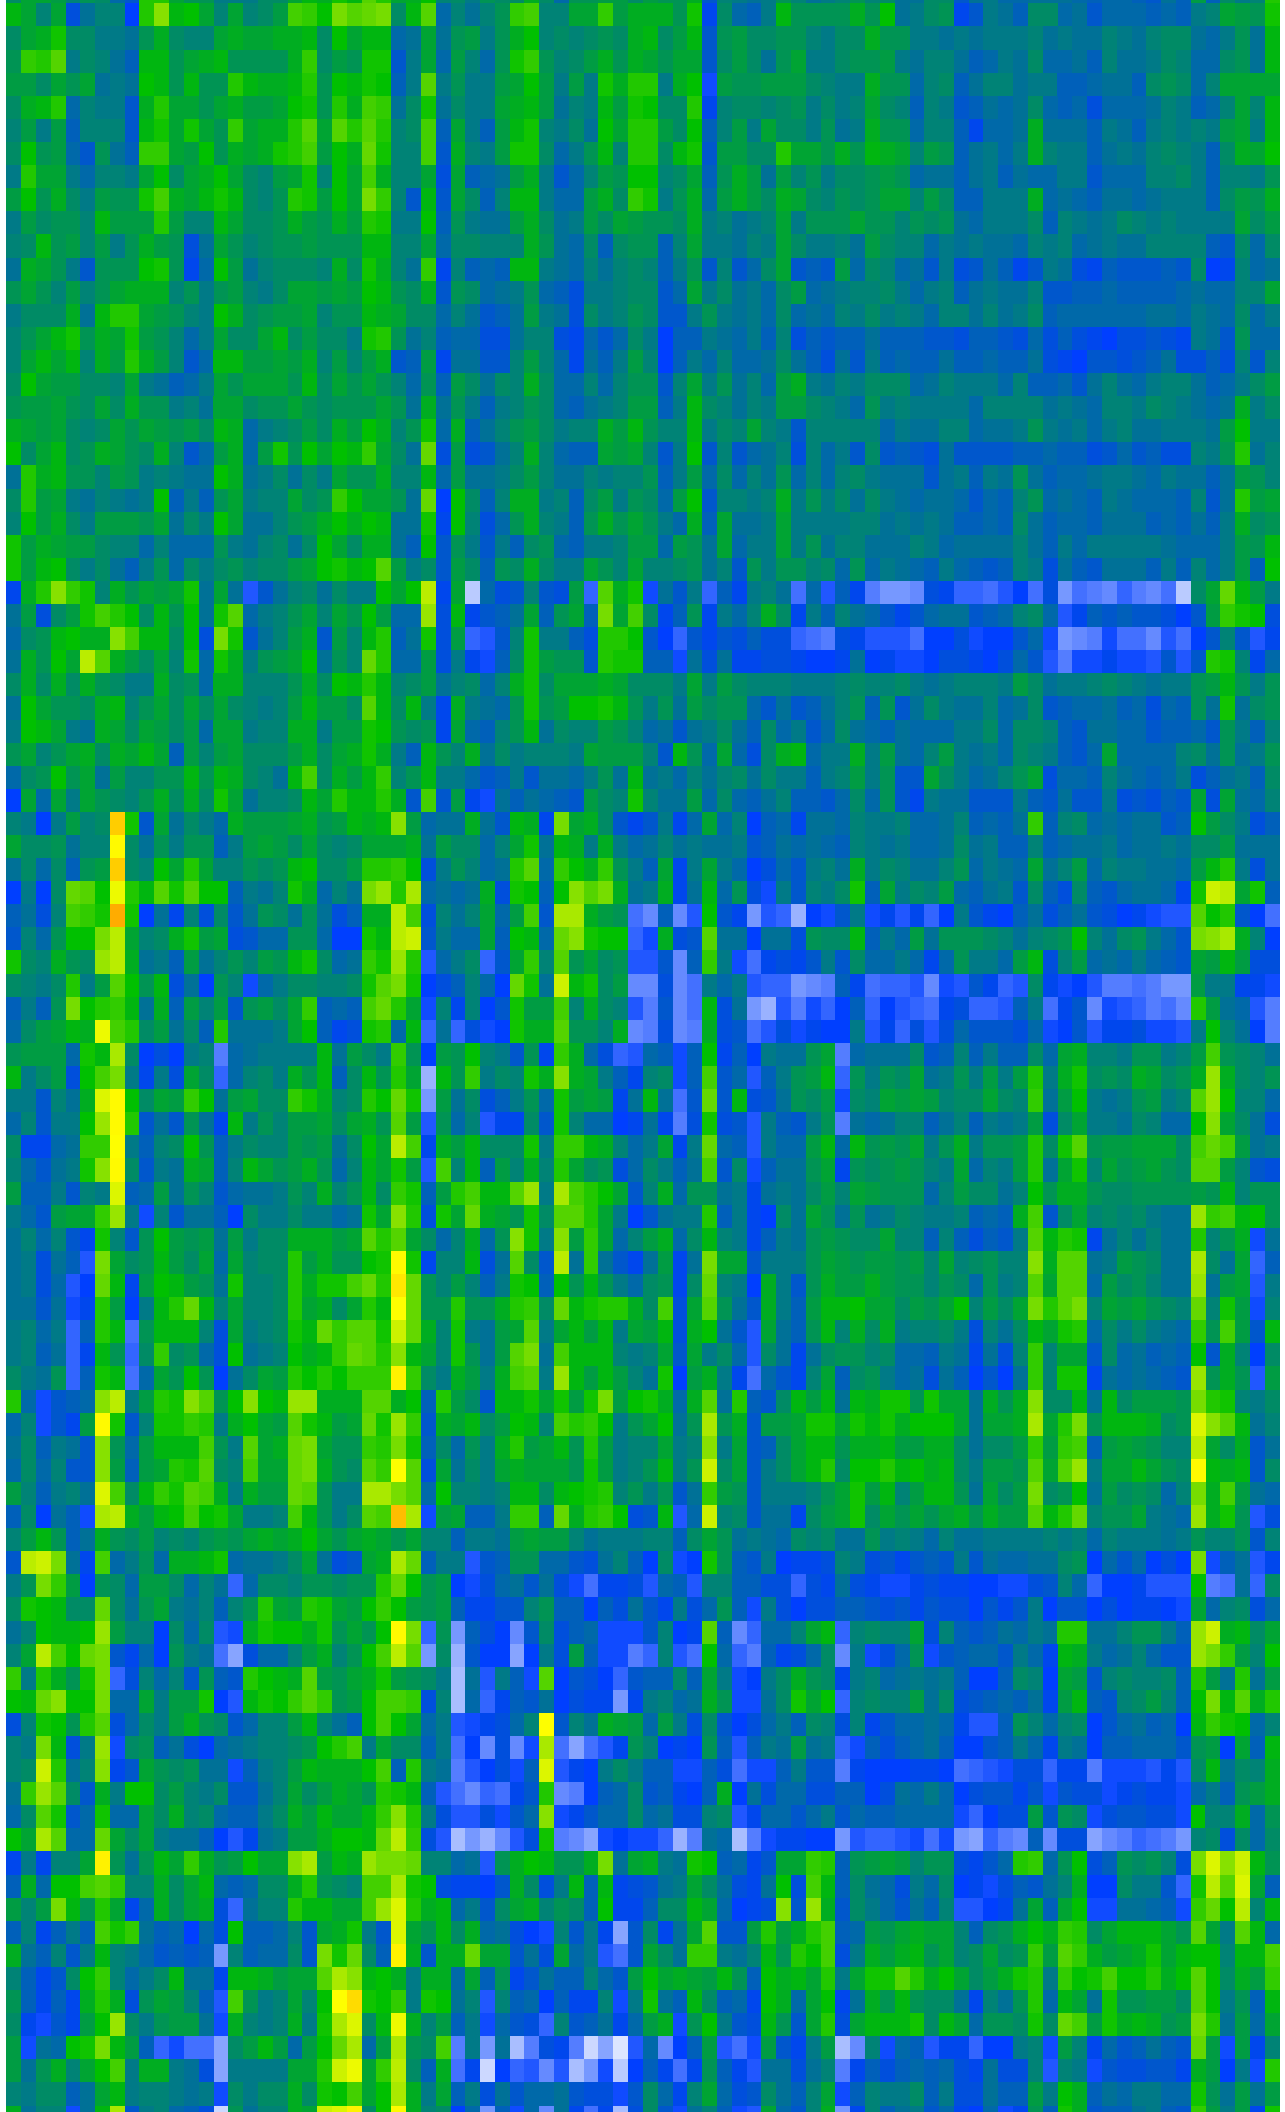

At1g62890  
At5g17130  
At2g34580  
At1g60320  
At4g08650  
At4g05080  
At1g61440  
At3g53060  
At1g71470  
At5g27160  
At3g20760  
At2g16020  
At2g04670  
At3g42540  
At5g04650  
At2g15110  
At3g44270  
At5g38035  
At3g29510  
At1g35183  
At4g03840  
At1g41930  
At5g27190  
At3g30840  
At1g36830  
At2g43130  
At5g25190  
At5g64490  
At5g65610  
At2g45380  
At4g04420  
At5g32490  
At3g59260  
At3g30750  
At1g17900  
At5g17300  
At5g14470  
At1g08630  
At3g06570  
At5g02840  
At4g02440  
At5g47390  
At5g05870  
At1g73680  
At2g17450  
At5g19130  
At3g15460  
At1g79700  
At5g22920  
At4g34030  
At3g13450  
At2g43400  
At2g42620  
At1g53690  
At4g19380  
At5g57240  
At3g21090  
At4g14130  
At2g38530  
At5g59590  
At4g24050  
At3g29370  
At1g47610  
At5g53190  
At3g47600  
At1g61900  
At3g61940  
At4g30340  
At4g25640  
At4g36110  
At5g67560  
At3g10260  
At1g04990  
At3g56440  
At5g11150  
At4g17100  
At2g01170  
At3g09540  
At1g53035  
At2g15970  
At2g39750  
At5g25240  
At1g48260  
At5g47780  
At1g53730  
At1g68740  
At4g23680  
At5g57785  
At5g34850  
At2g31570  
At5g26270  
At2g28255



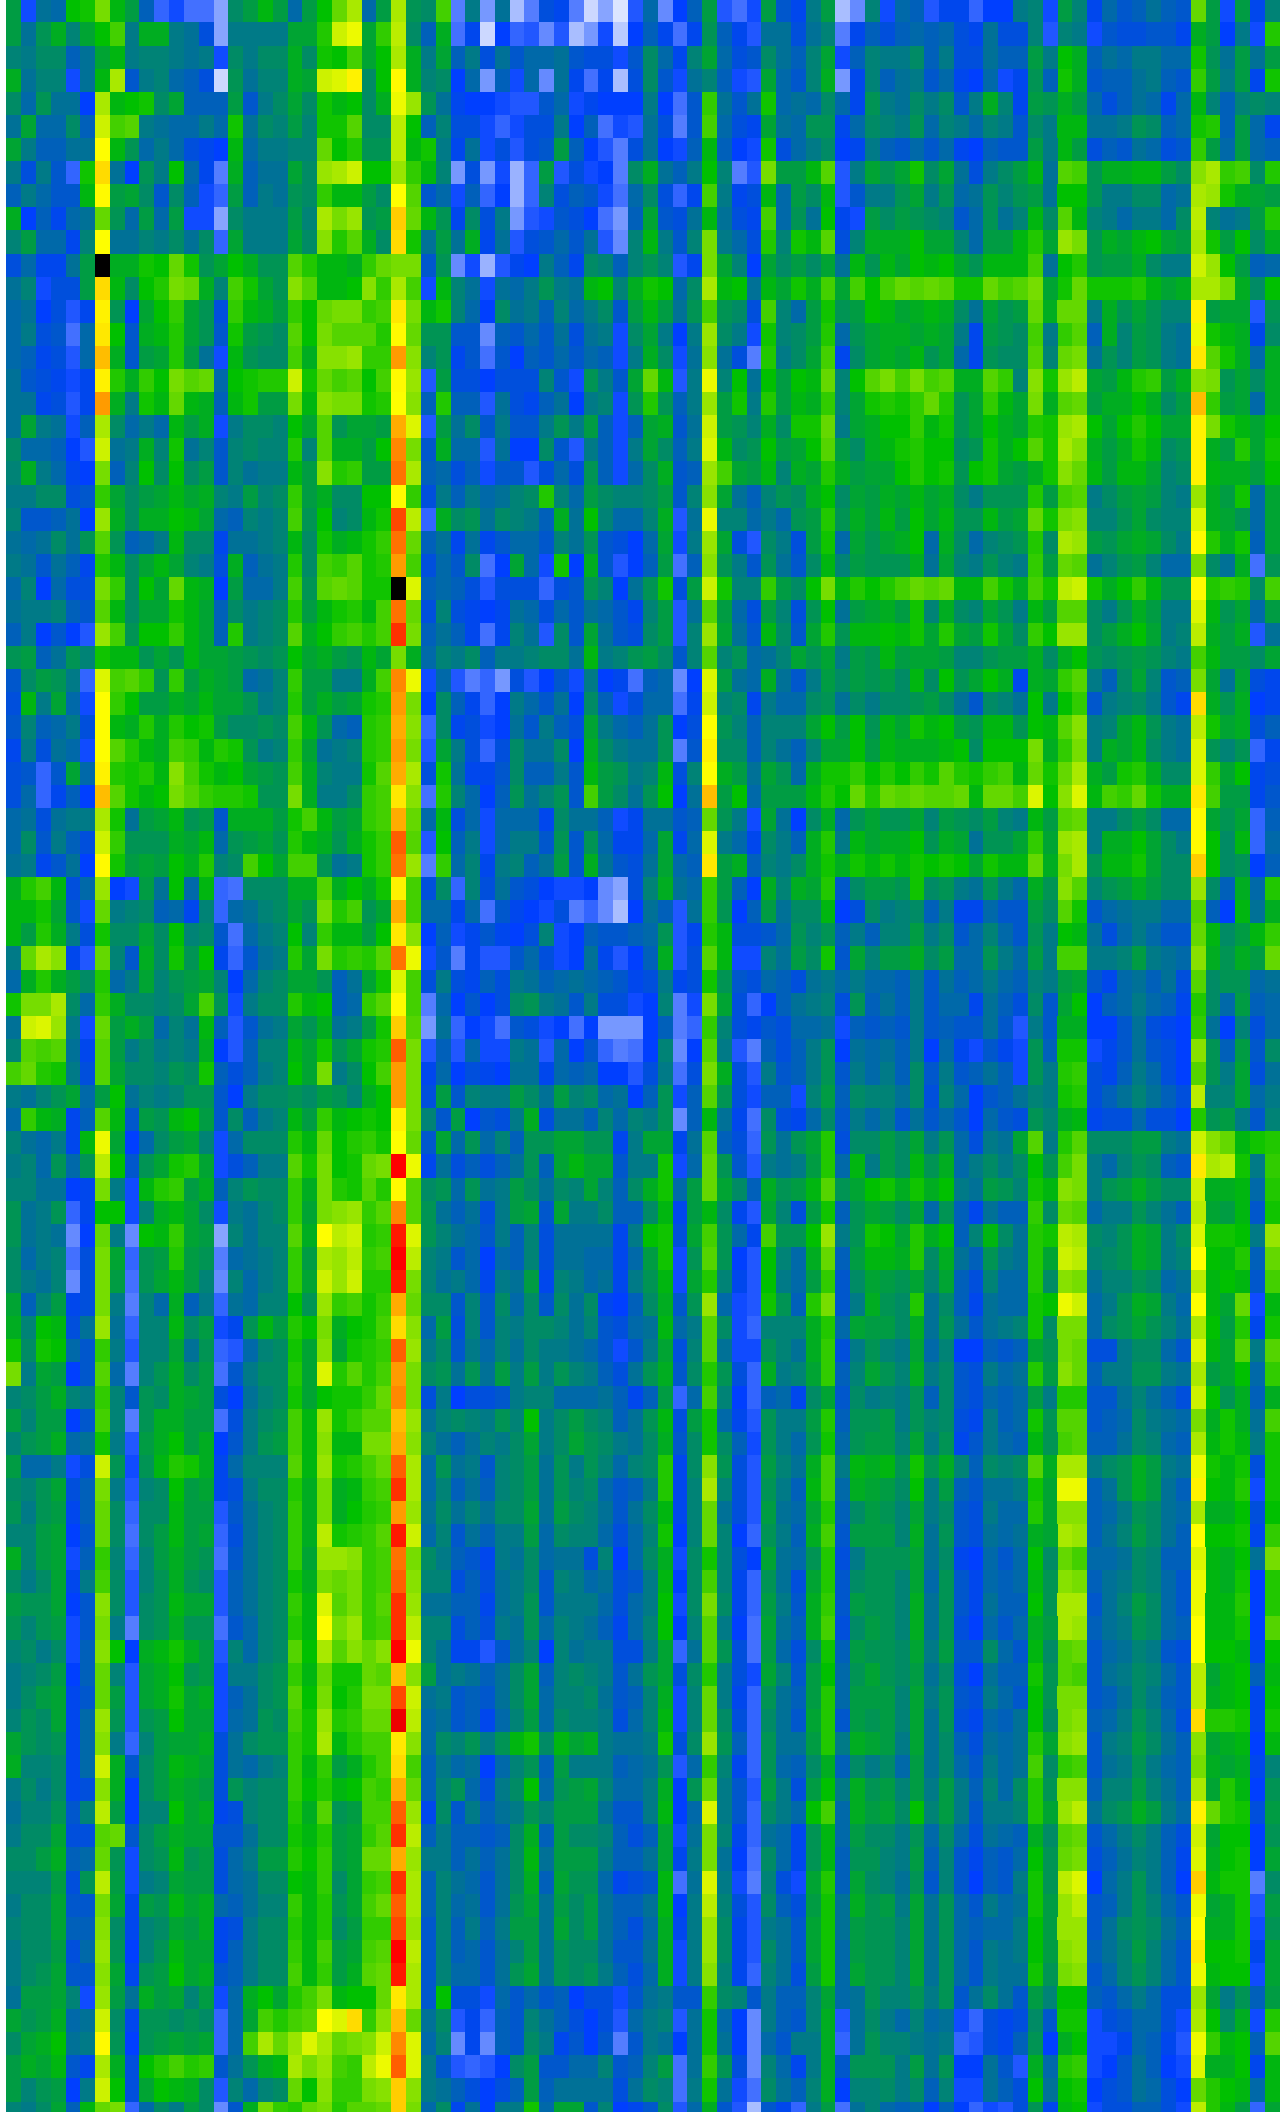

At5g34850  
At2g31570  
At5g26270  
At5g28050  
At4g26540  
At1g22330  
At3g58120  
At1g10200  
At5g12250  
At5g56040  
At2g35880  
At2g44740  
At3g48550  
At4g32460  
At3g12710  
At3g12610  
At5g04820  
At4g14750  
At5g23860  
At1g64390  
At2g35860  
At1g78440  
At4g30400  
At2g34490  
At2g27360  
At3g63120  
At3g48350  
At5g04530  
At4g36230  
At4g00400  
At4g24510  
At1g75900  
At1g17840  
At4g03070  
At1g78170  
At5g64570  
At4g25830  
At5g20270  
At1g72470  
At1g58440  
At2g44940  
At5g43880  
At4g17470  
At5g62470  
At5g43760  
At1g01120  
At4g01950  
At5g43840  
At4g25260  
At4g30410  
At2g33990  
At5g38970  
At3g54990  
At5g10430  
At1g22550  
At5g65390  
At4g11020  
At1g53700  
At2g02820  
At3g14370  
At1g18870  
At4g11610  
At3g59440  
At3g50660  
At5g04120  
At2g19660  
At5g47450  
At1g72140  
At2g16005  
At1g65310  
At5g60660  
At4g01680  
At4g35720  
At1g27670  
At4g14380  
At5g65800  
At3g28910  
At5g44440  
At4g23870  
At4g37220  
At3g53200  
At5g53980  
At3g48370  
At2g43050  
At3g48970  
At5g15290  
At1g76240  
At2g21880  
At2g41740  
At5g02170  
At3g42800  
At5g56870

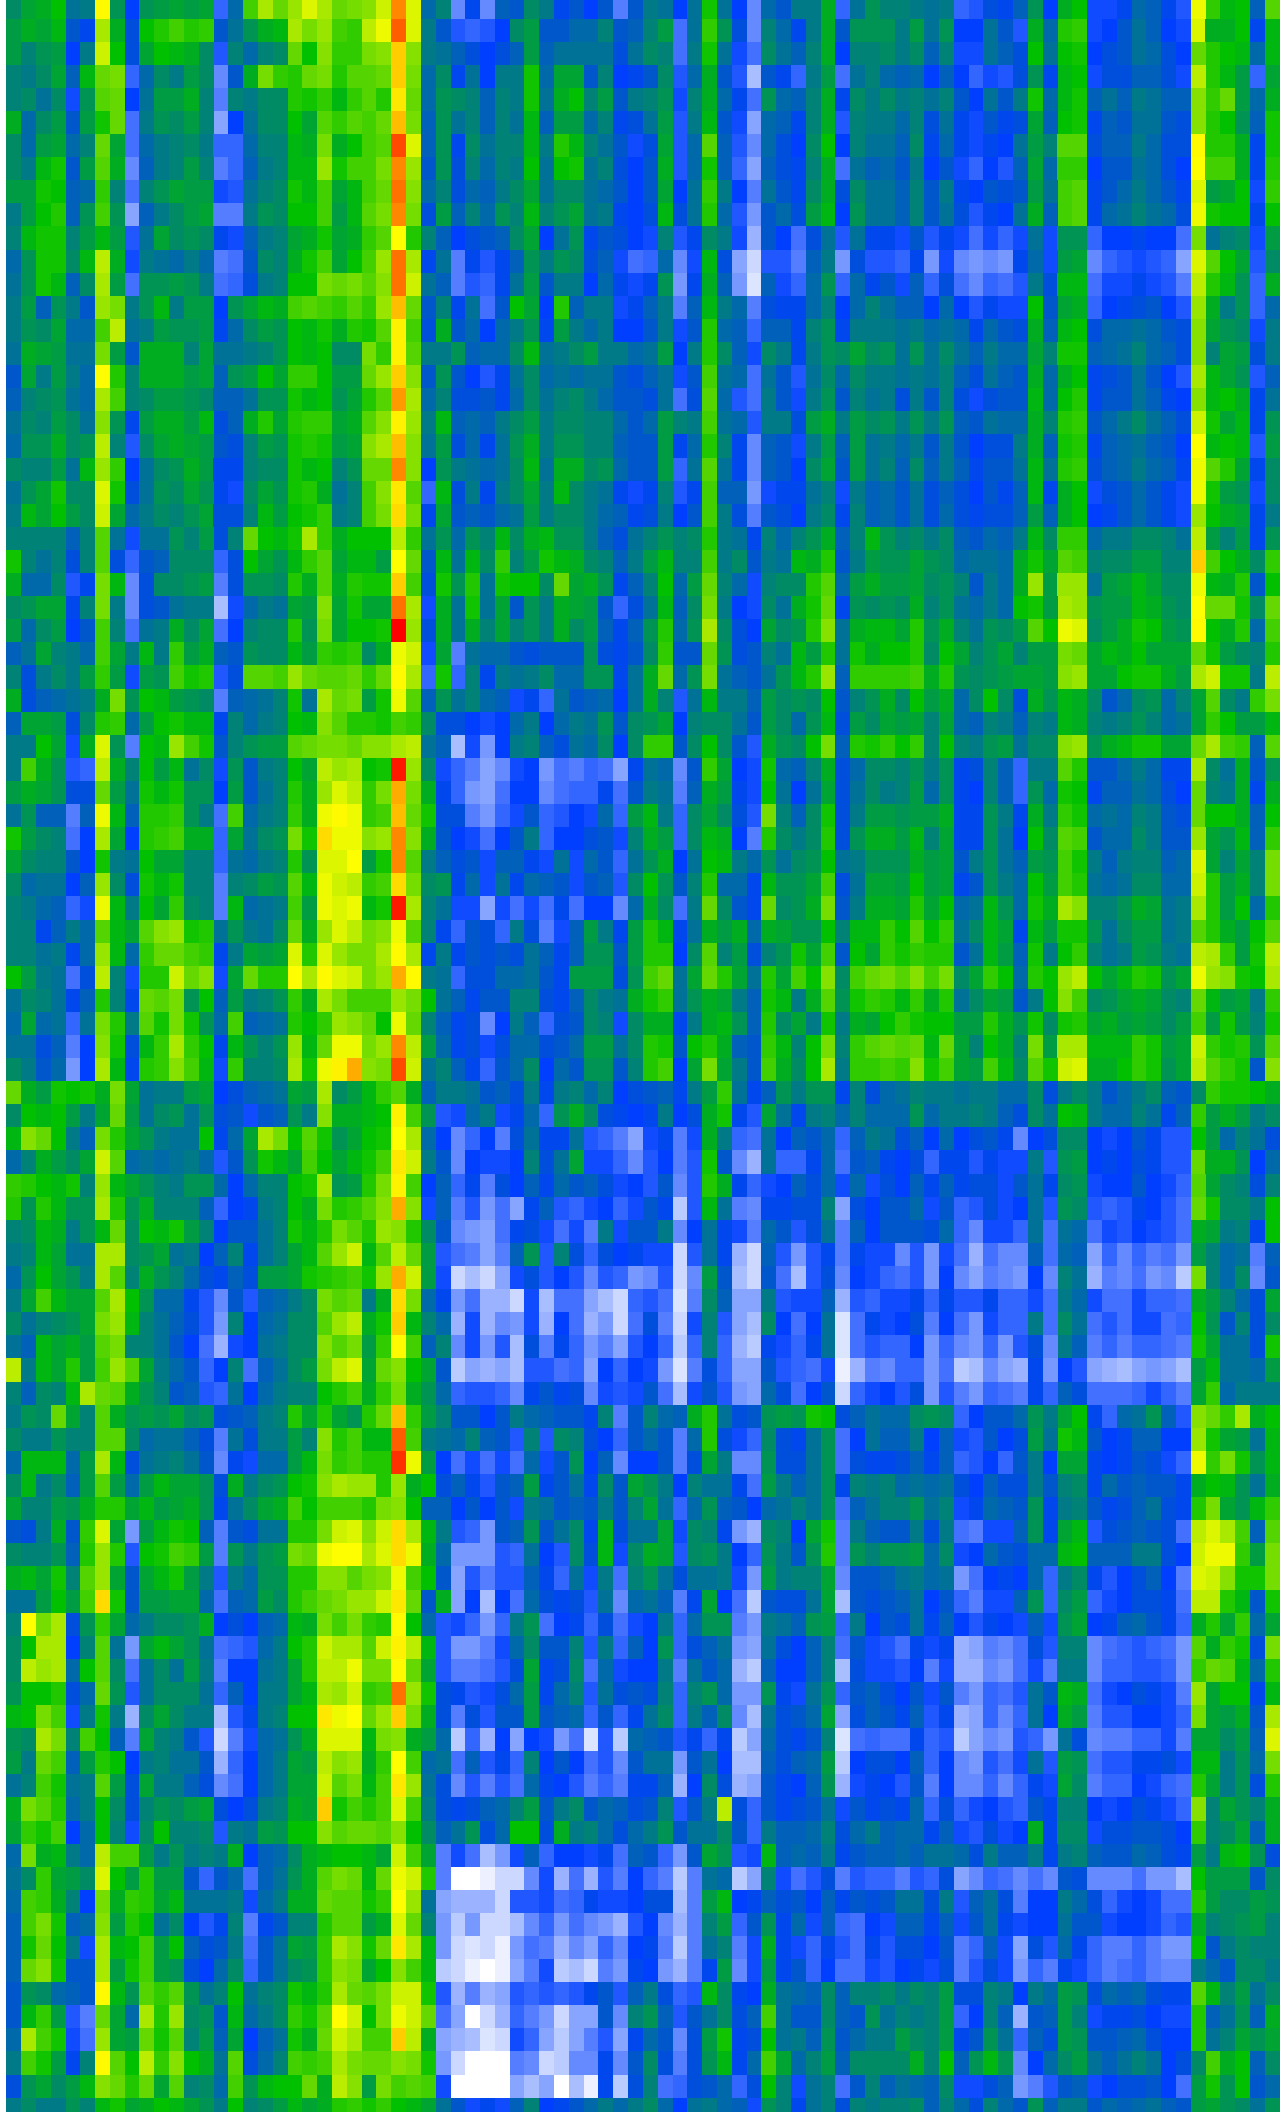

At2g41740  
At5g02170  
At3g42800  
At5g56870  
At4g34970  
At4g28040  
At3g52060  
At3g52480  
At2g34500  
At5g09440  
At2g34070  
At1g32410  
At3g13720  
At2g38480  
At5g52250  
At1g61150  
At4g16515  
At1g06980  
At5g67020  
At4g16670  
At1g02340  
At2g44140  
At1g52830  
At5g57670  
At5g60020  
At5g04770  
At4g10840  
At5g37790  
At2g29900  
At4g10360  
At4g14550  
At5g14070  
At1g68000  
At4g12730  
At2g38750  
At1g11545  
At2g39180  
At3g52370  
At5g11540  
At5g16590  
At3g14350  
At4g21310  
At1g06850  
At3g63360  
At3g57420  
At5g60120  
At1g78260  
At1g68670  
At1g12580  
At1g57680  
At1g76490  
At3g57070  
At5g36940  
At1g79410  
At1g34760  
At4g38250  
At3g18780  
At5g40890  
At3g61430  
At4g20840  
At4g33960  
At2g28260  
At3g05900  
At5g49720  
At1g10550  
At1g10800  
At5g20650  
At5g24170  
At3g54120  
At3g57790  
At5g56170  
At3g47670  
At2g30930  
At1g22530  
At4g40080  
At3g27890  
At1g13100  
At4g17340  
At5g04330  
At3g59900  
At2g25800  
At3g18060  
At4g39350  
At5g05170  
At4g32410  
At5g60920  
At3g08670  
At5g18520  
At5g64740  
At2g46330  
At2g16510  
At2g22200

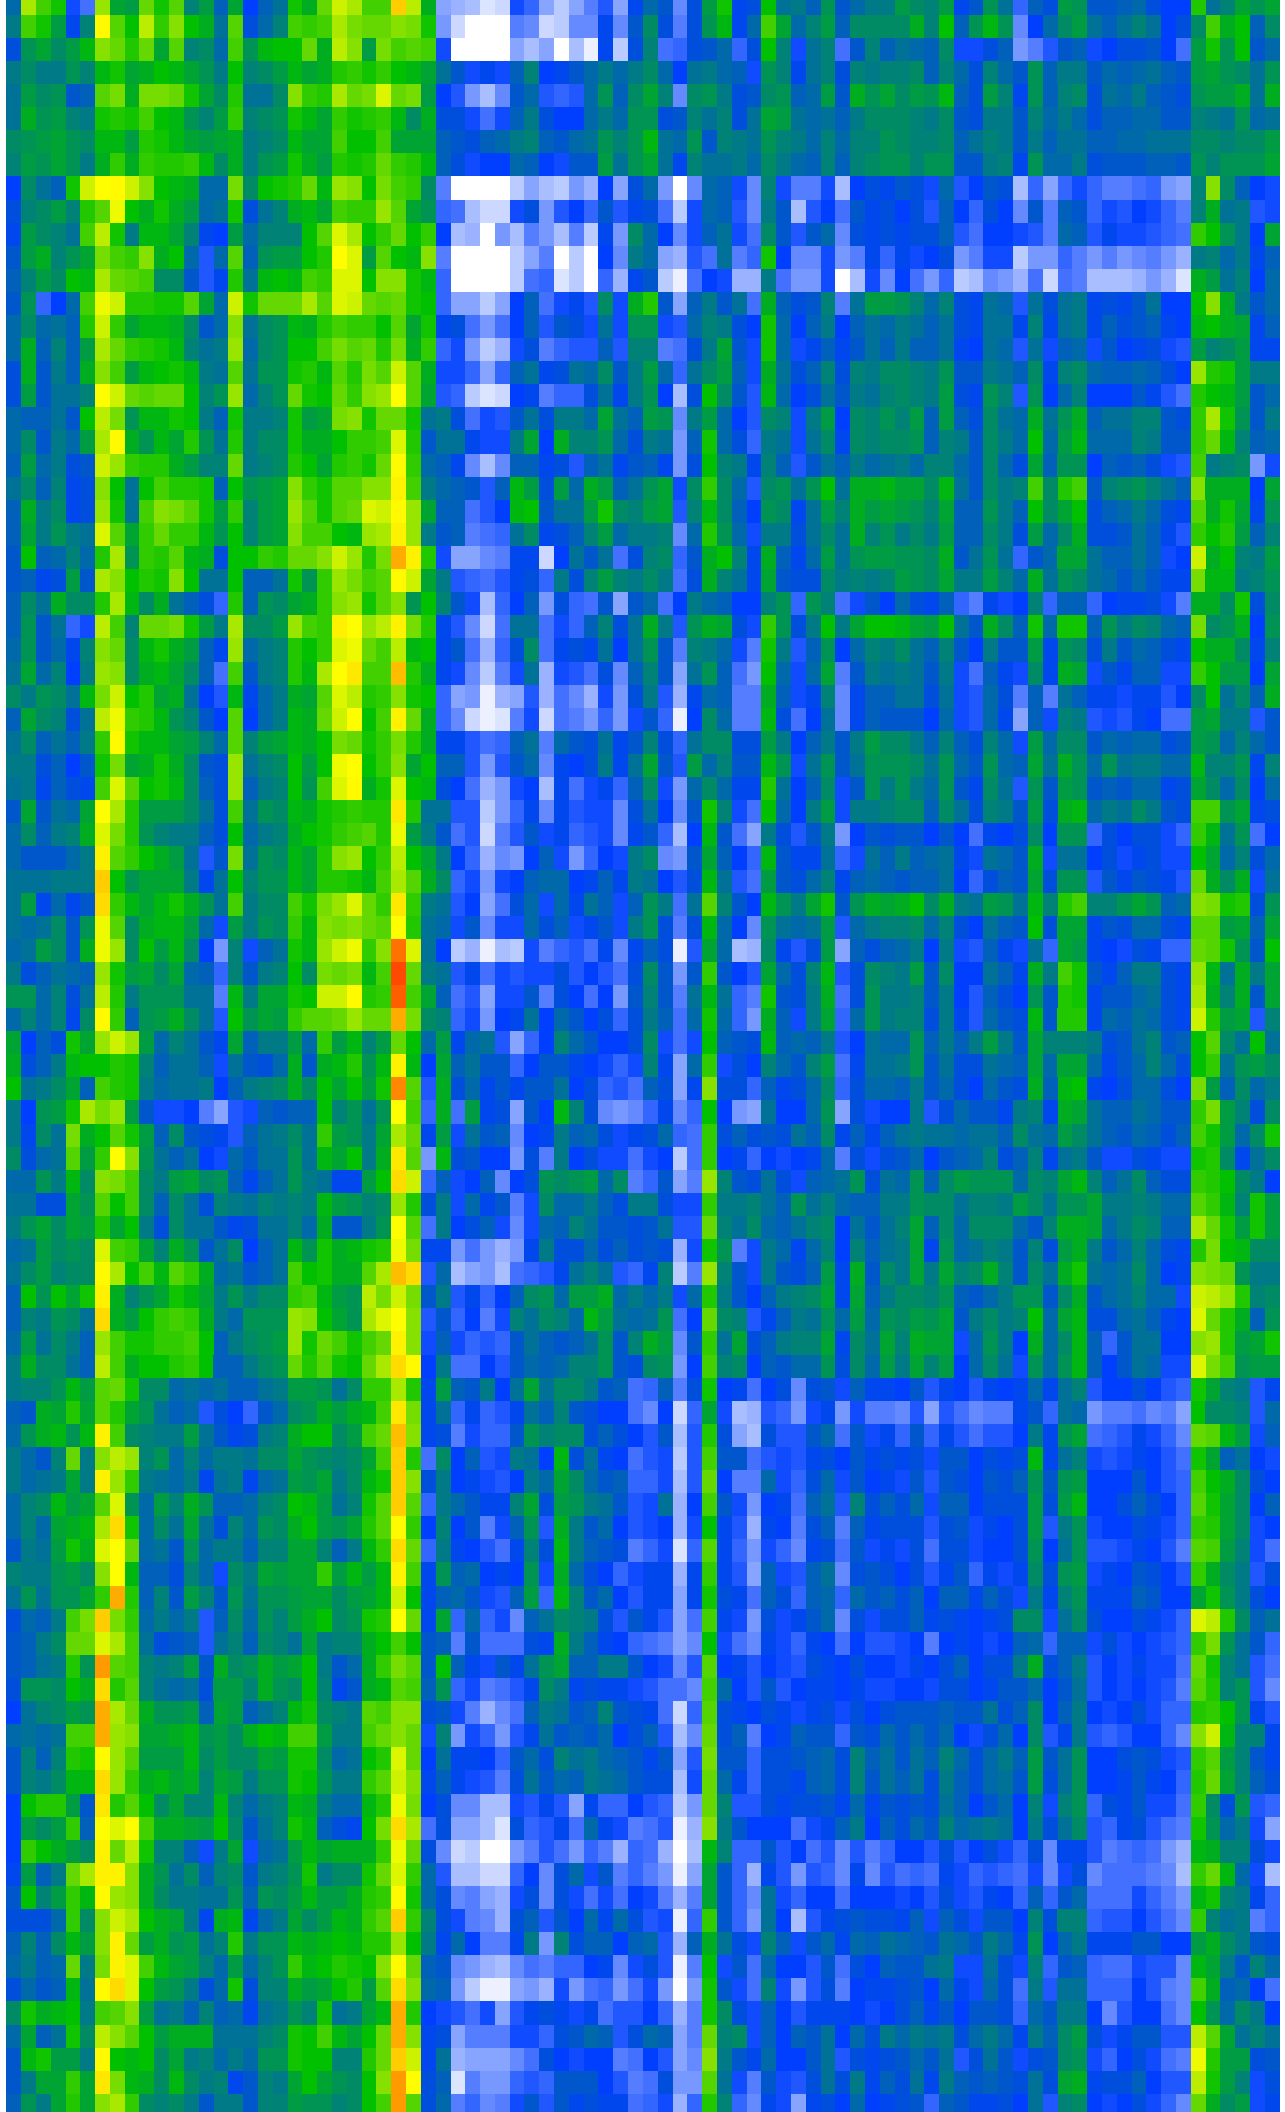

At5g64740  
At2g46330  
At2g16510  
At2g22200  
At5g38100  
At3g18120  
At5g53690  
At2g46050  
At4g26710  
At2g05380  
At4g11150  
At3g13410  
At3g24160  
At1g16170  
At4g34770  
At1g18400  
At5g14090  
At1g17700  
At3g53250  
At4g10910  
At5g24570  
At2g24800  
At5g66260  
At2g18010  
At3g60080  
At3g10760  
At1g62380  
At4g02700  
At1g67910  
At1g03870  
At5g67420  
At5g44020  
At2g37030  
At1g52100  
At1g16390  
At2g06850  
At5g23210  
At5g64330  
At1g20190  
At1g22335  
At5g22310  
At4g25570  
At2g21830  
At1g23030  
At1g25230  
At5g43700  
At4g23670  
At5g51890  
At5g10450  
At5g14880  
At2g45960  
At3g47620  
At2g04850  
At4g15920  
At1g17970  
At1g17120  
At5g23870  
At4g32000  
At3g62160  
At1g58070  
At5g13240  
At1g71090  
At1g22740  
At5g62100  
At4g35470  
At2g05540  
At5g49360  
At4g38690  
At4g12690  
At2g20670  
At3g01690  
At1g71970  
At2g40610  
At1g52190  
At3g02540  
At1g67050  
At2g21200  
At5g18060  
At4g33220  
At1g51500  
At1g05850  
At3g16570  
At5g03120  
At3g26300  
At5g04190  
At4g00150  
At1g01430  
At1g04240  
At2g41330  
At1g22910  
At5g55910  
At2g26690

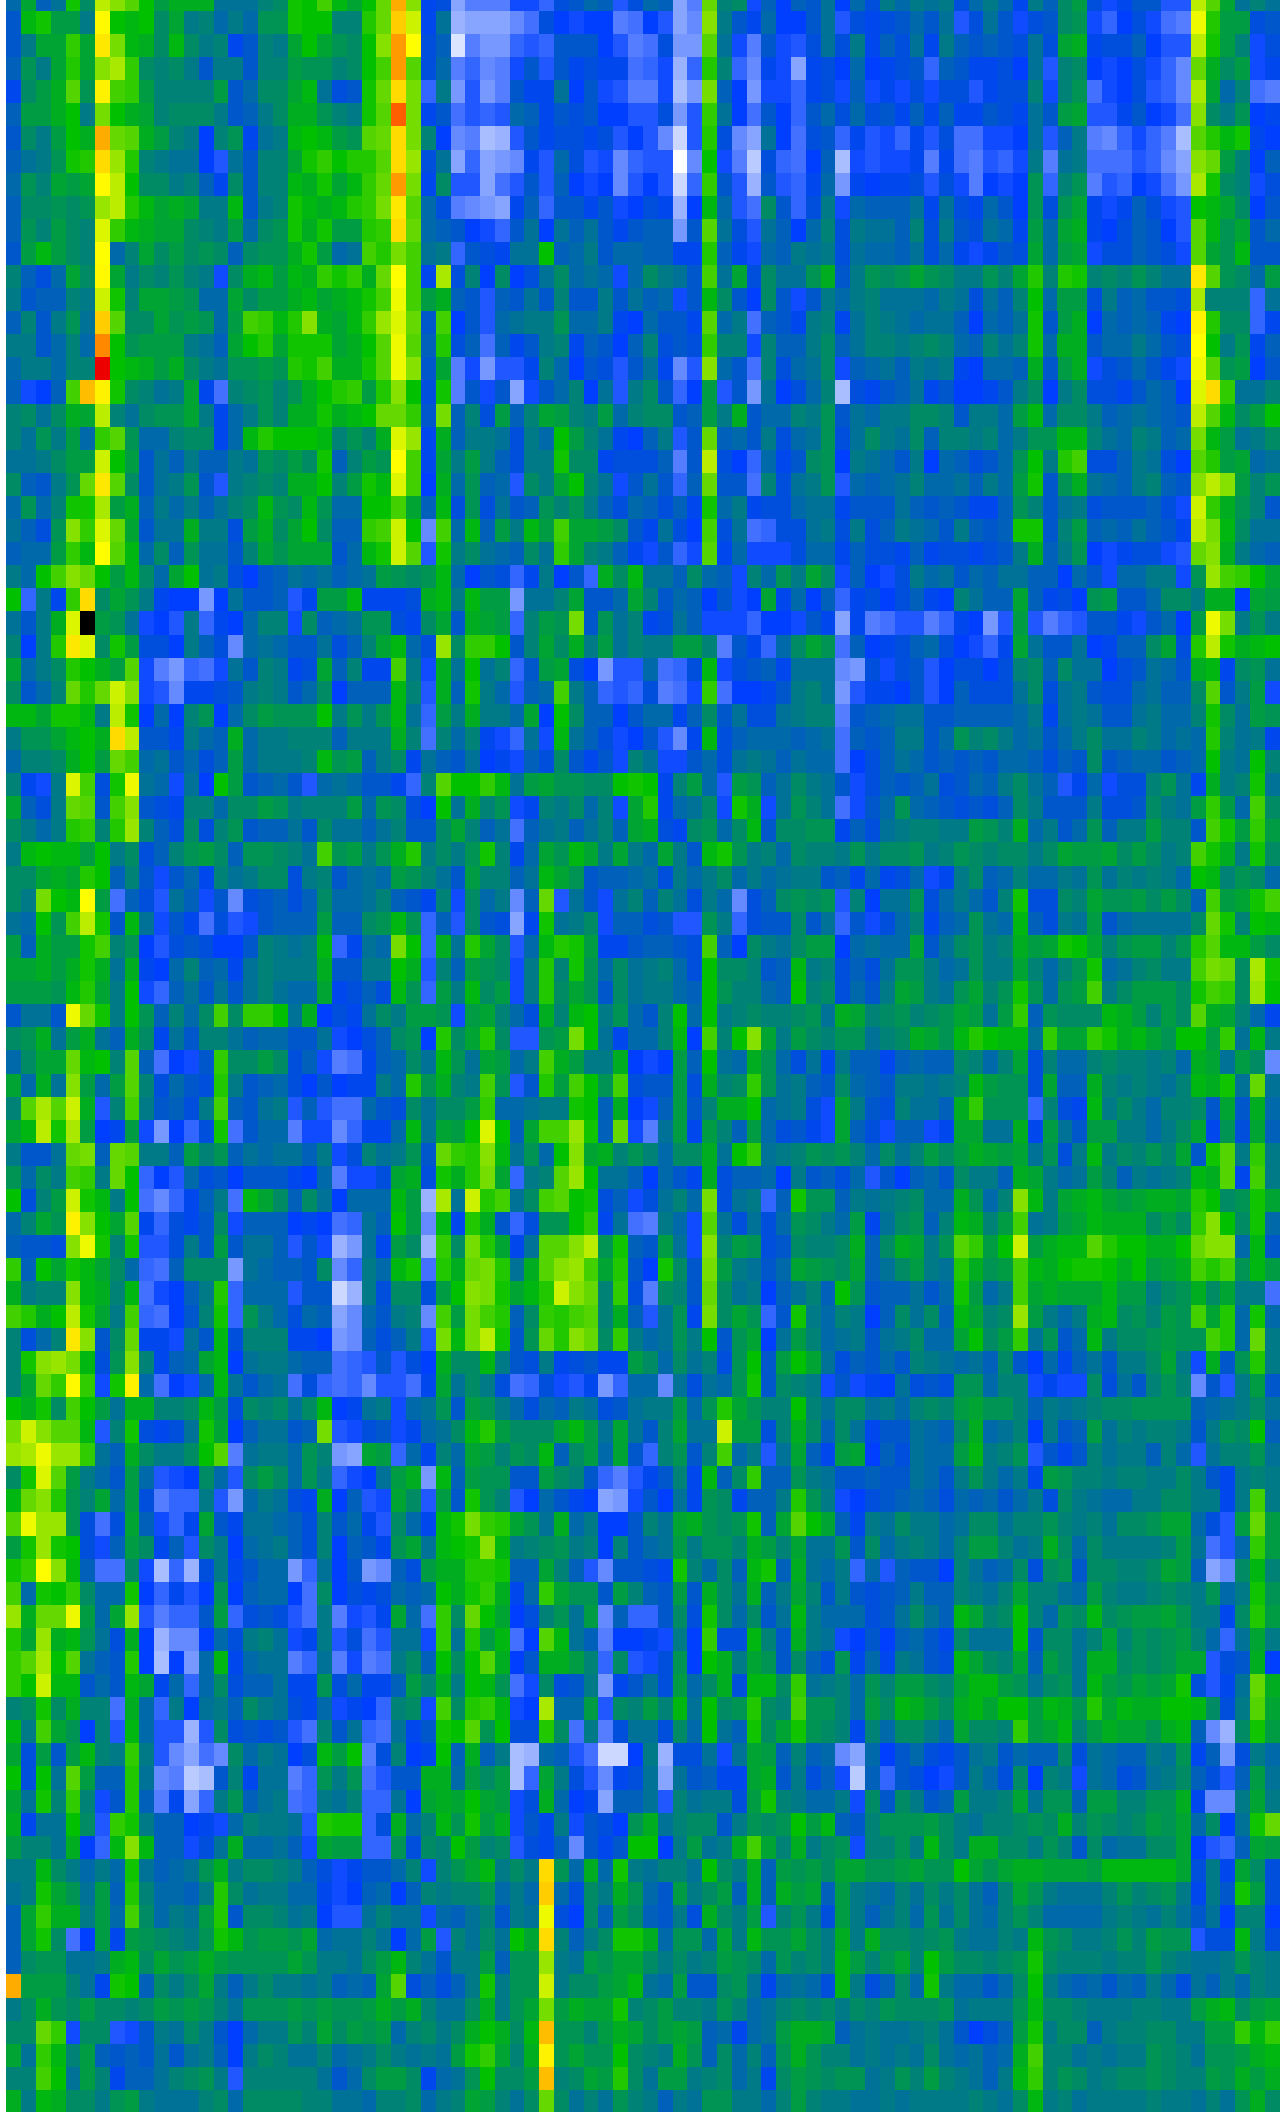

At2g11330  
At1g22910  
At5g55910  
At2g26690  
At1g68530  
At1g07720  
At3g16850  
At4g23400  
At3g23050  
At2g02950  
At3g03830  
At3g50120  
At5g45930  
At3g30180  
At2g42900  
At5g48900  
At3g07010  
At4g33630  
At1g54790  
At1g65590  
At3g03840  
At3g17100  
At1g78970  
At1g03520  
At1g29500  
At3g29350  
At1g01800  
At5g03455  
At2g17350  
At1g05310  
At4g01330  
At4g37610  
At5g28770  
At3g62930  
At5g53850  
At2g24180  
At1g13440  
At3g50340  
At4g04410  
At2g30860  
At4g21960  
At1g35612  
At3g01670  
At3g01680  
At1g79110  
At3g43740  
At5g63870  
At4g00340  
At5g45060  
At5g62000  
At3g60910  
At1g06390  
At3g43220  
At5g09670  
At1g16460  
At4g39560  
At3g02130  
At2g47070  
At1g80800  
At1g31340  
At4g39540  
At5g60800  
At4g02210  
At3g17700  
At3g53710  
At1g53840  
At3g23590  
At5g55040  
At5g35570  
At5g46560  
At1g67890  
At2g14250  
At2g47070  
At5g04560  
At1g06470  
At1g28340  
At2g33220  
At4g14570  
At4g00640  
At1g64780  
At5g12470  
At1g20030  
At1g51610  
At3g55760  
At2g31360  
At3g55580  
At4g30830  
At1g49220  
At1g19370  
At1g49720  
At1g64890  
At4g25480

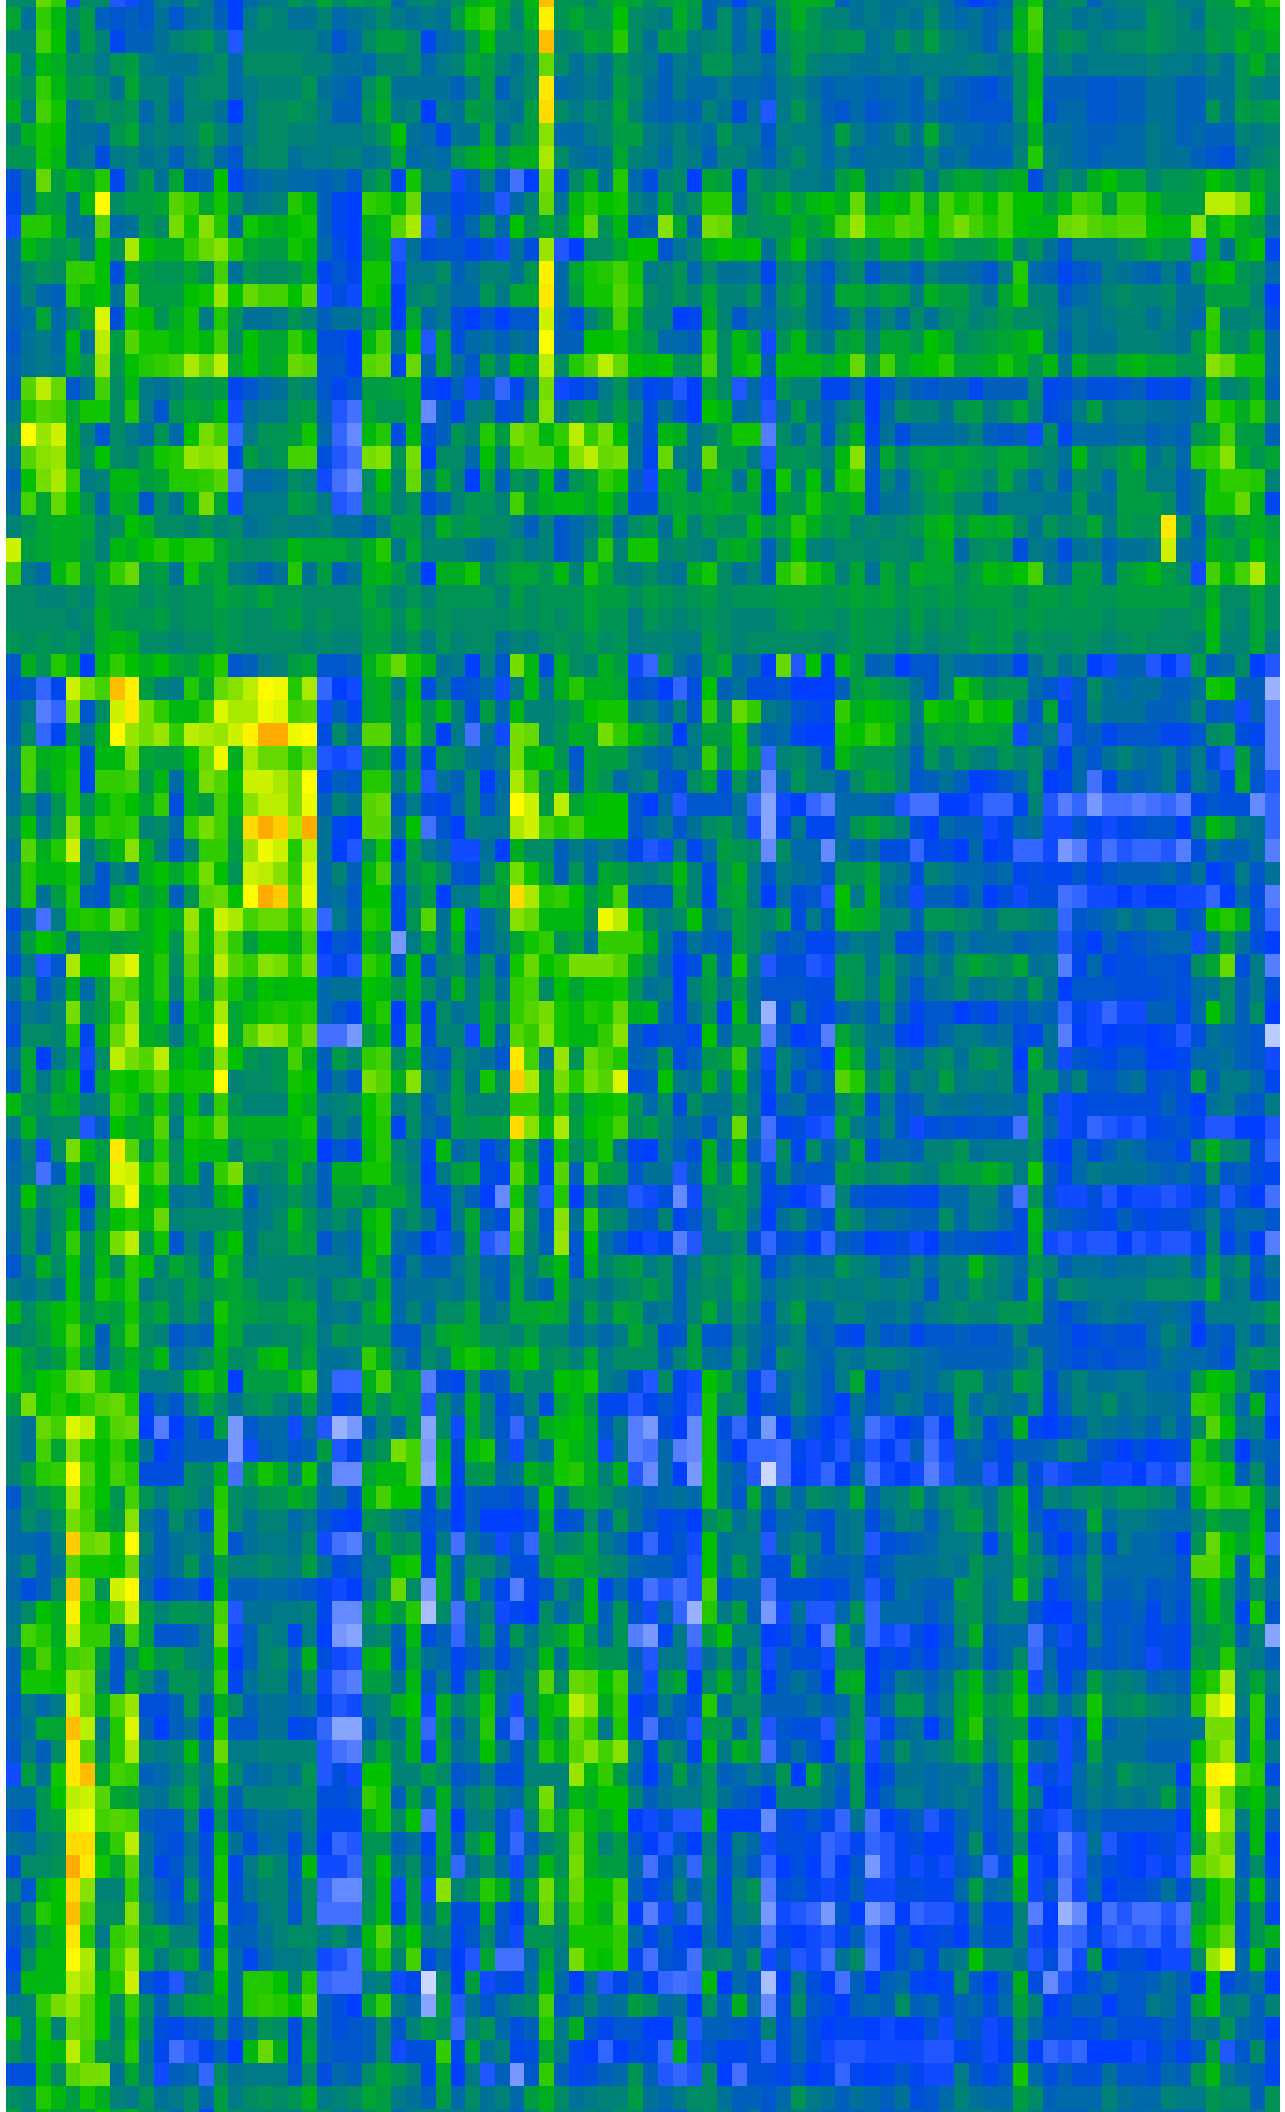

At1g49720  
At1g64890  
At4g25480  
At5g48250  
At5g24470  
At1g09350  
At1g68500  
At4g26130  
At3g50700  
At4g11090  
At2g34090  
At4g09020  
At2g36390  
At4g30660  
At4g18270  
At1g12730  
At5g62350  
At5g06710  
At1g49950  
At3g18930  
At2g39840  
At2g27260  
At3g07800  
At4g25330  
At4g38900  
At1g48580  
At1g79760  
At4g37780  
At4g15630  
At5g18140  
At2g20830  
At1g75770  
At1g19650  
At2g22740  
At5g64780  
At5g36250  
At3g27540  
At4g17650  
At3g47080  
At1g49880  
At3g47800  
At4g30310  
At3g50730  
At2g38460  
At1g34780  
At3g30460  
At5g21040  
At5g63340  
At5g15240  
At4g16690  
At4g33660  
At4g04840  
At1g48910  
At1g08810  
At2g10660  
At1g34240  
At1g18510  
At1g29610  
At5g46440  
At1g53170  
At1g21830  
At5g24520  
At4g10170  
At3g06330  
At4g00520  
At1g62560  
At4g02630  
At1g09440  
At3g13040  
At3g13480  
At4g34480  
At3g25020  
At3g05650  
At5g01240  
At2g22540  
At4g35290  
At1g60870  
At1g02300  
At1g66890  
At1g09415  
At1g78020  
At5g61580  
At5g50160  
At4g35270  
At2g22540  
At5g02370  
At5g25360  
At3g07650  
At1g74300  
At5g08590  
At4g17505

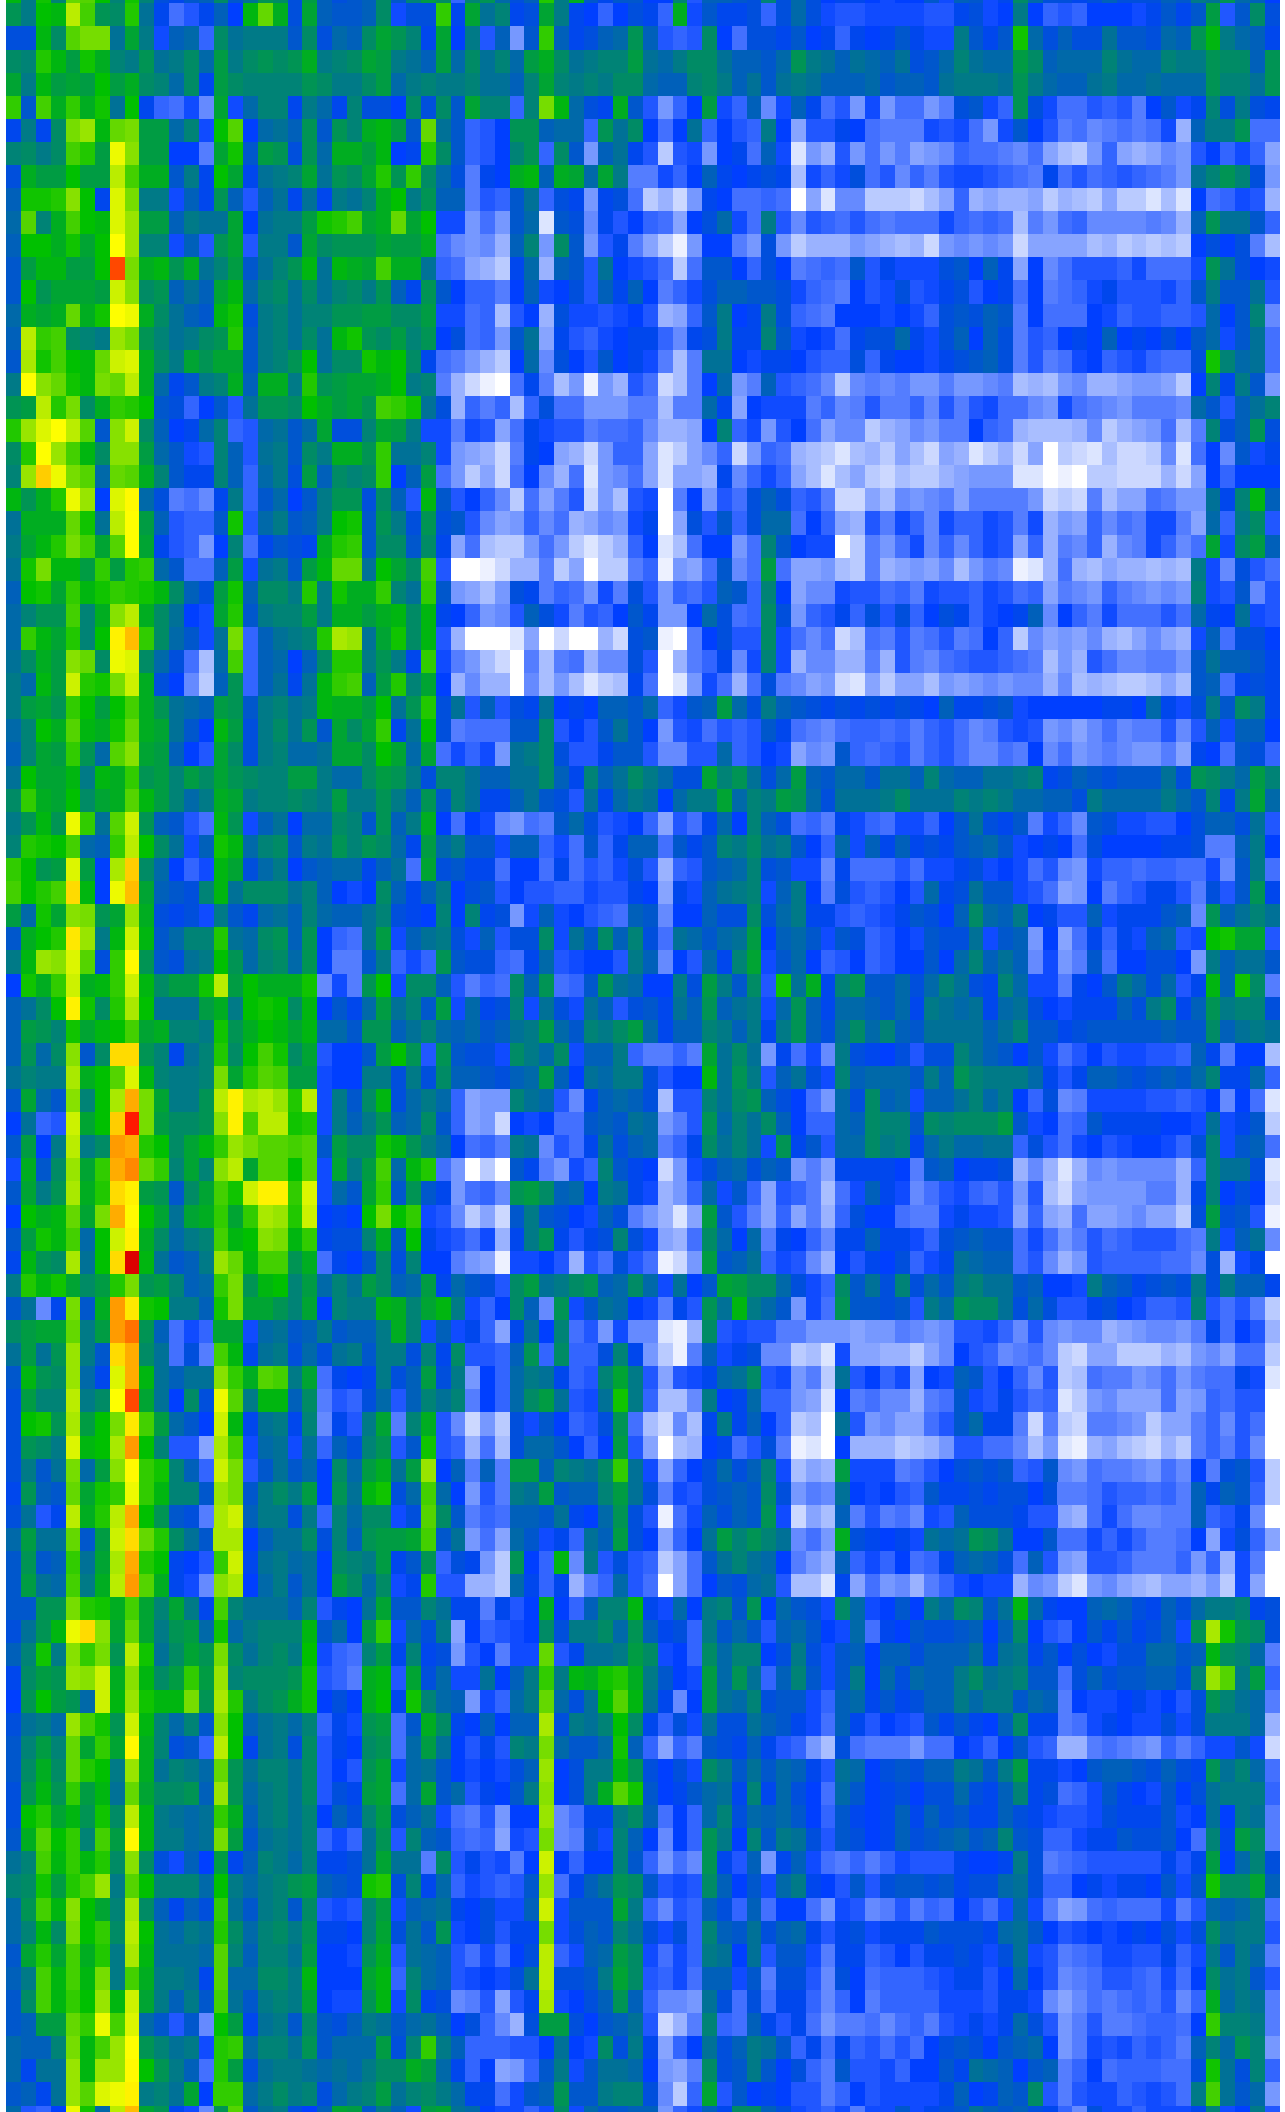

At1g74300  
At5g08590  
At4g17505  
At1g07190  
At3g46370  
At5g07370  
At2g29340  
At1g51360  
At3g48690  
At1g72430  
At5g14130  
At4g17245  
At4g15680  
At5g52900  
At4g21870  
At3g06070  
At3g07470  
At1g73670  
At3g51920  
At5g59540  
At1g05010  
At1g37130  
At4g25100  
At4g14880  
At3g58730  
At1g23090  
At1g01390  
At1g70410  
At3g61440  
At1g70230  
At5g01220  
At5g53450  
At1g01420  
At1g26290  
At1g63960  
At1g35560  
At1g50180  
At1g62180  
At2g23420  
At5g17880  
At2g24390  
At5g37850  
At5g16990  
At4g34630  
At1g47370  
At4g37760  
At5g28030  
At5g59610  
At4g09620  
At3g16175  
At2g20860  
At1g78140  
At5g59030  
At5g45820  
At1g32220  
At3g13800  
At4g25700  
At1g80380  
At4g35090  
At5g01410  
At1g43670  
At1g09130  
At1g67280  
At5g06580  
At1g04620  
At5g06130  
At1g08490  
At4g21860  
At4g25130  
At4g04210  
At4g01897  
At5g55990  
At5g03050  
At3g53800  
At5g26570  
At4g18240  
At3g52180  
At2g40840  
At2g28900  
At1g69830  
At1g13930  
At4g33490  
At1g10760  
At1g07050  
At3g46970  
At2g39920  
At4g04330  
At2g18300  
At1g69530  
At4g38860  
At1g74670  
At2g12220

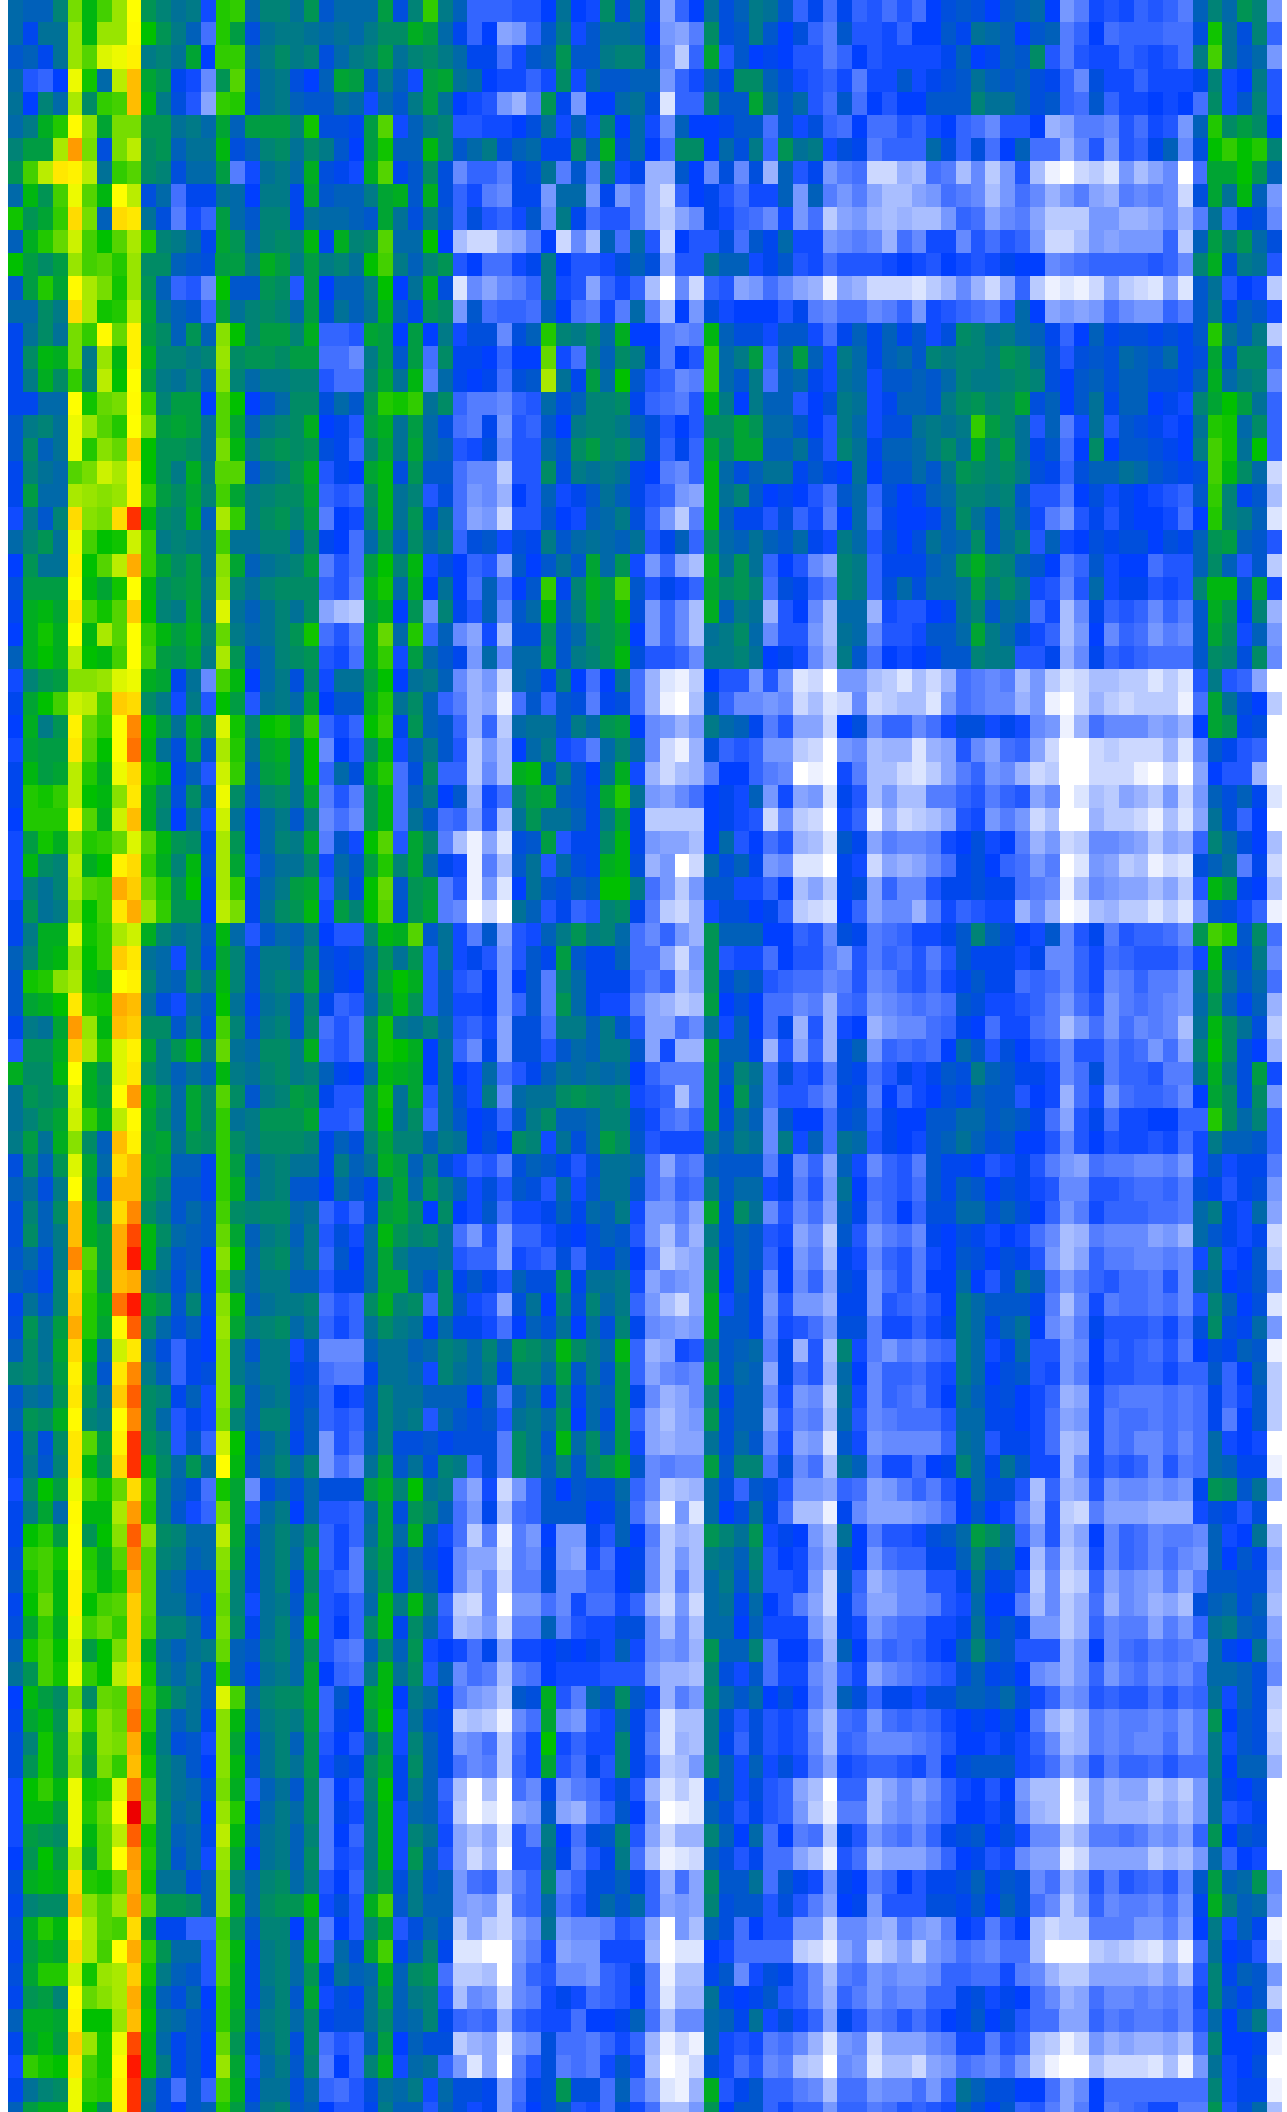

At1g69530  
At4g38860  
At1g74670  
At3g19000  
At3g15570  
At5g53030  
At1g70250  
At1g71040  
At2g01850  
At2g46735  
At3g52880  
At2g46640  
At4g38460  
At5g54250  
At4g30690  
At2g21380  
At4g04340  
At5g33280  
At1g68585  
At3g26490  
At1g08980  
At3g62820  
At2g01620  
At5g59670  
At4g36870  
At1g28610  
At4g13140  
At2g23760  
At4g13150  
At5g16660  
At2g46220  
At1g69935  
At2g45740  
At5g49940  
At3g01920  
At1g21065  
At1g28140  
At2g34310  
At4g31560  
At5g52190  
At2g17540  
At1g23390  
At1g66230  
At3g06080  
At1g52550  
At1g22140  
At5g62430  
At2g21080  
At2g46070  
At4g31870  
At3g24190  
At1g78510  
At3g21670  
At4g31390  
At1g32520  
At1g53090  
At3g56140  
At1g62250  
At5g20380  
At1g76570  
At5g64840  
At5g67030  
At5g51010  
At3g57190  
At1g30910  
At1g24040  
At2g20570  
At2g25510  
At2g41090  
At2g44210  
At1g66970  
At1g66100  
At1g16260  
At5g04360  
At2g31040  
At1g08550  
At3g62750  
At5g23440  
At2g04700  
At4g37000  
At1g19740  
At5g52030  
At3g28080  
At5g02790  
At1g02475  
At3g48720  
At1g68520  
At5g35490  
At3g62410  
At5g03880  
At1g64720  
At1g22600

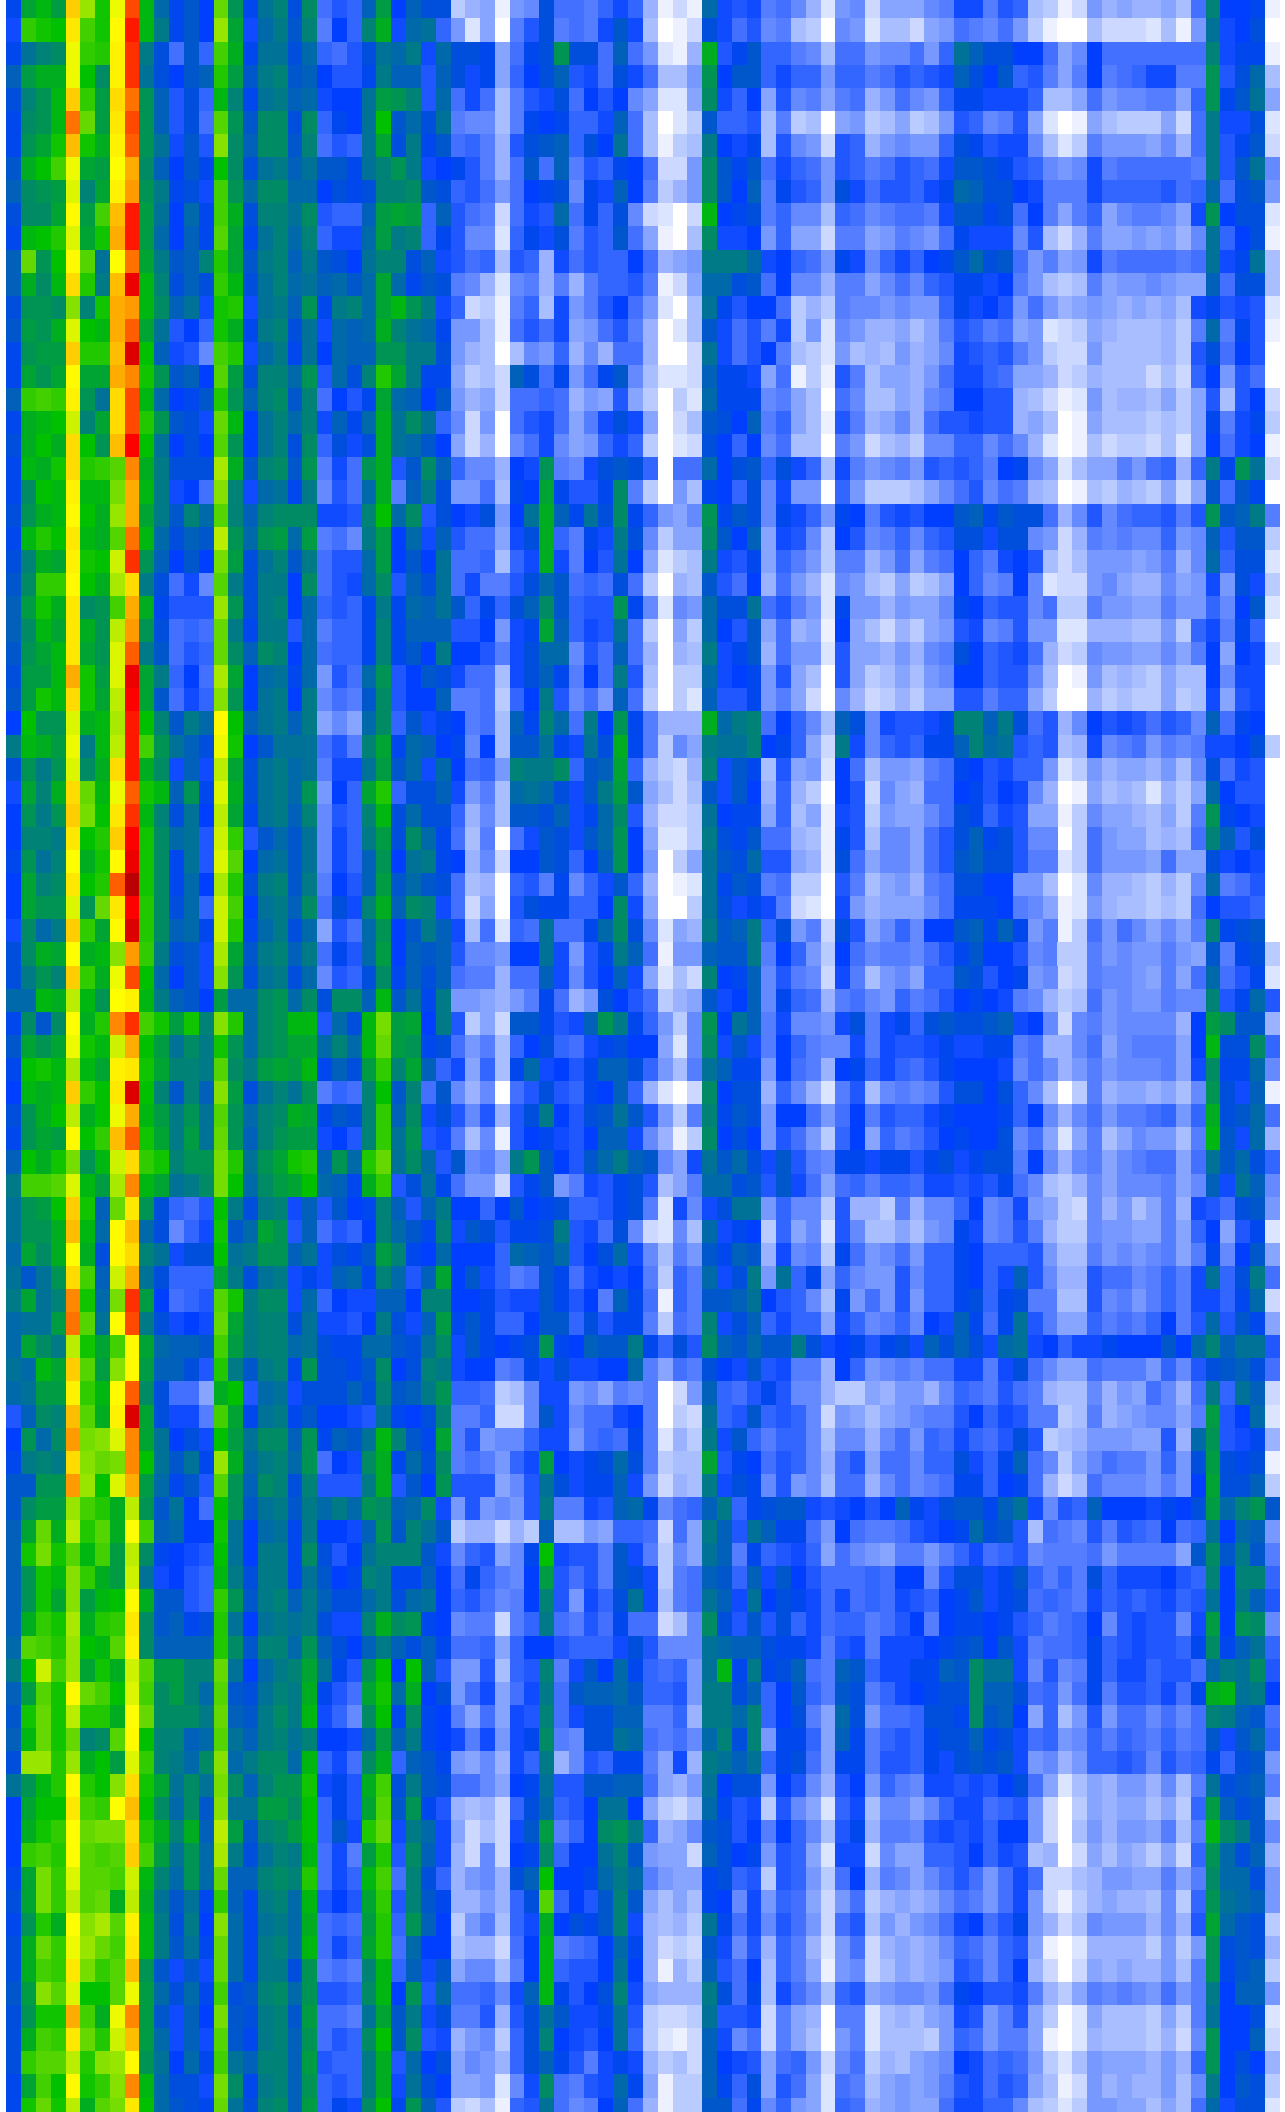

At3g62410  
At5g03880  
At1g64720  
At1g22690  
At5g61670  
At1g04350  
At1g68830  
At3g59060  
At5g35970  
At2g22990  
At2g25080  
At1g65490  
At2g41110  
At5g39080  
At1g53670  
At4g15550  
At1g50020  
At5g19855  
At4g02920  
At1g79510  
At4g14070  
At5g19540  
At3g01960  
At3g18500  
At5g38510  
At1g21640  
At4g09900  
At4g04770  
At1g79600  
At5g50920  
At1g54520  
At5g54770  
At5g03910  
At4g36530  
At1g49970  
At1g68660  
At5g48590  
At4g38225  
At4g28025  
At2g28800  
At3g17930  
At4g09900  
At4g28740  
At1g22750  
At3g26630  
At4g17970  
At1g79770  
At2g27290  
At1g76190  
At4g14480  
At1g11340  
At3g05370  
At5g36160  
At1g06430  
At5g50100  
At3g61230  
At1g70730  
At4g10120  
At5g58300  
At3g26320  
At4g04040  
At1g22630  
At3g10525  
At1g07440  
At2g29320  
At4g13770  
At1g78620  
At5g61660  
At5g23010  
At1g73600  
At5g10180  
At1g06830  
At5g11250  
At2g23200  
At3g22231  
At3g44450  
At3g45140  
At5g43740  
At1g71480  
At4g10000  
At3g58010  
At1g07280  
At1g06460  
At4g27800  
At3g15840  
At5g05190  
At2g23840  
At1g52870  
At5g57040  
At5g18600  
At5g14970  
At5g65840



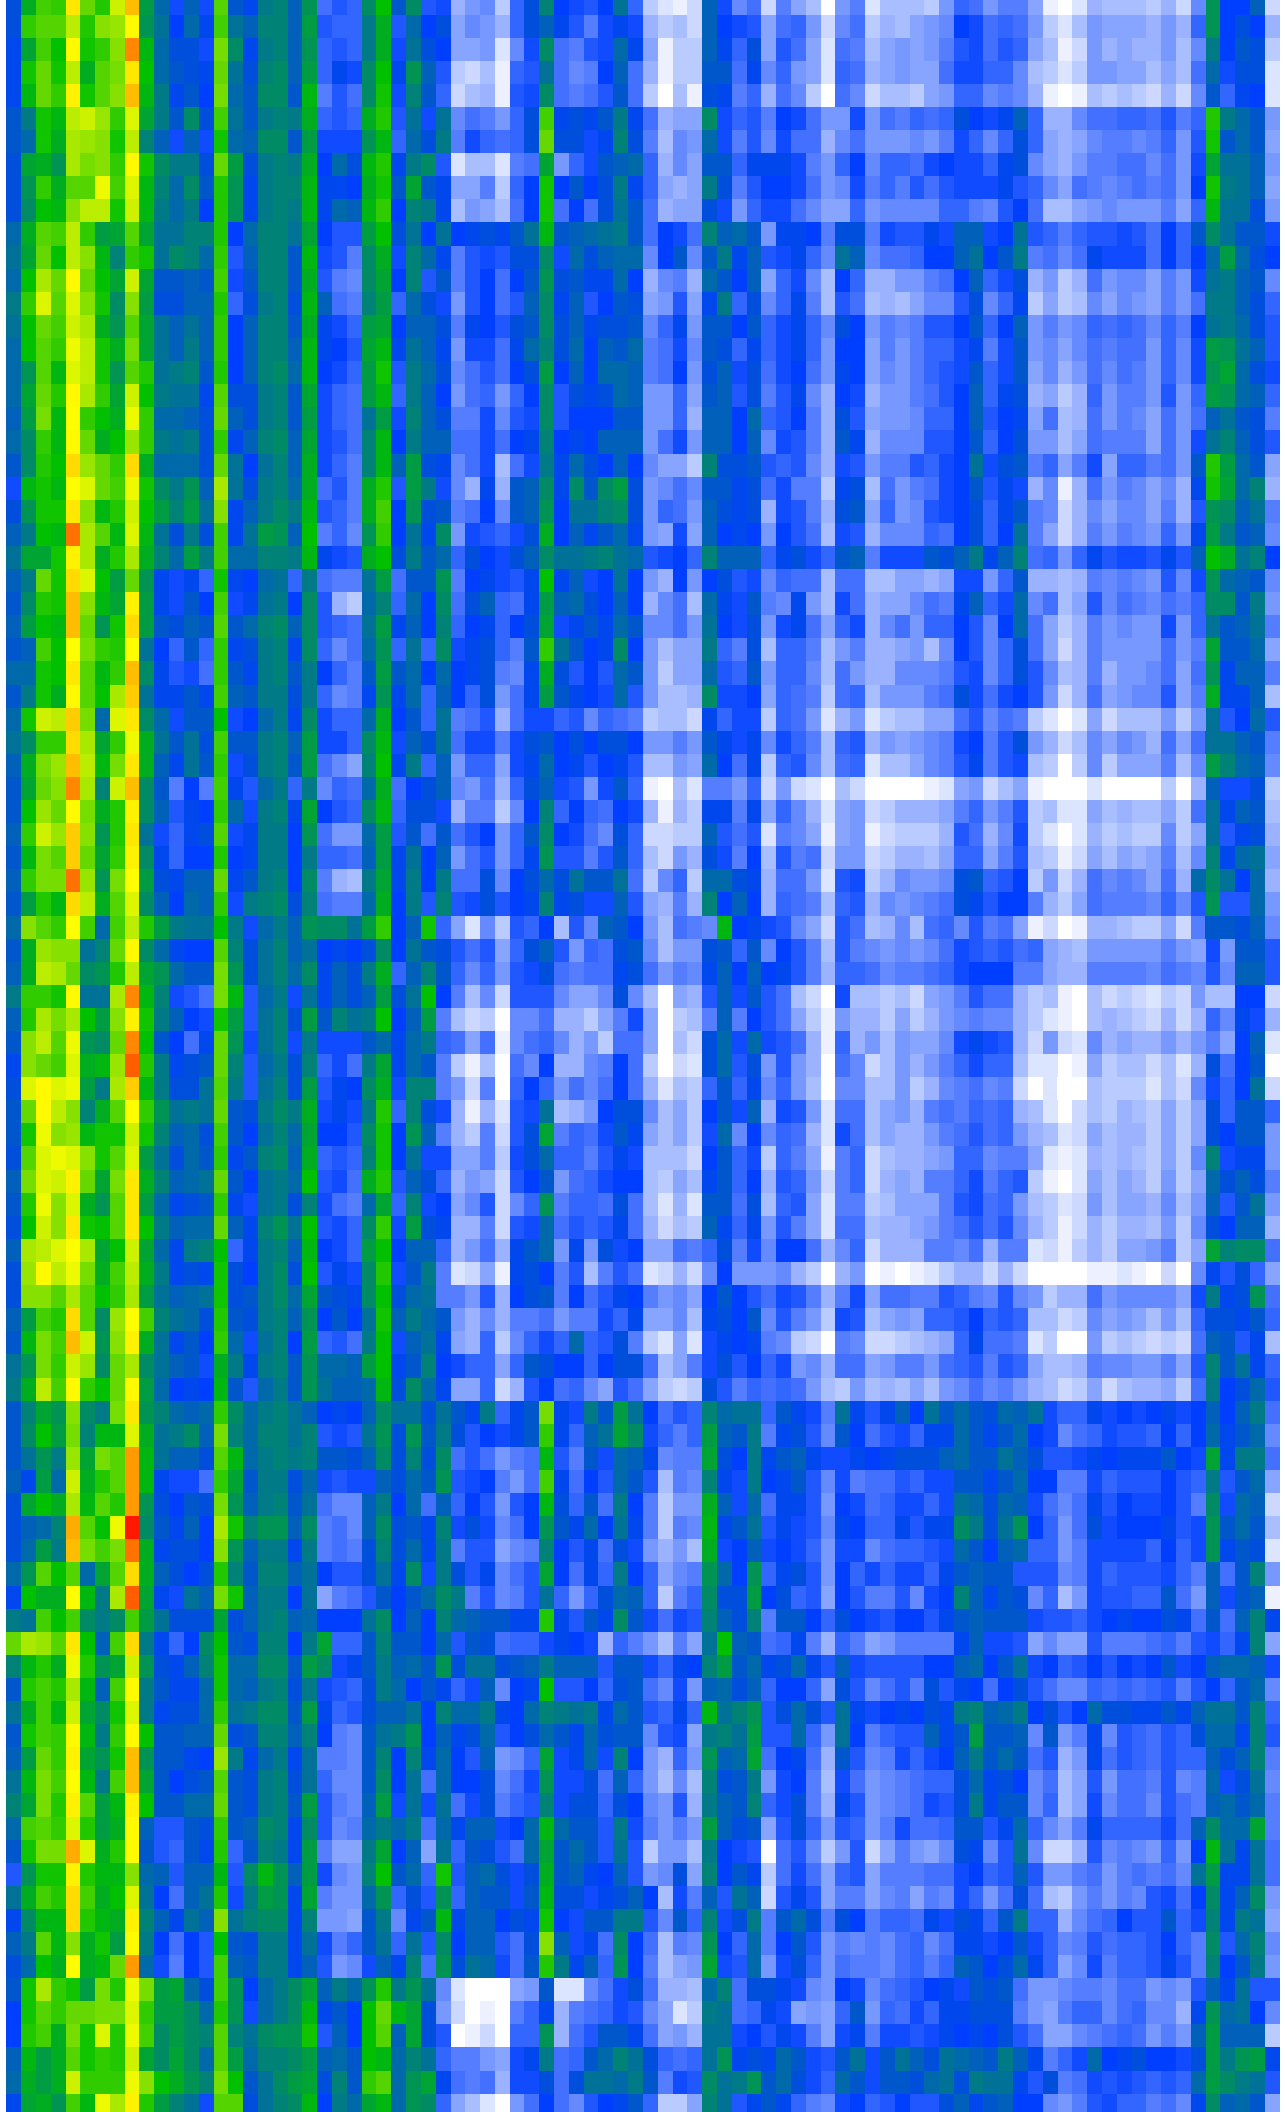

At5g97040  
At5g18600  
At5g14970  
At5g65840  
At4g25650  
At3g26740  
At3g62550  
At2g29630  
At5g06690  
At4g32340  
At2g47880  
At1g21250  
At2g32160  
At3g04210  
At1g35710  
At3g45860  
At2g14560  
At1g21270  
At4g14400  
At5g54610  
At1g11350  
At3g04890  
At4g13810  
At5g11060  
At2g24160  
At5g04260  
At4g11900  
At2g32290  
At2g03310  
At5g64770  
At5g25840  
At3g16220  
At3g26230  
At1g03400  
At1g06650  
At1g63880  
At1g23130  
At2g46100  
At1g78200  
At4g37980  
At1g28600  
At4g23290  
At4g23300  
At5g42390  
At5g44580  
At4g16990  
At3g23400  
At5g46450  
At1g74640  
At3g45260  
At2g40880  
At5g44870  
At4g16950  
At2g14080  
At2g37540  
At2g24860  
At1g03020  
At1g55910  
At3g47250  
At4g27300  
At2g16380  
At4g27820  
At5g59130  
At5g63780  
At1g78995  
At1g73470  
At3g53920  
At2g03550  
At4g16880  
At4g35000  
At3g26290  
At3g44630  
At1g56520  
At4g17090  
At2g21650  
At1g29720  
At1g05200  
At4g16890  
At5g36930  
At2g39850  
At3g15353  
At5g46240  
At5g57350  
At5g65620  
At1g70820  
At4g26530  
At5g19250  
At2g05520  
At1g29390  
At1g65860  
At4g23240  
At1g32540

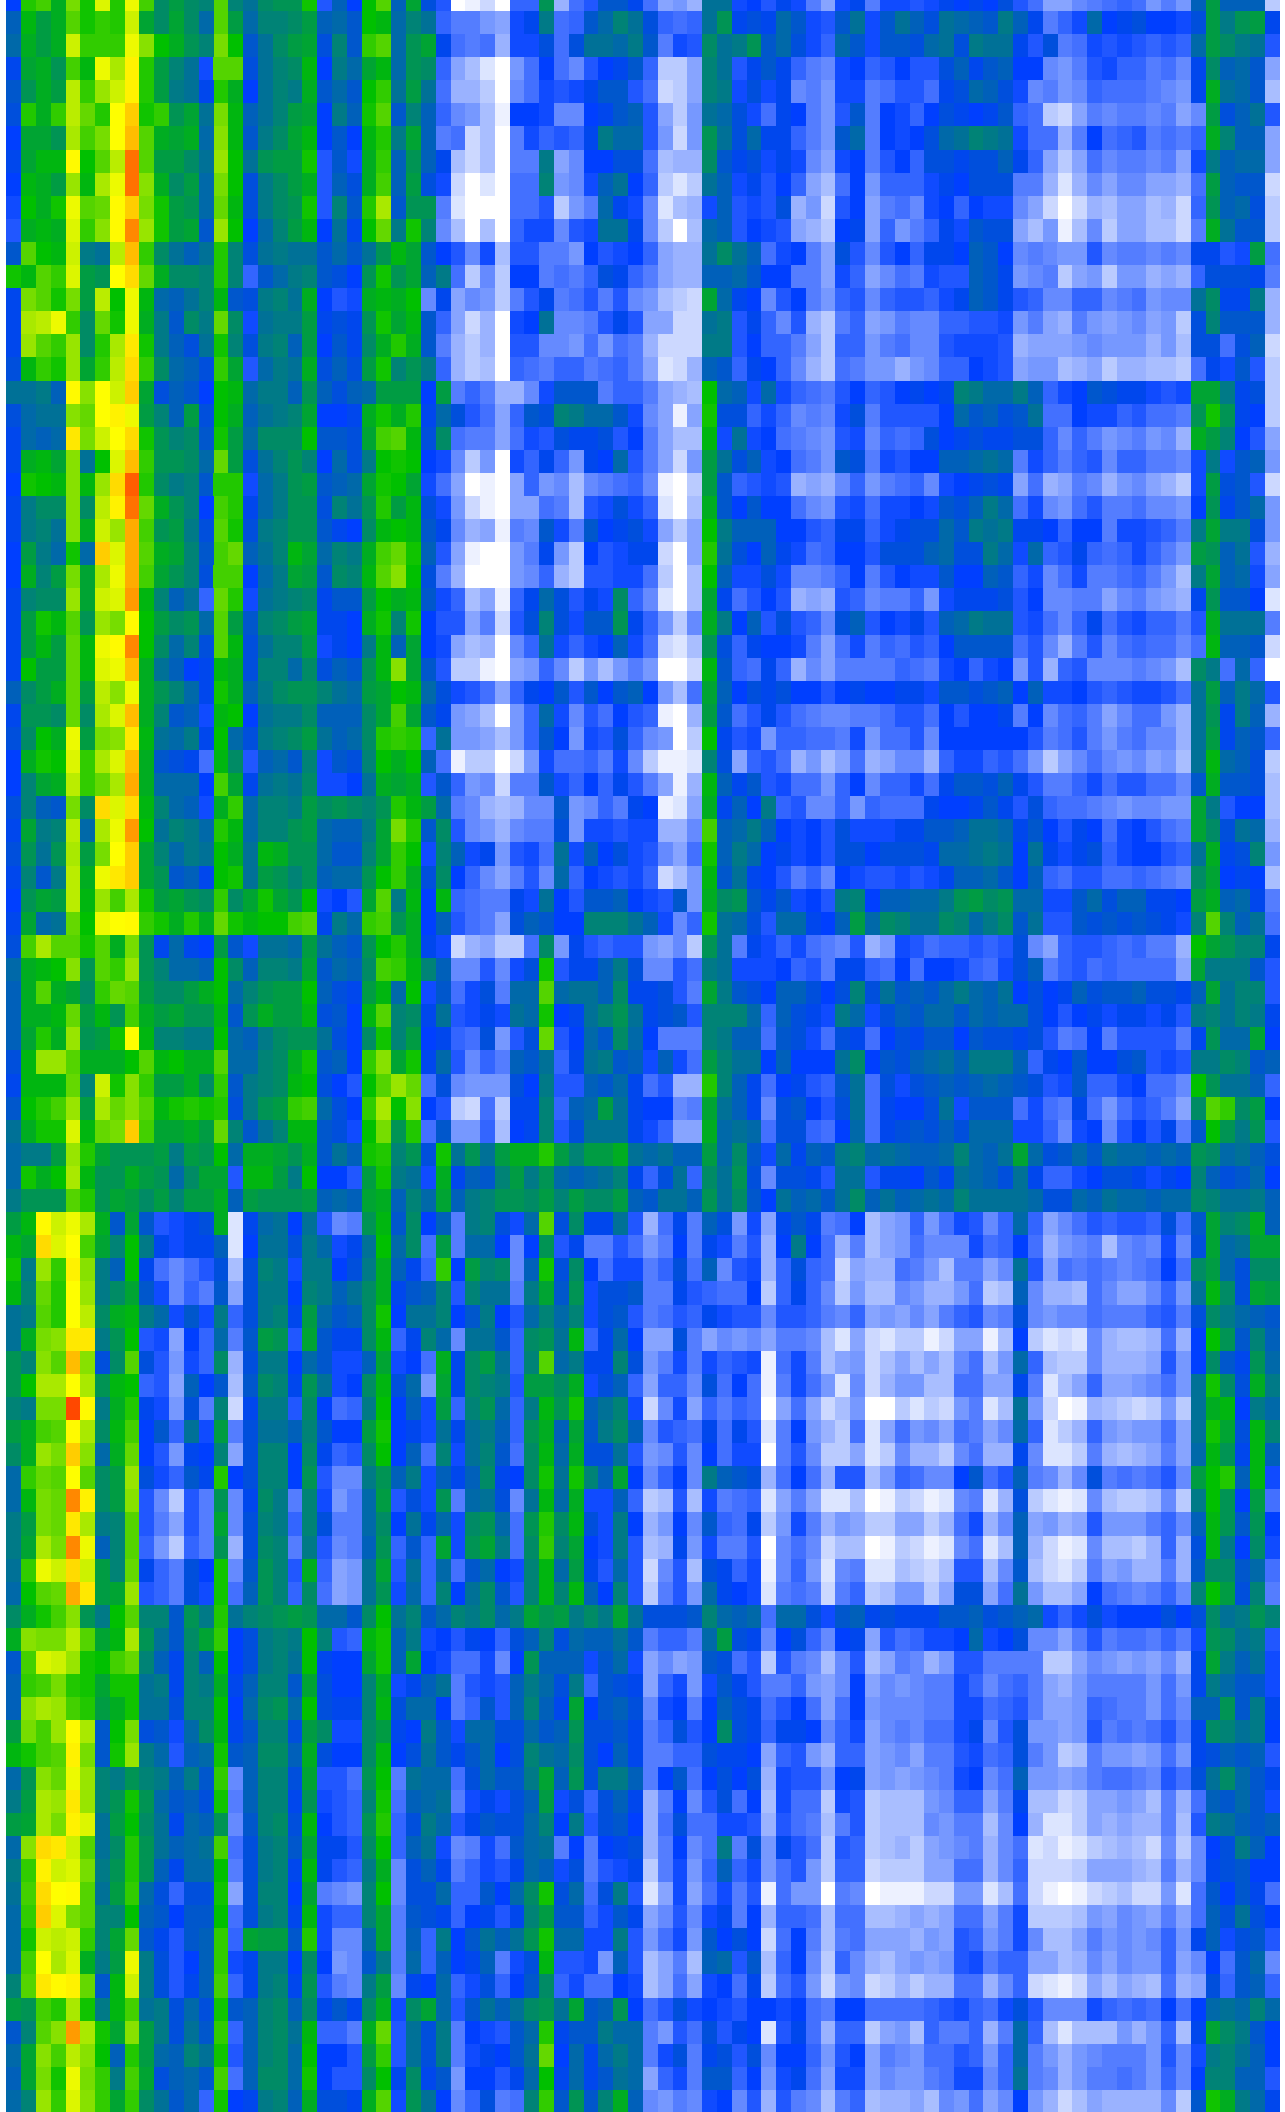

At1g23330  
At1g65860  
At4g23240  
At1g32540  
At5g04490  
At2g07688  
At3g50750  
At5g40060  
At5g08410  
At5g13730  
At2g20725  
At5g17600  
At5g60750  
At1g72180  
At1g29680  
At5g15410  
At5g63020  
At1g60010  
At5g05690  
At5g42750  
At2g39250  
At2g45180  
At4g27710  
At5g63180  
At4g38770  
At1g09310  
At3g45780  
At2g43010  
At5g02160  
At2g39010  
At4g38850  
At3g52840  
At4g10770  
At2g42590  
At2g15050  
At1g33240  
At2g32560  
At1g29440  
At1g14280  
At3g55130  
At4g38700  
At1g65970  
At1g71710  
At5g50450  
At4g24010  
At2g22190  
At3g45290  
At5g25610  
At1g12990  
At1g05030  
At3g57680  
At2g33380  
At3g03480  
At2g22430  
At5g49760  
At1g07640  
At5g54660  
At1g72900  
At3g56360  
At3g04030  
At5g64240  
At1g75410  
At1g79430  
At5g02600  
At2g32860  
At4g19840  
At1g67870  
At1g64370  
At1g67865  
At1g67860  
At4g09880  
At4g23180  
At5g59080  
At4g15700  
At4g15660  
At5g58120  
At5g46500  
At3g28540  
At3g08870  
At3g14620  
At2g29120  
At5g24210  
At4g03410  
At2g15080  
At3g53720  
At4g16860  
At4g23260  
At3g18290  
At5g41410  
At5g23240  
At1g68600  
At5g11610

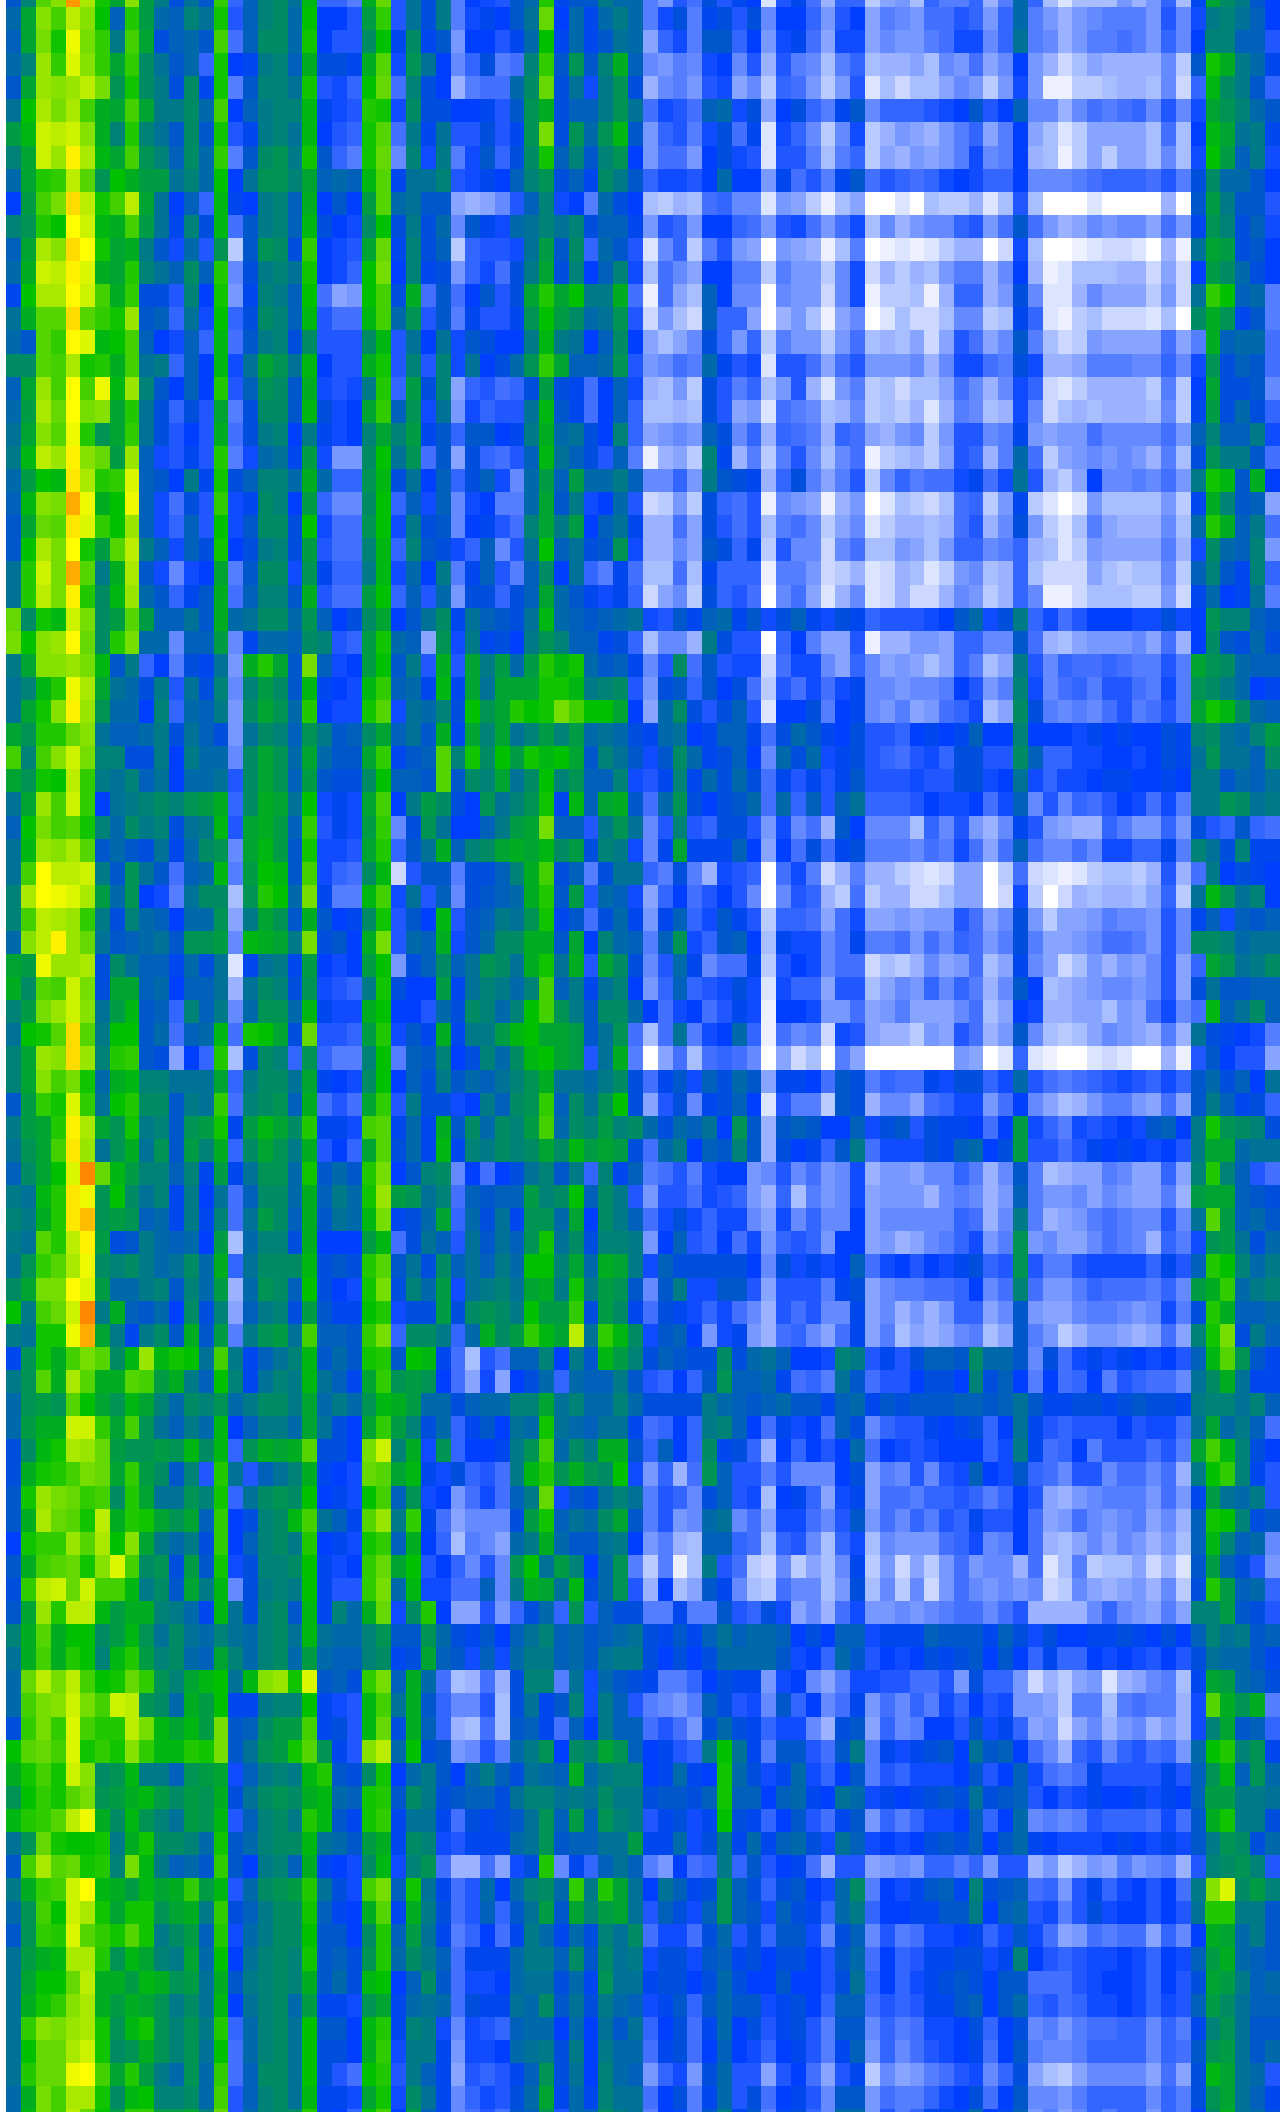

At5g23240  
At1g68600  
At5g11610  
At5g27280  
At2g15040  
At5g43430  
At2g03530  
At1g09240  
At1g31940  
At1g30260  
At3g11660  
At5g39030  
At5g19150  
At1g22710  
At3g26280  
At1g73750  
At3g56060  
At5g63800  
At2g41870  
At3g56050  
At5g18240  
At4g00780  
At3g61210  
At2g29670  
At3g25570  
At4g13345  
At3g23010  
At5g53130  
At1g80960  
At3g03470  
At1g52880  
At5g39090  
At1g69490  
At5g22860  
At5g52450  
At1g69870  
At5g17860  
At5g40370  
At5g45350  
At5g17450  
At5g65870  
At1g76520  
At4g27830  
At5g04220  
At3g07700  
At3g27120  
At5g22300  
At4g15490  
At4g24450  
At1g69610  
At5g58560  
At1g31820  
At4g14020  
At1g76960  
At1g64360  
At4g28490  
At3g26220  
At3g60180  
At2g40600  
At2g41180  
At3g55500  
At1g70900  
At1g28230  
At1g20620  
At1g29395  
At5g05090  
At1g76020  
At3g59950  
At2g15960  
At5g61520  
At5g44420  
At2g26020  
At4g25940  
At2g25200  
At1g17610  
At1g59620  
At1g72920  
At5g52740  
At2g17040  
At3g57240  
At4g34950  
At1g23840  
At5g64800  
At5g35480  
At1g30250  
At2g14610  
At1g75040  
At2g32670  
At3g57260  
At5g10380  
At5g10760

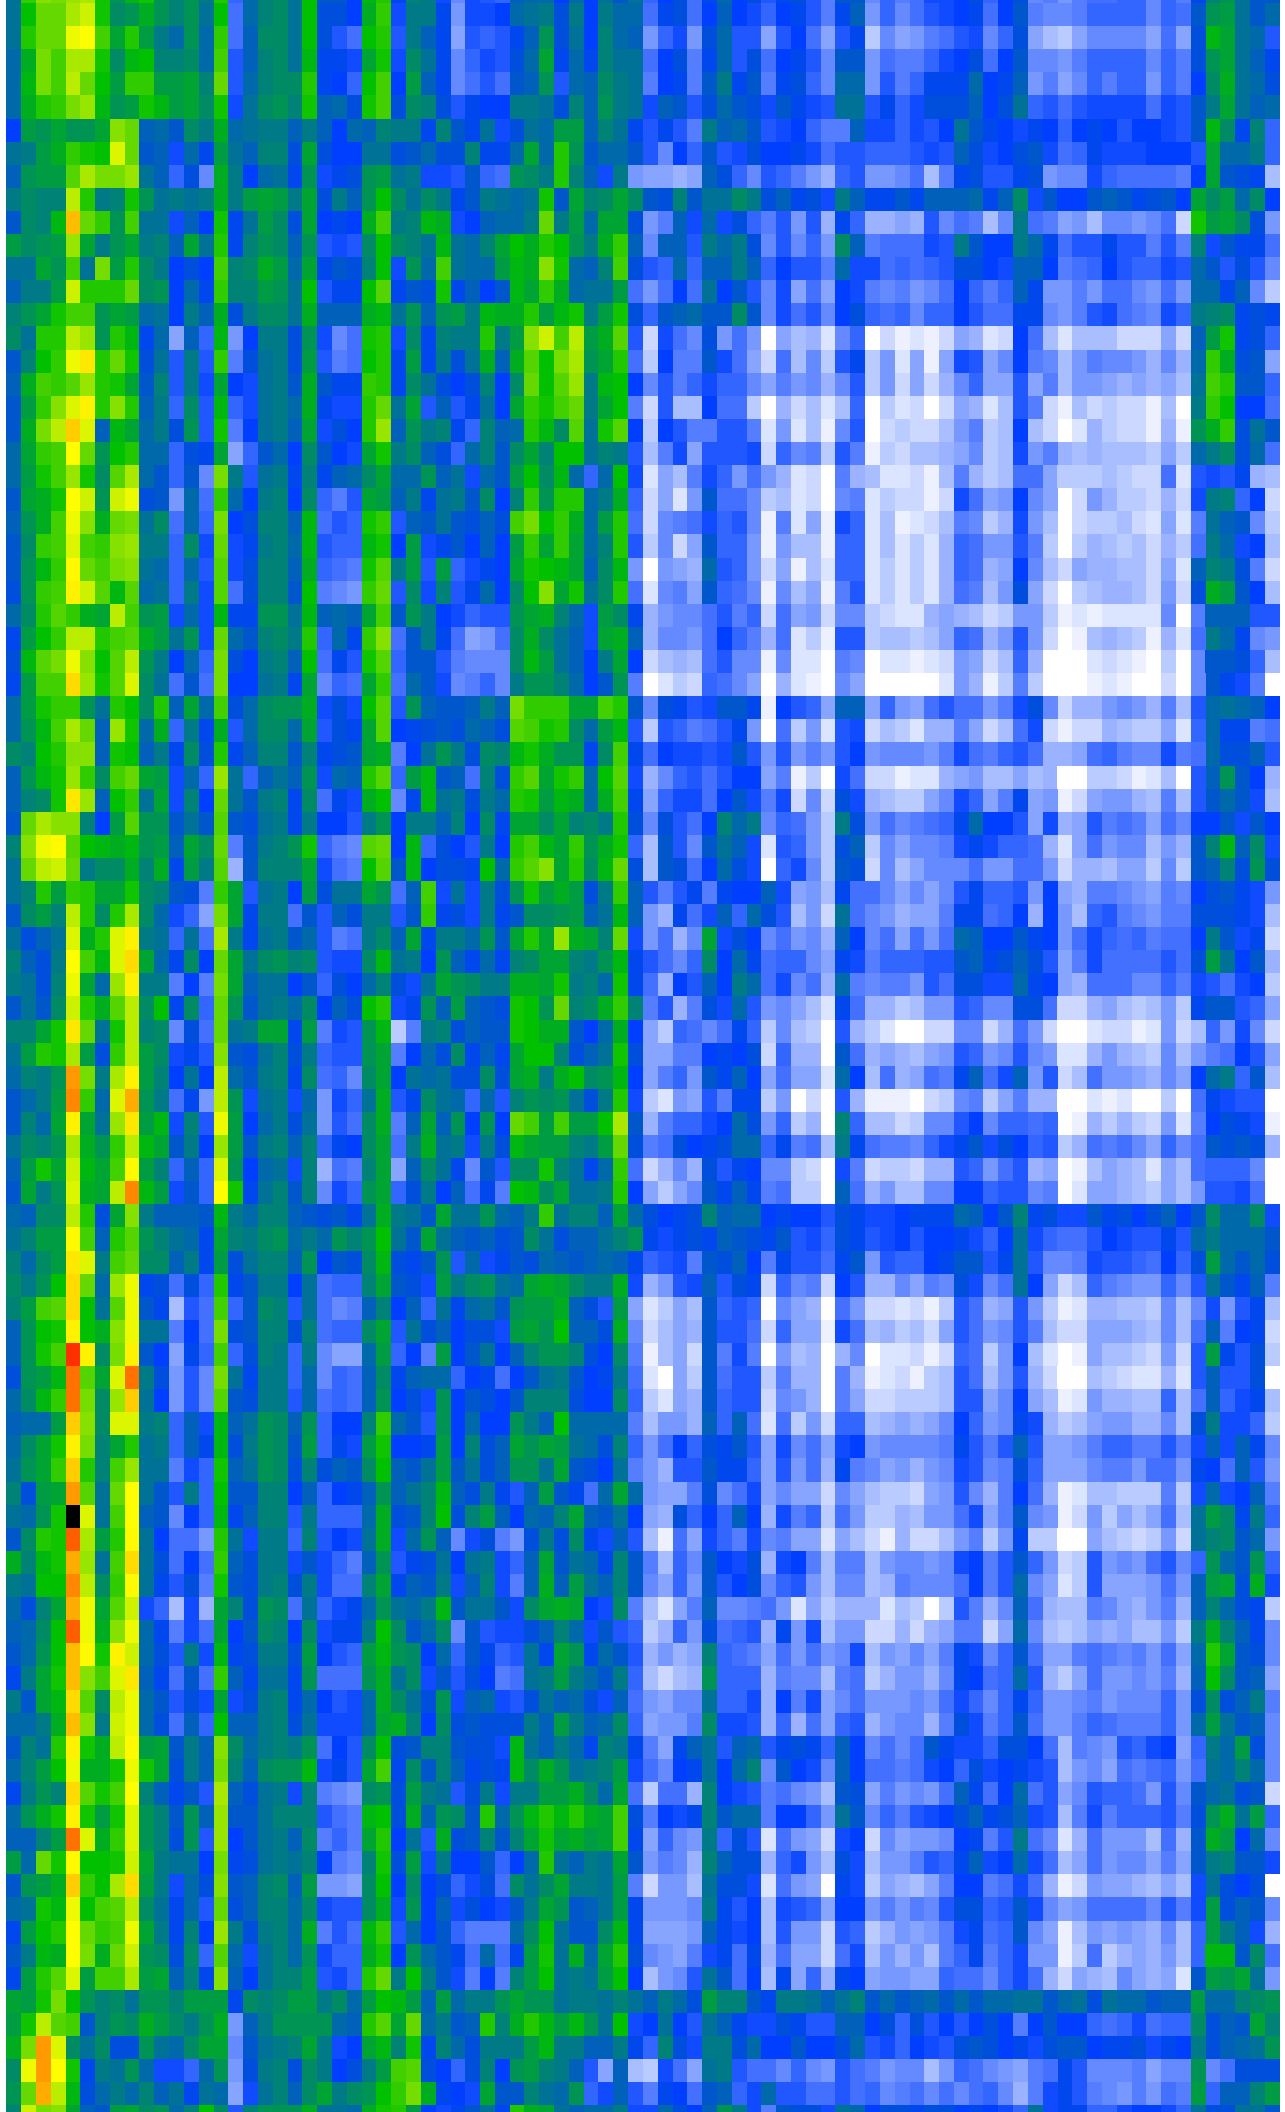

At3g57260  
At5g10380  
At5g10760  
At5g60900  
At3g25010  
At4g15690  
At3g62950  
At3g03150  
At4g39210  
At5g20280  
At1g58360  
At2g45560  
At4g13250  
At2g19310  
At1g21680  
At2g39000  
At5g61590  
At1g11540  
At4g12300  
At1g63900  
At3g53280  
At2g14910  
At2g20920  
At4g13830  
At3g19900  
At3g26580  
At5g24460  
At1g10500  
At5g11840  
At4g27990  
At5g43860  
At5g43260  
At5g24160  
At5g67290  
At3g21790  
At4g36220  
At4g01026  
At1g75370  
At1g78270  
At4g00030  
At3g07310  
At4g31110  
At4g25450  
At1g80940  
At3g03890  
At4g37560  
At3g56630  
At5g44000  
At2g43180  
At4g33510  
At5g54290  
At3g16360  
At4g26950  
At4g37310  
At4g13550  
At4g11570  
At2g42750  
At1g31170  
At3g63520  
At1g77930  
At1g59700  
At3g44880  
At3g10420  
At3g27820  
At2g23430  
At5g46270  
At3g25740  
At1g12280  
At3g54360  
At2g21970  
At3g13062  
At4g08920  
At5g25120  
At5g43850  
At4g00752  
At3g46980  
At5g64280  
At3g08840  
At1g13090  
At1g21590  
At4g29070  
At4g19170  
At4g27390  
At4g17370  
At5g18760  
At5g53710  
At5g41330  
At1g17330  
At3g02750  
At2g43160  
At4g18880

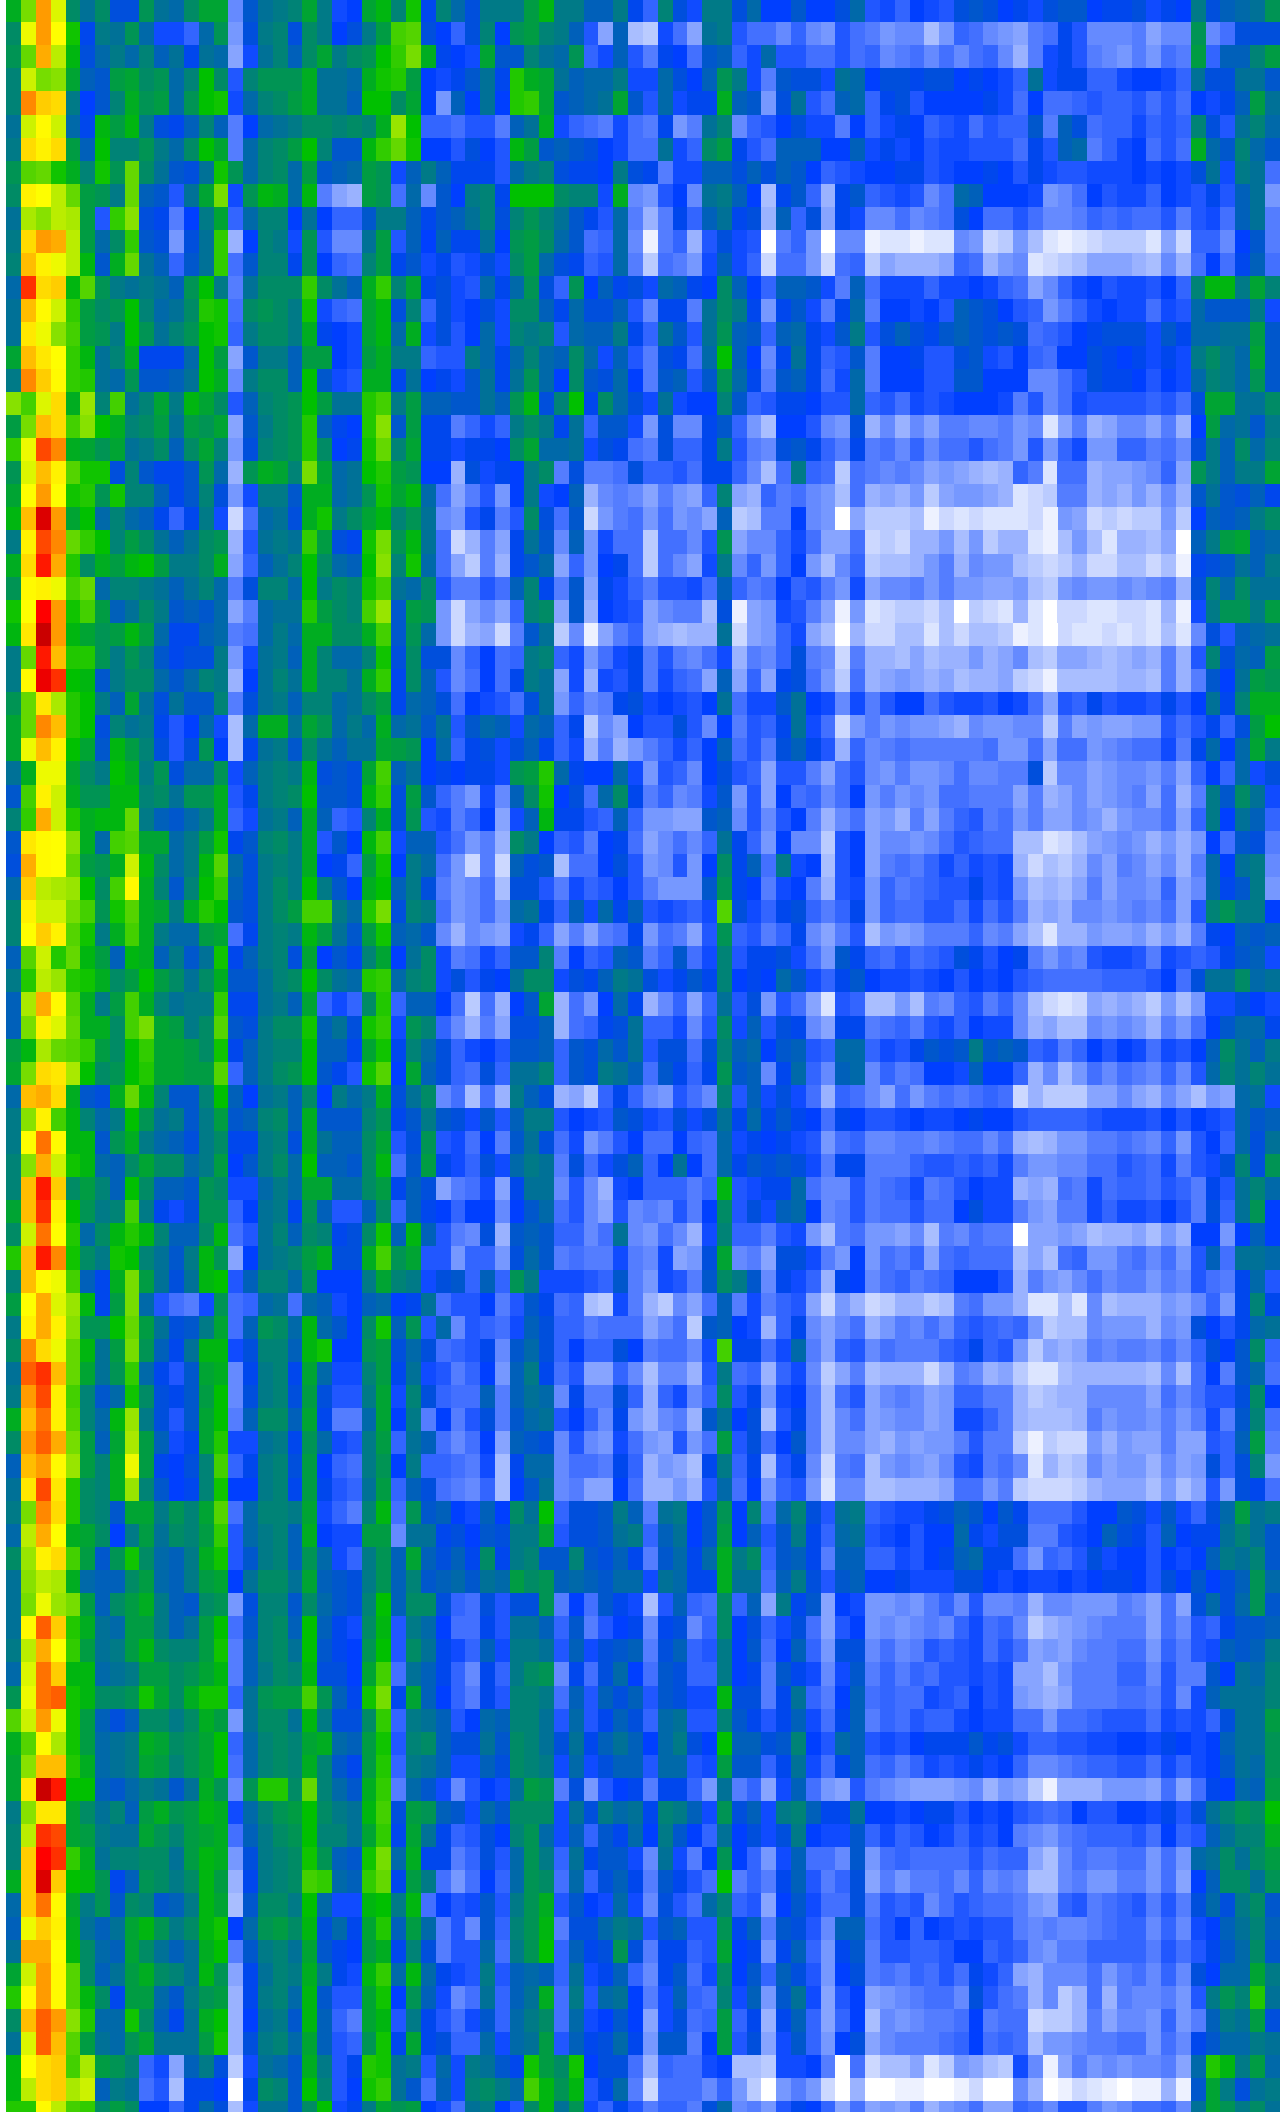

At1g17330  
At3g02750  
At2g43160  
At4g12000  
At1g27910  
At1g30360  
At1g64380  
At1g75960  
At1g58200  
At3g17790  
At5g57710  
At1g76130  
At4g24370  
At1g70700  
At2g20340  
At5g59730  
At1g72450  
At1g72060  
At5g22270  
At2g39400  
At1g28240  
At1g25560  
At1g08930  
At4g00330  
At3g29400  
At3g56200  
At1g59870  
At2g44490  
At1g13110  
At3g04110  
At4g39940  
At2g01670  
At3g03990  
At1g21670  
At1g22570  
At1g21130  
At3g02150  
At4g29670  
At1g56510  
At1g67470  
At5g19240  
At4g23600  
At4g10990  
At4g34120  
At4g23130  
At4g04220  
At4g23320  
At5g16010  
At4g24350  
At3g16530  
At3g28930  
At2g30990  
At1g33590  
At3g57750  
At4g11330  
At2g29450  
At3g22890  
At3g09920  
At4g00970  
At1g35350  
At5g42650  
At5g53050  
At3g07040  
At1g51805  
At1g33600  
At4g21380  
At2g26440  
At4g23570  
At5g47330  
At2g39710  
At3g50480  
At4g03450  
At3g51660  
At3g57700  
At2g24850  
At1g74710  
At4g11890  
At3g19010  
At4g23280  
At4g25110  
At1g25390  
At1g13210  
At5g47240  
At3g05660  
At1g02270  
At2g13790  
At5g58670  
At3g50950  
At2g37710  
At2g41430  
At5g54940  
At1g12260

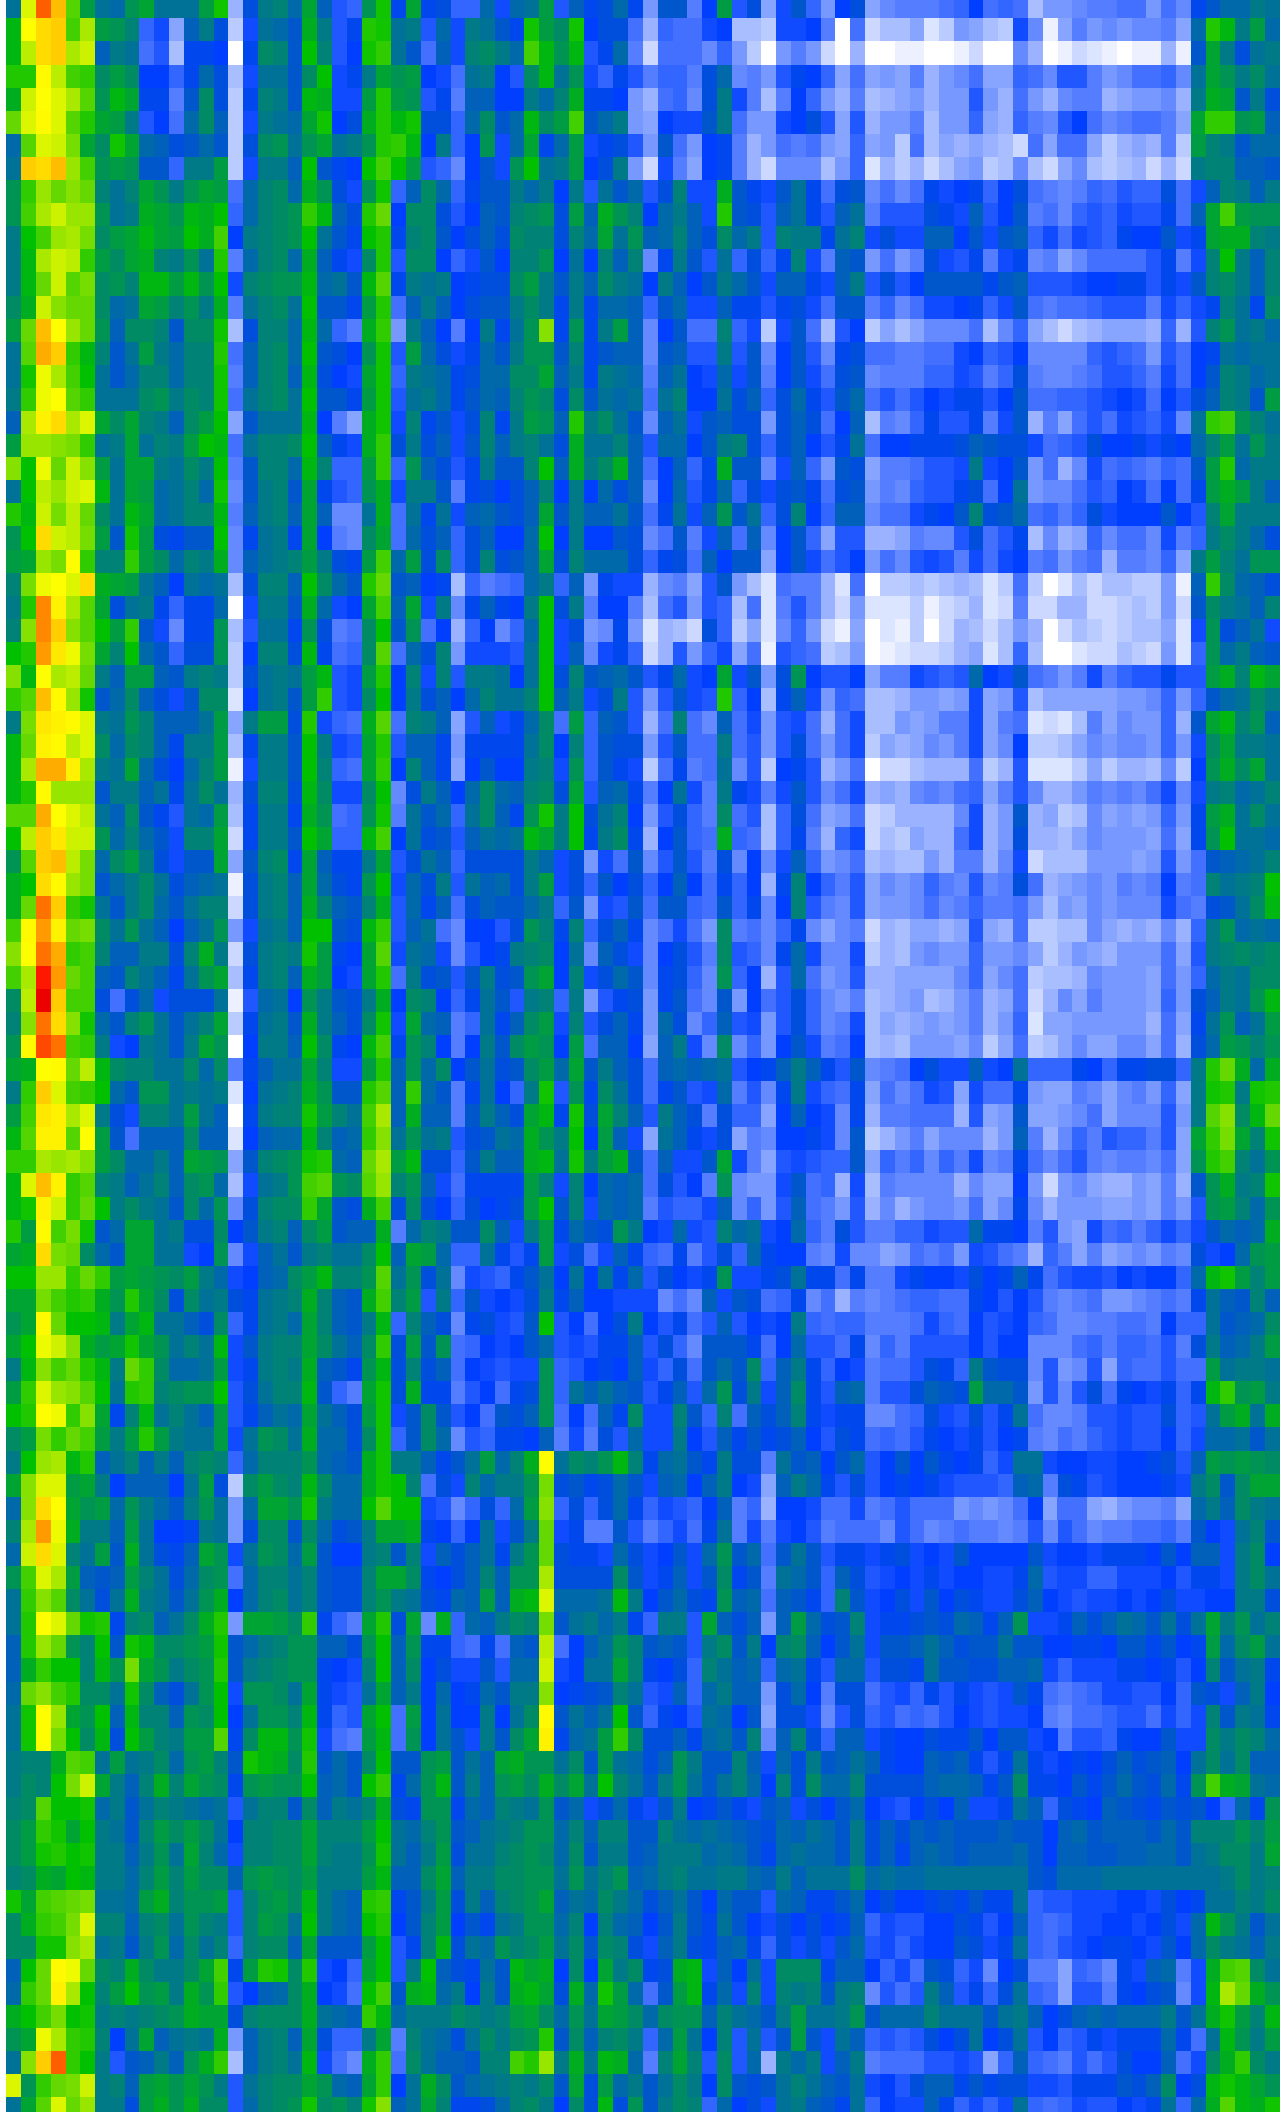

At2g37710  
At2g41430  
At5g54940  
At1g13260  
At1g27100  
At1g19770  
At4g36800  
At2g32810  
At3g60420  
At4g23620  
At4g23310  
At1g13470  
At4g04500  
At1g21240  
At1g67970  
At4g23230  
At3g28890  
At4g23150  
At3g63420  
At2g46510  
At3g56710  
At1g08450  
At3g56400  
At4g08470  
At1g65540  
At2g46600  
At2g02360  
At5g01750  
At5g40170  
At4g26100  
At4g02410  
At5g12890  
At2g31890  
At2g40270  
At1g72900  
At4g29050  
At5g02290  
At4g00955  
At5g61010  
At4g14610  
At3g45640  
At5g06320  
At5g39020  
At4g31500  
At4g13510  
At5g48380  
At3g25070  
At1g13000  
At2g19130  
At5g21090  
At2g38790  
At3g56410  
At1g15890  
At2g31230  
At1g65540  
At2g25190  
At2g23330  
At2g36470  
At1g64400  
At3g22240  
At4g26070  
At4g29810  
At5g52810  
At1g11210  
At1g20450  
At1g10090  
At5g62360  
At5g52310  
At1g51090  
At5g48370  
At4g30650  
At2g42530  
At2g42540  
At1g56300  
At4g14230  
At2g37770  
At4g25000  
At4g33540  
At1g26390  
At2g14620  
At3g21500  
At2g25440  
At3g50770  
At2g29350  
At1g69720  
At4g03080  
At3g48640  
At2g40750  
At4g02340  
At1g21525  
At2g25000

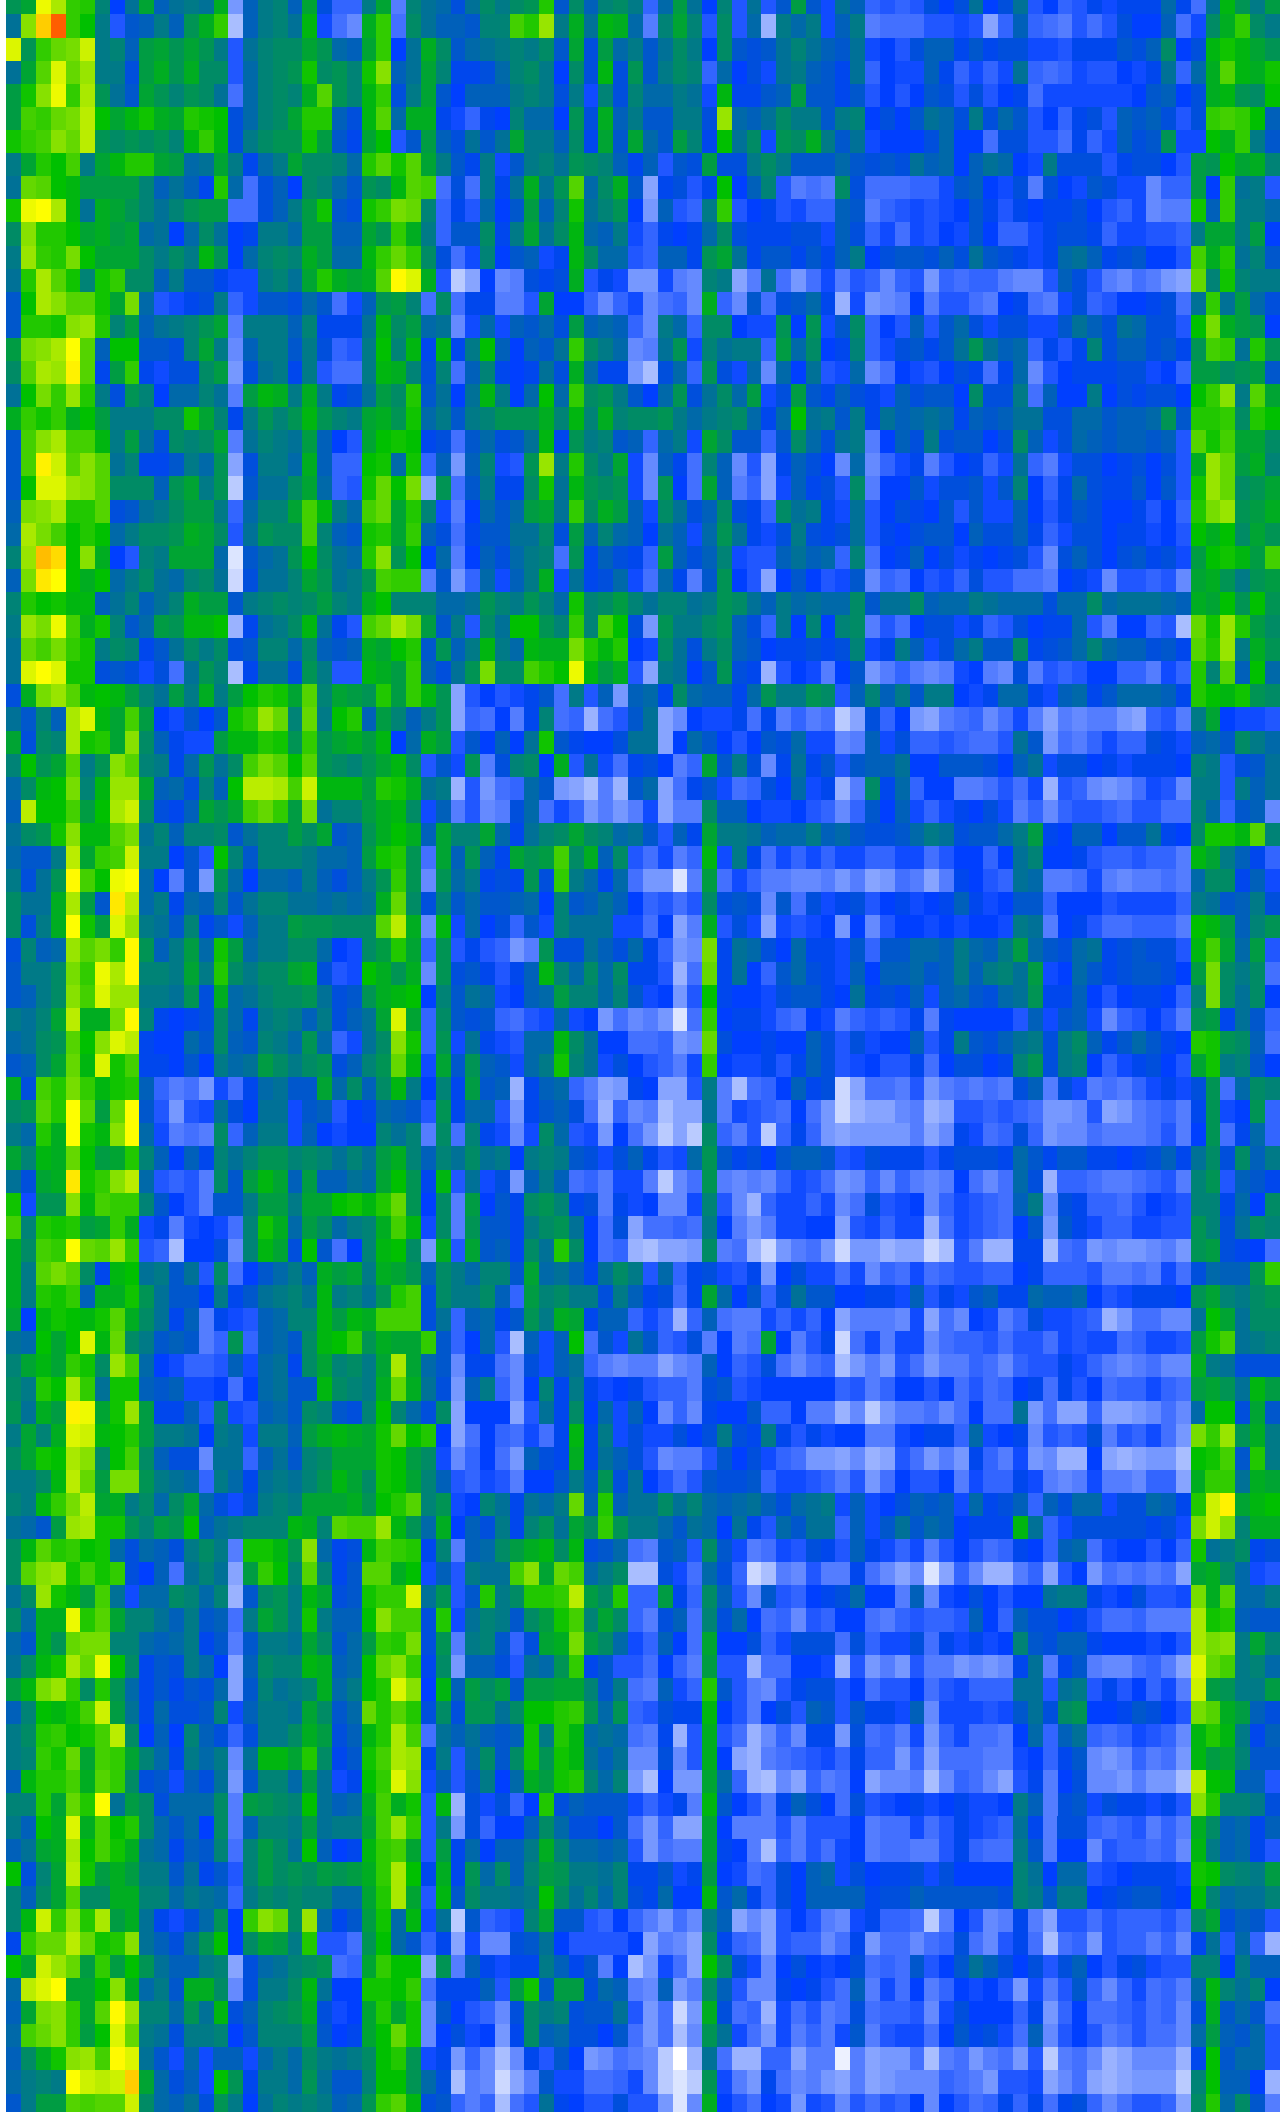

At2g40730  
At4g02340  
At1g21525  
At2g25000  
At5g64000  
At1g56150  
At1g20350  
At3g61010  
At4g26480  
At5g04550  
At3g19680  
At2g45680  
At2g45670  
At3g46010  
At1g48440  
At1g51950  
At4g19450  
At4g22580  
At1g68200  
At2g15320  
At1g05805  
At1g03430  
At2g25250  
At1g19300  
At1g77420  
At4g25660  
At1g65890  
At2g38610  
At1g17230  
At3g01560  
At3g46820  
At2g25610  
At3g59310  
At3g02470  
At2g01260  
At1g12240  
At4g14560  
At5g44410  
At1g19000  
At5g24120  
At1g19700  
At5g08370  
At2g22980  
At1g29460  
At3g26450  
At3g13750  
At1g29450  
At5g28020  
At2g15680  
At1g07250  
At2g41470  
At5g13640  
At2g26570  
At1g73920  
At1g10150  
At1g10900  
At5g67390  
At4g03560  
At5g53160  
At1g61740  
At3g23000  
At4g11410  
At5g53370  
At2g23610  
At3g45210  
At5g19630  
At1g28570  
At2g47600  
At3g06790  
At2g37480  
At4g01840  
At3g22970  
At2g17550  
At5g48150  
At2g42040  
At1g80440  
At3g59090  
At5g60850  
At1g78680  
At3g14067  
At2g35060  
At5g10930  
At1g73390  
At1g66900  
At1g01140  
At1g73740  
At1g11260  
At1g71030  
At5g57660  
At1g49500  
At2g36430  
At1g70890

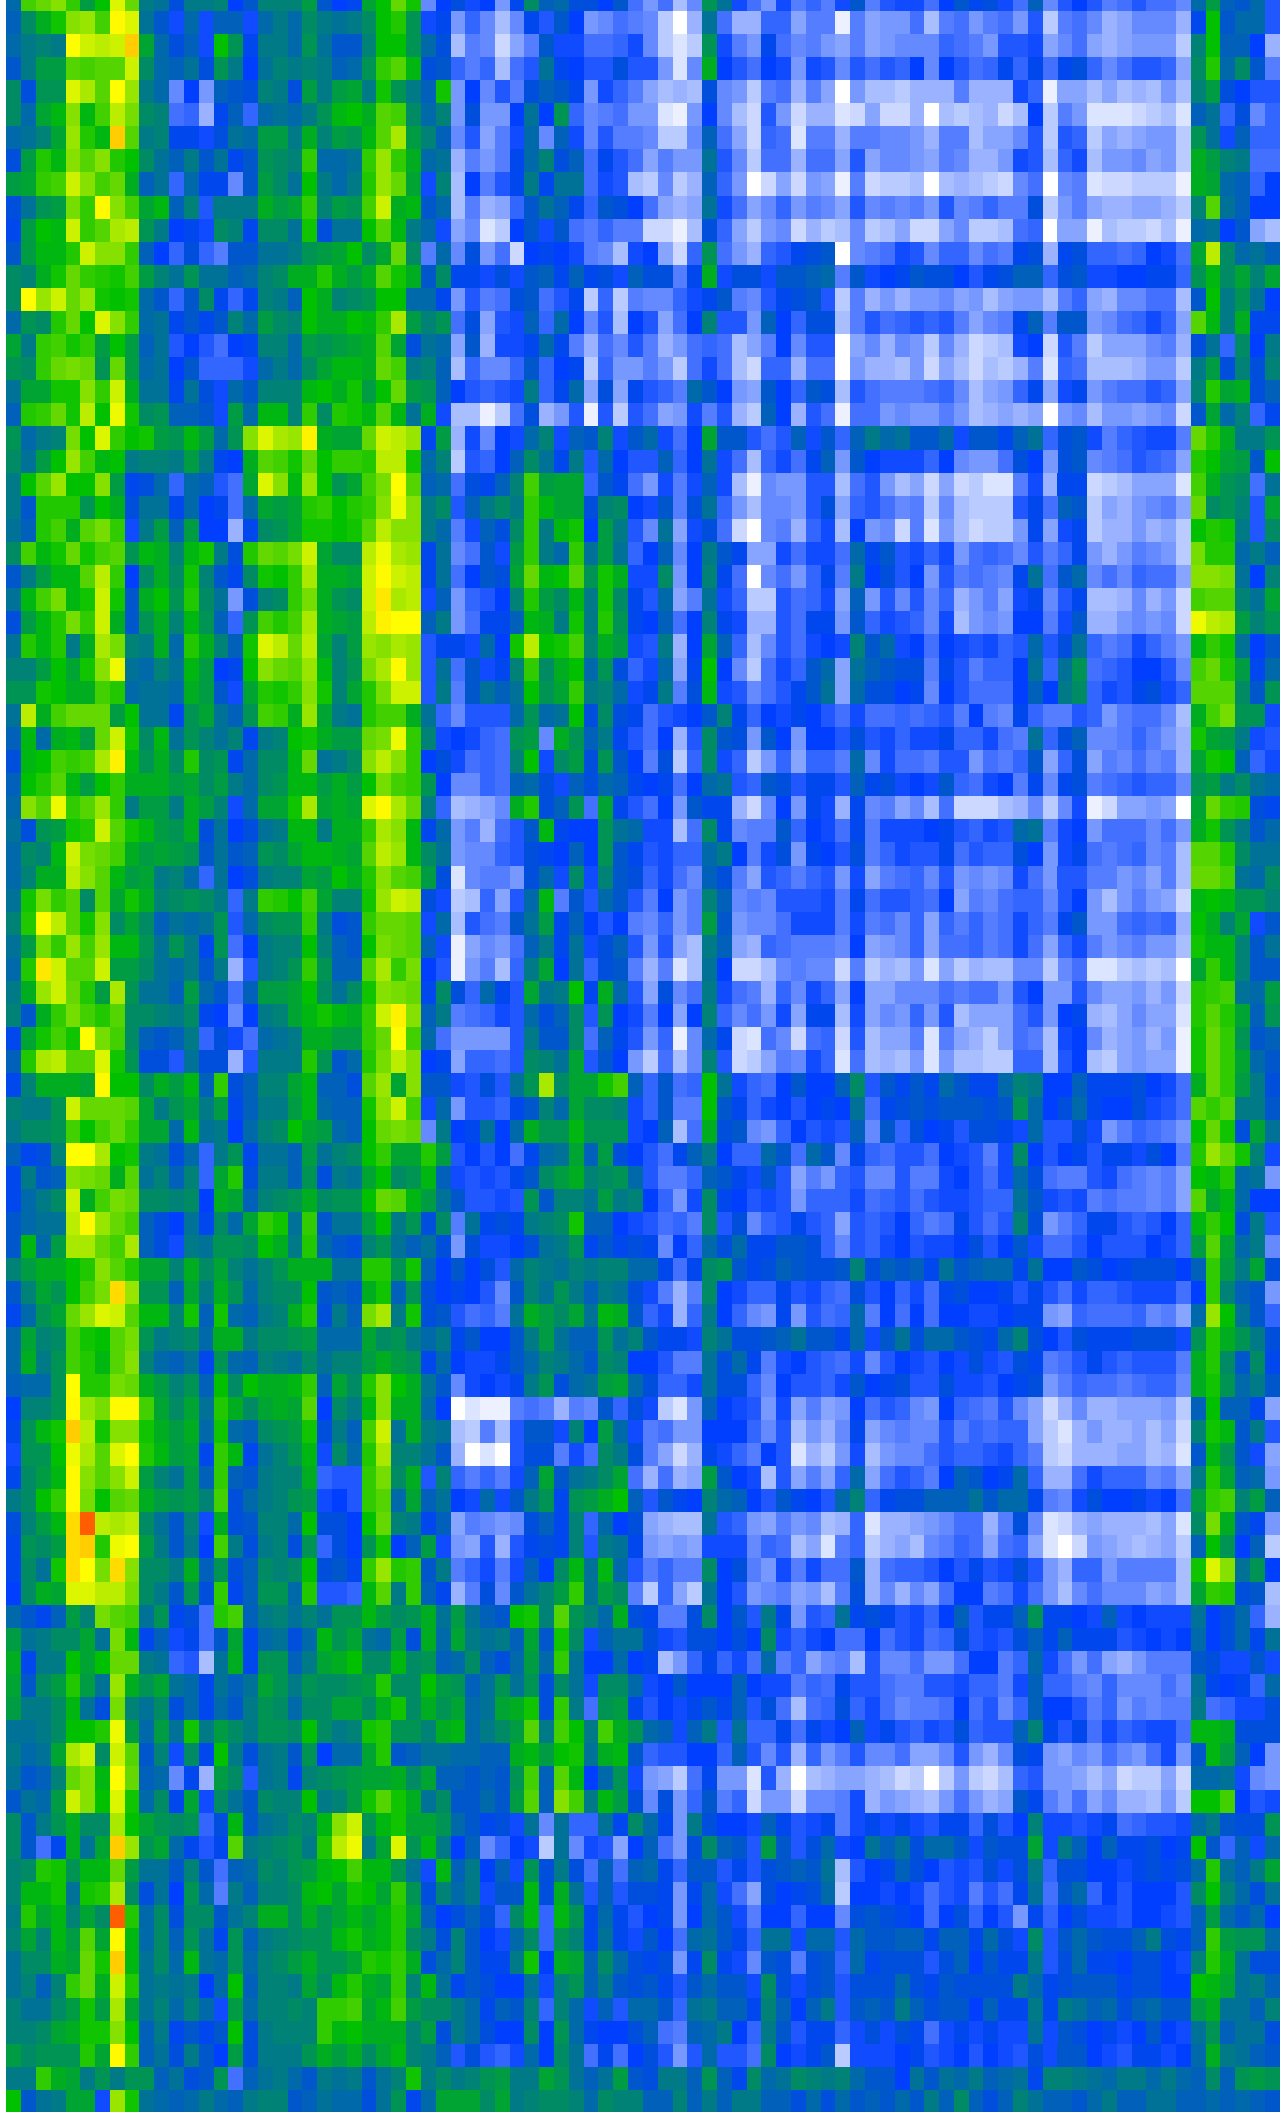

At3g71800  
At1g49500  
At2g36430  
At1g70890  
At5g58800  
At2g26670  
At5g47560  
At5g23660  
At1g53560  
At1g26920  
At3g48740  
At1g31812  
At1g03410  
At4g15800  
At1g76890  
At2g25450  
At5g27350  
At1g75750  
At5g17280  
At4g13020  
At5g27150  
At4g17170  
At4g31450  
At5g19860  
At1g60430  
At2g20740  
At5g65910  
At5g07250  
At3g61260  
At2g40420  
At3g03860  
At4g30440  
At4g25610  
At3g26510  
At5g59640  
At3g50830  
At4g37470  
At5g41400  
At5g20700  
At5g55960  
At1g50440  
At4g23730  
At3g19553  
At3g27090  
At5g06280  
At5g66040  
At1g72150  
At3g08510  
At5g47640  
At2g41200  
At1g33780  
At3g50440  
At1g15415  
At3g53950  
At5g11070  
At4g32280  
At1g77210  
At3g52070  
At1g78450  
At1g75280  
At3g56080  
At1g64850  
At3g28100  
At4g01940  
At4g11960  
At1g10920  
At2g15580  
At1g52590  
At2g21185  
At1g55000  
At3g01490  
At2g26980  
At2g27050  
At4g15550  
At5g65380  
At4g21510  
At3g57770  
At5g51970  
At4g28270  
At1g13080  
At5g03555  
At4g36410  
At5g20250  
At1g54740  
At3g07350  
At4g35770  
At1g49200  
At5g01740  
At5g62280  
At3g48360  
At2g01410  
At2g36750



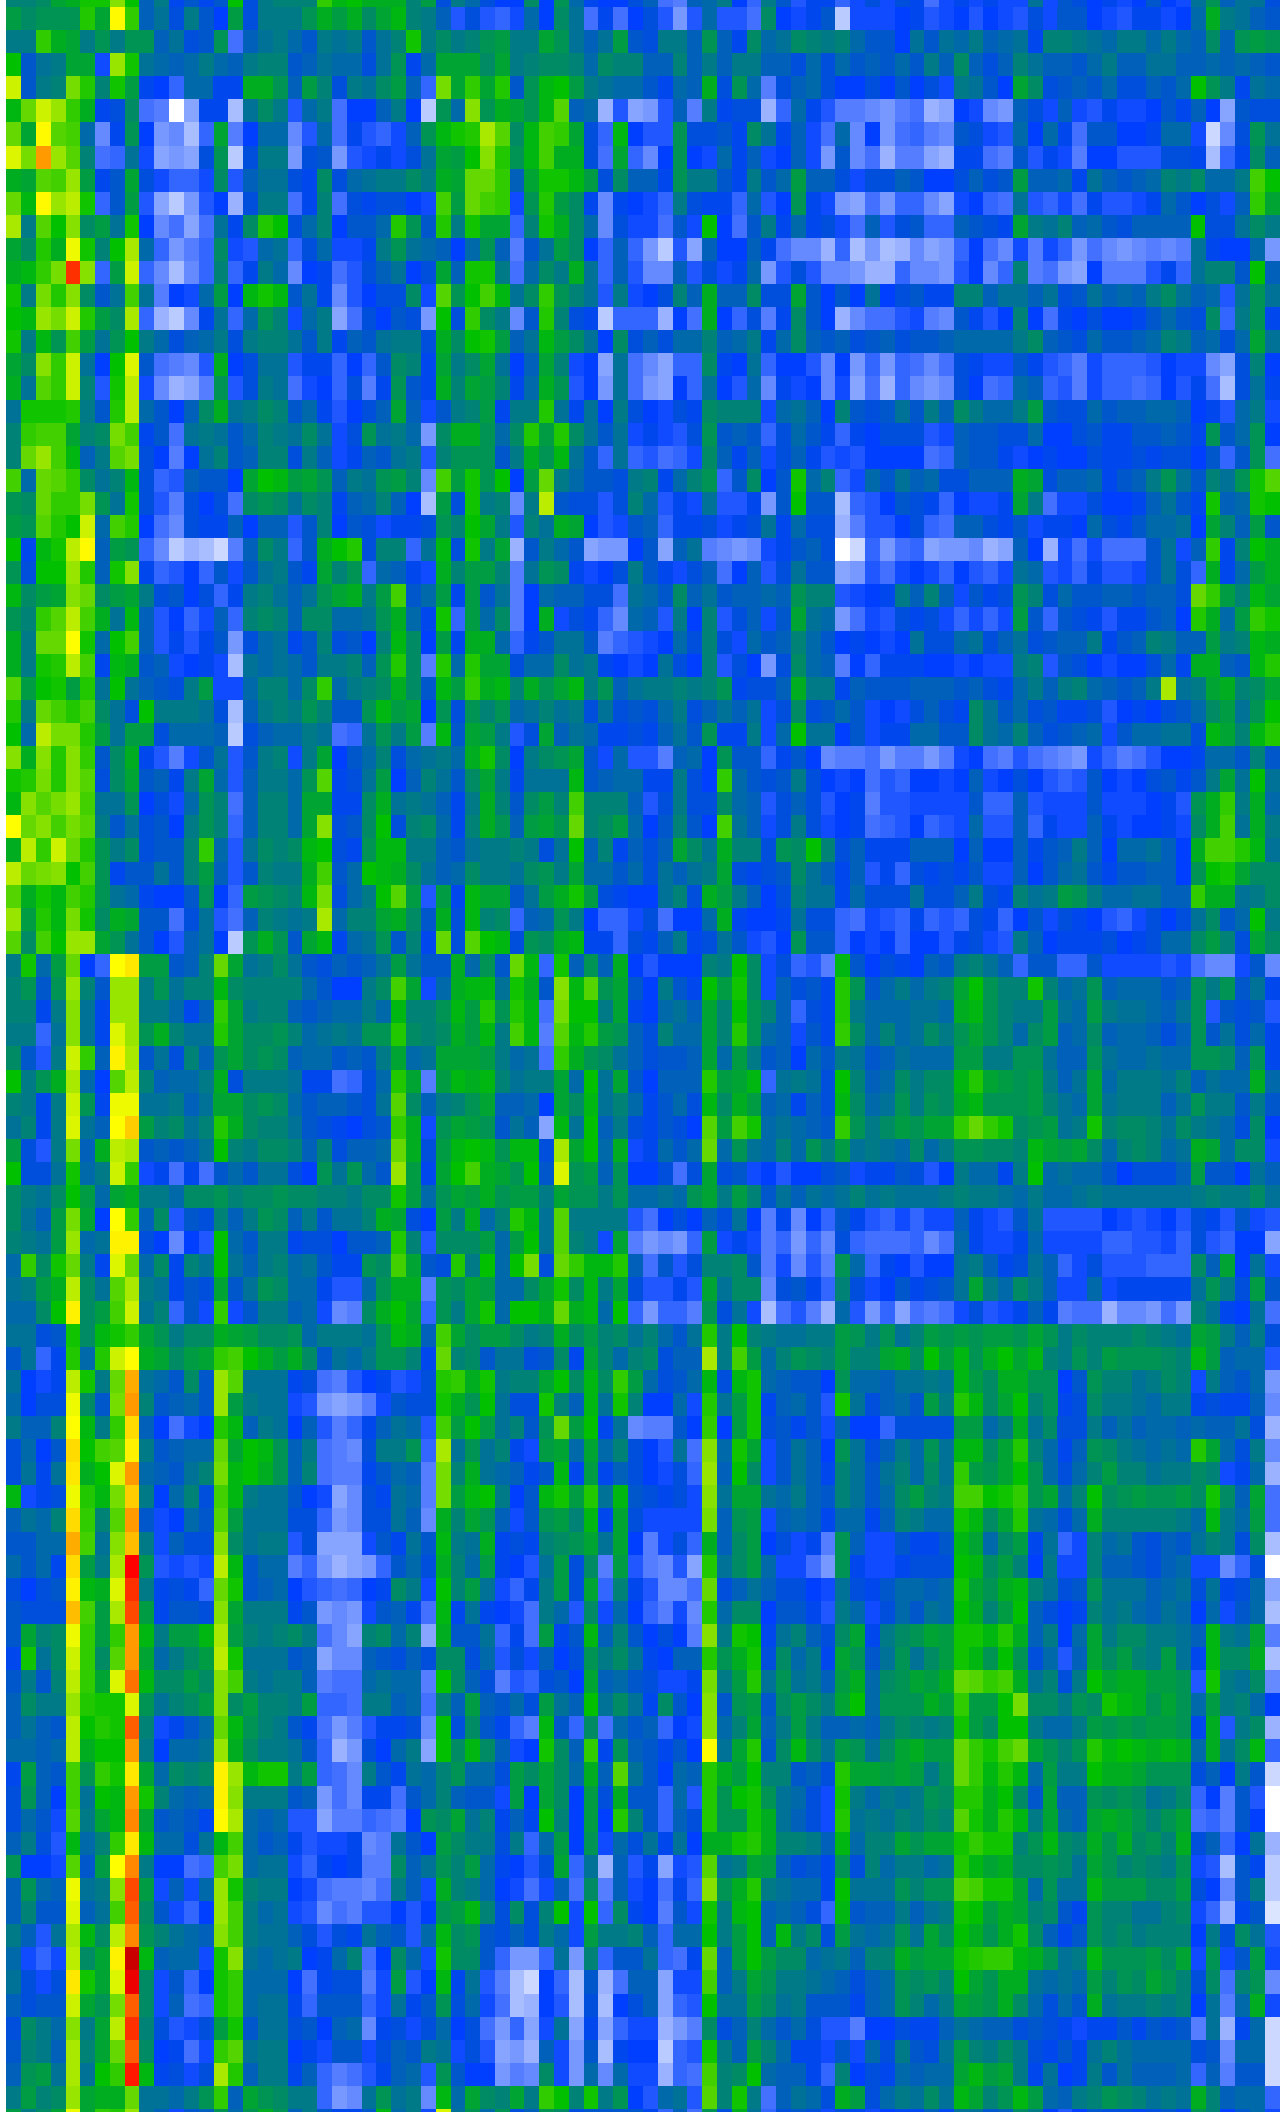

At3g48360  
At2g01410  
At2g36750  
At5g01600  
At4g05050  
At5g60410  
At2g22010  
At2g33540  
At4g04740  
At5g14720  
At1g63900  
At5g41790  
At5g67580  
At4g32060  
At2g15130  
At2g46340  
At2g46340  
At4g32190  
At2g30600  
At2g30600  
At5g12430  
At1g54410  
At2g31810  
At3g56240  
At2g38300  
At2g44670  
At3g05270  
At1g68910  
At1g08250  
At3g45730  
At5g24530  
At4g19660  
At4g17250  
At1g72940  
At1g74450  
At3g44260  
At5g37770  
At1g61260  
At1g67880  
At3g19380  
At1g31350  
At5g52570  
At3g12320  
At3g09600  
At3g09600  
At2g41250  
At5g64170  
At2g46830  
At3g54490  
At2g32450  
At1g18460  
At1g17870  
At5g53970  
At5g47040  
At5g06980  
At3g47500  
At5g06440  
At5g53410  
At1g07450  
At4g37380  
At3g09650  
At4g19500  
At4g22200  
At3g22420  
At1g49180  
At1g19715  
At3g04310  
At3g57990  
At3g11560  
At3g06510  
At1g60260  
At5g56600  
At3g47490  
At2g03710  
At3g10940  
At1g26150  
At5g65685  
At1g09795  
At2g36250  
At5g17840  
At2g35800  
At3g01180  
At1g75210  
At1g73990  
At1g31920  
At2g17340  
At2g31800  
At1g22590  
At5g03650  
At2g21370  
At3g51895

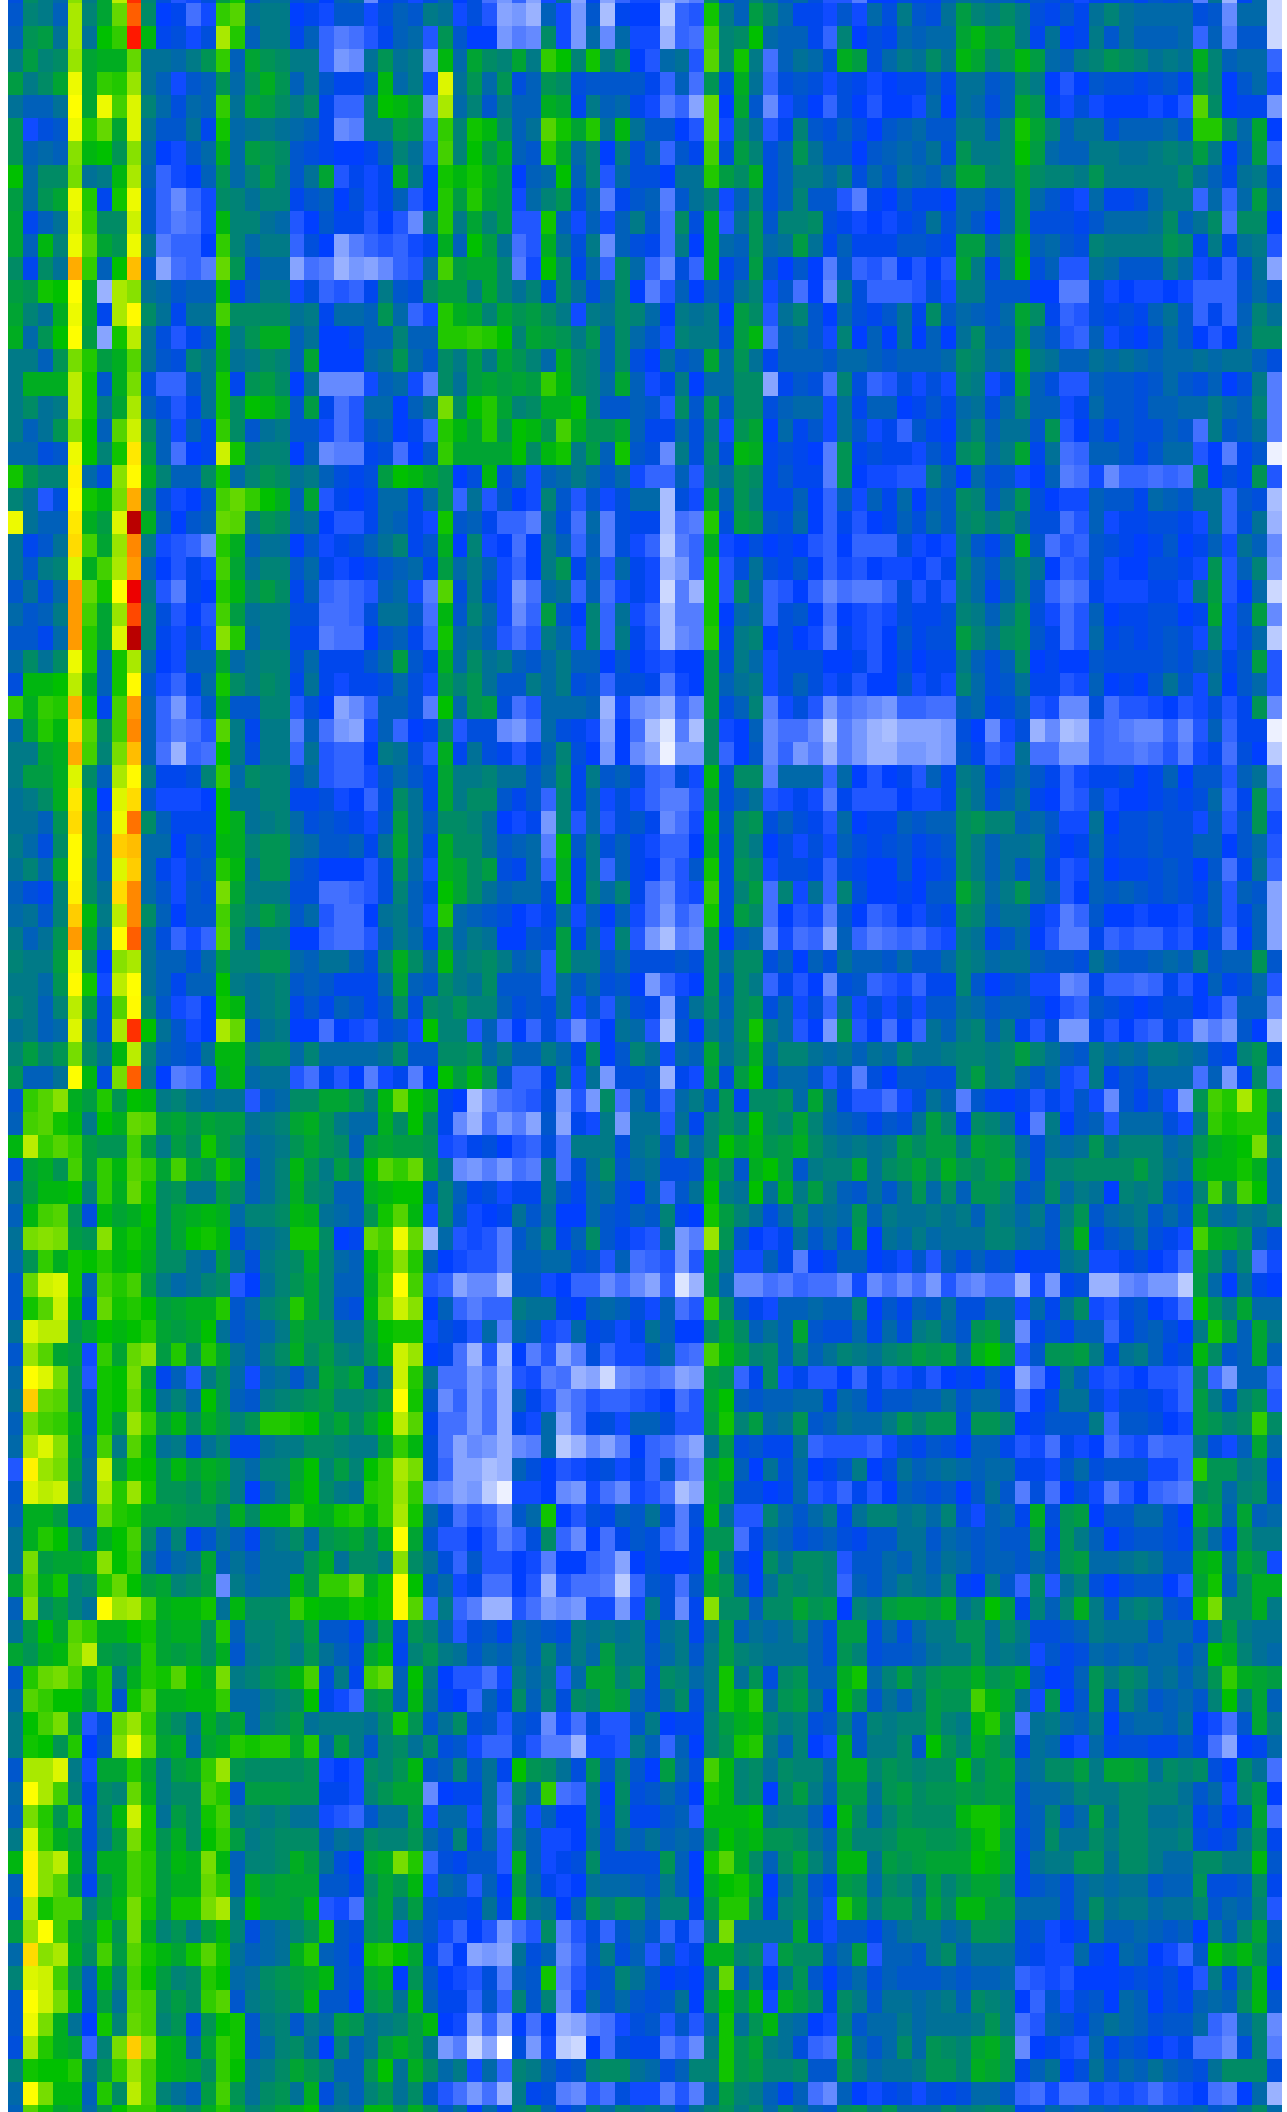

At5g03650  
At2g21370  
At3g51895  
At1g66540  
At1g11410  
At5g53020  
At3g19620  
At3g17330  
At1g29600  
At5g12040  
At1g53350  
At5g03430  
At1g33110  
At5g10490  
At4g03260  
At5g25130  
At5g47650  
At3g30720  
At4g10920  
At1g65410  
At5g20360  
At2g35840  
At3g55630  
At4g37270  
At5g10250  
At5g49970  
At1g73170  
At2g23390  
At3g28270  
At1g62400  
At4g19510  
At3g46530  
At5g22510  
At2g41040  
At2g15020  
At1g73870  
At1g55960  
At2g32560  
At1g66330  
At5g24150  
At5g58870  
At3g24460  
At5g58770  
At5g15440  
At2g22360  
At5g34800  
At1g62850  
At2g32580  
At5g66060  
At5g04480  
At4g00510  
At1g51430  
At2g16630  
At1g07650  
At1g64710  
At4g00370  
At5g41900  
At2g19460  
At5g61570  
At5g03040  
At4g35320  
At5g11790  
At3g23820  
At1g76670  
At5g06700  
At3g05800  
At2g28550  
At5g54380  
At3g13520  
At1g55330  
At2g04450  
At2g18660  
At5g56250  
At2g16660  
At1g28010  
At2g16500  
At3g61150  
At5g61810  
At3g28220  
At4g13410  
At3g44735  
At2g36580  
At4g21940  
At1g53450  
At5g11740  
At4g29610  
At2g38010  
At3g52500  
At4g27520  
At3g25880  
At3g02570

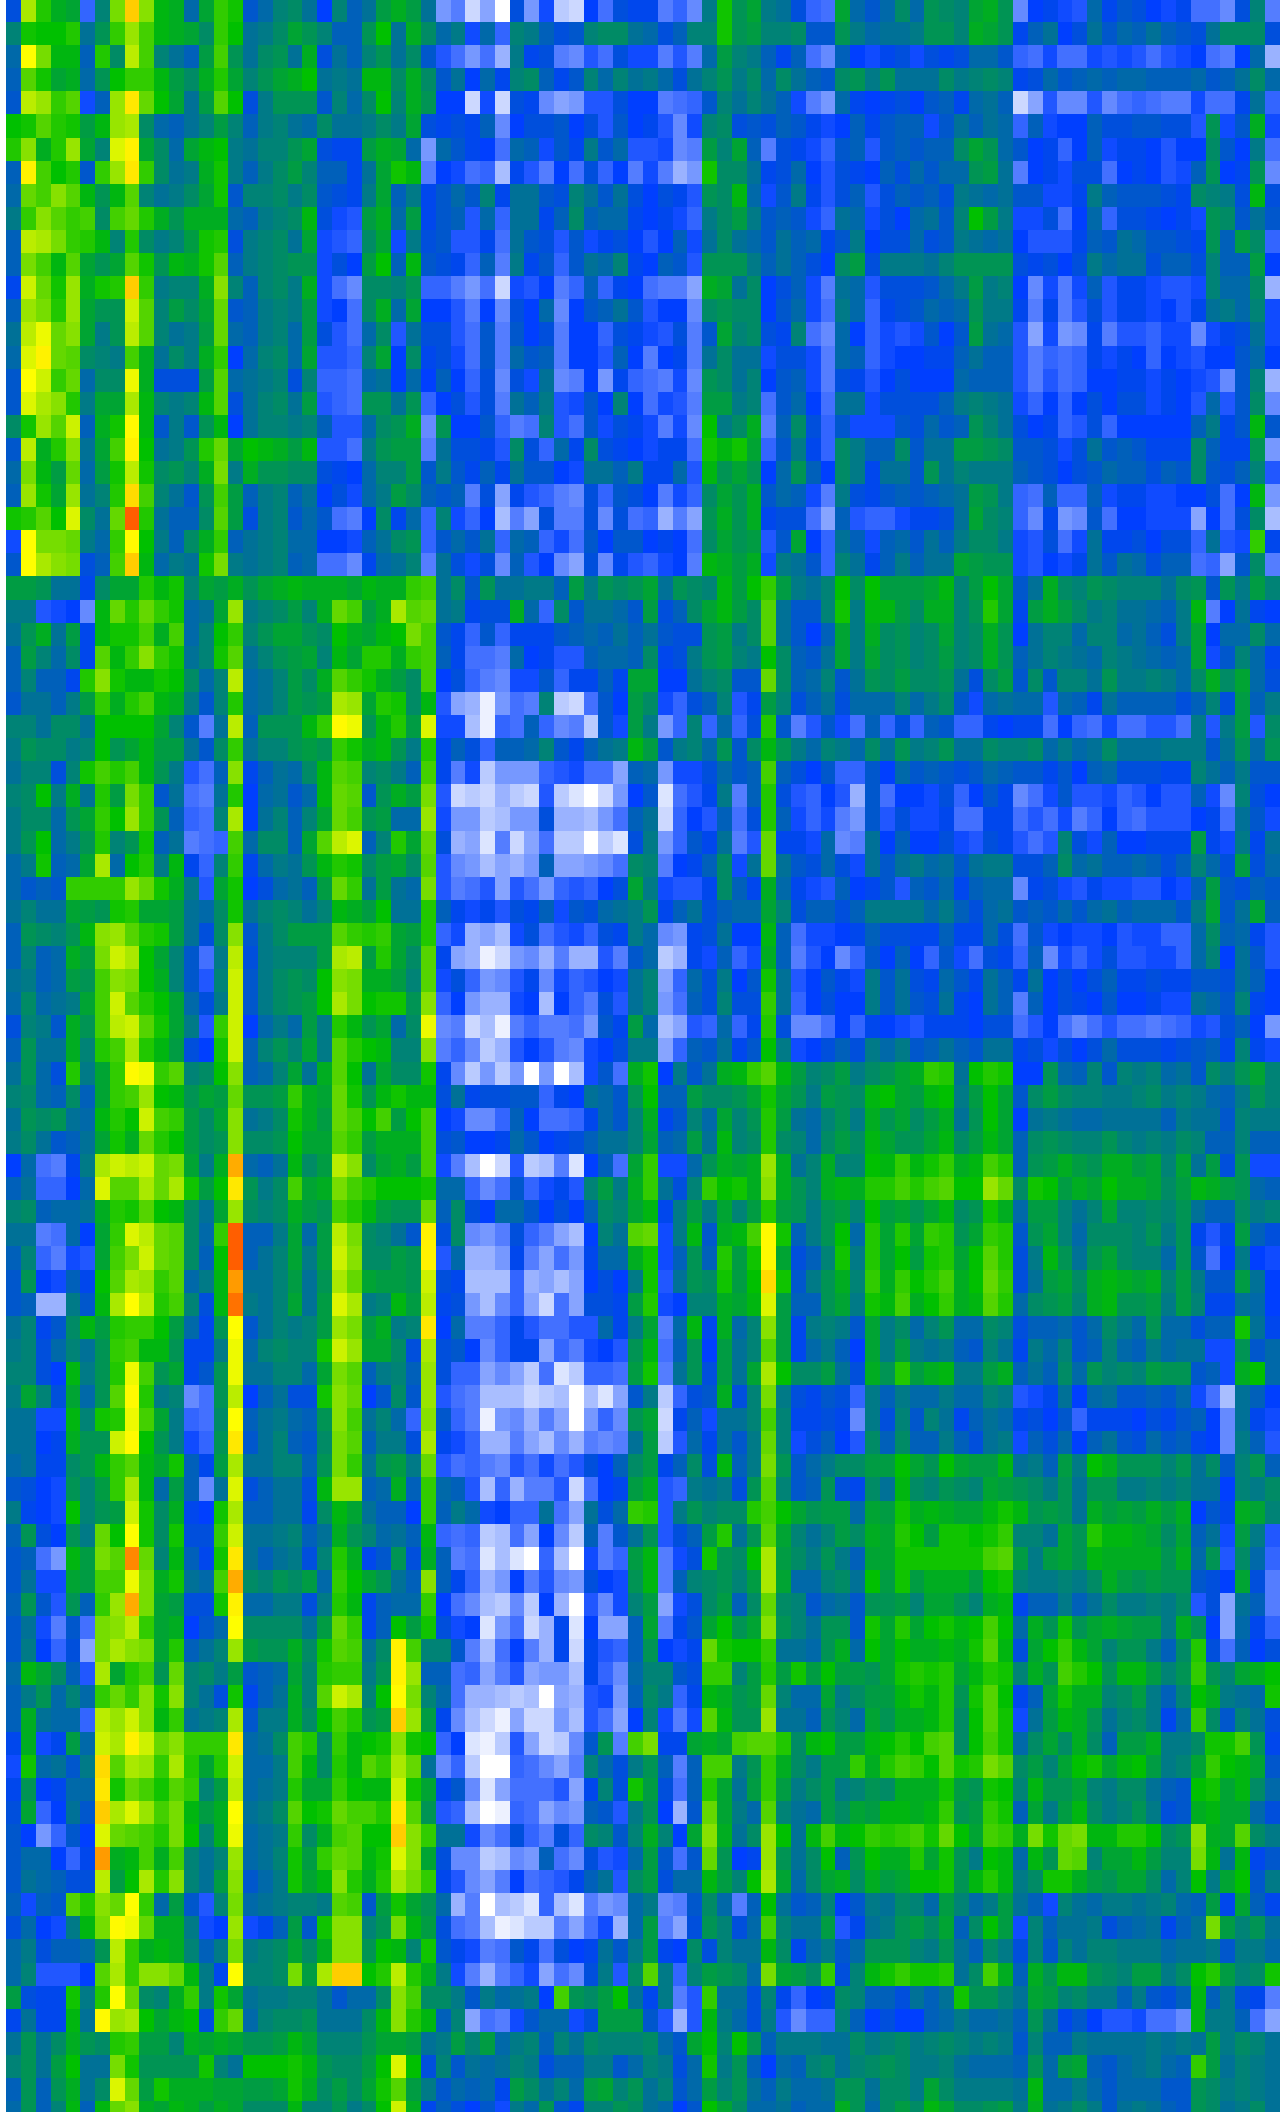

At4g27520  
At3g25880  
At3g02570  
At2g22710  
At2g35390  
At5g12050  
At2g28305  
At2g44230  
At2g30540  
At1g22890  
At5g06870  
At1g52000  
At1g52290  
At5g52320  
At1g17600  
At1g19670  
At5g02940  
At4g03400  
At3g29760  
At1g26560  
At4g01080  
At1g26210  
At1g69550  
At5g40380  
At4g34240  
At4g00650  
At5g15780  
At2g20190  
At3g57720  
At5g14920  
At4g39730  
At3g42050  
At1g33070  
At4g19410  
At1g78900  
At5g62720  
At1g12840  
At3g14310  
At3g01390  
At1g47400  
At5g57770  
At4g37800  
At5g02760  
At1g73830  
At2g41560  
At5g04230  
At3g60440  
At1g43570  
At1g36110  
At3g16960  
At1g42960  
At5g49170  
At2g14930  
At5g63890  
At3g07430  
At2g39080  
At2g31670  
At4g33030  
At4g11460  
At1g54220  
At1g58080  
At4g31990  
At5g65010  
At1g56430  
At3g01120  
At1g31230  
At1g78370  
At3g25530  
At5g57850  
At5g66530  
At1g01090  
At4g33580  
At2g41770  
At5g46790  
At1g12500  
At2g03350  
At2g42320  
At3g05910  
At3g06770  
At2g27060  
At1g20010  
At1g12850  
At1g79870  
At3g17210  
At3g44970  
At5g35740  
At2g43330  
At5g11420  
At3g22090  
At3g21890  
At1g26790  
At4g24650

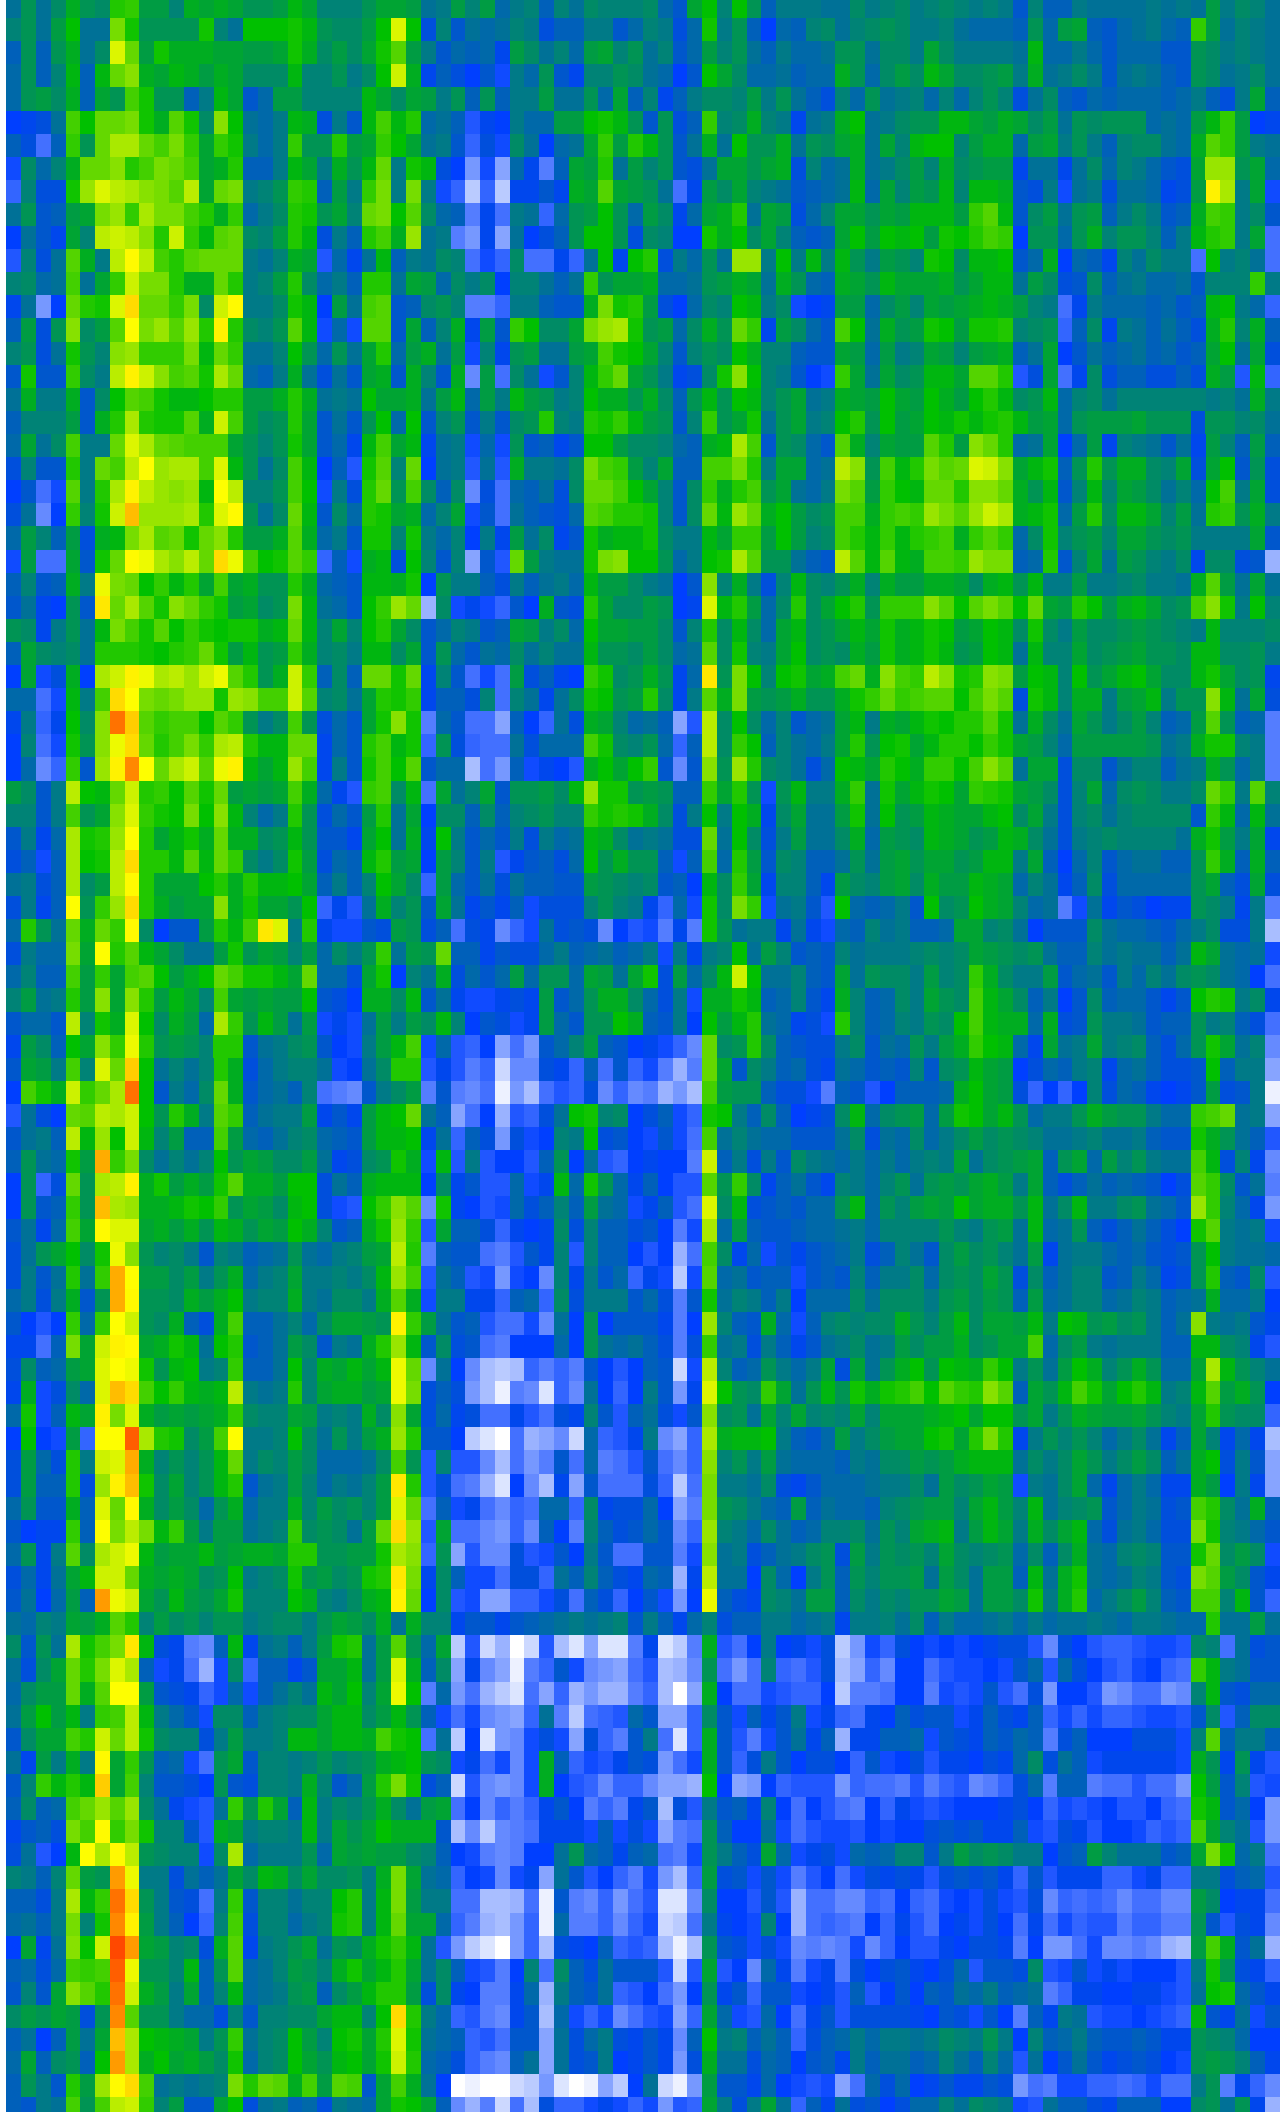

At3g22090  
At3g21890  
At1g26790  
At4g34650  
At3g13240  
At3g28140  
At2g22640  
At1g32310  
At5g10700  
At1g33480  
At4g18230  
At3g23325  
At5g18470  
At4g04880  
At5g55840  
At5g15340  
At1g20816  
At1g63400  
At4g04370  
At1g74810  
At3g61970  
At4g14605  
At3g04450  
At1g71420  
At3g10630  
At5g39860  
At2g18890  
At2g30900  
At3g06100  
At1g05540  
At5g04790  
At3g47295  
At1g74530  
At5g47900  
At3g58090  
At3g05240  
At3g10150  
At4g31040  
At5g09230  
At3g23410  
At3g06150  
At4g00950  
At2g40670  
At3g26960  
At5g45650  
At5g55790  
At5g08330  
At2g24790  
At1g57790  
At1g11440  
At3g02170  
At5g27360  
At3g57800  
At1g29510  
At1g06040  
At1g69160  
At5g36910  
At1g73660  
At2g20040  
At3g26520  
At3g16250  
At2g47440  
At2g10940  
At2g30010  
At2g16280  
At4g27430  
At5g59350  
At1g31300  
At5g57780  
At1g66150  
At5g04150  
At4g29220  
At3g26030  
At3g53420  
At5g44530  
At5g16940  
At1g23080  
At3g04910  
At5g42680  
At3g01910  
At4g37300  
At3g17510  
At2g30520  
At2g30520  
At3g06750  
At3g23880  
At3g29240  
At3g14770  
At5g47610  
At3g50560  
At4g34720  
At2g45630

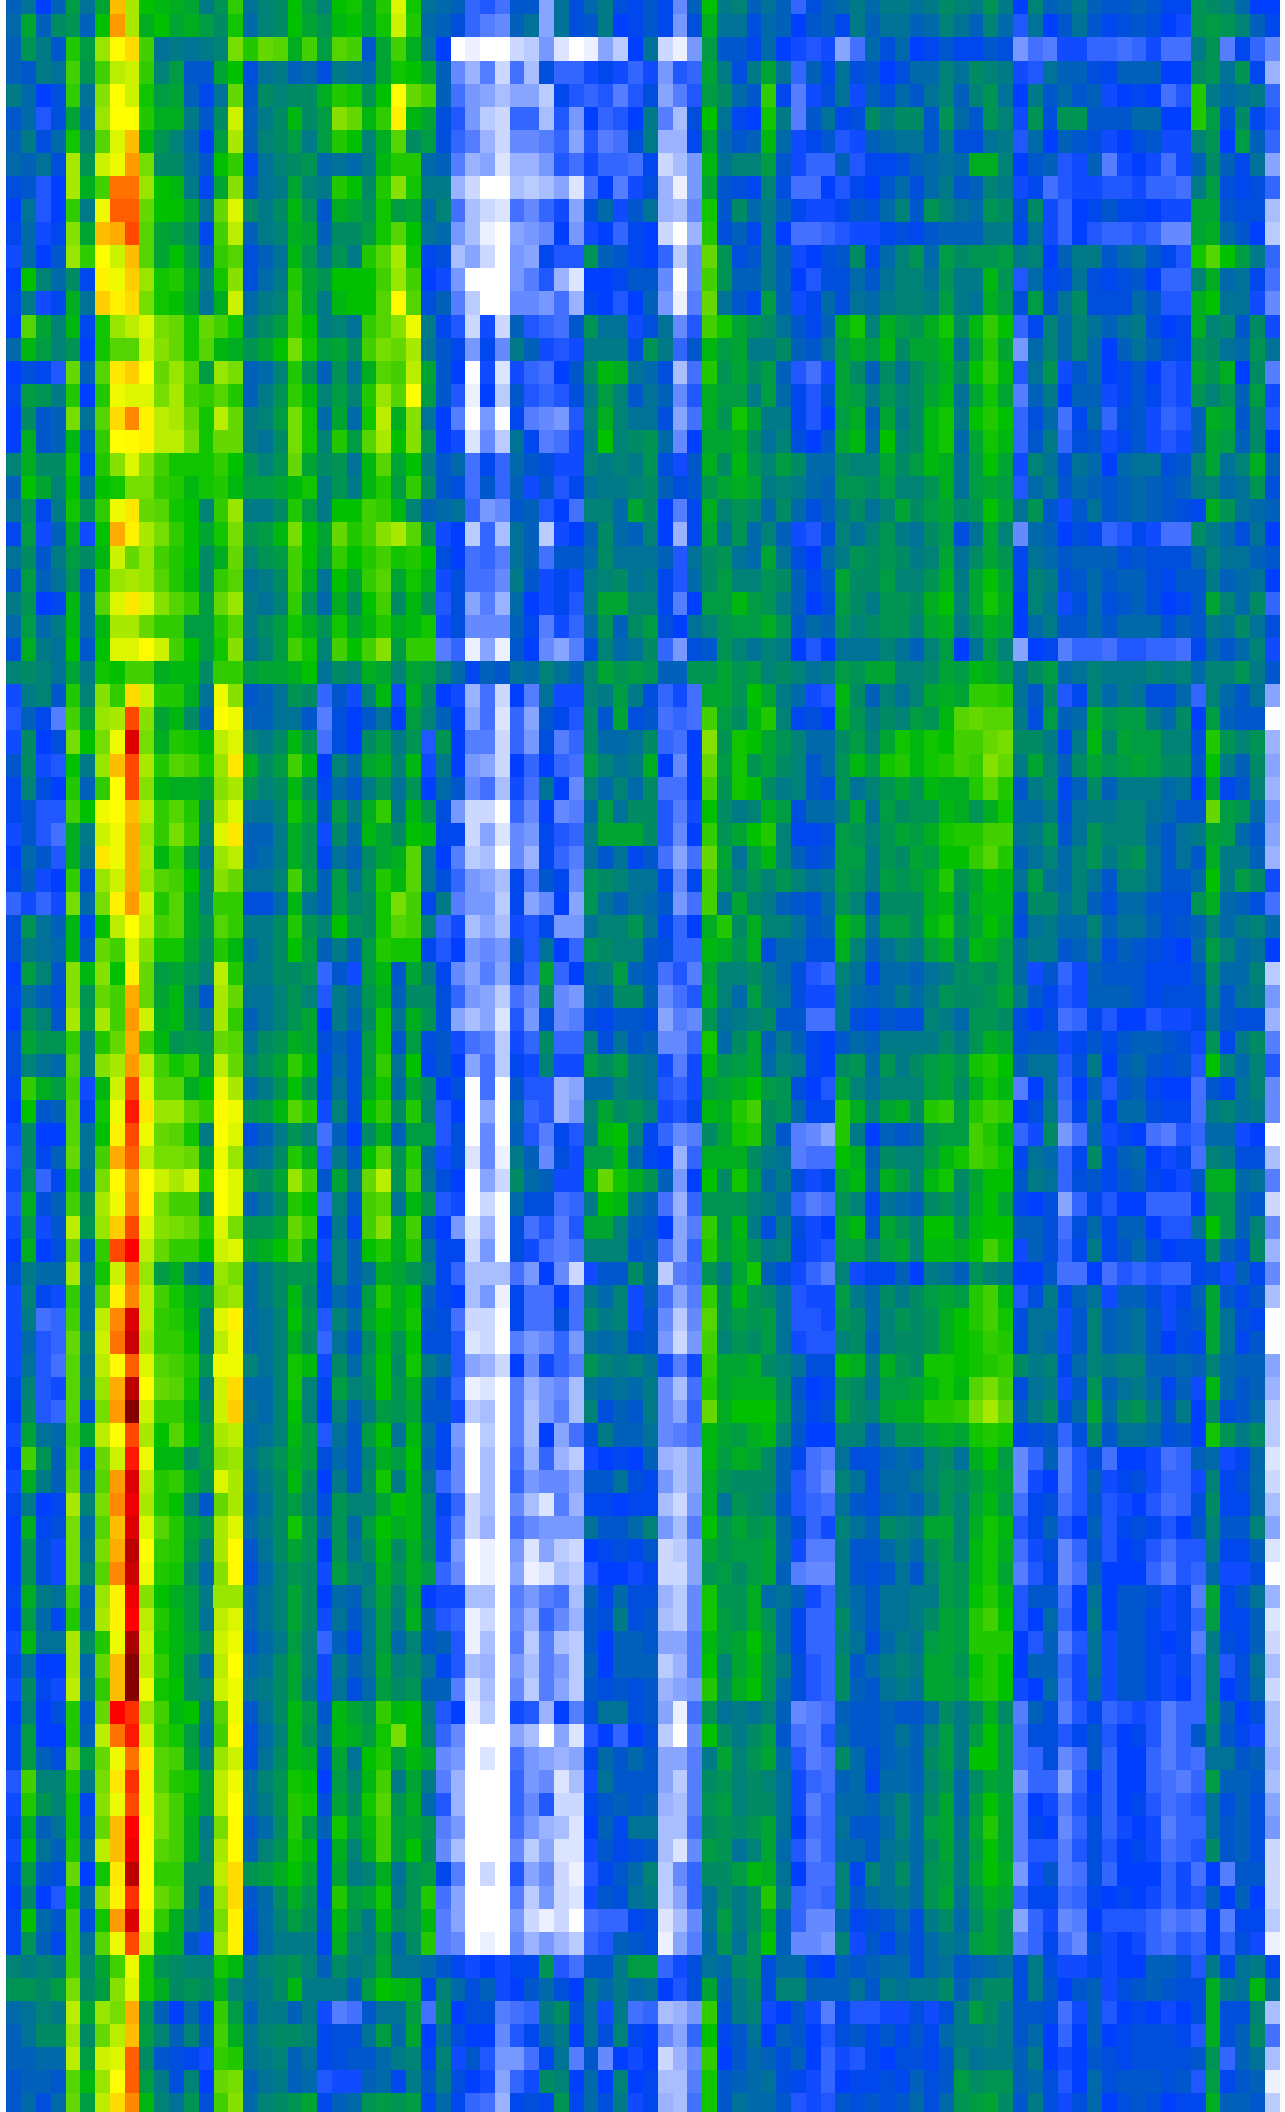

At5g47810  
At3g50560  
At4g34720  
At2g45630  
At1g70940  
At1g14700  
At3g46490  
At2g01420  
At5g23920  
At5g41050  
At4g36540  
At5g42030  
At1g12090  
At3g16370  
At4g33180  
At2g06260  
At3g22104  
At2g20050  
At5g06790  
At5g28560  
At5g67050  
At2g31780  
At4g16980  
At5g55380  
At5g52140  
At5g22590  
At3g20540  
At5g43120  
At3g27840  
At3g19880  
At1g30210  
At3g32930  
At2g35450  
At1g25290  
At1g26600  
At1g65420  
At4g31040  
At3g18050  
At3g17640  
At4g29120  
At5g11590  
At5g01790  
At5g17520  
At1g03310  
At1g53230  
At4g16870  
At2g30420  
At3g53170  
At5g63040  
At4g13220  
At5g60970  
At3g21580  
At3g52155  
At5g19500  
At1g64430  
At4g14240  
At2g20875  
At1g64355  
At3g20680  
At5g48910  
At1g49975  
At5g52100  
At2g35450  
At4g20760  
At1g72640  
At4g38840  
At4g05090  
At2g28605  
At4g16410  
At1g21500  
At3g08920  
At3g45050  
At1g55370  
At3g12685  
At4g17810  
At4g16980  
At2g41940  
At4g22830  
At3g59870  
At1g34310  
At2g48070  
At5g12130  
At5g55710  
At4g24930  
At3g55250  
At2g34290  
At3g30570  
At3g23080  
At2g32100  
At1g18620  
At5g24500  
At1g68190

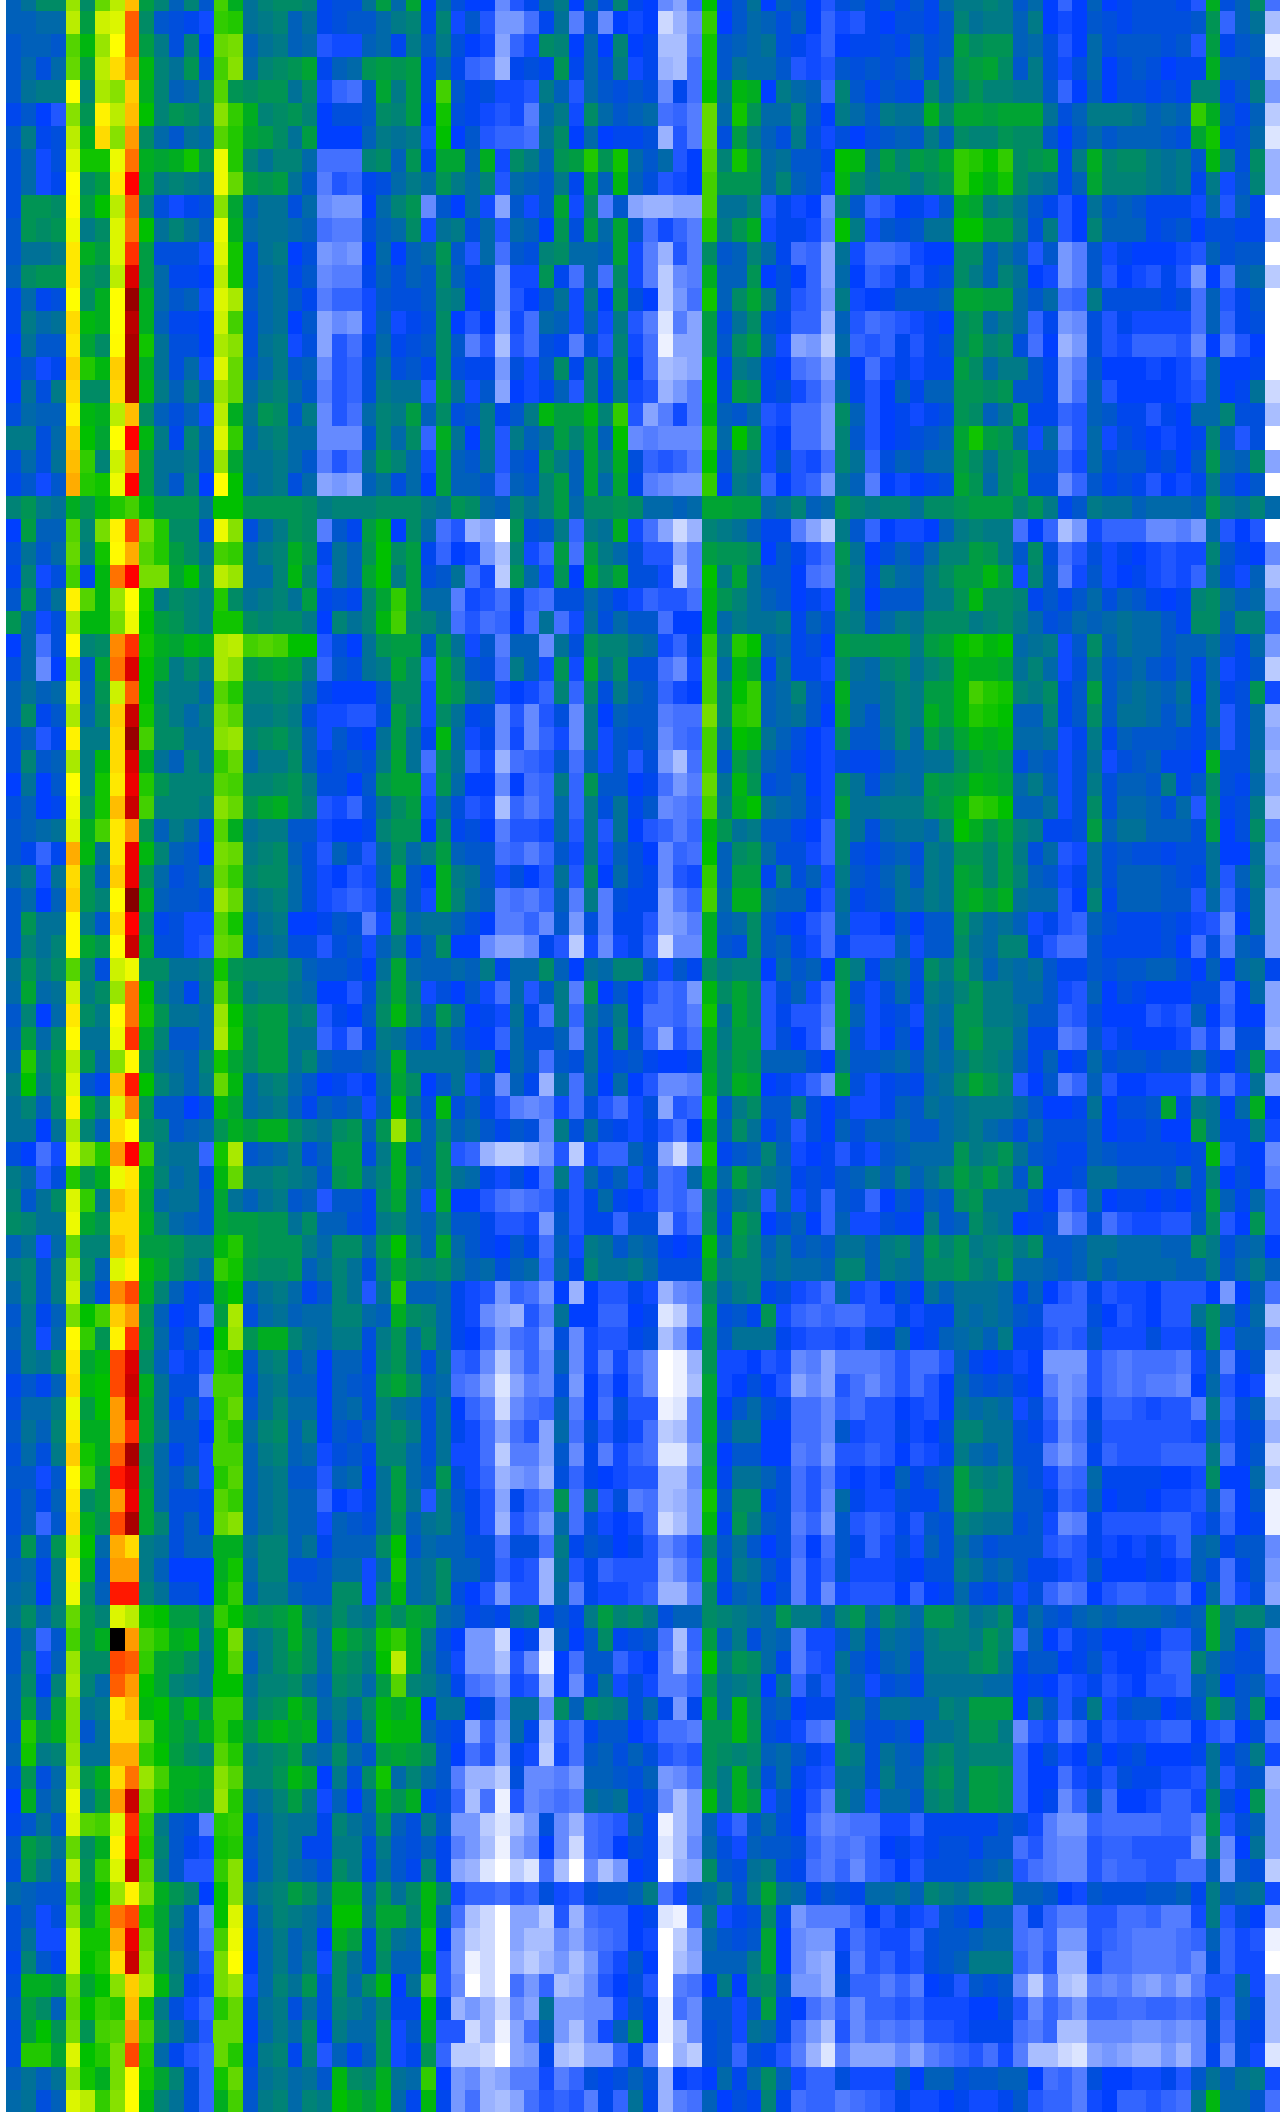

At2g02180  
At1g18620  
At5g24500  
At1g68190  
At5g43870  
At1g15260  
At5g44680  
At2g46250  
At2g38780  
At5g24930  
At1g04530  
At2g03390  
At4g02260  
At3g20930  
At2g03390  
At3g10970  
At3g02690  
At3g29290  
At4g33630  
At4g32320  
At3g05340  
At5g25630  
At3g32130  
At3g51510  
At5g55620  
At1g22430  
At5g06530  
At5g65990  
At1g62960  
At5g26820  
At1g13650  
At5g51720  
At5g02830  
At1g33811  
At1g03440  
At1g76110  
At1g18810  
At1g66840  
At5g20220  
At5g56850  
At2g26080  
At5g10470  
At1g02820  
At4g39800  
At4g26850  
At1g70610  
At3g15310  
At1g07180  
At1g17360  
At2g24540  
At5g24165  
At4g33660  
At1g73650  
At2g48020  
At5g42760  
At2g27420  
At1g17050  
At1g74910  
At3g52720  
At1g16720  
At3g10220  
At2g29290  
At1g75100  
At5g13780  
At2g33250  
At1g66130  
At1g42550  
At5g15850  
At1g64500  
At4g27030  
At5g55570  
At3g21870  
At4g00050  
At3g56290  
At4g19820  
At2g36630  
At1g65870  
At3g20270  
At1g03055  
At5g20935  
At2g36145  
At1g56190  
At2g45350  
At2g21210  
At2g47910  
At1g04640  
At1g50170  
At3g63160  
At3g10520  
At4g21210  
At4g16370  
At1g77990

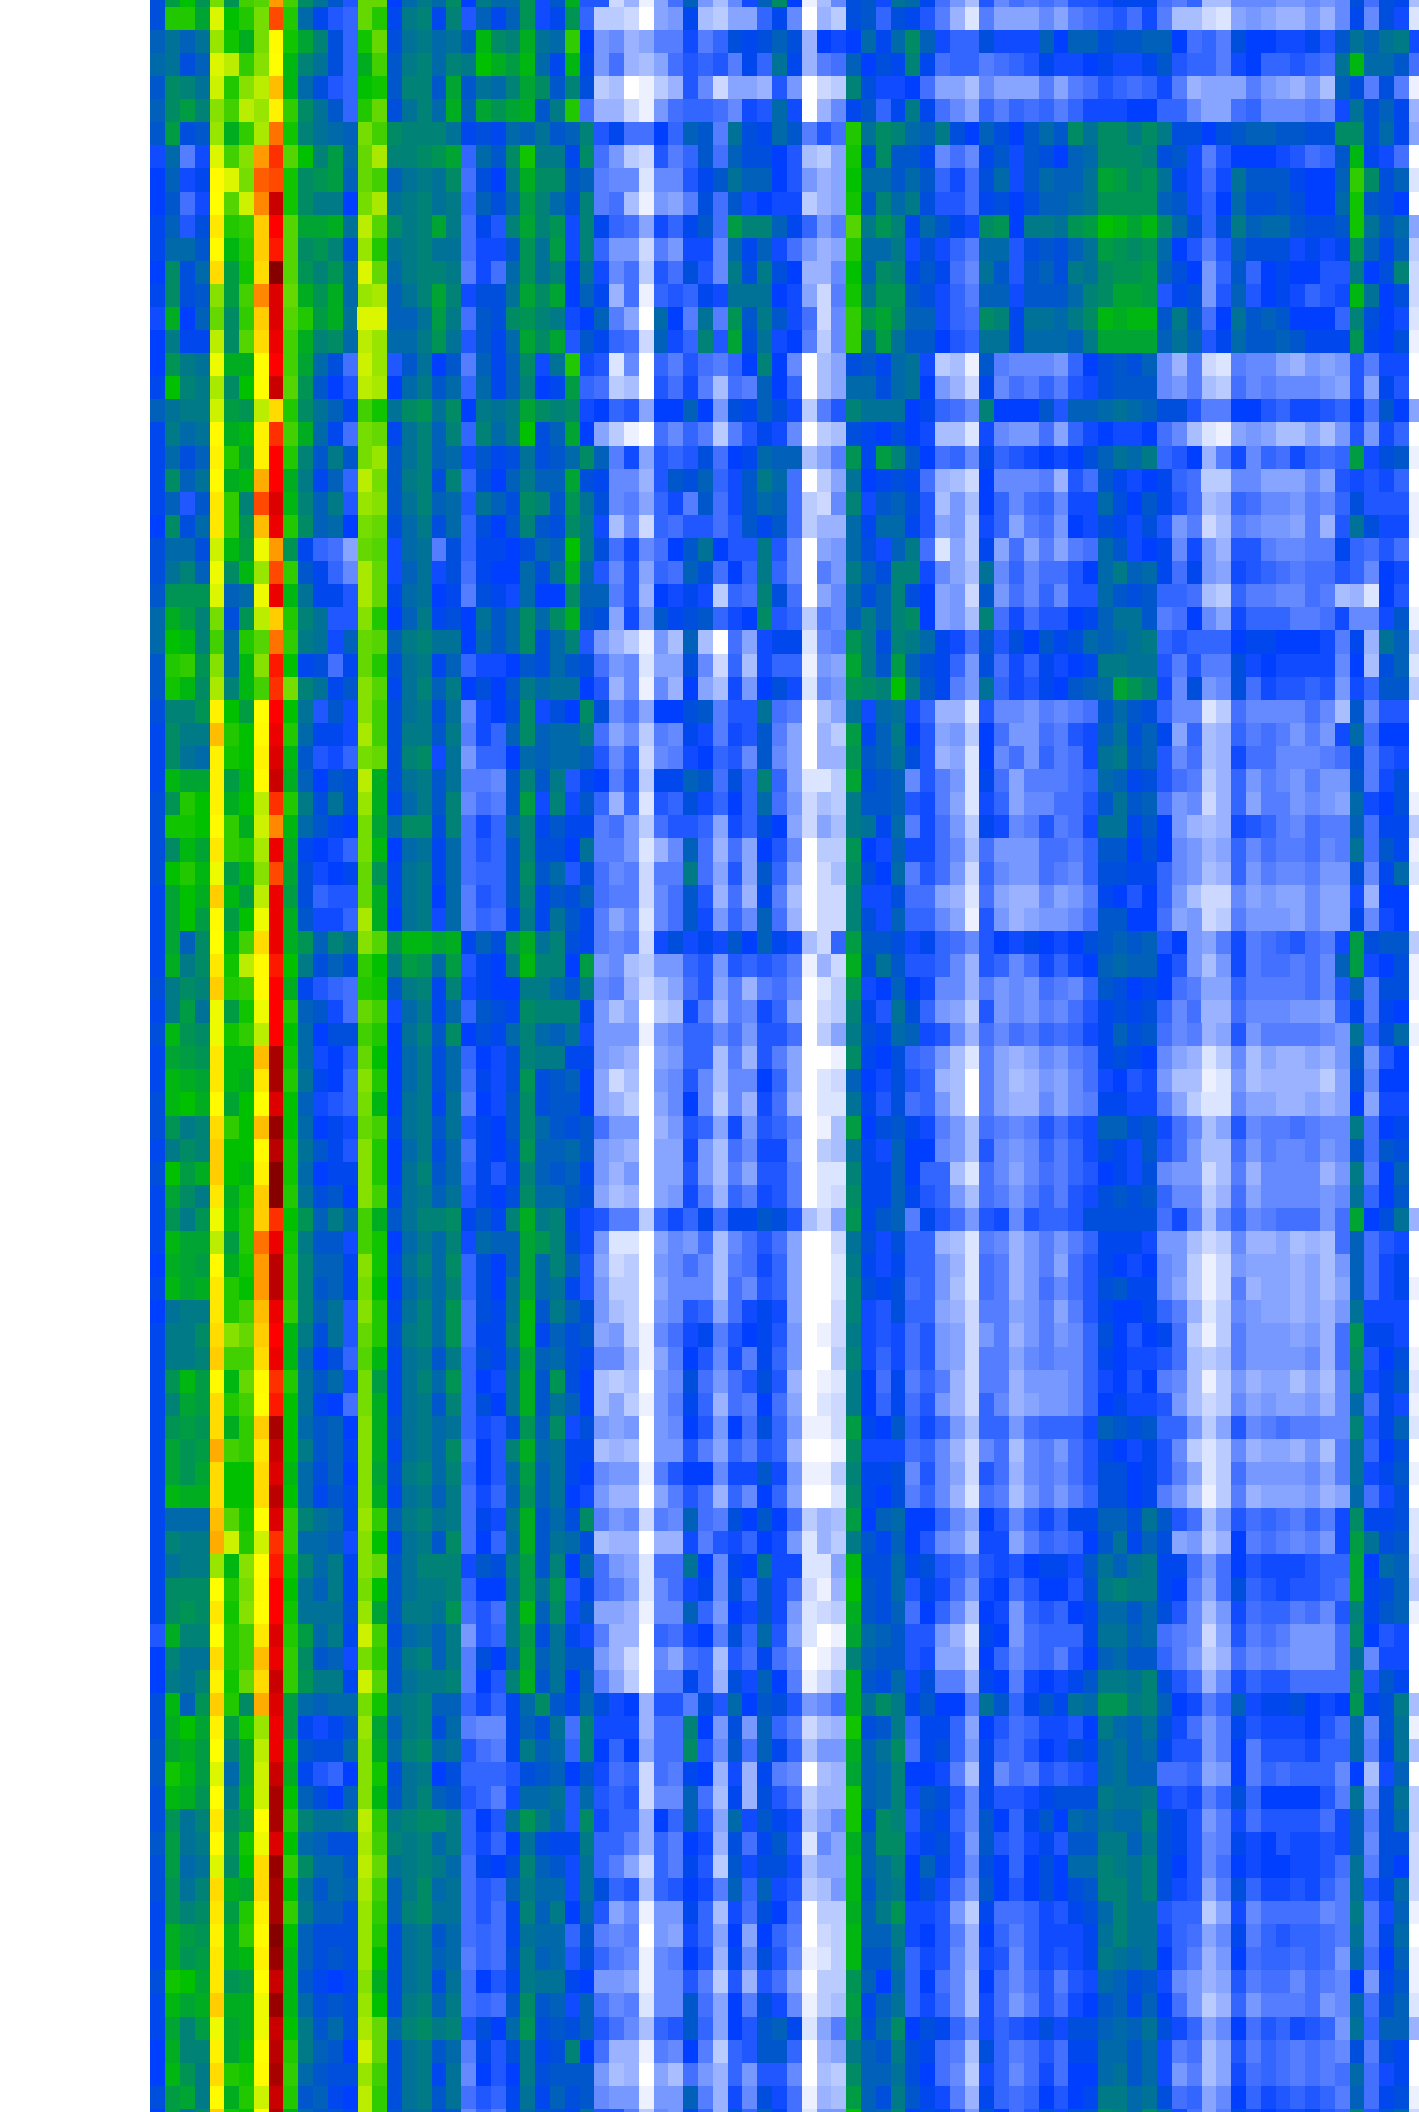

At4g21210  
At4g16370  
At1g77990  
At2g38170  
At3g19850  
At2g40100  
At3g15900  
At4g25910  
At4g14540  
At1g72030  
At3g11090  
At1g54350  
At1g05385  
At4g34620  
At4g40045  
At1g36320  
At2g27680  
At3g11670  
At2g24830  
At3g11750  
At1g07110  
At3g47430  
At2g36835  
At5g04440  
At5g03900  
At3g19170  
At4g25450  
At3g01510  
At1g51110  
At3g14210  
At1g27385  
At3g26085  
At1g48450  
At3g61080  
At2g37920  
At1g07700  
At1g32070  
At5g37360  
At5g60600  
At2g01110  
At4g19830  
At1g10360  
At4g30993  
At3g14650  
At4g19530  
At2g13360  
At5g38660  
At2g30960  
At1g74880  
At2g32480  
At1g18730  
At1g14150  
At3g11110  
At1g33990  
At1g64680  
At1g23310  
At3g51420  
At3g19800  
At4g23890  
At1g75460  
At3g27925  
At1g65230  
At3g25690  
At1g29700  
At5g09660  
At3g01660  
At5g38980  
At2g29310  
At1g51400  
At1g67840  
At2g47400  
At4g37200  
At1g32160  
At4g26860  
At5g35170  
At1g69523  
At1g52510  
At1g51110  
At1g71810  
At5g63060  
At4g29590  
At5g46390  
At2g29360  
At5g48790  
At4g22890  
At4g33010  
At1g56500  
At5g22620  
At1g31190  
At4g10300  
At4g33470

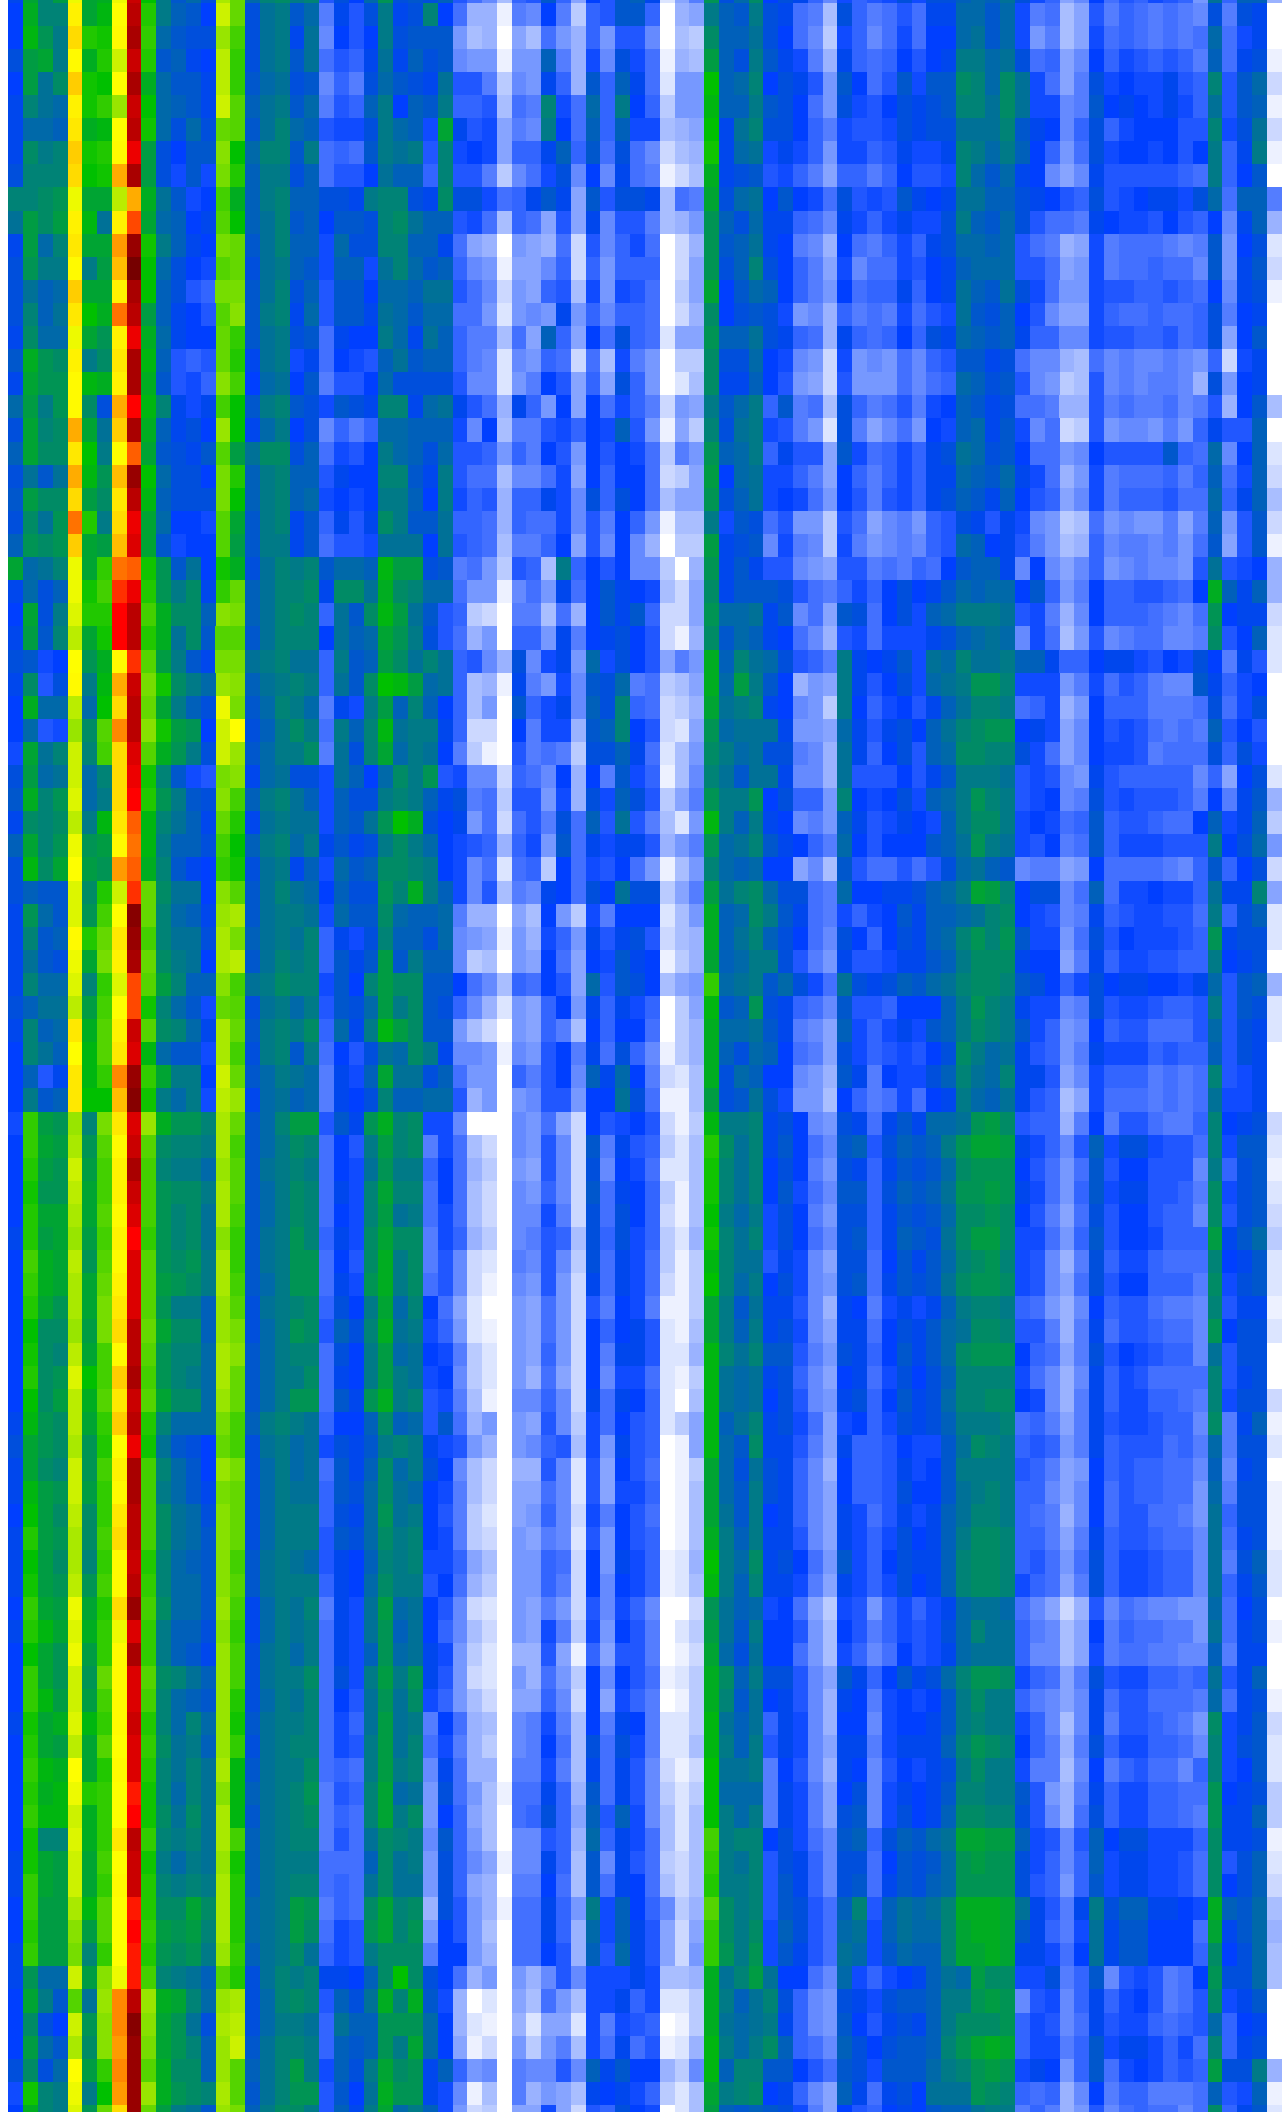

At1g31190  
At4g10300  
At4g33470  
At5g45170  
At4g33500  
At5g13730  
At3g17470  
At1g12250  
At1g05900  
At2g19650  
At2g04039  
At3g19490  
At3g48200  
At5g59750  
At4g18810  
At5g42270  
At1g65260  
At5g19850  
At5g13650  
At2g37240  
At4g09350  
At4g12830  
At5g67370  
At1g50250  
At4g33666  
At2g04790  
At2g05620  
At4g18740  
At3g21760  
At3g04870  
At1g77090  
At3g08010  
At4g14210  
At3g54660  
At3g01060  
At5g44190  
At5g22390  
At4g34350  
At1g50280  
At3g16250  
At3g22210  
At3g09050  
At3g26310  
At3g16520  
At5g58140  
At5g01920  
At1g05140  
At5g53580  
At1g72610  
At1g31330  
At1g06680  
At2g06510  
At1g08380  
At3g47470  
At1g55670  
At4g12800  
At3g16130  
At3g21055  
At4g01150  
At2g26500  
At2g30570  
At4g32590  
At3g08940  
At1g54790  
At4g02770  
At1g67740  
At5g64040  
At1g15820  
At1g52230  
At4g03280  
At4g05180  
At4g04640  
At5g46110  
At5g66570  
At4g28750  
At5g01530  
At2g39730  
At1g79040  
At1g61520  
At3g26650  
At1g30380  
At1g20340  
At4g10340  
At3g54890  
At5g54280  
At1g29660  
At5g53490  
At1g54500  
At2g44920  
At1g50730  
At1g64770  
At1g22270



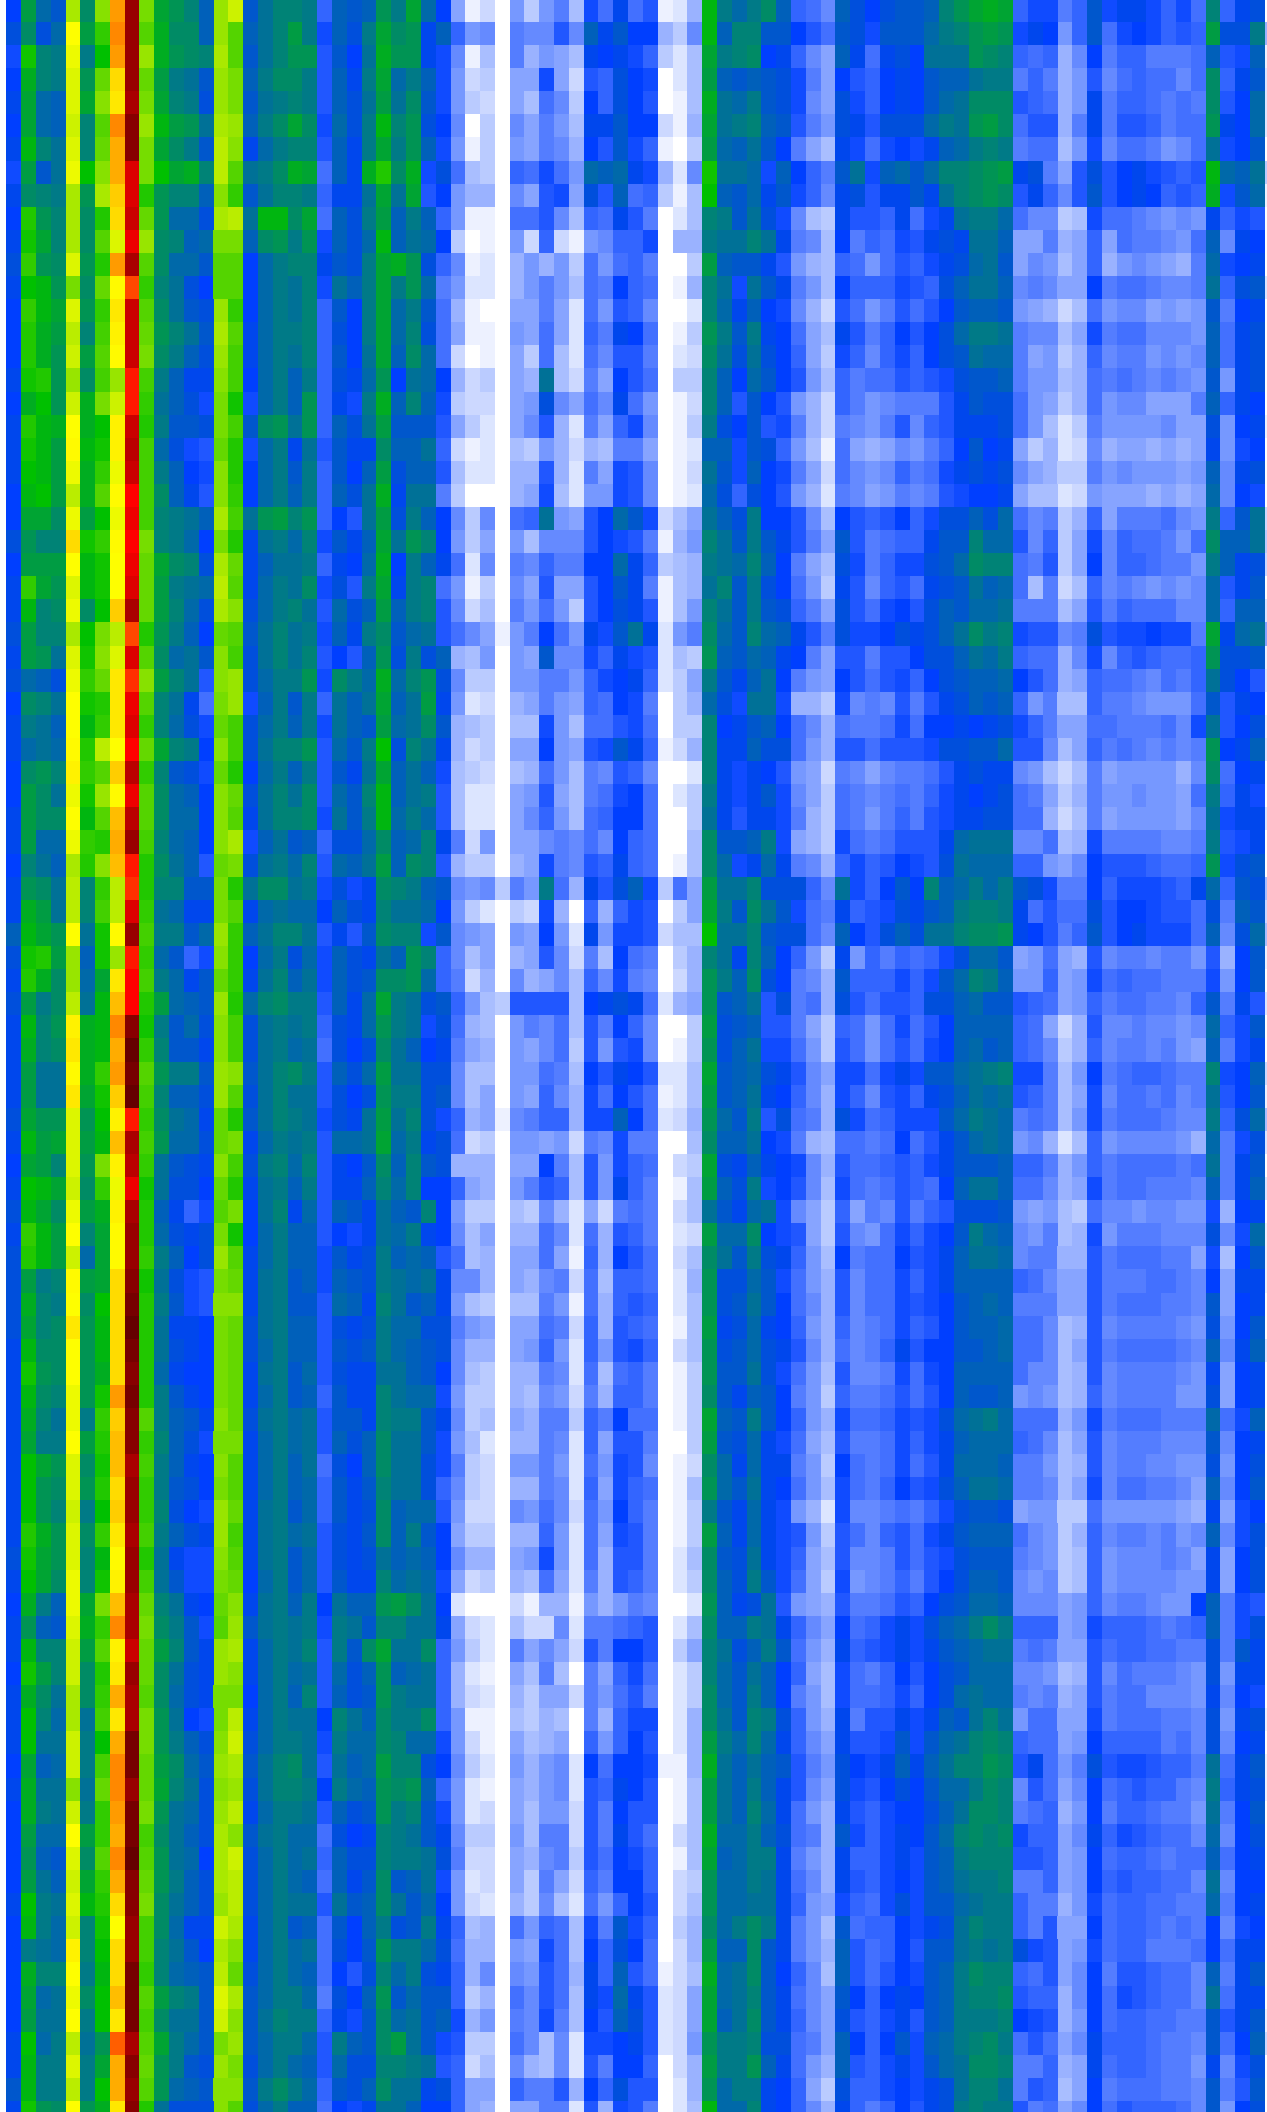

At2g44920  
At1g50730  
At1g64770  
At4g39970  
At3g50685  
At2g01590  
At1g20810  
At3g53470  
At5g16400  
At5g61410  
At3g44620  
At5g14740  
At5g19940  
At4g32260  
At2g46820  
At5g66190  
At1g20020  
At4g31530  
At4g37930  
At1g50320  
At3g02730  
At3g15360  
At4g17350  
At2g42690  
At1g06510  
At3g55040  
At5g20140  
At1g79790  
At1g73655  
At5g52780  
At4g35760  
At1g27480  
At2g01870  
At4g28030  
At1g18170  
At1g70760  
At3g26900  
At1g35420  
At2g35960  
At3g60750  
At1g01790  
At3g46780  
At1g22850  
At1g06690  
At1g68010  
At3g47070  
At2g39470  
At5g58260  
At5g57345  
At1g76080  
At5g27290  
At1g03130  
At1g56500  
At3g01500  
At5g19220  
At5g04140  
At5g43750  
At1g15980  
At3g48420  
At1g42970  
At5g23120  
At1g19150  
At1g32060  
At2g21960  
At3g50820  
At5g07020  
At3g10060  
At3g63140  
At3g54050  
At1g16880  
At1g26220  
At5g13410  
At3g12780  
At1g71500  
At4g09650  
At3g55800  
At5g38520  
At1g75690  
At1g67700  
At1g45474  
At3g23700  
At2g34860  
At2g35370  
At1g73060  
At5g42310  
At5g08650  
At5g27560  
At1g49380  
At2g34460  
At2g21330  
At2g46910  
At1g28970

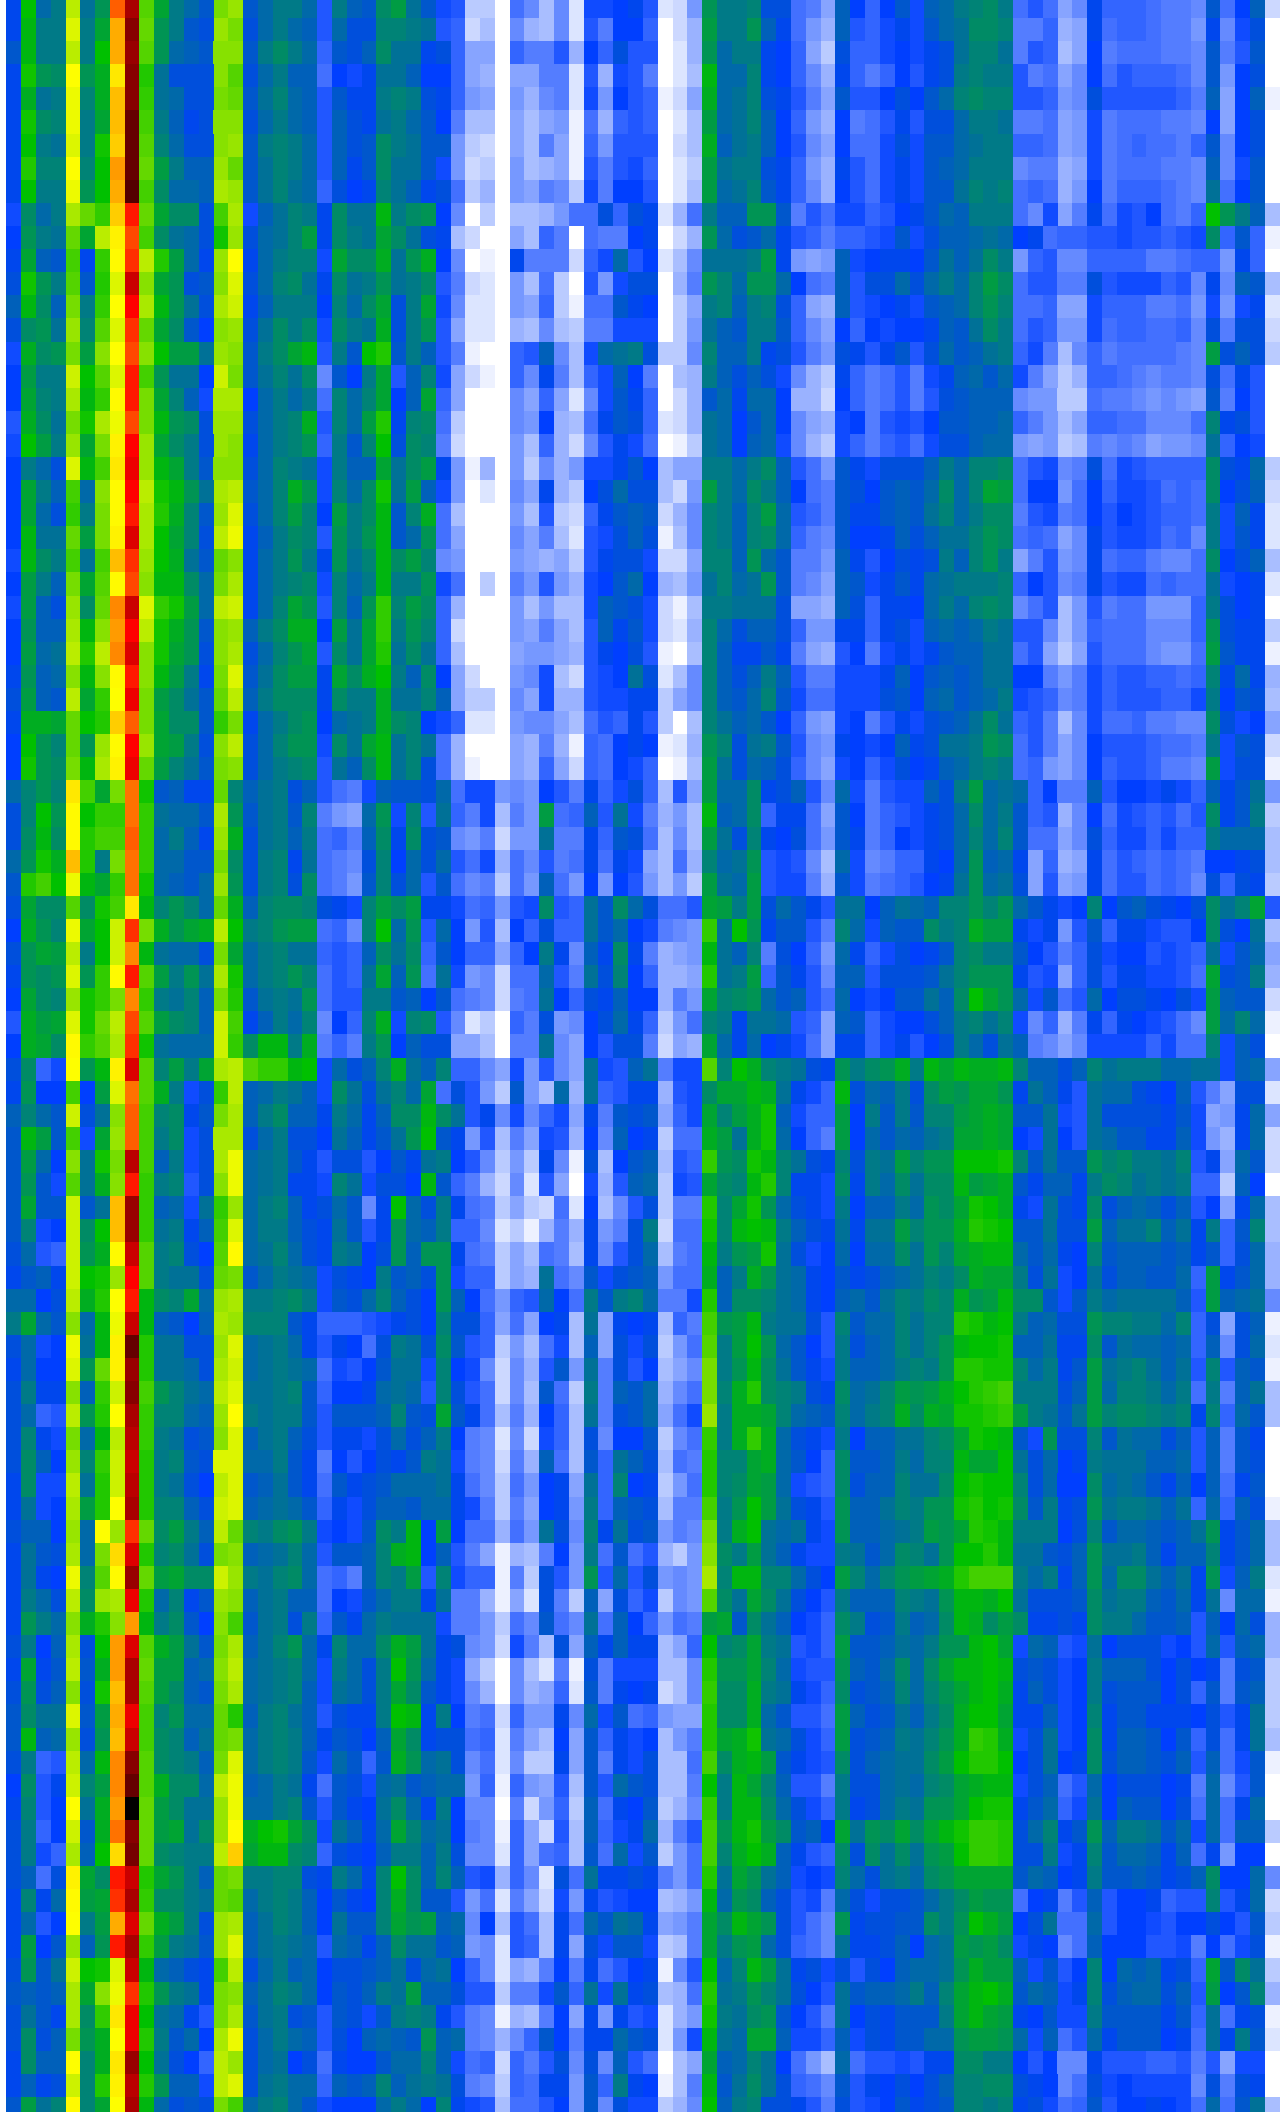

At2g34460  
At2g21330  
At2g46910  
At4g38970  
At1g18060  
At1g09340  
At1g32080  
At1g55480  
At1g76450  
At4g08280  
At3g15690  
At1g10830  
At3g18890  
At3g05350  
At3g50270  
At3g46630  
At2g35490  
At1g63970  
At4g03520  
At1g03680  
At1g66820  
At5g36120  
At3g15110  
At5g16710  
At3g54900  
At2g26580  
At3g56010  
At3g44020  
At2g26340  
At2g21530  
At3g01440  
At3g51600  
At1g52220  
At2g20260  
At2g33530  
At1g66980  
At1g49750  
At1g69720  
At1g31580  
At5g07690  
At3g24140  
At2g29650  
At5g40500  
At2g02450  
At1g69390  
At1g76730  
At3g02830  
At2g43710  
At1g01320  
At2g39190  
At3g52750  
At5g48300  
At5g46800  
At5g64460  
At5g09820  
At5g39210  
At1g18485  
At3g50790  
At1g74070  
At5g35790  
At3g16000  
At4g13670  
At5g28500  
At5g39830  
At5g62790  
At3g43540  
At1g54820  
At4g15560  
At2g38330  
At5g22830  
At2g42600  
At1g44446  
At3g26570  
At5g13630  
At4g04850  
At1g58290  
At1g60550  
At5g28750  
At4g34090  
At1g44000  
At4g27600  
At4g24700  
At3g27050  
At5g56860  
At3g15850  
At3g47550  
At5g16030  
At2g47450  
At5g66055  
At4g01800  
At1g23400  
At3g59780

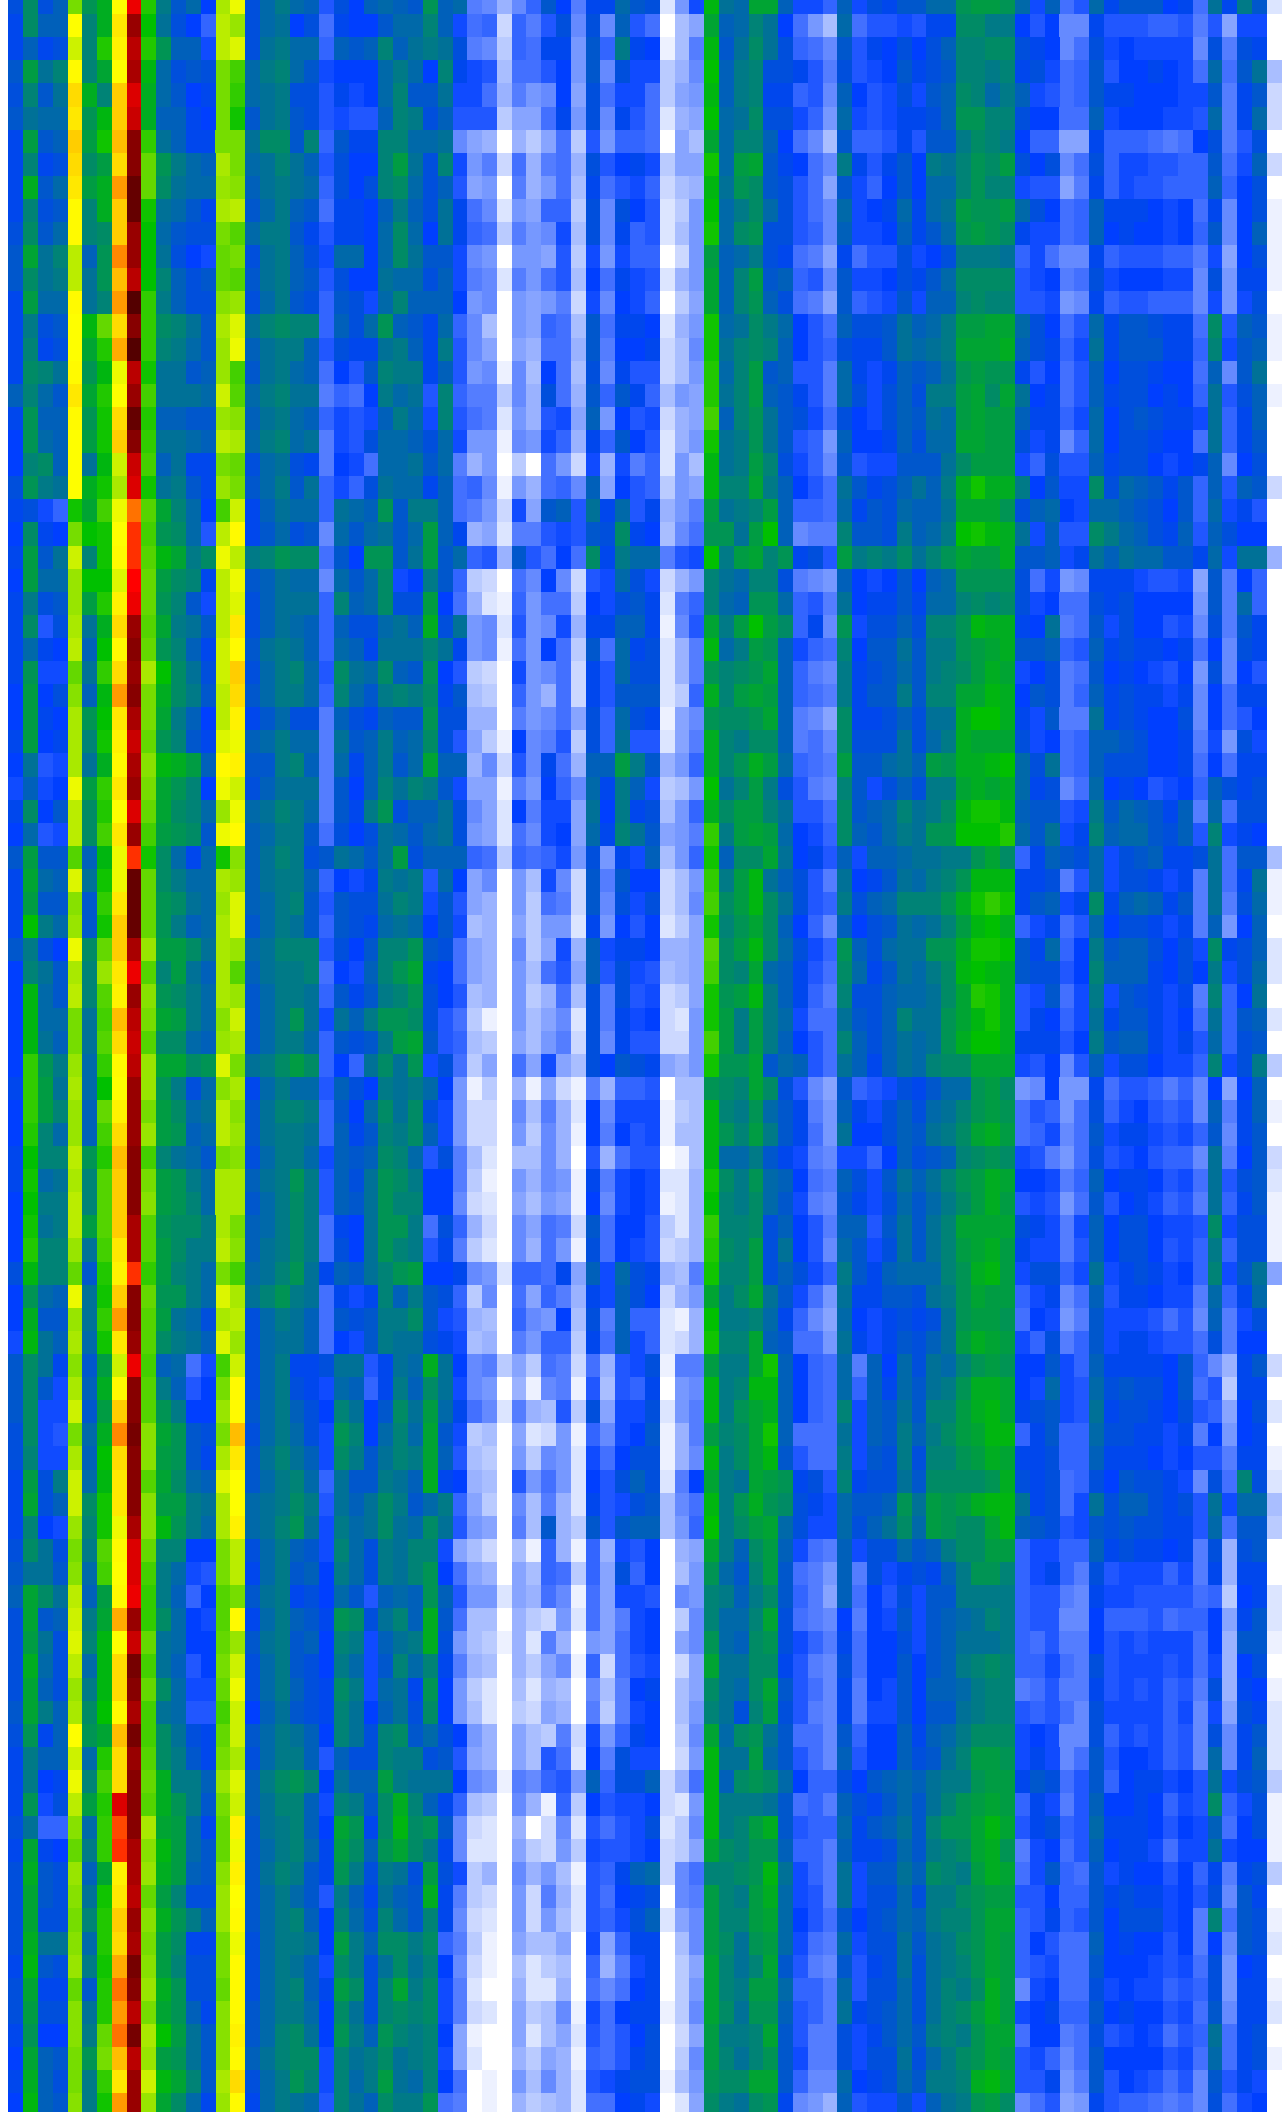

At3g66033  
At4g01800  
At1g23400  
At3g59780  
At1g07020  
At1g64860  
At5g17230  
At5g62140  
At5g17170  
At1g17220  
At1g23740  
At4g35250  
At1g57770  
At1g62740  
At1g35340  
At4g18370  
At2g21340  
At2g30390  
At4g39710  
At2g30170  
At4g36810  
At4g10060  
At1g28150  
At4g17040  
At2g40020  
At1g02560  
At4g14910  
At1g15730  
At4g31850  
At1g32550  
At4g30950  
At1g12410  
At5g58330  
At3g07670  
At5g57930  
At5g04900  
At4g24090  
At1g04800  
At1g03630  
At4g09010  
At2g43560  
At2g03750  
At2g35260  
At1g76100  
At3g56950  
At1g74470  
At2g32500  
At4g02530  
At1g77490  
At3g61870  
At5g35630  
At1g12900  
At4g21280  
At1g60950  
At1g44575  
At3g27690  
At5g44520  
At1g03600  
At4g20360  
At4g34830  
At1g08540  
At4g28080  
At3g26710  
At4g34820  
At3g24430  
At1g31800  
At1g26230  
At5g59250  
At5g14260  
At5g08740  
At1g73110  
At1g48030  
At1g11860  
At3g04790  
At3g11950  
At5g23060  
At4g27700  
At5g66520  
At5g02120  
At1g14345  
At5g51010  
At1g62780  
At2g21280  
At1g43560  
At4g01050  
At1g32470  
At5g08050  
At5g42070  
At5g45680  
At5g47840  
At2g35410  
At5g51110

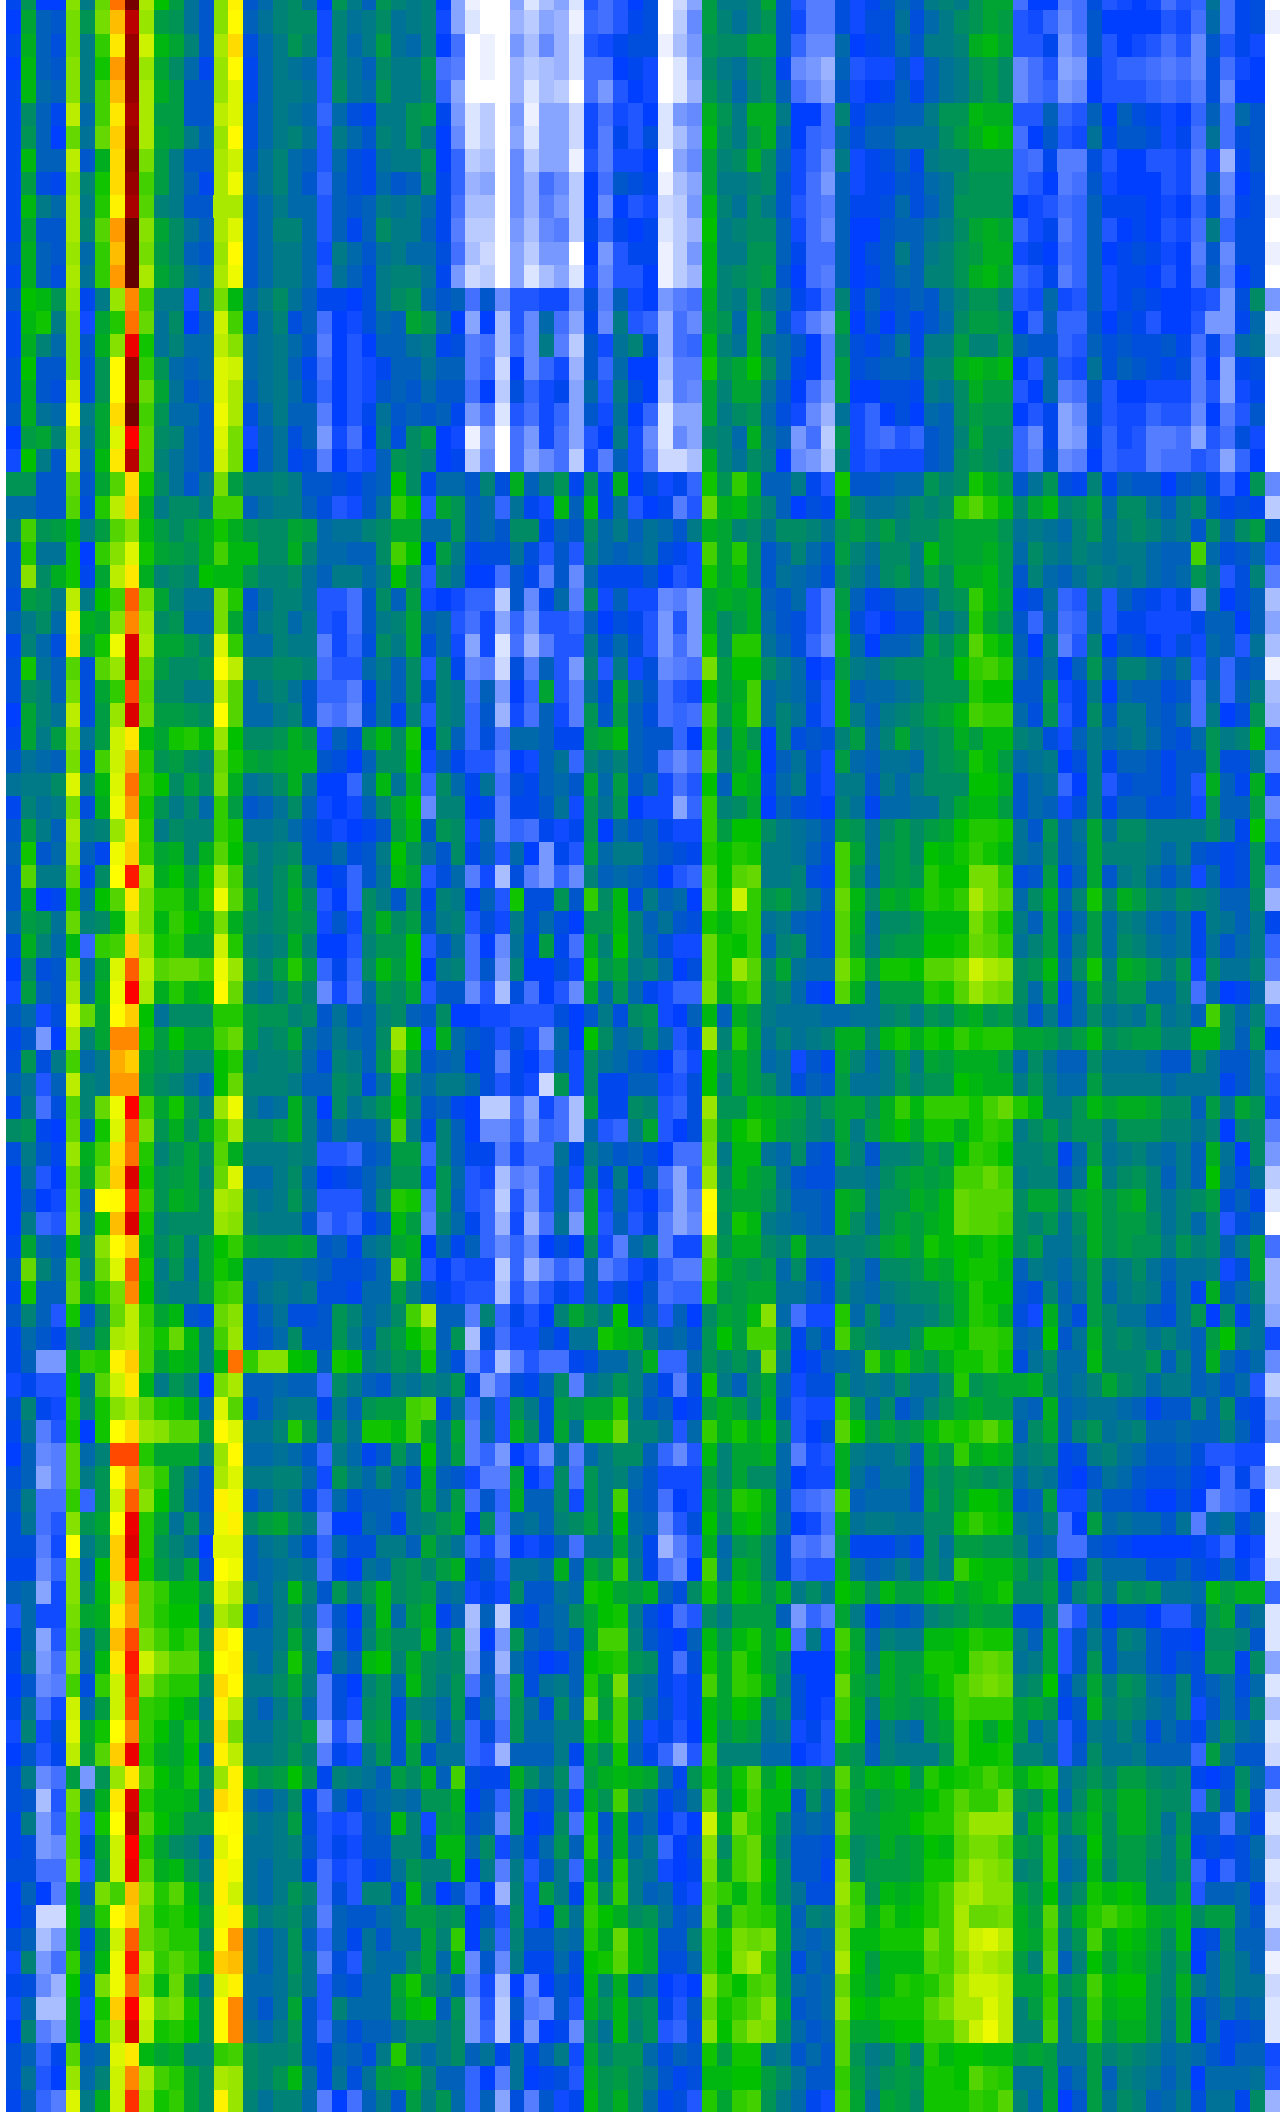

At3g03030  
At5g47840  
At2g35410  
At5g51110  
At4g34190  
At1g44920  
At5g52970  
At1g80030  
At1g04420  
At1g16080  
At3g56650  
At3g01480  
At3g55330  
At3g19720  
At1g03160  
At5g24300  
At1g50450  
At5g48220  
At1g02910  
At2g44870  
At4g35450  
At5g62220  
At1g21060  
At3g42440  
At3g48460  
At5g64850  
At4g13840  
At4g02420  
At5g07250  
At2g26540  
At1g51080  
At4g29750  
At1g42540  
At4g12980  
At5g03130  
At3g02720  
At4g33380  
At1g32900  
At3g01550  
At4g22753  
At2g40435  
At1g18360  
At5g08070  
At2g31070  
At4g31310  
At3g21390  
At2g31380  
At3g02380  
At5g12150  
At5g06770  
At5g65730  
At4g26555  
At5g54630  
At2g24270  
At4g10030  
At1g01540  
At2g34510  
At5g24690  
At3g19220  
At5g47435  
At4g09670  
At1g22940  
At4g34020  
At5g28840  
At1g17100  
At1g01970  
At1g33290  
At5g57960  
At5g04810  
At1g60690  
At5g09320  
At1g45230  
At4g21180  
At5g50280  
At1g11720  
At2g01320  
At5g64380  
At1g15690  
At2g41720  
At1g71720  
At1g10910  
At2g04270  
At2g02070  
At4g14090  
At3g12080  
At1g53120  
At4g35430  
At5g53860  
At4g24750  
At2g21320  
At3g58070  
At5g48730

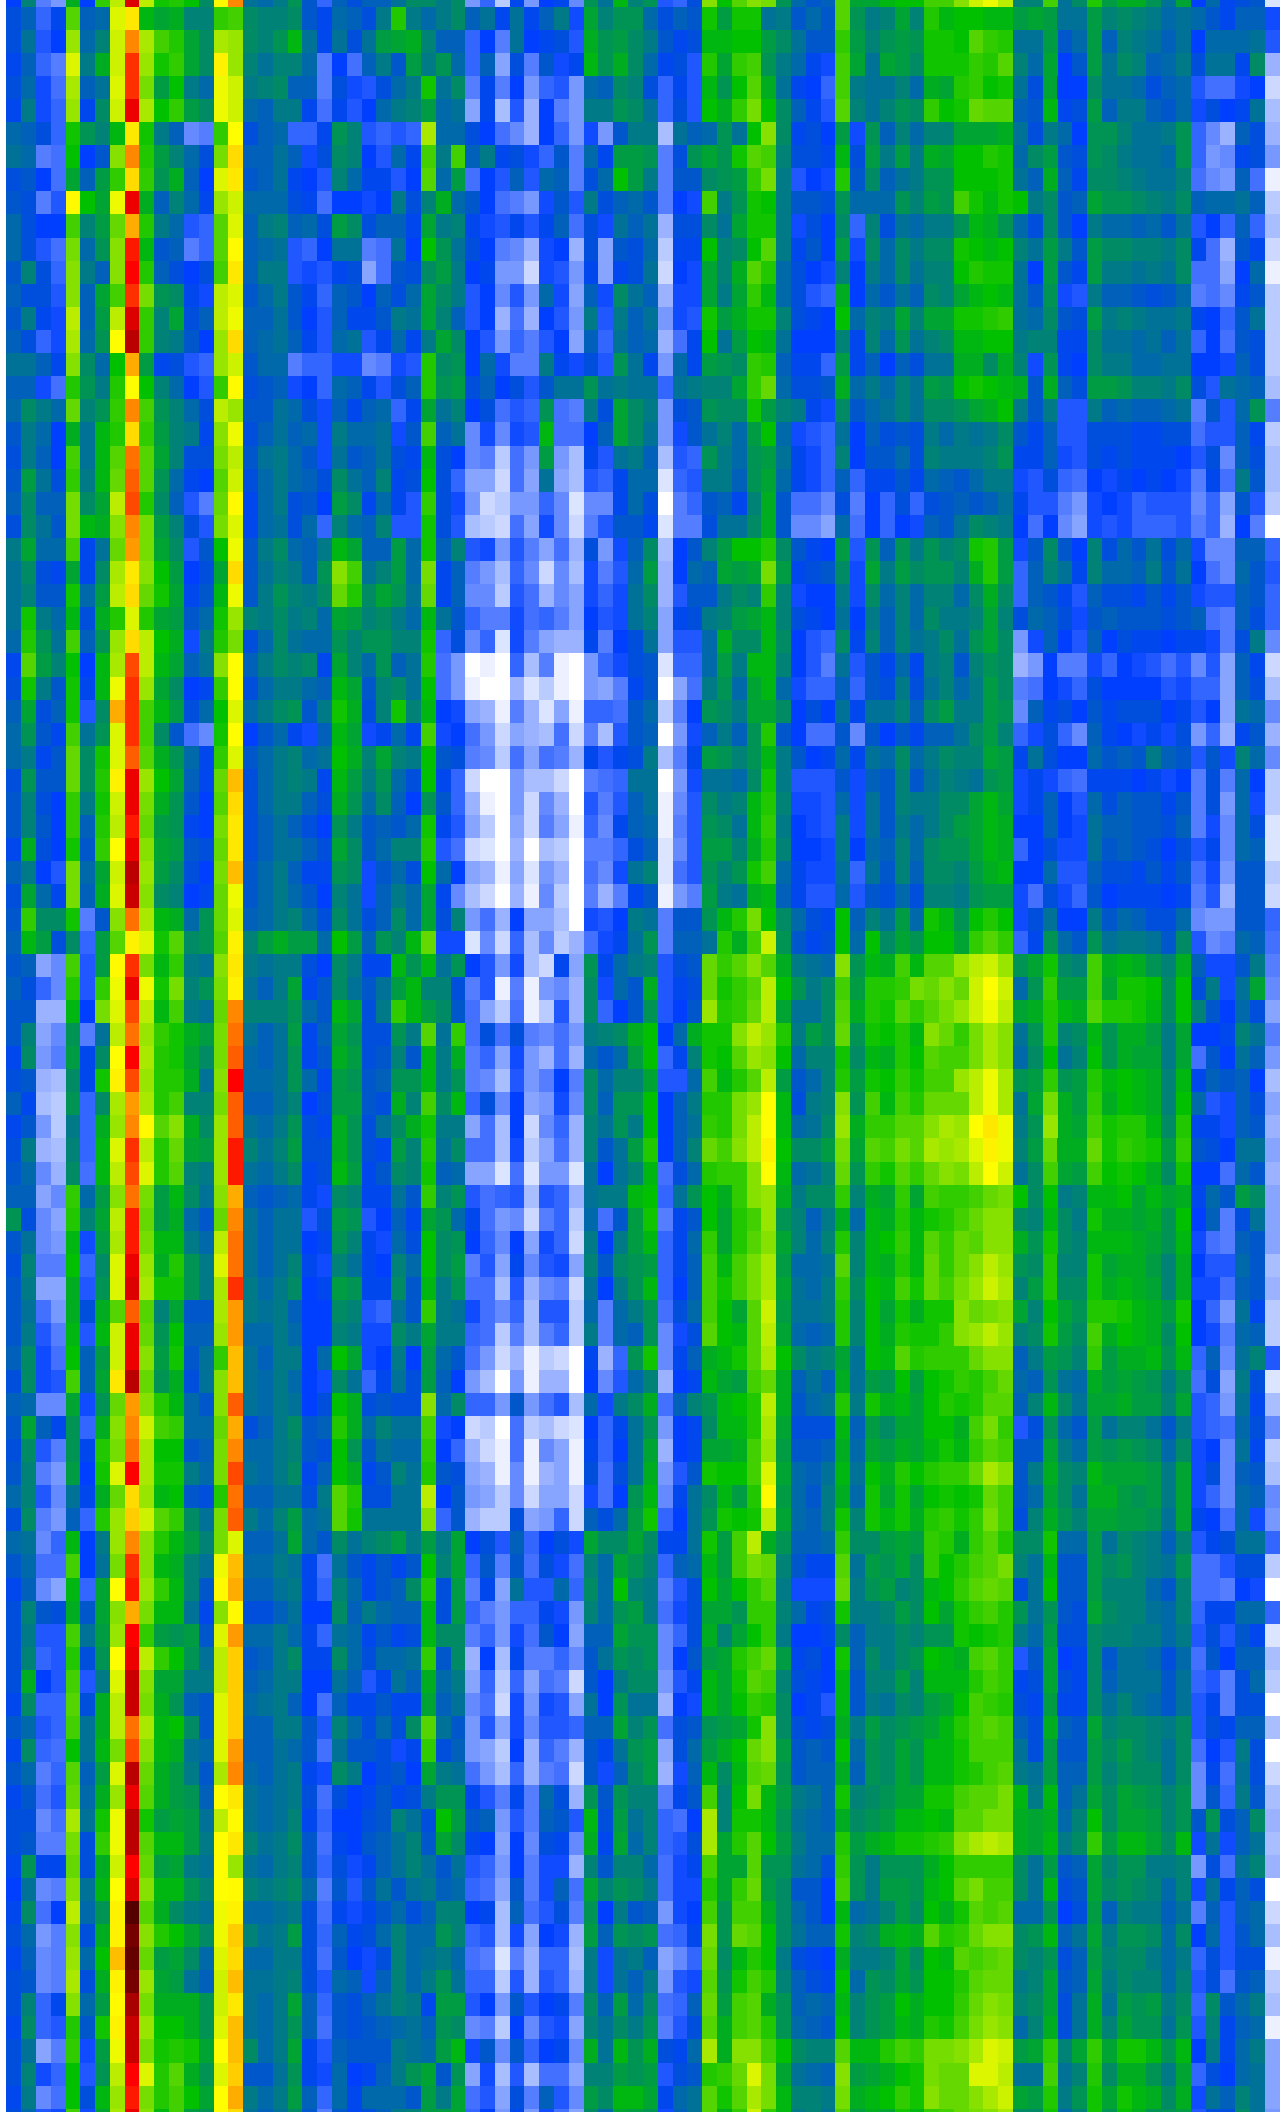

At2g21320  
At3g58070  
At5g48730  
At2g01290  
At4g39960  
At1g80600  
At4g24280  
At4g33350  
At5g53170  
At3g18870  
At1g60990  
At3g25470  
At2g15820  
At1g06820  
At4g30825  
At2g20690  
At5g65250  
At1g75010  
At1g80480  
At3g04560  
At5g51820  
At1g32500  
At1g66670  
At3g16670  
At3g05730  
At3g16660  
At5g43745  
At3g28590  
At1g15140  
At5g12860  
At2g40400  
At2g43750  
At3g56040  
At4g37040  
At4g12060  
At3g58140  
At2g21170  
At2g25830  
At5g64290  
At5g49920  
At2g25870  
At1g15290  
At2g26550  
At3g28040  
At2g28000  
At5g20730  
At4g38160  
At5g11270  
At5g59500  
At2g25840  
At3g12930  
At1g19800  
At3g20320  
At5g49030  
At5g16715  
At1g55490  
At2g47590  
At2g47940  
At5g09650  
At2g42770  
At3g53560  
At5g63570  
At2g15290  
At5g63310  
At2g19940  
At3g52960  
At5g17790  
At2g20020  
At1g02150  
At1g76050  
At5g40160  
At5g17710  
At1g56050  
At5g50250  
At5g52110  
At5g19370  
At5g52520  
At1g70060  
At3g49140  
At3g01370  
At3g19720  
At5g06060  
At2g21385  
At4g04350  
At2g36990  
At5g55740  
At5g16140  
At5g38290  
At5g18570  
At1g80770  
At3g47450

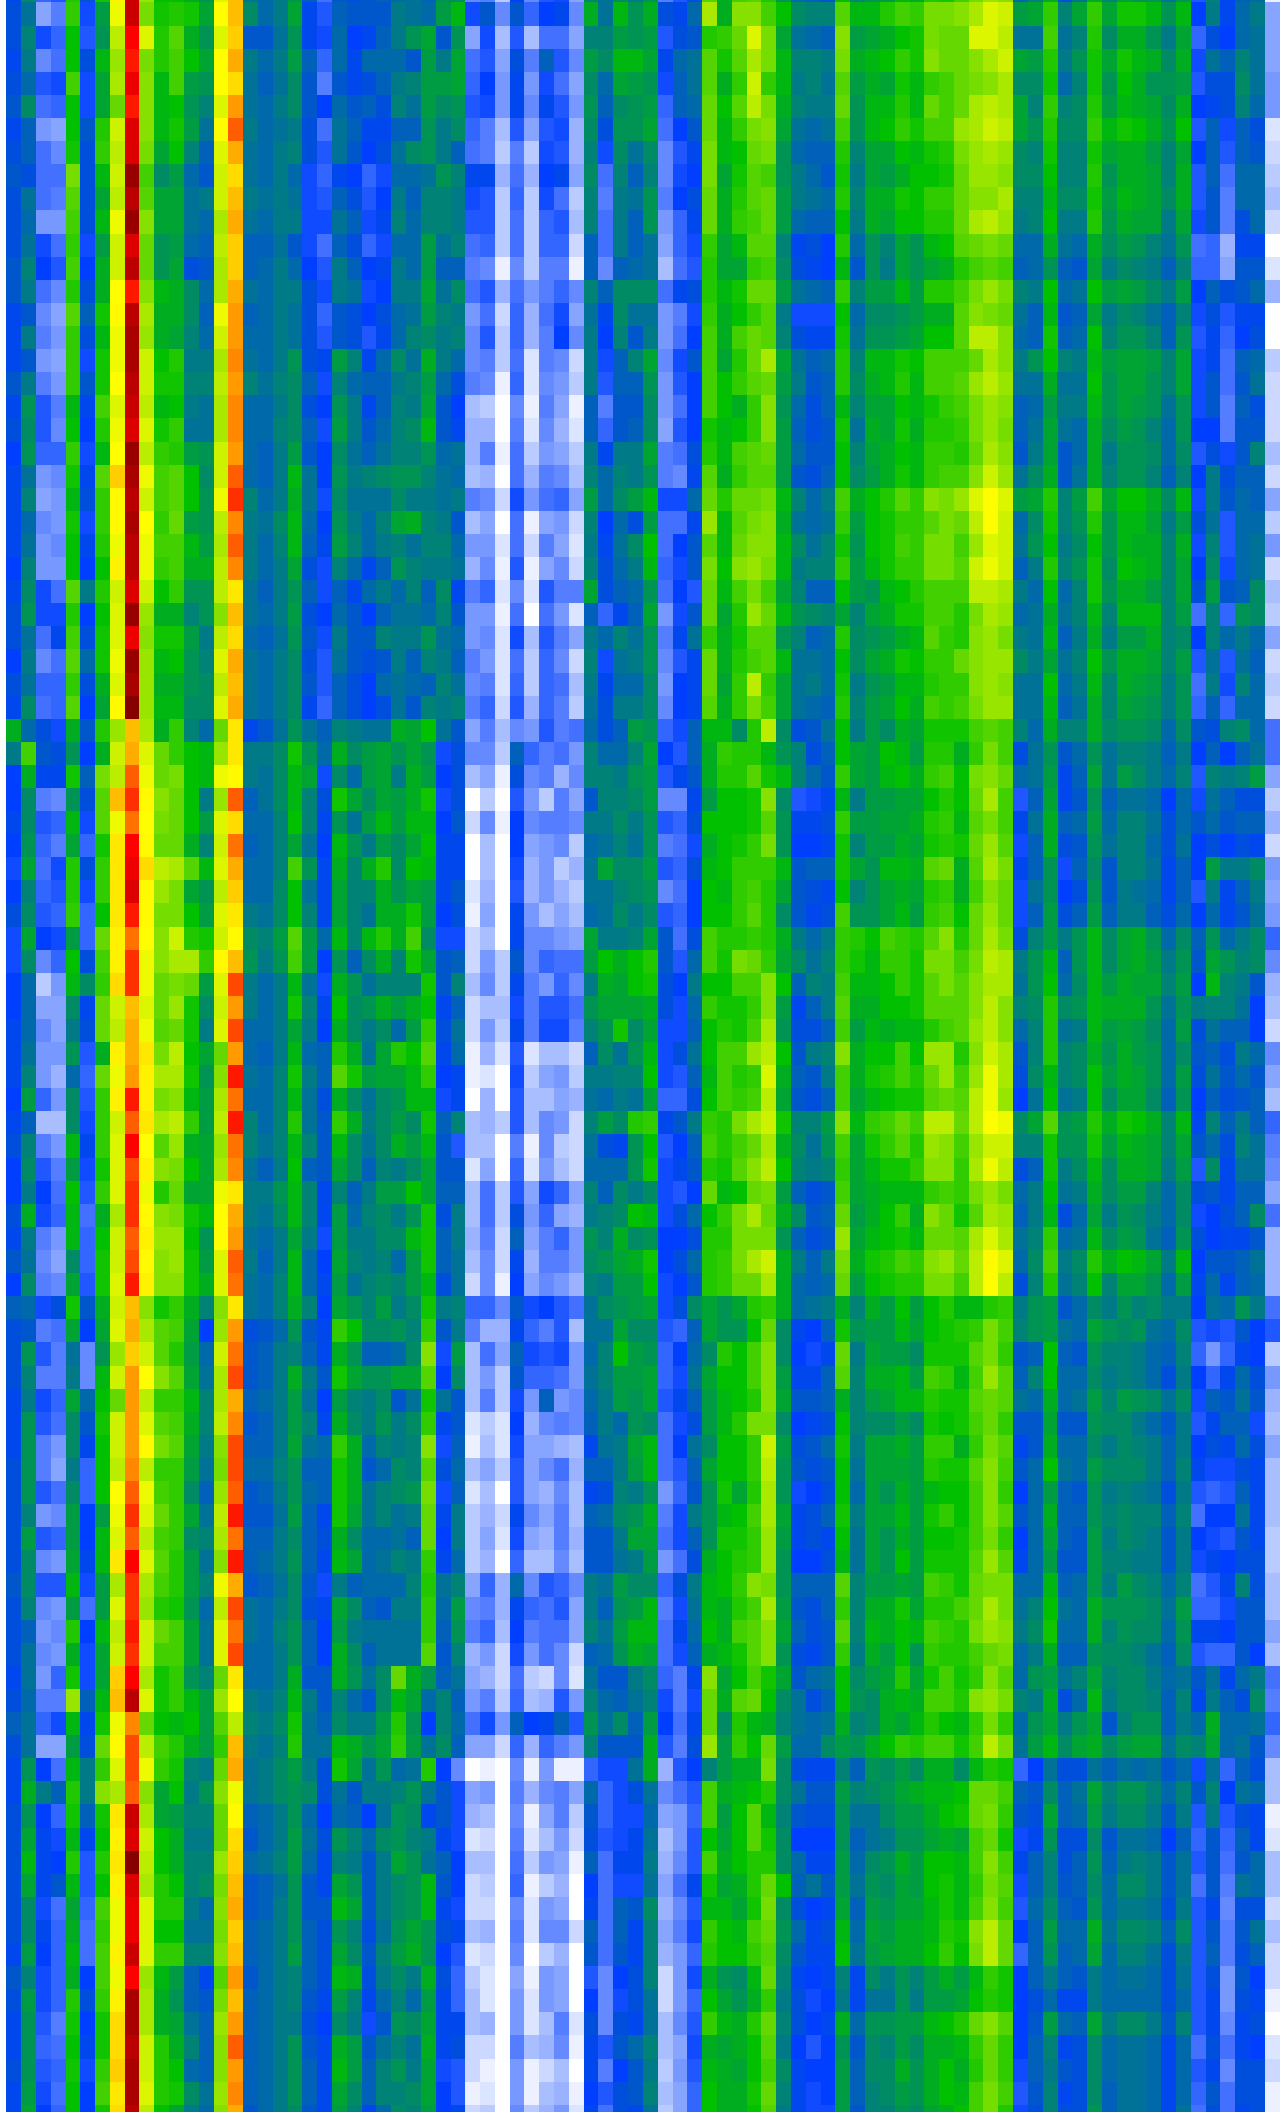

At5g18570  
At1g80770  
At3g47450  
At3g29230  
At3g48110  
At5g11480  
At1g14030  
At3g18390  
At5g66470  
At5g03940  
At4g37510  
At1g12800  
At1g60230  
At5g02710  
At4g39040  
At3g02660  
At4g17740  
At2g37660  
At5g05740  
At1g48520  
At3g29185  
At2g24060  
At1g60600  
At1g36390  
At2g44650  
At1g23360  
At2g02500  
At2g45770  
At1g63610  
At4g02790  
At3g62910  
At2g42070  
At1g18440  
At1g31410  
At5g52960  
At4g09040  
At3g25480  
At2g26930  
At1g51100  
At5g63100  
At3g56160  
At5g14100  
At1g33810  
At3g27770  
At3g20230  
At3g61770  
At5g58250  
At4g17560  
At2g41950  
At5g48830  
At4g32915  
At1g53800  
At2g31170  
At3g02450  
At4g20960  
At2g30695  
At2g02980  
At2g31400  
At1g06190  
At3g06980  
At1g13270  
At2g17240  
At3g59980  
At1g17650  
At3g63190  
At3g51140  
At2g24020  
At3g08740  
At2g04360  
At1g11870  
At1g70200  
At5g46580  
At3g48610  
At1g29530  
At5g18430  
At5g20630  
At2g20270  
At1g66940  
At5g17870  
At5g40950  
At3g15520  
At1g69740  
At5g08280  
At3g14930  
At2g40490  
At5g45930  
At3g26060  
At1g07320  
At2g33450  
At4g18480  
At1g32990  
At1g74870

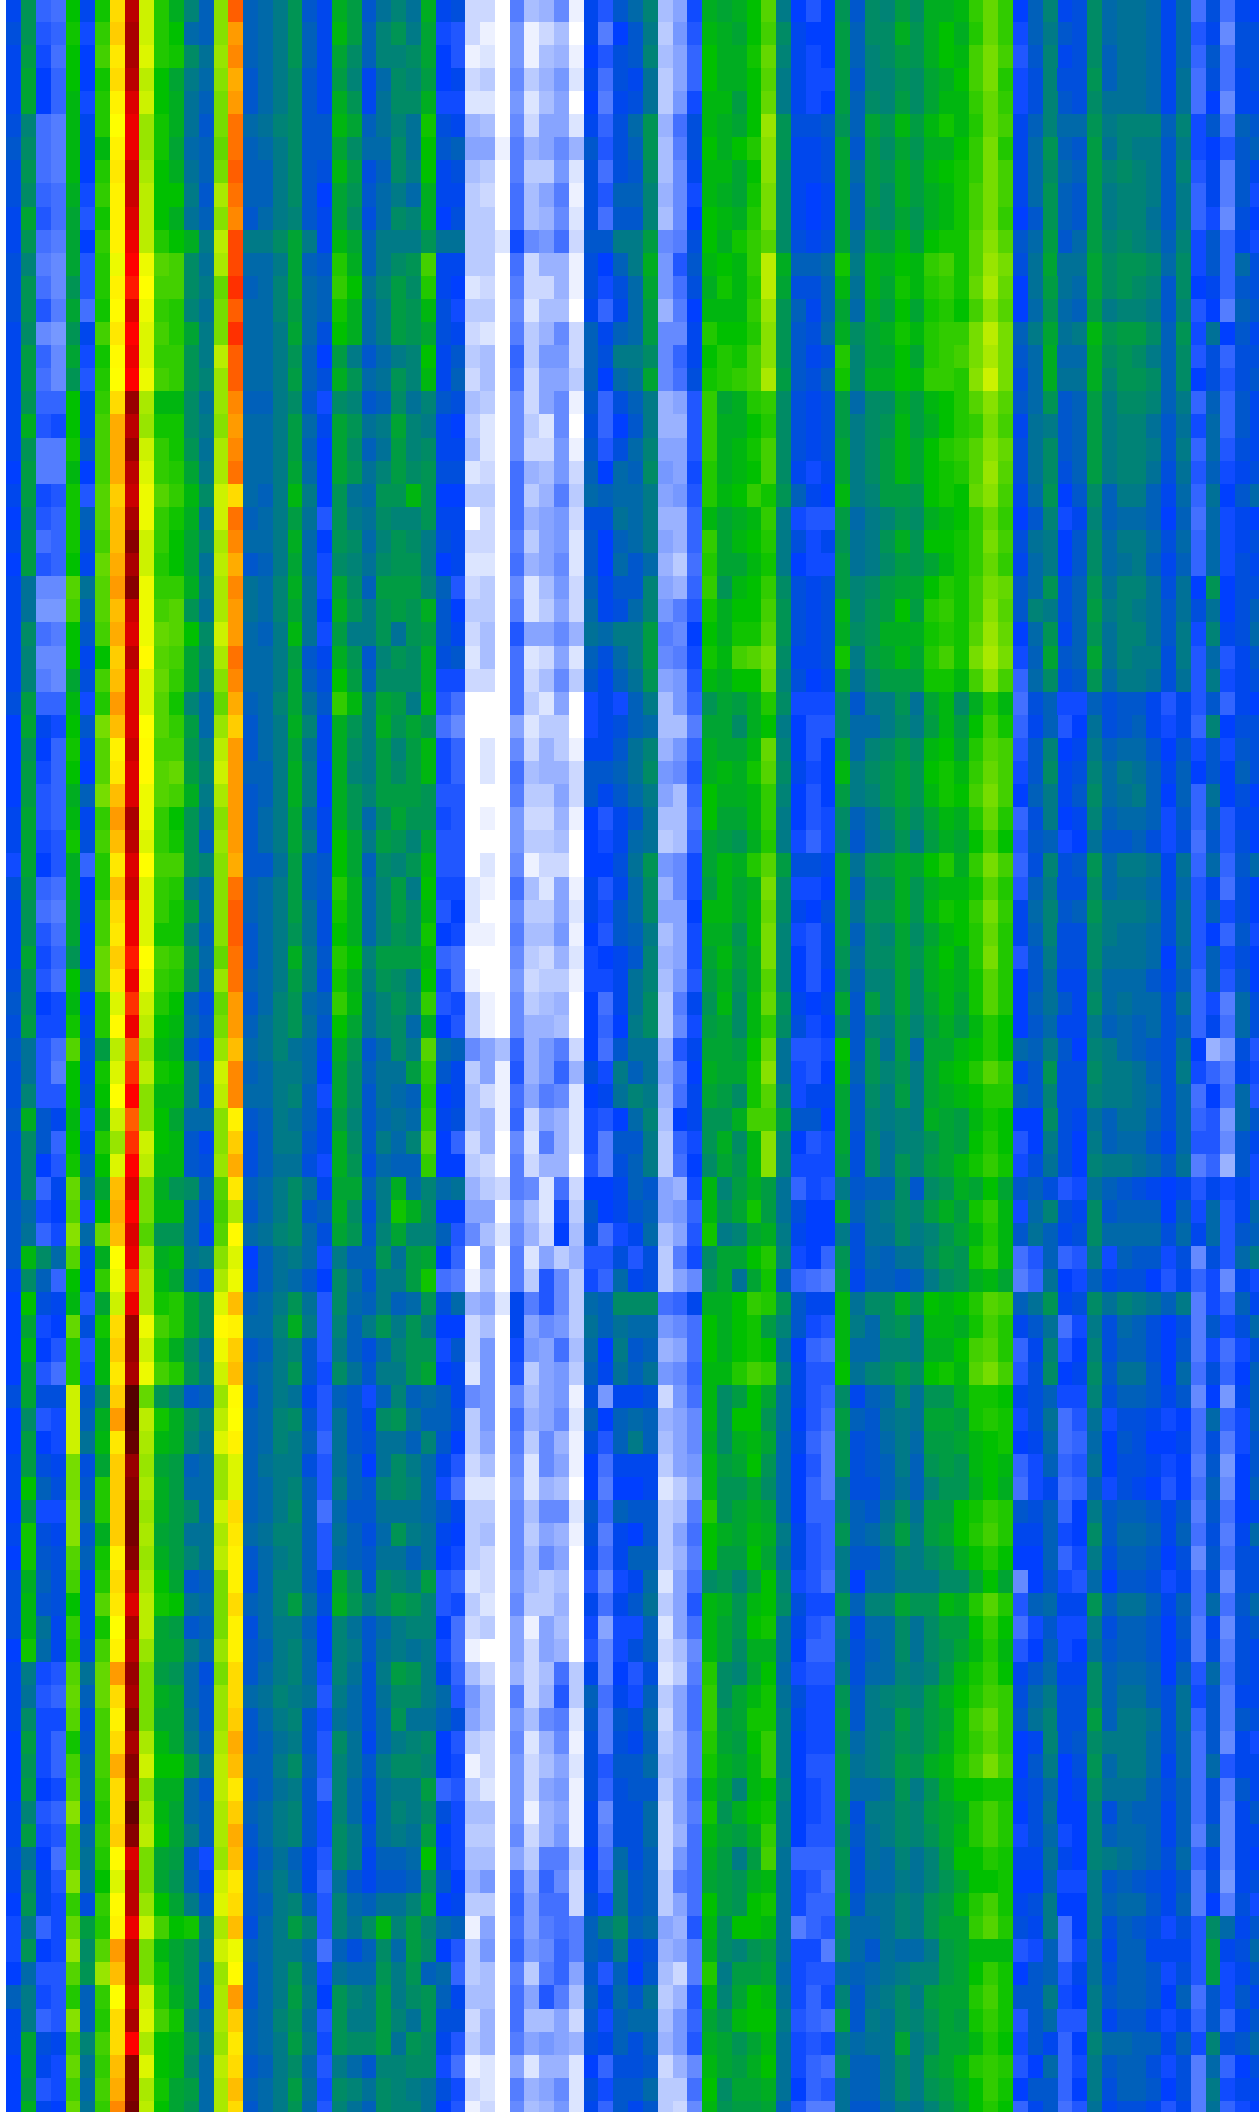

At2g33450  
At1g18480  
At1g32990  
At1g74970  
At3g15190  
At2g35500  
At5g22340  
At4g01310  
At3g52150  
At1g78630  
At3g21200  
At3g48730  
At5g47190  
At3g25660  
At1g48350  
At5g11450  
At3g44890  
At1g35680  
At4g25050  
At3g56900  
At2g33800  
At1g32200  
At5g14910  
At3g25910  
At2g43030  
At2g29180  
At1g60000  
At3g60370  
At2g33180  
At2g38140  
At4g28660  
At1g50900  
At1g01080  
At5g42765  
At5g65220  
At1g29070  
At5g13510  
At5g13120  
At2g24090  
At1g79850  
At3g13120  
At1g64510  
At1g68590  
At4g01690  
At4g15510  
At1g01320  
At2g17033  
At5g14660  
At4g17300  
At1g03475  
At5g45390  
At1g10960  
At3g59400  
At2g34620  
At4g33520  
At2g37220  
At5g54180  
At5g62840  
At4g24770  
At3g52390  
At2g41680  
At4g11175  
At5g44650  
At2g23670  
At1g74730  
At5g30510  
At3g51820  
At3g62030  
At3g27160  
At2g42220  
At5g06290  
At3g11630  
At4g25080  
At3g09580  
At1g08520  
At5g14320  
At1g05190  
At3g63410  
At4g17600  
At5g54600  
At1g22700  
At3g24590  
At3g63500  
At3g06950  
At5g51540  
At4g14870  
At5g46420  
At2g17972  
At1g21350  
At3g47650  
At3g54210  
At1g75350

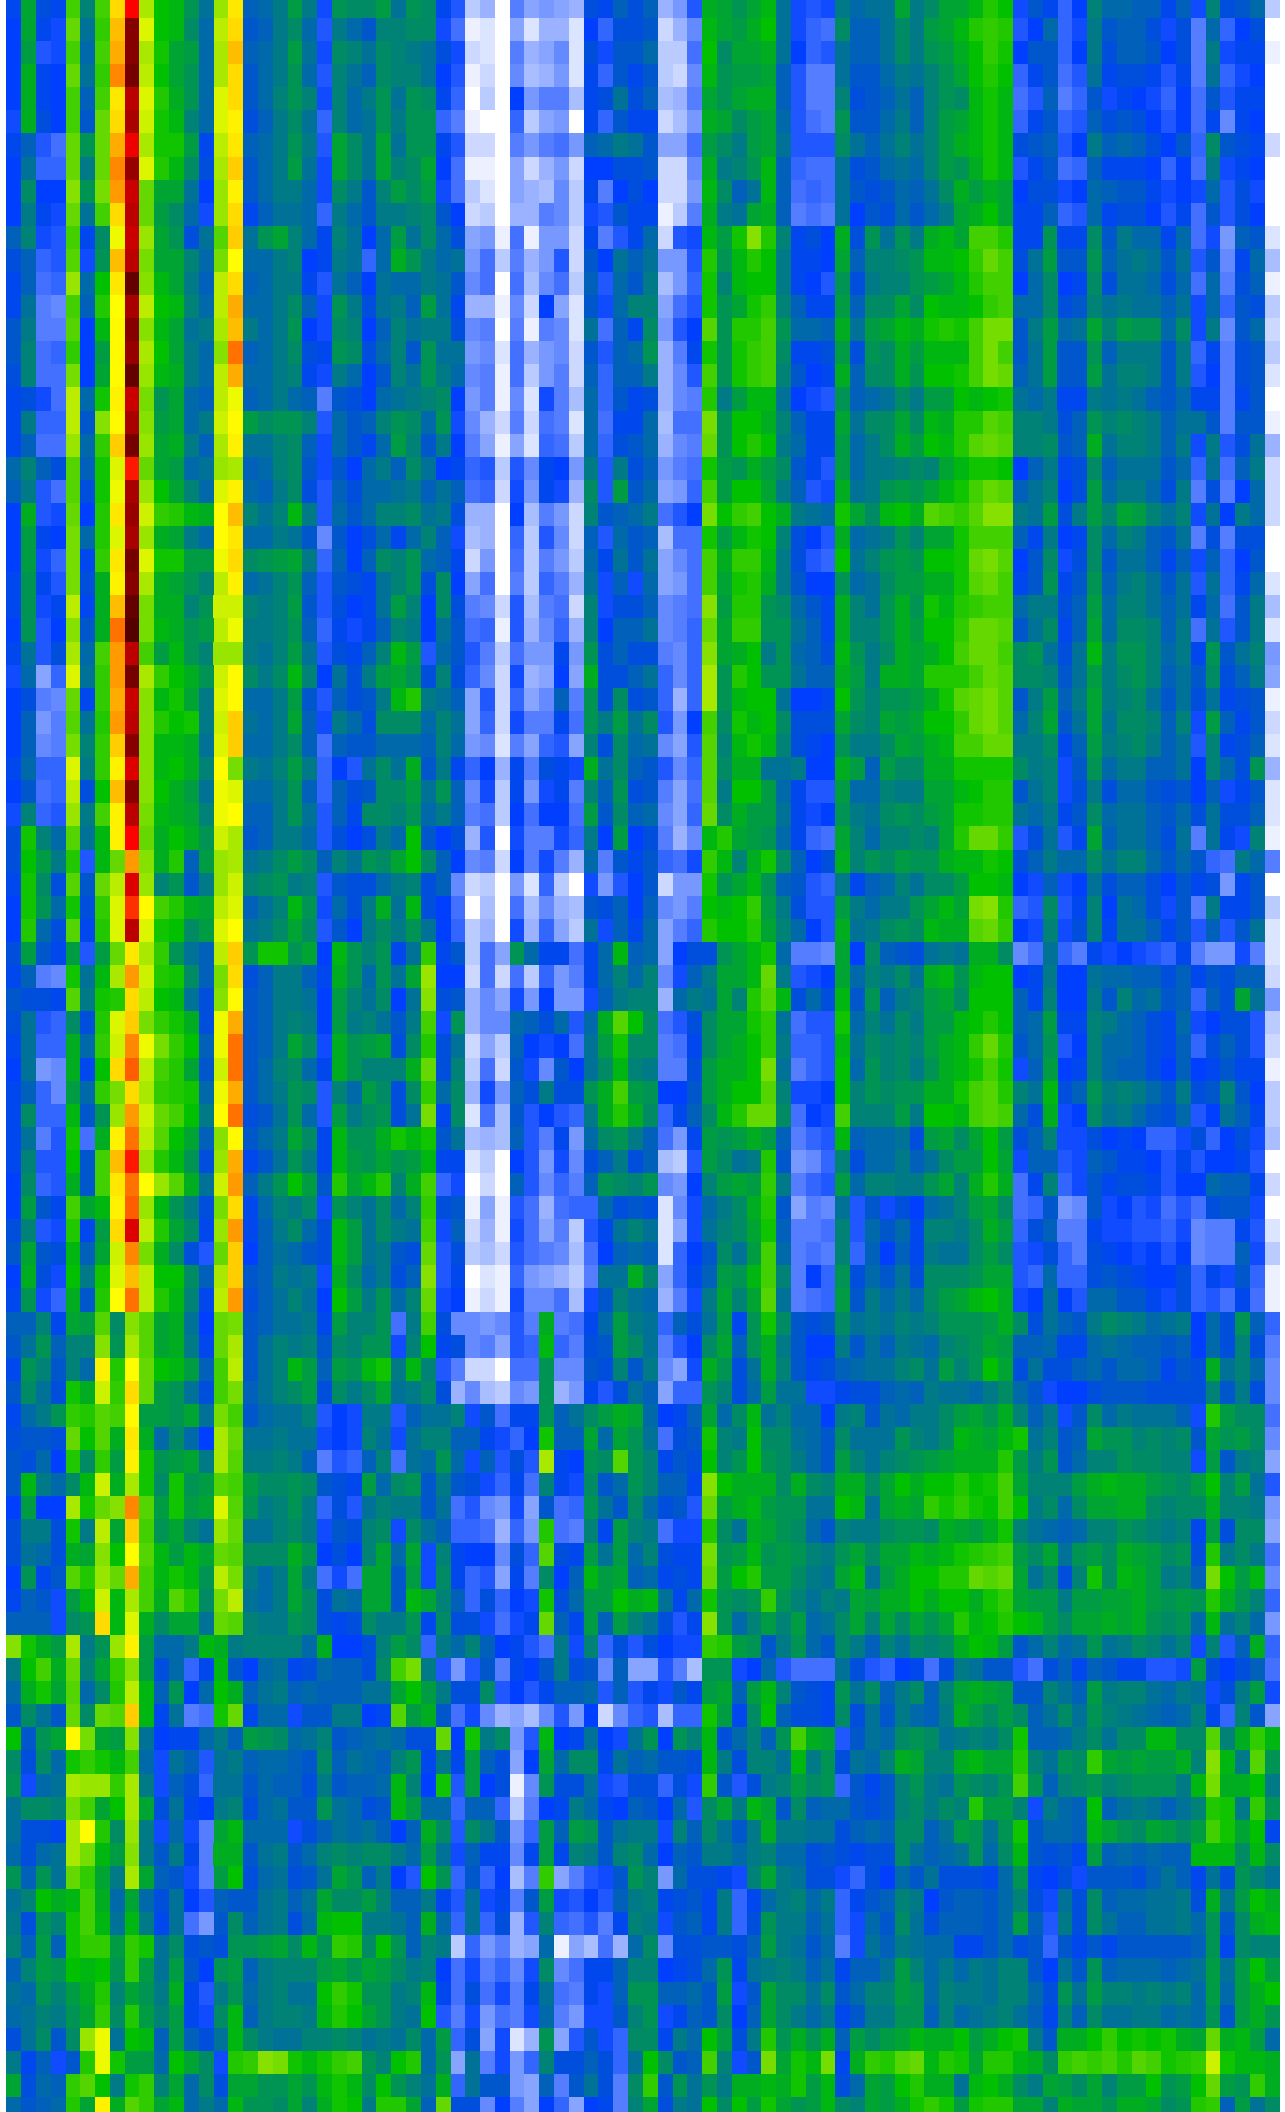

At1g21350  
At3g47650  
At3g54210  
At1g75350  
At3g25805  
At2g20890  
At4g03150  
At4g14890  
At5g47110  
At5g52440  
At2g21860  
At4g34730  
At3g09210  
At2g03420  
At5g18660  
At5g55220  
At4g29060  
At3g04760  
At5g57030  
At2g37450  
At5g16810  
At4g15110  
At3g53130  
At2g42130  
At1g14270  
At1g59840  
At2g32640  
At5g17670  
At3g17040  
At1g49010  
At2g36000  
At5g57170  
At4g19100  
At1g06240  
At3g22150  
At5g36170  
At1g77060  
At1g68890  
At4g20760  
At1g73530  
At1g64150  
At2g38270  
At4g26500  
At2g44760  
At3g13740  
At3g19810  
At4g30580  
At1g21600  
At1g08640  
At3g25410  
At2g18710  
At3g05410  
At5g06340  
At4g36390  
At3g10670  
At5g17560  
At1g11750  
At3g19490  
At3g18080  
At4g27440  
At3g47860  
At2g18290  
At2g39930  
At1g67660  
At5g22580  
At4g00490  
At3g29320  
At4g01130  
At3g60810  
At4g31050  
At1g51940  
At1g49780  
At4g16490  
At2g40860  
At1g31420  
At4g02120  
At1g75820  
At5g11720  
At1g10470  
At1g48420  
At5g61420  
At2g47390  
At3g19710  
At1g74090  
At1g09850  
At4g12030  
At3g58990  
At2g43100  
At3g12290  
At5g43830  
At3g47590  
At1g01630



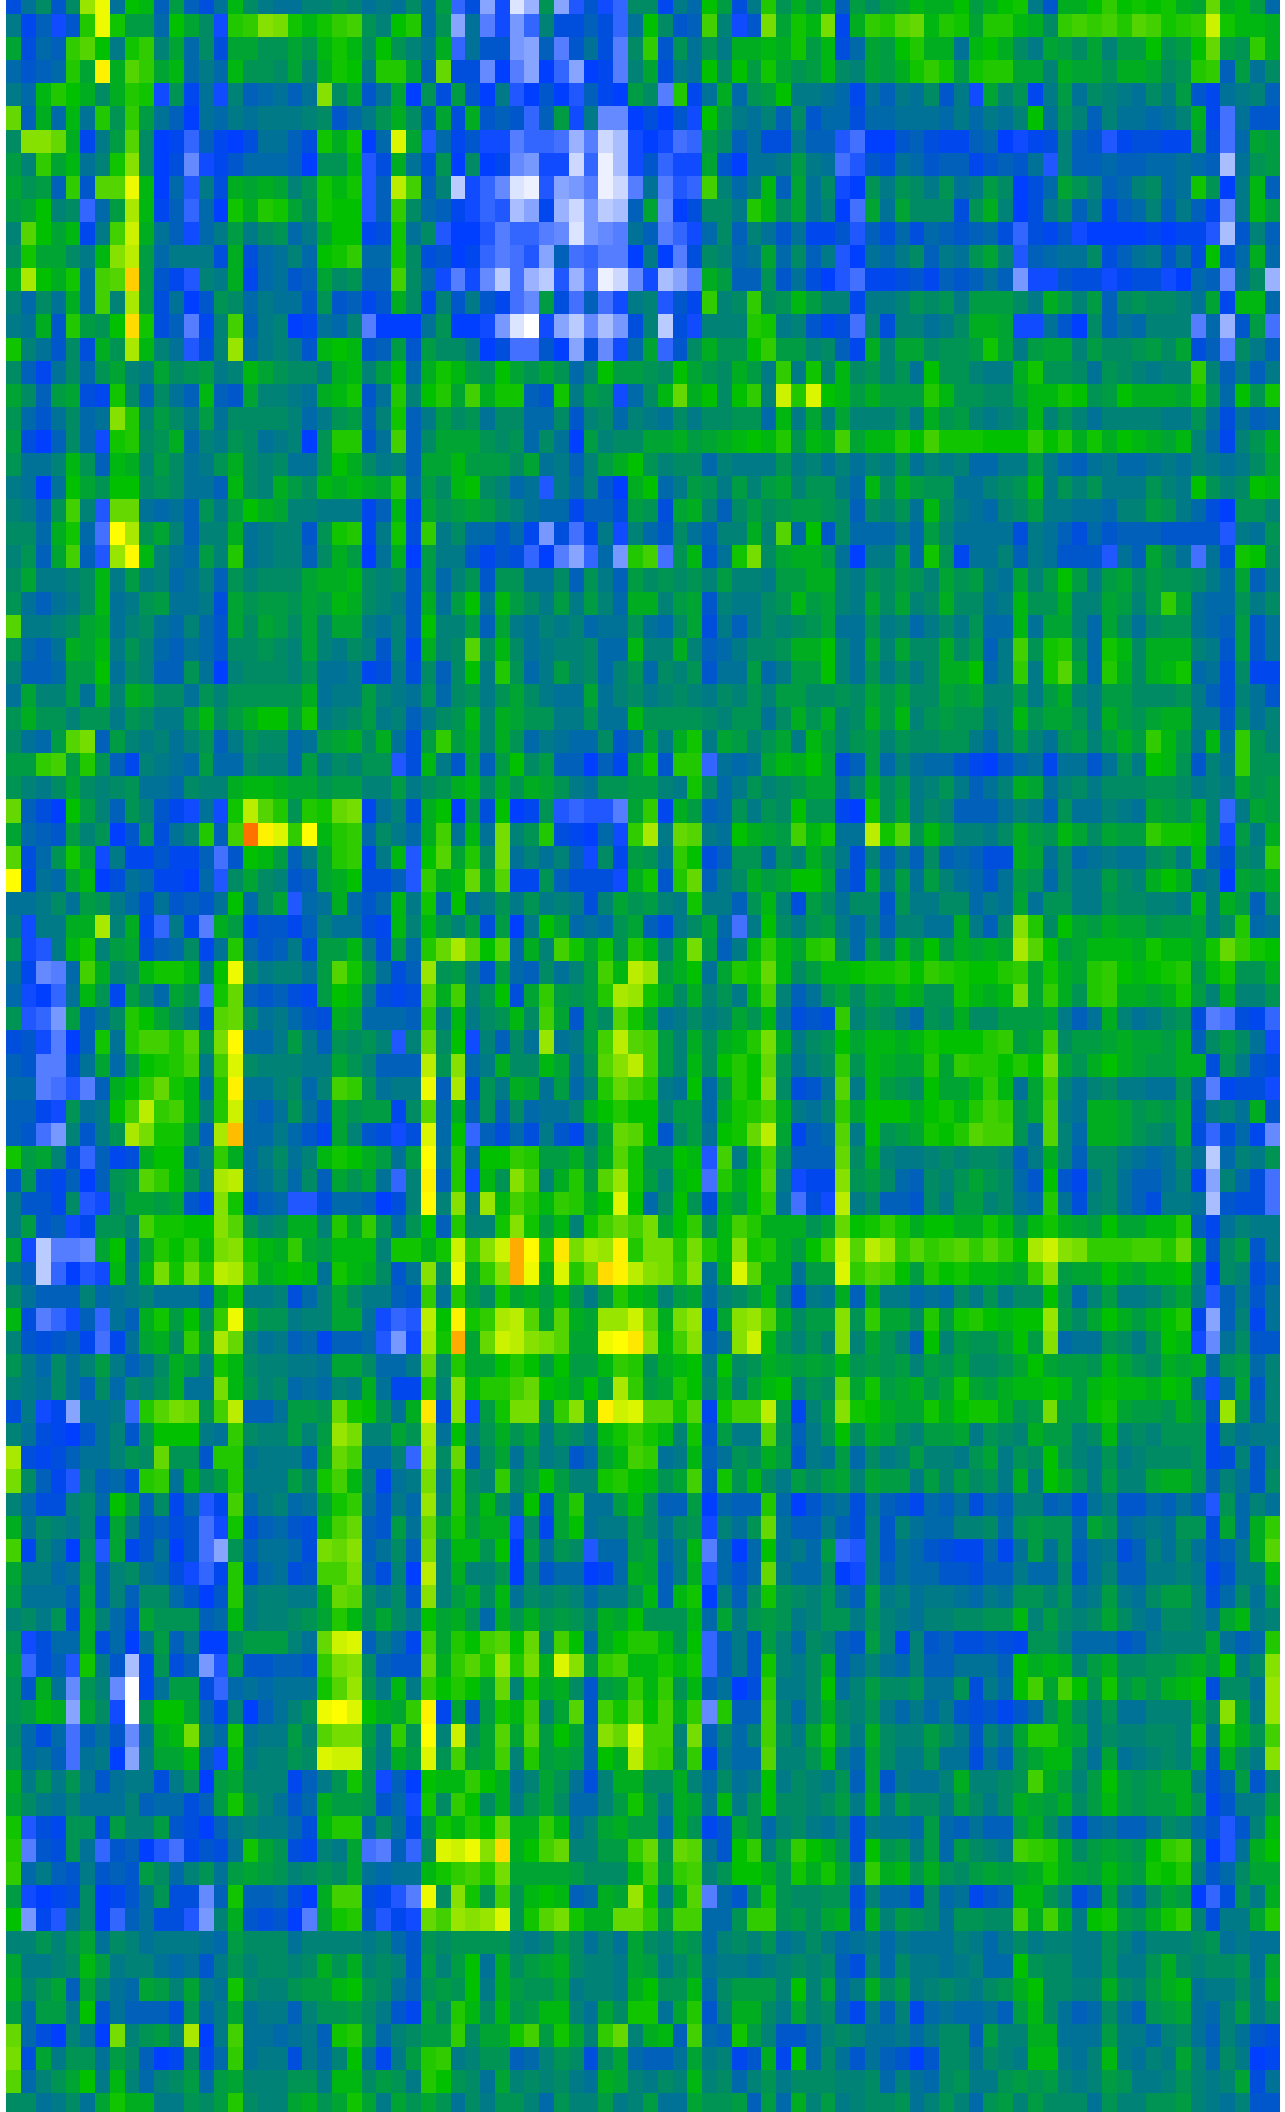

At3g12290  
At5g43830  
At3g47590  
At1g01630  
At2g14590  
At2g30070  
At5g52060  
At2g27820  
At4g33530  
At3g03780  
At1g19450  
At1g23480  
At3g11700  
At5g41150  
At1g14310  
At3g45430  
At3g22840  
At3g29200  
At4g14690  
At5g17050  
At3g56890  
At3g23930  
At5g14760  
At3g17609  
At1g32440  
At3g18180  
At3g21860  
At3g25750  
At2g03190  
At5g07160  
At2g44250  
At1g31530  
At4g21470  
At5g43430  
At2g13070  
At1g23190  
At4g29130  
At3g24170  
At3g08590  
At3g43650  
At5g19010  
At5g14430  
At5g63000  
At2g05830  
At2g19860  
At4g26670  
At5g08260  
At4g25990  
At5g54880  
At3g18420  
At3g44370  
At1g26160  
At3g06200  
At1g55050  
At4g00755  
At1g19140  
At3g28260  
At5g53540  
At3g07630  
At1g34100  
At4g09080  
At1g71730  
At3g48700  
At5g51320  
At2g14470  
At5g26200  
At5g05860  
At1g77760  
At5g40850  
At5g35290  
At3g30190  
At3g03100  
At2g43760  
At1g54030  
At3g12030  
At5g66920  
At3g23800  
At2g15070  
At3g31460  
At4g37320  
At3g15090  
At1g06020  
At5g08570  
At5g65780  
At3g04280  
At3g30650  
At1g47730  
At5g60110  
At4g08100  
At2g18930  
At5g27810  
At3g03410

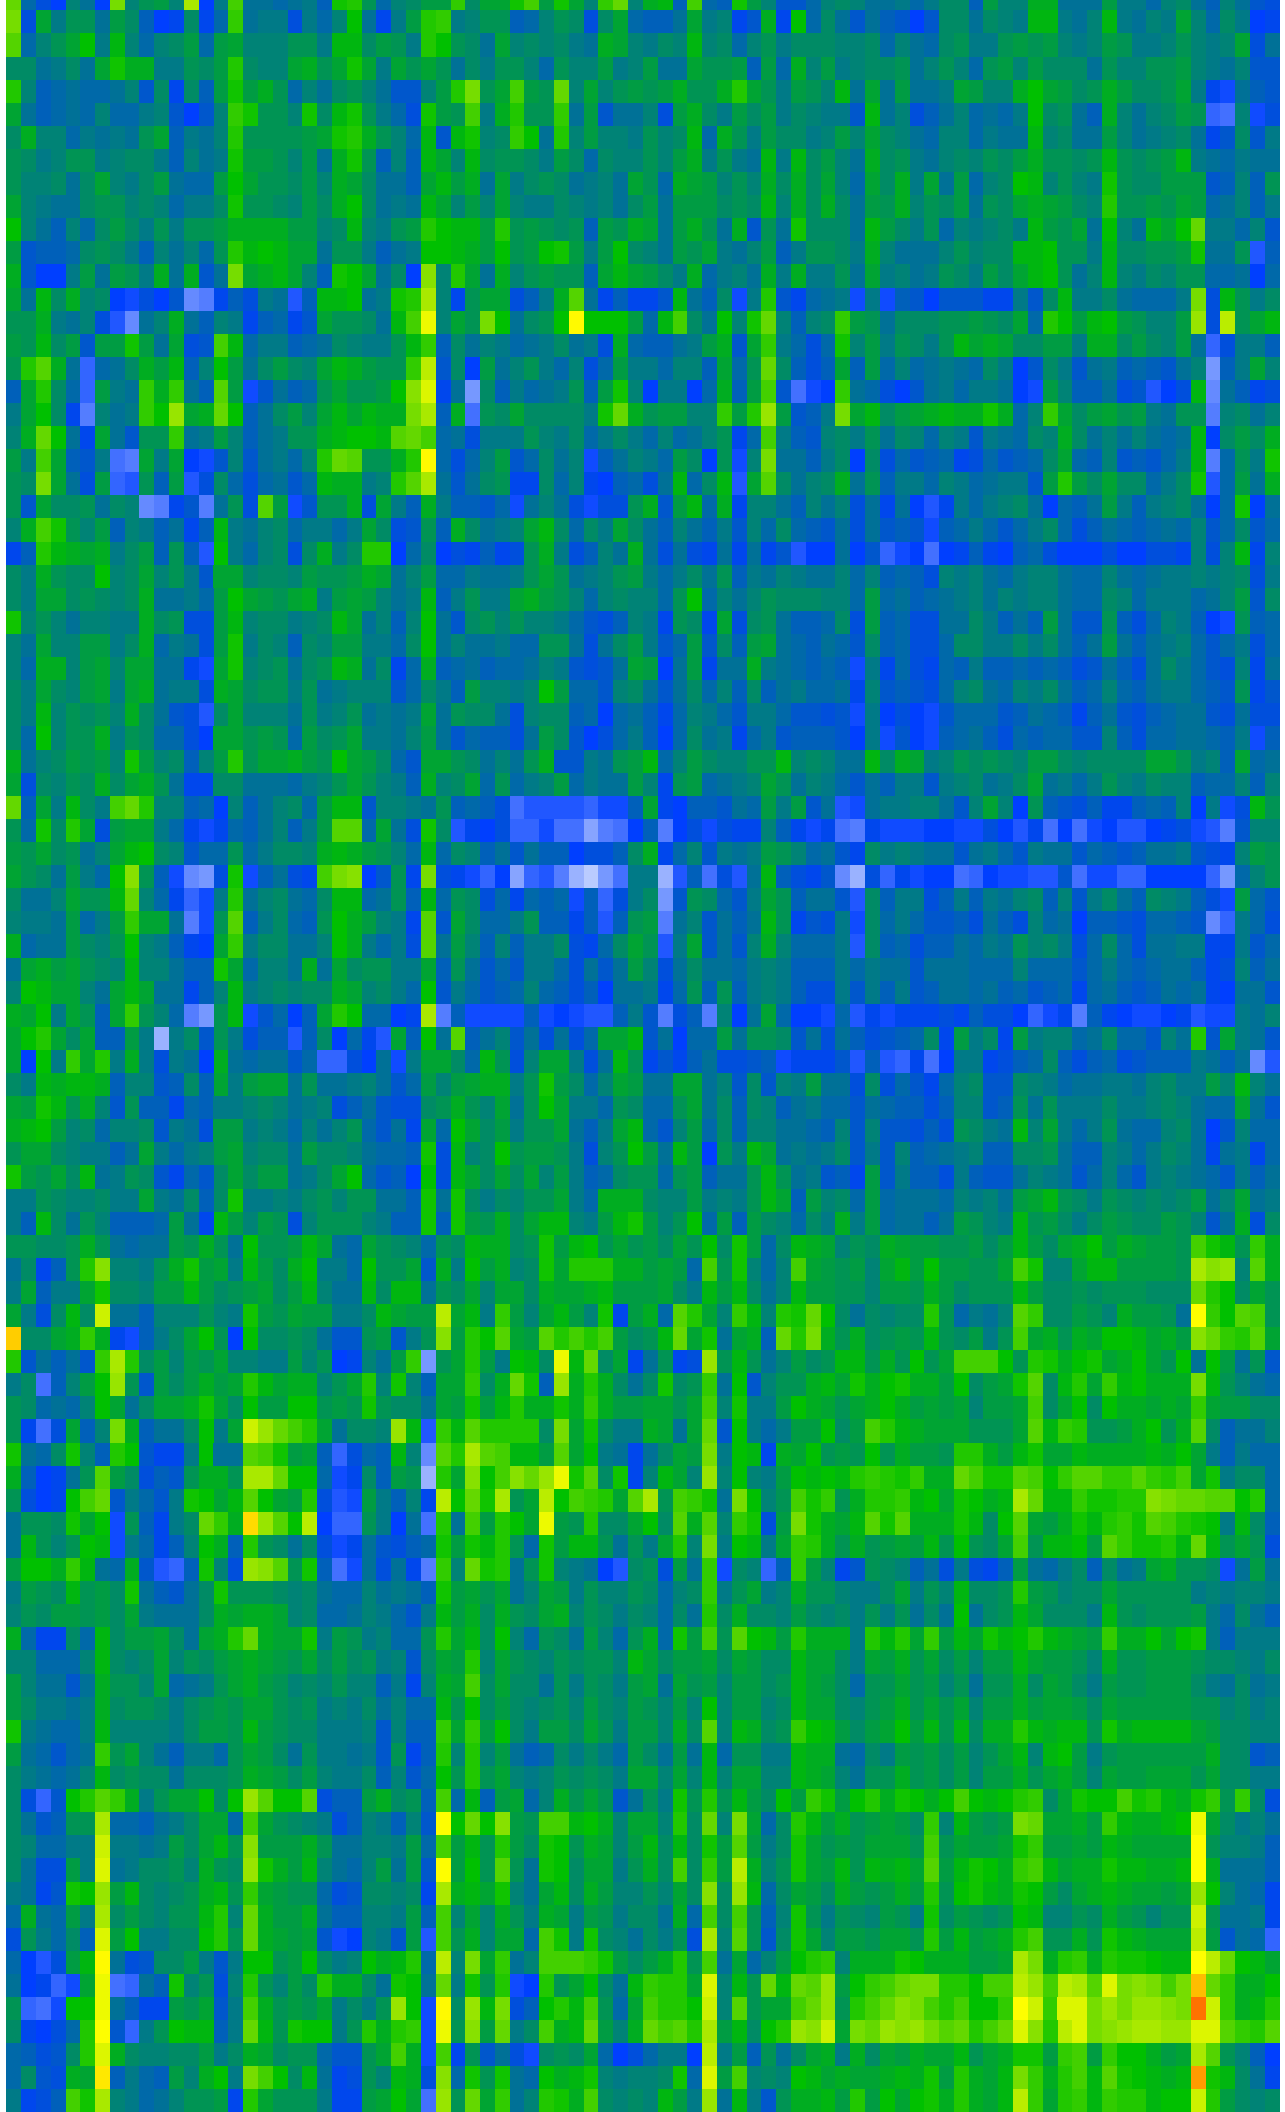

At4g08180  
At2g18930  
At5g27810  
At3g03410  
At5g27080  
At1g23630  
At5g38400  
At2g14410  
At4g07515  
At3g17080  
At2g26720  
At2g16520  
At2g05960  
At4g14160  
At3g59020  
At5g02310  
At5g24710  
At4g16143  
At5g35430  
At3g50590  
At4g32640  
At5g53480  
At3g42120  
At3g23650  
At3g29600  
At4g18080  
At2g14270  
At1g48070  
At3g16930  
At2g10380  
At5g03920  
At4g04070  
At2g11220  
At3g18070  
At4g07660  
At5g07860  
At2g04160  
At1g21340  
At2g15620  
At4g03760  
At3g22120  
At2g07510  
At5g37030  
At1g66380  
At5g04590  
At1g32650  
At2g16820  
At2g13270  
At2g16160  
At4g03690  
At2g15800  
At2g11165  
At3g07710  
At2g17210  
At3g03910  
At2g28870  
At3g59845  
At4g22740  
At5g52390  
At2g25900  
At5g18670  
At2g18420  
At3g27350  
At3g49160  
At4g14500  
At5g49650  
At1g34340  
At4g15210  
At1g12880  
At1g56620  
At2g20070  
At4g36770  
At3g05460  
At3g57250  
At1g12180  
At4g21630  
At4g09090  
At3g24510  
At4g14930  
At1g78960  
At1g15360  
At2g38110  
At4g19430  
At4g16590  
At1g10060  
At1g63690  
At1g13280  
At3g50530  
At2g41760  
At4g21620  
At1g66350  
At1g01830

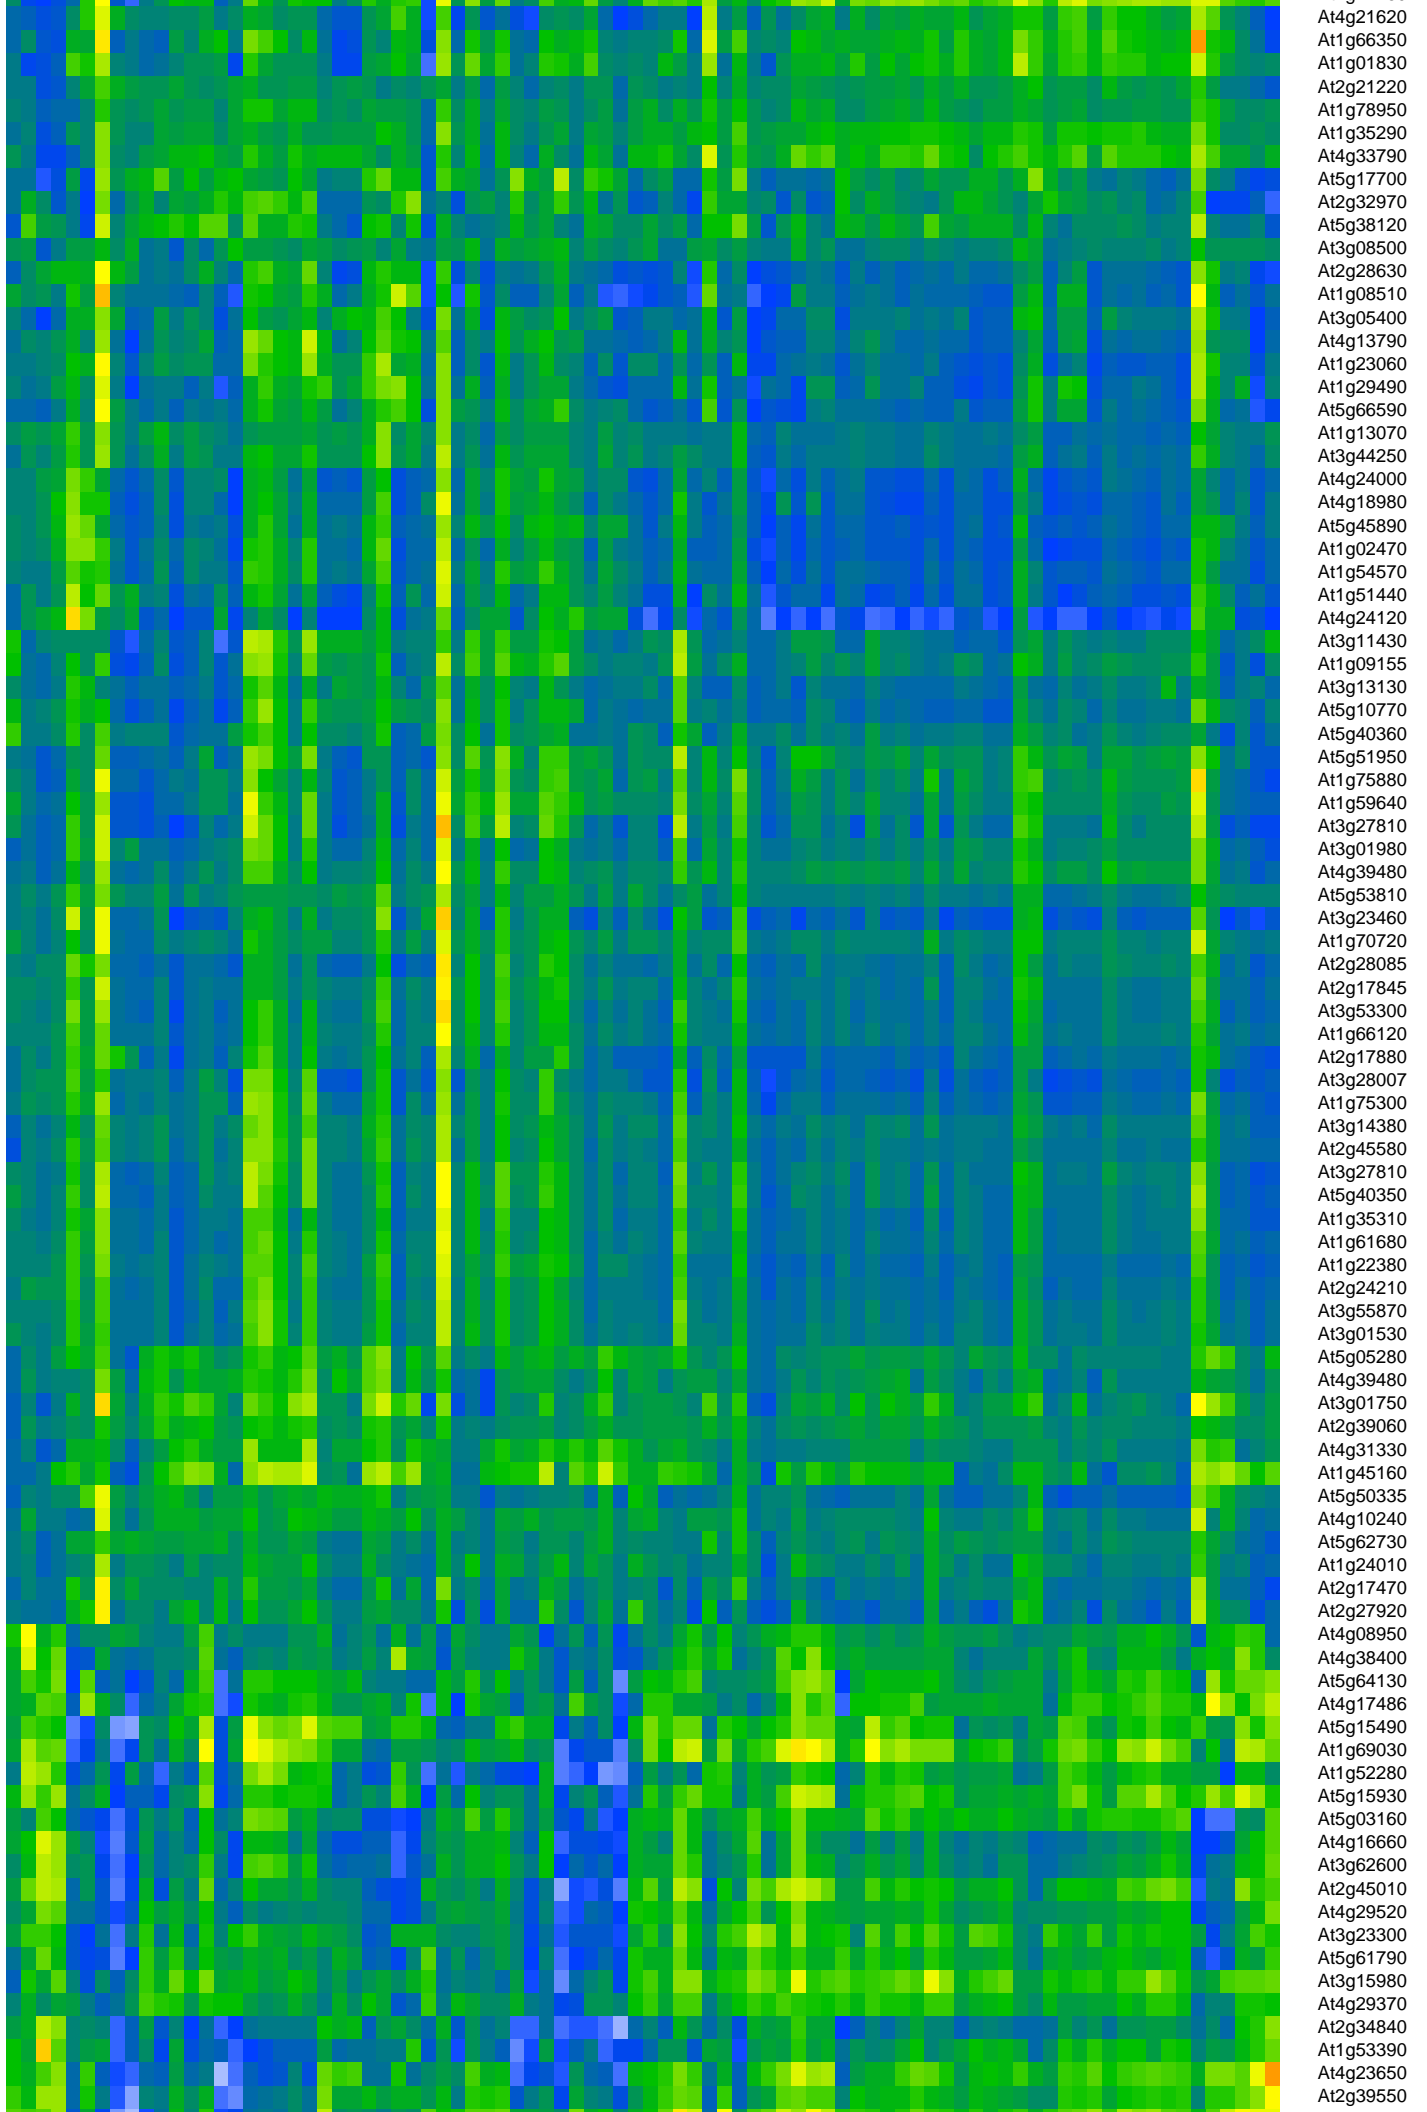

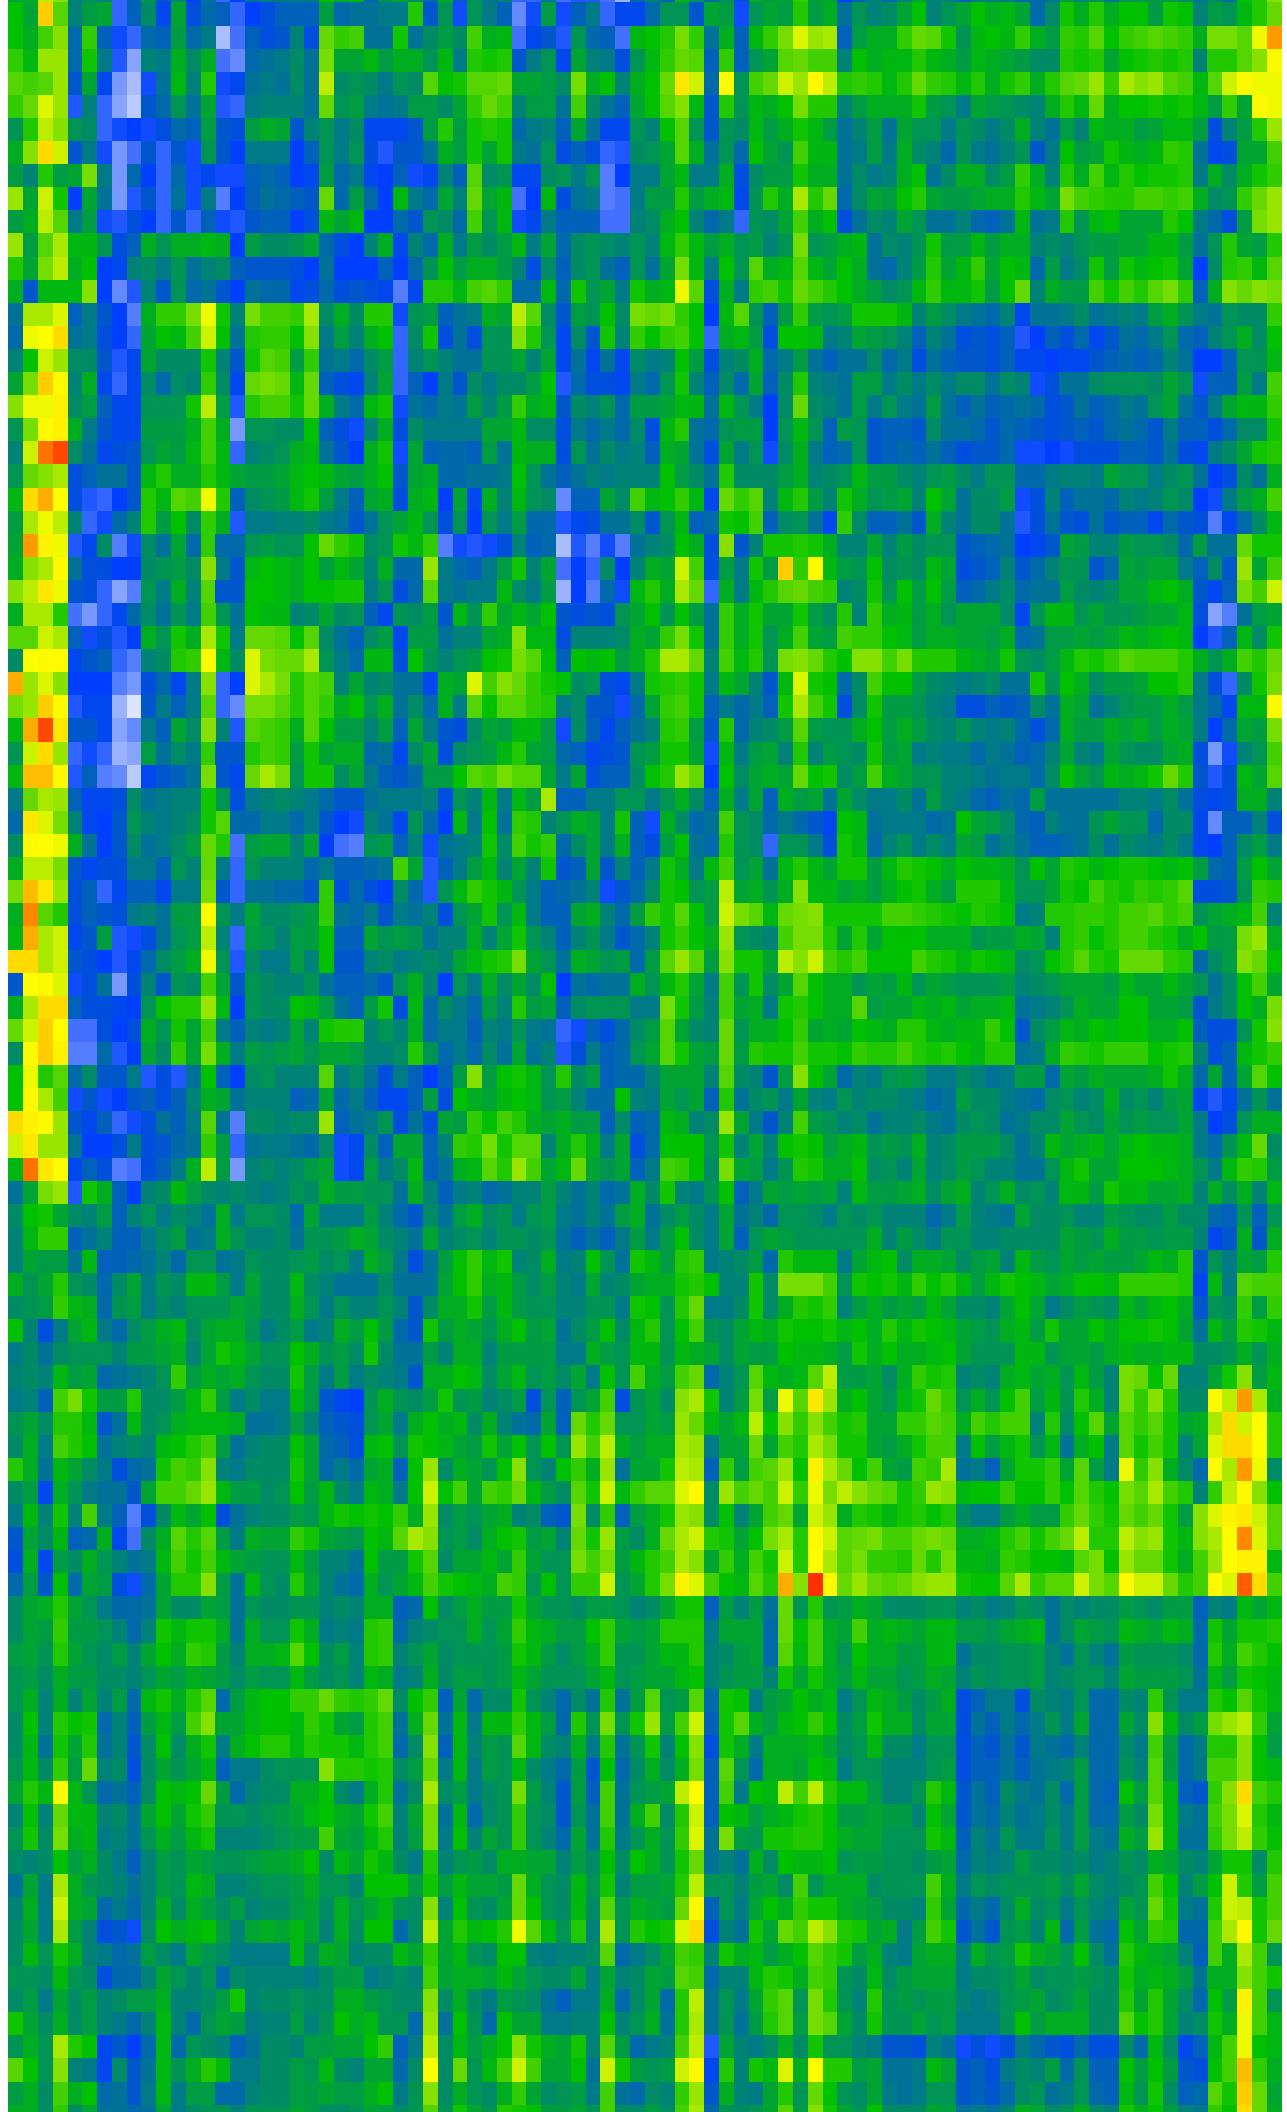

At1g53390  
At4g23650  
At2g39550  
At5g25170  
At1g28390  
At3g06350  
At5g47420  
At5g44720  
At3g14840  
At5g58140  
At1g02450  
At4g01370  
At3g28480  
At3g48570  
At3g48570  
At1g14360  
At4g17720  
At1g72280  
At5g02490  
At4g31980  
At5g65130  
At1g61640  
At3g09440  
At3g29360  
At5g15640  
At3g55410  
At1g11390  
At3g24090  
At4g39230  
At5g46910  
At5g54650  
At4g37640  
At2g34250  
At3g57550  
At1g32860  
At4g23060  
At1g67850  
At4g24960  
At4g12790  
At3g61640  
At2g17480  
At5g64310  
At3g25140  
At1g80450  
At1g53920  
At5g44370  
At5g01730  
At3g15200  
At1g73080  
At1g50460  
At3g60260  
At5g44210  
At2g18880  
At1g10420  
At3g27510  
At4g18490  
At4g04820  
At3g12520  
At2g12320  
At5g53240  
At5g20580  
At2g20850  
At5g50130  
At1g51000  
At1g69680  
At5g21105  
At2g07360  
At4g23720  
At2g01610  
At4g08000  
At4g03900  
At1g37160  
At4g03790  
At3g43110  
At1g17710  
At1g73010  
At1g08310  
At1g44130  
At2g11810  
At2g45130  
At1g60500  
At4g21730  
At3g55550  
At3g22940  
At4g08050  
At3g19530  
At2g07738  
At3g17190  
At3g05630  
At2g04040  
At1g19200  
At2g27777

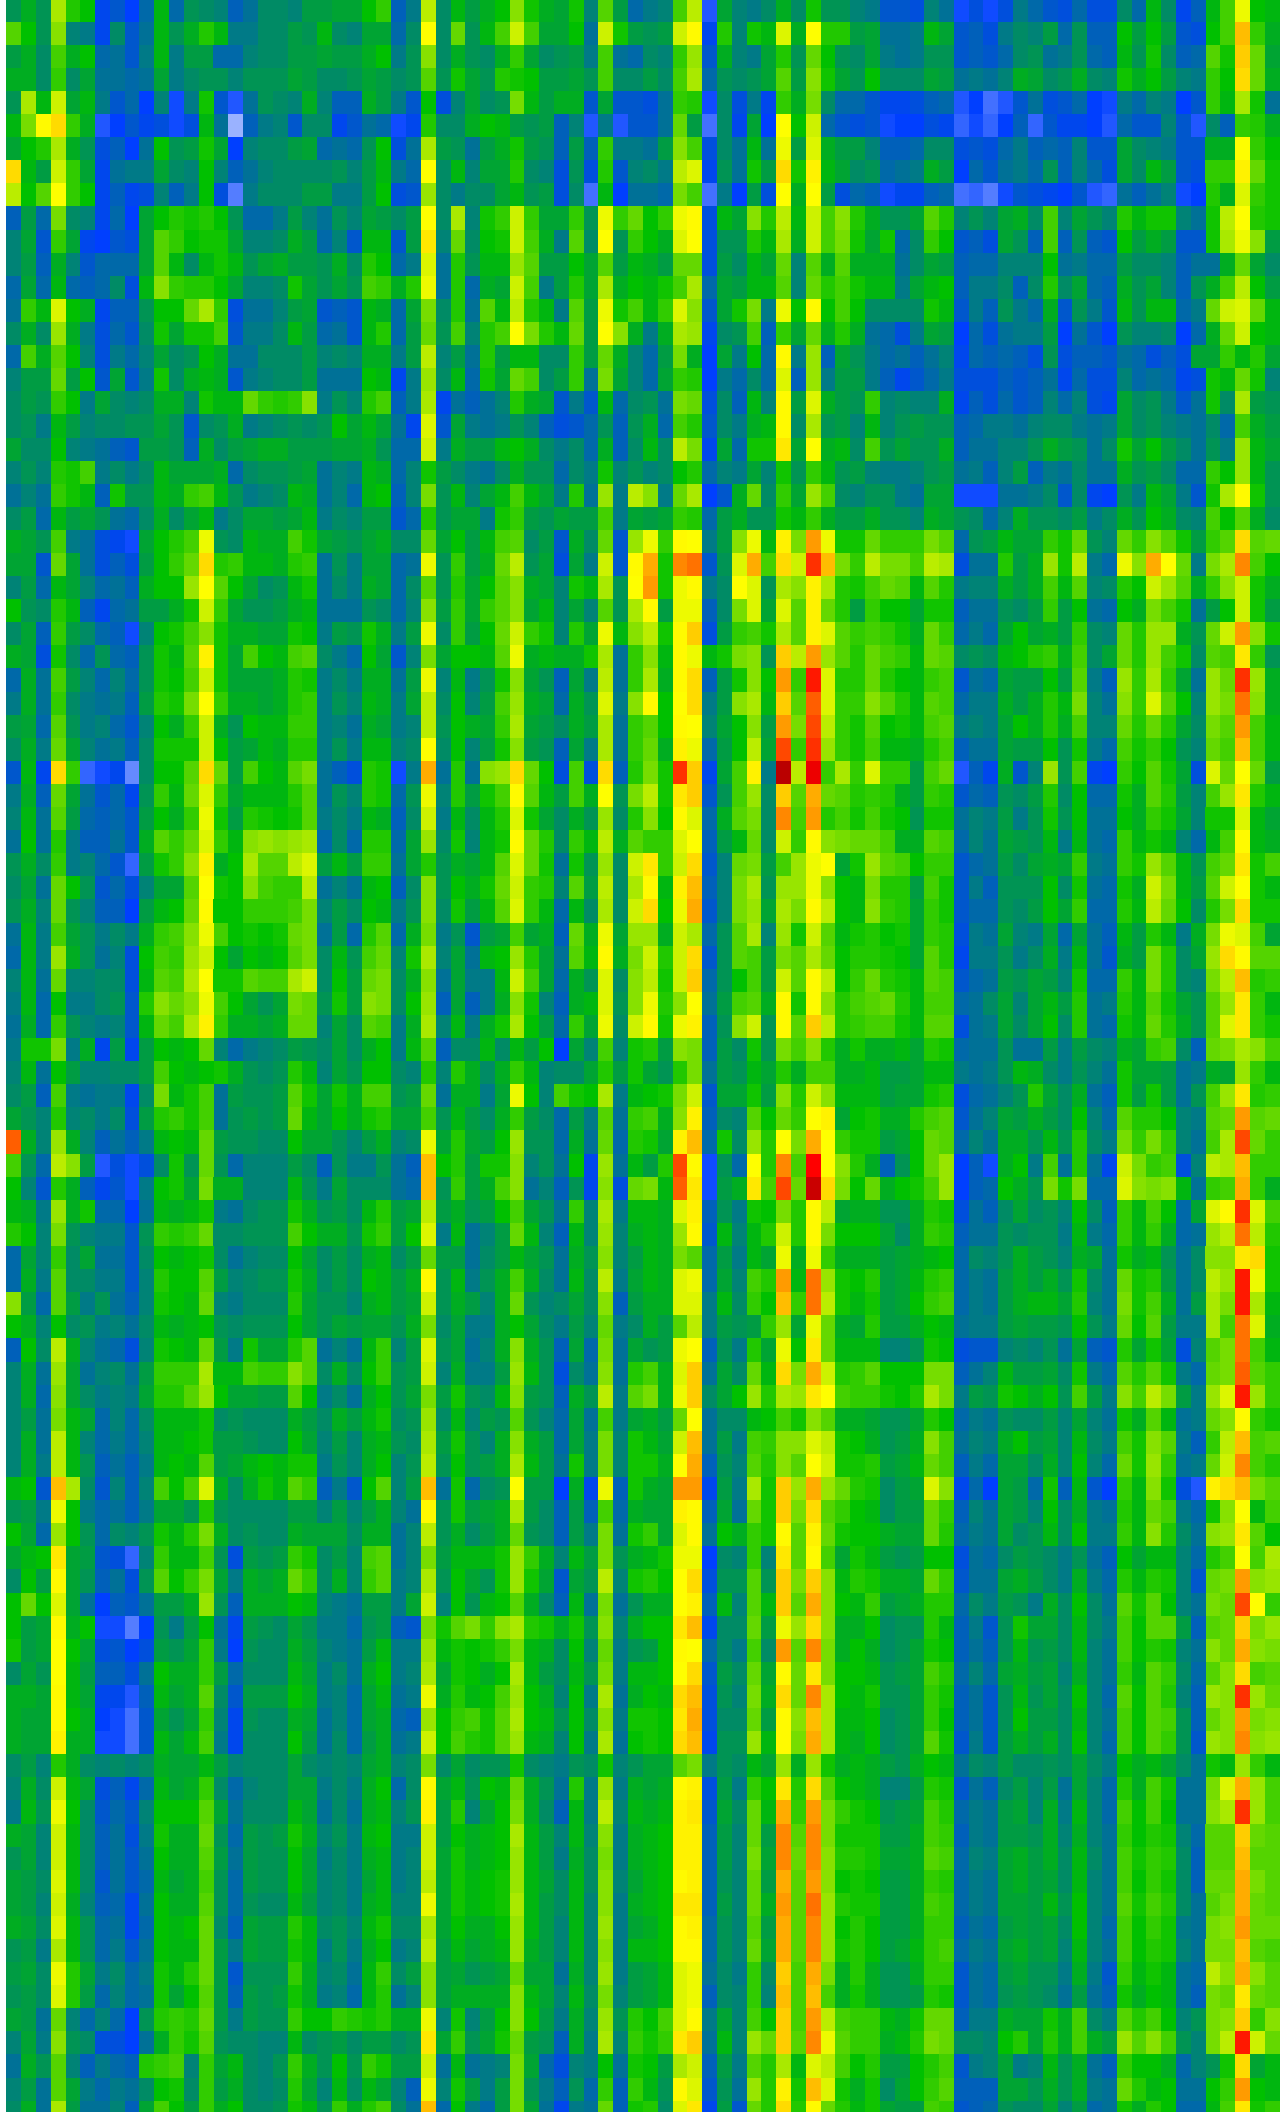

At3g05630  
At2g04040  
At1g19200  
At2g07777  
At3g45980  
At1g51280  
At5g05340  
At5g24660  
At5g17650  
At5g44170  
At4g03156  
At4g08430  
At5g03090  
At1g64105  
At5g43980  
At1g63040  
At1g19610  
At3g29610  
At5g28880  
At2g14730  
At2g44240  
At2g07140  
At4g29570  
At4g35370  
At3g20990  
At4g00390  
At2g25330  
At1g63540  
At5g56510  
At1g45100  
At1g22090  
At5g51480  
At1g66310  
At2g02660  
At1g63210  
At2g21510  
At3g09620  
At3g23060  
At2g16450  
At3g25080  
At3g27620  
At2g19610  
At2g43270  
At1g72270  
At3g61340  
At3g60980  
At4g05490  
At5g08360  
At5g07570  
At2g20800  
At3g48130  
At3g58210  
At5g06720  
At4g02170  
At3g27400  
At1g71380  
At1g60030  
At3g50610  
At1g68290  
At2g23480  
At5g61740  
At2g44460  
At4g02960  
At1g36920  
At1g75600  
At3g29220  
At1g13370  
At3g29210  
At3g30450  
At1g45180  
At2g02200  
At1g32840  
At2g04970  
At2g14140  
At3g47270  
At5g34895  
At4g05640  
At1g69880  
At2g03800  
At3g30440  
At2g02210  
At2g14130  
At2g15140  
At3g44500  
At3g32900  
At4g04010  
At2g04980  
At3g24540  
At2g28510  
At4g04590  
At5g40430  
At1g49690

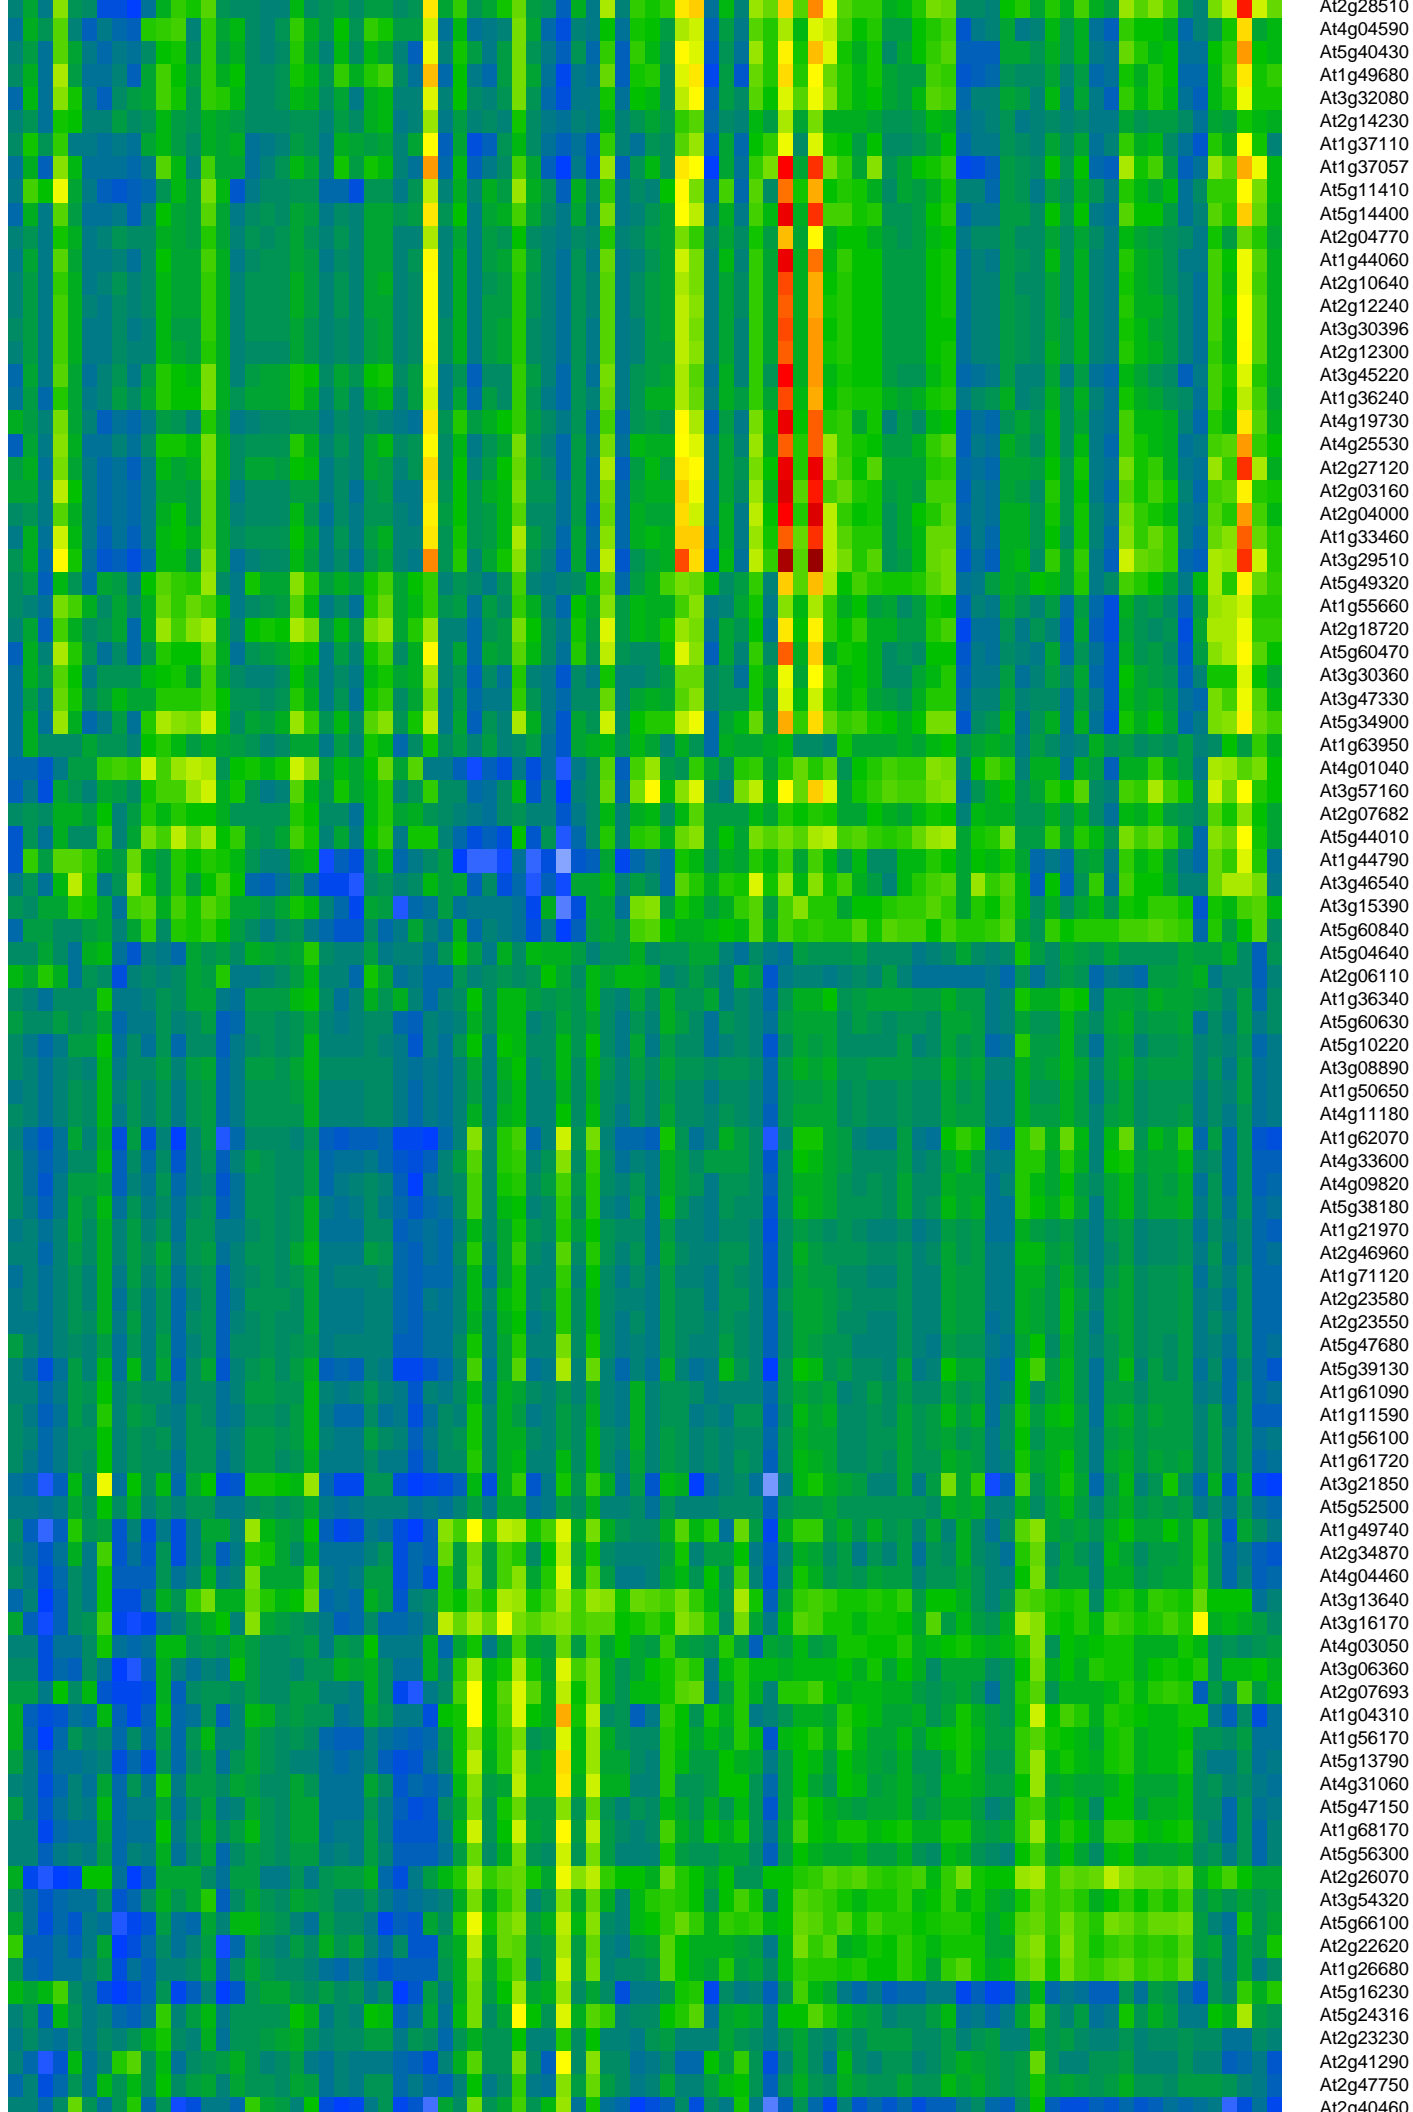

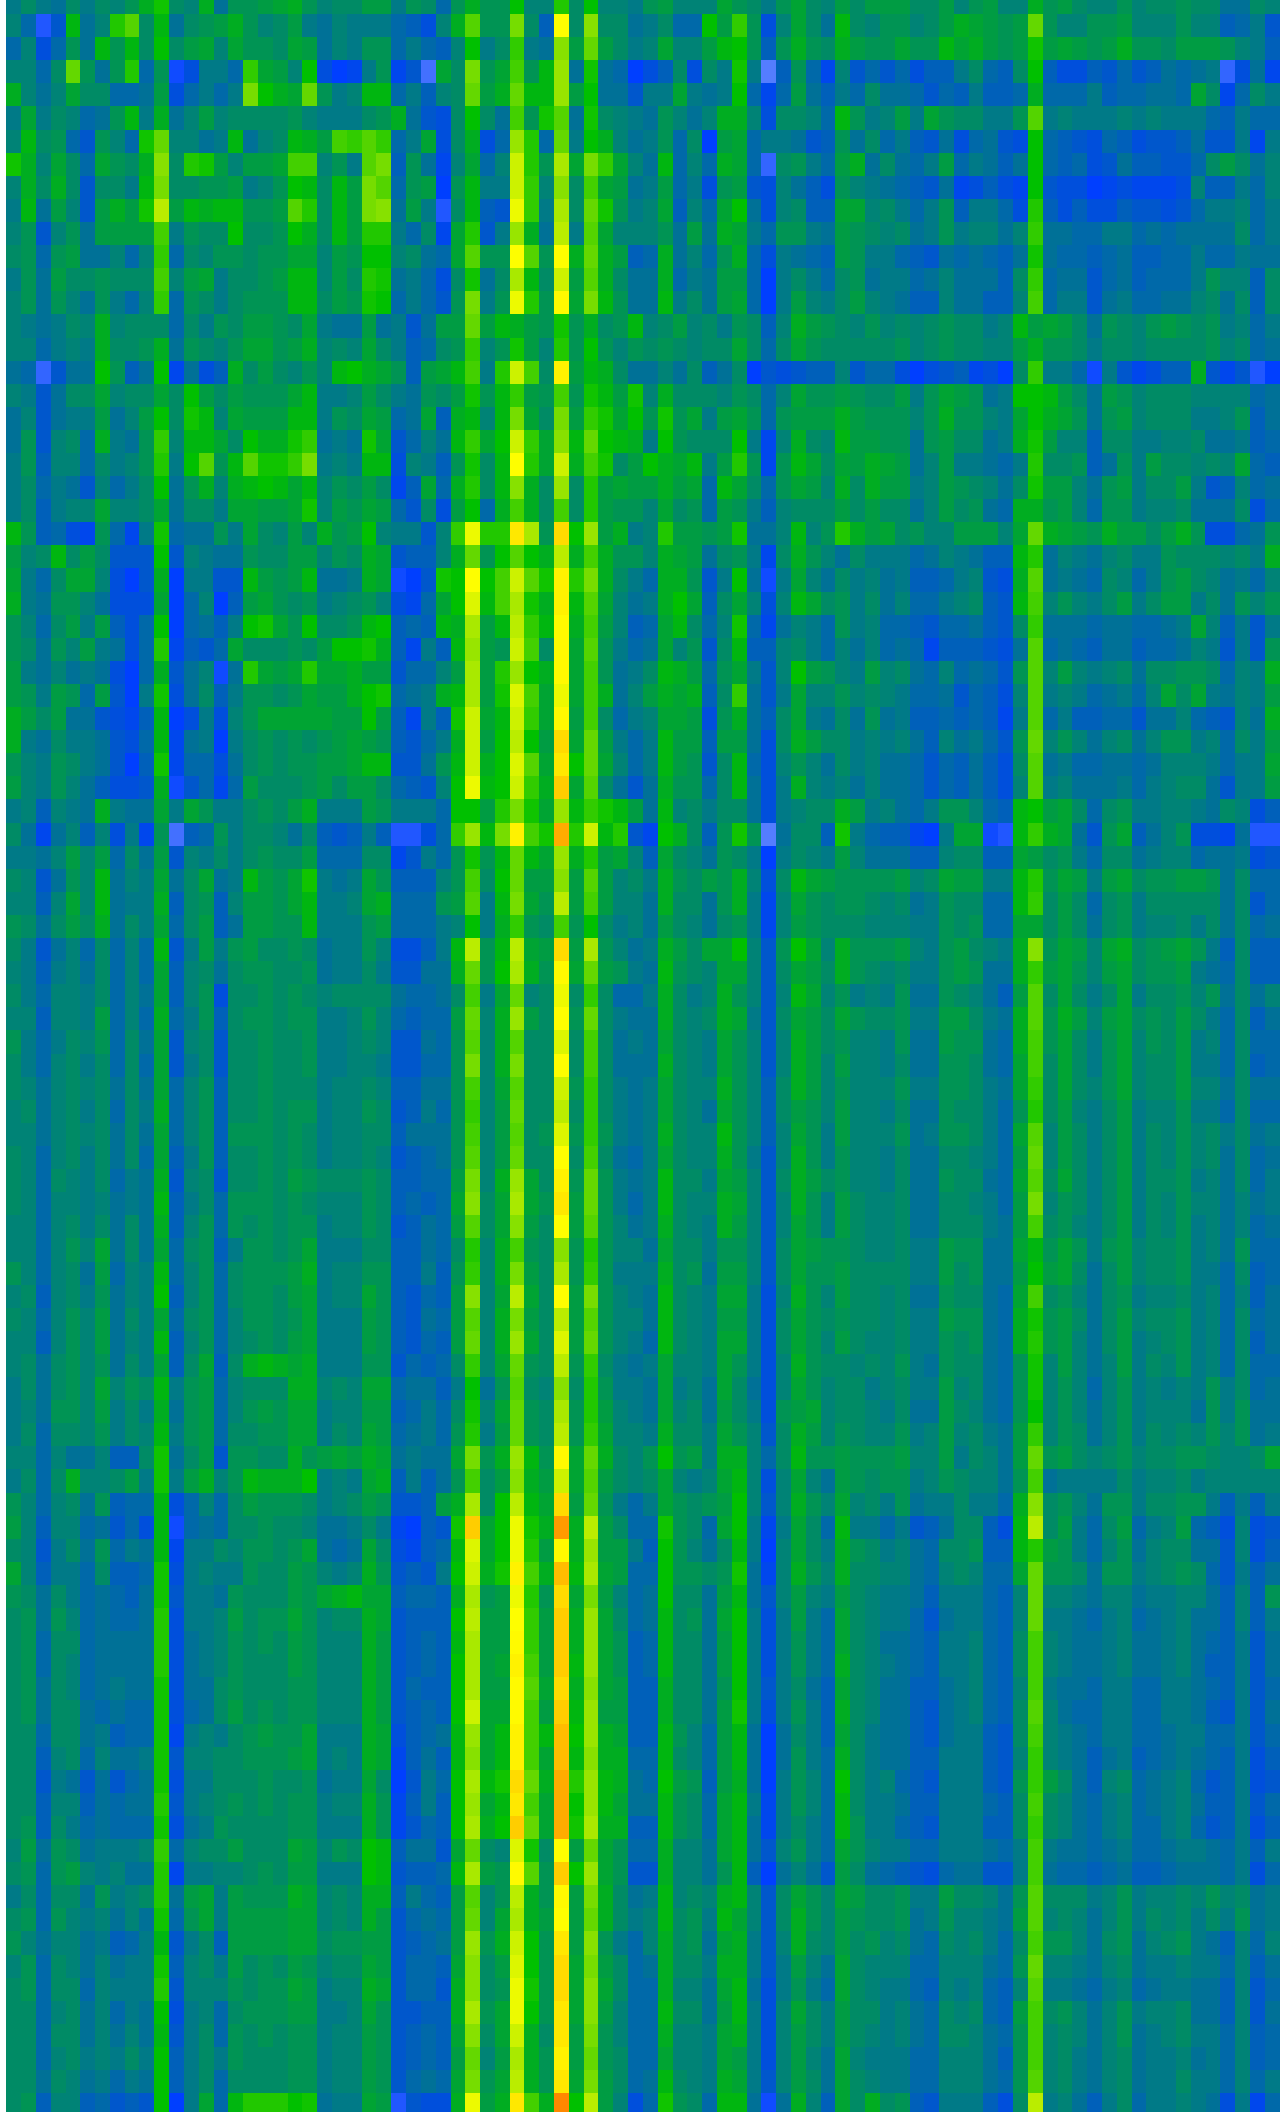

At2g23230  
At2g41290  
At2g47750  
At2g40460  
At2g18480  
At3g17130  
At1g73000  
At4g37360  
At3g29260  
At3g04150  
At1g76290  
At5g04380  
At3g14630  
At5g15000  
At1g31250  
At4g35725  
At5g47550  
At3g20210  
At1g68510  
At4g26590  
At3g25160  
At1g80330  
At2g36760  
At3g12920  
At4g15870  
At3g52780  
At5g50260  
At4g18425  
At1g76230  
At3g53510  
At4g34320  
At5g57400  
At2g25940  
At2g05910  
At2g44260  
At1g71250  
At1g78390  
At2g23260  
At5g59845  
At5g26120  
At1g23200  
At2g23510  
At1g04660  
At1g73290  
At2g34700  
At5g07260  
At1g25410  
At3g12203  
At3g58740  
At1g62210  
At1g65880  
At5g51490  
At1g31670  
At5g49190  
At5g50750  
At1g20500  
At5g38195  
At5g38170  
At5g38160  
At3g11180  
At1g04380  
At5g08460  
At2g44470  
At5g20860  
At3g29190  
At1g05450  
At3g24220  
At2g38900  
At4g37050  
At1g19900  
At1g65670  
At3g62730  
At5g07190  
At5g45830  
At3g60730  
At1g11170  
At3g26790  
At5g44360  
At5g09640  
At3g63040  
At3g04170  
At5g64190  
At4g25980  
At1g25270  
At1g77240  
At1g78500  
At1g68380  
At5g48100  
At4g34520  
At5g07500  
At3g44460  
At2g47120

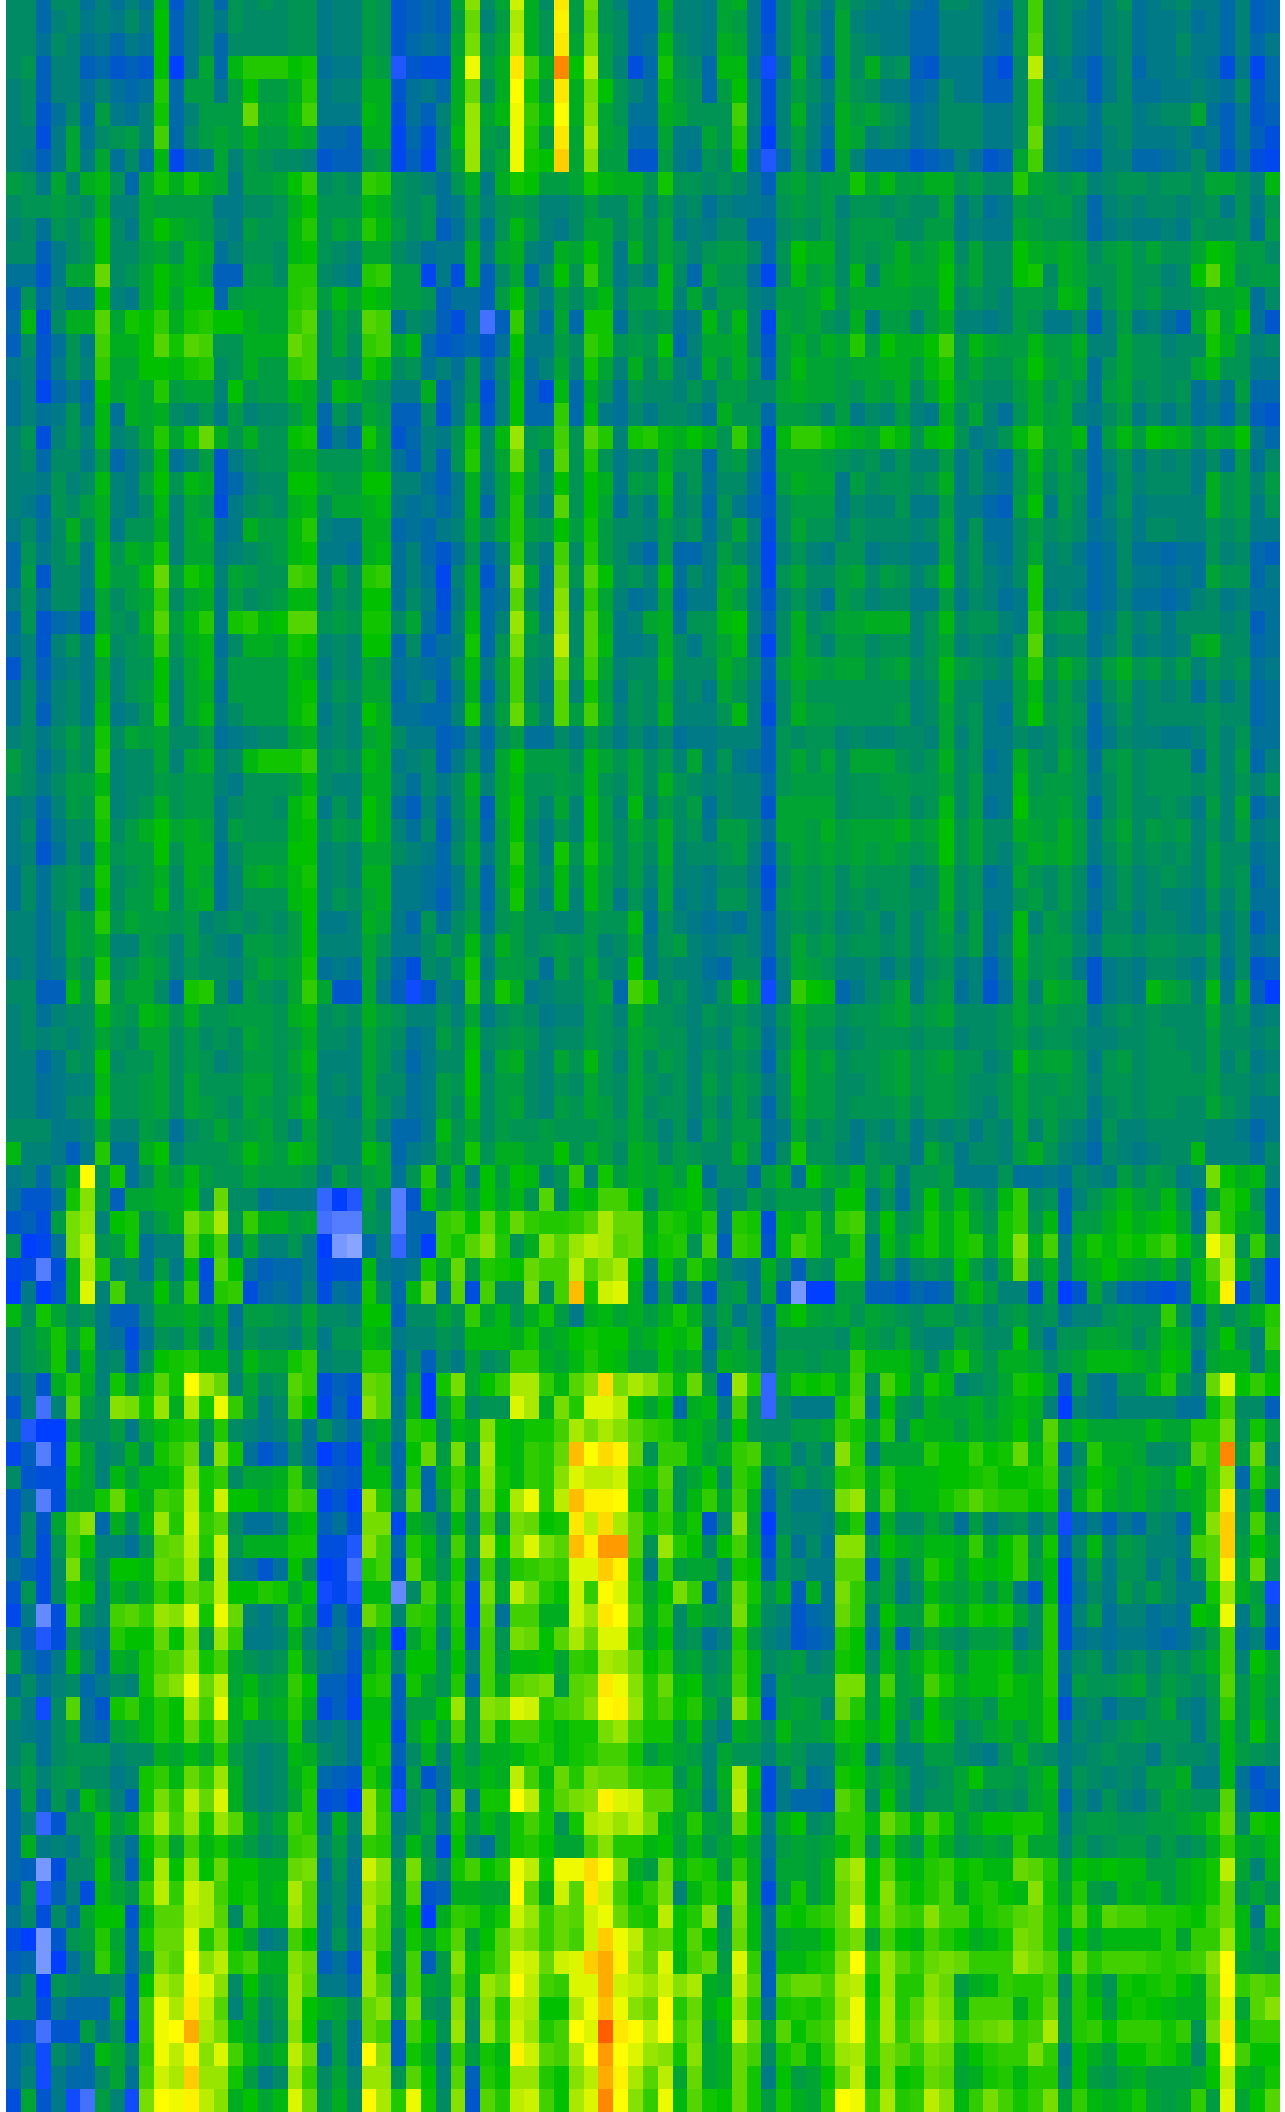

At4g04220  
At5g07500  
At3g44460  
At2g47120  
At1g09380  
At4g10850  
At5g20940  
At1g01250  
At1g64130  
At2g32370  
At2g36710  
At1g71691  
At5g65710  
At5g45770  
At1g12550  
At5g12460  
At5g13670  
At1g71890  
At3g27785  
At5g25470  
At2g28650  
At5g57920  
At1g28590  
At3g10590  
At3g27785  
At2g42860  
At3g04200  
At2g01770  
At1g27040  
At1g71691  
At5g22810  
At1g43640  
At1g09550  
At2g14690  
At3g50990  
At3g21830  
At2g15325  
At3g24250  
At3g21840  
At2g25540  
At3g13370  
At1g49800  
At4g03930  
At1g09370  
At2g02515  
At2g30810  
At4g15750  
At5g47350  
At5g09370  
At4g11510  
At5g46540  
At1g58025  
At5g08380  
At3g11745  
At4g19350  
At3g10850  
At1g56200  
At2g41450  
At1g42650  
At4g15320  
At1g35470  
At1g54110  
At1g73400  
At3g15380  
At5g51080  
At5g05800  
At5g66360  
At5g54080  
At2g01440  
At5g19030  
At1g78010  
At3g22450  
At1g06440  
At5g09950  
At1g28560  
At4g19220  
At3g15930  
At5g35420  
At1g24210  
At5g02650  
At2g15550  
At5g27650  
At5g52230  
At3g03880  
At5g49060  
At2g25920  
At4g15720  
At5g19830  
At4g28820  
At5g46400  
At1g68930  
At1g30970



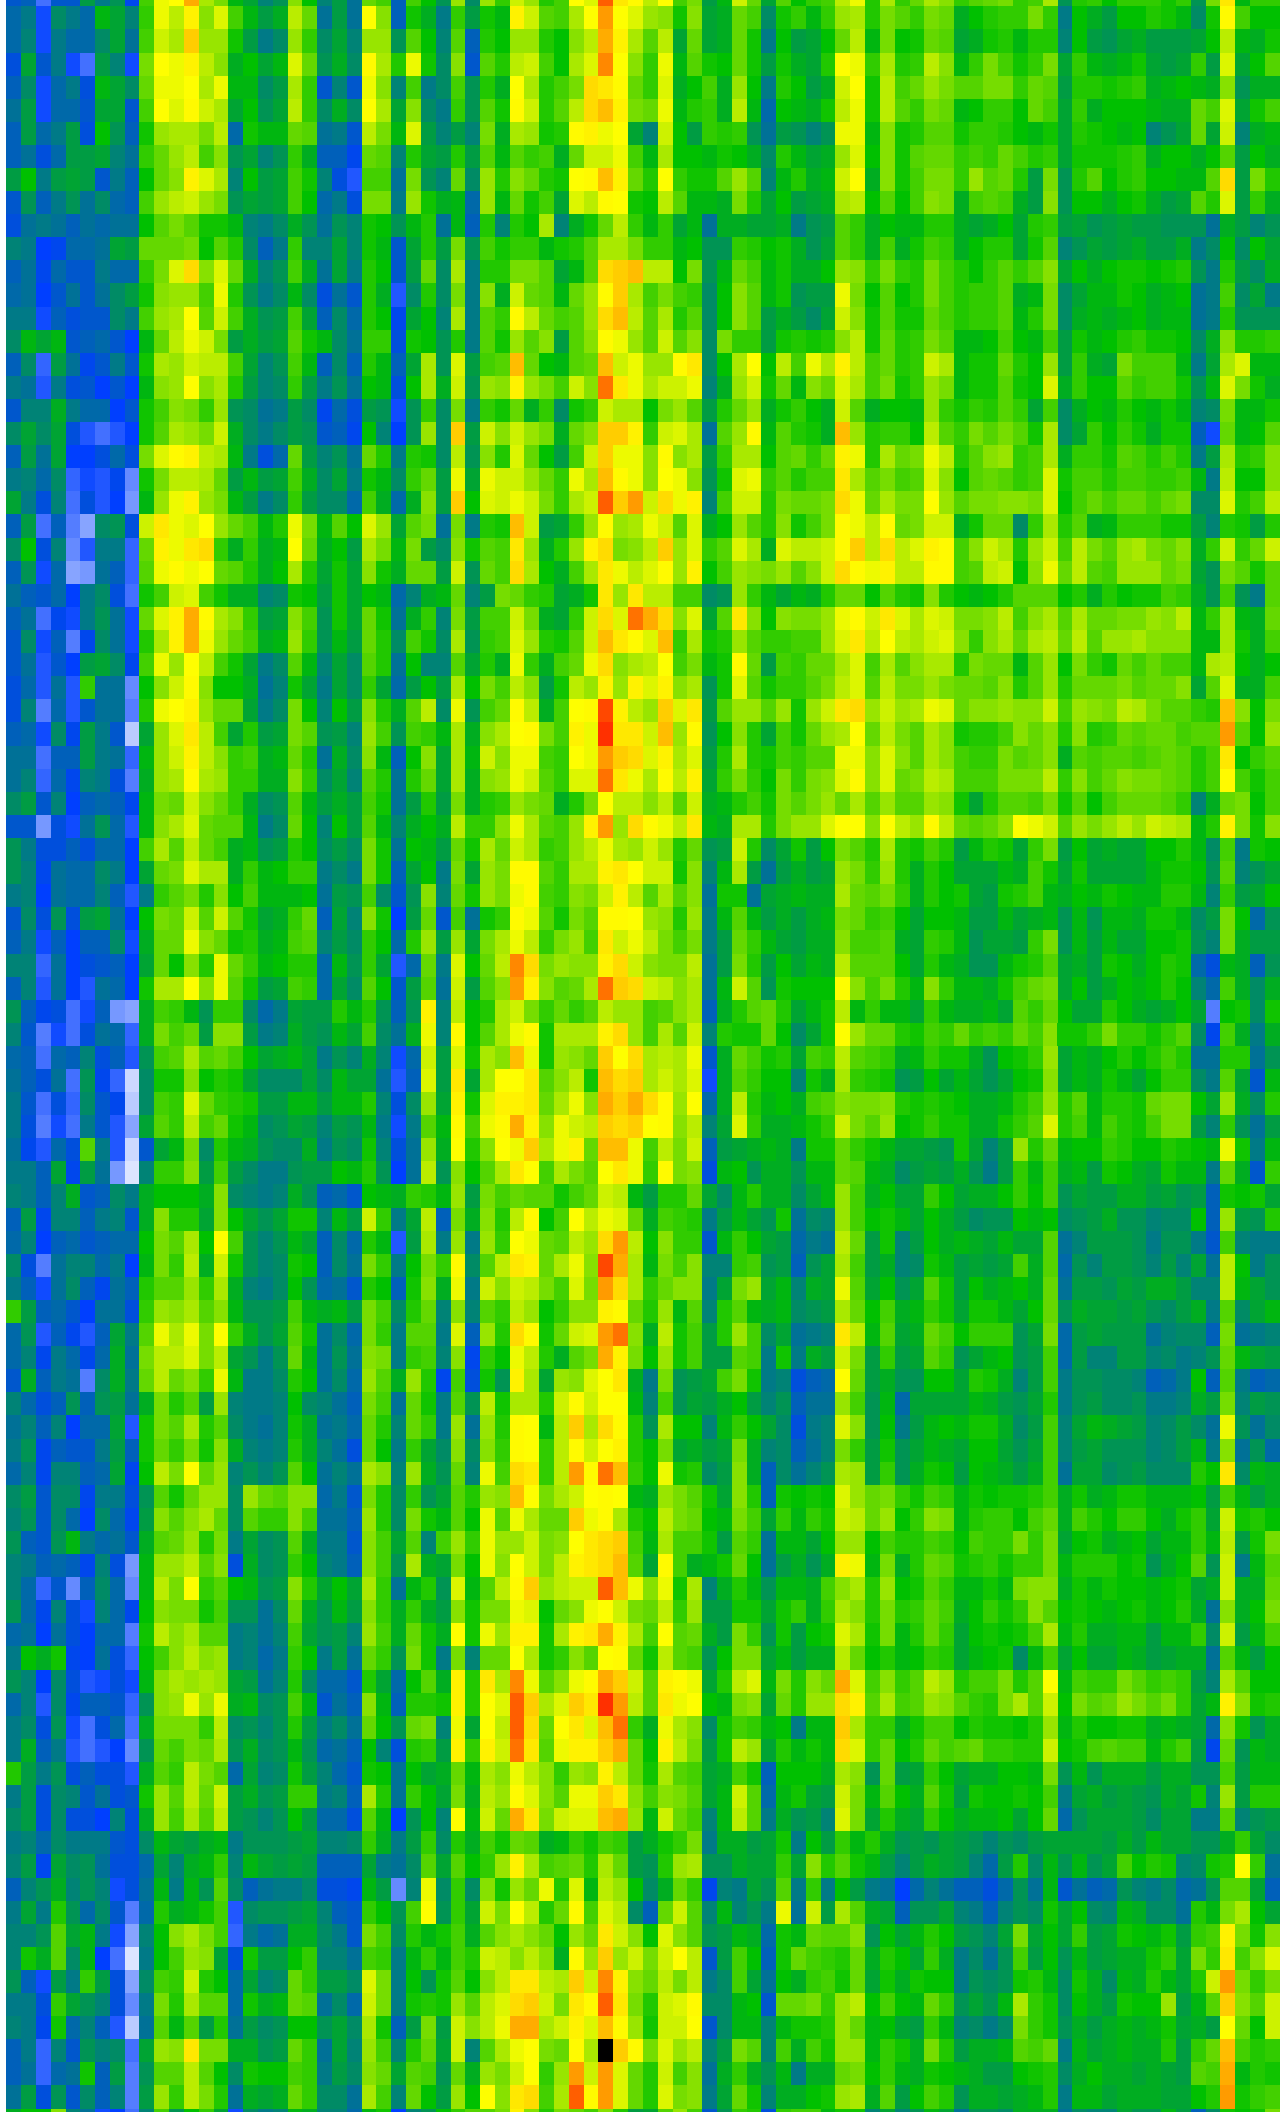

At5g46400  
At1g68930  
At1g30970  
At1g27070  
At5g05350  
At4g15180  
At5g08510  
At4g00850  
At5g16420  
At5g61360  
At1g33350  
At2g01510  
At1g08070  
At5g08310  
At5g39680  
At2g02880  
At2g15630  
At5g07340  
At4g23540  
At5g06810  
At1g55820  
At5g22830  
At4g25540  
At1g15720  
At5g26680  
At1g16470  
At3g26360  
At3g25970  
At3g52420  
At3g12650  
At4g03120  
At4g24880  
At4g22280  
At3g16610  
At1g52640  
At4g12640  
At3g26930  
At1g10110  
At4g31570  
At5g43680  
At5g46640  
At4g14850  
At5g10630  
At3g51050  
At1g73840  
At4g03240  
At3g15660  
At4g17510  
At1g17510  
At3g51610  
At4g18800  
At5g08440  
At4g24680  
At3g11460  
At1g79810  
At4g32050  
At1g22830  
At1g78930  
At1g65080  
At3g26990  
At2g41020  
At1g09520  
At2g43930  
At2g35540  
At3g61740  
At5g53150  
At4g20060  
At3g44530  
At4g10890  
At4g38180  
At4g38170  
At1g04930  
At2g01735  
At5g18770  
At5g47400  
At4g17060  
At1g62720  
At1g62130  
At1g80245  
At2g07736  
At5g22460  
At2g22450  
At5g25270  
At5g11030  
At1g78800  
At3g17365  
At5g15540  
At5g23110  
At1g66750  
At5g18200  
At5g41270

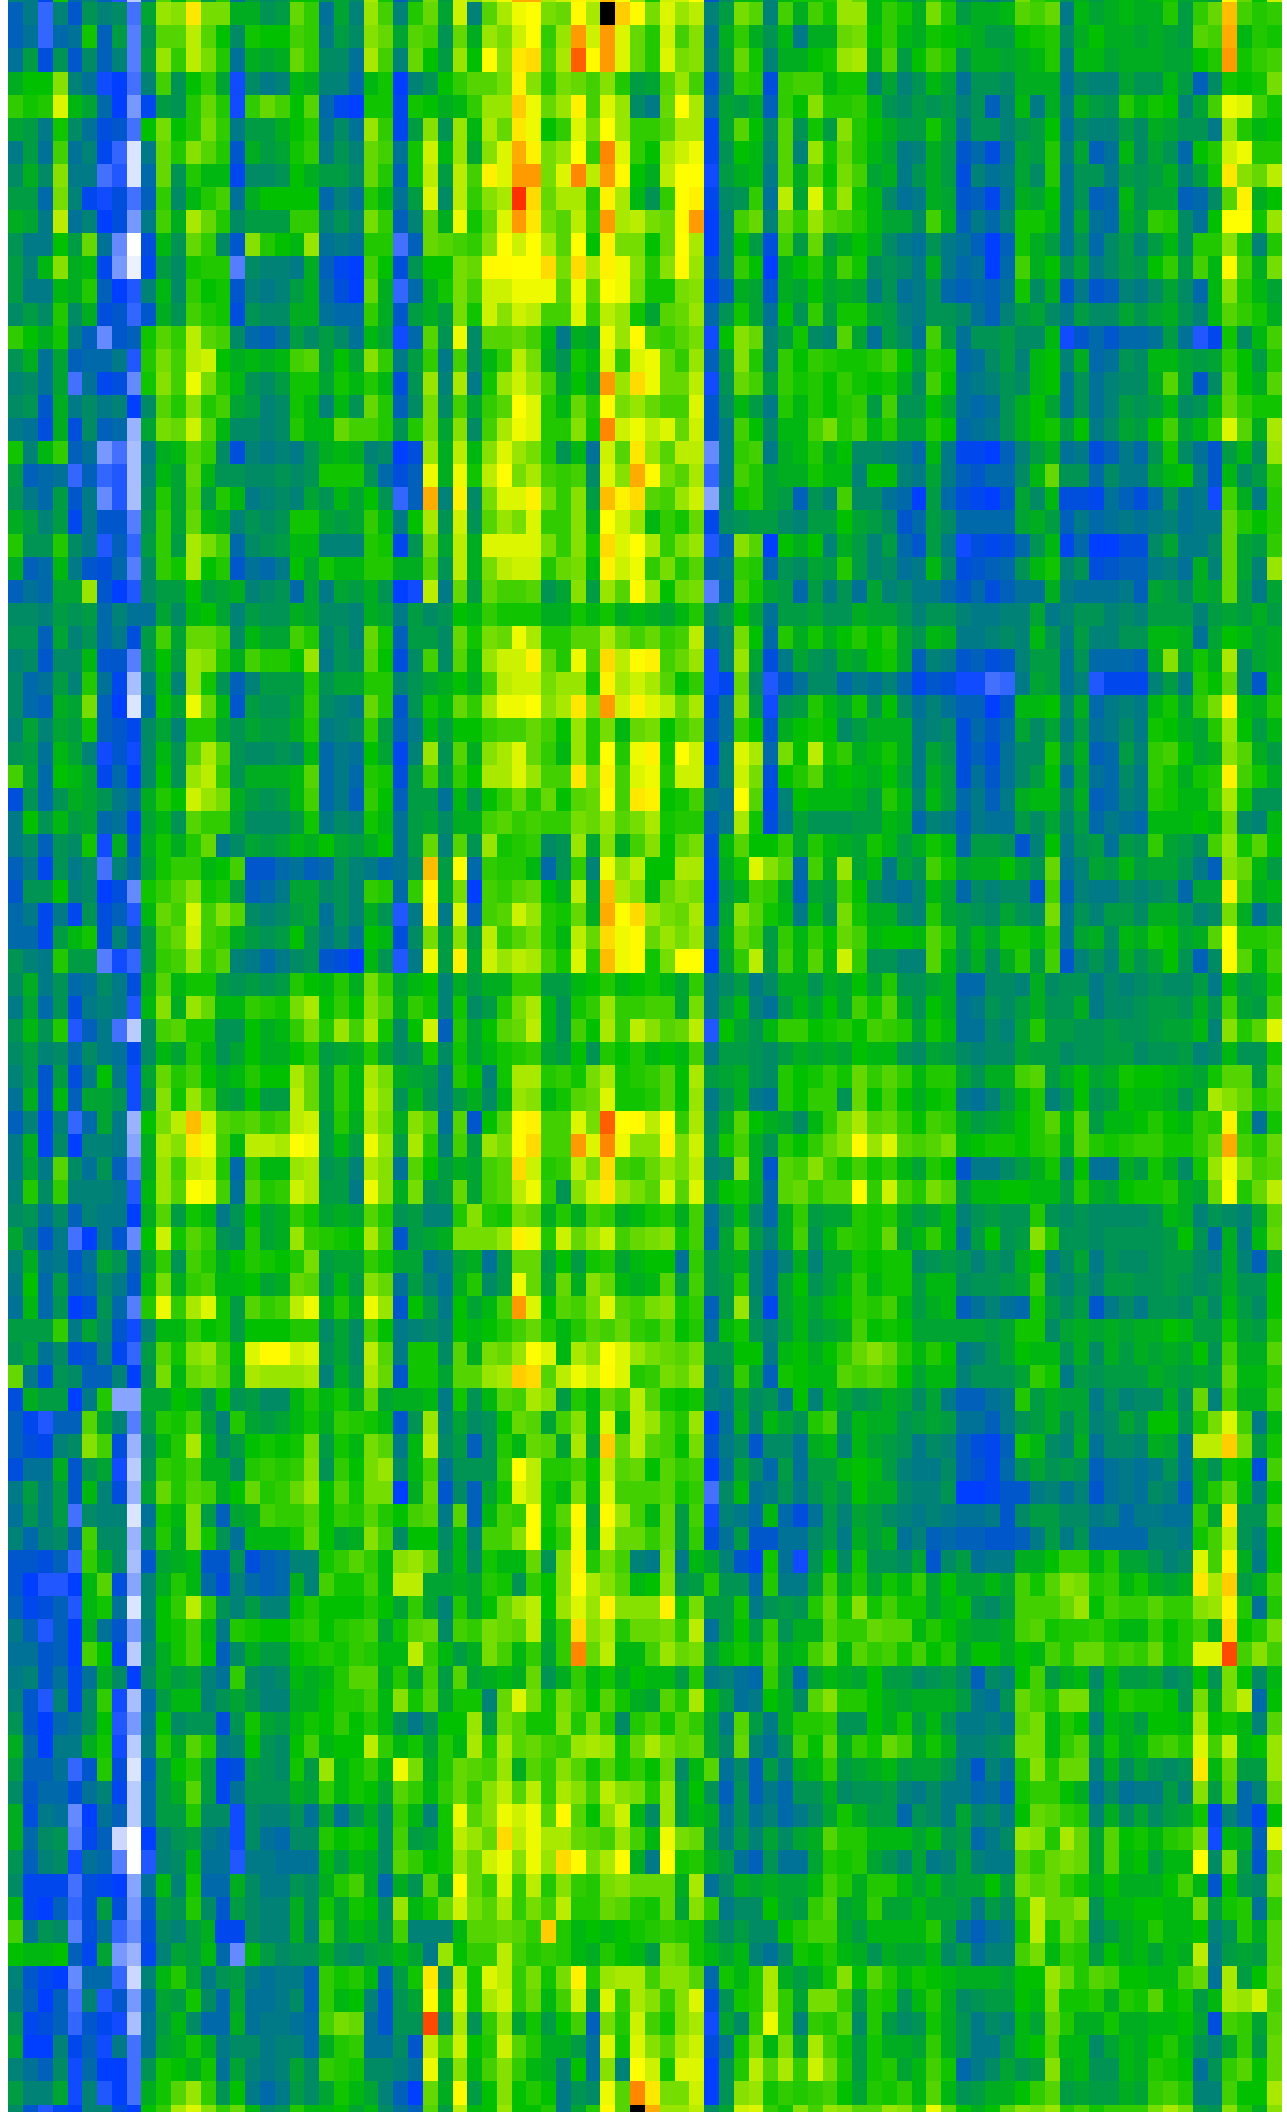

At1g966750  
At5g18200  
At5g41270  
At2g21470  
At2g03470  
At3g47850  
At1g44960  
At2g44980  
At2g47330  
At1g48970  
At2g39725  
At2g12550  
At3g58530  
At2g07678  
At2g35720  
At1g47920  
At1g62720  
At2g16670  
At5g20880  
At5g55200  
At3g15357  
At5g62050  
At3g03660  
At1g50400  
At4g33650  
At3g62450  
At2g07731  
At2g07719  
At2g18600  
At3g23605  
At3g60640  
At3g22700  
At3g18610  
At5g63750  
At1g77850  
At4g35820  
At5g57650  
At3g58180  
At5g60590  
At2g20390  
At3g45880  
At4g02220  
At5g63390  
At4g03370  
At1g55620  
At4g08420  
At2g07682  
At2g07686  
At5g19910  
At5g05130  
At2g03810  
At3g13445  
At3g61720  
At4g33800  
At4g04050  
At2g27240  
At5g48950  
At4g10410  
At1g03960  
At1g04910  
At2g44525  
At4g35220  
At1g80950  
At5g52980  
At2g23310  
At1g20890  
At3g18215  
At1g22790  
At5g09310  
At5g65950  
At5g62930  
At2g46990  
At2g21410  
At2g38180  
At2g32700  
At4g37890  
At3g60070  
At3g23560  
At2g30110  
At1g53910  
At4g34110  
At1g32090  
At5g57110  
At5g53760  
At5g60980  
At1g19600  
At4g01100  
At5g56090  
At1g64220  
At1g26340  
At5g28470

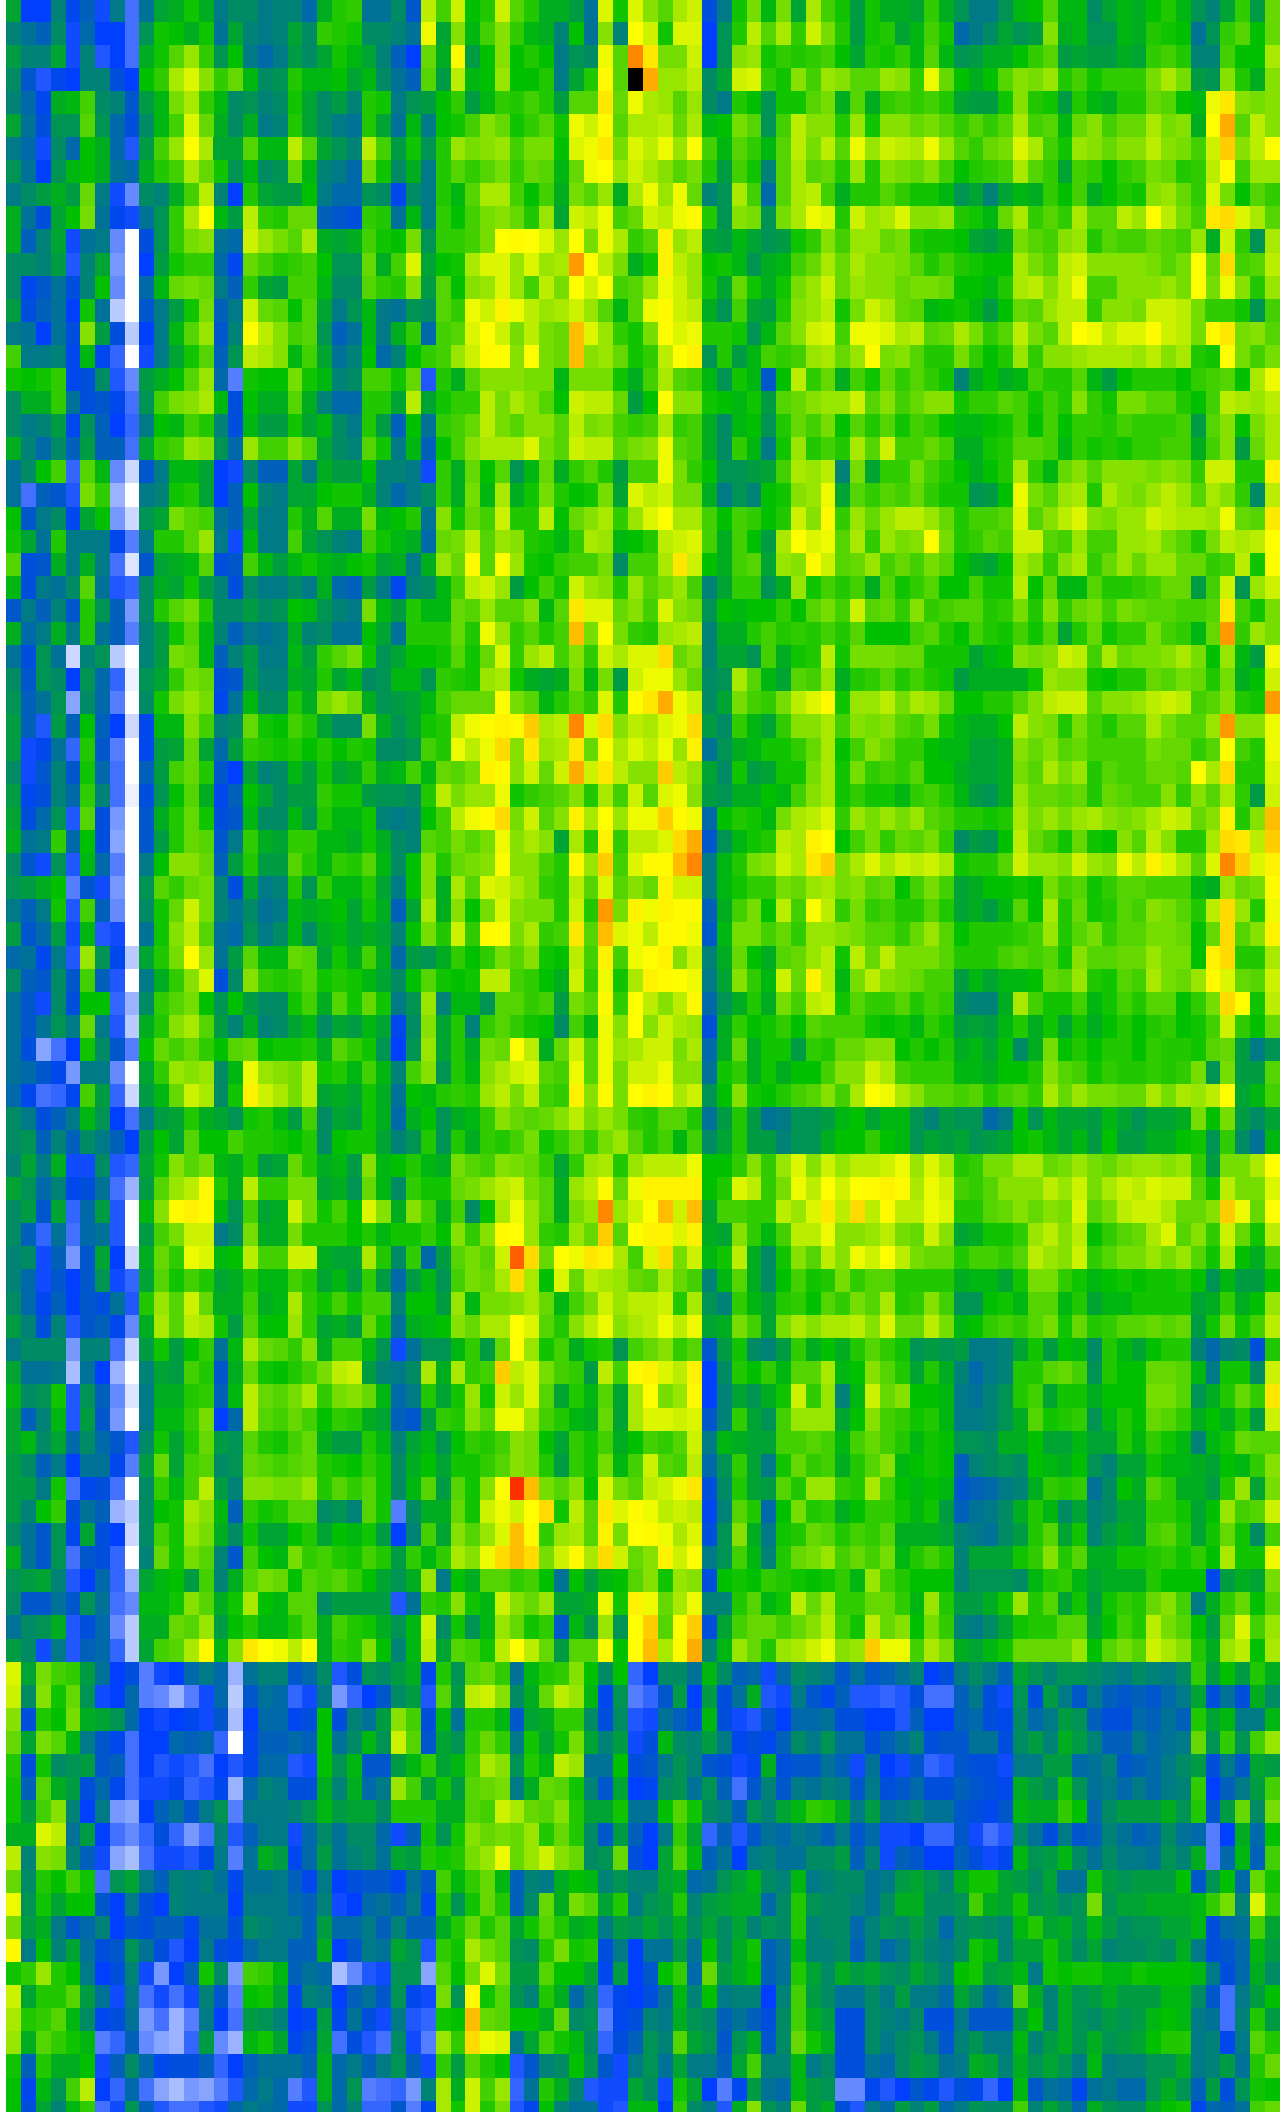

At5g56090  
At1g64220  
At1g26340  
At5g02470  
At5g54890  
At2g22390  
At2g17975  
At4g32560  
At1g73790  
At5g42370  
At3g25800  
At1g20760  
At5g23390  
At4g16444  
At4g27750  
At1g34150  
At5g24360  
At5g61910  
At3g45420  
At5g40820  
At1g04750  
At1g05720  
At3g12100  
At1g76380  
At4g38930  
At3g21640  
At5g37055  
At1g70150  
At4g12590  
At1g07960  
At3g04780  
At1g69220  
At4g36440  
At1g62880  
At5g26731  
At4g33100  
At1g51590  
At2g43420  
At2g38960  
At5g51510  
At5g63010  
At4g29735  
At1g48140  
At5g20660  
At1g52600  
At5g62575  
At3g20920  
At4g35980  
At1g10970  
At5g38750  
At5g16280  
At5g65560  
At2g43980  
At1g09870  
At5g63260  
At1g20540  
At4g33170  
At4g30870  
At3g07680  
At1g71780  
At5g05570  
At3g22845  
At2g07714  
At5g48690  
At4g02730  
At5g06830  
At3g62920  
At5g11870  
At4g25610  
At5g28220  
At1g05520  
At4g35890  
At3g62010  
At1g79000  
At1g01440  
At5g11700  
At3g16857  
At5g35980  
At2g01690  
At5g03730  
At5g19400  
At5g52870  
At5g44400  
At3g18670  
At2g13970  
At1g68370  
At3g14205  
At1g06410  
At1g66260  
At5g17890  
At2g27450  
At1g31910

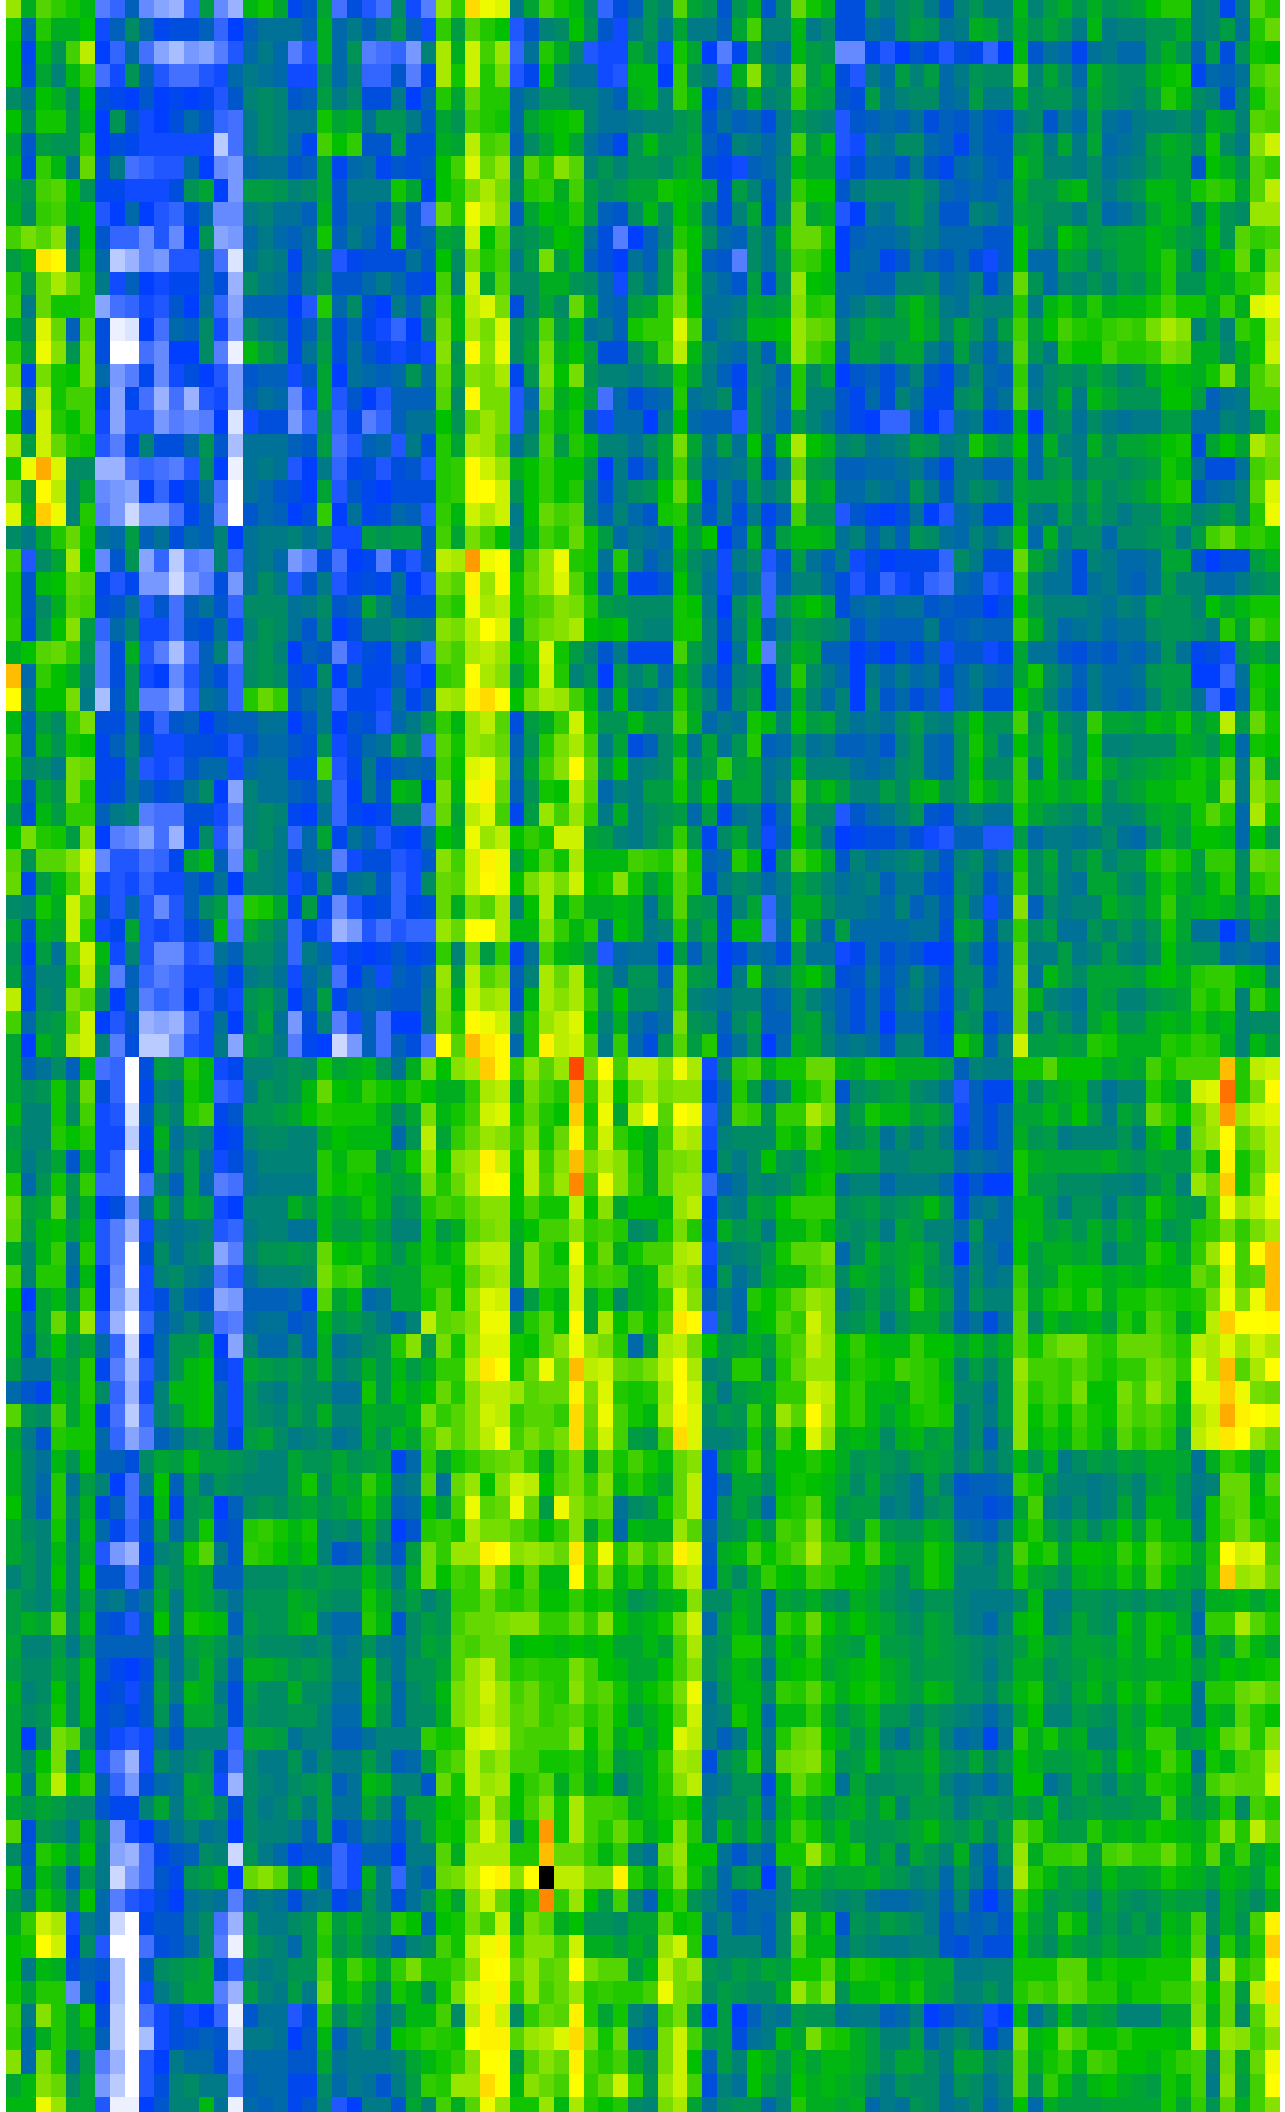

At1g66260  
At5g17890  
At2g27450  
At1g31910  
At4g00416  
At1g13610  
At1g78320  
At5g18170  
At4g34660  
At4g11830  
At3g24550  
At5g46630  
At3g49060  
At5g10290  
At4g25720  
At1g26690  
At2g36360  
At5g45260  
At4g11260  
At4g36150  
At2g32250  
At5g12480  
At5g03320  
At3g61010  
At2g26280  
At3g63330  
At2g32340  
At3g45630  
At2g42270  
At5g63320  
At5g60170  
At3g47010  
At4g08110  
At5g40910  
At3g58640  
At1g12120  
At3g01430  
At5g14710  
At3g24820  
At5g08170  
At2g27285  
At1g17160  
At4g16710  
At4g28640  
At4g16900  
At5g58200  
At5g05640  
At1g01640  
At2g41780  
At5g18840  
At3g23150  
At3g14610  
At5g49620  
At3g15990  
At1g20700  
At5g10520  
At1g52420  
At1g49820  
At2g22120  
At4g02700  
At2g44680  
At1g68360  
At5g24010  
At5g16160  
At1g48760  
At3g29810  
At3g10780  
At1g20270  
At3g29970  
At2g07701  
At2g07706  
At2g07749  
At2g07768  
At2g07676  
At2g07722  
At1g69670  
At5g36090  
At1g49710  
At1g32570  
At1g49560  
At1g20696  
At1g27630  
At5g61380  
At4g25360  
At5g40760  
At1g12470  
At2g23300  
At3g19770  
At2g26890  
At4g04920  
At3g04580  
At3g60800

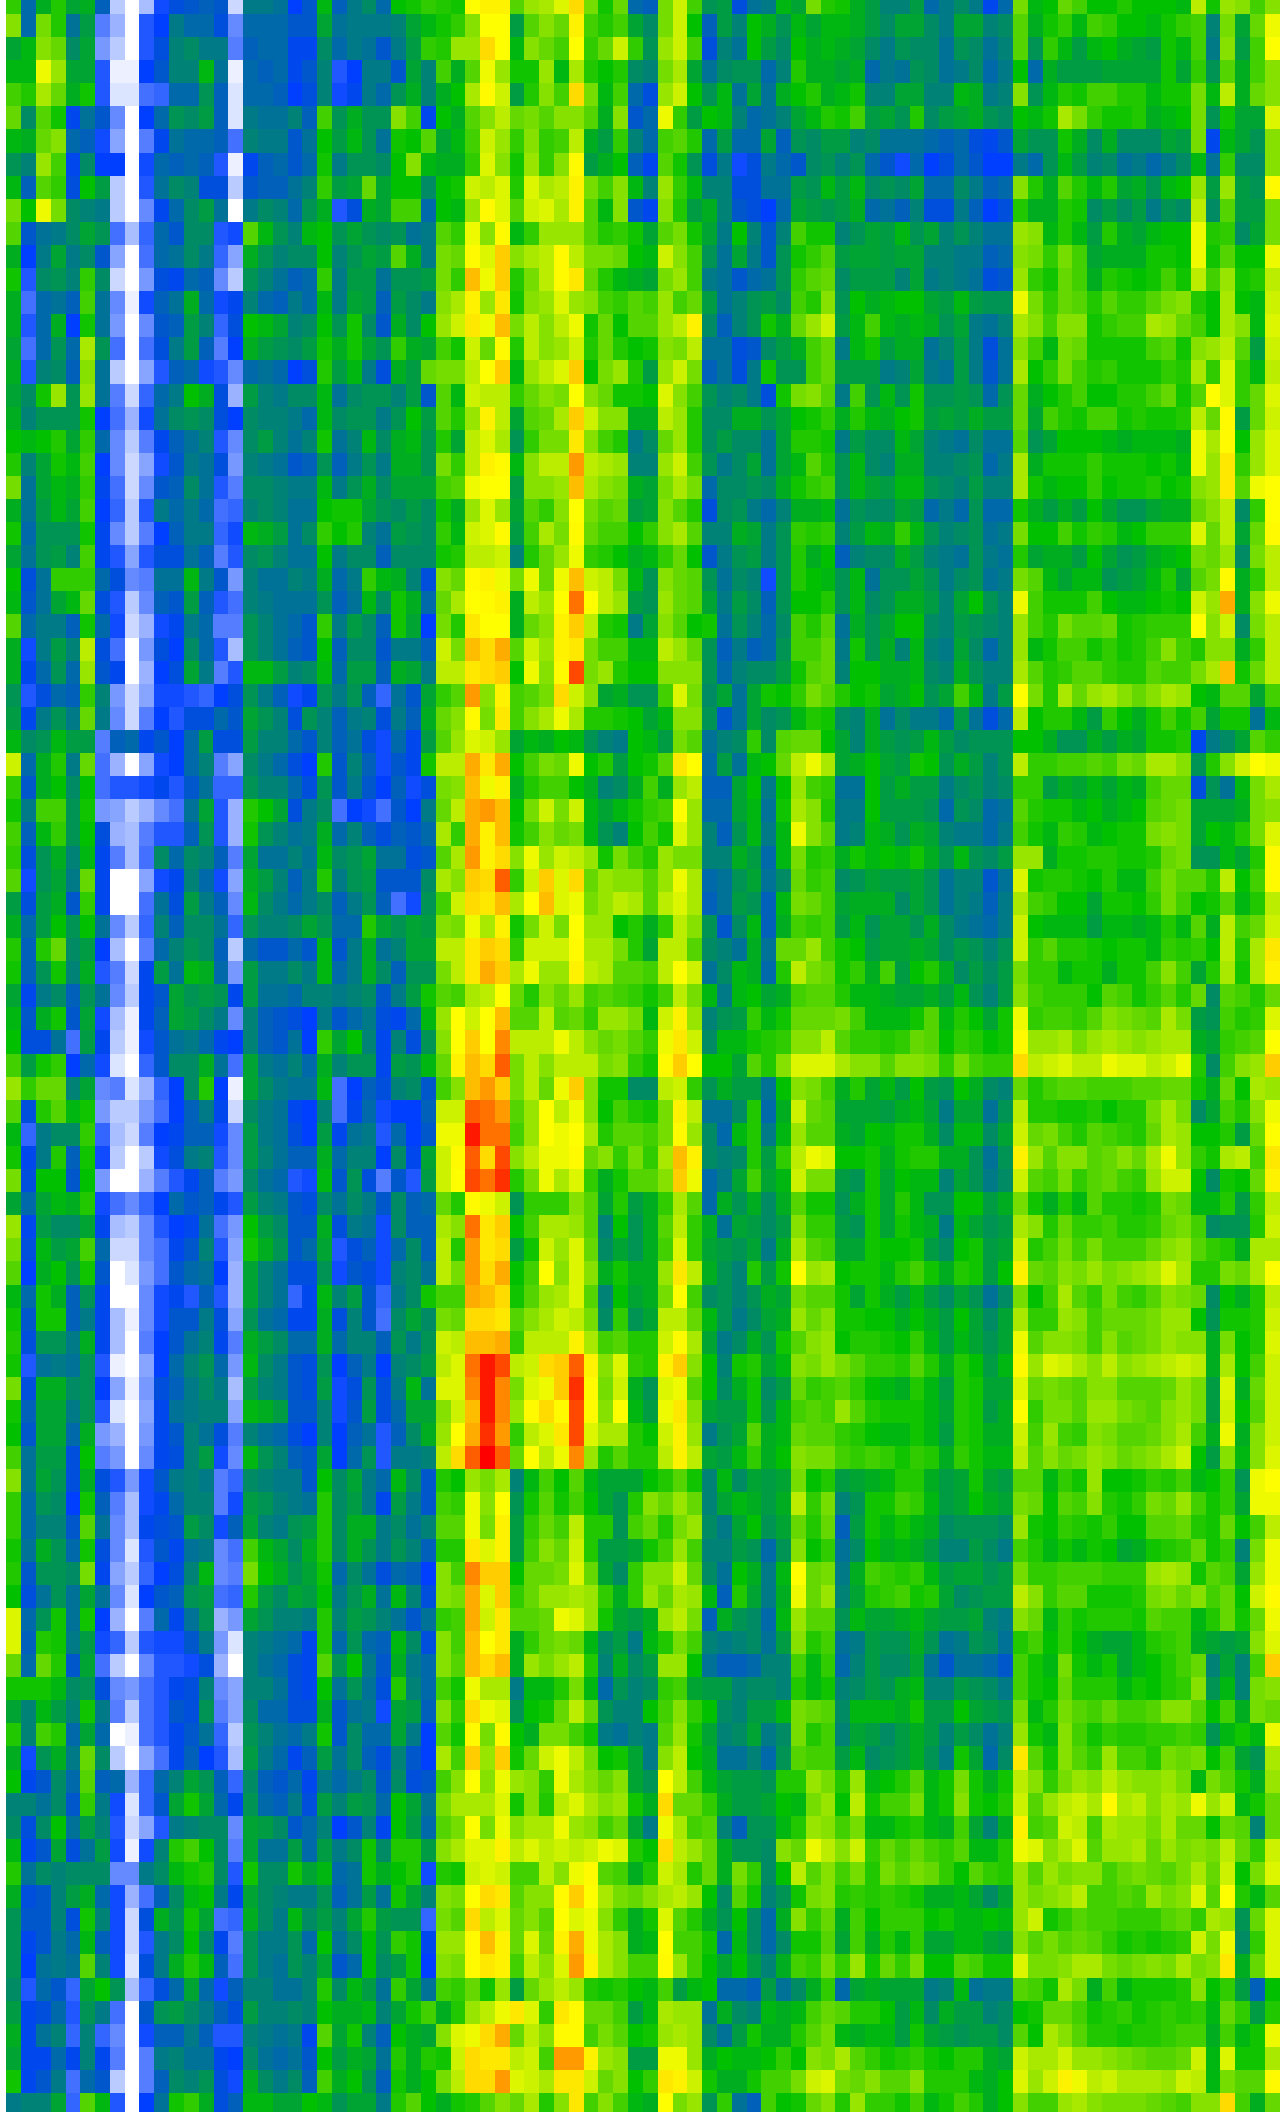

At2g26890  
At4g04920  
At3g04580  
At3g60800  
At5g11730  
At3g54950  
At3g10380  
At1g64040  
At1g18160  
At2g39480  
At1g75390  
At1g77280  
At2g22660  
At3g58460  
At5g41940  
At5g60620  
At5g12210  
At4g01710  
At5g28650  
At4g24060  
At4g02590  
At1g19220  
At2g43670  
At1g16310  
At1g11080  
At5g16520  
At2g43680  
At4g37250  
At5g55000  
At5g67380  
At4g24550  
At3g29330  
At3g30843  
At2g26300  
At2g07721  
At1g65220  
At3g47700  
At1g55830  
At3g27000  
At1g66410  
At3g32940  
At1g34320  
At5g57160  
At3g03305  
At1g75510  
At3g10330  
At5g55030  
At5g67250  
At1g50410  
At4g12760  
At3g47990  
At2g14120  
At5g35880  
At5g07740  
At5g58510  
At2g27900  
At2g17980  
At5g49830  
At1g03280  
At3g11910  
At1g09730  
At5g13540  
At2g35920  
At2g01100  
At3g62740  
At1g05770  
At3g11240  
At1g73850  
At1g26300  
At2g19950  
At1g07870  
At5g64220  
At1g25280  
At1g21980  
At3g61350  
At2g17790  
At4g16430  
At5g62540  
At4g24210  
At3g29160  
At3g05940  
At1g04010  
At2g28350  
At4g35840  
At5g40250  
At2g22300  
At2g14170  
At1g75760  
At4g25710  
At4g14900  
At4g14290  
At5g51400

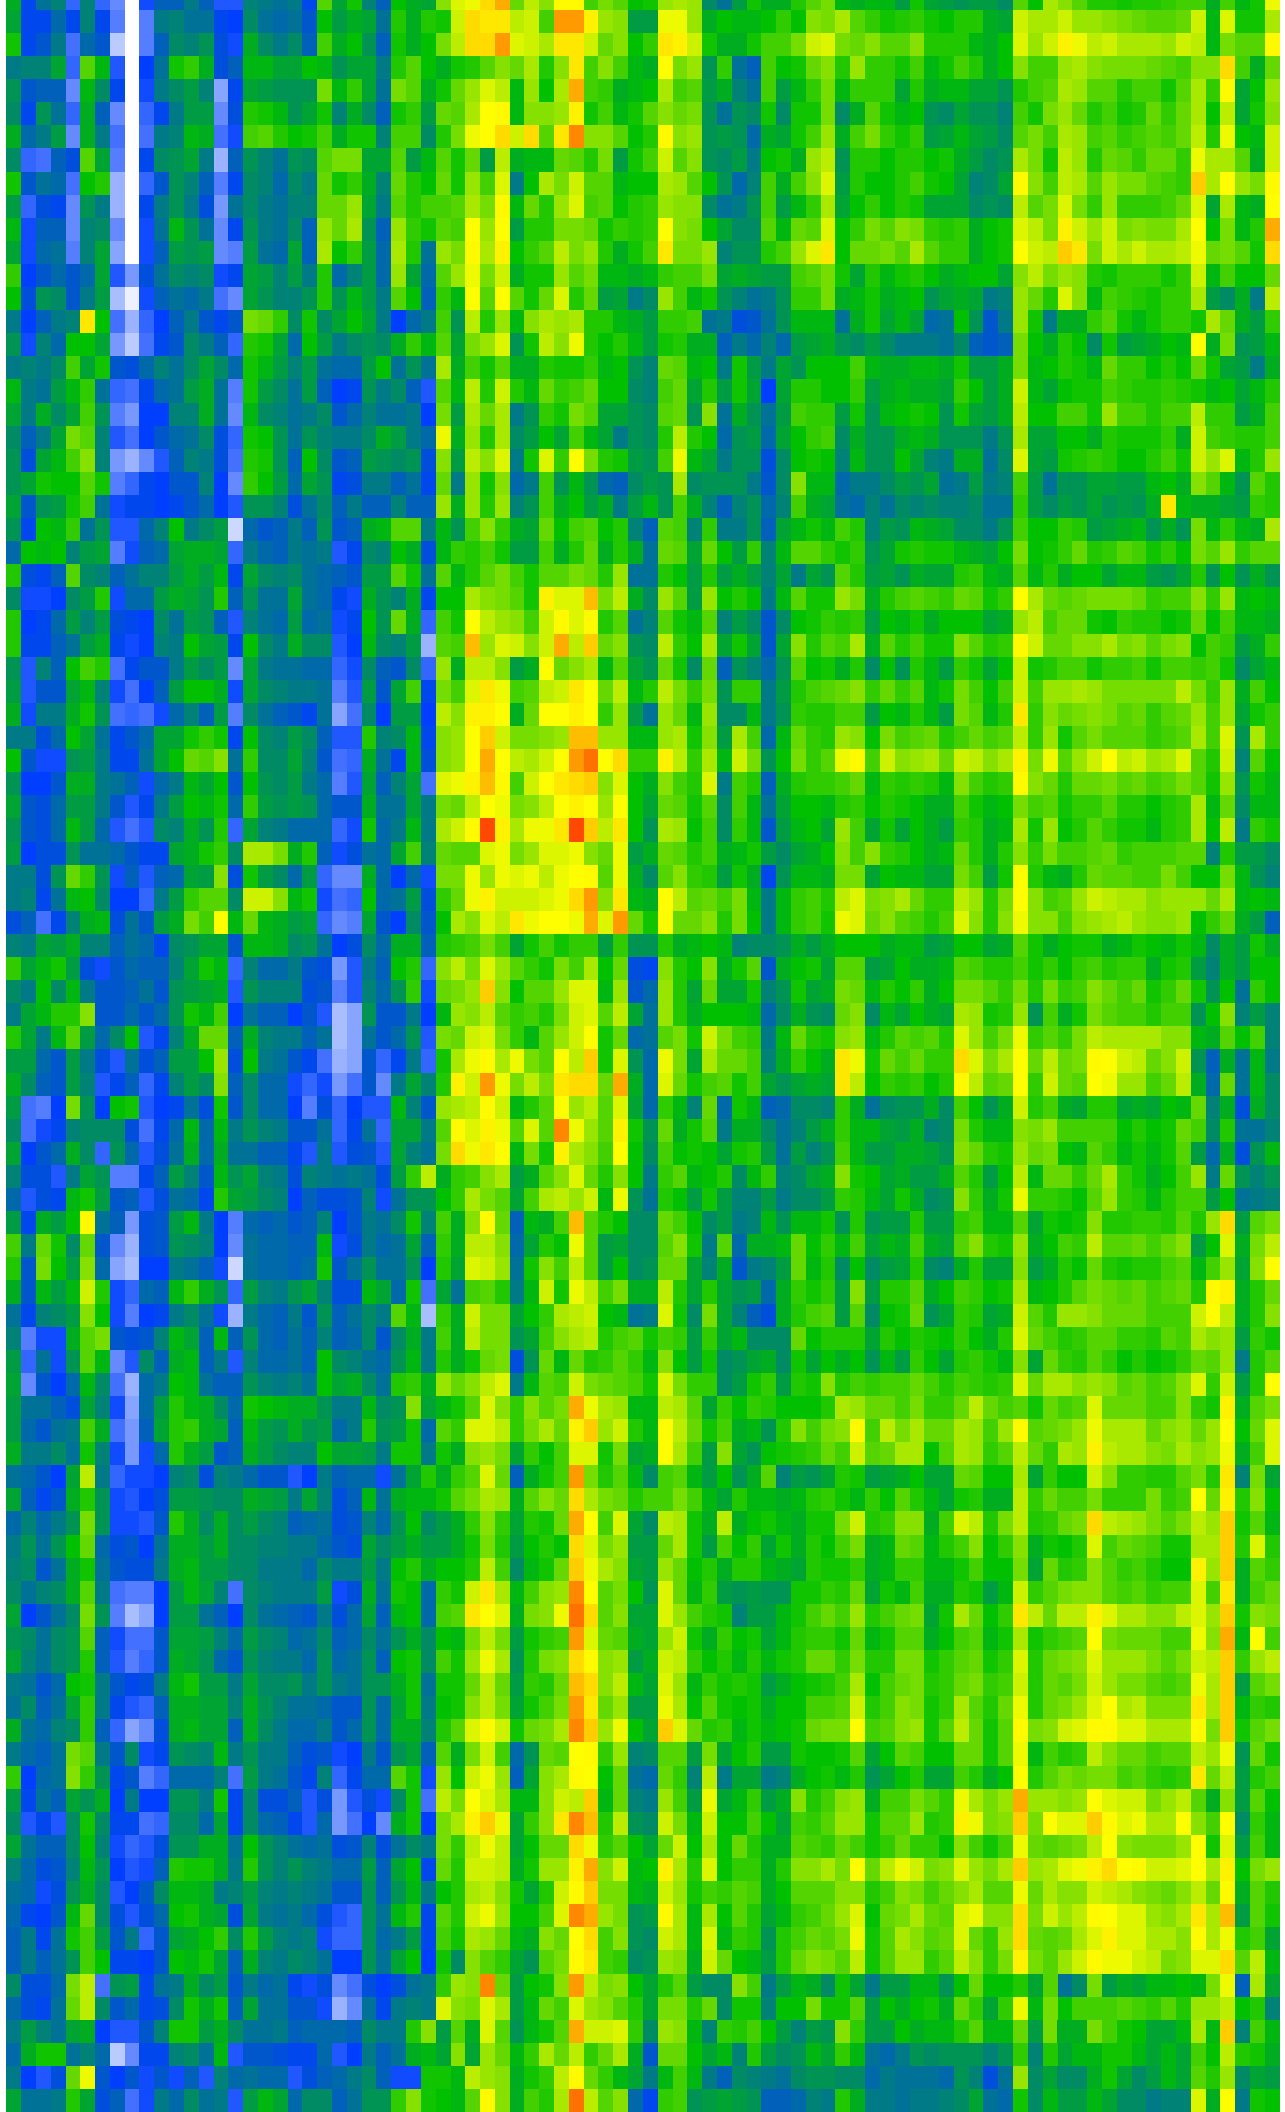

At4g23740  
At4g14900  
At4g14290  
At5g51400  
At5g14240  
At2g15240  
At3g60600  
At2g38710  
At5g65670  
At3g13772  
At1g71010  
At3g18990  
At1g51170  
At4g28370  
At5g58740  
At3g01090  
At5g24860  
At5g53130  
At3g50280  
At5g67160  
At4g32180  
At1g55120  
At5g48020  
At3g55320  
At5g09810  
At1g51140  
At2g47850  
At5g47020  
At1g17790  
At1g02260  
At3g59000  
At1g54370  
At5g08210  
At1g17930  
At4g36050  
At4g23660  
At4g36980  
At5g04110  
At1g01710  
At4g21326  
At3g05520  
At1g62910  
At3g04605  
At2g24530  
At4g10970  
At1g09060  
At3g15790  
At1g17370  
At2g32950  
At1g72820  
At5g67440  
At1g54080  
At5g07840  
At2g29400  
At2g44180  
At2g28930  
At1g28070  
At5g54855  
At1g75420  
At2g34470  
At3g12950  
At2g47960  
At4g30900  
At1g13600  
At1g74920  
At3g15220  
At2g42610  
At5g28490  
At3g54430  
At4g36520  
At3g23640  
At5g03680  
At1g52150  
At2g20100  
At1g62360  
At1g23380  
At5g09460  
At4g33080  
At2g38440  
At5g01020  
At3g57670  
At4g30520  
At5g58930  
At4g08980  
At5g02030  
At1g19330  
At1g63990  
At4g14965  
At1g80530  
At5g09810  
At1g53280  
At3g59910

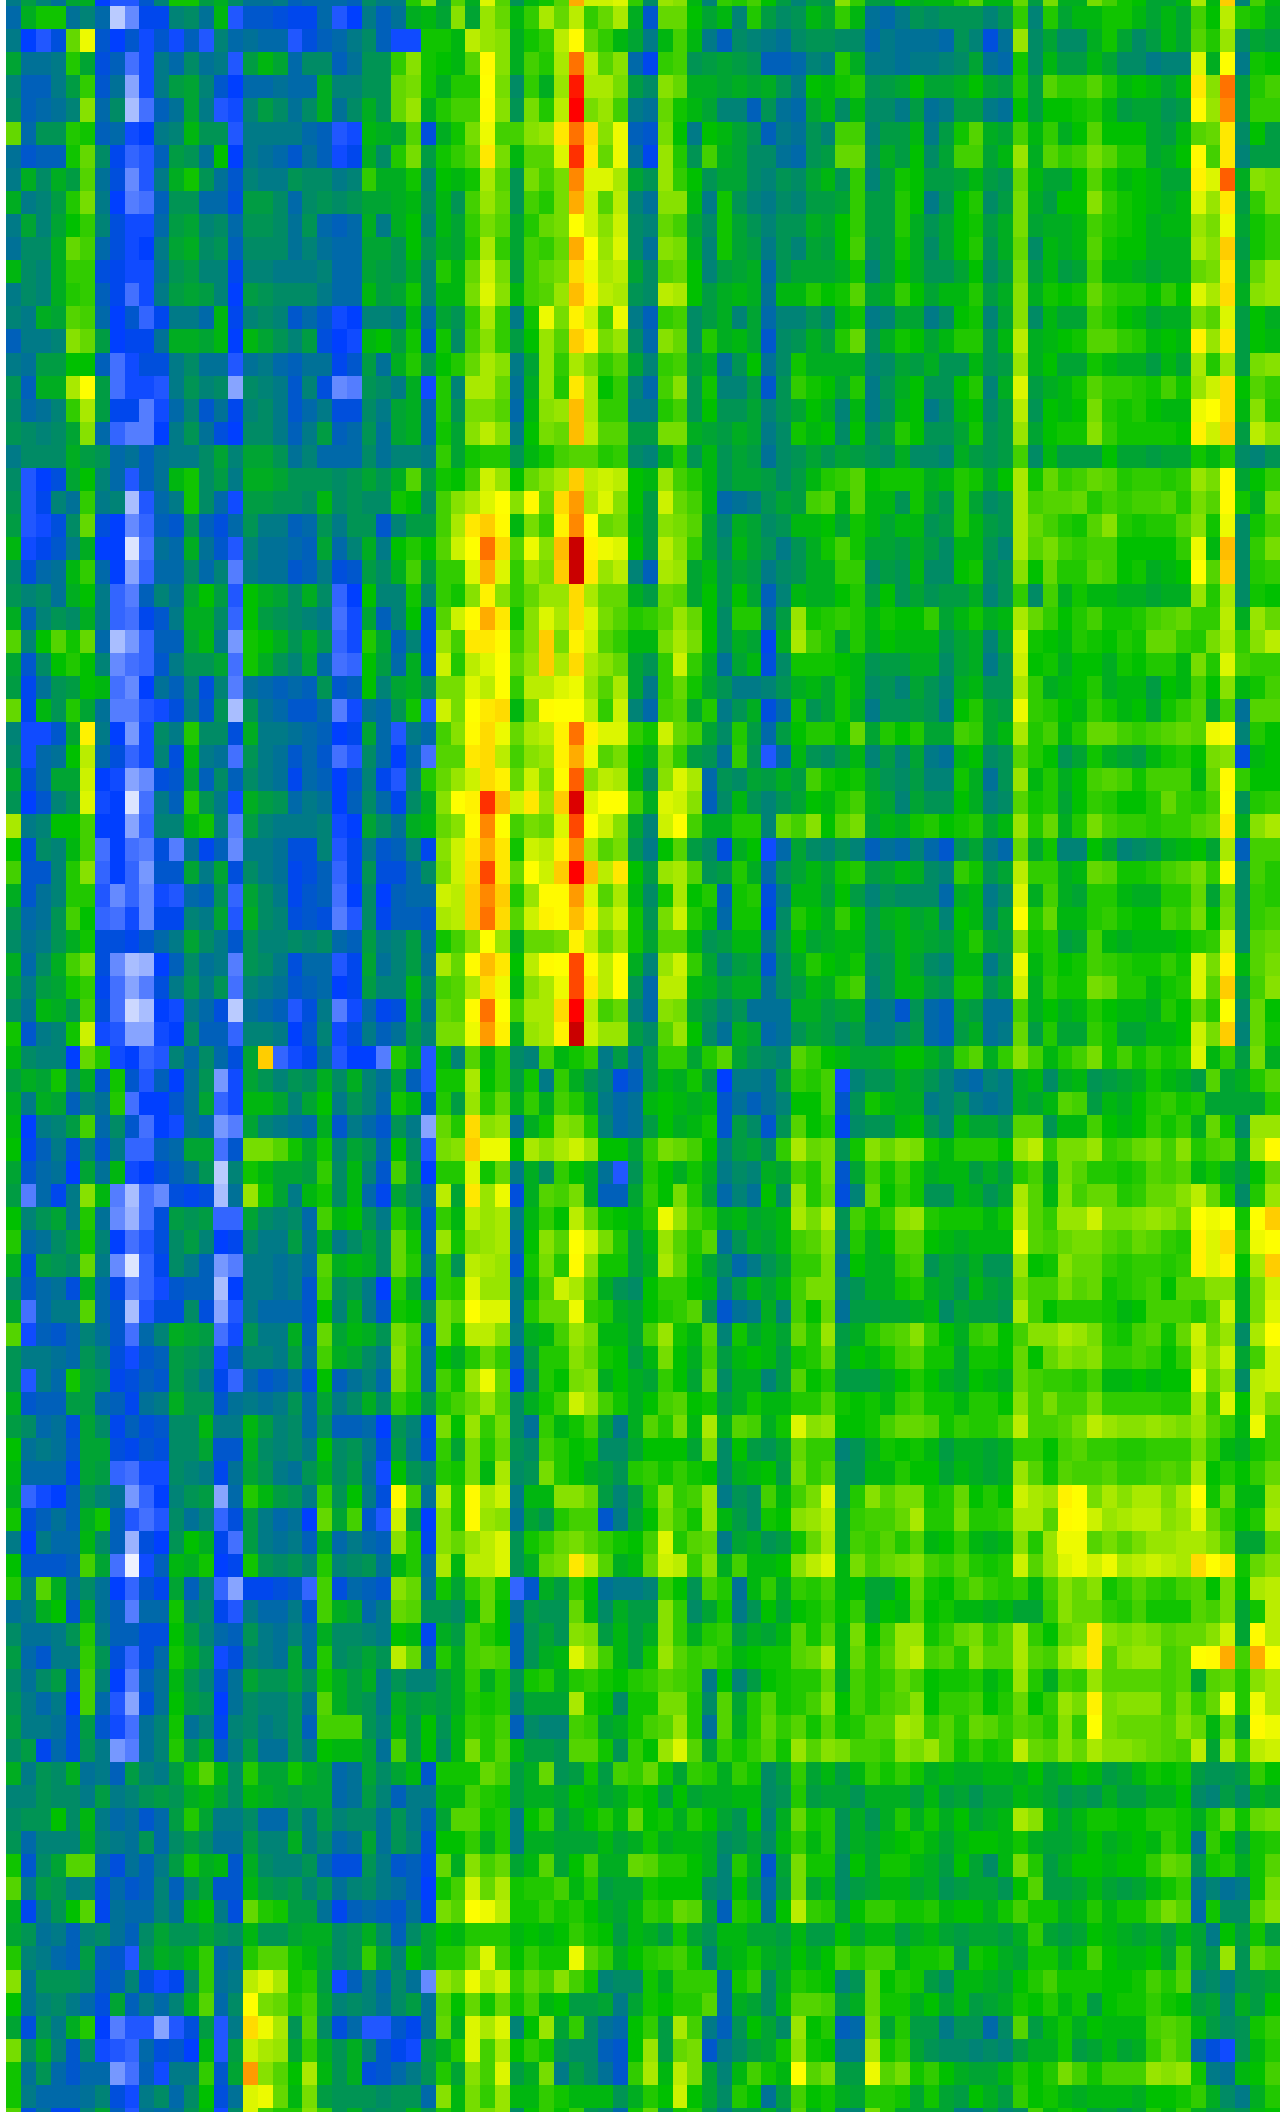

At5g09810  
At1g53280  
At3g59910  
At4g27000  
At5g20520  
At2g19810  
At3g14100  
At3g16500  
At1g01070  
At2g44745  
At5g11930  
At2g17260  
At1g64620  
At2g40130  
At5g64550  
At4g32010  
At1g14790  
At3g17950  
At4g29080  
At2g32790  
At2g31290  
At3g24120  
At5g05480  
At1g17210  
At3g22440  
At4g23330  
At1g14910  
At2g14680  
At5g26240  
At4g14340  
At1g16710  
At1g57540  
At1g16810  
At1g49170  
At5g04910  
At5g12230  
At1g65280  
At5g59830  
At4g00040  
At1g01040  
At4g29990  
At4g18120  
At1g03040  
At5g06140  
At5g66180  
At5g26620  
At5g08350  
At2g35170  
At5g24800  
At5g54280  
At1g55810  
At3g15610  
At1g69580  
At5g64340  
At1g56230  
At5g19530  
At3g03380  
At3g52490  
At1g68810  
At1g63430  
At3g22810  
At3g25130  
At3g20450  
At3g42950  
At4g30200  
At5g08080  
At1g02130  
At3g10190  
At5g07300  
At1g10430  
At3g25560  
At5g48810  
At2g41510  
At1g16530  
At5g01840  
At5g67470  
At5g57140  
At4g30070  
At2g31370  
At1g61500  
At3g19280  
At1g48290  
At2g24830  
At5g56970  
At4g13190  
At1g55520  
At3g16150  
At3g21160  
At1g27710  
At4g11380  
At1g06540

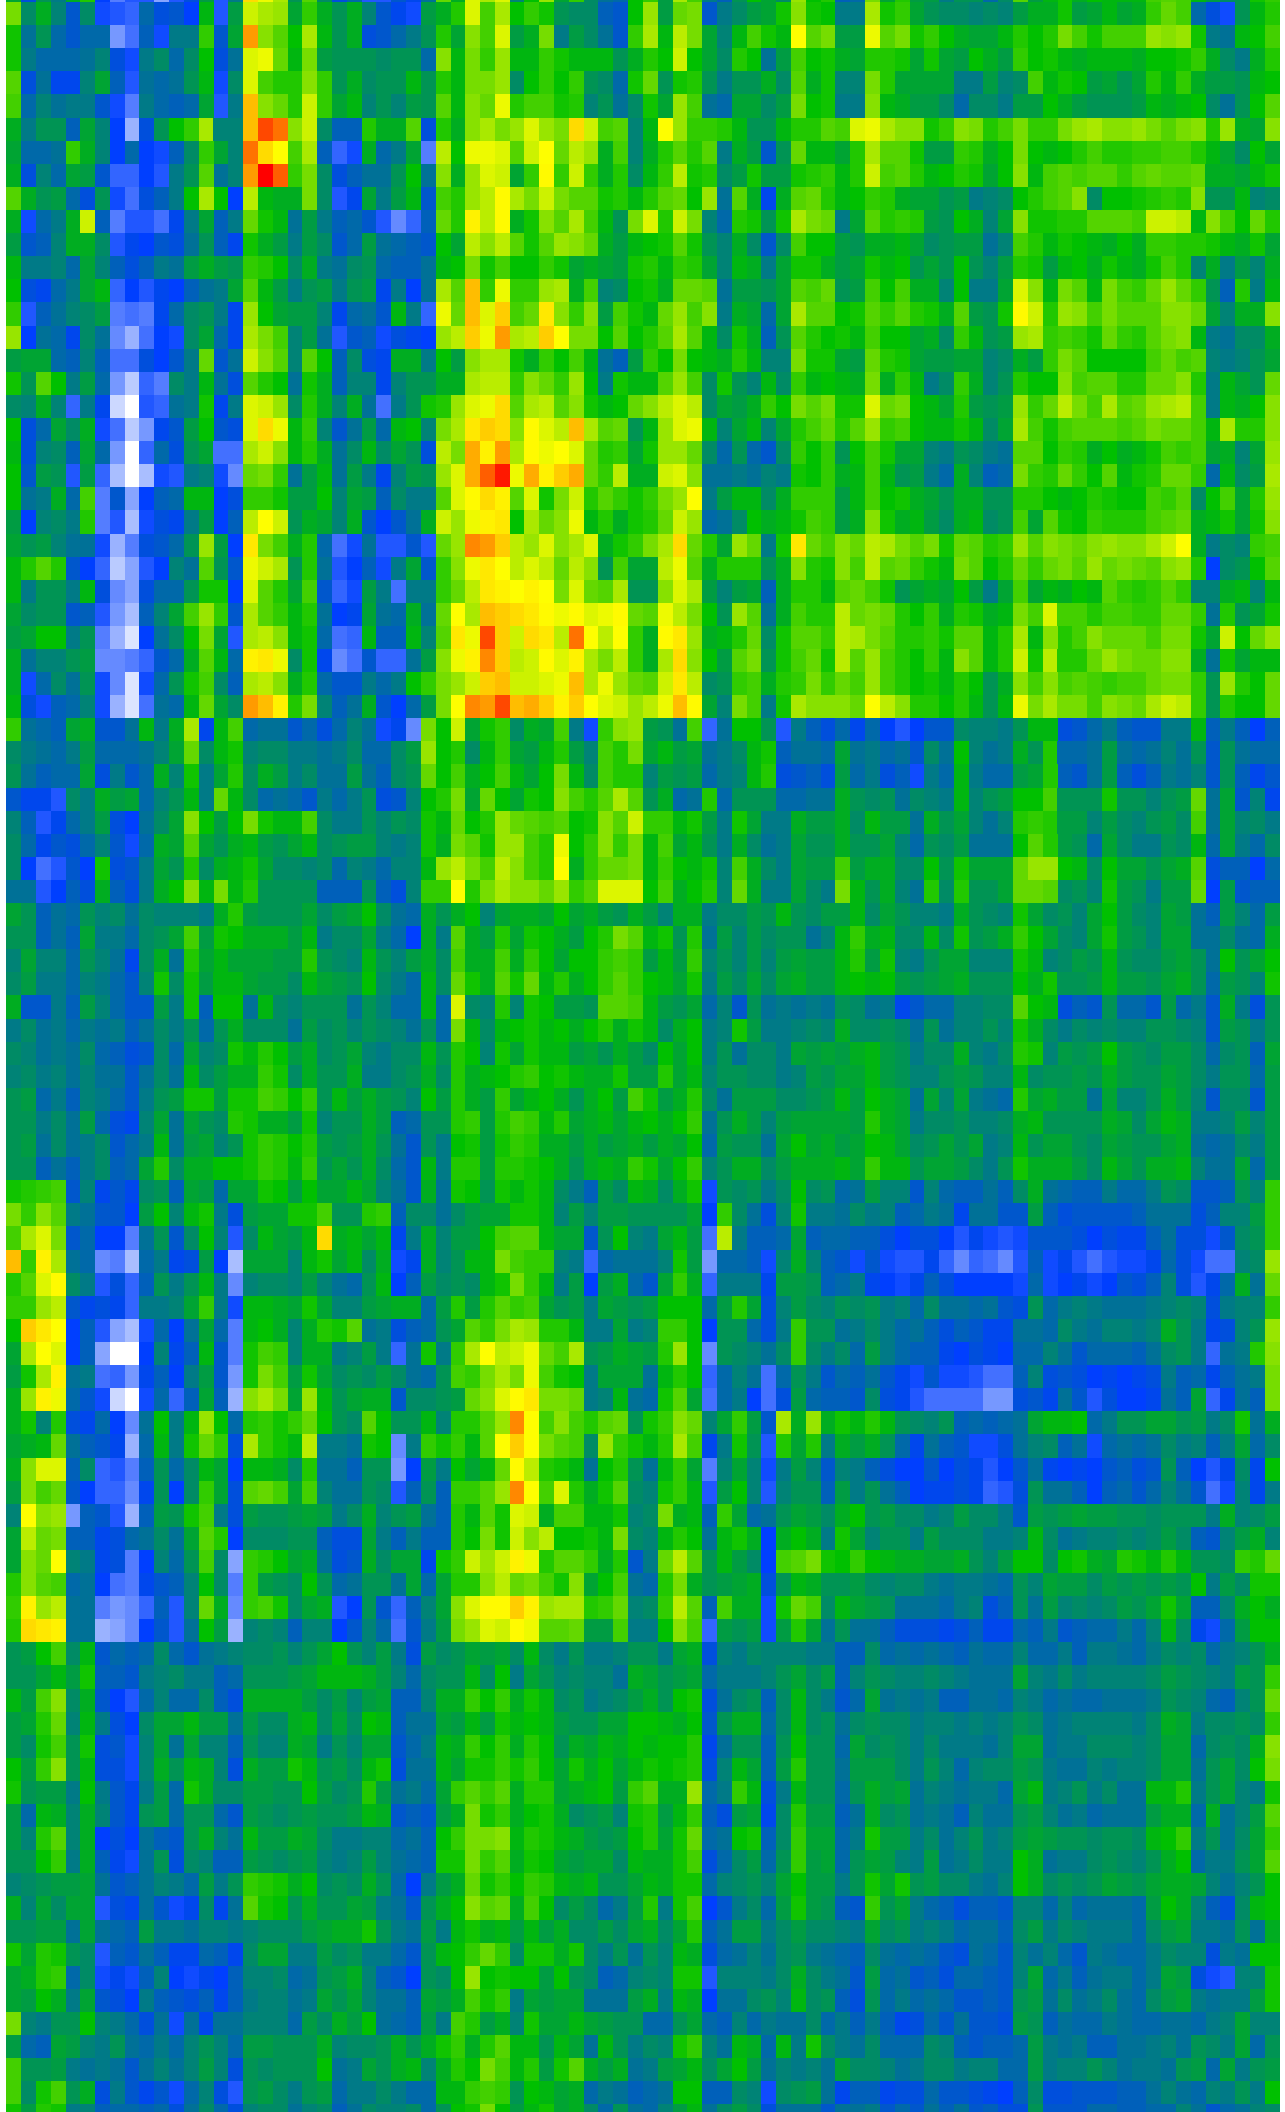

At1g27710  
At4g11380  
At1g06540  
At4g32890  
At1g33360  
At4g01960  
At3g02300  
At1g08030  
At1g42470  
At3g60480  
At5g14500  
At5g57310  
At3g53570  
At2g48040  
At1g54830  
At1g03260  
At1g53165  
At2g14835  
At5g42220  
At1g60610  
At1g11480  
At5g58110  
At5g11500  
At5g08630  
At3g23980  
At4g26270  
At4g11920  
At5g66010  
At1g06770  
At2g39760  
At1g08600  
At4g03770  
At1g29080  
At2g43860  
At1g54730  
At5g66460  
At5g44700  
At2g02780  
At3g03450  
At5g32540  
At3g42836  
At4g20490  
At5g09700  
At3g32917  
At4g18850  
At1g46912  
At4g36370  
At3g11870  
At2g11110  
At1g27220  
At5g09490  
At4g07750  
At2g02340  
At5g09800  
At4g05020  
At3g28210  
At3g07090  
At4g28550  
At4g27500  
At4g28480  
At4g08180  
At5g13690  
At1g65730  
At5g27760  
At3g05500  
At4g16500  
At1g75860  
At5g19000  
At5g65280  
At4g02195  
At1g68340  
At5g09340  
At4g03740  
At4g05580  
At5g62120  
At3g32120  
At3g30560  
At2g05400  
At4g03170  
At3g30200  
At1g42630  
At2g25990  
At4g08600  
At3g42390  
At3g28430  
At2g31700  
At1g11970  
At5g37090  
At3g17611  
At4g11660  
At4g15420  
At1g74000



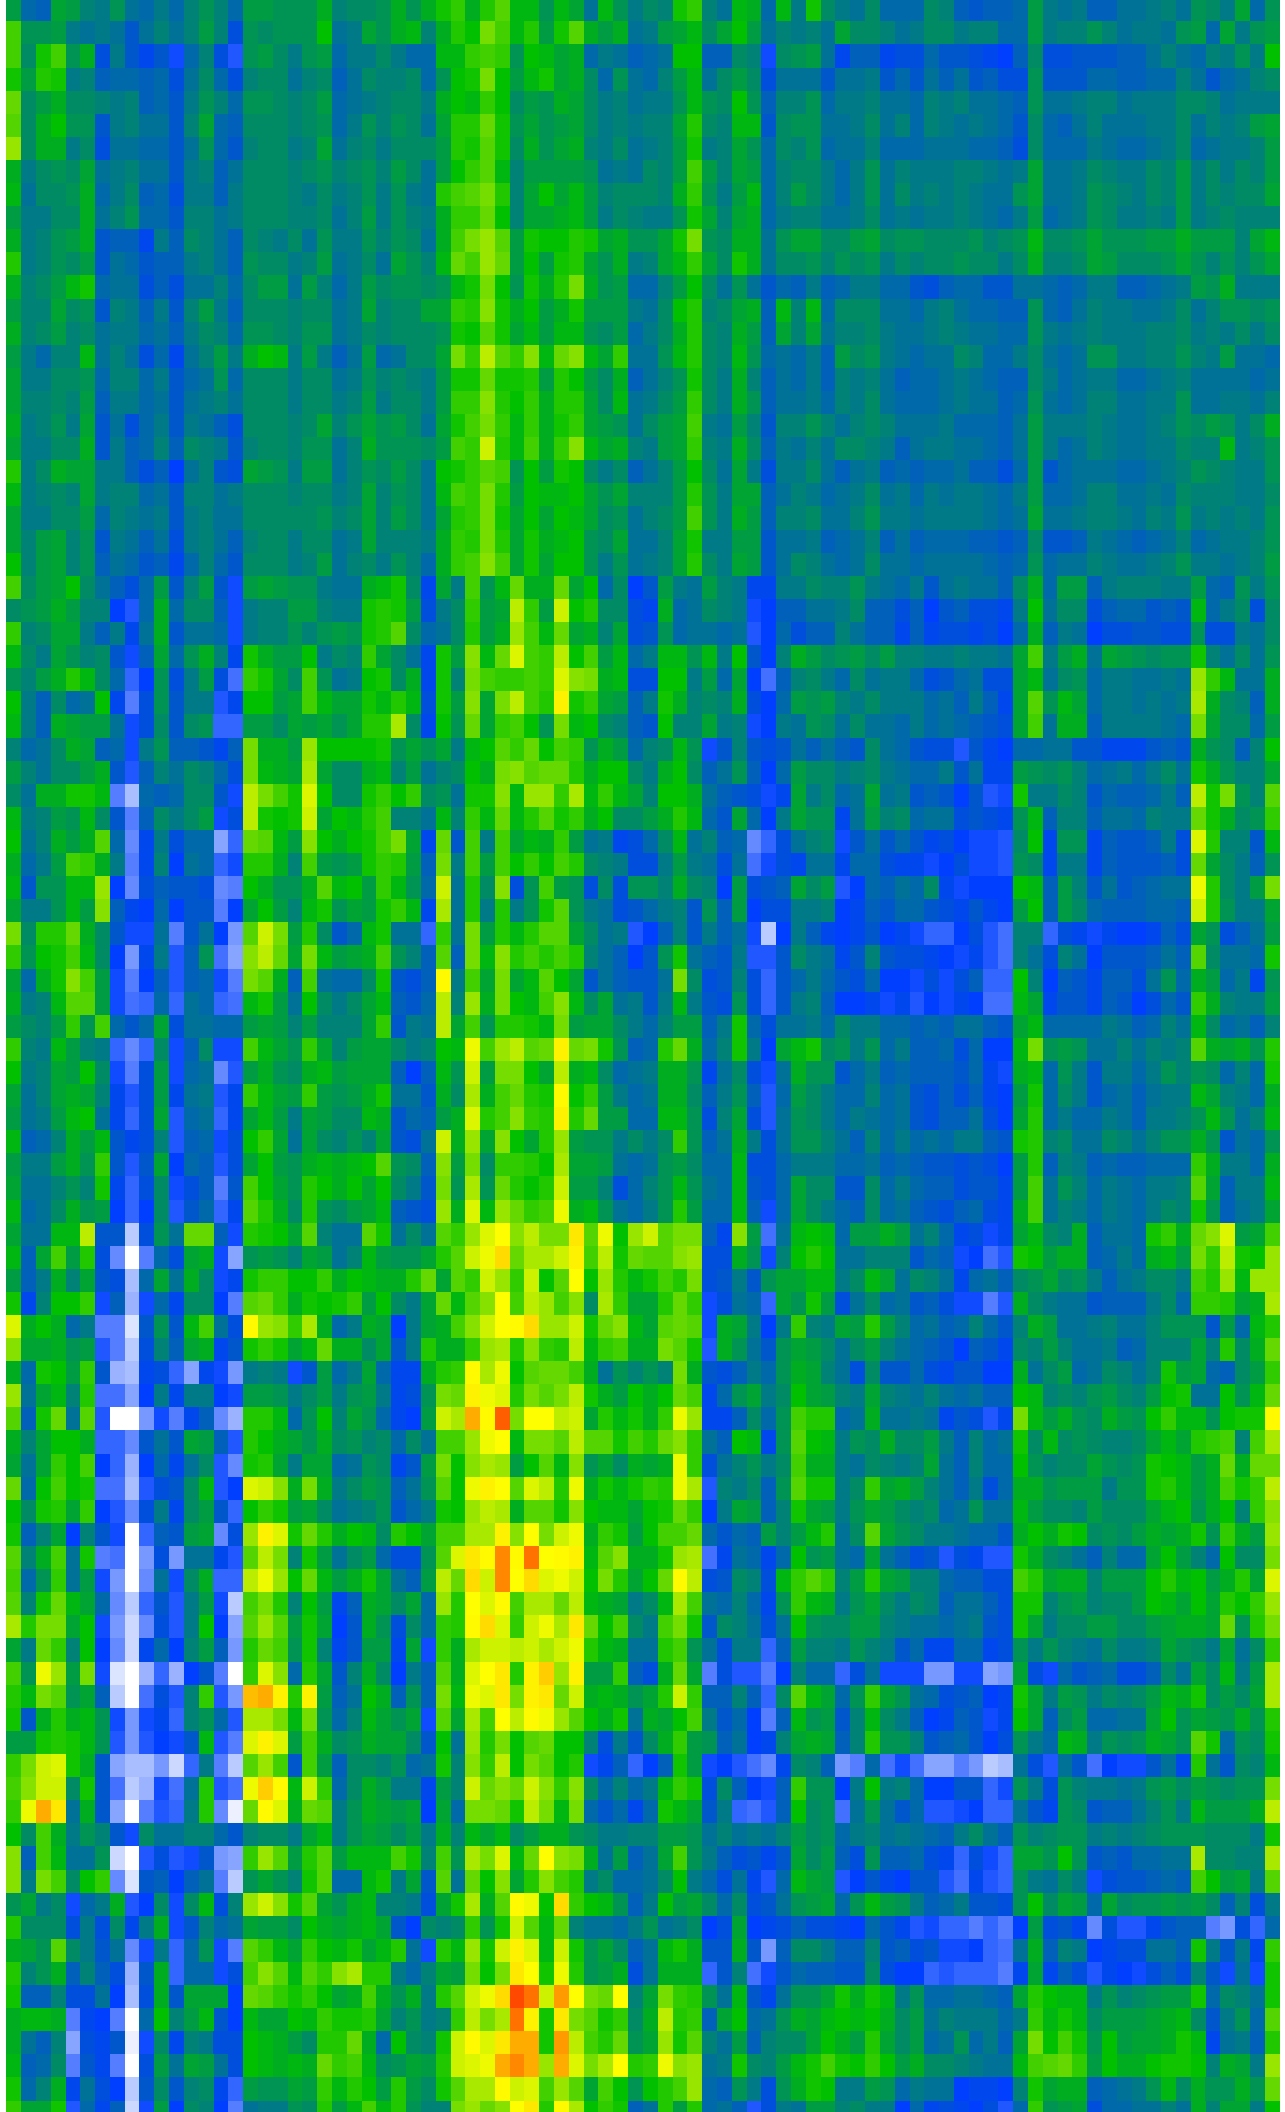

At3g17611  
At4g11660  
At4g15420  
At1g71000  
At2g26150  
At5g48570  
At5g51440  
At3g09640  
At5g59720  
At4g27670  
At2g07732  
At1g07350  
At5g18340  
At5g12020  
At2g46240  
At5g47830  
At5g37670  
At1g72660  
At4g23493  
At3g07150  
At3g24500  
At4g10250  
At4g21320  
At2g29500  
At4g12400  
At5g59220  
At4g02360  
At1g69260  
At1g24600  
At2g22800  
At3g10340  
At4g30470  
At3g01360  
At2g47670  
At3g13060  
At5g61430  
At3g14560  
At4g33150  
At2g32430  
At3g21550  
At5g01820  
At1g77770  
At3g10320  
At3g45010  
At1g20180  
At2g34790  
At2g19570  
At4g16640  
At1g22990  
At1g23010  
At5g04200  
At1g26820  
At1g11190  
At4g04620  
At5g63760  
At1g15020  
At2g41000  
At4g11350  
At1g04490  
At1g71170  
At3g43160  
At5g61450  
At1g80910  
At3g57950  
At5g35410  
At4g36460  
At1g34630  
At3g12570  
At3g53930  
At1g69360  
At4g22780  
At4g29960  
At5g61530  
At4g32440  
At3g55070  
At3g51990  
At2g42010  
At5g45710  
At1g12360  
At1g77820  
At4g19110  
At4g36790  
At3g30775  
At1g70780  
At4g17530  
At3g06420  
At3g10550  
At1g29330  
At2g46800  
At1g76760  
At5g11100  
At5g64260

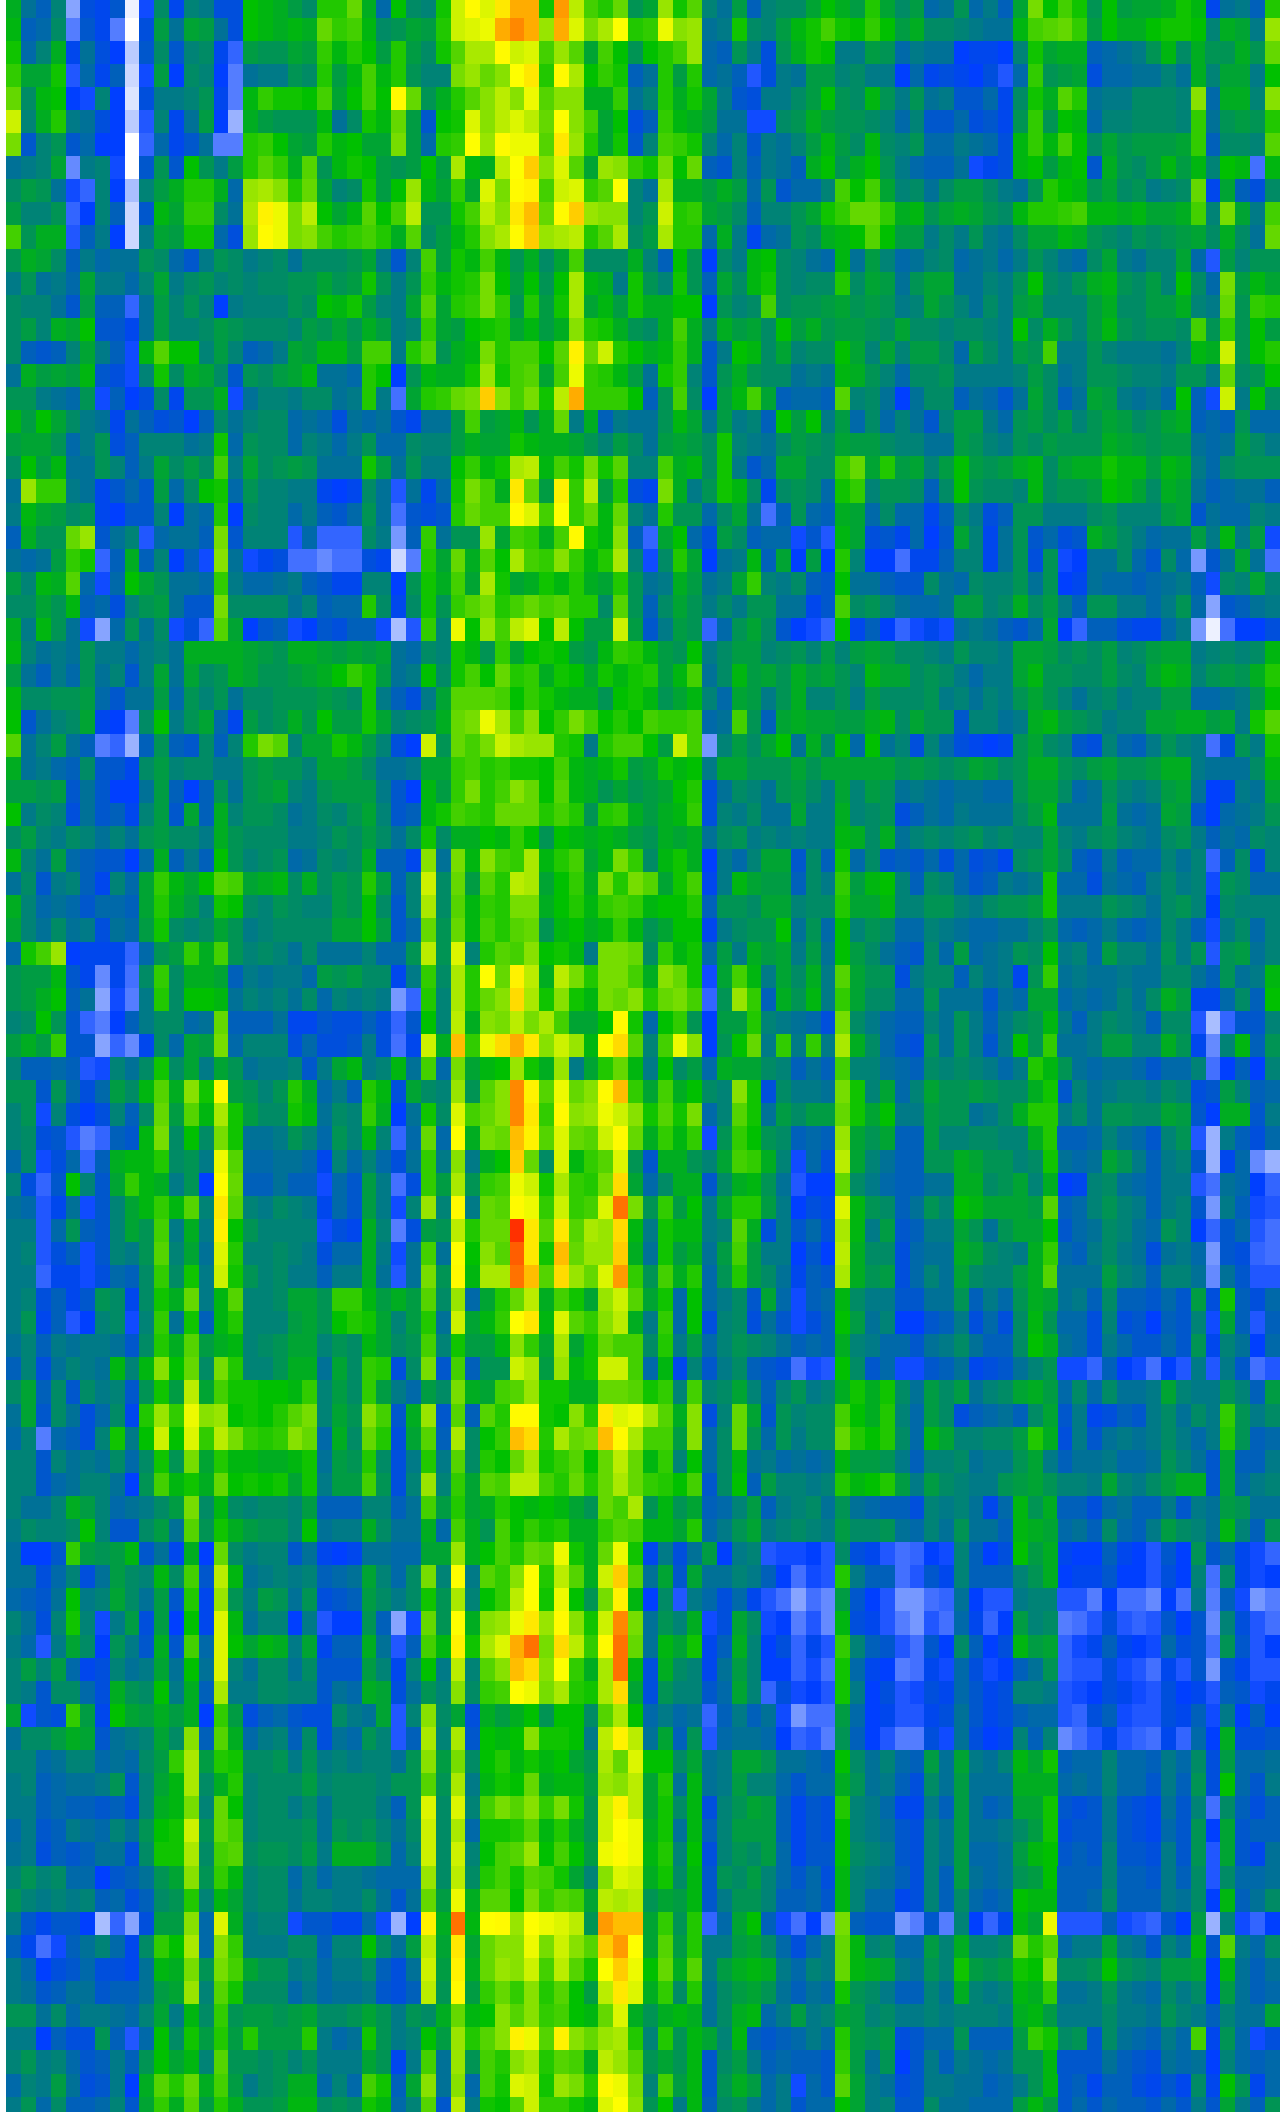

At2g46800  
At1g76760  
At5g11100  
At5g64260  
At2g01480  
At2g46270  
At3g54680  
At1g75950  
At5g44860  
At1g33250  
At5g01450  
At5g59060  
At3g60650  
At2g17850  
At5g64720  
At4g16170  
At3g52770  
At5g26870  
At4g20510  
At2g14570  
At2g36550  
At2g43520  
At4g38740  
At5g54390  
At3g43520  
At3g47910  
At1g21580  
At1g18500  
At3g42360  
At5g49290  
At3g02390  
At1g16040  
At5g47880  
At1g21430  
At1g35040  
At1g64020  
At4g04270  
At1g37080  
At5g05420  
At4g03940  
At1g33860  
At4g27730  
At2g04520  
At3g15352  
At1g55500  
At5g50960  
At3g21560  
At1g66650  
At5g27230  
At4g29840  
At2g43950  
At5g62650  
At2g45150  
At1g10310  
At4g24660  
At4g36910  
At2g47790  
At3g21720  
At1g28650  
At2g34960  
At3g22340  
At3g22860  
At3g01890  
At3g42310  
At4g32230  
At4g12910  
At1g55220  
At2g17650  
At2g20180  
At3g27020  
At1g63770  
At5g56290  
At5g14570  
At2g29090  
At5g67330  
At5g56260  
At1g43780  
At5g05290  
At2g40220  
At1g60090  
At4g39500  
At2g24560  
At2g27300  
At1g72570  
At3g14860  
At3g05190  
At5g14450  
At5g18220  
At2g31980  
At5g07480  
At4g27540  
At2g44800

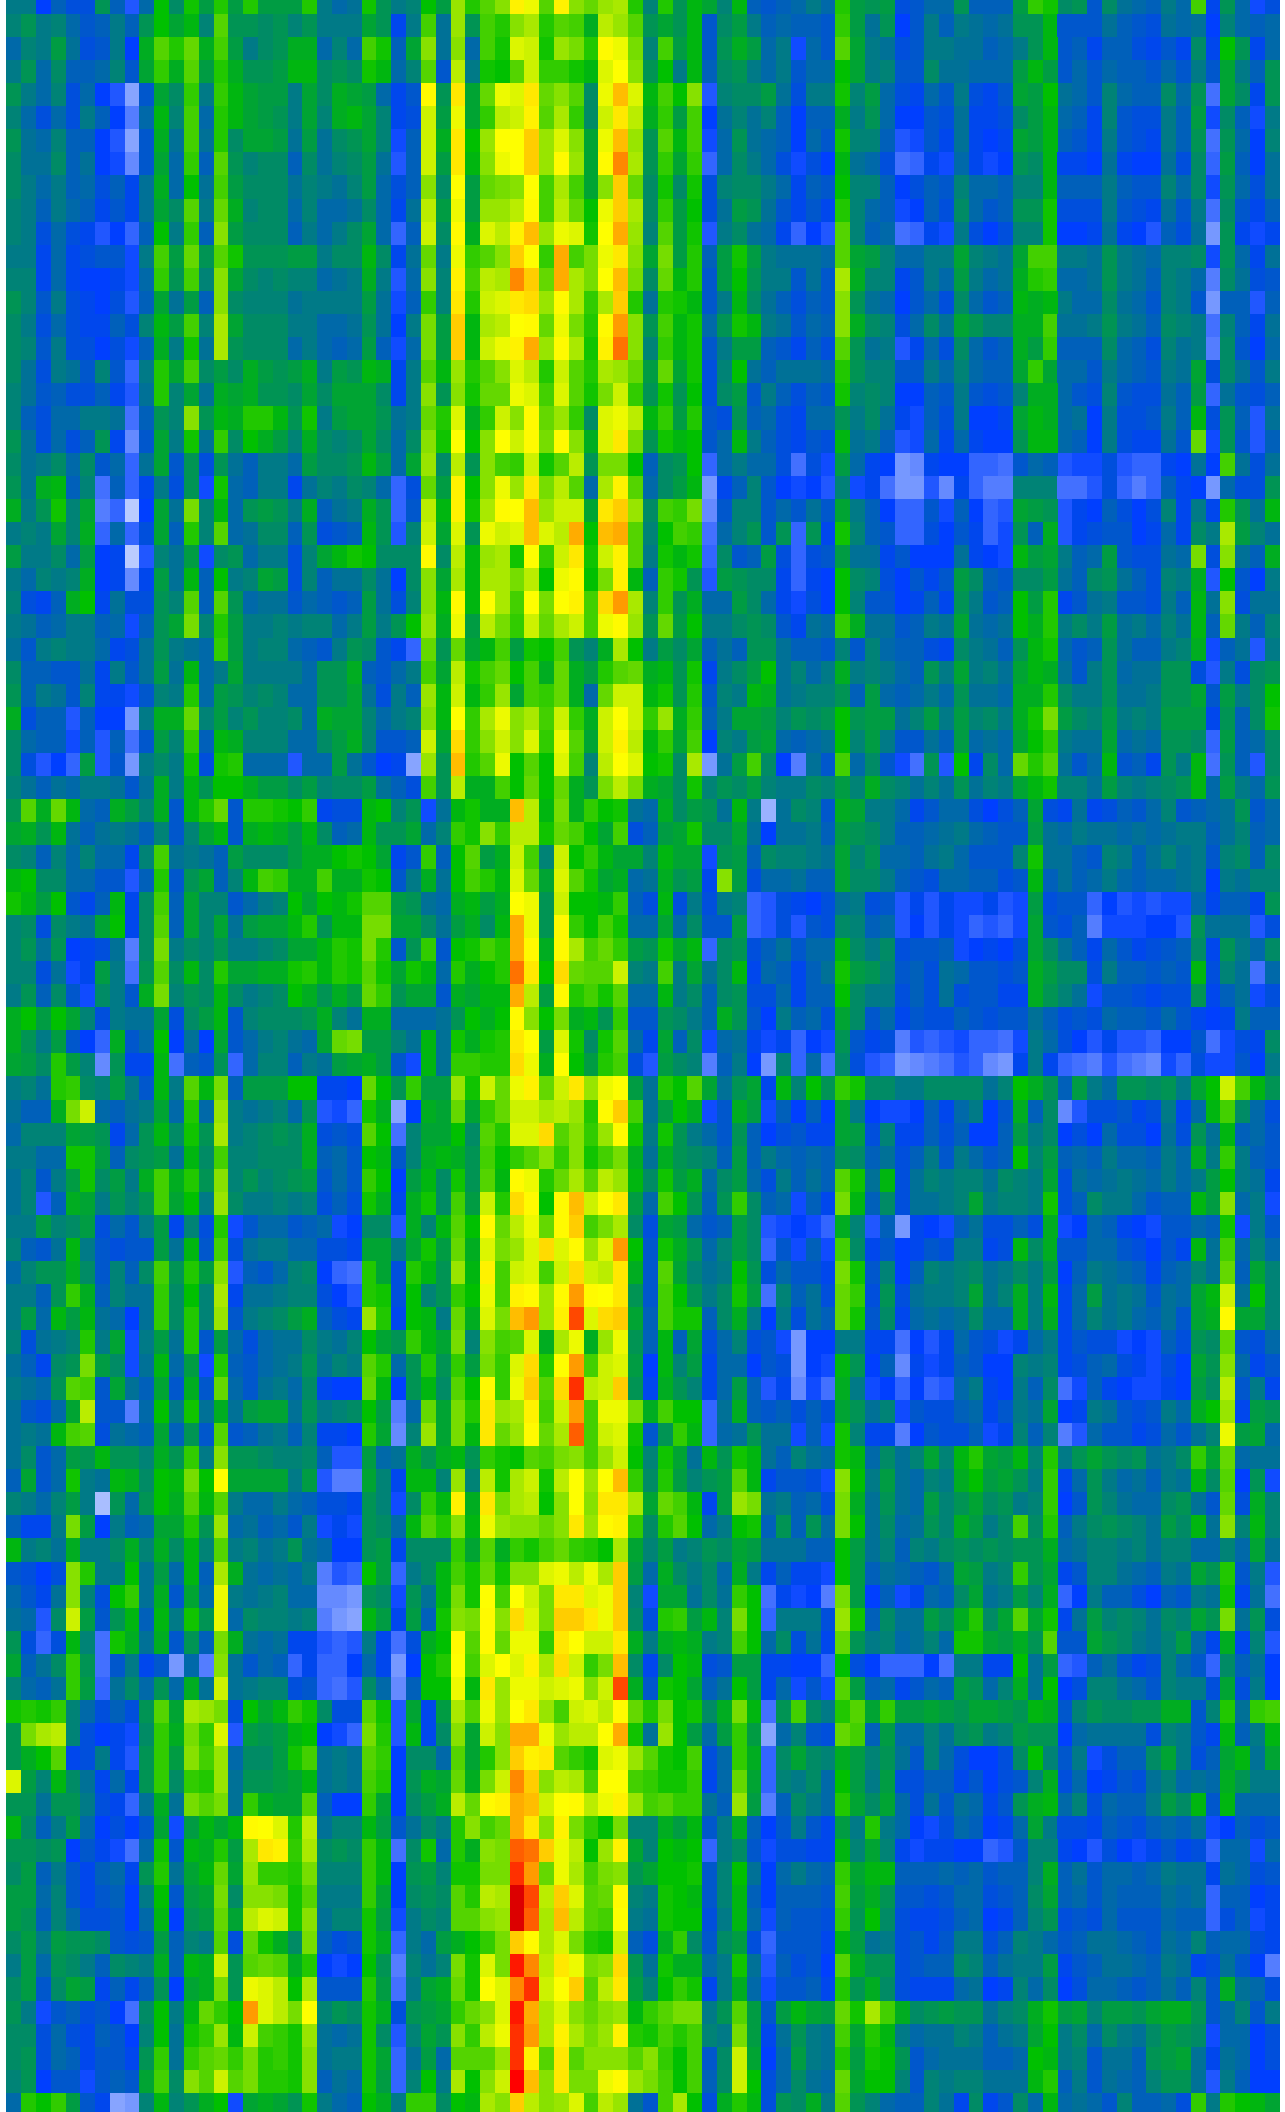

At2g1980  
At5g07480  
At4g27540  
At2g44800  
At2g22780  
At5g42890  
At3g06860  
At4g16210  
At1g68240  
At5g10120  
At1g48660  
At4g27250  
At5g57390  
At5g09970  
At4g11140  
At4g24150  
At2g46950  
At3g58060  
At3g61070  
At2g34340  
At2g36460  
At2g42280  
At5g27600  
At5g60540  
At3g14230  
At4g14430  
At1g77480  
At4g37580  
At3g19070  
At2g26040  
At1g80340  
At5g45920  
At1g33790  
At2g12720  
At5g51810  
At4g02890  
At4g09150  
At2g41230  
At1g17830  
At1g07150  
At1g02816  
At5g58660  
At1g55190  
At3g03230  
At5g45630  
At3g57020  
At2g37970  
At2g44900  
At5g41960  
At5g60100  
At3g20810  
At2g01410  
At5g40970  
At1g06200  
At4g35300  
At1g01990  
At1g64180  
At2g41710  
At1g29260  
At3g23490  
At5g04880  
At4g14615  
At3g45770  
At1g12520  
At3g18980  
At1g13810  
At2g38950  
At1g14470  
At1g72190  
At4g14190  
At3g08020  
At5g23330  
At1g55090  
At1g31790  
At3g61800  
At2g35510  
At4g23040  
At3g50940  
At3g11440  
At3g02480  
At2g19450  
At4g18920  
At1g14530  
At1g31750  
At3g22740  
At2g30350  
At3g01200  
At5g10730  
At1g47980  
At1g48470  
At1g04920  
At1g47240

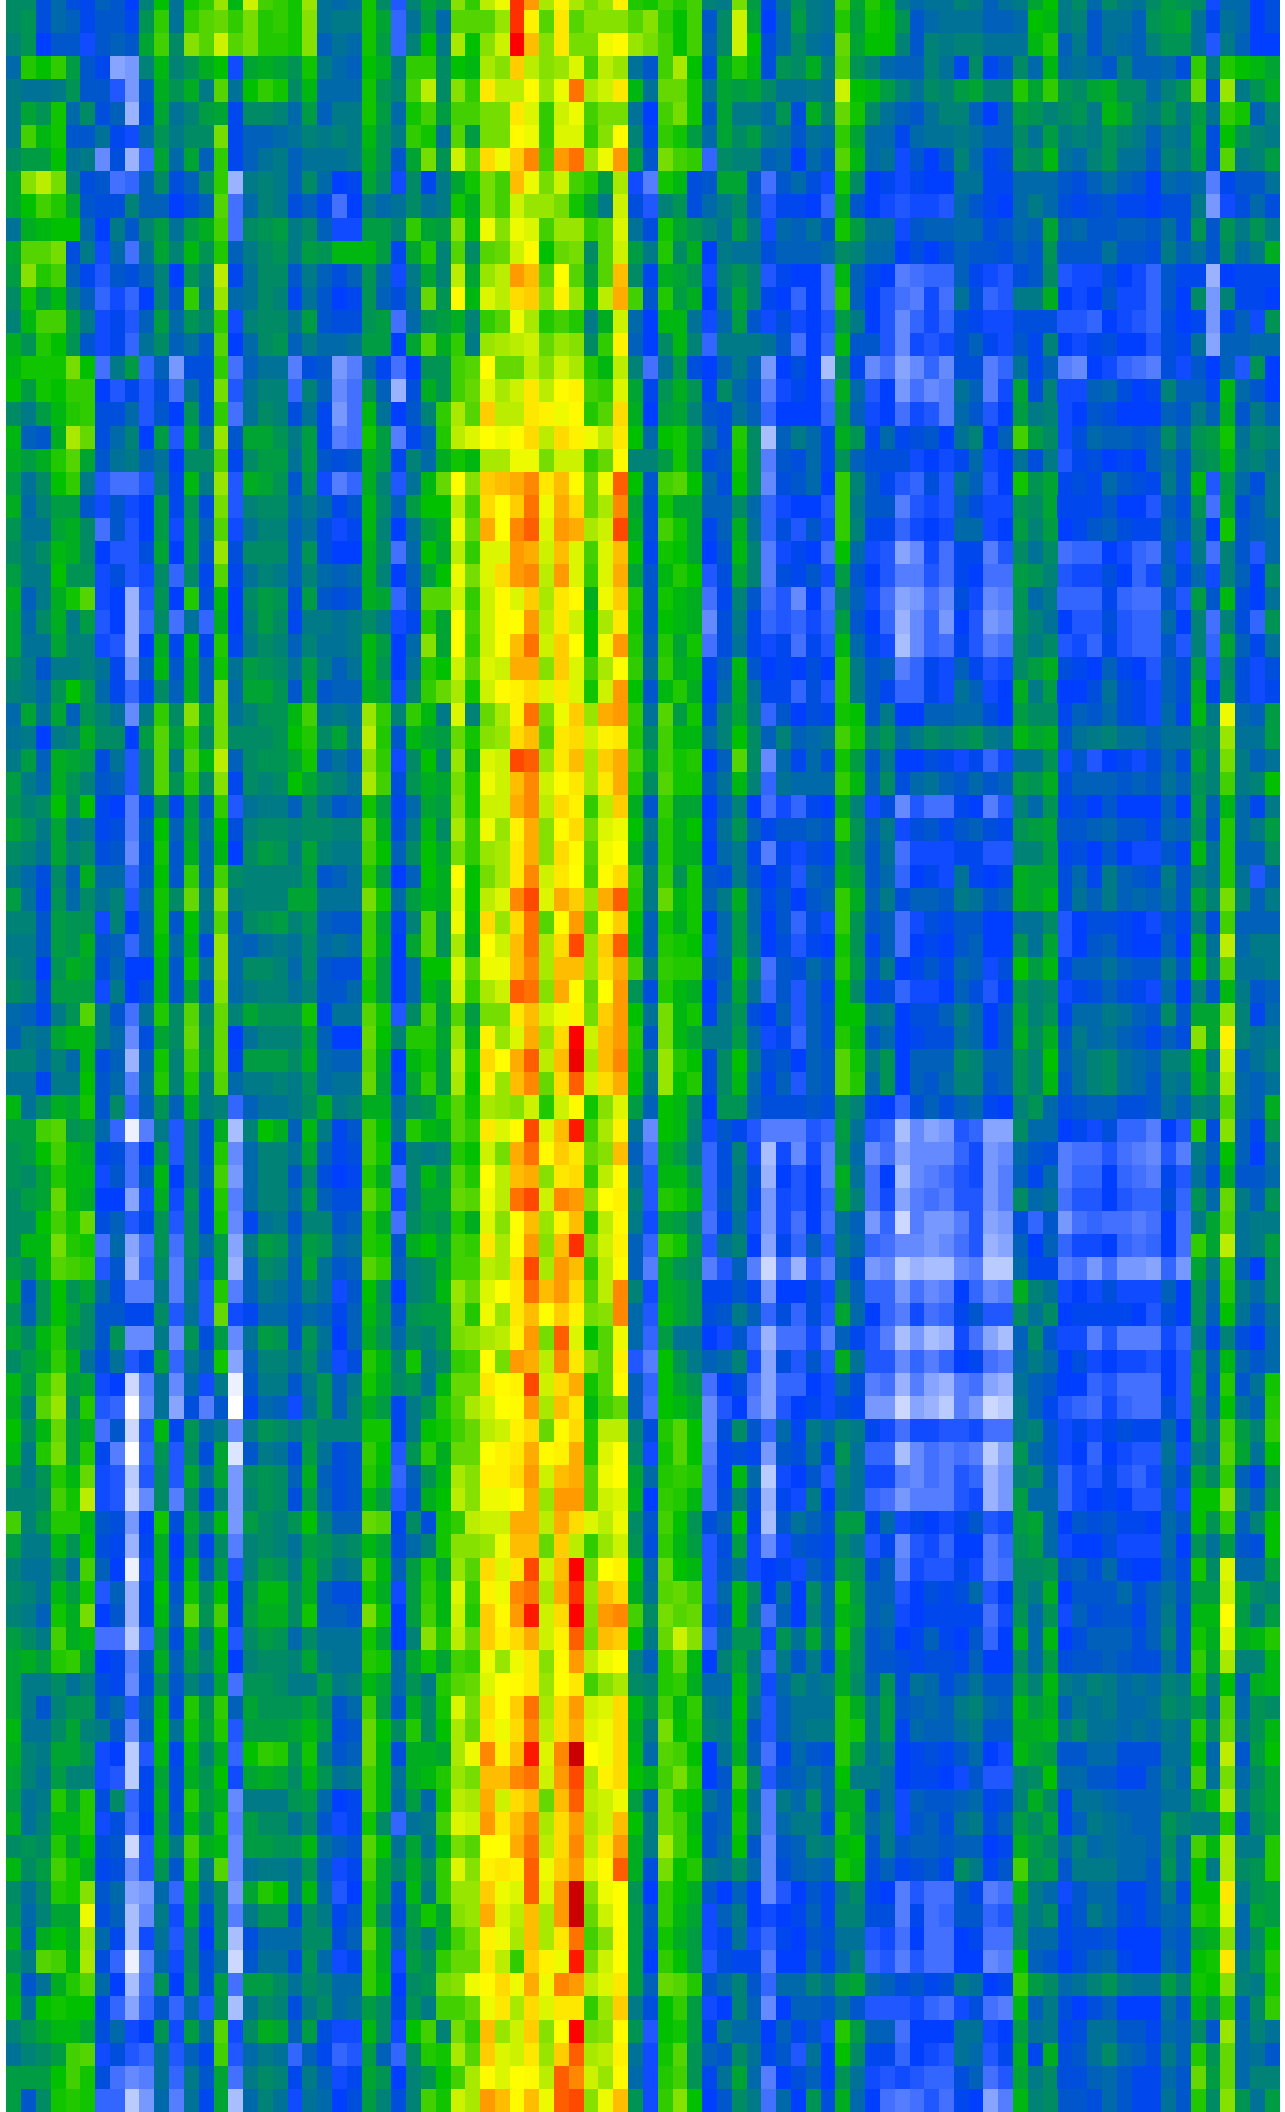

At1g77580  
At1g48470  
At1g04920  
At1g47240  
At3g50370  
At5g58020  
At3g58630  
At3g55560  
At1g01650  
At1g77680  
At3g10400  
At1g07130  
At5g54300  
At5g17490  
At3g46660  
At3g06810  
At4g27650  
At1g06130  
At2g18440  
At5g49580  
At3g01990  
At4g39850  
At4g11110  
At5g22290  
At4g07990  
At4g31670  
At5g46180  
At1g16210  
At2g42790  
At5g02580  
At3g23790  
At2g35900  
At1g48550  
At2g35550  
At2g36370  
At1g28540  
At3g62090  
At3g61900  
At3g58680  
At2g26350  
At5g03560  
At2g04880  
At2g17640  
At3g10450  
At5g62200  
At4g00335  
At1g17530  
At2g33740  
At1g02750  
At3g20770  
At1g76590  
At4g28390  
At5g41350  
At2g18250  
At1g75810  
At1g21000  
At5g16820  
At2g03340  
At5g04040  
At2g18915  
At1g13960  
At1g32790  
At5g13330  
At4g24690  
At3g08690  
At2g23090  
At2g31130  
At5g67600  
At4g27130  
At3g62880  
At5g51170  
At1g78780  
At2g21780  
At3g21600  
At5g54520  
At5g07890  
At1g04300  
At1g53790  
At3g51500  
At4g33690  
At2g27490  
At3g05210  
At5g45360  
At3g60300  
At1g56090  
At1g01820  
At3g03120  
At5g59700  
At5g12120  
At3g01850  
At3g50650  
At1g23780

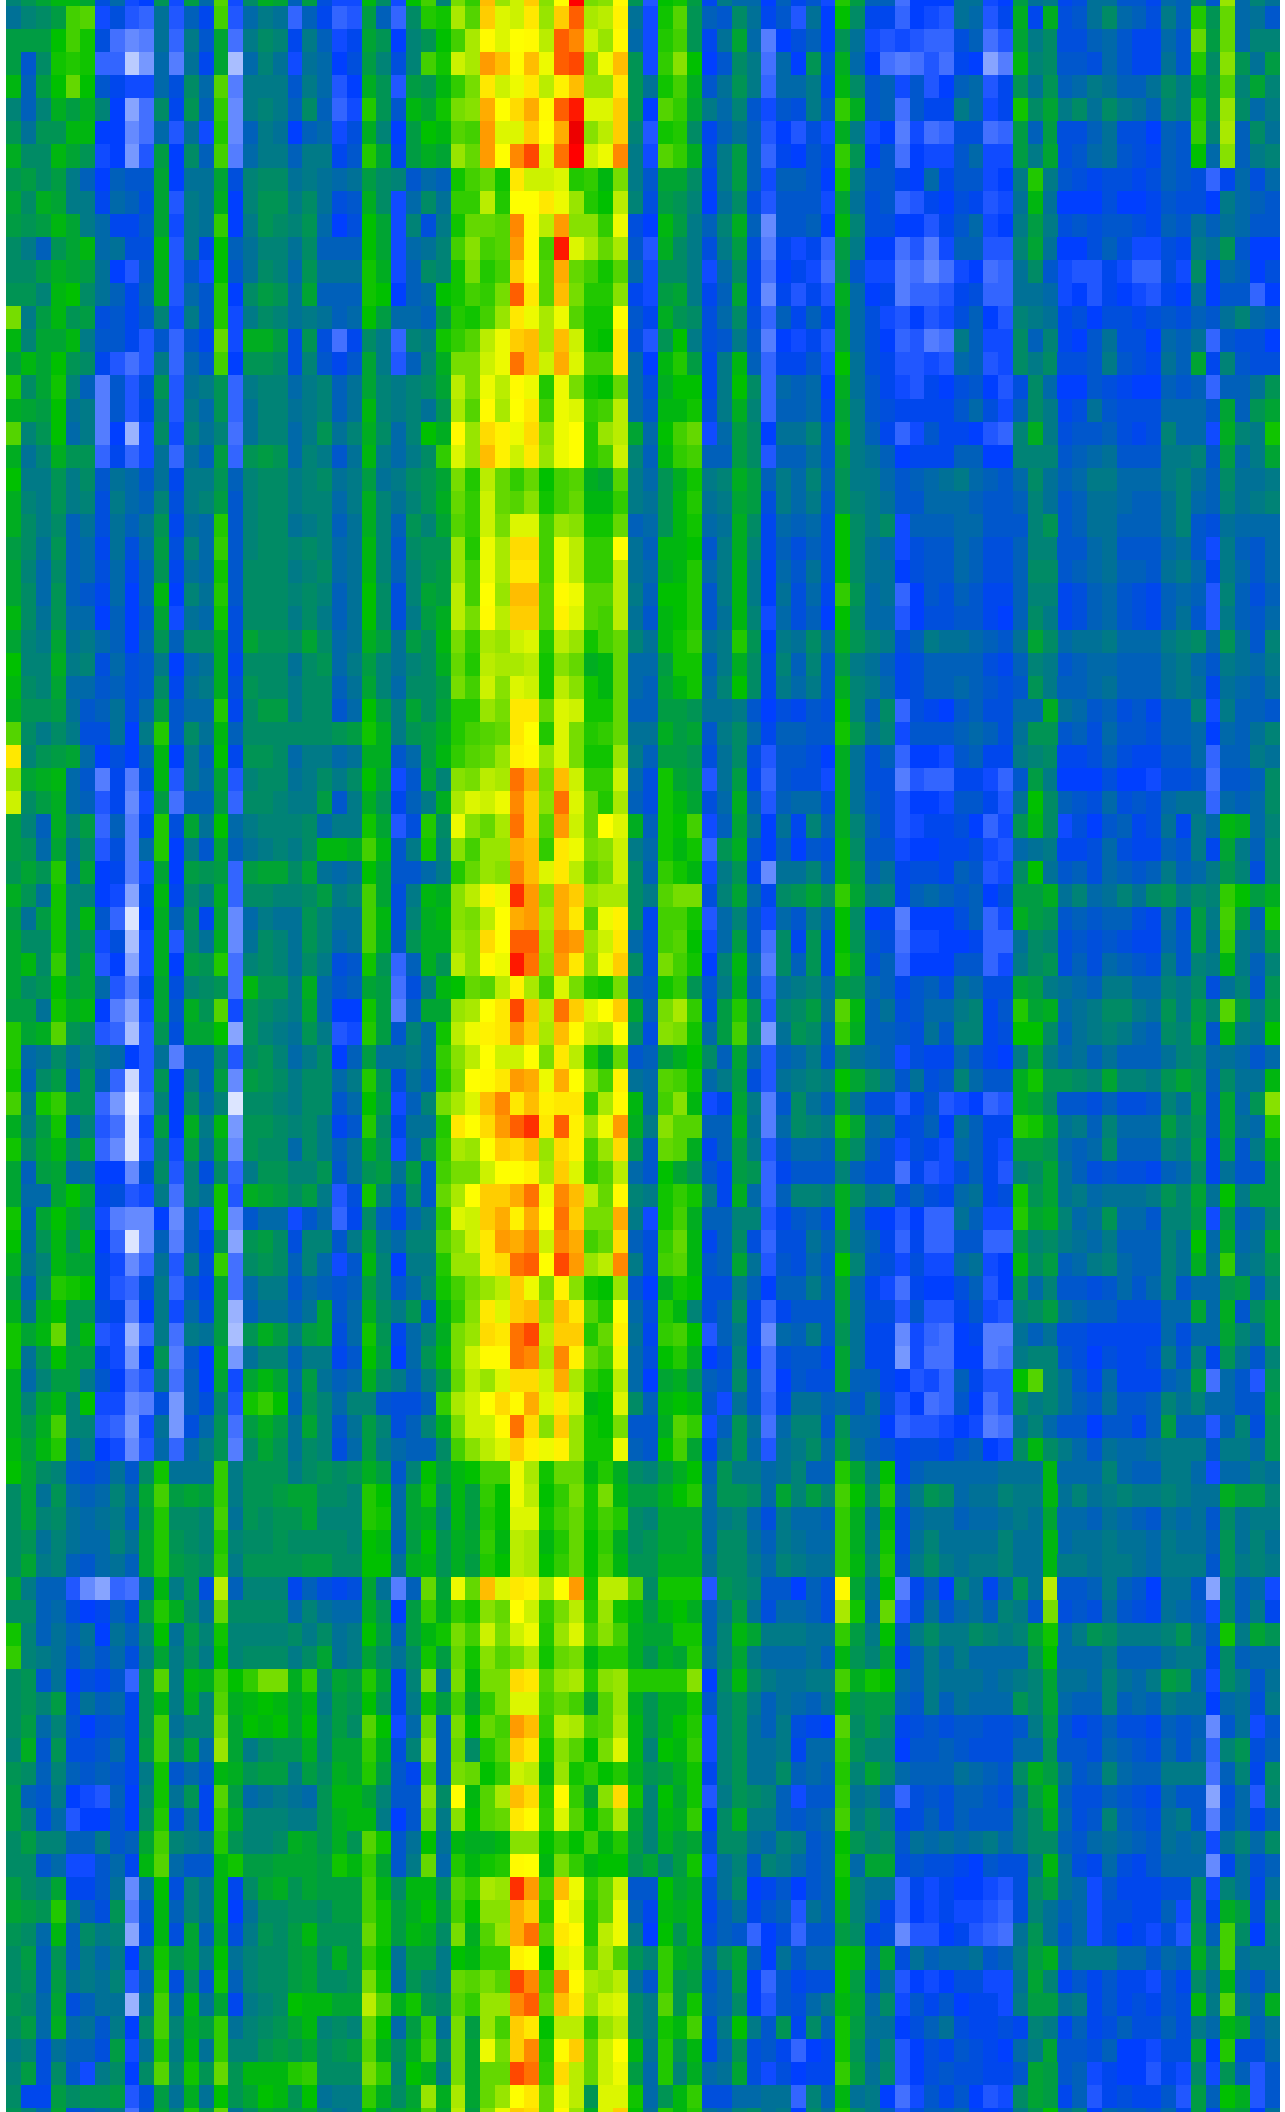

At3g01850  
At3g50650  
At1g23780  
At4g35140  
At5g13570  
At3g05120  
At1g07530  
At1g16850  
At4g33980  
At4g18530  
At3g16190  
At5g07830  
At4g22920  
At1g56600  
At4g18160  
At3g25870  
At3g12580  
At2g47180  
At3g53230  
At1g09140  
At4g25200  
At1g53540  
At1g52560  
At1g16030  
At2g32120  
At5g12030  
At3g46220  
At5g35320  
At2g20560  
At1g74300  
At3g24070  
At2g29380  
At1g07430  
At1g77450  
At1g01720  
At1g02850  
At5g61510  
At1g71950  
At1g31480  
At3g02740  
At1g22985  
At3g61980  
At3g02875  
At5g62620  
At5g04410  
At3g10020  
At1g77000  
At1g16540  
At1g78420  
At5g10300  
At4g13630  
At4g15475  
At4g31540  
At5g57900  
At5g05230  
At3g16990  
At4g13160  
At1g70590  
At3g19990  
At4g33240  
At1g76050  
At5g51740  
At5g17850  
At1g18310  
At3g26480  
At3g26150  
At3g05540  
At3g45820  
At3g43310  
At3g29787  
At5g14840  
At3g63350  
At2g25370  
At1g11370  
At2g04063  
At3g06630  
At2g13230  
At5g38530  
At2g11130  
At5g01440  
At3g20140  
At3g20660  
At5g49690  
At5g06370  
At5g10140  
At1g23050  
At1g80570  
At1g44414  
At1g13640  
At3g54510  
At5g44250

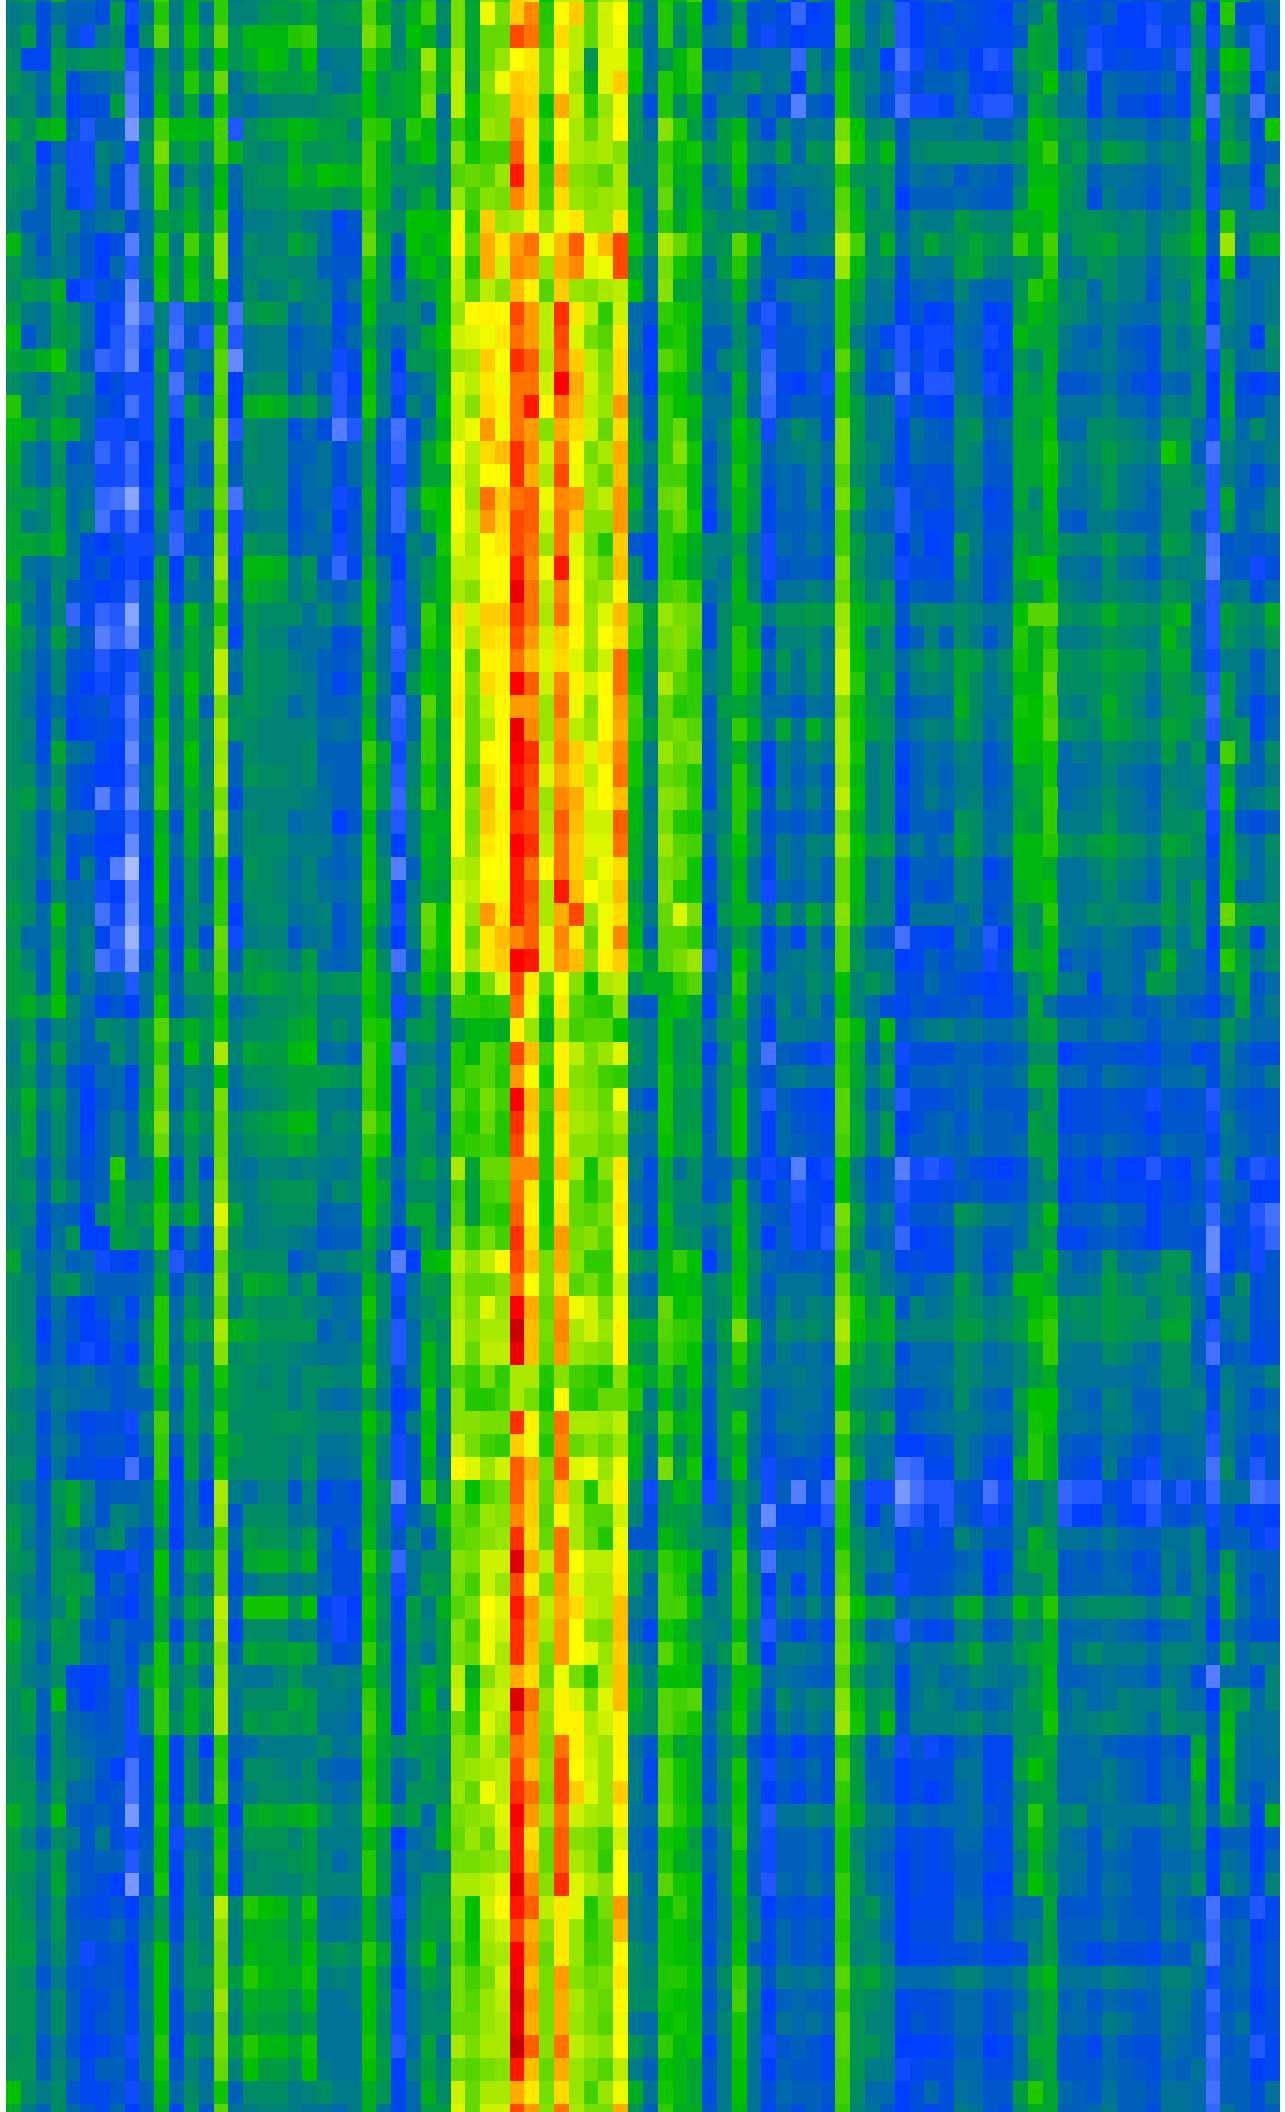

At1g13640  
At3g54510  
At5g44250  
At5g14180  
At5g49700  
At1g73730  
At4g01410  
At5g42690  
At5g24910  
At1g27590  
At4g10070  
At1g17520  
At4g18910  
At1g04830  
At1g80010  
At5g66730  
At3g51880  
At1g17145  
At5g40340  
At3g42860  
At3g05510  
At1g80040  
At5g47090  
At5g12310  
At5g07290  
At2g06005  
At5g10510  
At3g15180  
At4g38380  
At5g03070  
At5g25900  
At5g53470  
At5g45160  
At4g30935  
At5g58210  
At1g17640  
At2g19930  
At3g12490  
At5g49990  
At1g03770  
At3g53970  
At5g65750  
At1g67600  
At4g21680  
At4g10490  
At5g65070  
At4g01970  
At2g20770  
At2g27940  
At4g22100  
At5g56100  
At5g59340  
At1g74360  
At5g52420  
At1g03030  
At3g03790  
At1g03470  
At5g24970  
At4g04870  
At3g29420  
At5g07200  
At3g14360  
At1g67100  
At5g44120  
At1g33490  
At5g09990  
At2g38820  
At3g20910  
At5g18250  
At5g16630  
At5g12840  
At5g53220  
At4g16250  
At5g44280  
At1g52920  
At3g23340  
At1g69295  
At1g19540  
At3g01650  
At4g16620  
At4g27460  
At4g27780  
At2g18340  
At4g36600  
At5g58160  
At4g12130  
At3g15280  
At5g04500  
At2g25890  
At4g39130  
At3g02990  
At4g46850

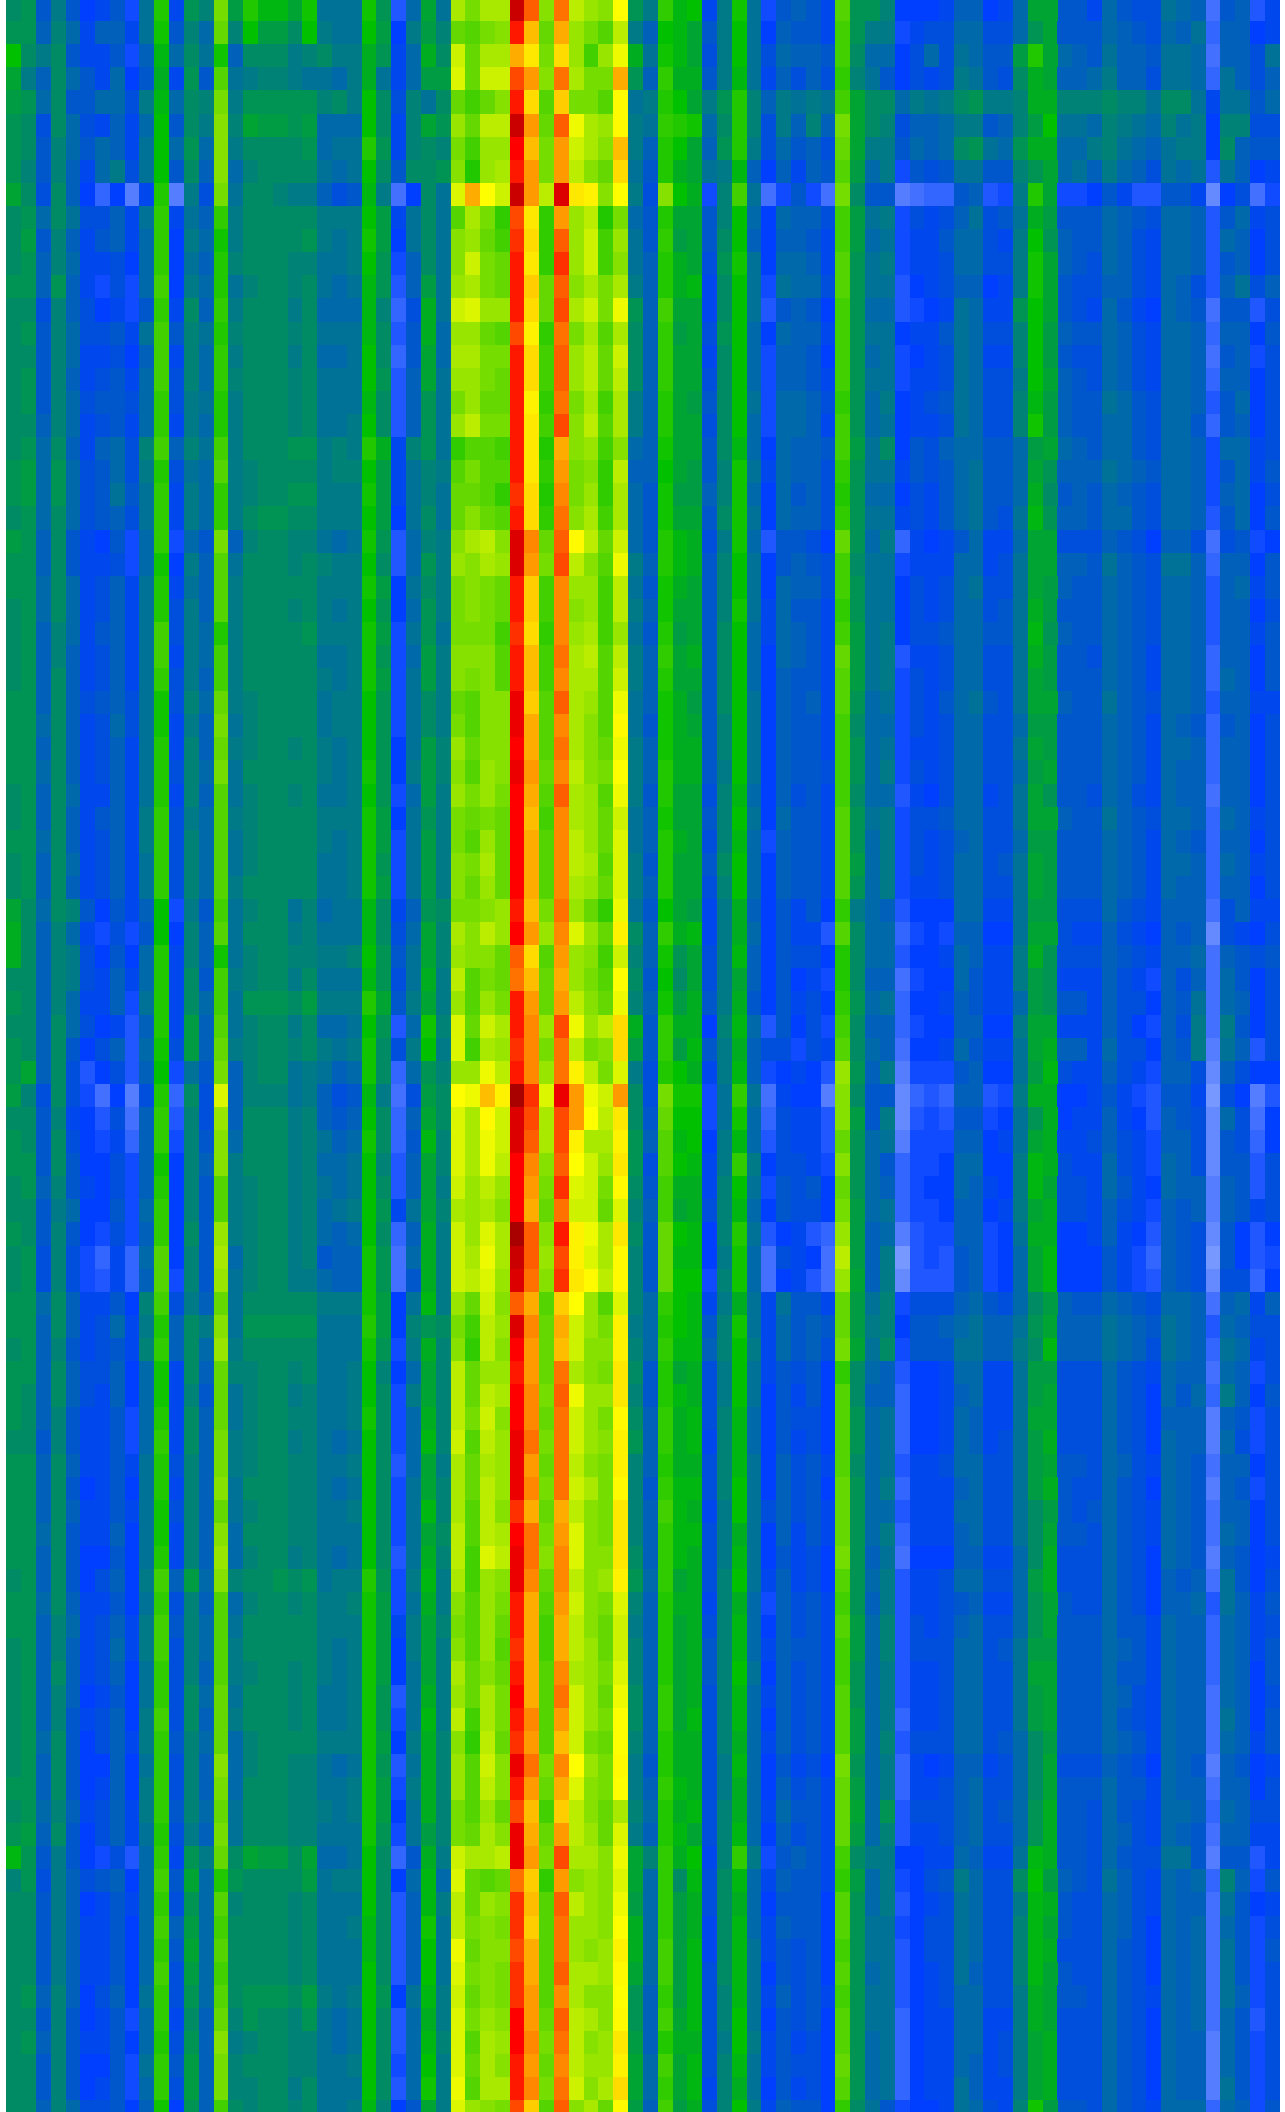

At2g25890  
At4g39130  
At3g02990  
At1g48850  
At4g36620  
At1g69800  
At3g27870  
At5g03180  
At4g21020  
At2g42560  
At1g17810  
At4g31830  
At2g02120  
At4g27160  
At4g27140  
At1g03880  
At2g28490  
At1g47540  
At4g26740  
At2g34315  
At3g61040  
At1g75490  
At2g33520  
At4g09610  
At5g60760  
At5g55750  
At4g27530  
At1g14950  
At1g05510  
At5g45690  
At1g80090  
At5g43770  
At1g02700  
At5g60220  
At5g01300  
At2g23640  
At1g29680  
At5g01670  
At1g27980  
At5g50360  
At5g06760  
At1g52690  
At5g66400  
At2g47770  
At1g62710  
At1g03790  
At1g77950  
At5g44310  
At2g40170  
At3g51810  
At1g14930  
At4g10030  
At3g17520  
At2g36640  
At4g09600  
At3g12960  
At2g05580  
At5g50170  
At2g14520  
At2g23110  
At5g47810  
At5g07330  
At2g21820  
At5g55240  
At3g58450  
At1g14940  
At3g22500  
At1g72100  
At1g22600  
At1g24735  
At2g19900  
At3g05260  
At3g50980  
At5g22470  
At3g56350  
At2g33070  
At3g53040  
At3g21370  
At5g42290  
At5g16460  
At4g16160  
At4g28520  
At1g65090  
At2g27380  
At5g54740  
At3g22640  
At1g54870  
At2g21490  
At2g28420  
At5g62490  
At3g54940  
At1g32560

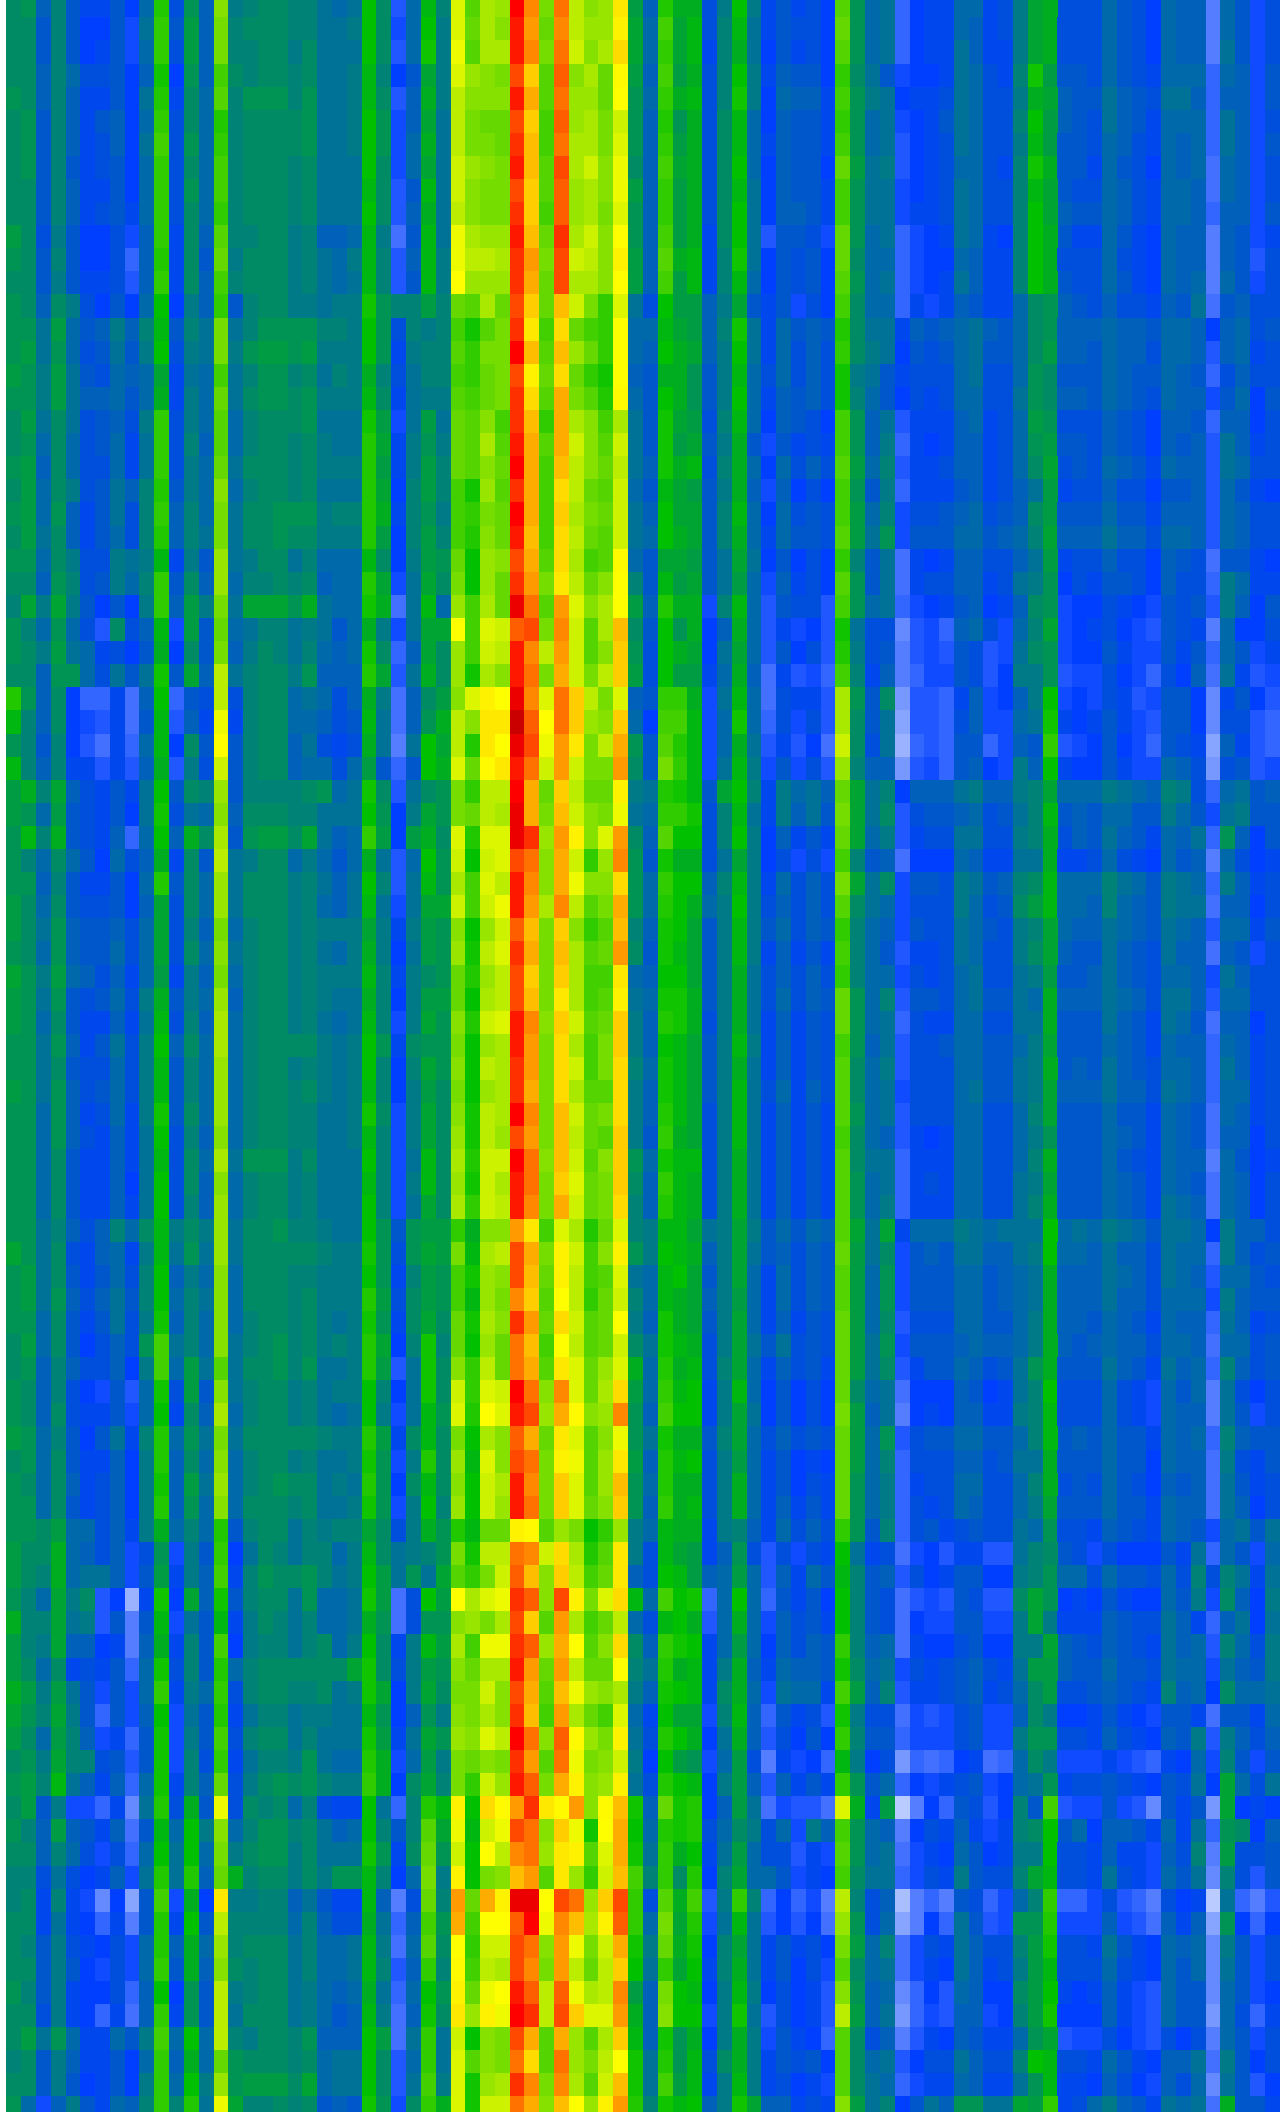

At2g28420  
At5g62490  
At3g54940  
At1g32560  
At3g11050  
At3g01570  
At1g04560  
At1g73190  
At4g25140  
At3g27660  
At5g40420  
At3g15670  
At1g48130  
At5g52300  
At1g66770  
At1g08170  
At5g05220  
At1g30860  
At5g57550  
At5g45310  
At5g66110  
At5g50240  
At2g25340  
At1g16770  
At2g29300  
At4g03200  
At3g15260  
At4g25170  
At2g38465  
At3g59580  
At5g54000  
At3g22490  
At1g12130  
At1g17010  
At2g42950  
At5g39720  
At3g07565  
At1g16730  
At5g57790  
At2g36270  
At4g26050  
At5g57260  
At5g04010  
At2g34740  
At2g03520  
At1g03990  
At5g18450  
At5g66430  
At5g65550  
At3g21380  
At1g23070  
At5g51760  
At2g42000  
At3g16120  
At5g64210  
At5g54070  
At5g25180  
At4g25580  
At5g35660  
At3g48580  
At5g04000  
At2g23240  
At1g15330  
At1g70840  
At3g03620  
At4g02690  
At2g43580  
At1g46768  
At5g23230  
At1g27300  
At1g72680  
At5g07360  
At3g12955  
At1g07500  
At2g33590  
At4g02280  
At5g63030  
At5g05320  
At2g41260  
At5g14180  
At1g64110  
At5g03860  
At2g35300  
At1g75830  
At2g15010  
At5g66780  
At3g19920  
At2g41280  
At3g44830  
At3g24650  
At5g24130  
At5g08470



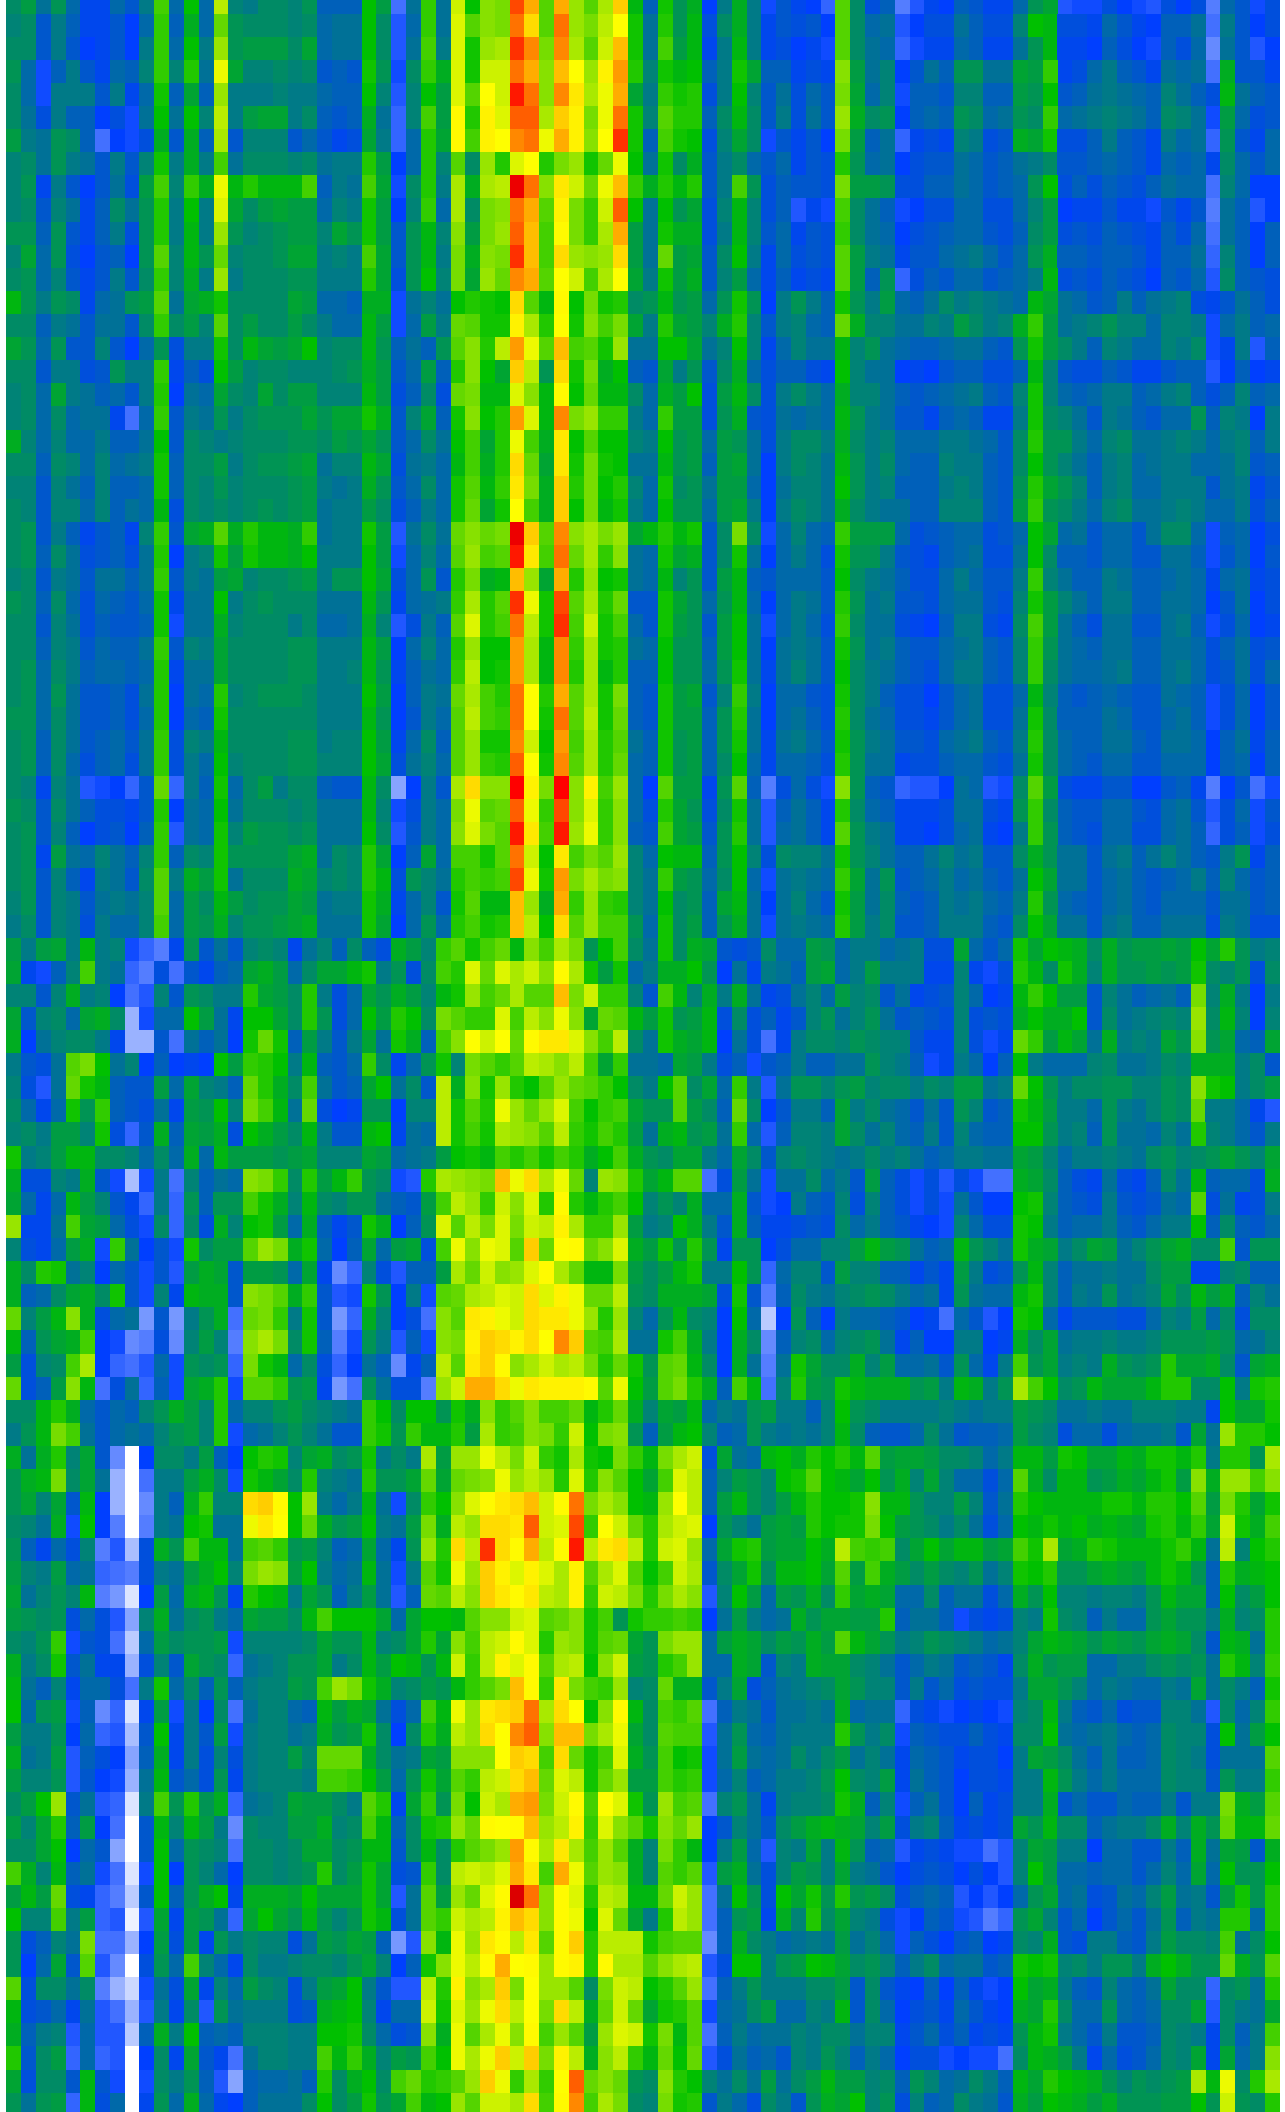

At3g44830  
At3g24650  
At5g24130  
At5g08470  
At5g19150  
At1g15230  
At2g43500  
At5g38780  
At5g55470  
At5g17570  
At5g65100  
At1g28640  
At3g14880  
At4g33280  
At1g30100  
At5g23790  
At1g70985  
At3g30510  
At5g60460  
At1g18090  
At1g60970  
At5g51210  
At4g00220  
At2g38905  
At3g18570  
At1g62290  
At3g03240  
At4g36700  
At5g62800  
At1g03890  
At1g26400  
At2g19320  
At5g59170  
At4g18650  
At4g27150  
At4g27170  
At1g54860  
At3g49300  
At5g03800  
At5g50770  
At3g25260  
At1g15220  
At5g23050  
At1g73220  
At5g57655  
At5g61230  
At4g29900  
At5g08750  
At4g16130  
At1g06520  
At1g27160  
At5g51040  
At1g32740  
At1g01770  
At1g80780  
At5g62910  
At5g55700  
At5g66810  
At5g08535  
At1g17490  
At1g77800  
At4g00800  
At4g00790  
At4g08320  
At1g59610  
At3g22290  
At3g50000  
At5g46840  
At3g44690  
At3g51100  
At3g26130  
At4g29330  
At5g03340  
At1g17090  
At5g20960  
At3g26770  
At1g49390  
At1g60680  
At2g16595  
At3g52570  
At5g17190  
At4g09030  
At2g45290  
At4g03320  
At4g12340  
At5g59140  
At2g05710  
At5g27410  
At1g13590  
At2g24260  
At4g24520  
At5g18110

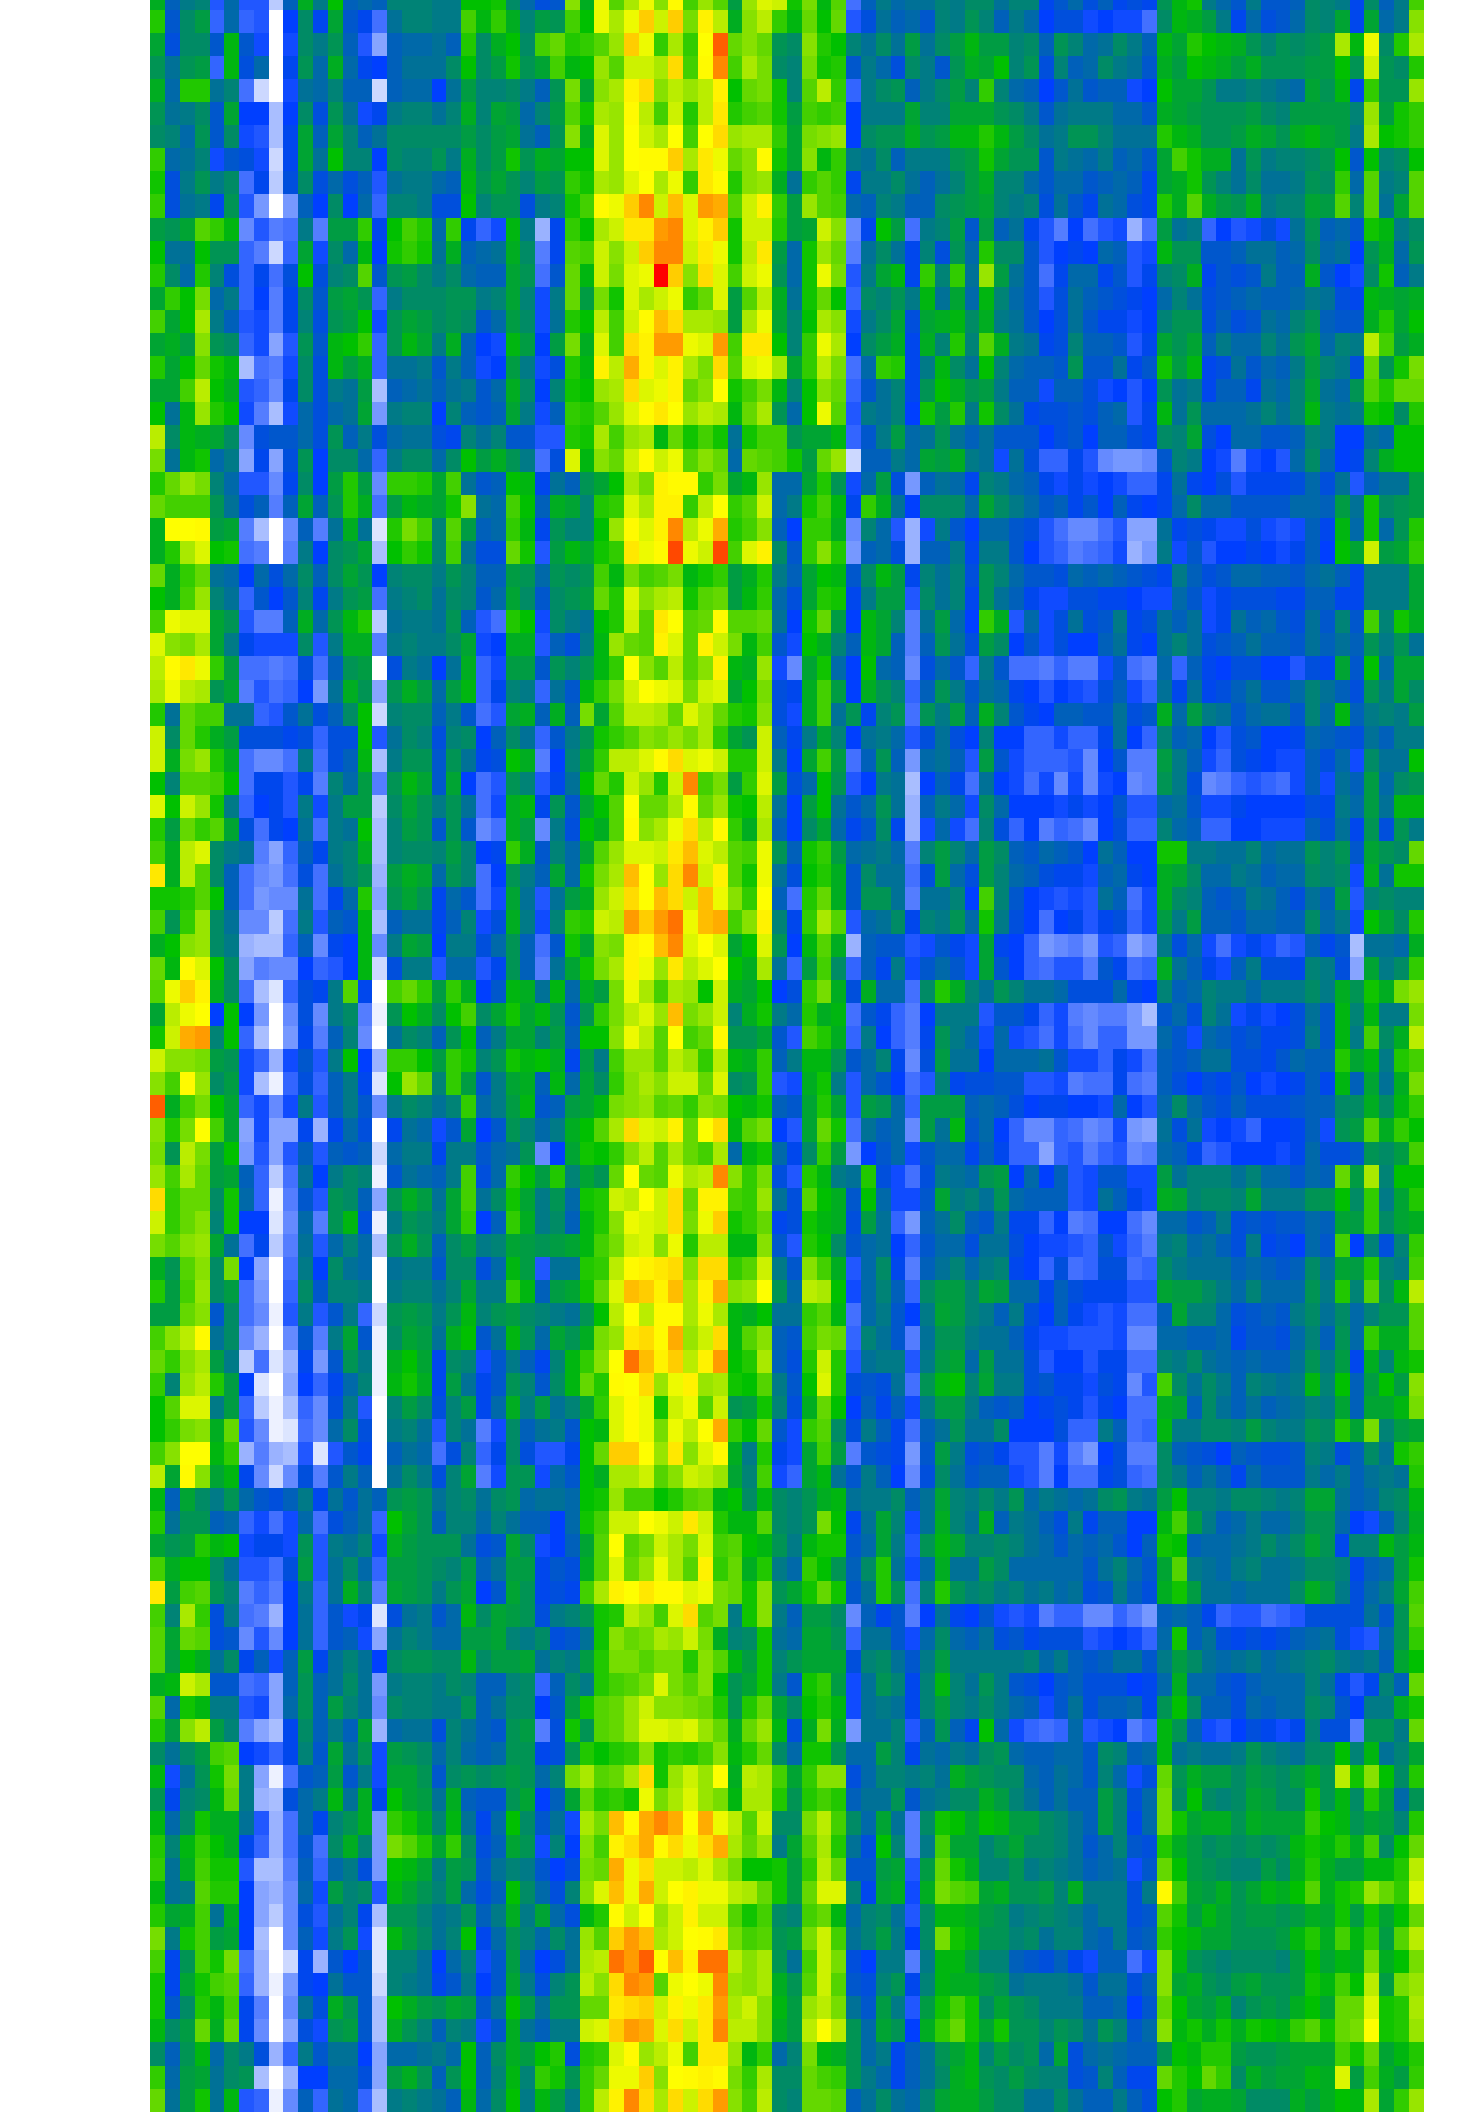

At1g33260  
At2g24260  
At4g24520  
At5g18110  
At3g09840  
At1g33055  
At5g39890  
At3g03170  
At1g50420  
At5g47720  
At1g32530  
At3g06810  
At2g38330  
At5g62520  
At2g02230  
At4g02880  
At1g74250  
At5g25070  
At2g45500  
At1g04770  
At1g15170  
At5g04250  
At4g38940  
At4g30600  
At5g08139  
At3g09350  
At5g52640  
At5g23850  
At3g56880  
At4g08500  
At5g48655  
At3g47060  
At2g03540  
At2g22010  
At2g37520  
At5g63330  
At1g62310  
At4g25520  
At3g12980  
At1g64140  
At5g44090  
At3g24180  
At5g60410  
At1g59820  
At4g12040  
At5g45130  
At3g11420  
At4g25230  
At3g62260  
At1g50600  
At1g60730  
At1g67310  
At1g13880  
At4g33940  
At2g33700  
At1g77370  
At2g29060  
At1g43890  
At3g10800  
At5g42940  
At1g15780  
At5g63370  
At4g21560  
At3g07780  
At3g08760  
At3g04390  
At2g16890  
At2g07697  
At5g65140  
At3g14075  
At2g47890  
At3g50970  
At5g51830  
At3g11580  
At3g13330  
At4g37430  
At1g54340  
At4g05530  
At3g61710  
At4g11860  
At5g59210  
At4g01290  
At5g07920  
At3g61560  
At3g49490  
At3g27670  
At2g43250  
At5g23090  
At1g11360  
At3g07020  
At4g01120

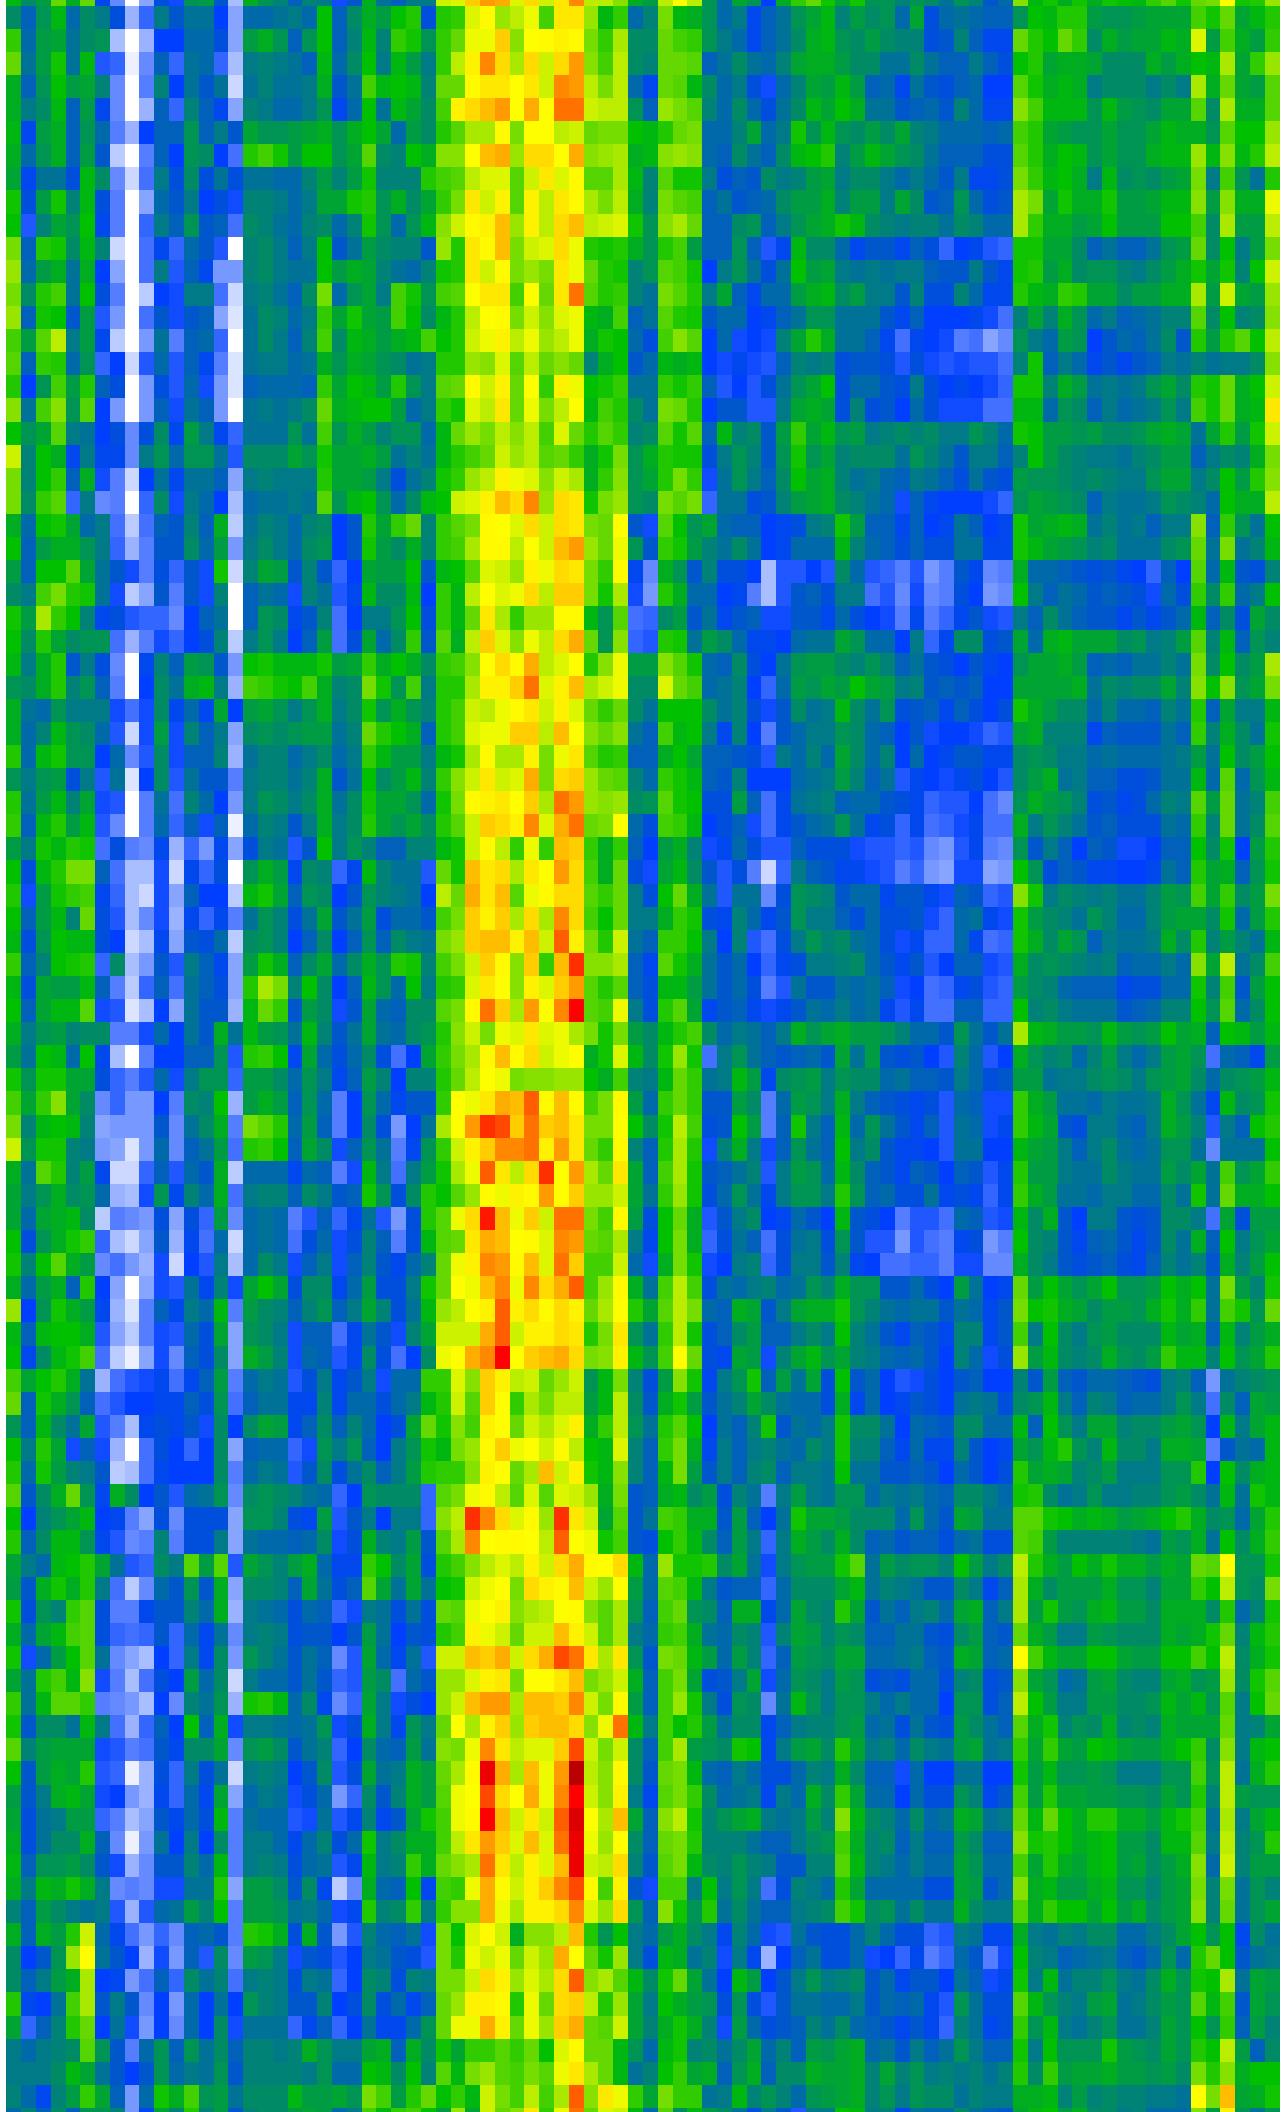

At1g11360  
At3g07020  
At4g01120  
At2g23980  
At5g63640  
At4g11270  
At4g32850  
At2g25940  
At5g56240  
At3g05090  
At4g30080  
At4g29230  
At4g39910  
At4g11220  
At1g20110  
At5g64240  
At3g16857  
At1g13195  
At1g76900  
At1g60750  
At5g06750  
At1g34370  
At3g08850  
At5g15020  
At1g55680  
At3g51370  
At3g51110  
At1g30200  
At4g31750  
At2g17030  
At2g36810  
At3g01100  
At3g19290  
At1g19530  
At4g13030  
At3g20250  
At1g76990  
At2g35680  
At5g43560  
At1g13450  
At5g50230  
At5g64930  
At1g18260  
At1g33050  
At1g76850  
At4g20330  
At2g07712  
At5g52530  
At5g55310  
At5g04540  
At5g14270  
At4g17110  
At4g20850  
At3g52850  
At1g02890  
At3g54380  
At3g53390  
At4g29490  
At4g29500  
At1g36730  
At2g44710  
At5g01010  
At2g47970  
At4g17120  
At3g60850  
At4g28260  
At3g51120  
At2g36840  
At1g07990  
At5g51770  
At1g10690  
At2g31510  
At1g50570  
At3g27260  
At5g66880  
At1g21160  
At1g05890  
At2g45620  
At4g05420  
At3g14010  
At1g67570  
At4g33210  
At3g13340  
At1g23960  
At3g58170  
At3g19520  
At1g25420  
At3g14750  
At4g32960  
At1g64270  
At3g53210

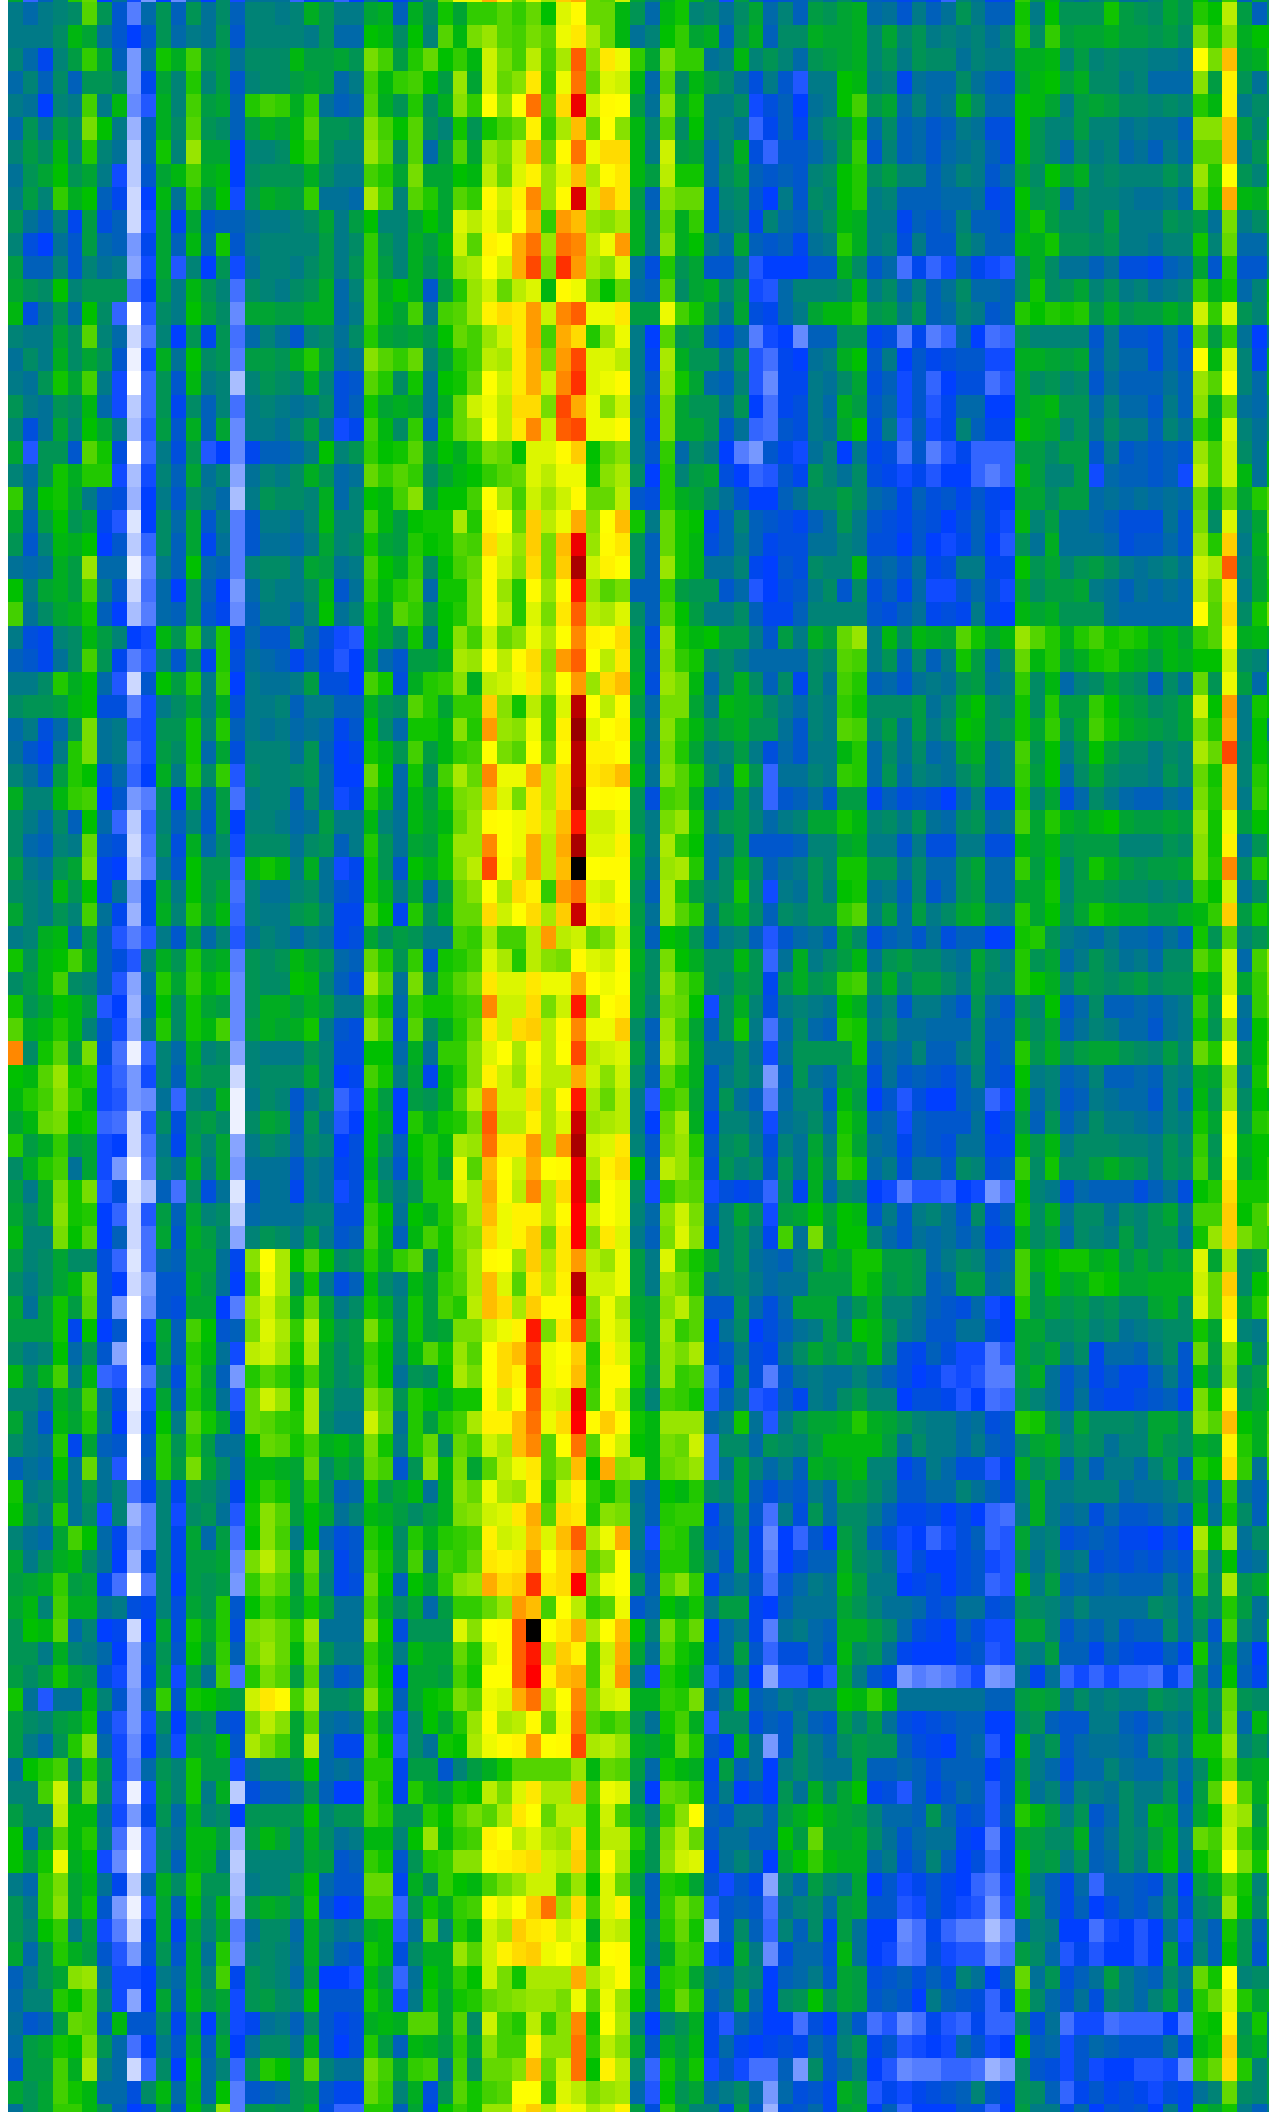

At4g32960  
At1g64270  
At3g53210  
At4g17730  
At3g10770  
At2g26210  
At4g05000  
At1g76185  
At4g12570  
At4g27450  
At1g06110  
At5g63190  
At5g37710  
At1g11020  
At1g06400  
At3g07760  
At2g19350  
At5g23460  
At2g21240  
At5g10860  
At2g04240  
At5g24320  
At3g12250  
At1g49850  
At4g09840  
At1g28330  
At2g33310  
At5g42520  
At5g42190  
At5g11860  
At3g09880  
At4g15780  
At5g35330  
At1g72650  
At1g36070  
At2g01080  
At1g26665  
At2g26430  
At3g21865  
At1g73380  
At4g38580  
At1g76360  
At5g64390  
At4g32160  
At4g29790  
At1g01730  
At4g12020  
At3g63500  
At3g54850  
At2g42400  
At5g59950  
At1g43700  
At3g48860  
At1g45976  
At3g58040  
At3g11100  
At3g09320  
At5g05100  
At5g18900  
At1g75400  
At4g31420  
At4g34370  
At2g46900  
At5g38650  
At1g55530  
At2g24100  
At3g09770  
At3g24740  
At5g43930  
At3g12350  
At5g63610  
At5g67520  
At1g74410  
At3g15290  
At4g17940  
At1g09910  
At1g61670  
At1g43130  
At1g69340  
At5g20620  
At2g02370  
At2g41705  
At2g27200  
At5g51570  
At4g11740  
At4g27900  
At5g62740  
At2g01270  
At5g65960  
At1g51200  
At2g40830  
At4g26990

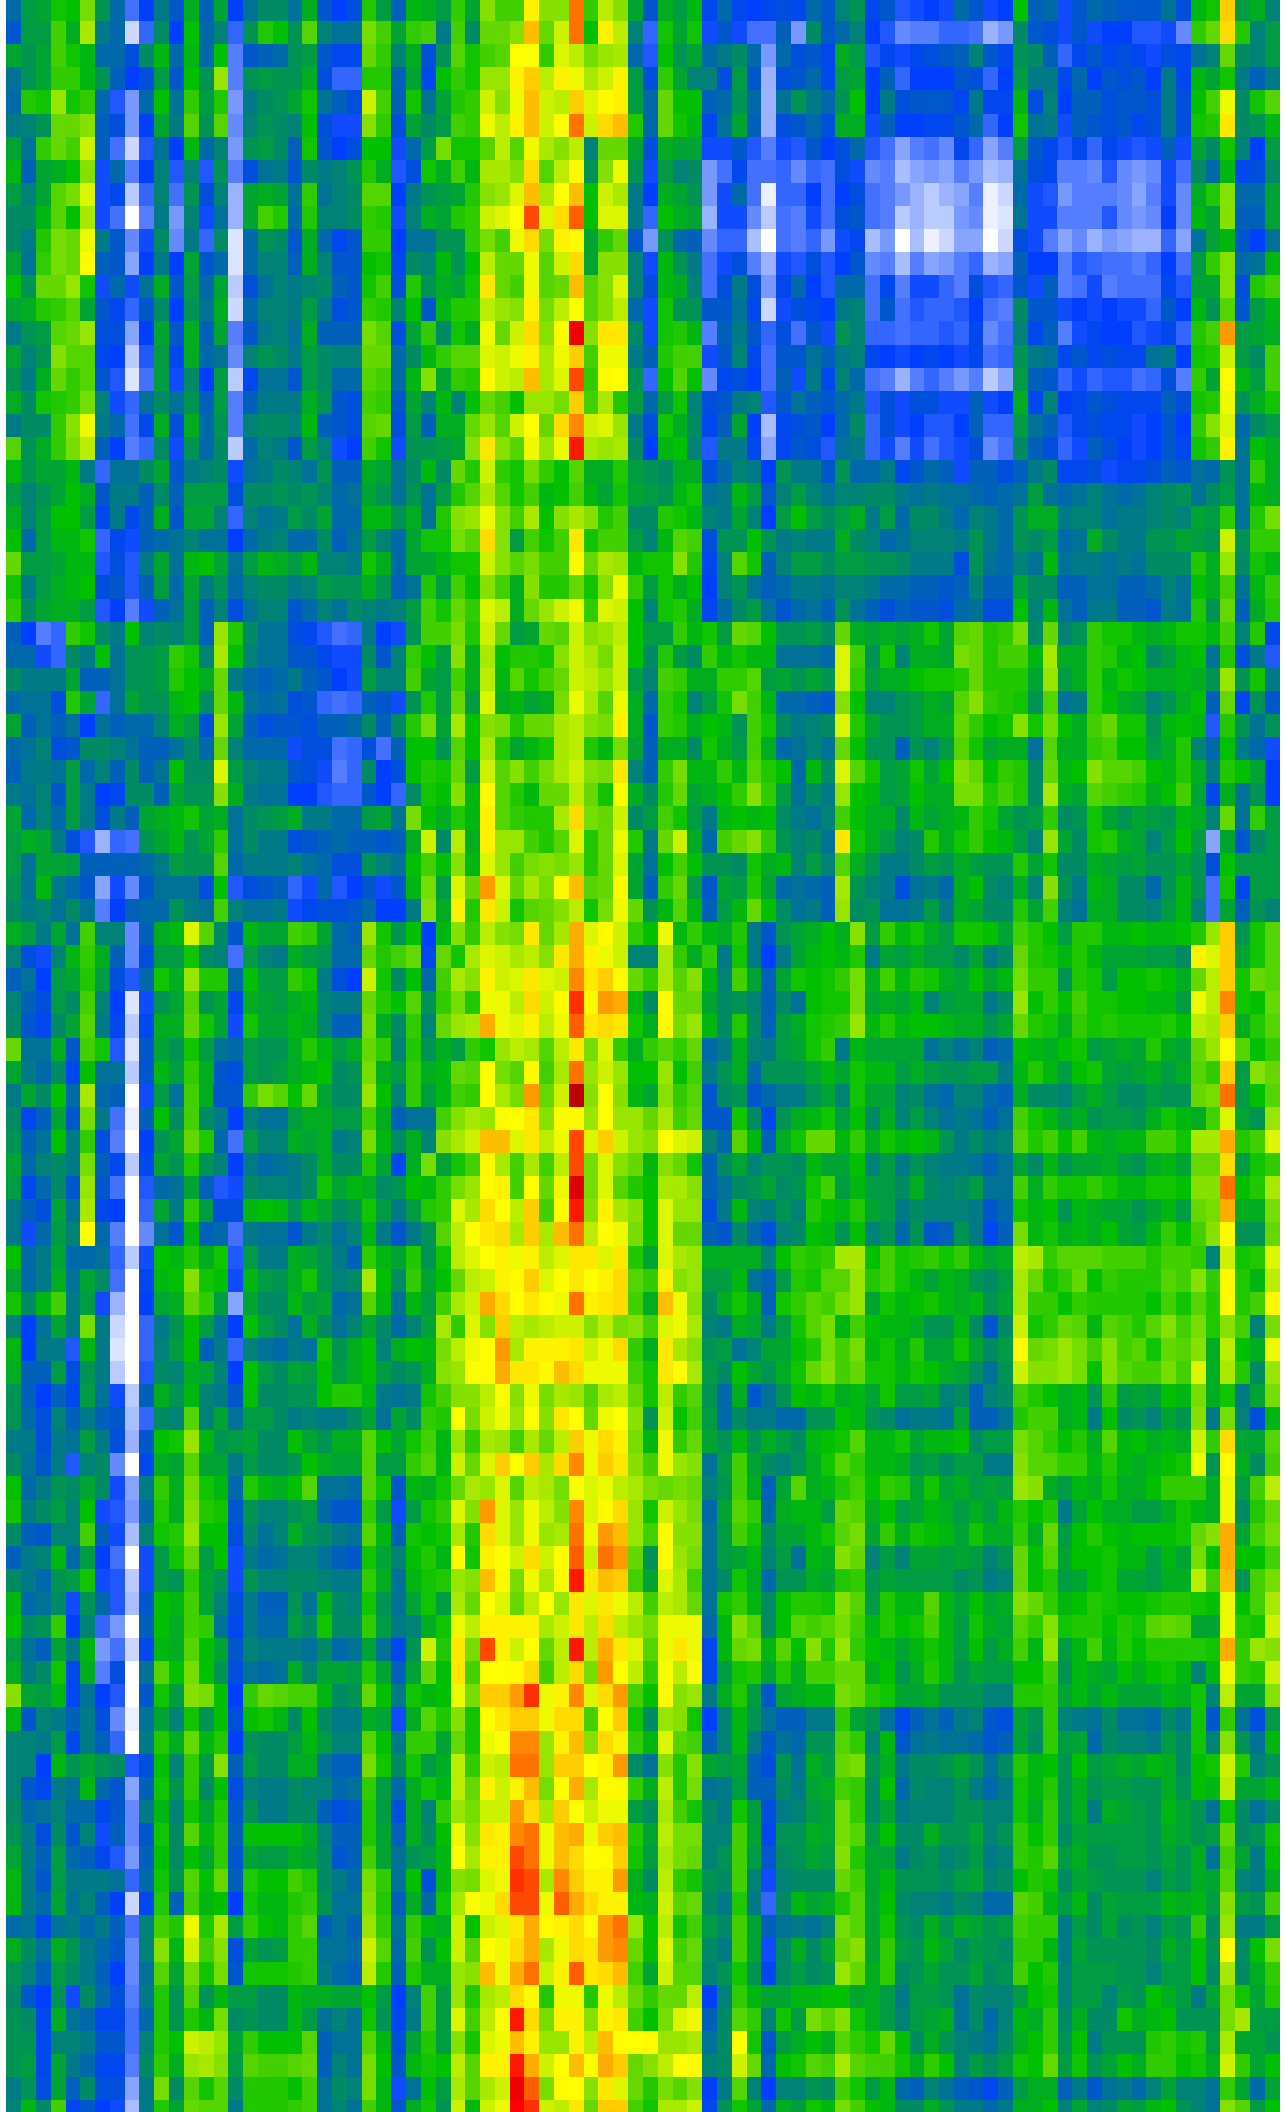

At5g65960  
At1g51200  
At2g40830  
At4g26980  
At1g78140  
At1g56610  
At1g76150  
At1g55850  
At5g61640  
At5g07470  
At3g15580  
At1g54210  
At2g17110  
At4g22340  
At4g29820  
At4g31240  
At1g52320  
At5g63080  
At1g01725  
At1g03970  
At2g16340  
At2g07698  
At2g14850  
At1g56440  
At1g05400  
At5g39100  
At3g28345  
At5g65940  
At1g14920  
At3g60400  
At3g25890  
At2g48160  
At1g27090  
At2g01220  
At1g05750  
At5g14620  
At5g60790  
At2g44950  
At3g13460  
At1g08410  
At1g17410  
At3g54290  
At1g02960  
At3g55530  
At5g42470  
At5g56020  
At5g23380  
At2g36900  
At2g38130  
At5g62950  
At5g60190  
At3g48690  
At5g16470  
At2g36060  
At3g11960  
At5g02310  
At4g11670  
At4g07390  
At2g26510  
At4g22770  
At1g48750  
At1g69600  
At4g36930  
At3g18230  
At1g26620  
At5g27860  
At5g01940  
At5g54430  
At2g18780  
At3g01150  
At4g23910  
At2g44270  
At5g04520  
At4g16100  
At3g20800  
At4g32680  
At5g19430  
At3g03330  
At3g09180  
At4g28020  
At3g07530  
At5g02910  
At2g36960  
At5g06100  
At3g27700  
At3g06290  
At5g15880  
At1g67820  
At5g60610  
At4g38780  
At3g03490  
At5g13310

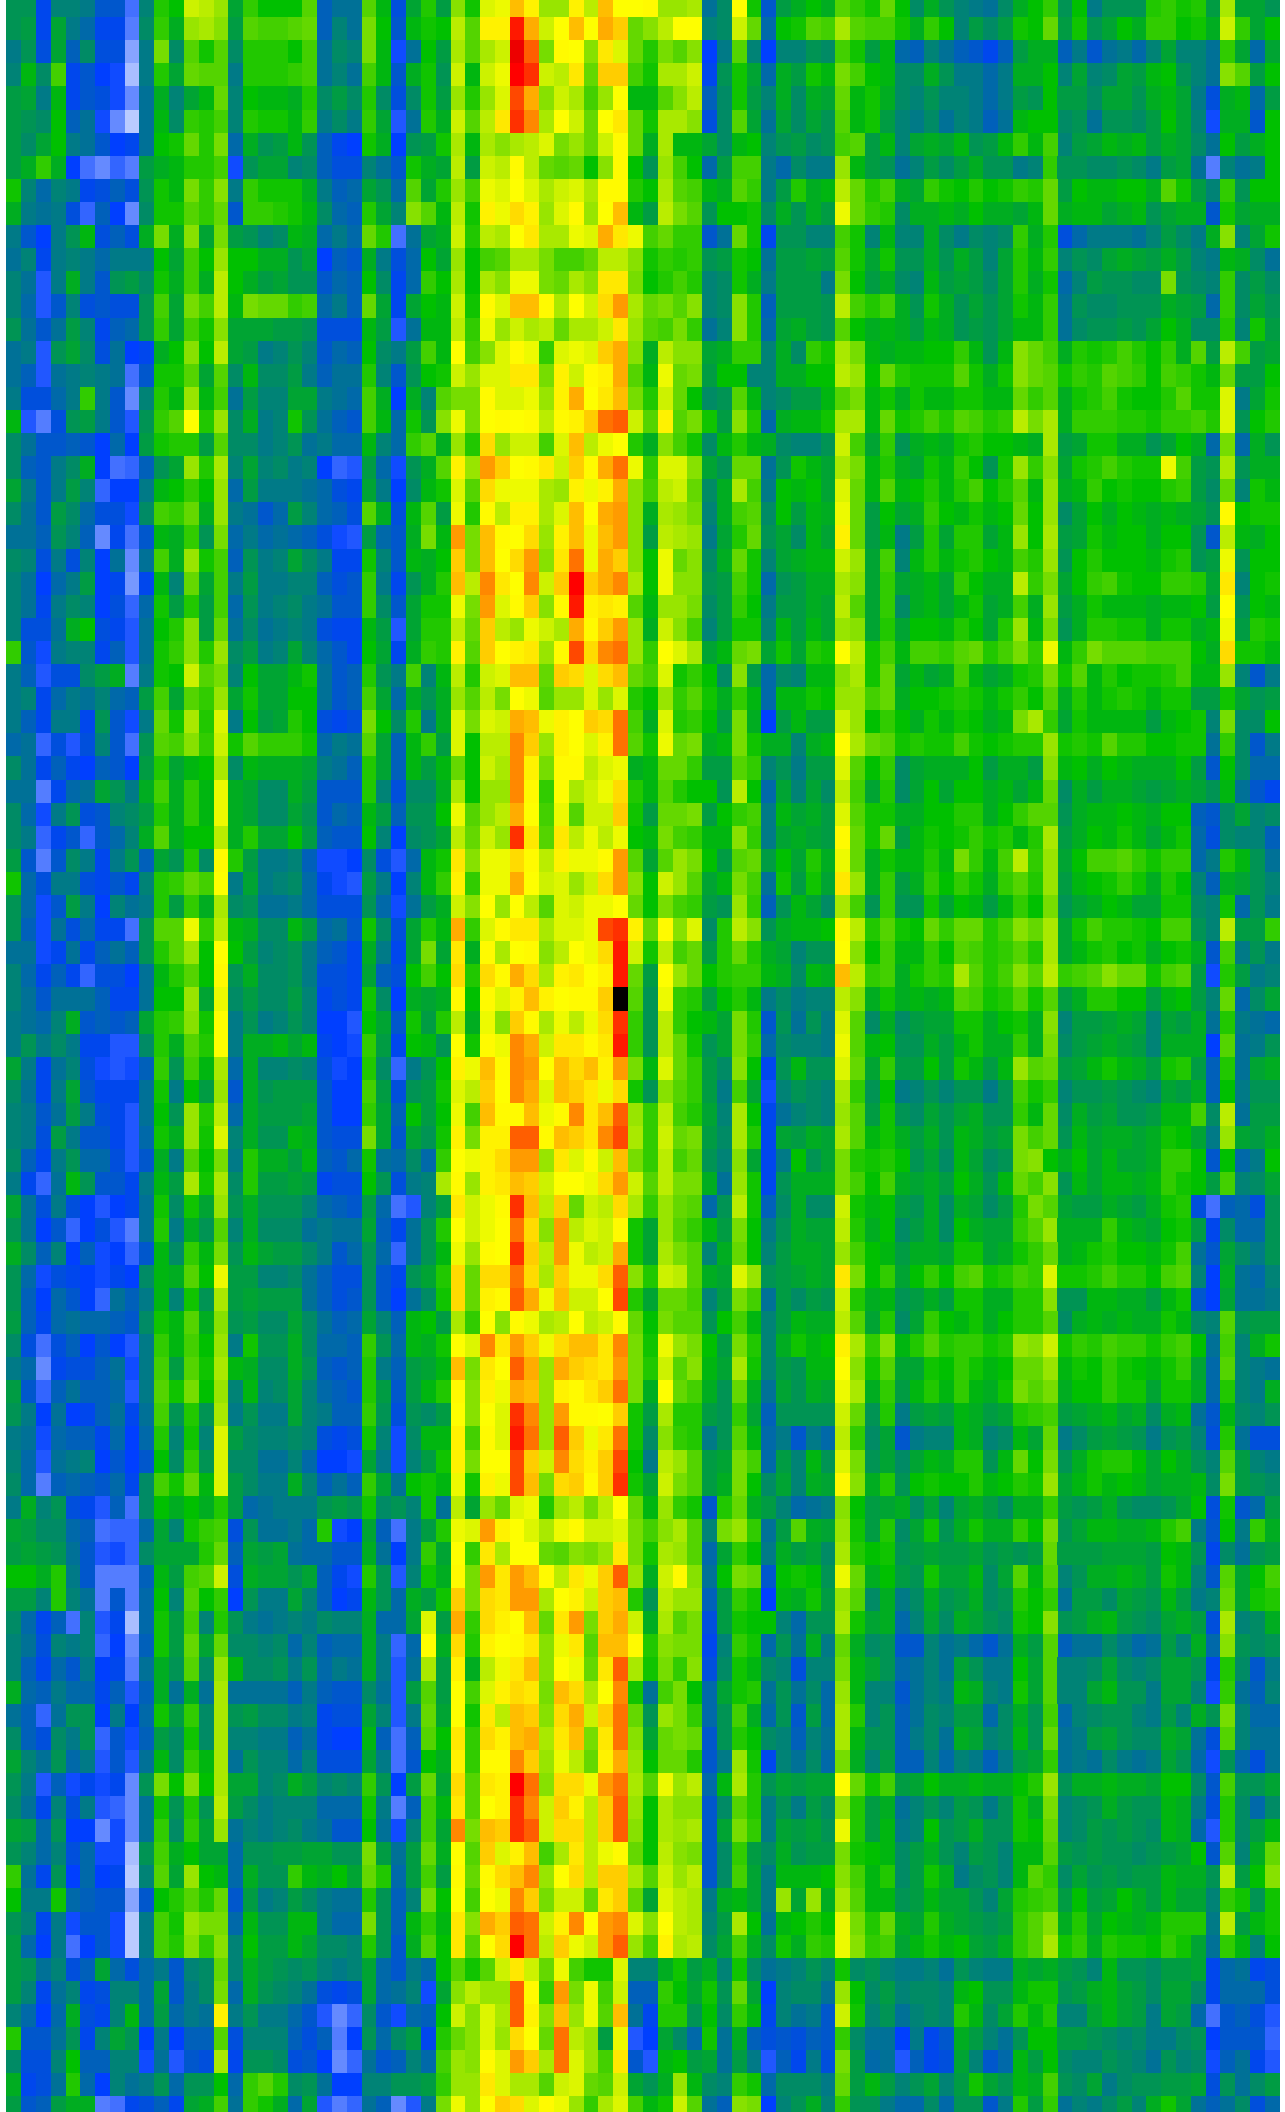

At5g60610  
At4g38780  
At3g03490  
At5g13310  
At5g07380  
At1g55080  
At5g37590  
At1g07030  
At2g18760  
At2g44710  
At5g02130  
At3g25060  
At1g49980  
At1g07910  
At1g77010  
At5g01040  
At1g09420  
At3g45590  
At1g73970  
At1g02060  
At1g17460  
At5g17370  
At1g79190  
At2g17510  
At5g49400  
At3g20550  
At1g79880  
At5g52630  
At4g31010  
At4g10925  
At5g61920  
At1g72390  
At5g63460  
At3g14160  
At2g21195  
At5g22820  
At1g03270  
At5g53080  
At5g10070  
At1g55630  
At2g04740  
At1g73320  
At5g08540  
At5g14960  
At1g59510  
At4g29000  
At1g24706  
At5g55390  
At2g20400  
At2g40770  
At2g32910  
At4g09340  
At1g17140  
At2g02850  
At1g77360  
At1g09810  
At3g13350  
At5g24340  
At2g30800  
At5g01390  
At1g29220  
At2g32000  
At2g06010  
At3g29090  
At5g20510  
At1g13870  
At4g33060  
At4g12250  
At3g18100  
At4g16440  
At2g47420  
At5g39850  
At3g61530  
At4g26000  
At2g38450  
At5g07950  
At1g77570  
At2g42450  
At4g01790  
At3g63410  
At3g02860  
At5g47430  
At5g52070  
At4g23840  
At5g27210  
At5g17530  
At2g22240  
At4g18130  
At1g68020  
At3g45900  
At5g43130  
At5g40930

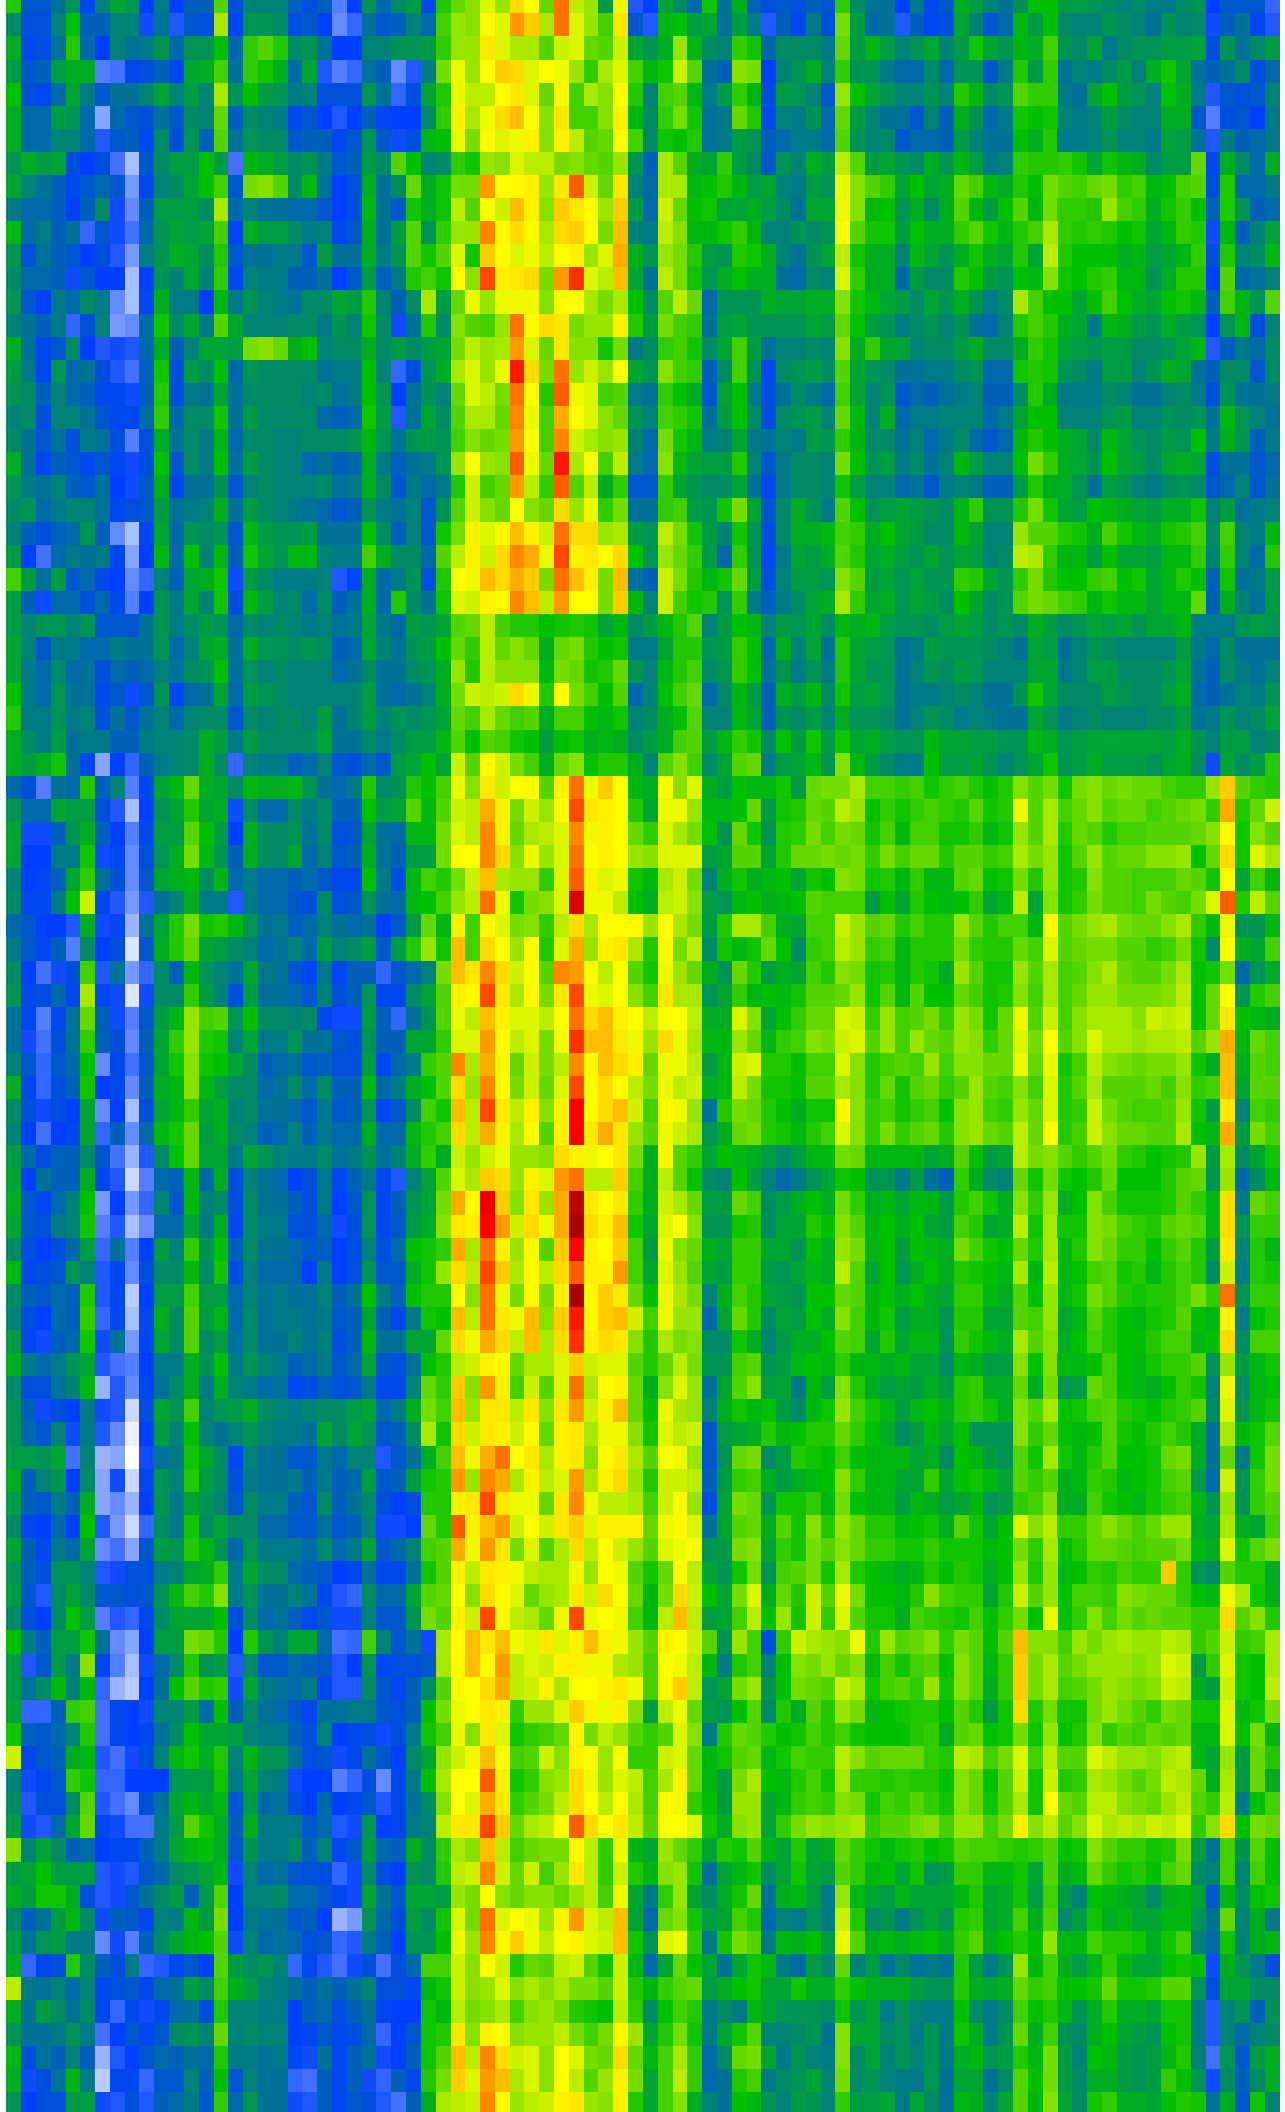

At1g66020  
At3g45900  
At5g43130  
At5g40930  
At2g39170  
At4g27680  
At2g46730  
At4g23630  
At3g06190  
At3g50880  
At3g21290  
At3g20650  
At1g27650  
At3g02260  
At5g39410  
At4g32920  
At3g47950  
At2g41070  
At3g58200  
At4g23930  
At1g13740  
At4g32290  
At4g28330  
At1g31830  
At3g21430  
At3g57880  
At5g44670  
At2g07677  
At1g54050  
At1g30070  
At4g21323  
At2g25140  
At1g66080  
At3g44110  
At5g66240  
At3g45190  
At2g41020  
At5g03770  
At5g14080  
At4g26620  
At5g55140  
At4g11240  
At4g21110  
At1g07170  
At5g06240  
At4g20280  
At2g34750  
At4g28830  
At2g36930  
At2g33340  
At1g09960  
At4g10610  
At2g37340  
At4g32910  
At1g23860  
At5g06950  
At5g59440  
At1g30880  
At1g09280  
At1g48390  
At4g39520  
At4g37870  
At5g15120  
At2g32070  
At2g32600  
At5g42060  
At5g11760  
At5g58590  
At2g45460  
At5g26760  
At1g44810  
At5g26610  
At2g01060  
At2g33730  
At5g66820  
At5g63690  
At5g46460  
At1g01290  
At1g21190  
At5g43820  
At1g14090  
At4g08220  
At5g04670  
At3g07740  
At5g64730  
At3g60340  
At1g13630  
At3g02330  
At1g77230  
At1g11710  
At5g65720  
At3g57710

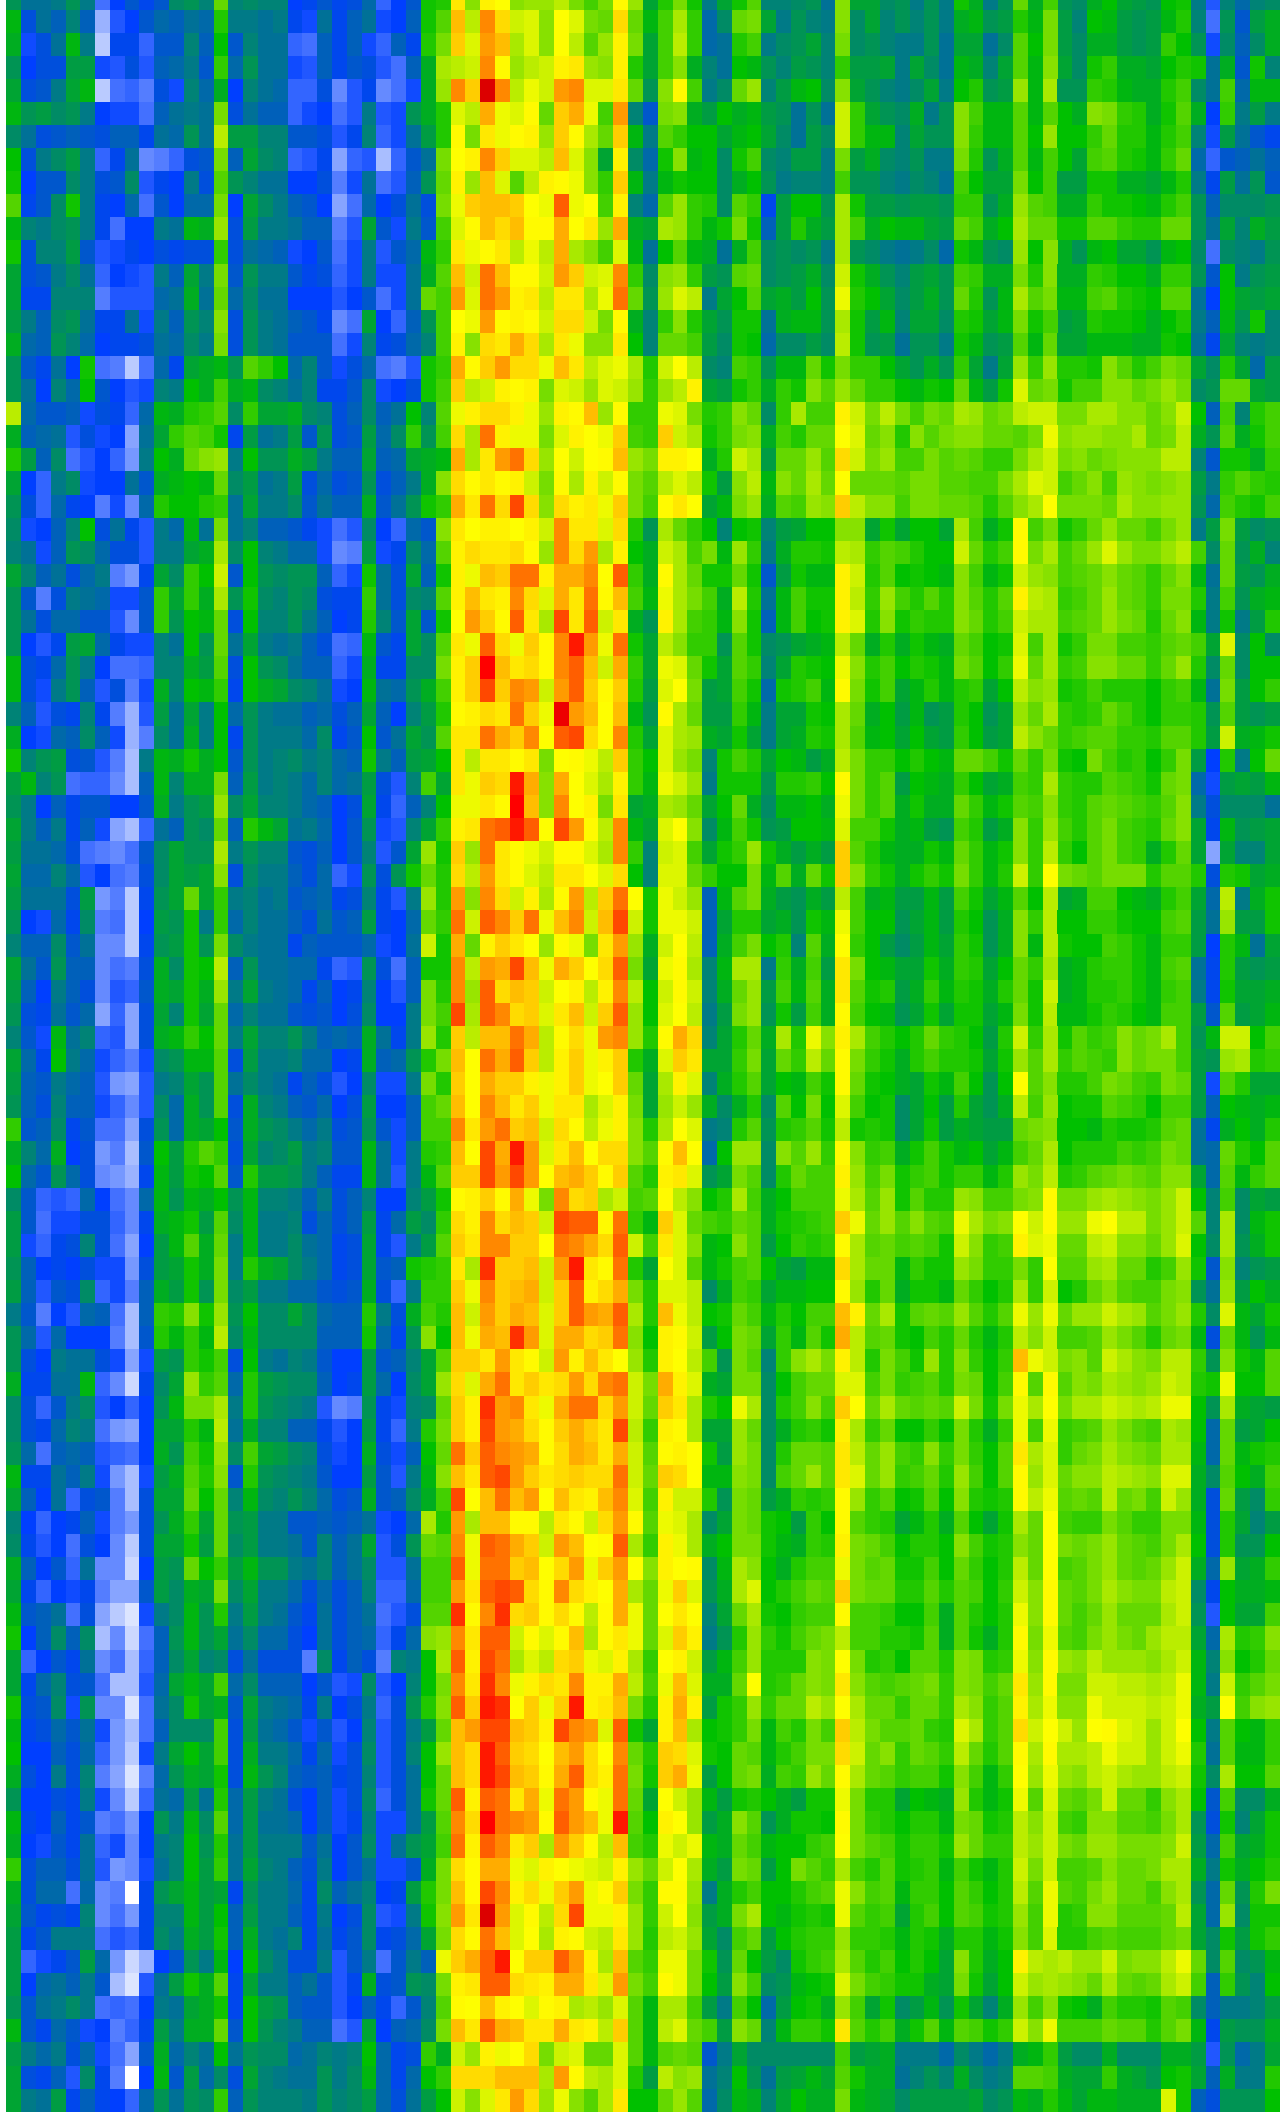

At1g11710  
At5g65720  
At3g57710  
At3g56510  
At1g13195  
At5g05550  
At1g01930  
At5g67570  
At5g25520  
At1g14660  
At1g64050  
At3g02280  
At2g20330  
At2g39580  
At1g69010  
At4g24440  
At3g52860  
At2g36480  
At5g63830  
At4g15410  
At1g31800  
At5g47410  
At3g06960  
At3g11290  
At1g58220  
At1g73960  
At1g06230  
At1g04950  
At3g54230  
At5g53440  
At1g68220  
At5g63200  
At3g62330  
At5g13560  
At4g31270  
At2g32900  
At3g10650  
At1g15280  
At1g14300  
At2g26060  
At1g64350  
At1g60620  
At5g17270  
At1g60650  
At2g41460  
At3g17740  
At5g46210  
At1g60200  
At1g56290  
At5g51130  
At2g16480  
At1g06010  
At2g36350  
At4g18465  
At4g31430  
At2g13840  
At3g15970  
At4g31160  
At3g16830  
At4g24470  
At5g03970  
At1g27900  
At1g79270  
At2g26460  
At1g06070  
At4g04950  
At2g48100  
At1g07620  
At5g06460  
At5g27540  
At5g48120  
At3g59990  
At1g80930  
At2g41500  
At2g40930  
At1g03190  
At1g48560  
At1g01160  
At1g03910  
At1g70180  
At1g70650  
At5g50320  
At2g34900  
At5g45790  
At1g14570  
At2g25760  
At1g55170  
At5g09880  
At1g37150  
At1g65980  
At5g40840



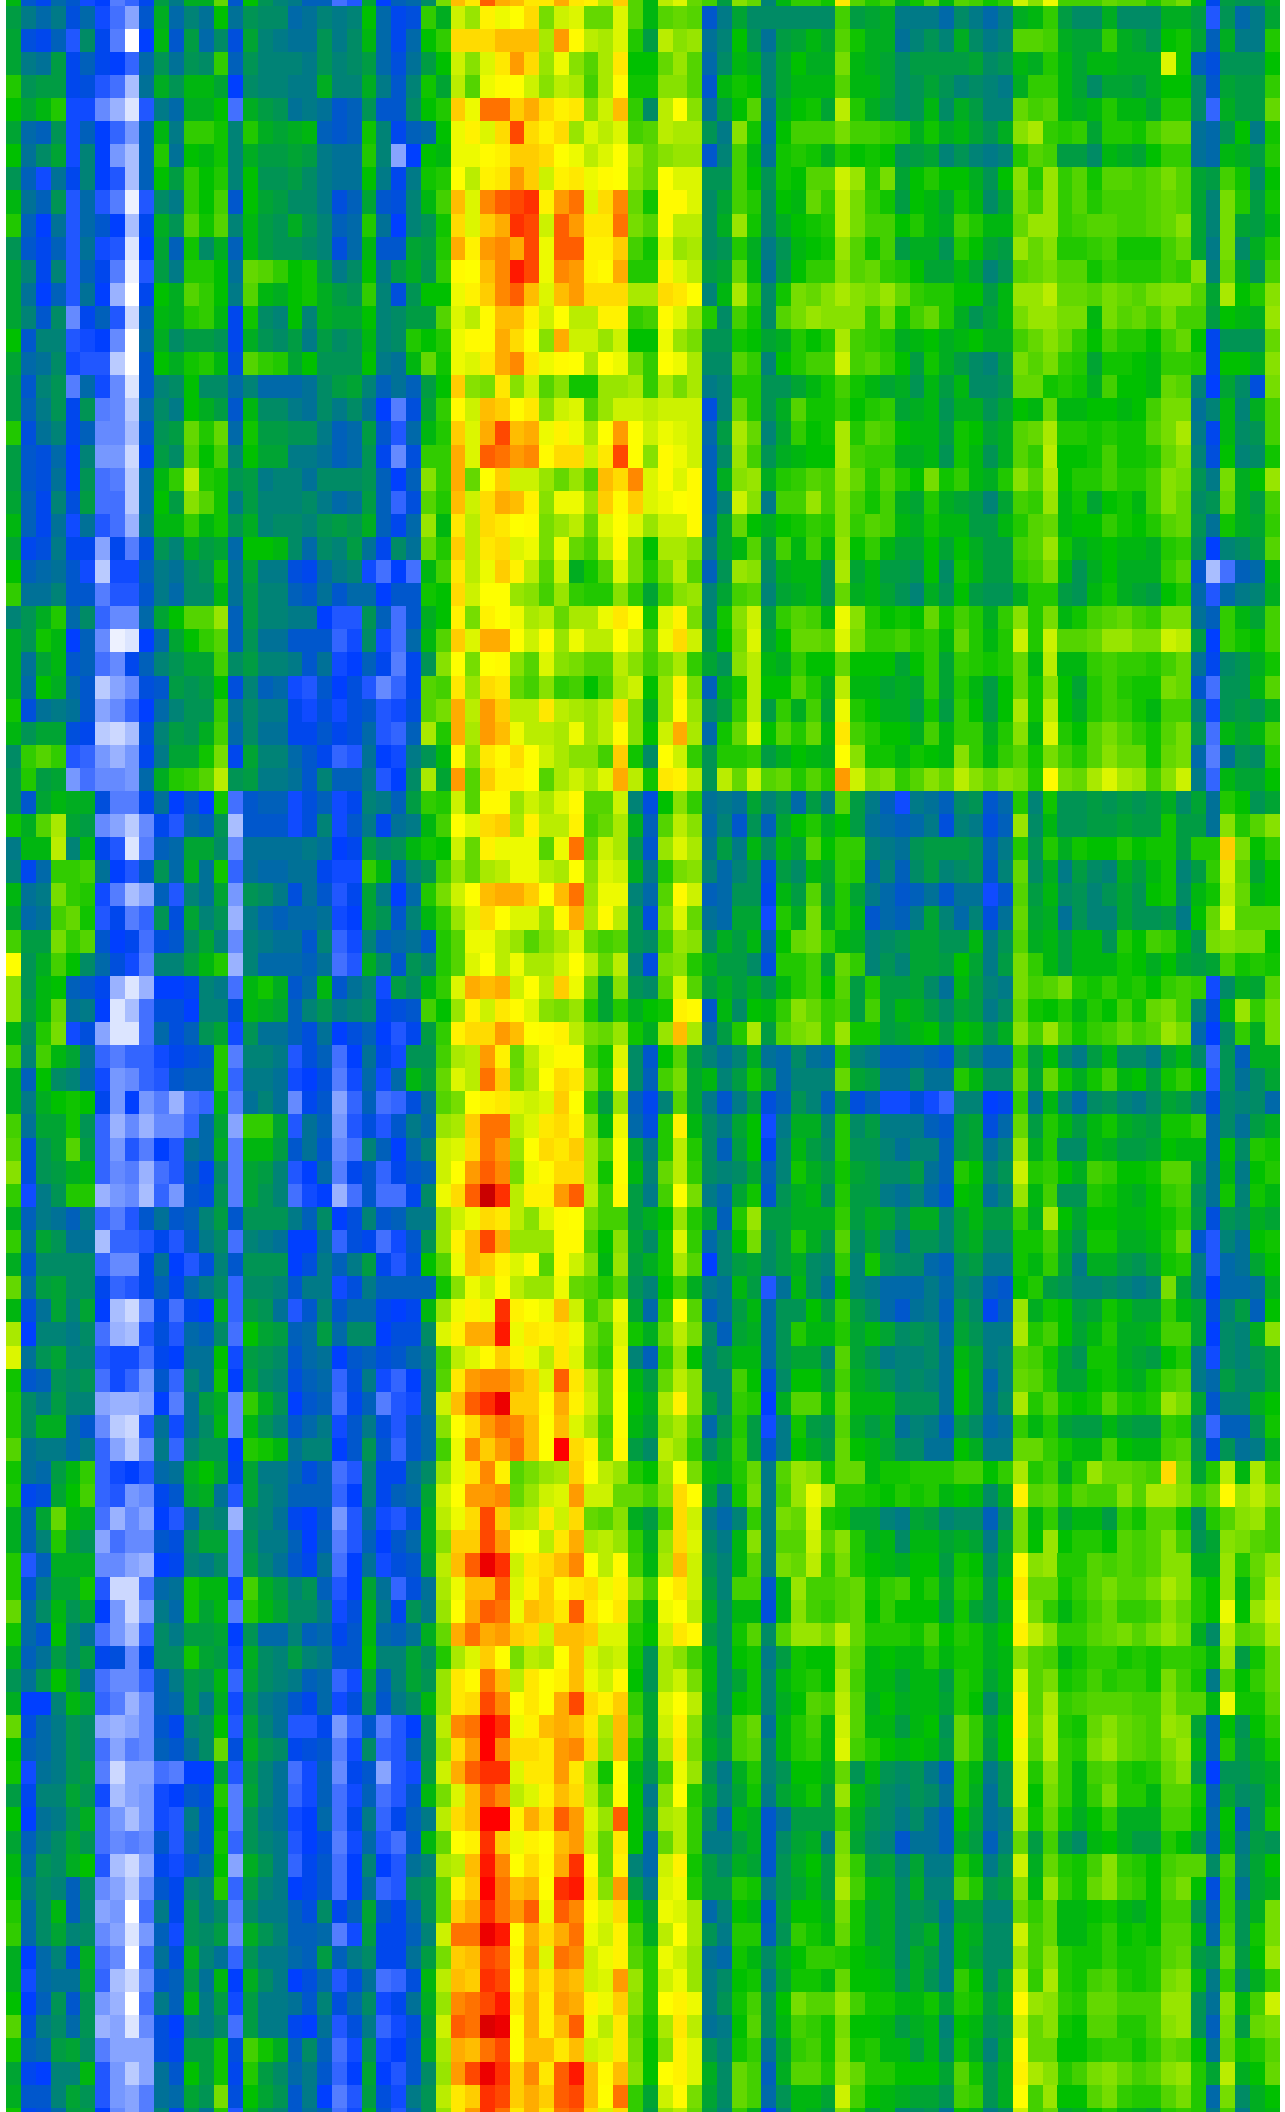

At1g37150  
At1g65980  
At5g40840  
At5g41610  
At4g03430  
At5g62640  
At5g18540  
At5g57950  
At5g09390  
At1g06630  
At5g01160  
At3g24800  
At1g67420  
At5g17210  
At1g08370  
At5g23630  
At4g17020  
At1g29150  
At3g06940  
At1g26660  
At1g09300  
At5g14105  
At5g27660  
At5g58760  
At2g34630  
At5g09590  
At3g43510  
At5g49530  
At5g37580  
At1g71210  
At5g15700  
At1g33390  
At1g10580  
At5g67630  
At3g17880  
At2g21230  
At2g01710  
At3g17880  
At1g45150  
At2g27090  
At3g62220  
At5g22450  
At2g22720  
At5g16210  
At5g53000  
At1g32800  
At2g25760  
At2g25350  
At5g19900  
At3g25840  
At1g04390  
At1g65660  
At1g31600  
At3g47120  
At3g13780  
At1g31280  
At2g21270  
At2g27350  
At4g17410  
At2g26000  
At1g07510  
At1g06210  
At3g14070  
At2g46610  
At4g02020  
At2g02570  
At4g02720  
At2g44950  
At1g23230  
At4g10930  
At2g46030  
At4g16280  
At2g39350  
At3g57570  
At3g03340  
At3g19670  
At5g11350  
At2g39260  
At1g17680  
At3g48120  
At4g35580  
At3g14180  
At2g34730  
At5g37370  
At3g04560  
At4g27120  
At5g58410  
At4g21710  
At2g13370  
At3g06400  
At3g01320

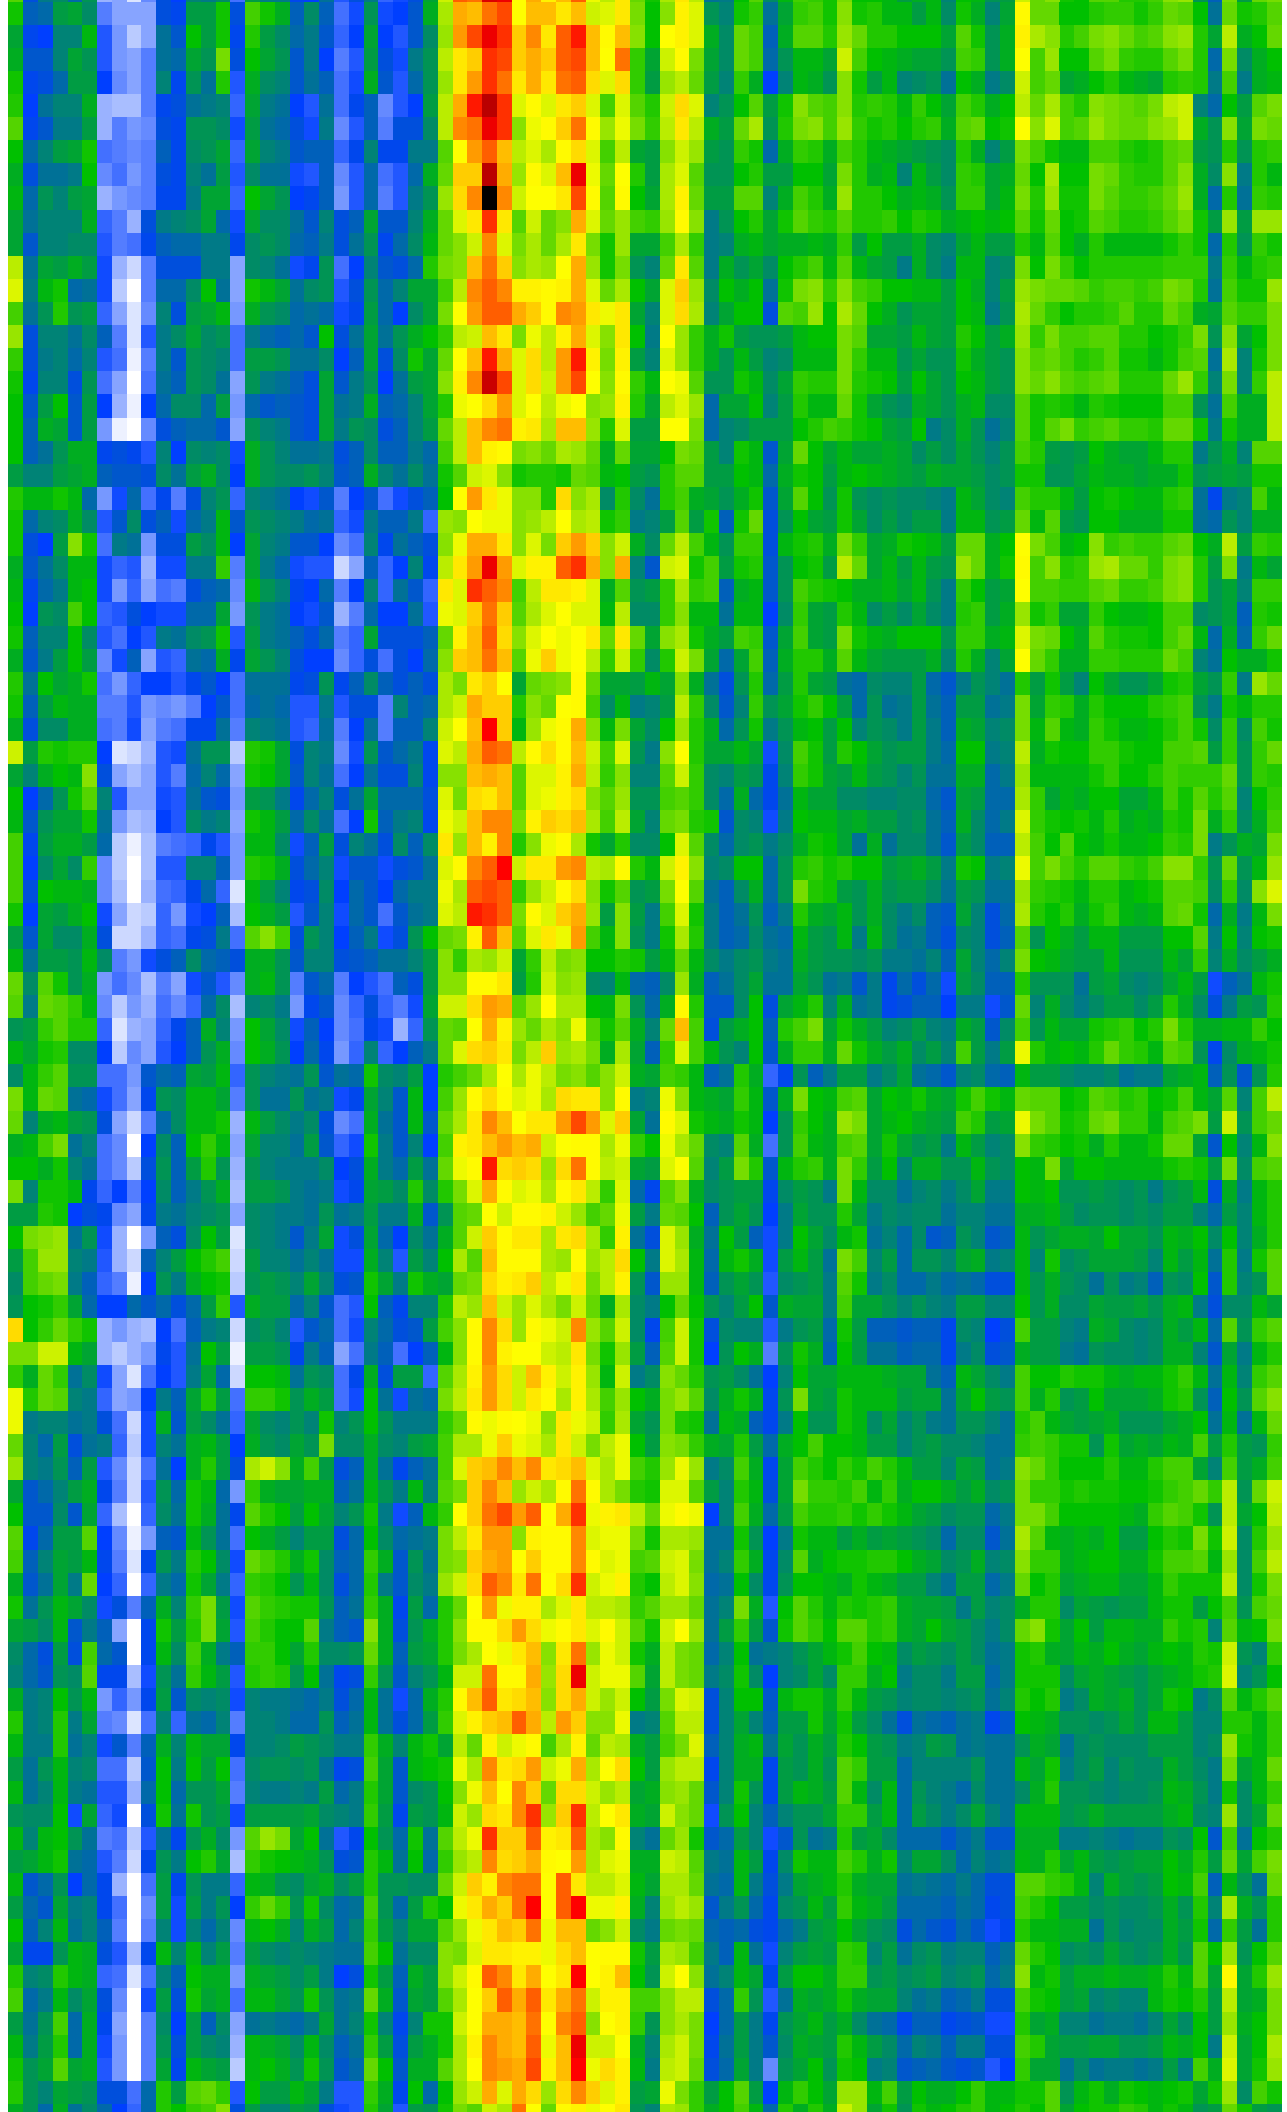

At2g13370  
At3g06400  
At3g01320  
At1g55255  
At5g53800  
At5g17440  
At2g07723  
At5g42820  
At4g19600  
At5g58790  
At5g08220  
At5g19450  
At3g62240  
At2g26920  
At1g60680  
At3g04740  
At1g61040  
At3g06540  
At5g26600  
At2g07698  
At2g07675  
At2g30470  
At4g09680  
At4g37460  
At4g16420  
At5g25560  
At2g25010  
At1g10320  
At1g20920  
At5g26980  
At1g33520  
At4g02430  
At4g24740  
At3g06240  
At3g06210  
At1g26580  
At2g01460  
At2g30530  
At1g08620  
At1g26830  
At1g79830  
At5g63820  
At3g01540  
At4g37120  
At3g50360  
At2g47410  
At1g16010  
At1g31930  
At4g24560  
At3g12490  
At5g08190  
At3g63070  
At1g33230  
At3g57120  
At3g03740  
At4g24200  
At2g42330  
At3g04240  
At2g44200  
At1g55590  
At5g55100  
At3g09910  
At3g54000  
At4g35940  
At2g35330  
At5g11390  
At1g73130  
At1g03750  
At3g54380  
At4g35540  
At1g77220  
At3g13200  
At5g01350  
At5g27460  
At3g03310  
At1g35660  
At5g50780  
At3g51940  
At3g19910  
At1g05380  
At1g05120  
At5g08560  
At4g02480  
At4g29380  
At2g18240  
At3g45830  
At5g02880  
At2g43210  
At1g61690  
At5g16680  
At2g45320  
At1g24995

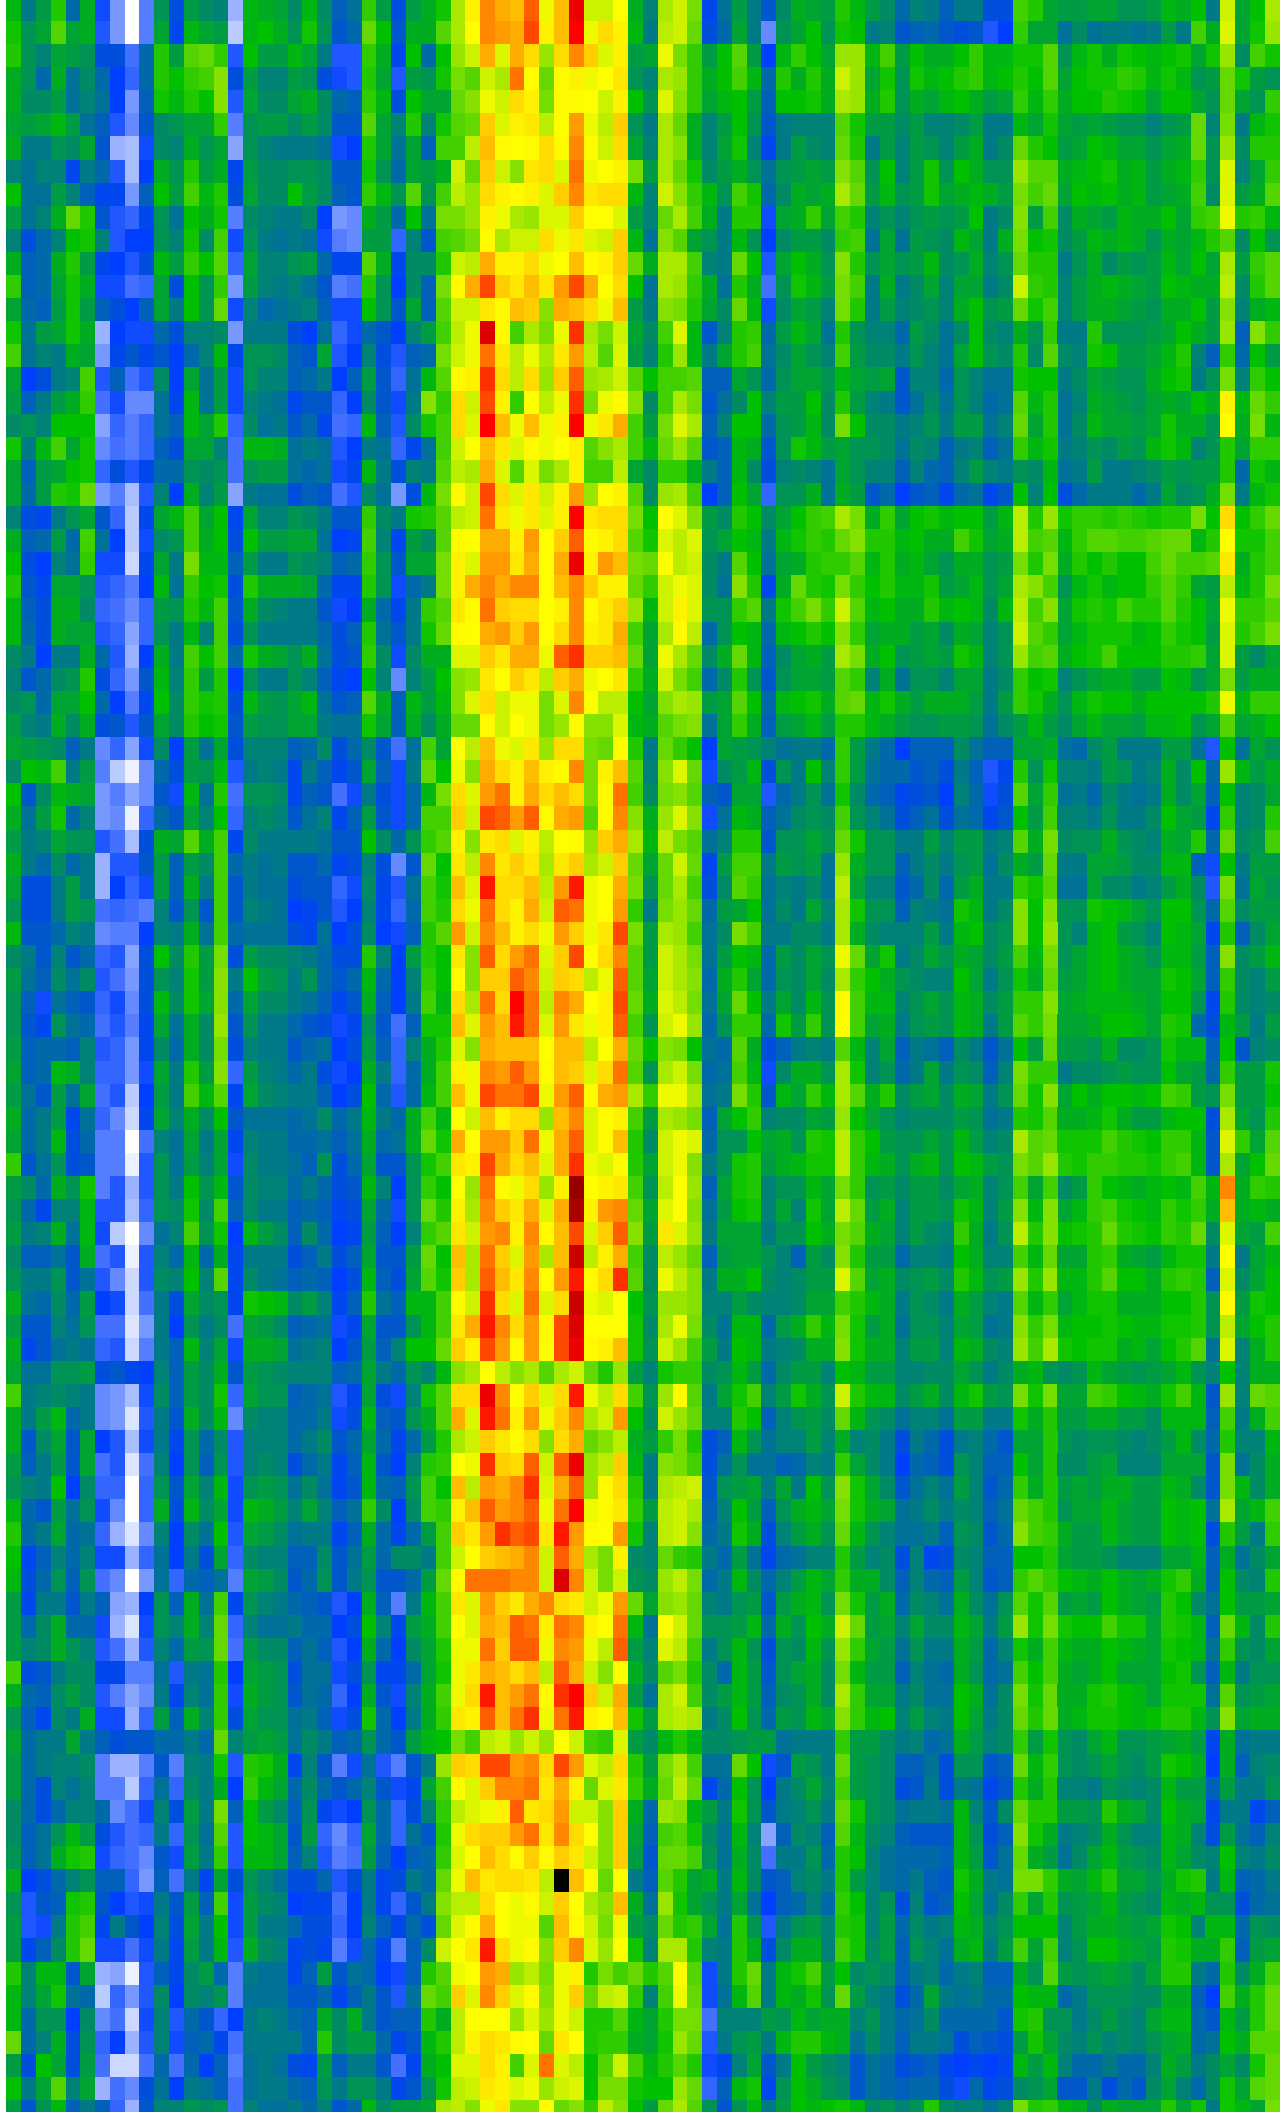

At1g61690  
At5g16680  
At2g45320  
At1g61065  
At1g73150  
At1g27430  
At1g67300  
At4g25500  
At1g11060  
At1g43770  
At2g34200  
At3g28030  
At1g32810  
At1g52520  
At1g11520  
At2g26470  
At3g47610  
At2g02160  
At2g25740  
At4g18260  
At1g08710  
At4g29660  
At5g19660  
At2g43370  
At5g10710  
At1g32750  
At5g24740  
At5g61140  
At1g04230  
At4g34540  
At2g07725  
At2g07687  
At4g24110  
At5g08500  
At2g45690  
At5g47080  
At5g19490  
At5g11310  
At3g54540  
At1g33060  
At1g16650  
At4g38440  
At1g07980  
At1g71350  
At5g51280  
At5g27750  
At5g49930  
At3g15351  
At3g18310  
At5g64270  
At5g42950  
At1g03760  
At5g14530  
At3g05290  
At2g37410  
At3g11540  
At3g10030  
At1g77180  
At1g75660  
At2g07711  
At5g58040  
At1g55310  
At5g23590  
At3g25910  
At1g61620  
At5g13010  
At3g51620  
At1g27150  
At1g68140  
At3g56720  
At5g51340  
At3g50080  
At2g42030  
At5g10940  
At3g01770  
At5g41240  
At3g24200  
At5g16850  
At4g33700  
At3g09850  
At4g22740  
At2g32710  
At2g29590  
At4g10330  
At5g46030  
At5g23710  
At3g22980  
At1g77120  
At1g36060  
At4g39260  
At3g19470  
At2g19170

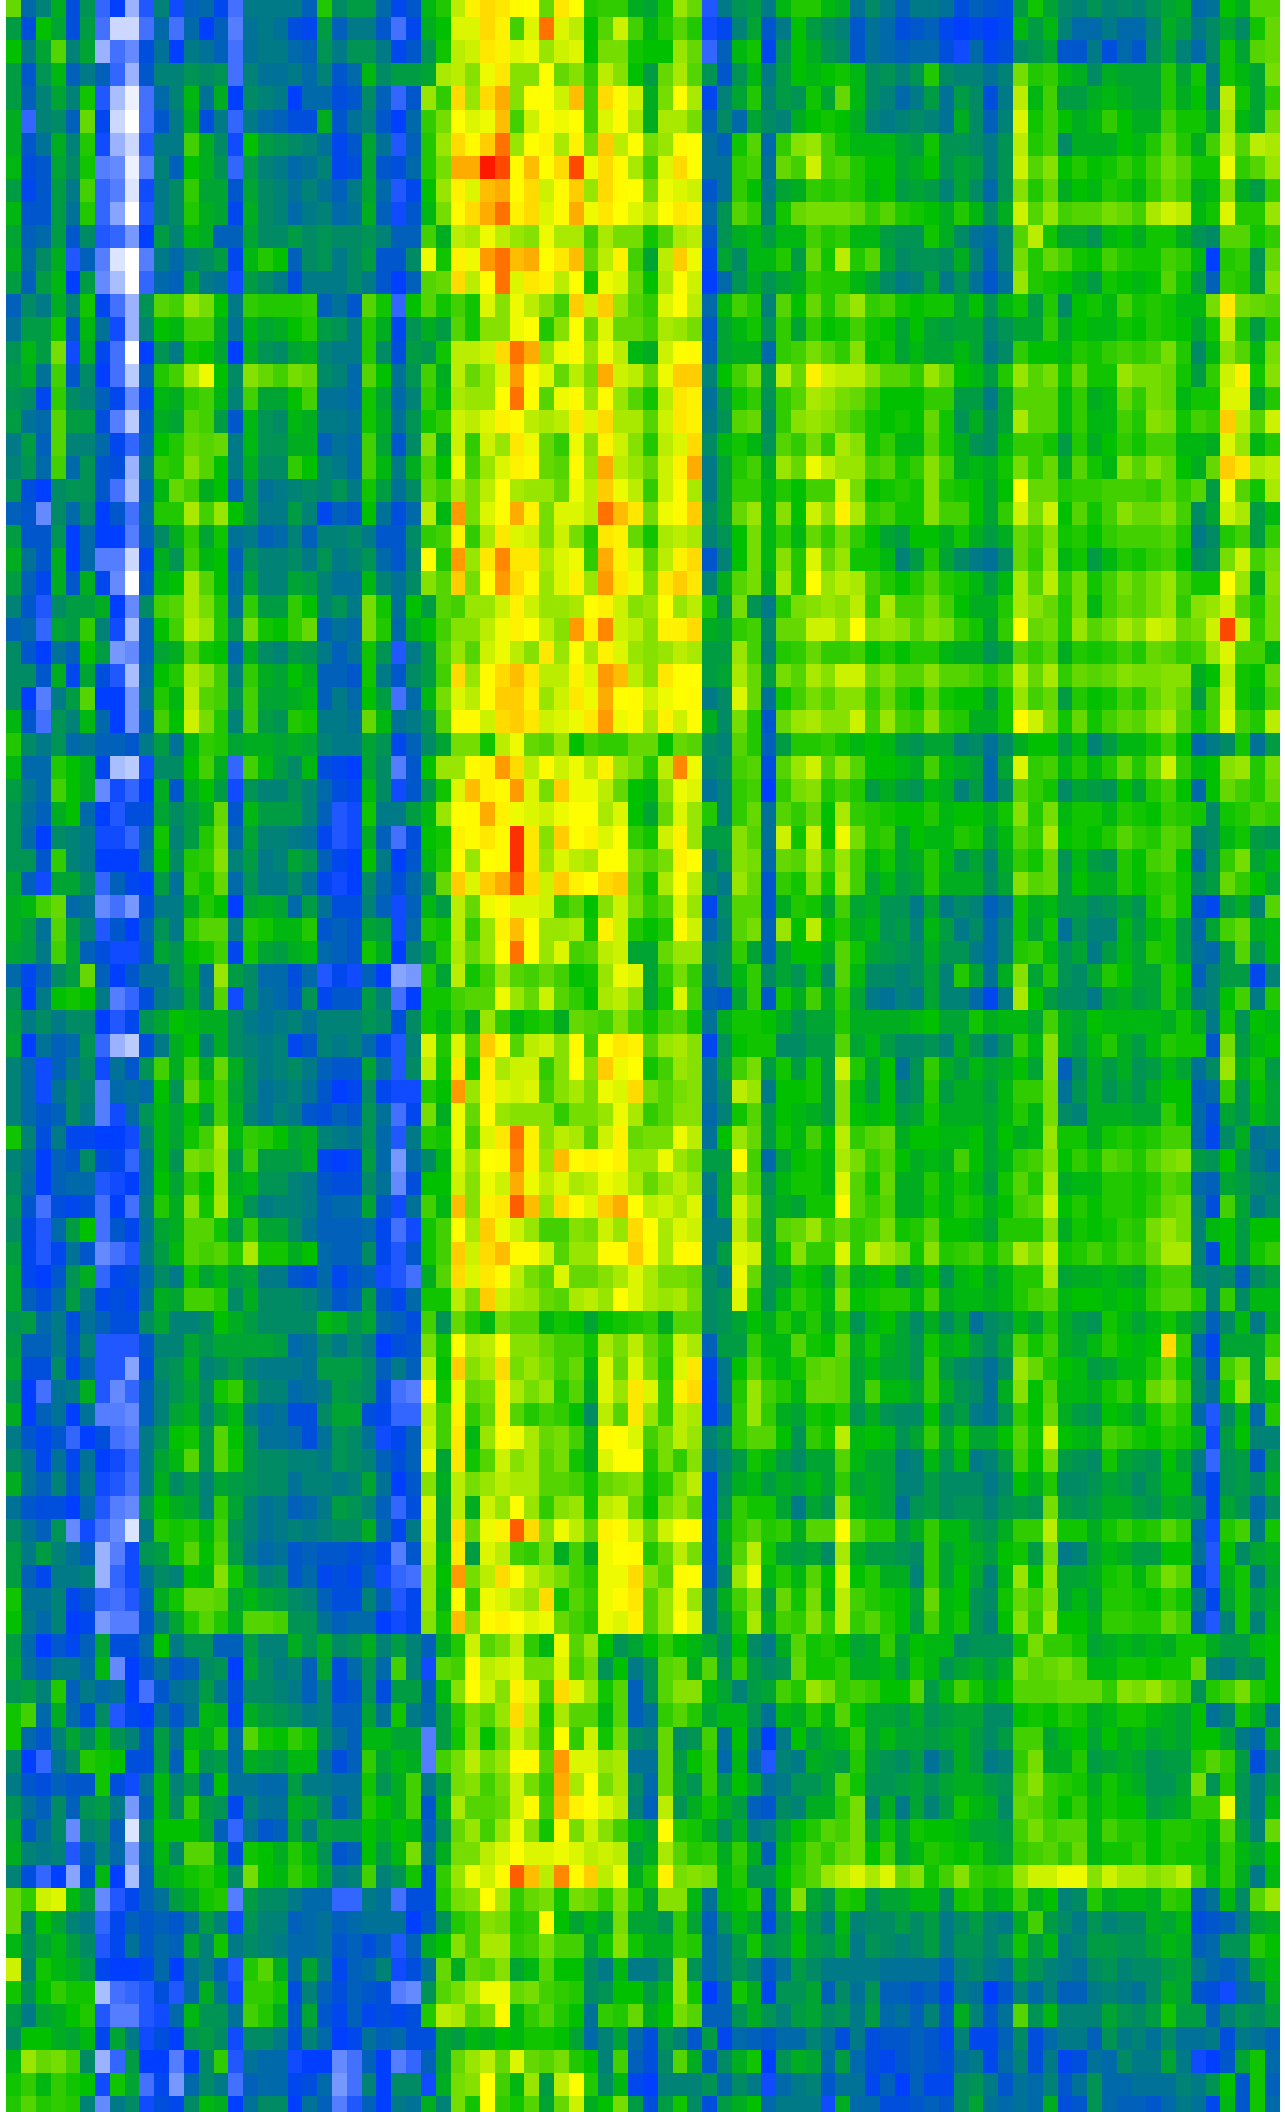

At1g36060  
At4g39260  
At3g19470  
At2g19470  
At1g09100  
At5g40300  
At4g38270  
At3g60610  
At5g09920  
At3g12070  
At5g47060  
At4g02570  
At5g58290  
At1g65040  
At4g14600  
At2g03690  
At1g20100  
At2g28130  
At3g46220  
At4g29770  
At2g46200  
At2g26780  
At5g19350  
At1g65020  
At2g16570  
At5g51700  
At1g80900  
At3g62800  
At2g25950  
At5g64150  
At5g60160  
At3g62140  
At5g42120  
At1g79610  
At3g46920  
At3g29390  
At2g38880  
At5g44150  
At5g13970  
At2g30640  
At1g15300  
At3g09560  
At3g59810  
At5g15400  
At5g40410  
At5g09450  
At3g17890  
At5g14440  
At1g03090  
At3g09480  
At1g19730  
At5g50315  
At1g50380  
At2g04630  
At3g19740  
At2g34160  
At5g37130  
At1g50750  
At5g49110  
At1g04810  
At5g14590  
At3g11270  
At3g04800  
At5g44140  
At5g58710  
At4g01320  
At2g31060  
At1g71840  
At3g59820  
At4g36580  
At1g63300  
At1g64330  
At2g01930  
At5g65470  
At1g04000  
At3g60340  
At3g10810  
At4g40040  
At1g04260  
At3g63220  
At4g38570  
At3g53270  
At4g23920  
At3g09040  
At1g07590  
At3g59280  
At2g39970  
At3g57520  
At2g22910  
At4g36730  
At1g68580

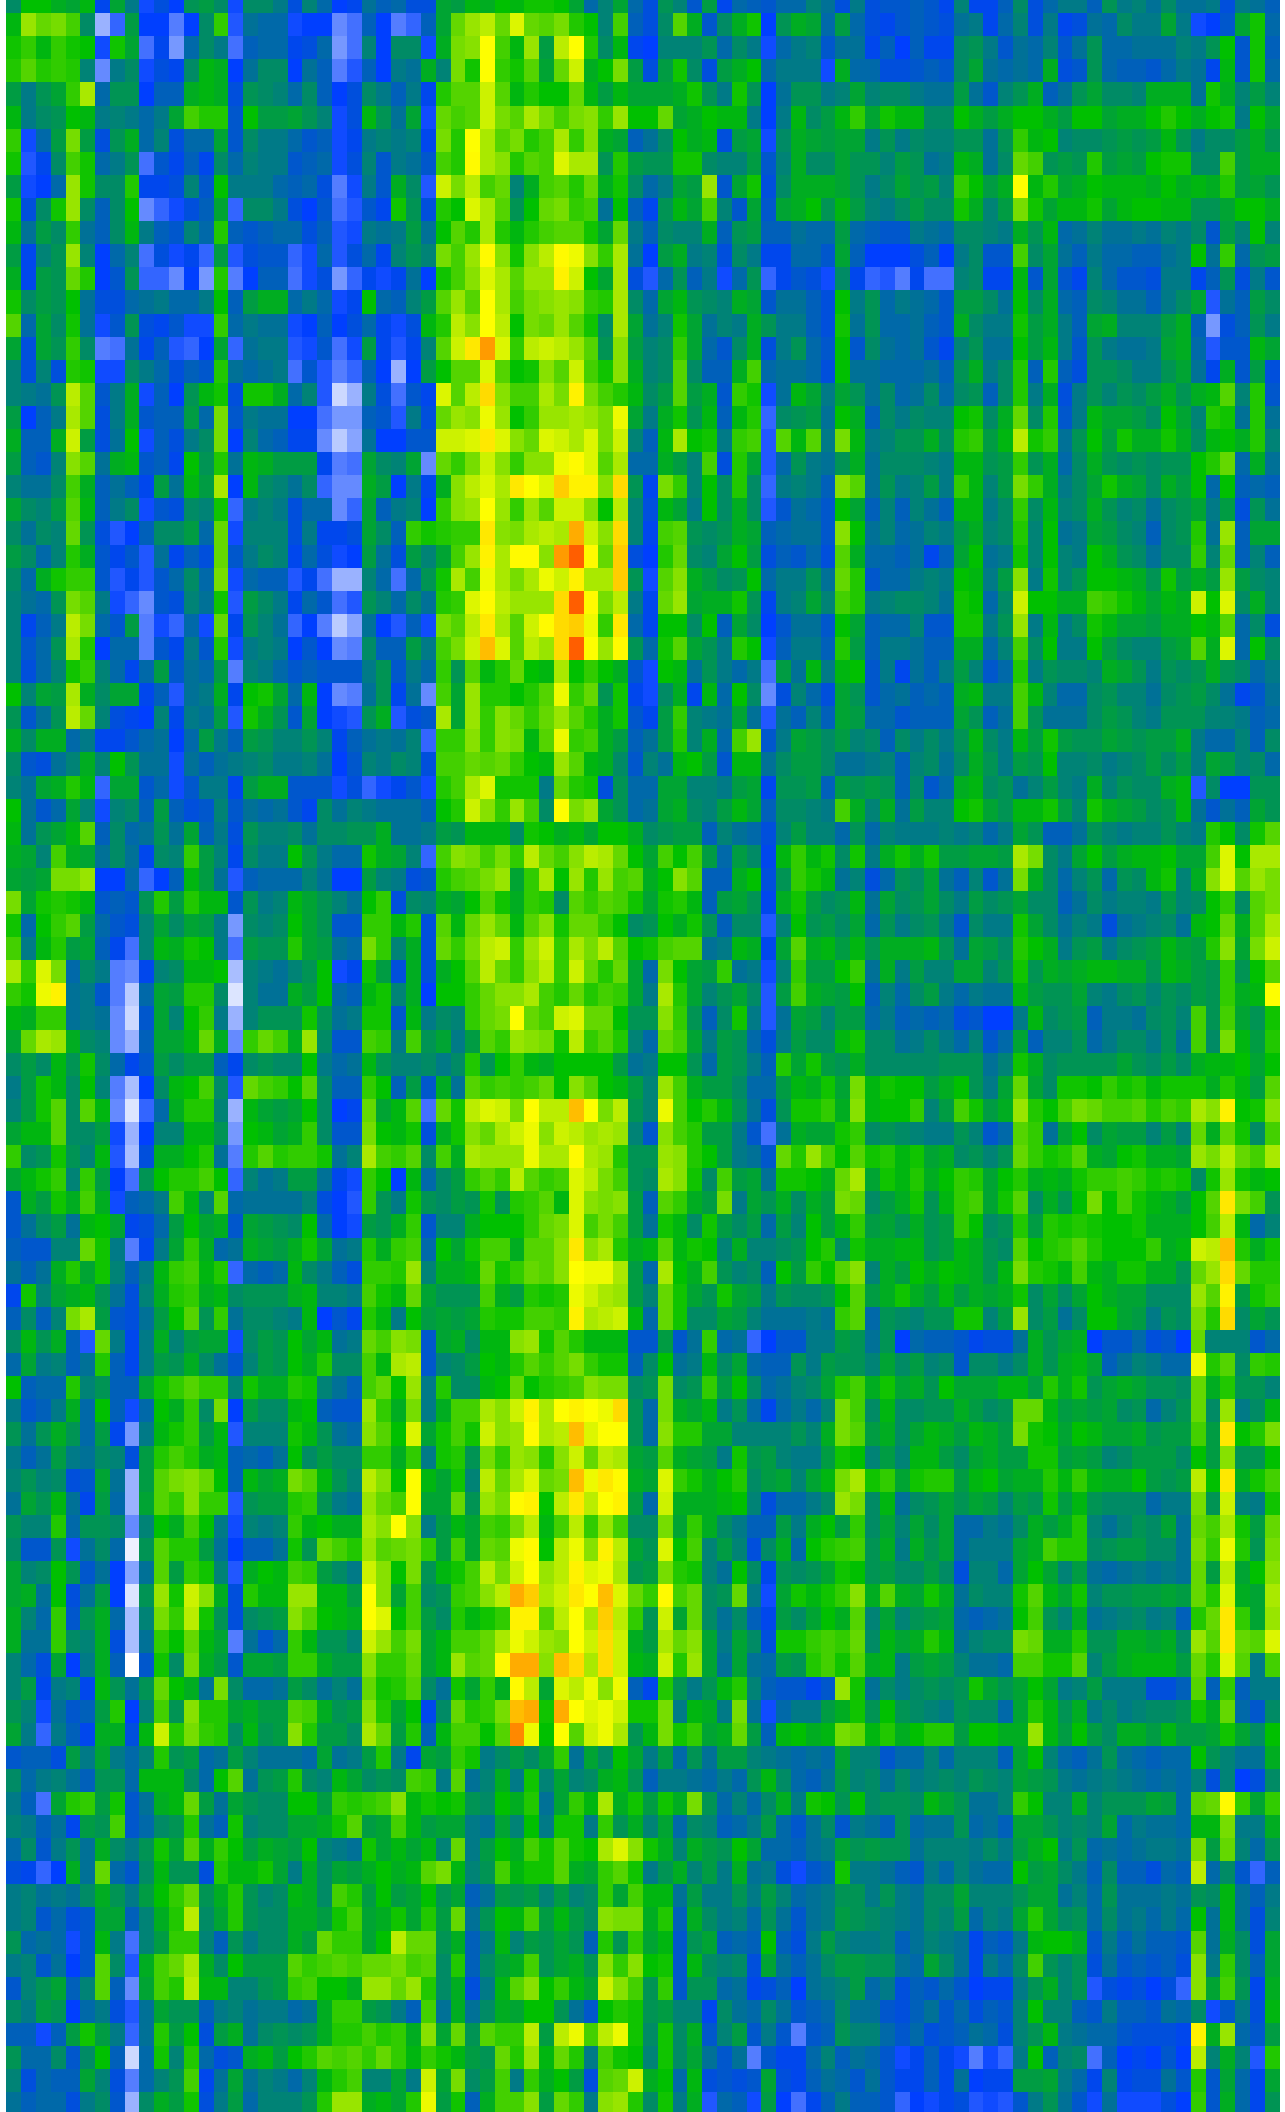

At3g57320  
At2g22910  
At4g36730  
At1g68580  
At2g07671  
At2g35360  
At5g48340  
At4g13730  
At5g35840  
At5g20840  
At3g04750  
At1g70570  
At4g16830  
At4g34140  
At1g55250  
At1g21570  
At1g09680  
At3g28970  
At5g61930  
At1g51720  
At1g10610  
At1g55110  
At1g18030  
At4g39450  
At4g35240  
At2g44530  
At3g13810  
At1g11930  
At5g43920  
At3g44100  
At5g59430  
At4g32250  
At4g20480  
At1g58150  
At1g61780  
At5g42810  
At5g16580  
At5g12350  
At3g58760  
At1g61490  
At3g53090  
At5g53010  
At5g01950  
At5g23520  
At4g12250  
At2g33490  
At1g61810  
At1g25500  
At5g37930  
At5g01970  
At2g37840  
At1g54150  
At4g16770  
At1g59830  
At5g66280  
At5g15710  
At4g39410  
At1g29240  
At5g66080  
At4g00230  
At3g20620  
At4g00450  
At1g24190  
At2g19560  
At5g63200  
At2g22090  
At3g56250  
At1g68070  
At5g23150  
At2g47350  
At1g68920  
At5g19420  
At5g42560  
At1g22610  
At5g15330  
At5g14420  
At3g04990  
At3g27980  
At5g15860  
At5g03310  
At4g25420  
At4g16360  
At1g65340  
At4g36880  
At5g02260  
At3g51410  
At1g59520  
At3g03640  
At1g08180  
At1g29195  
At3g45310  
At3g01360

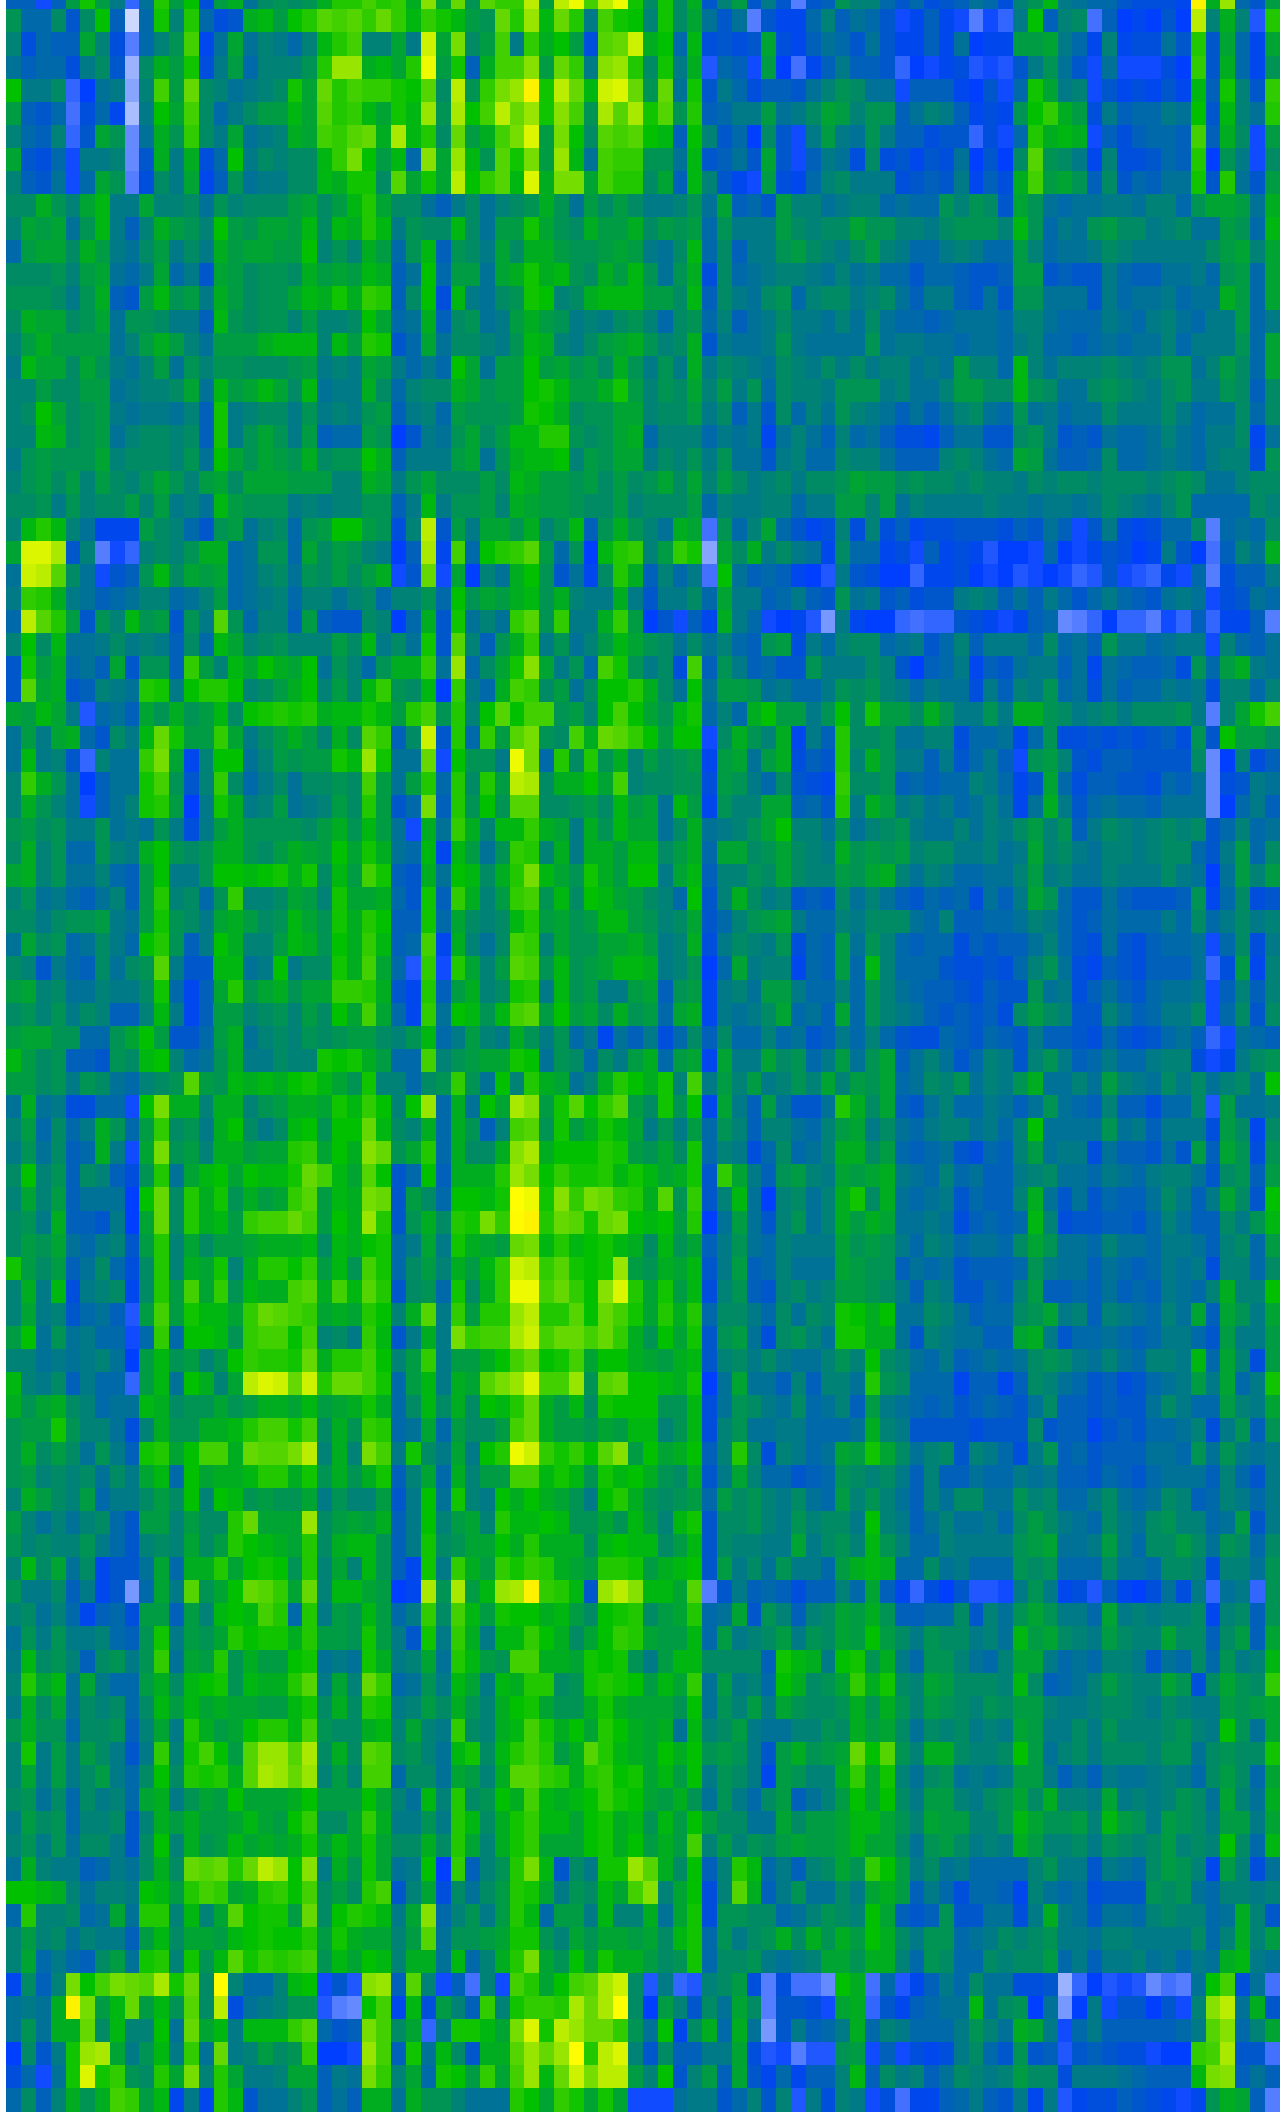

At1g29195  
At3g45310  
At3g01360  
At2g42430  
At1g76500  
At3g62860  
At2g36080  
At1g09570  
At2g11120  
At1g36000  
At3g43820  
At1g41750  
At1g36030  
At5g28410  
At2g21690  
At3g32250  
At3g53290  
At5g33240  
At1g52390  
At2g45230  
At2g06180  
At3g60170  
At4g08140  
At3g51790  
At1g61800  
At1g42710  
At3g60290  
At2g04830  
At5g49590  
At1g26860  
At1g77300  
At4g18330  
At2g18540  
At4g09840  
At1g32290  
At1g54880  
At5g34770  
At3g04250  
At1g17390  
At2g01800  
At1g62160  
At2g13900  
At3g50320  
At3g17140  
At1g14430  
At1g64010  
At1g47300  
At4g02320  
At1g32680  
At5g38670  
At4g31740  
At1g34140  
At2g05270  
At1g42690  
At1g29770  
At1g64820  
At5g09360  
At1g41900  
At2g37290  
At5g48780  
At4g33625  
At2g02670  
At1g69540  
At3g56390  
At4g07350  
At3g43080  
At2g19230  
At2g10050  
At5g11520  
At3g19780  
At1g39270  
At2g24780  
At3g28280  
At5g20800  
At4g30970  
At1g34090  
At3g31940  
At3g42990  
At1g43950  
At2g22160  
At2g42050  
At2g17860  
At3g32220  
At4g04150  
At1g02320  
At3g21360  
At3g20420  
At3g16640  
At4g38090  
At1g54690  
At2g14260

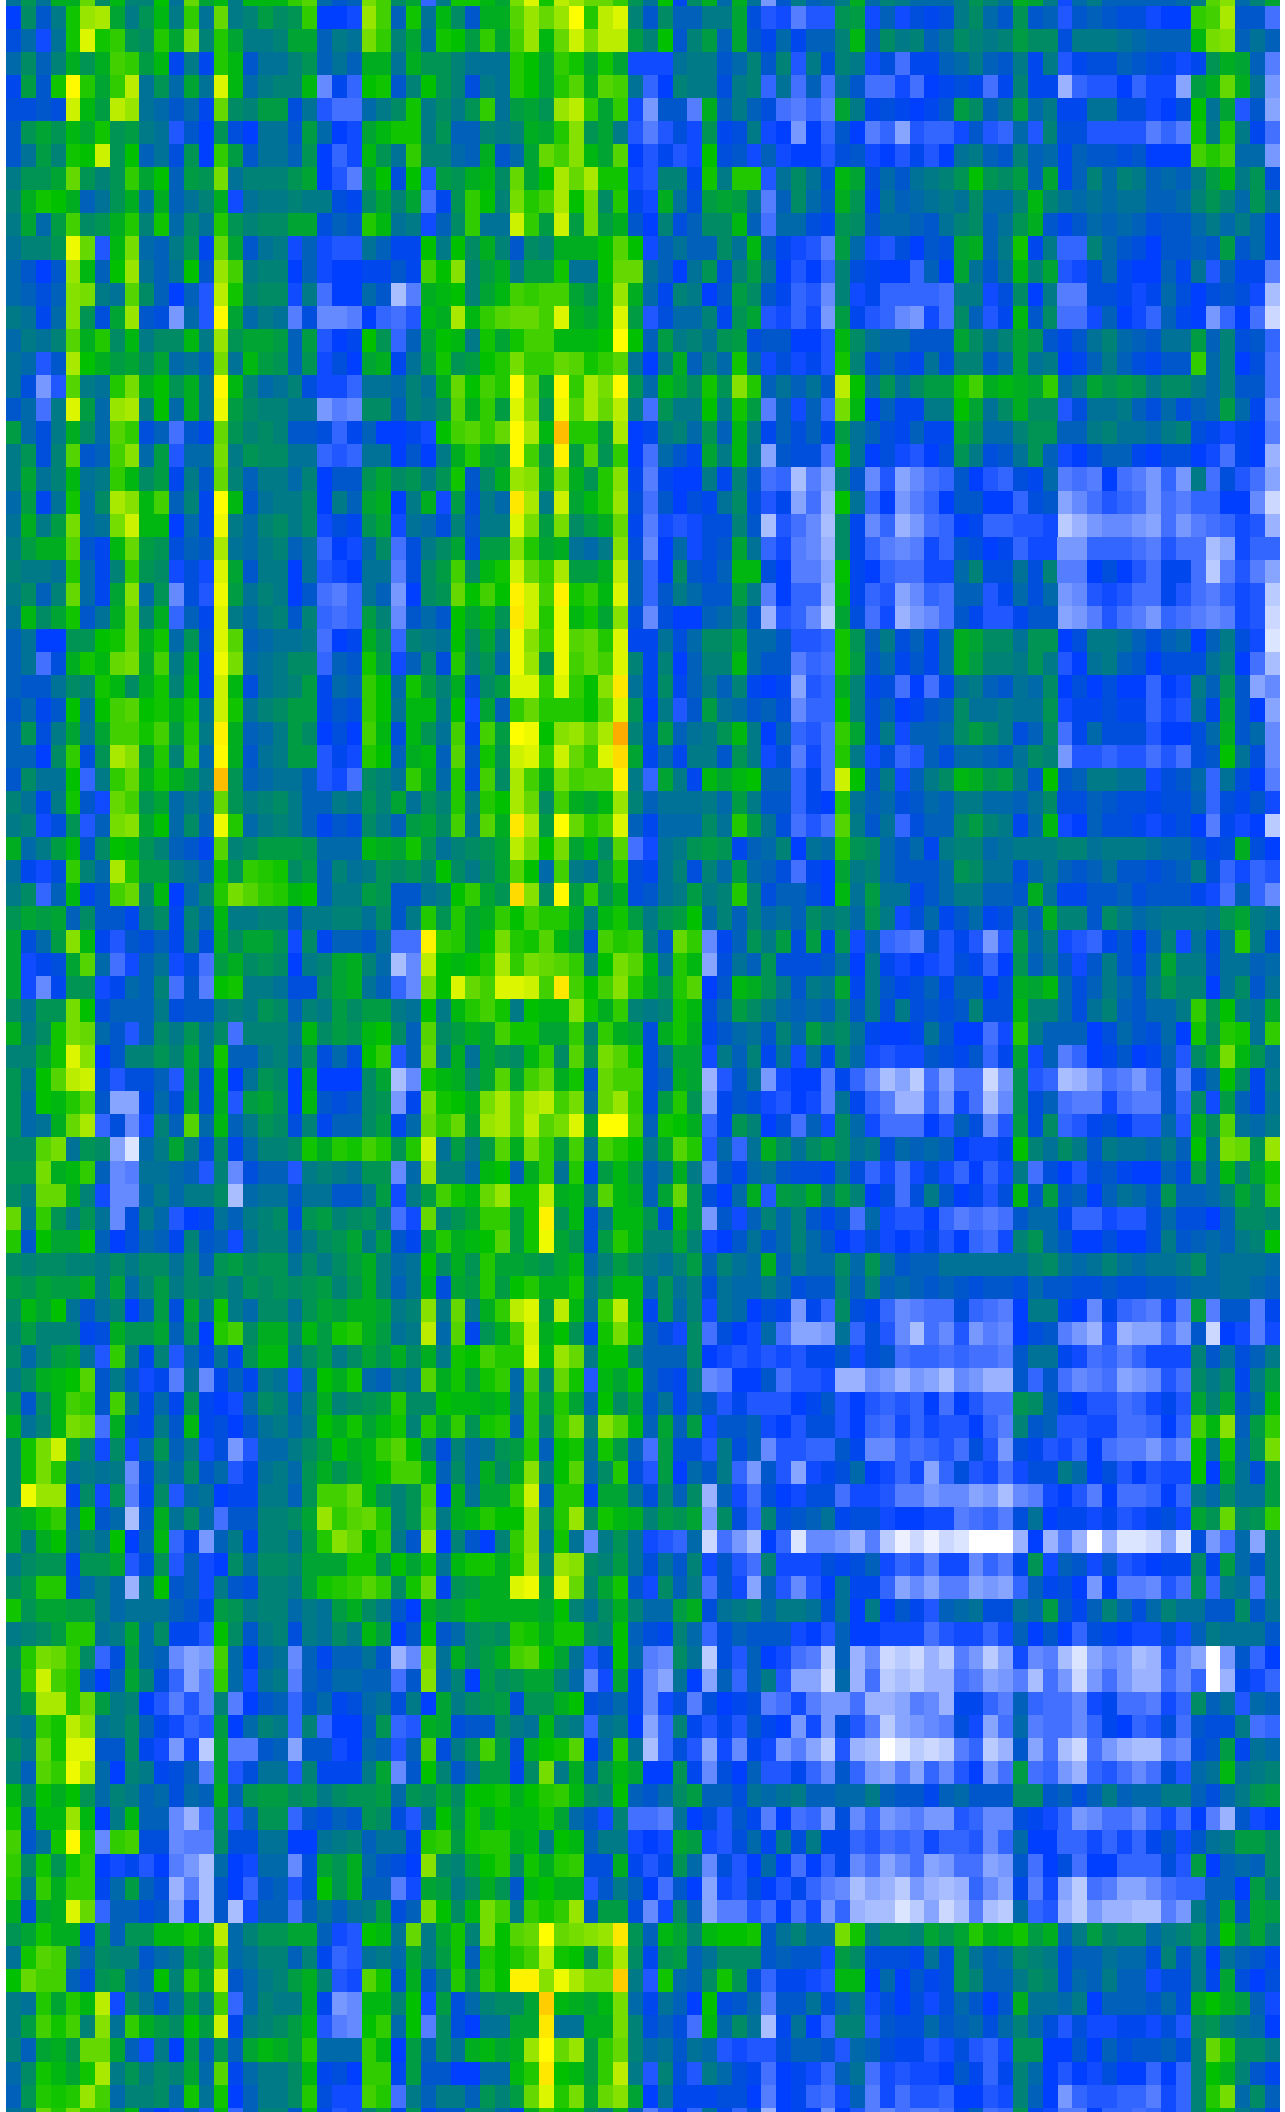

At4g38090  
At1g54690  
At2g14260  
At2g04230  
At1g56180  
At1g59900  
At5g08520  
At3g18270  
At3g62690  
At1g15960  
At2g46450  
At2g24280  
At5g41210  
At5g62820  
At4g18975  
At1g68570  
At5g37680  
At2g16070  
At5g16650  
At4g32770  
At1g73880  
At3g52230  
At1g70580  
At3g46670  
At1g24490  
At3g10350  
At4g26700  
At4g33670  
At1g01160  
At5g54540  
At1g53450  
At5g18100  
At5g13950  
At3g04590  
At1g01520  
At1g15180  
At1g15060  
At3g22530  
At5g17310  
At2g13730  
At1g49670  
At4g13360  
At1g79230  
At4g16020  
At2g47800  
At5g53420  
At4g17830  
At3g05970  
At1g17020  
At5g14950  
At2g24200  
At4g29040  
At1g79440  
At2g40080  
At2g05880  
At3g47240  
At2g39980  
At1g29120  
At4g20070  
At4g17870  
At1g78280  
At1g70000  
At1g15960  
At4g21790  
At5g05440  
At2g44080  
At3g48990  
At3g27770  
At5g25350  
At5g44470  
At5g05250  
At5g13030  
At5g13030  
At1g33990  
At3g12800  
At2g43970  
At4g17570  
At3g21440  
At1g64950  
At3g16910  
At4g23100  
At4g01650  
At2g18960  
At3g13225  
At5g51180  
At3g21650  
At1g62430  
At1g43620  
At5g03470  
At1g12710  
At5g25210

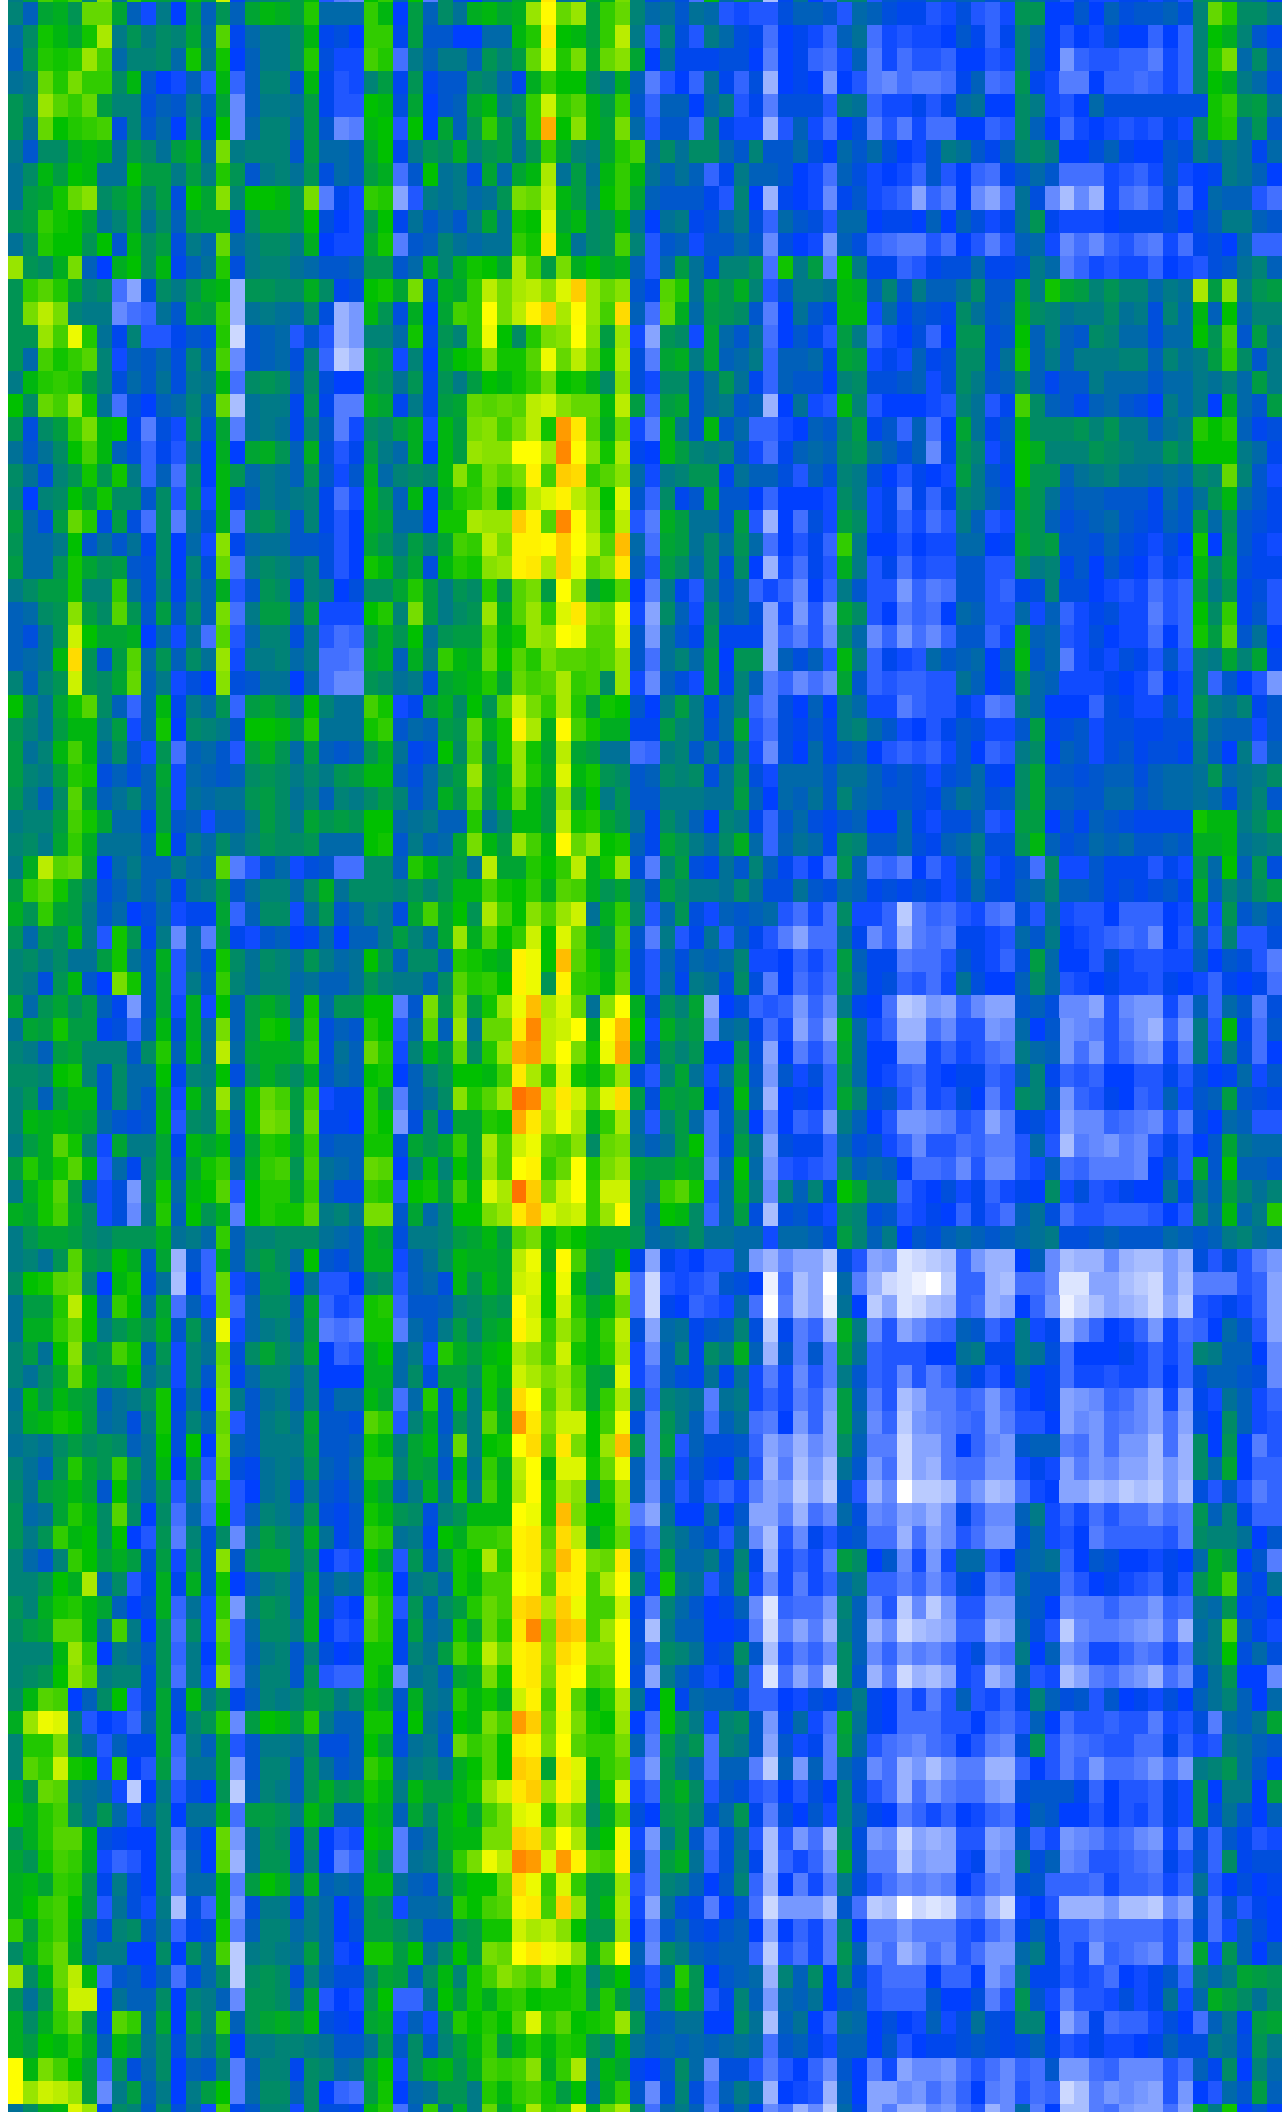

At5g03470  
At1g12710  
At5g25210  
At1g75250  
At4g29190  
At3g01310  
At1g47680  
At1g17665  
At3g09390  
At5g42900  
At4g16146  
At3g51750  
At5g28040  
At3g05220  
At5g62000  
At3g60190  
At3g05640  
At1g17440  
At5g24890  
At5g41340  
At3g19860  
At2g46550  
At1g21410  
At3g62700  
At5g01880  
At5g67190  
At5g57360  
At2g24420  
At2g03140  
At1g02020  
At3g51860  
At1g80160  
At5g48180  
At3g08860  
At5g13170  
At2g37460  
At3g61880  
At1g34200  
At5g04310  
At1g05270  
At1g11650  
At5g44260  
At1g62510  
At2g33150  
At4g22220  
At1g33270  
At5g64230  
At2g13290  
At5g67480  
At3g48070  
At3g14700  
At3g59640  
At3g03440  
At5g26840  
At3g11930  
At4g13010  
At4g17840  
At1g64810  
At5g59400  
At1g22370  
At2g44310  
At4g19390  
At1g07080  
At1g60940  
At3g14660  
At1g08570  
At2g02710  
At2g32090  
At2g43540  
At1g01240  
At2g15695  
At1g30500  
At3g15780  
At4g03510  
At3g16270  
At5g58070  
At5g58650  
At3g62770  
At1g14200  
At5g13800  
At4g36210  
At3g23920  
At4g38810  
At1g78070  
At5g52660  
At2g04350  
At3g12800  
At4g28610  
At3g33073  
At4g15260  
At3g55640  
At2g26970



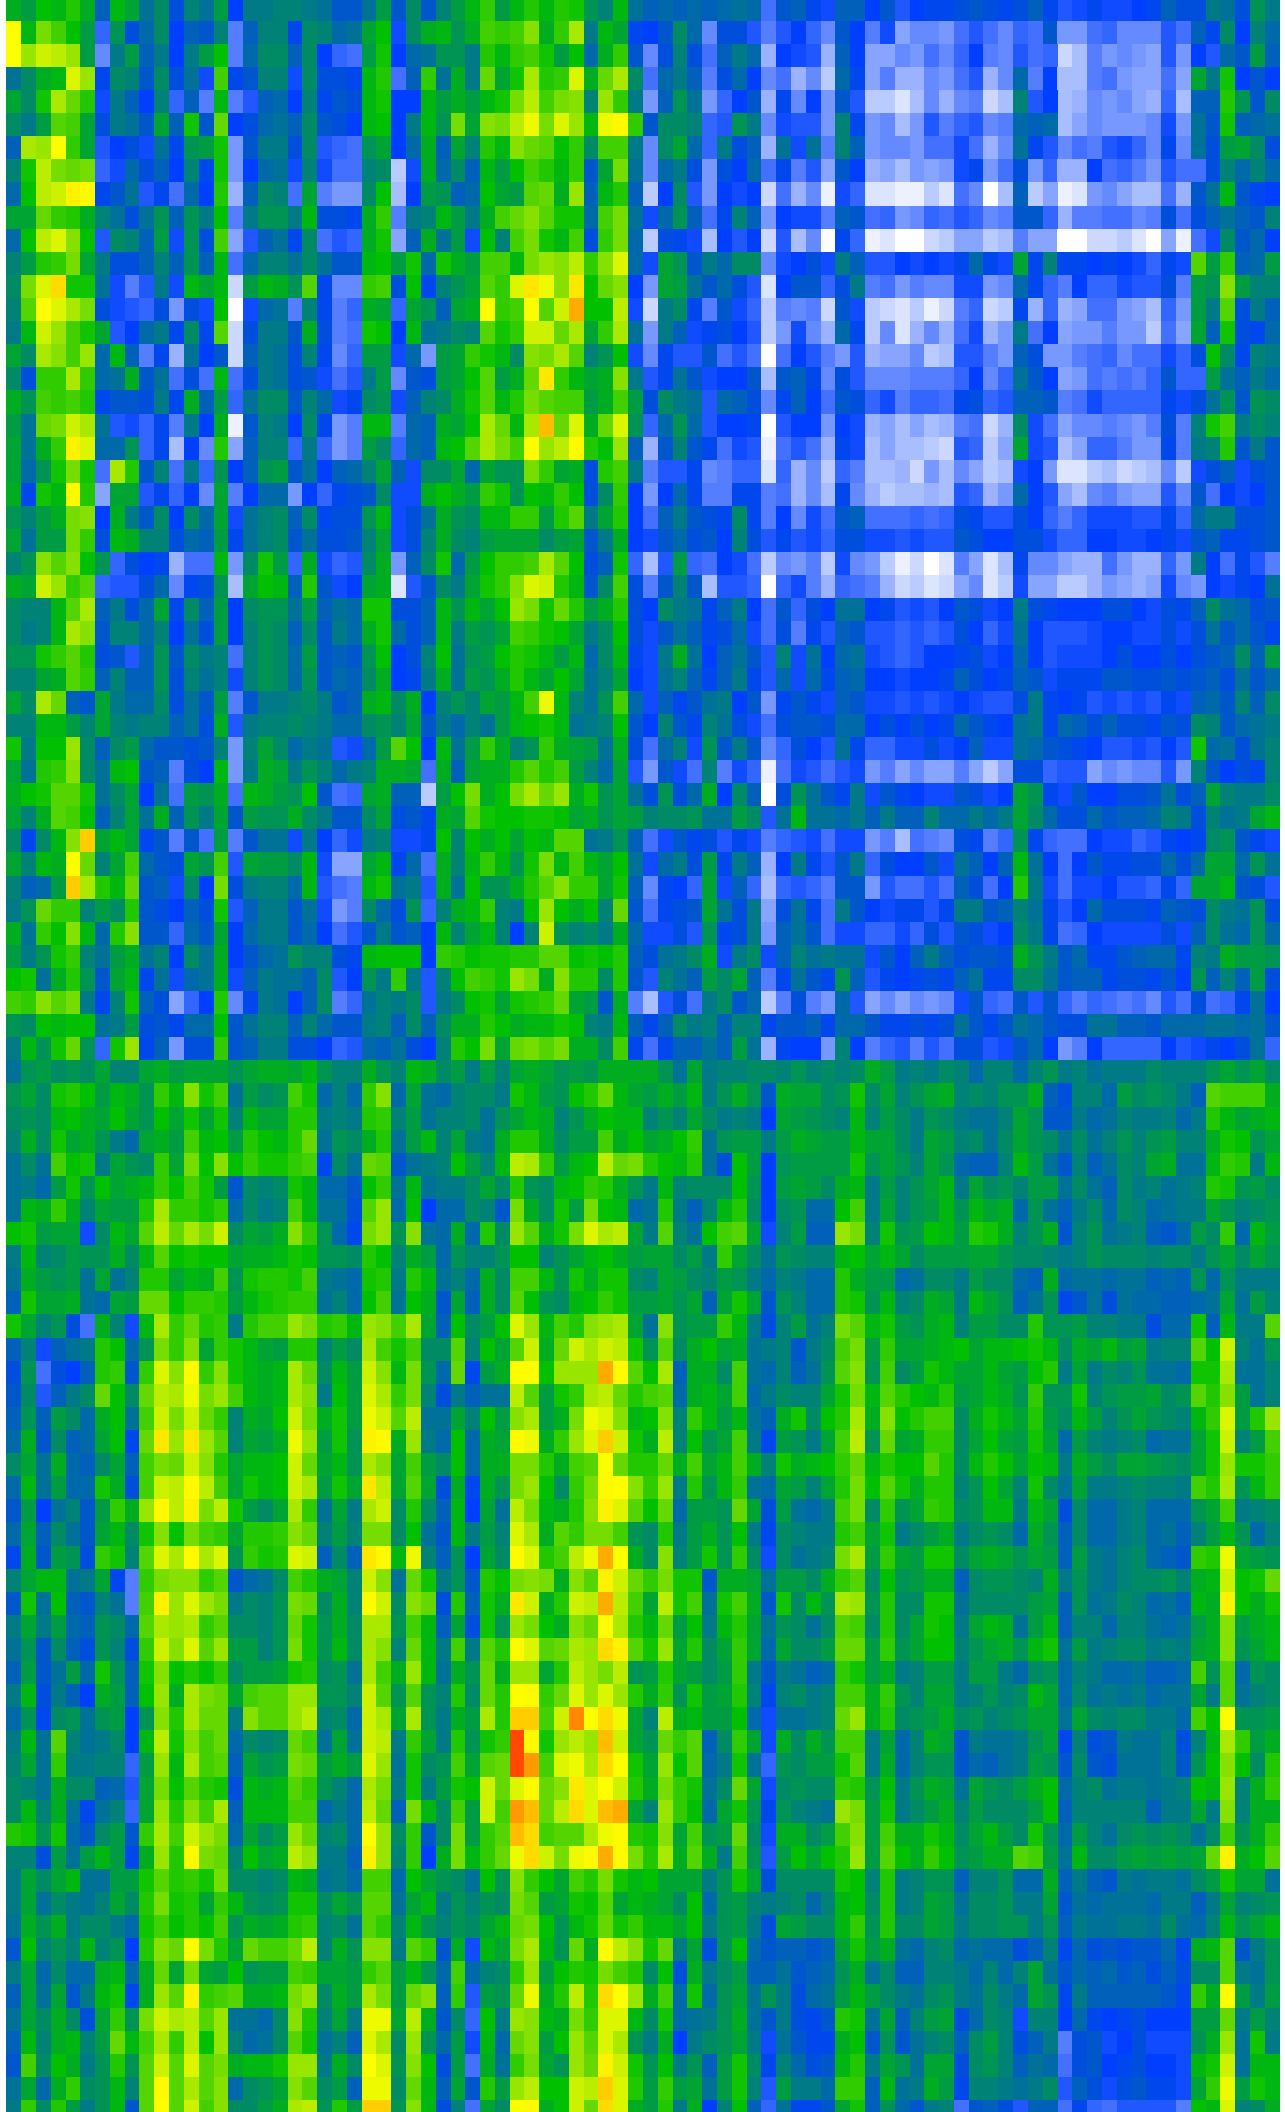

At3g33073  
At4g15260  
At3g55640  
At2g36970  
At4g03020  
At4g10790  
At3g20500  
At3g23570  
At4g22260  
At1g71140  
At3g48000  
At5g59050  
At2g38000  
At3g09030  
At3g18370  
At4g36040  
At2g28720  
At1g22340  
At1g33970  
At3g58970  
At3g14690  
At3g21690  
At3g04000  
At1g05560  
At4g29010  
At1g70810  
At5g39520  
At2g25625  
At2g45570  
At1g09500  
At1g78600  
At1g20070  
At1g05170  
At4g32600  
At4g05320  
At5g24440  
At1g21760  
At2g24520  
At3g46590  
At5g02810  
At2g16365  
At3g26730  
At4g20170  
At5g45430  
At2g07777  
At3g01210  
At5g18990  
At2g07685  
At1g74190  
At2g41570  
At3g52210  
At1g69860  
At5g32426  
At1g55970  
At4g02310  
At5g05050  
At3g21410  
At1g48110  
At2g01940  
At5g65520  
At4g09490  
At3g12940  
At2g47820  
At2g33980  
At5g48090  
At2g33760  
At3g24330  
At1g08060  
At3g04970  
At2g40950  
At4g11440  
At5g65570  
At3g06180  
At1g73060  
At1g74860  
At5g16320  
At2g27480  
At3g23260  
At4g17750  
At3g09370  
At1g21610  
At5g56700  
At3g45270  
At2g11690  
At1g47750  
At1g68250  
At1g12790  
At4g23840  
At4g37480  
At1g14640  
At4g25800  
At3g14710

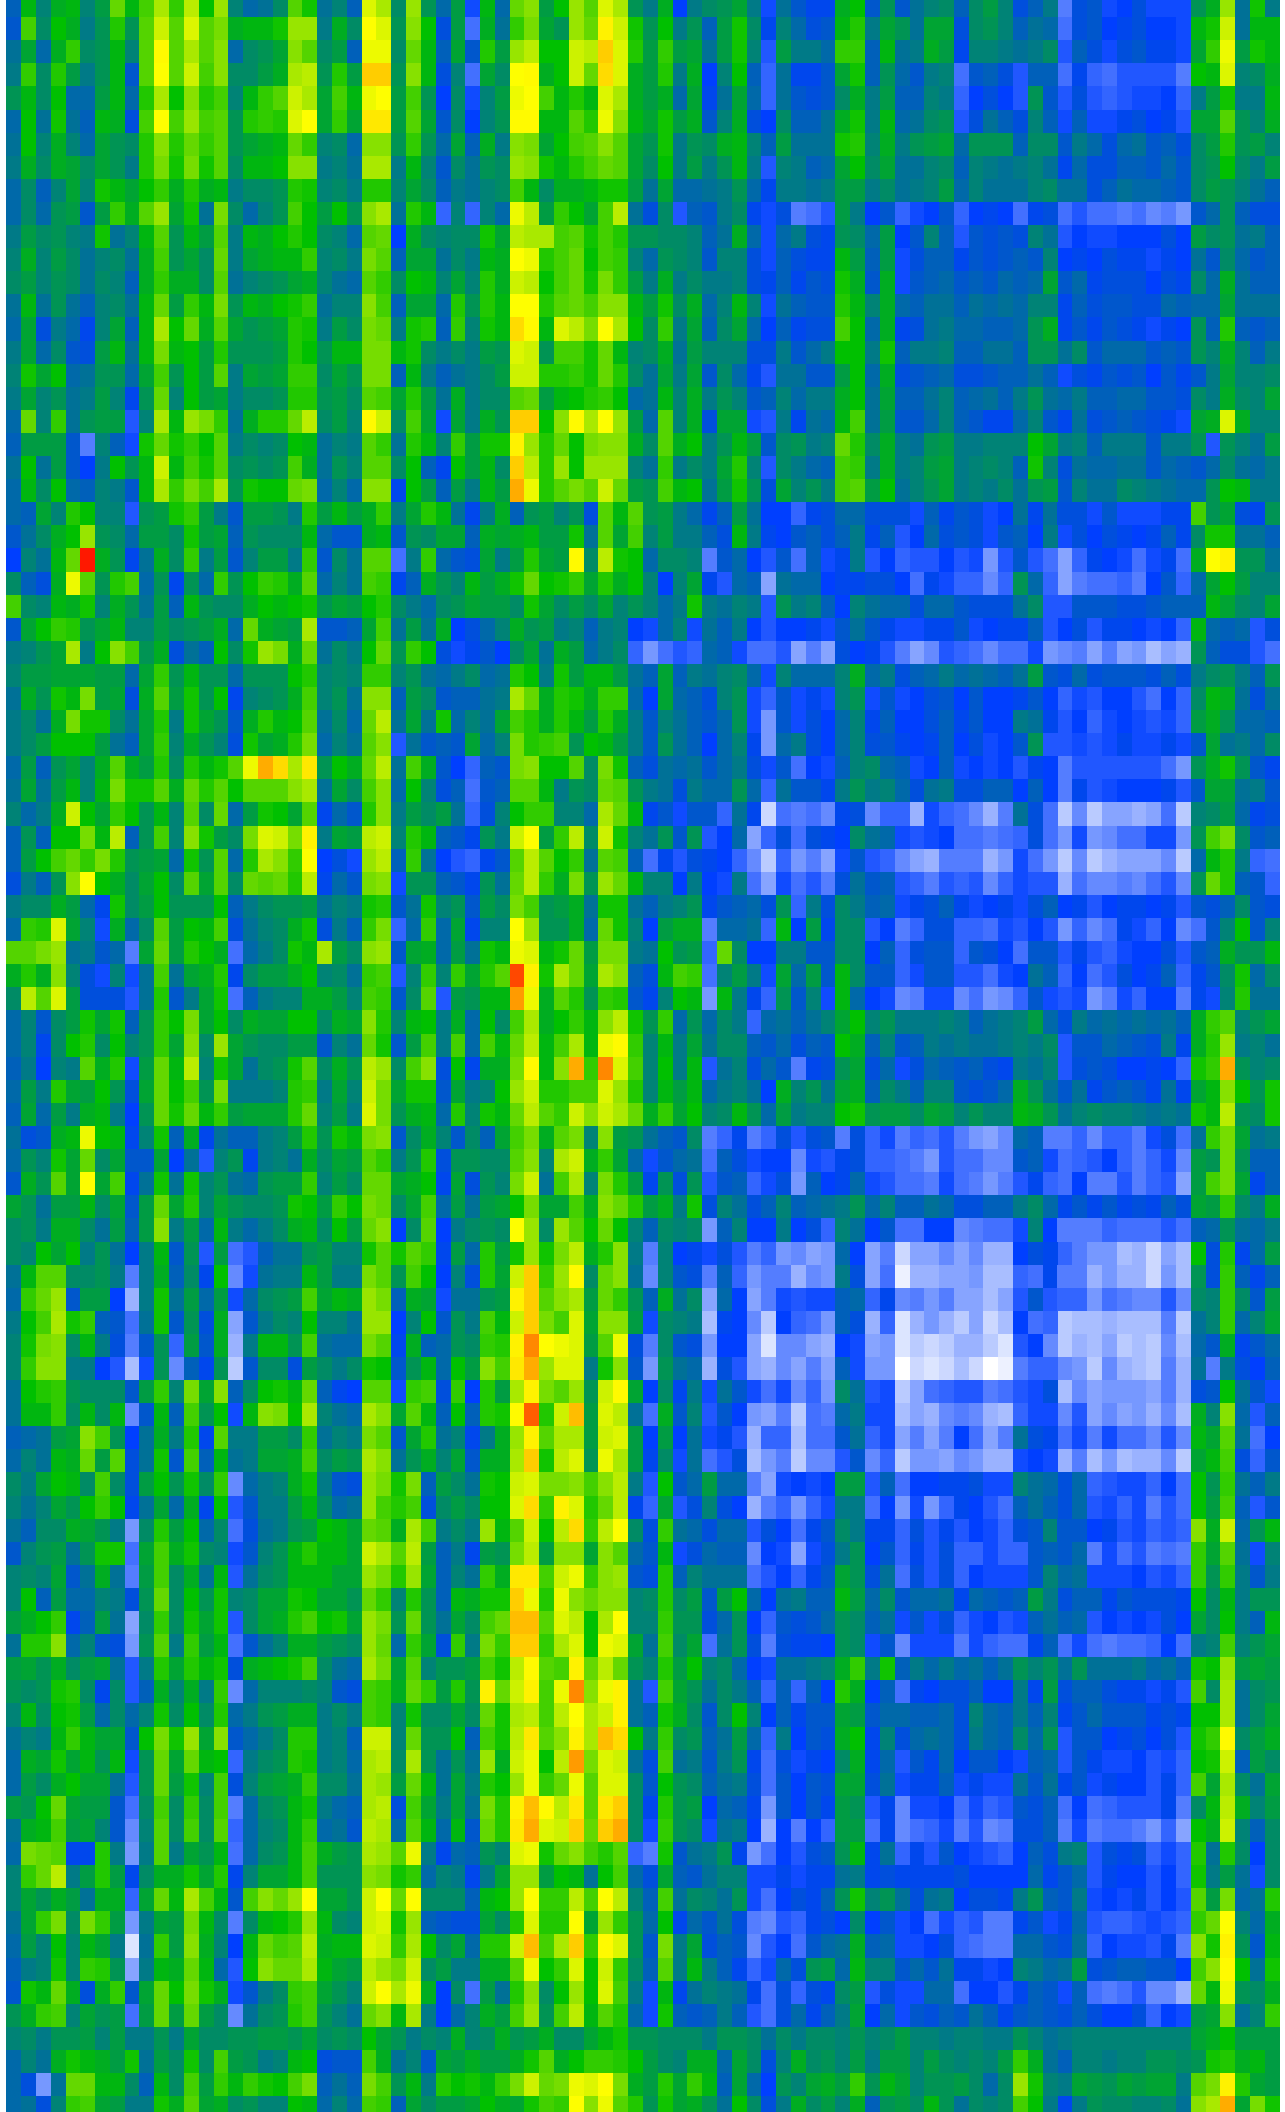

At4g37480  
At1g14640  
At4g25800  
At3g14710  
At3g08700  
At5g30500  
At4g04440  
At5g39230  
At1g34580  
At2g46660  
At2g16260  
At2g34360  
At2g07000  
At5g35470  
At5g55370  
At2g14060  
At3g51200  
At4g05240  
At3g07790  
At4g01810  
At2g42150  
At5g65080  
At1g25520  
At2g30330  
At1g77710  
At4g03000  
At5g15250  
At2g17730  
At2g39950  
At1g02580  
At1g16510  
At1g30220  
At1g53100  
At1g74780  
At2g12190  
At1g56560  
At5g17290  
At3g60590  
At5g57815  
At5g16980  
At5g16970  
At4g26120  
At1g23550  
At5g52590  
At1g50290  
At2g35820  
At3g58670  
At1g61000  
At5g49640  
At4g16330  
At3g16770  
At5g05710  
At4g18720  
At3g47640  
At3g44820  
At5g56140  
At1g01230  
At5g11600  
At1g16840  
At4g24220  
At2g18670  
At3g07560  
At1g78890  
At3g13550  
At1g80400  
At2g04690  
At4g21350  
At2g04550  
At5g16550  
At5g35960  
At1g12970  
At1g72175  
At2g44850  
At4g01280  
At2g44990  
At3g07930  
At2g39100  
At3g18770  
At5g26040  
At5g16380  
At1g07310  
At4g21500  
At1g22020  
At4g08320  
At1g12810  
At5g54680  
At2g35230  
At5g01980  
At1g68270  
At1g62920  
At4g15840  
At1g75730

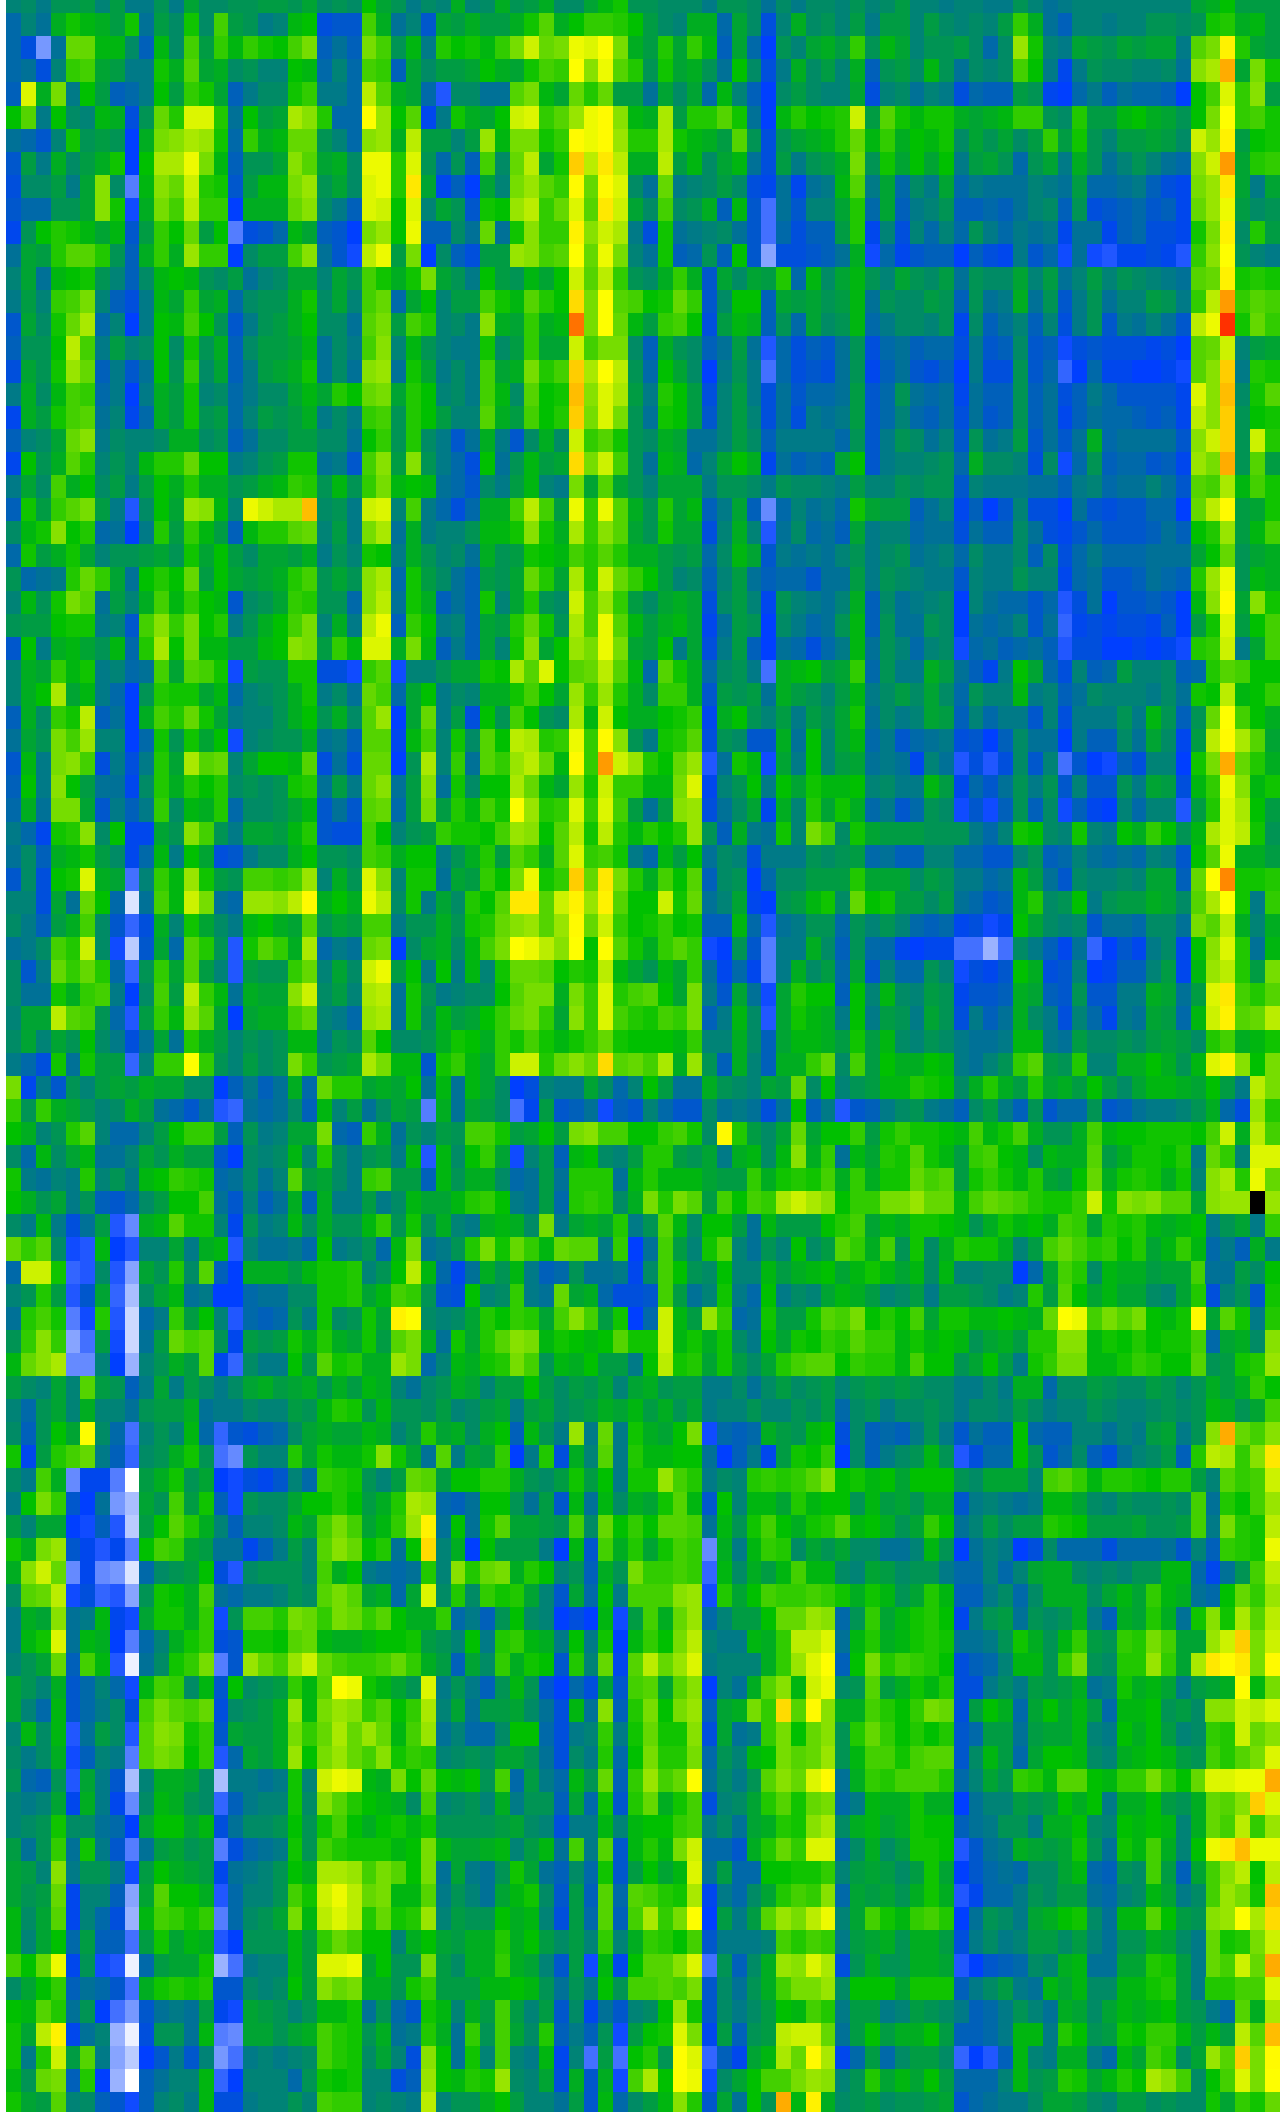

At1g66270  
At1g62920  
At4g15840  
At1g75730  
At3g58790  
At1g32150  
At5g49610  
At1g70360  
At3g15040  
At5g20120  
At3g53030  
At3g10210  
At2g45450  
At3g17280  
At1g21220  
At4g20370  
At3g14020  
At3g43930  
At2g40200  
At1g77400  
At1g30160  
At1g50960  
At4g27480  
At2g05870  
At5g27020  
At5g55810  
At4g13820  
At1g12210  
At1g28080  
At5g54930  
At5g45050  
At4g03960  
At1g71130  
At3g53690  
At1g69630  
At1g76820  
At5g16120  
At5g42200  
At5g58575  
At5g41560  
At5g48670  
At2g05630  
At3g61960  
At2g42670  
At1g68160  
At1g34590  
At5g63280  
At5g44510  
At3g05620  
At5g40920  
At1g33080  
At4g13195  
At1g18670  
At1g48370  
At1g27600  
At3g09570  
At2g25520  
At5g64090  
At4g36480  
At4g25680  
At3g44560  
At2g23440  
At5g58210  
At5g49950  
At5g13890  
At2g28520  
At3g63460  
At5g20990  
At5g53290  
At3g52190  
At1g50670  
At4g01400  
At3g53610  
At1g70450  
At5g45220  
At5g51930  
At4g01930  
At1g51070  
At3g02885  
At5g37980  
At2g28660  
At3g44510  
At2g22630  
At4g02180  
At4g13420  
At5g12880  
At2g03260  
At3g16330  
At2g21520  
At2g22480  
At5g63680  
At5g52020

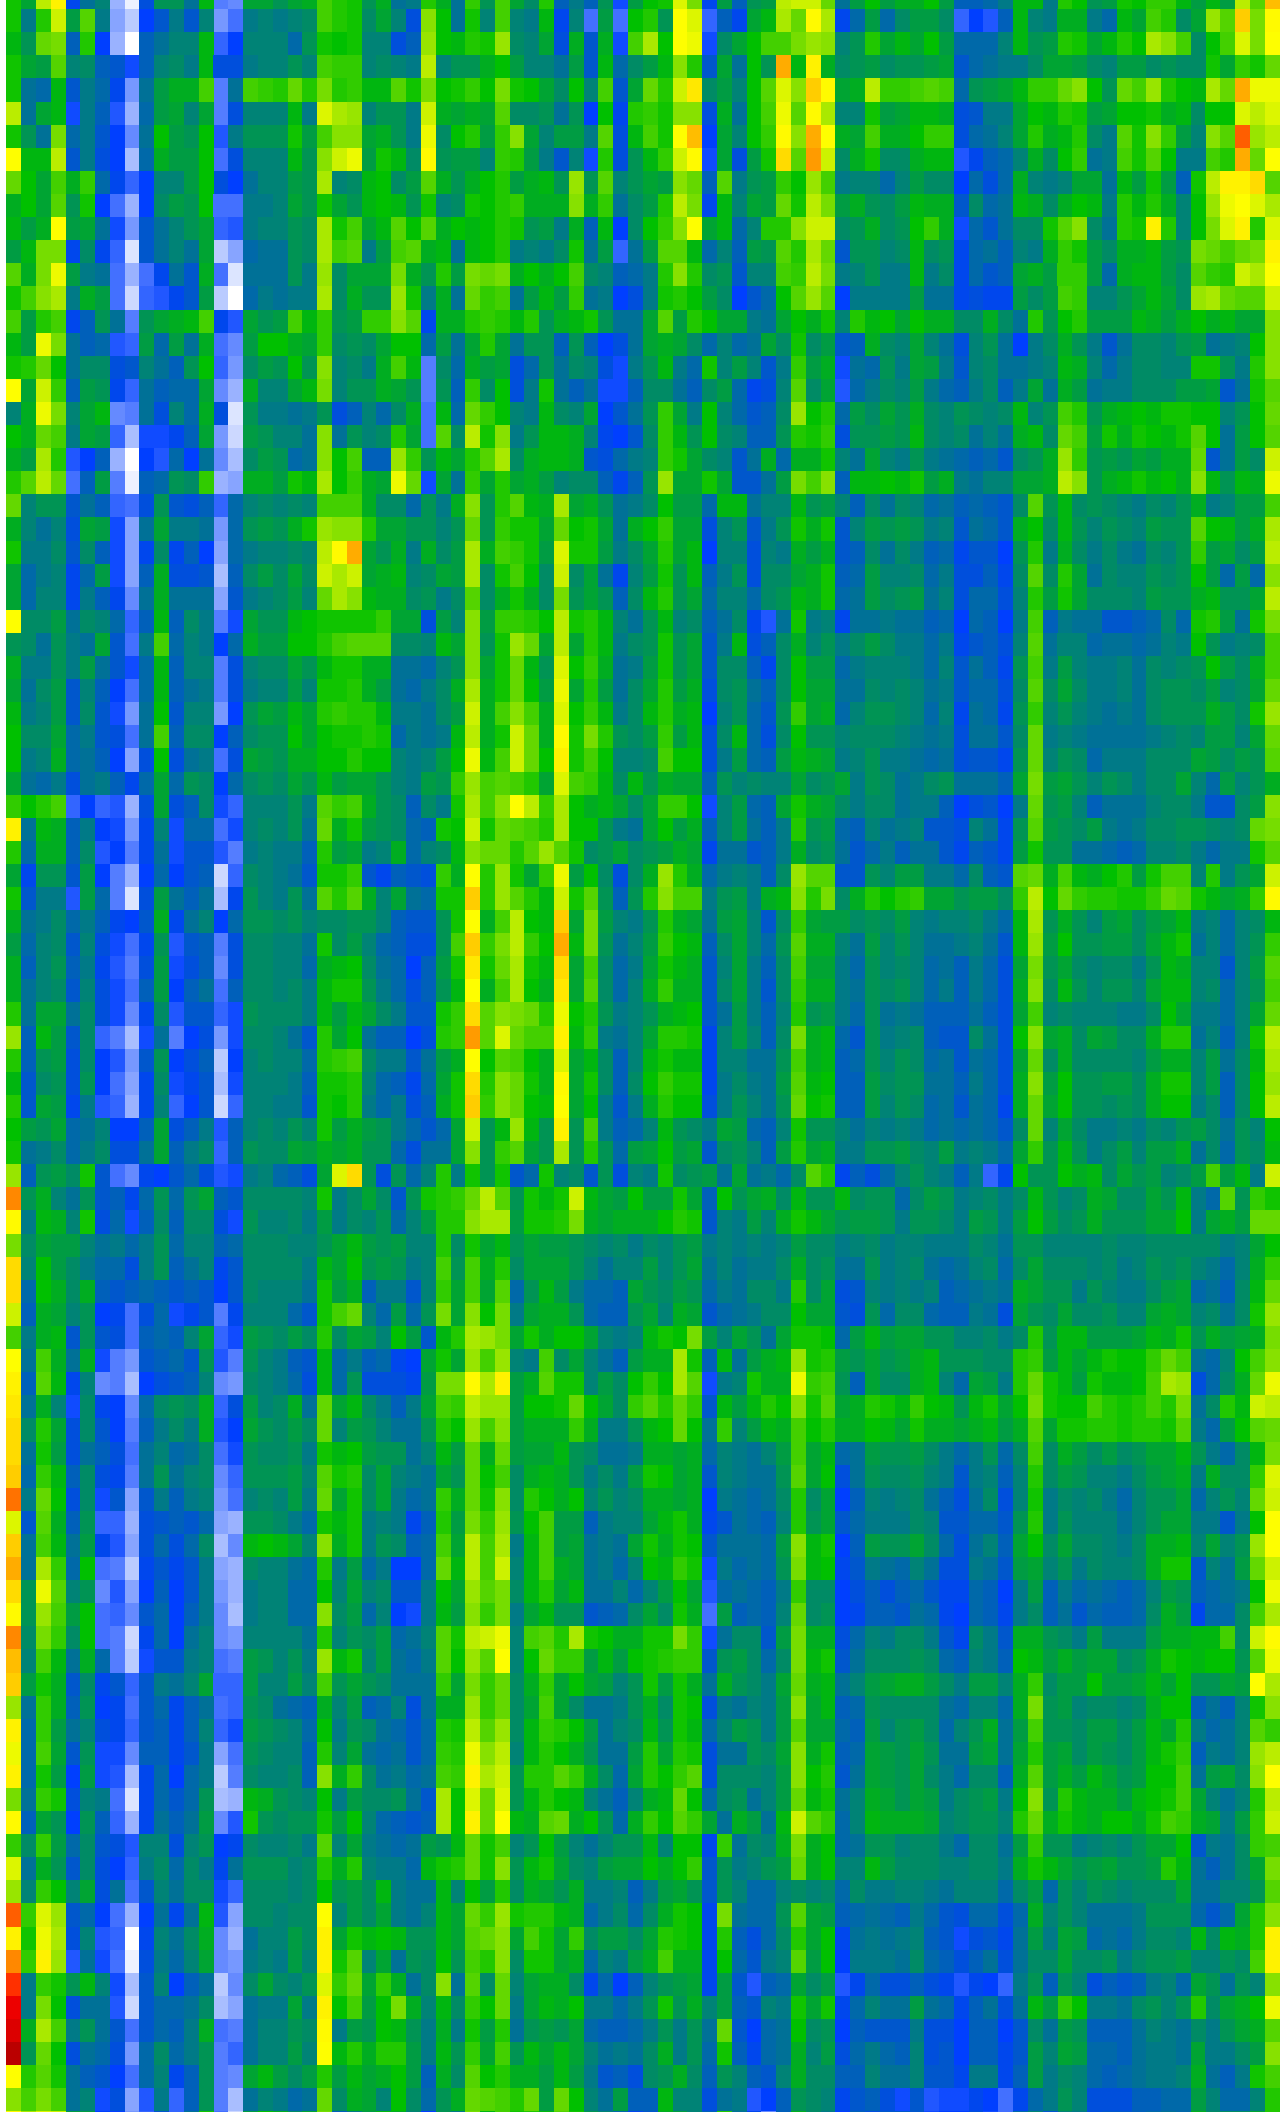

At2g22480  
At5g63680  
At5g52020  
At2g25790  
At2g41800  
At2g44450  
At2g22470  
At5g53830  
At5g49280  
At3g44520  
At1g52760  
At4g14350  
At5g50900  
At2g41160  
At3g53670  
At1g64700  
At5g41810  
At1g80290  
At5g37540  
At1g09280  
At4g32140  
At1g04330  
At1g72220  
At1g33700  
At5g56540  
At2g22510  
At1g28470  
At2g14095  
At2g01580  
At3g04370  
At2g40370  
At2g24430  
At5g07680  
At2g45420  
At1g03905  
At5g04370  
At3g24520  
At2g43390  
At1g29160  
At3g02940  
At1g12010  
At5g23190  
At1g53280  
At1g17310  
At3g12720  
At1g68850  
At5g09480  
At5g09530  
At3g22400  
At1g05280  
At3g46170  
At2g47520  
At4g12380  
At5g28520  
At5g28510  
At5g51470  
At2g34610  
At2g41160  
At5g17760  
At2g15490  
At3g19200  
At2g23170  
At3g55090  
At4g19720  
At2g29480  
At5g13750  
At5g58690  
At1g74590  
At2g15480  
At3g13100  
At1g61550  
At5g41380  
At1g59740  
At5g40010  
At4g36740  
At5g66700  
At2g01430  
At2g39350  
At1g23560  
At5g52690  
At3g14460  
At1g58340  
At1g68690  
At1g61370  
At2g24570  
At5g40690  
At5g51630  
At1g59590  
At5g62480  
At2g32510  
At3g02140

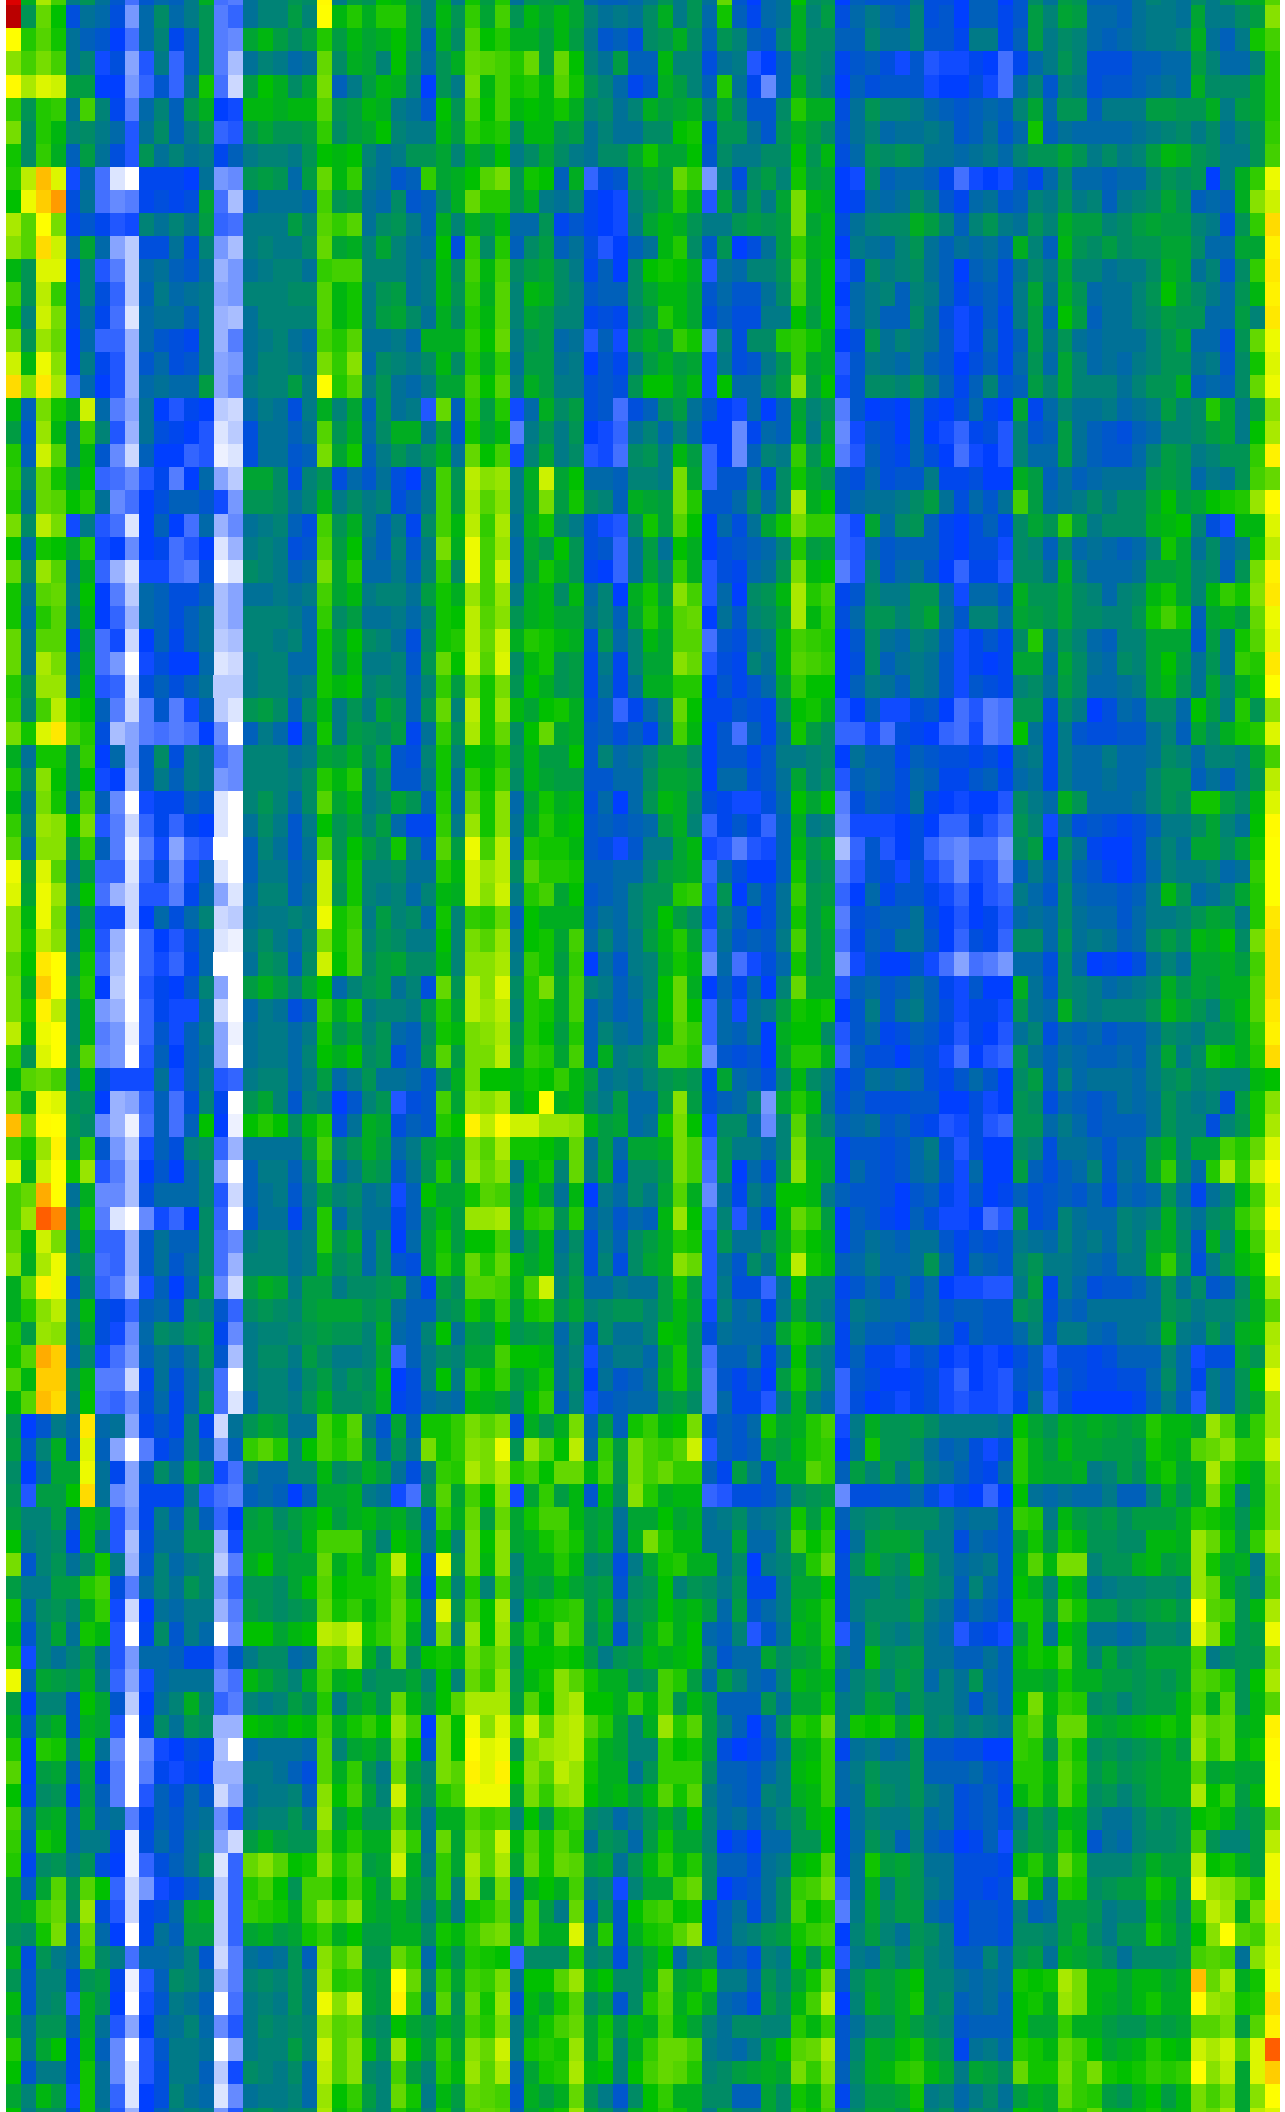

At5g62480  
At2g32510  
At3g02140  
At5g11650  
At2g33130  
At4g25380  
At2g44000  
At5g36880  
At5g04870  
At3g20860  
At2g13650  
At5g12420  
At1g74080  
At3g11340  
At3g59220  
At1g02360  
At2g47140  
At5g39950  
At5g45500  
At5g45510  
At5g20830  
At1g50360  
At3g46690  
At5g47050  
At1g64060  
At4g01920  
At5g11920  
At5g06860  
At3g05360  
At4g23700  
At2g02870  
At5g43900  
At3g14060  
At2g35730  
At1g70690  
At5g54840  
At1g04440  
At5g03380  
At1g10050  
At3g18560  
At5g22630  
At2g17290  
At3g59660  
At3g63010  
At4g36990  
At3g19660  
At2g44810  
At3g18440  
At1g61140  
At3g58600  
At1g49050  
At2g38860  
At5g15730  
At5g02780  
At3g53150  
At1g10410  
At4g10210  
At2g30750  
At4g22530  
At1g65690  
At3g50260  
At4g38800  
At1g69510  
At5g09830  
At1g26550  
At2g40470  
At2g03200  
At2g47270  
At1g29050  
At4g18550  
At5g02420  
At3g15890  
At1g21140  
At1g34110  
At5g49710  
At3g28690  
At1g31120  
At2g19580  
At3g51910  
At4g16110  
At3g25585  
At5g43320  
At5g59150  
At2g17380  
At4g40060  
At2g29660  
At4g14010  
At1g30840  
At3g16340  
At2g28250  
At3g60490

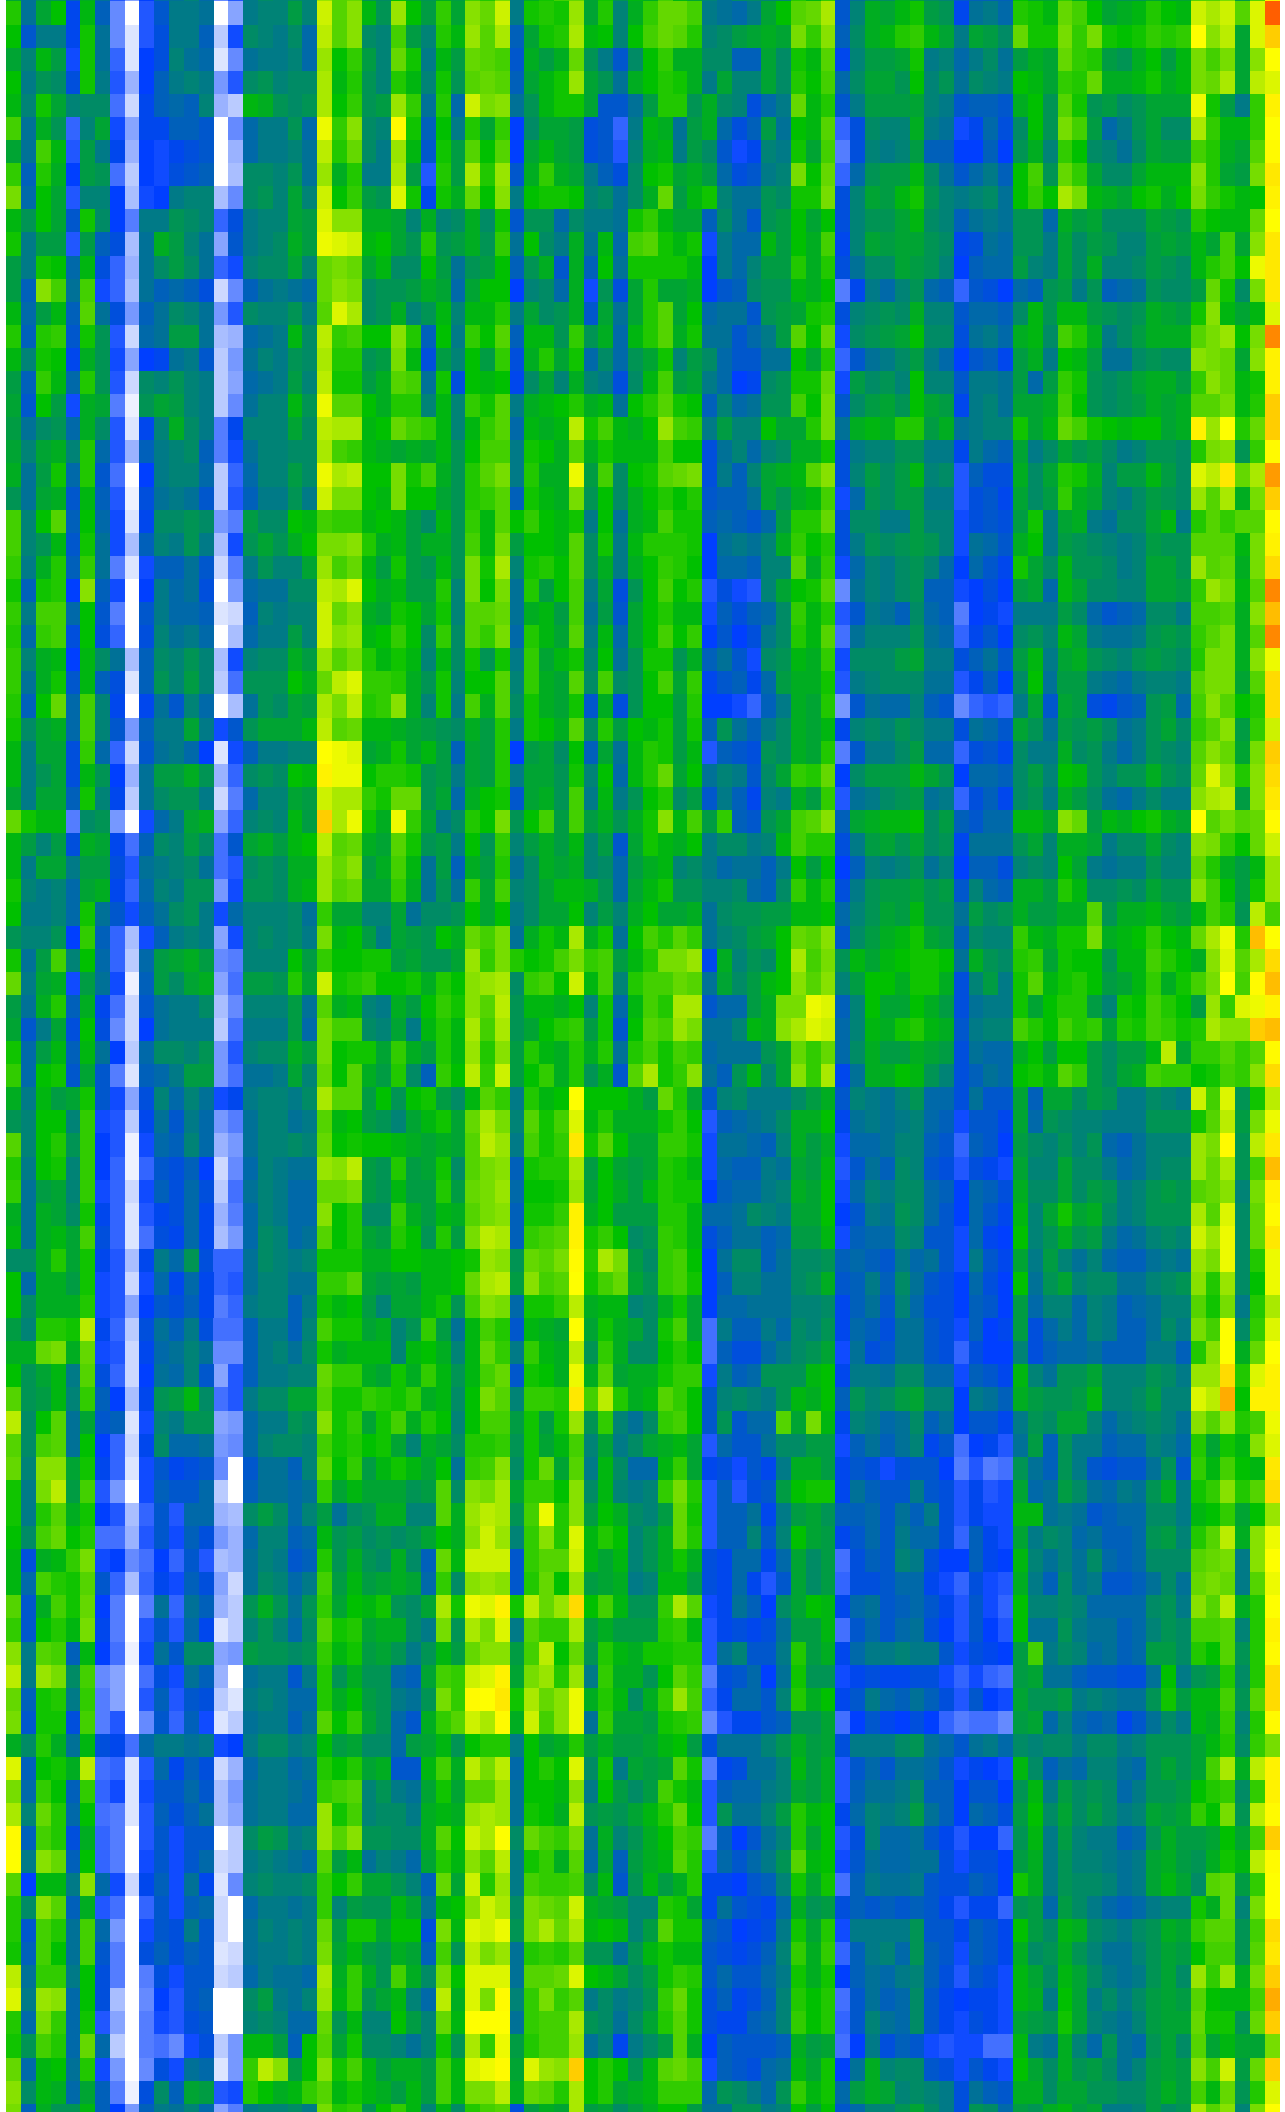

At3g16340  
At2g28250  
At3g60490  
At1g10460  
At4g20300  
At4g35350  
At1g52140  
At2g27140  
At3g55370  
At4g21780  
At2g28690  
At4g18630  
At2g01520  
At3g26460  
At4g11530  
At1g02950  
At1g03210  
At1g31770  
At1g66020  
At4g18610  
At5g65970  
At2g41690  
At1g79180  
At5g48560  
At5g58375  
At2g03450  
At3g20960  
At3g43430  
At5g24090  
At2g16790  
At1g43040  
At5g05960  
At4g16400  
At5g02640  
At2g12400  
At5g45970  
At4g33330  
At4g33330  
At1g69230  
At3g54260  
At5g40230  
At3g61850  
At2g41480  
At1g28400  
At1g17960  
At5g47940  
At5g19040  
At1g72360  
At5g38280  
At5g25890  
At3g53980  
At2g04800  
At1g18890  
At3g50350  
At1g48500  
At4g30460  
At5g43910  
At1g23850  
At3g18280  
At2g37280  
At1g61820  
At2g31180  
At3g15430  
At3g53780  
At5g25110  
At4g14580  
At2g21560  
At5g06850  
At5g25770  
At3g14280  
At3g27880  
At3g10500  
At3g57380  
At3g14990  
At1g64160  
At4g39955  
At2g29490  
At3g25730  
At3g47720  
At1g01010  
At2g15230  
At3g13310  
At1g26440  
At5g61250  
At1g06840  
At4g24400  
At1g30270  
At5g05760  
At5g44790  
At4g12350  
At1g01110

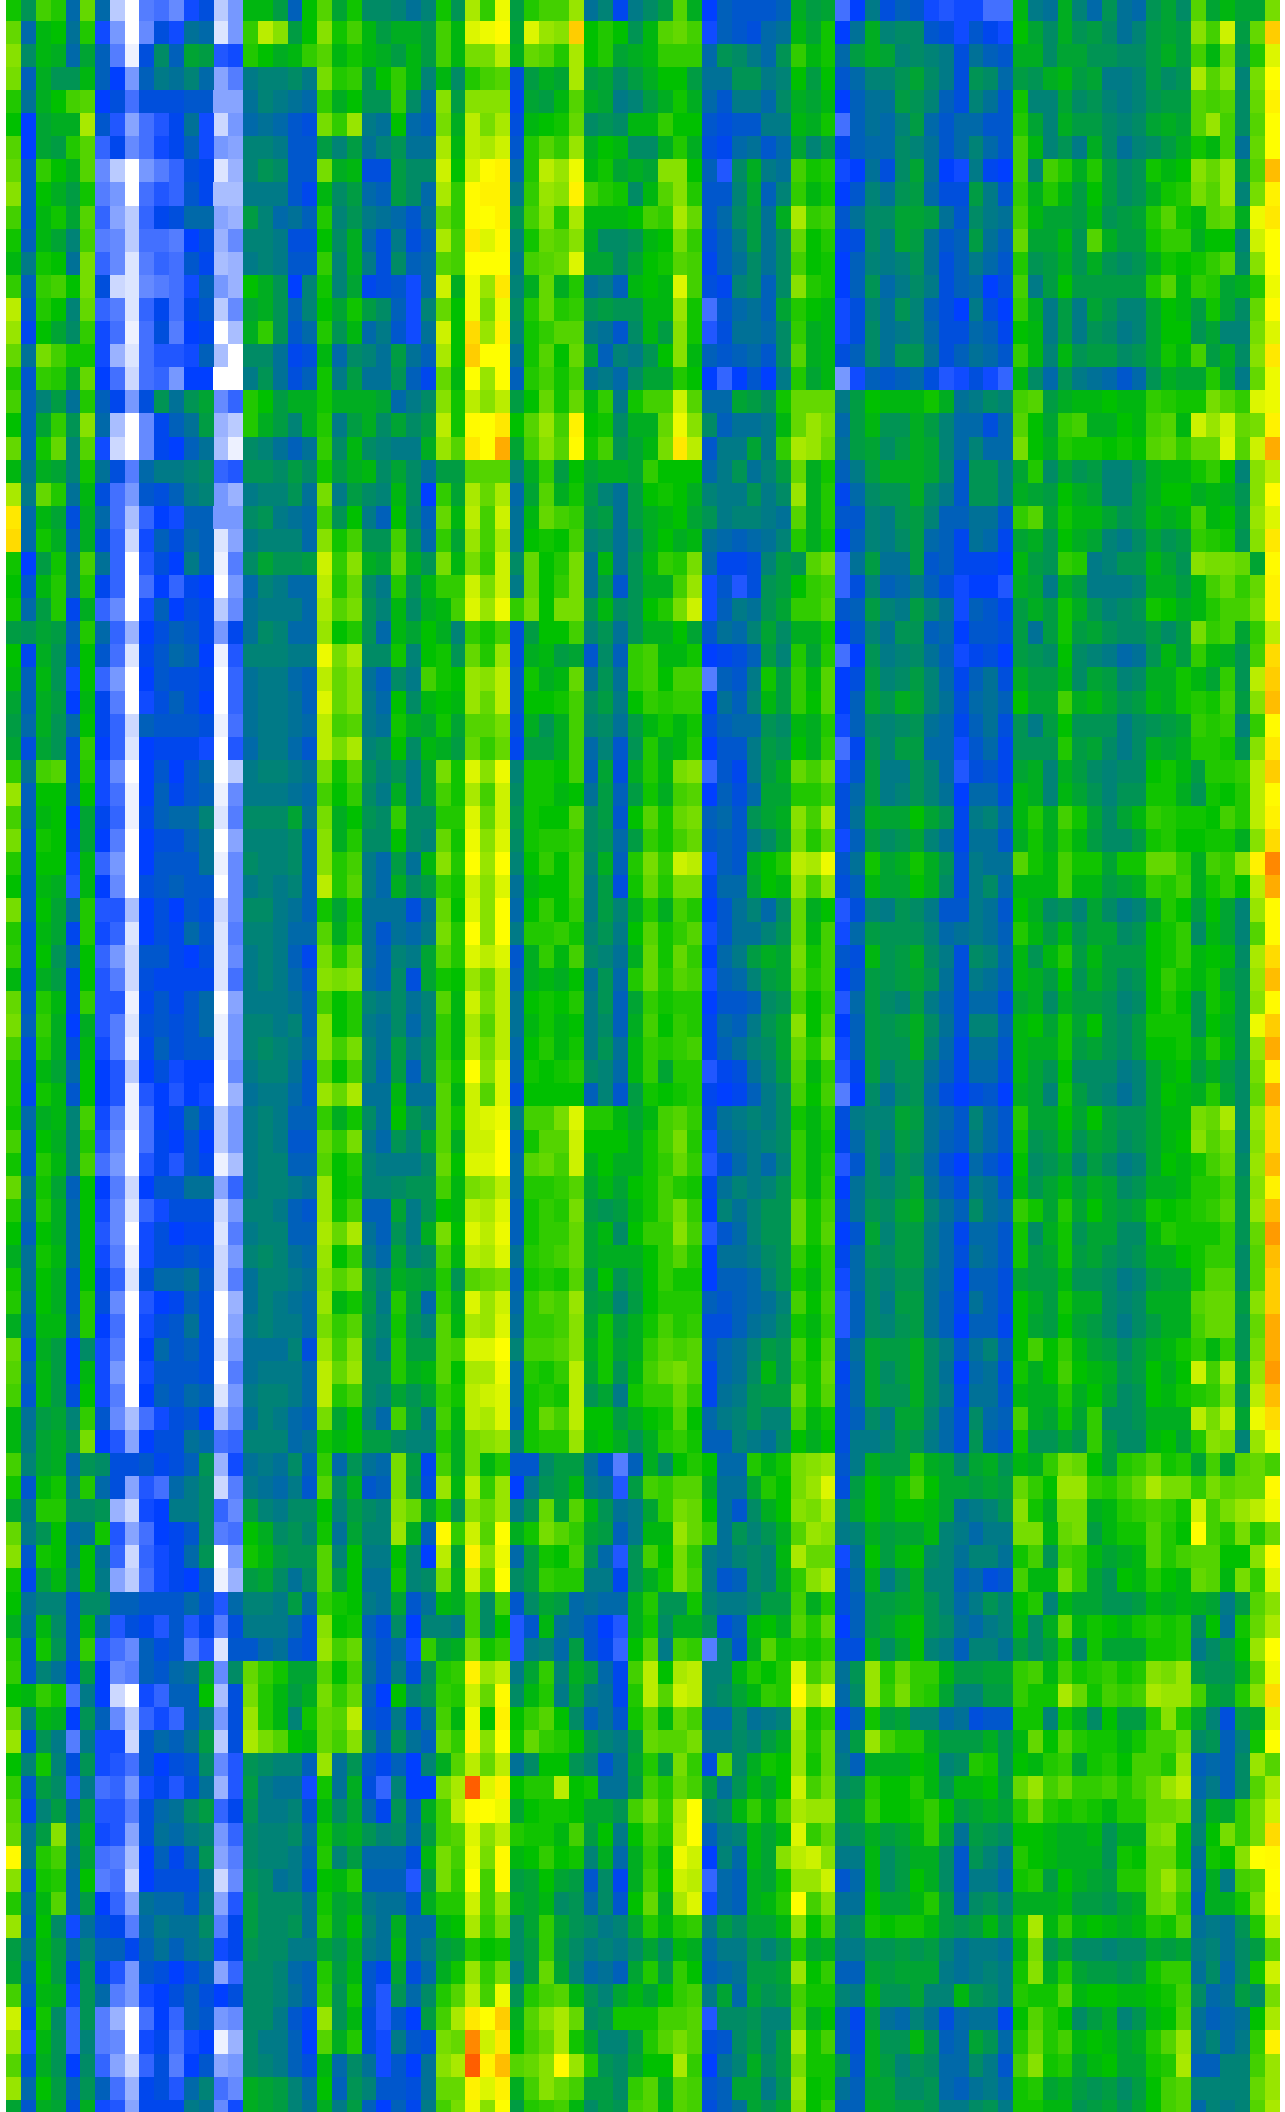

At5g05760  
At5g44790  
At4g12350  
At4g01440  
At2g26170  
At5g39340  
At1g30400  
At4g37940  
At5g59530  
At4g39190  
At4g13280  
At1g52710  
At5g22950  
At2g44480  
At1g26930  
At1g03080  
At5g04080  
At3g21420  
At2g43080  
At1g60420  
At4g16920  
At4g01740  
At1g70500  
At1g14730  
At5g23600  
At2g40970  
At3g03520  
At2g36120  
At4g01450  
At1g11580  
At3g23430  
At4g30450  
At1g73330  
At5g37740  
At3g12500  
At3g26550  
At5g22550  
At5g53320  
At1g12160  
At2g48090  
At1g80830  
At2g36090  
At1g68880  
At4g11650  
At4g36430  
At3g49760  
At2g45830  
At3g12090  
At4g31730  
At2g34830  
At2g30840  
At5g10210  
At5g05790  
At1g68940  
At5g43180  
At1g49310  
At1g67710  
At4g34600  
At5g63930  
At2g26640  
At3g27150  
At3g19370  
At4g14060  
At4g02540  
At1g71860  
At3g50590  
At2g44770  
At1g59650  
At2g01660  
At2g34530  
At5g10170  
At1g59960  
At1g11660  
At1g14830  
At3g05170  
At3g26690  
At1g74110  
At2g30500  
At2g15790  
At2g45920  
At5g06730  
At2g41380  
At3g47050  
At5g10100  
At2g22590  
At2g26820  
At2g18650  
At2g30130  
At3g14680  
At5g17430  
At1g10300  
At3g50200

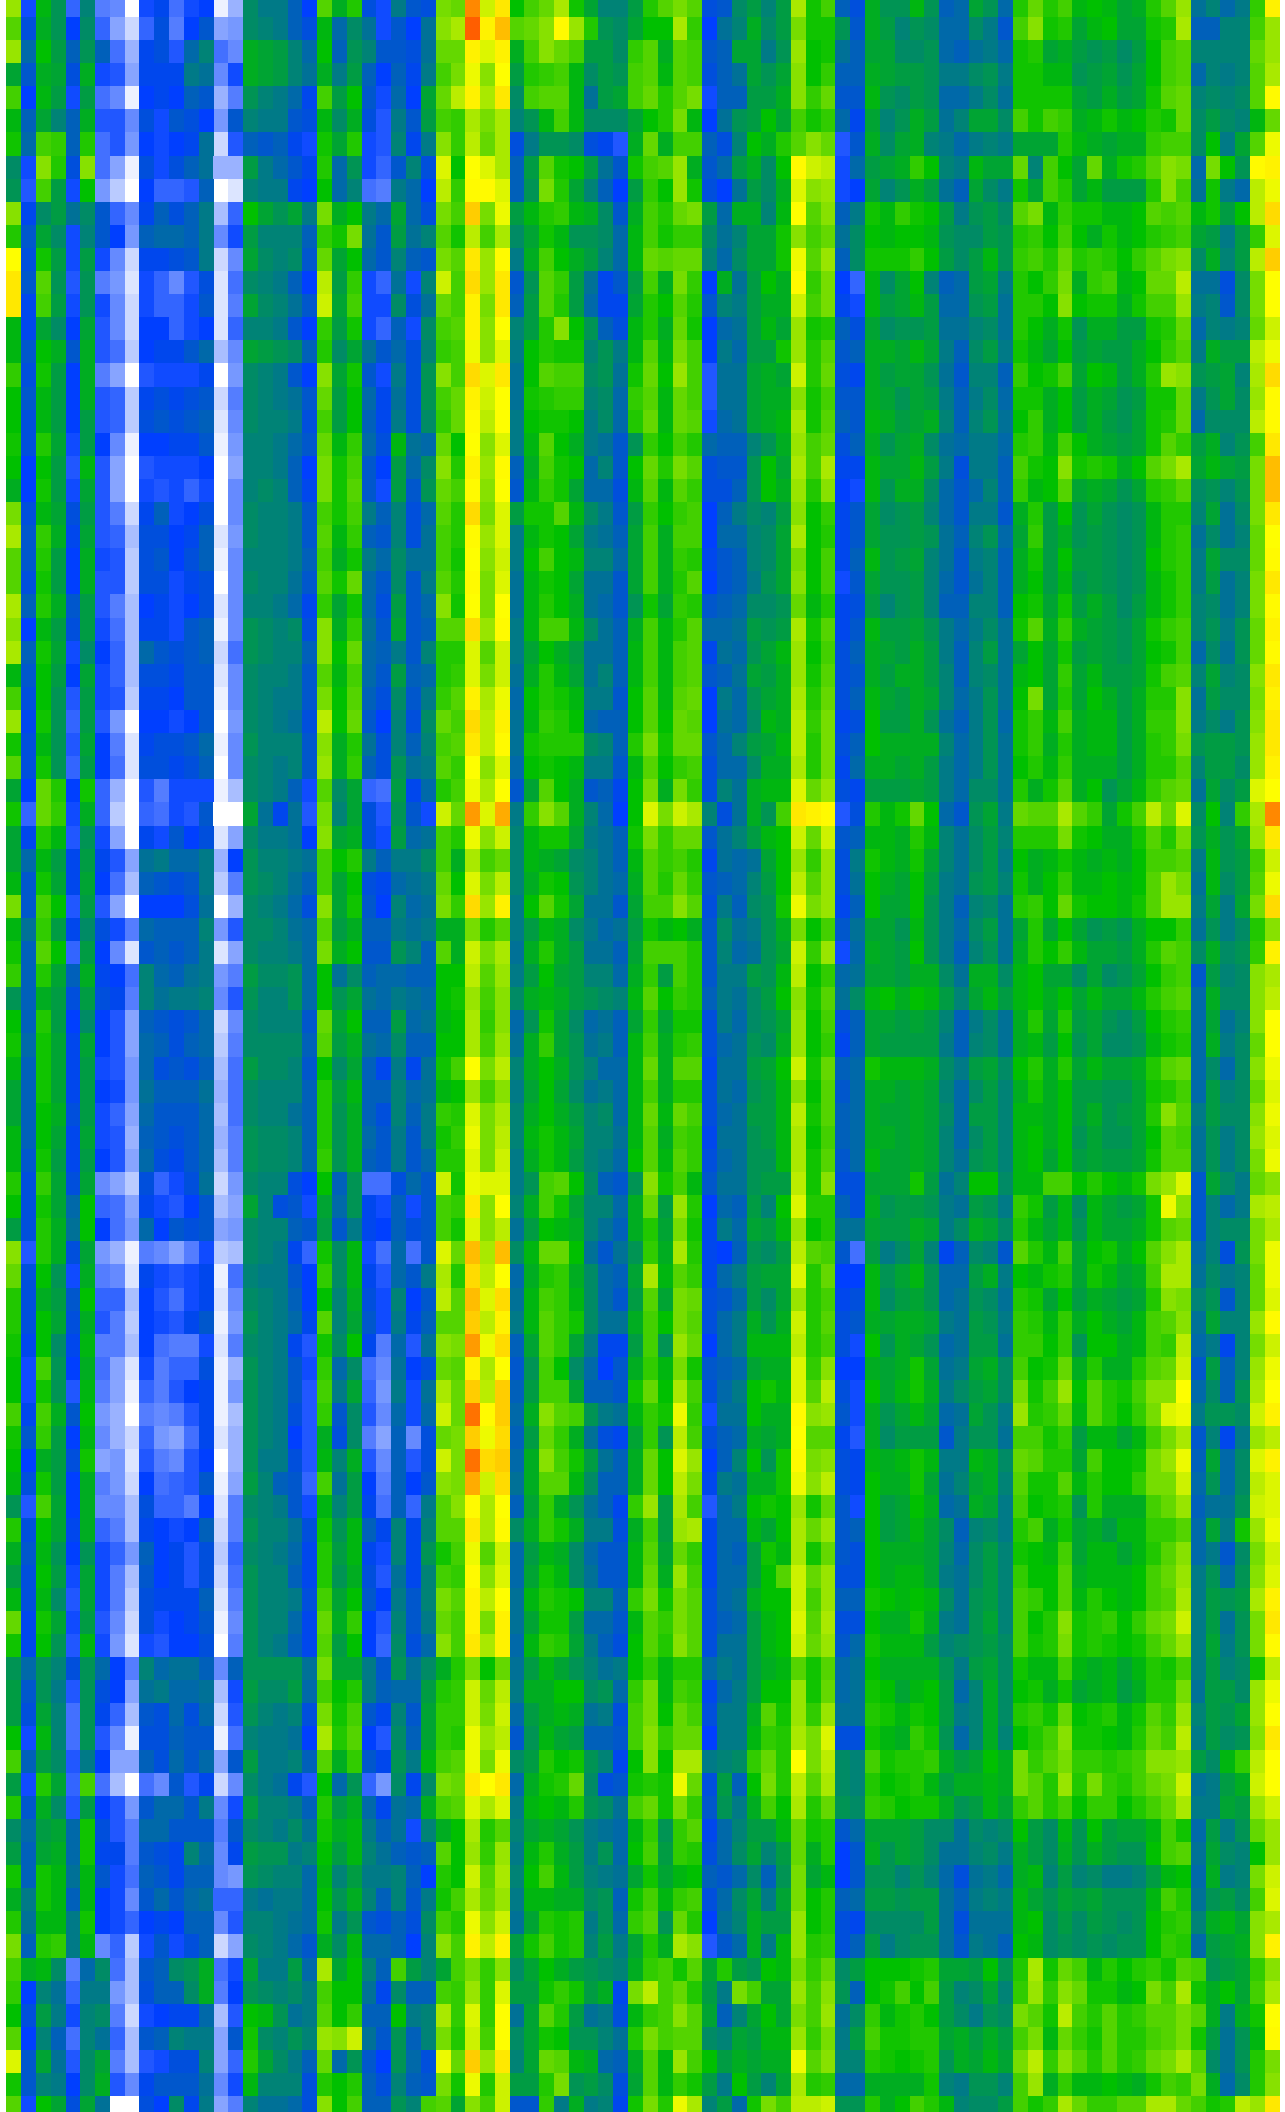

At3g14680  
At5g17430  
At1g10300  
At3g50200  
At3g46500  
At3g28380  
At5g53560  
At1g74770  
At2g17050  
At3g14570  
At2g47460  
At4g37730  
At1g58190  
At5g43030  
At4g14980  
At3g27473  
At3g15240  
At3g30350  
At5g48940  
At4g04990  
At3g04570  
At1g31060  
At3g44540  
At5g48175  
At2g23030  
At5g22890  
At3g46650  
At5g43730  
At3g11370  
At5g54040  
At4g00080  
At5g10720  
At5g42630  
At2g43610  
At5g56320  
At4g31100  
At2g28780  
At1g60130  
At5g22555  
At5g06740  
At5g52670  
At1g36640  
At3g60470  
At2g30670  
At5g45070  
At5g45080  
At1g33540  
At5g41280  
At3g27070  
At4g15370  
At1g50090  
At5g52720  
At3g28510  
At3g12220  
At5g53990  
At1g53990  
At5g67430  
At4g11880  
At1g51840  
At5g05900  
At1g33750  
At3g15230  
At4g15350  
At1g51830  
At3g50190  
At2g19970  
At1g08430  
At1g10400  
At4g15300  
At1g48510  
At1g55430  
At2g43600  
At3g30260  
At4g19980  
At1g56680  
At1g74500  
At1g35220  
At2g23050  
At5g52170  
At3g54310  
At2g32740  
At5g61280  
At2g28755  
At3g27500  
At1g02220  
At2g01150  
At3g59850  
At1g30080  
At2g43840  
At1g11000  
At4g24140  
At3g49390





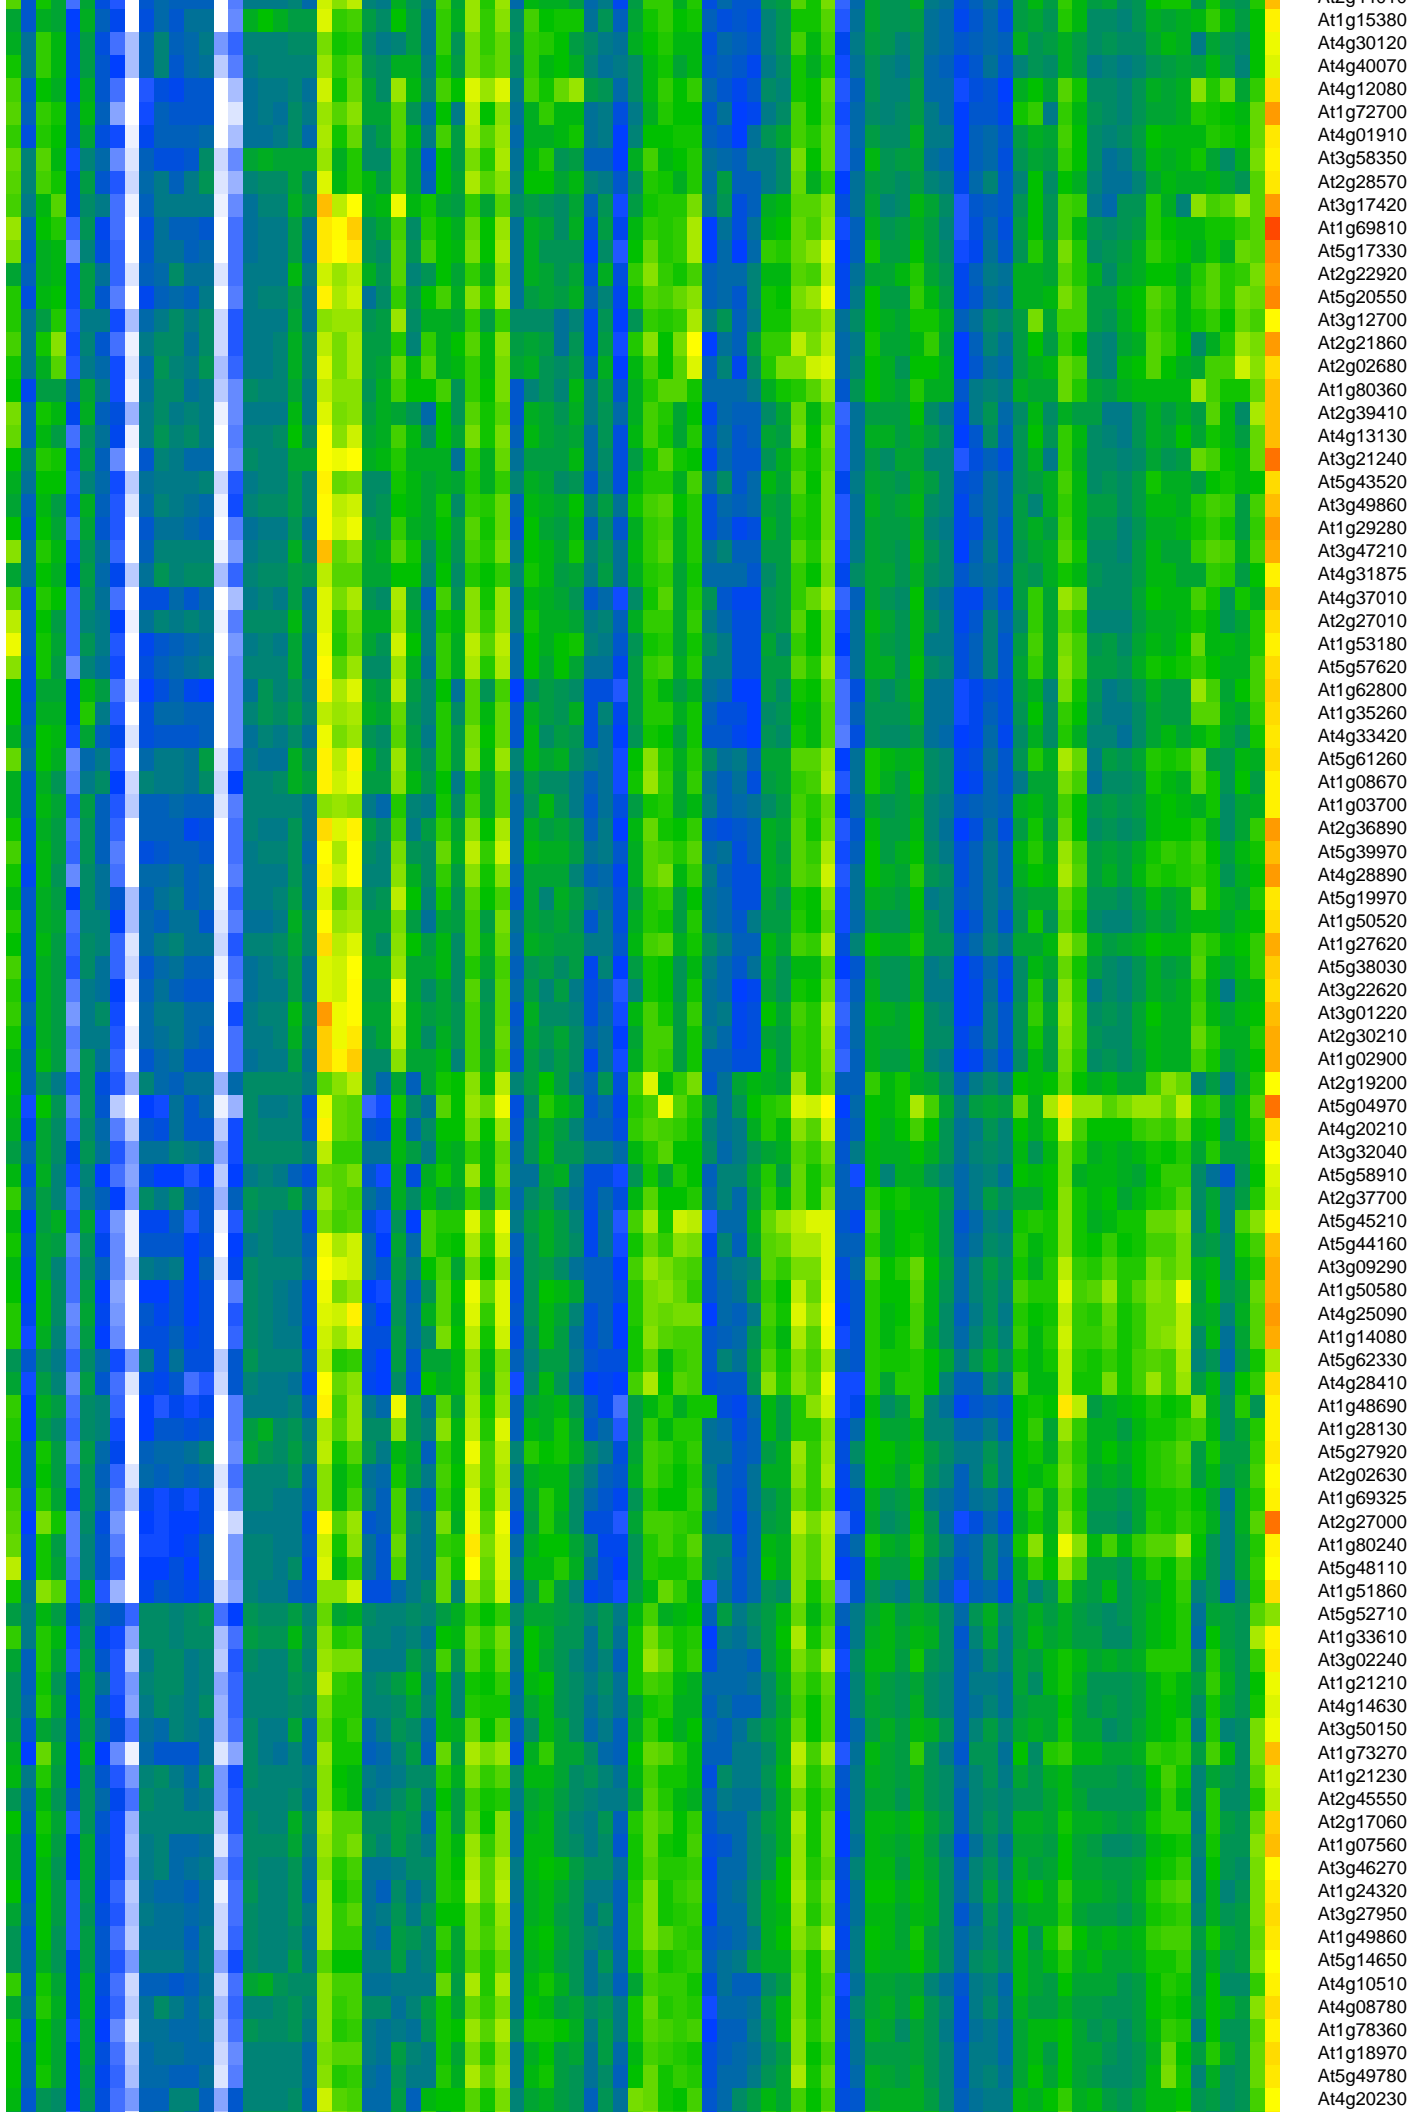



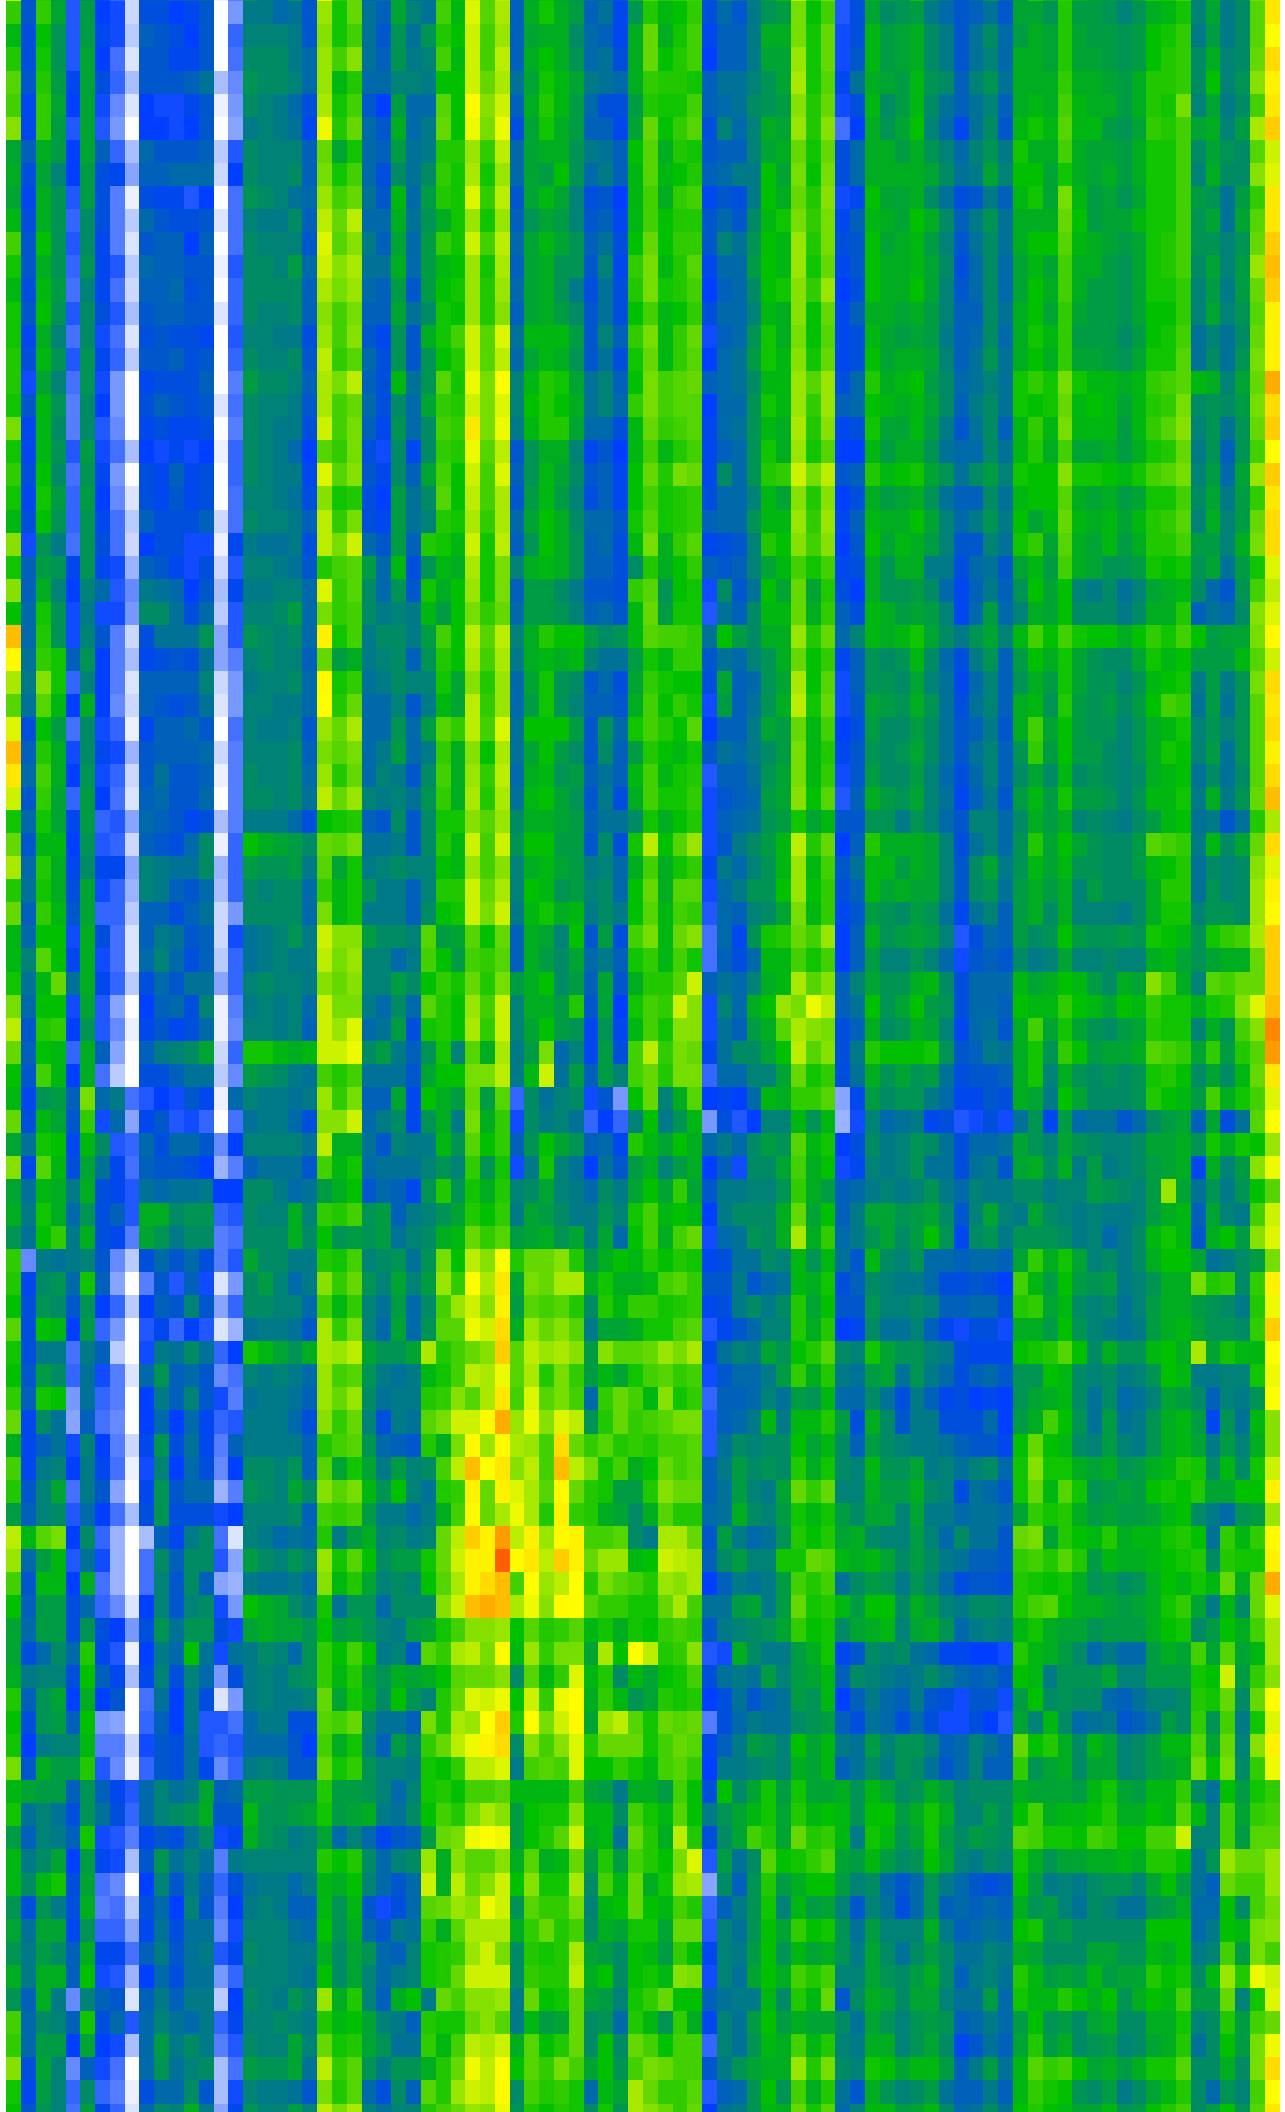

At3g45410  
At2g29330  
At3g54040  
At1g04180  
At2g37440  
At5g65790  
At1g61840  
At2g47560  
At1g32450  
At5g02350  
At2g32610  
At3g46720  
At1g64920  
At5g60530  
At2g25980  
At1g31950  
At2g36290  
At1g73160  
At2g30340  
At1g52070  
At1g03840  
At5g24070  
At1g44050  
At5g53460  
At1g55990  
At1g14390  
At5g50300  
At1g14040  
At1g79310  
At5g15130  
At3g07600  
At3g53480  
At1g78340  
At1g54890  
At1g78000  
At2g43590  
At1g51420  
At3g11390  
At1g61480  
At3g13090  
At3g50010  
At4g08770  
At3g61410  
At2g34140  
At2g26290  
At5g63990  
At5g56630  
At1g65930  
At1g07610  
At1g03010  
At5g62630  
At4g31970  
At2g02250  
At4g14390  
At4g33090  
At5g57840  
At1g55740  
At5g65210  
At5g54800  
At4g15380  
At4g32650  
At5g05880  
At1g29820  
At3g27580  
At1g31470  
At3g26330  
At2g18090  
At1g15110  
At1g56145  
At3g30380  
At5g02070  
At4g36860  
At3g03270  
At5g65660  
At3g61990  
At2g17150  
At4g10380  
At4g09940  
At2g03830  
At5g39820  
At2g16060  
At5g19550  
At5g66985  
At4g33070  
At5g10040  
At3g43190  
At4g39675  
At4g37295  
At1g51190  
At5g62260  
At3g24240  
At2g42660

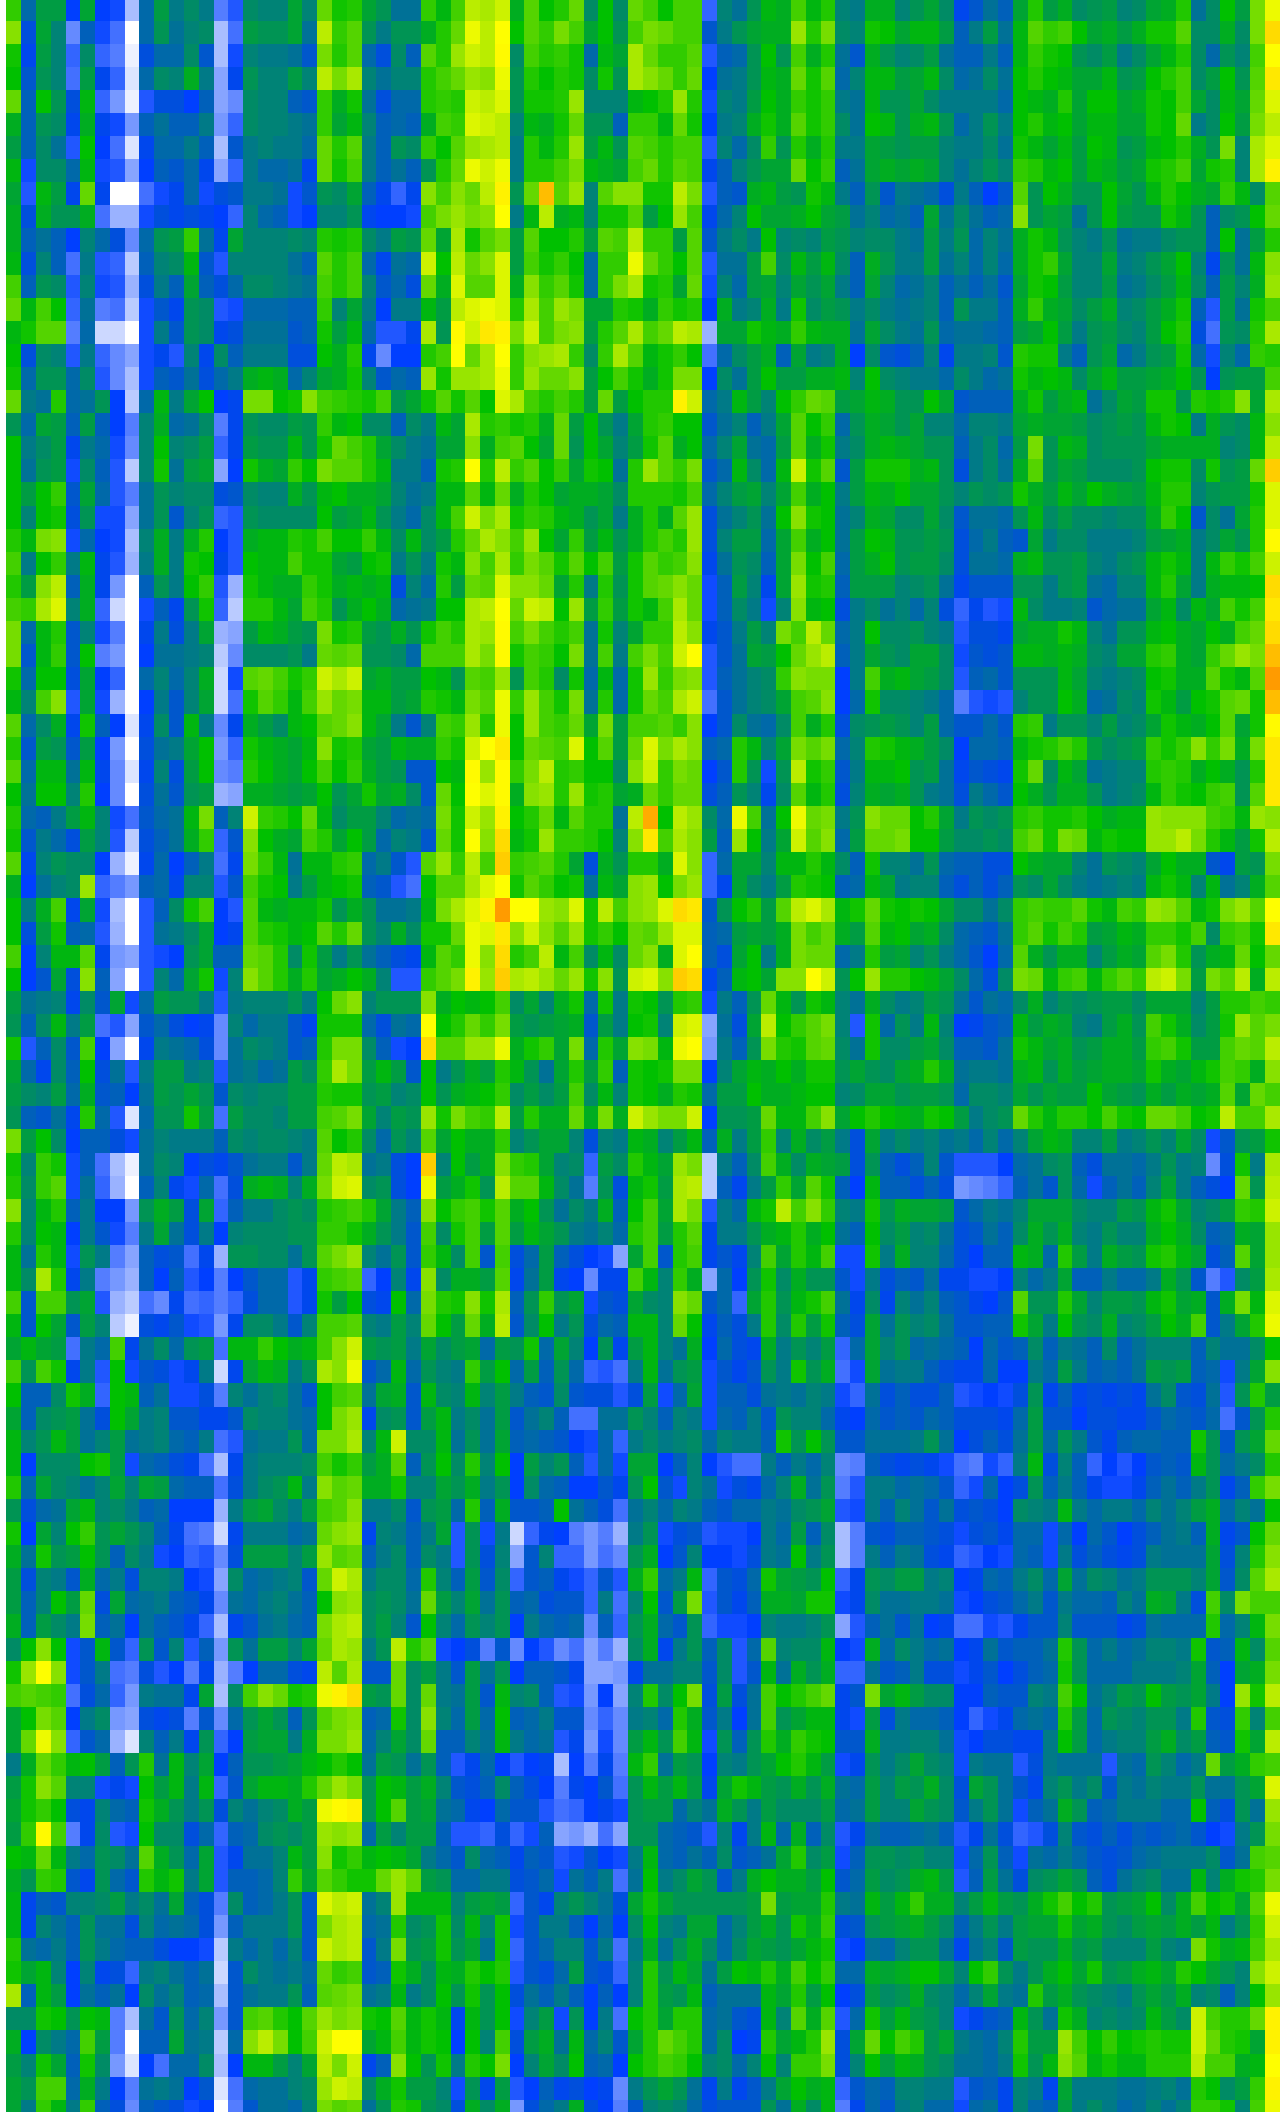

At1g51190  
At5g62260  
At3g24240  
At2g42660  
At1g10522  
At2g04025  
At2g19590  
At1g18690  
At5g10780  
At3g27570  
At5g13870  
At5g19520  
At1g66470  
At1g26270  
At3g19130  
At3g55720  
At4g39430  
At3g55730  
At2g02580  
At2g46130  
At3g14780  
At1g34410  
At4g09300  
At1g11100  
At4g26380  
At3g03610  
At5g65290  
At1g63440  
At4g18360  
At4g35380  
At5g02100  
At2g02380  
At2g39300  
At1g06780  
At3g55910  
At3g53350  
At2g19110  
At5g66760  
At2g46390  
At1g20575  
At2g16910  
At3g63150  
At2g42680  
At2g34080  
At2g43140  
At3g48170  
At5g42990  
At2g11150  
At4g32690  
At4g15230  
At3g17240  
At2g44350  
At3g04420  
At5g22910  
At5g64440  
At5g55610  
At2g16950  
At2g32850  
At2g19800  
At1g35670  
At5g24390  
At3g52740  
At5g37550  
At5g20110  
At2g40260  
At2g24580  
At1g66200  
At1g48600  
At5g04950  
At3g46900  
At4g04830  
At5g11710  
At5g09890  
At1g65840  
At3g16760  
At2g20760  
At2g27030  
At4g36640  
At3g14850  
At1g17890  
At3g09280  
At4g19490  
At2g41310  
At3g45680  
At1g60710  
At4g01850  
At5g07870  
At5g09850  
At3g56950  
At3g46830  
At4g34050  
At1g02500

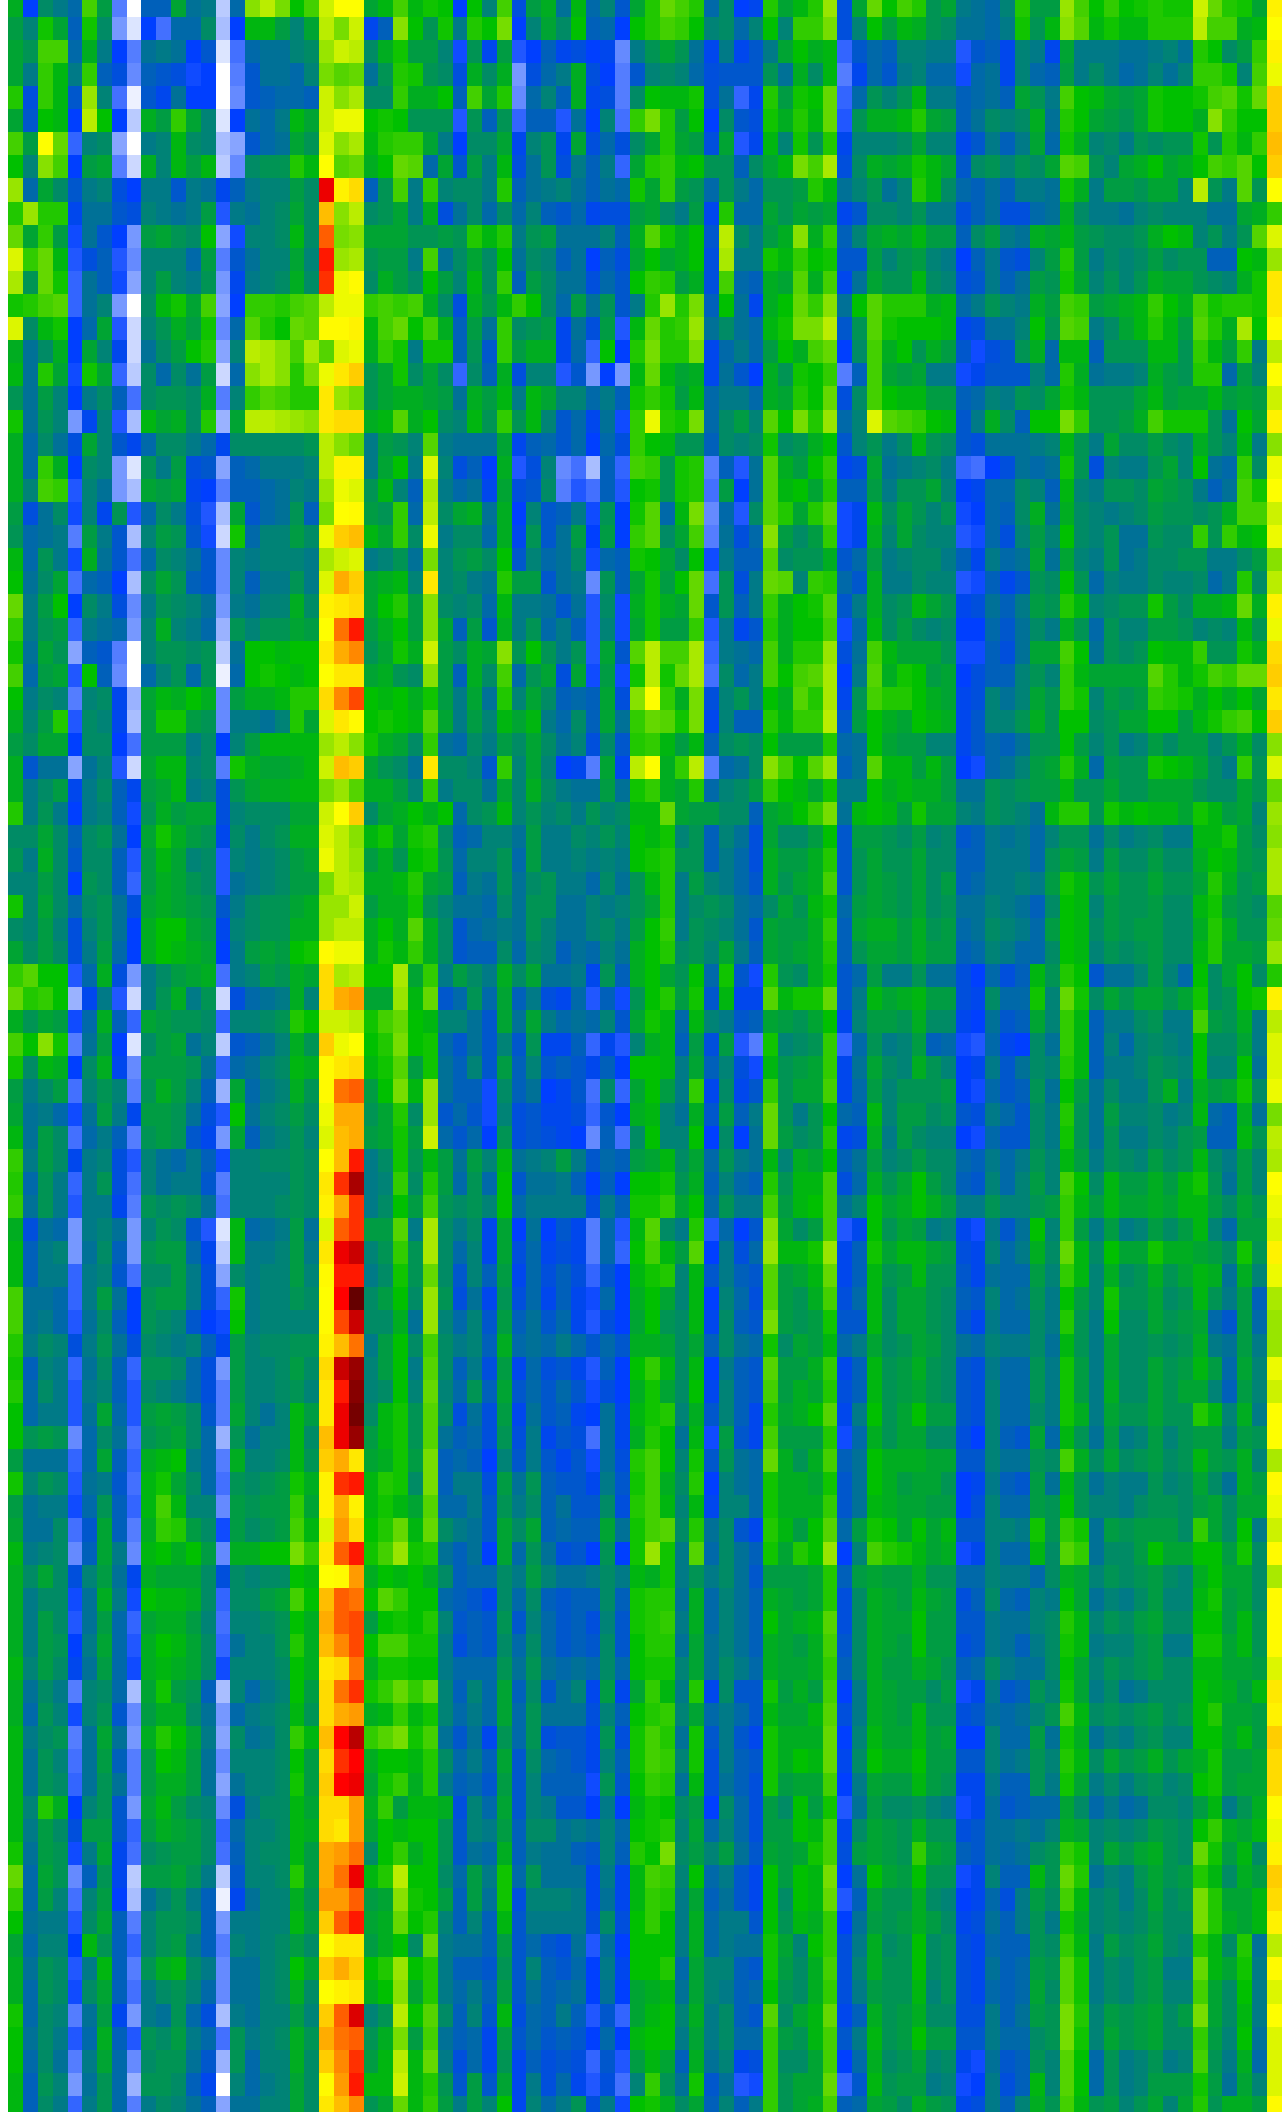

At3g66950  
At3g46830  
At4g34050  
At1g02500  
At2g33620  
At1g63460  
At1g17500  
At5g19930  
At4g35210  
At5g38700  
At2g26480  
At3g51680  
At5g40590  
At2g05260  
At3g51460  
At3g27380  
At4g23710  
At3g02850  
At3g10660  
At3g20940  
At4g35260  
At1g53310  
At3g43600  
At1g14210  
At5g35940  
At3g44320  
At2g01880  
At3g51540  
At1g24180  
At3g22850  
At3g61310  
At4g34880  
At1g23160  
At5g50850  
At1g50720  
At1g11920  
At1g49570  
At5g19890  
At1g70880  
At1g07680  
At4g08620  
At4g22640  
At4g30290  
At3g03050  
At3g59730  
At4g21850  
At4g14640  
At5g47950  
At5g47980  
At1g21310  
At5g19560  
At3g12540  
At1g16440  
At3g20370  
At5g17820  
At3g28550  
At4g34580  
At5g61550  
At2g42850  
At1g01750  
At2g44110  
At2g03720  
At2g34910  
At2g33790  
At1g52660  
At2g43880  
At1g48670  
At3g09240  
At5g04730  
At5g14340  
At2g39040  
At4g15290  
At3g18450  
At1g35330  
At1g53680  
At3g07900  
At1g63450  
At2g47540  
At4g16350  
At5g51310  
At5g66815  
At2g04680  
At1g33800  
At4g09990  
At5g23840  
At1g66800  
At5g42590  
At2g45890  
At1g13420  
At3g22570  
At4g30670  
At1g59940

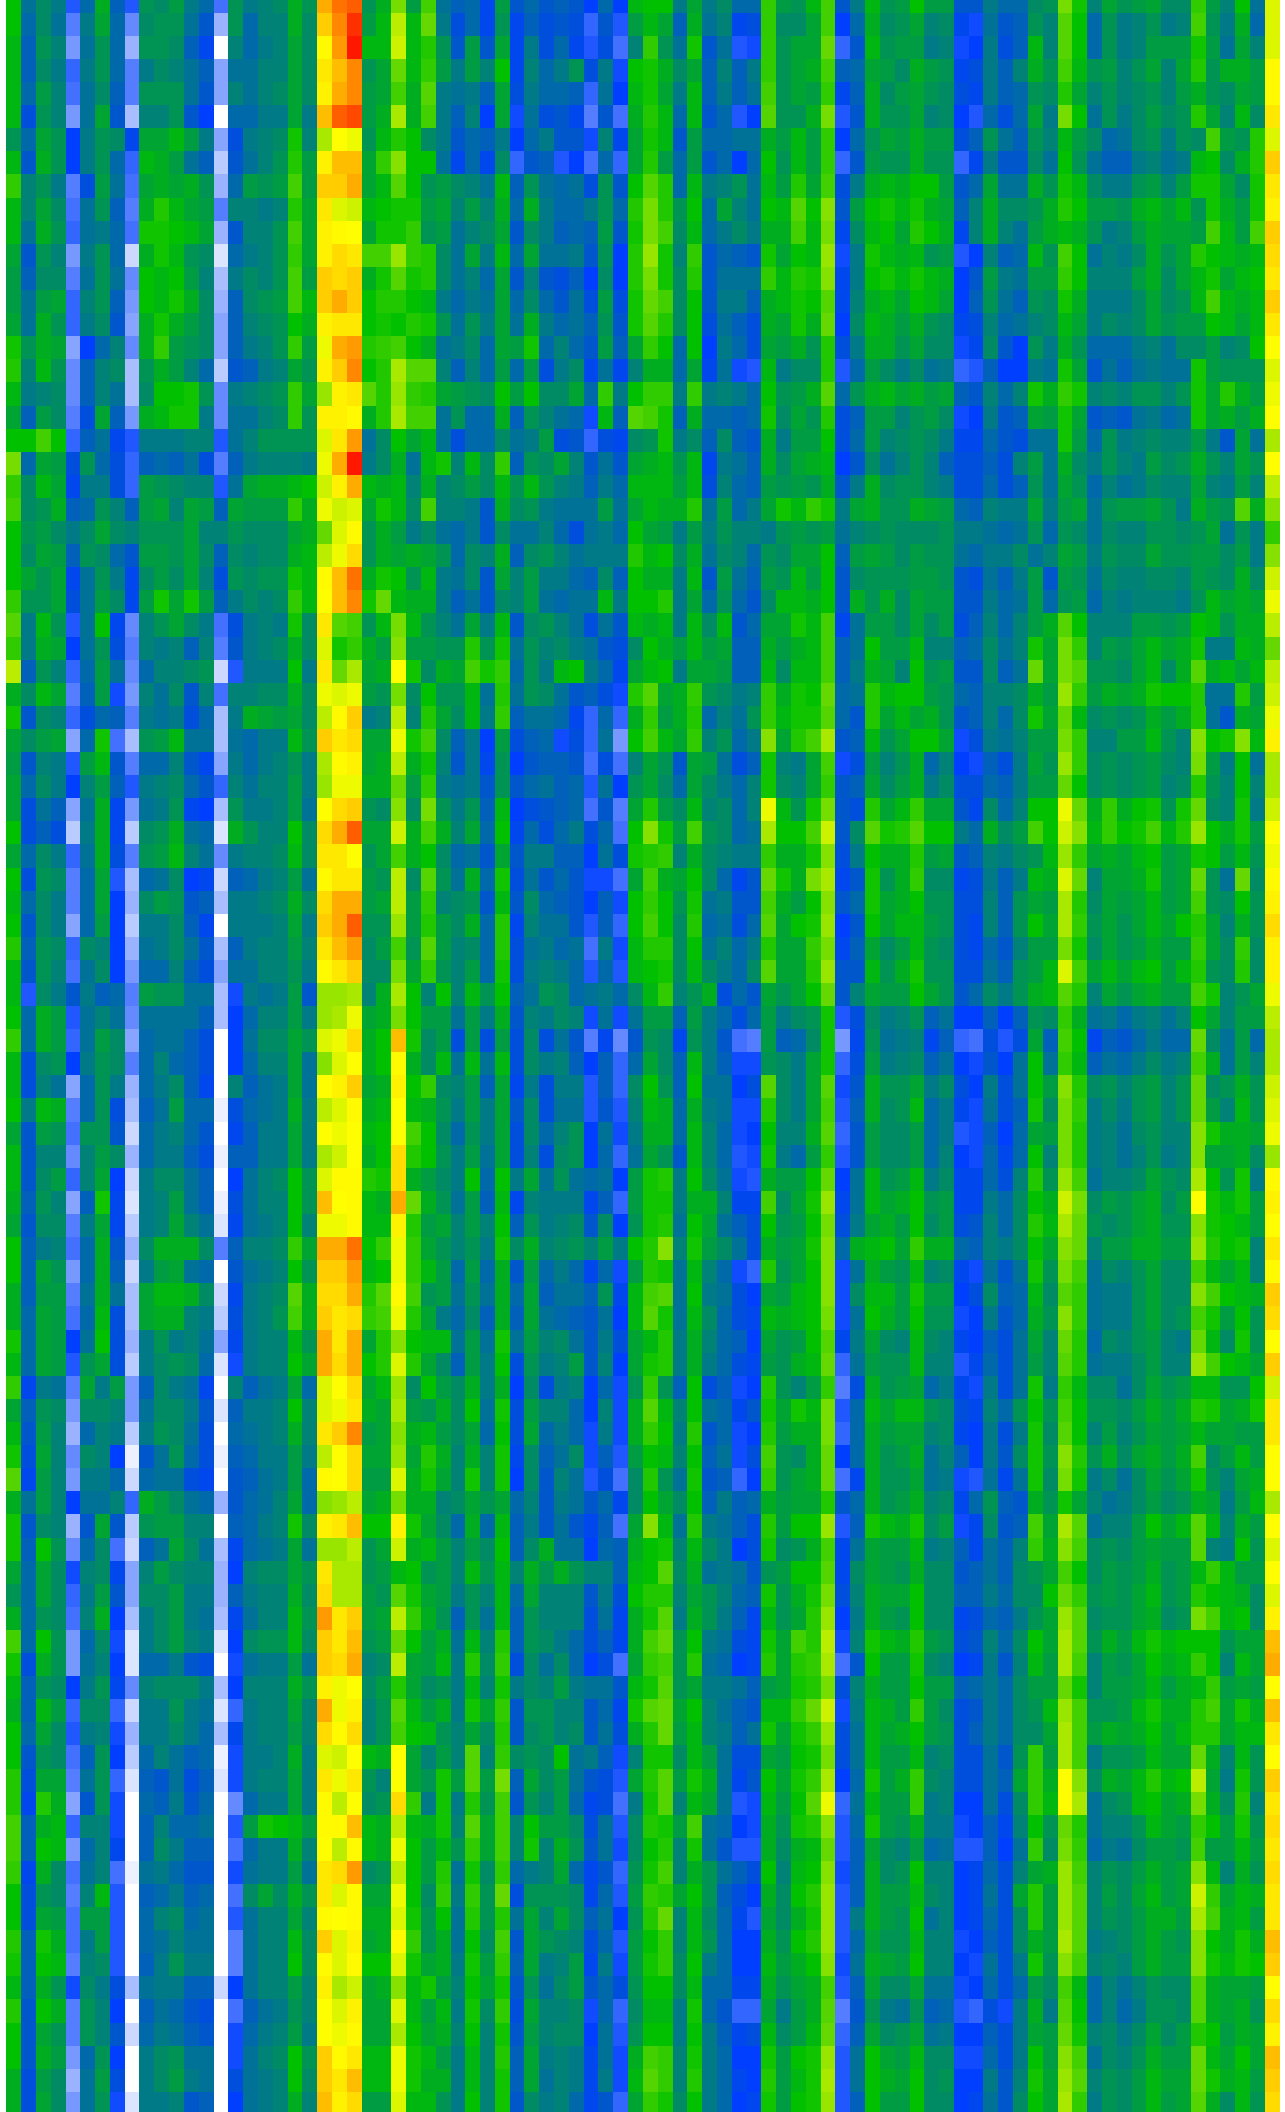

At1g13420  
At3g22570  
At4g30670  
At1g59940  
At2g32270  
At1g67330  
At3g06460  
At4g15500  
At3g24670  
At3g06990  
At2g23960  
At5g10280  
At3g26610  
At2g16970  
At4g15740  
At5g26010  
At2g29740  
At4g15230  
At1g08590  
At1g62320  
At1g50930  
At5g21130  
At2g42440  
At1g30140  
At1g49100  
At2g27440  
At3g47740  
At4g11780  
At3g58190  
At2g45400  
At3g61810  
At5g02270  
At5g42860  
At5g48000  
At5g48010  
At5g26260  
At5g65020  
At4g25250  
At2g22930  
At4g31470  
At3g54770  
At3g29250  
At3g45710  
At3g27270  
At4g12330  
At1g62660  
At2g01890  
At3g15950  
At2g22770  
At1g70850  
At3g16450  
At2g35585  
At1g77690  
At4g29270  
At1g07730  
At1g77330  
At1g43020  
At5g24100  
At1g53830  
At2g16980  
At3g09250  
At1g13670  
At5g64100  
At4g27860  
At3g16460  
At3g22620  
At3g05890  
At1g76790  
At5g24410  
At4g18510  
At4g26320  
At3g49840  
At3g25930  
At5g15180  
At3g59370  
At2g29750  
At4g17280  
At4g21340  
At5g66390  
At5g44610  
At5g44380  
At1g08990  
At4g23690  
At5g63590  
At1g47480  
At5g24290  
At4g15330  
At1g09740  
At2g01530  
At1g50570  
At4g21600  
At1g05260

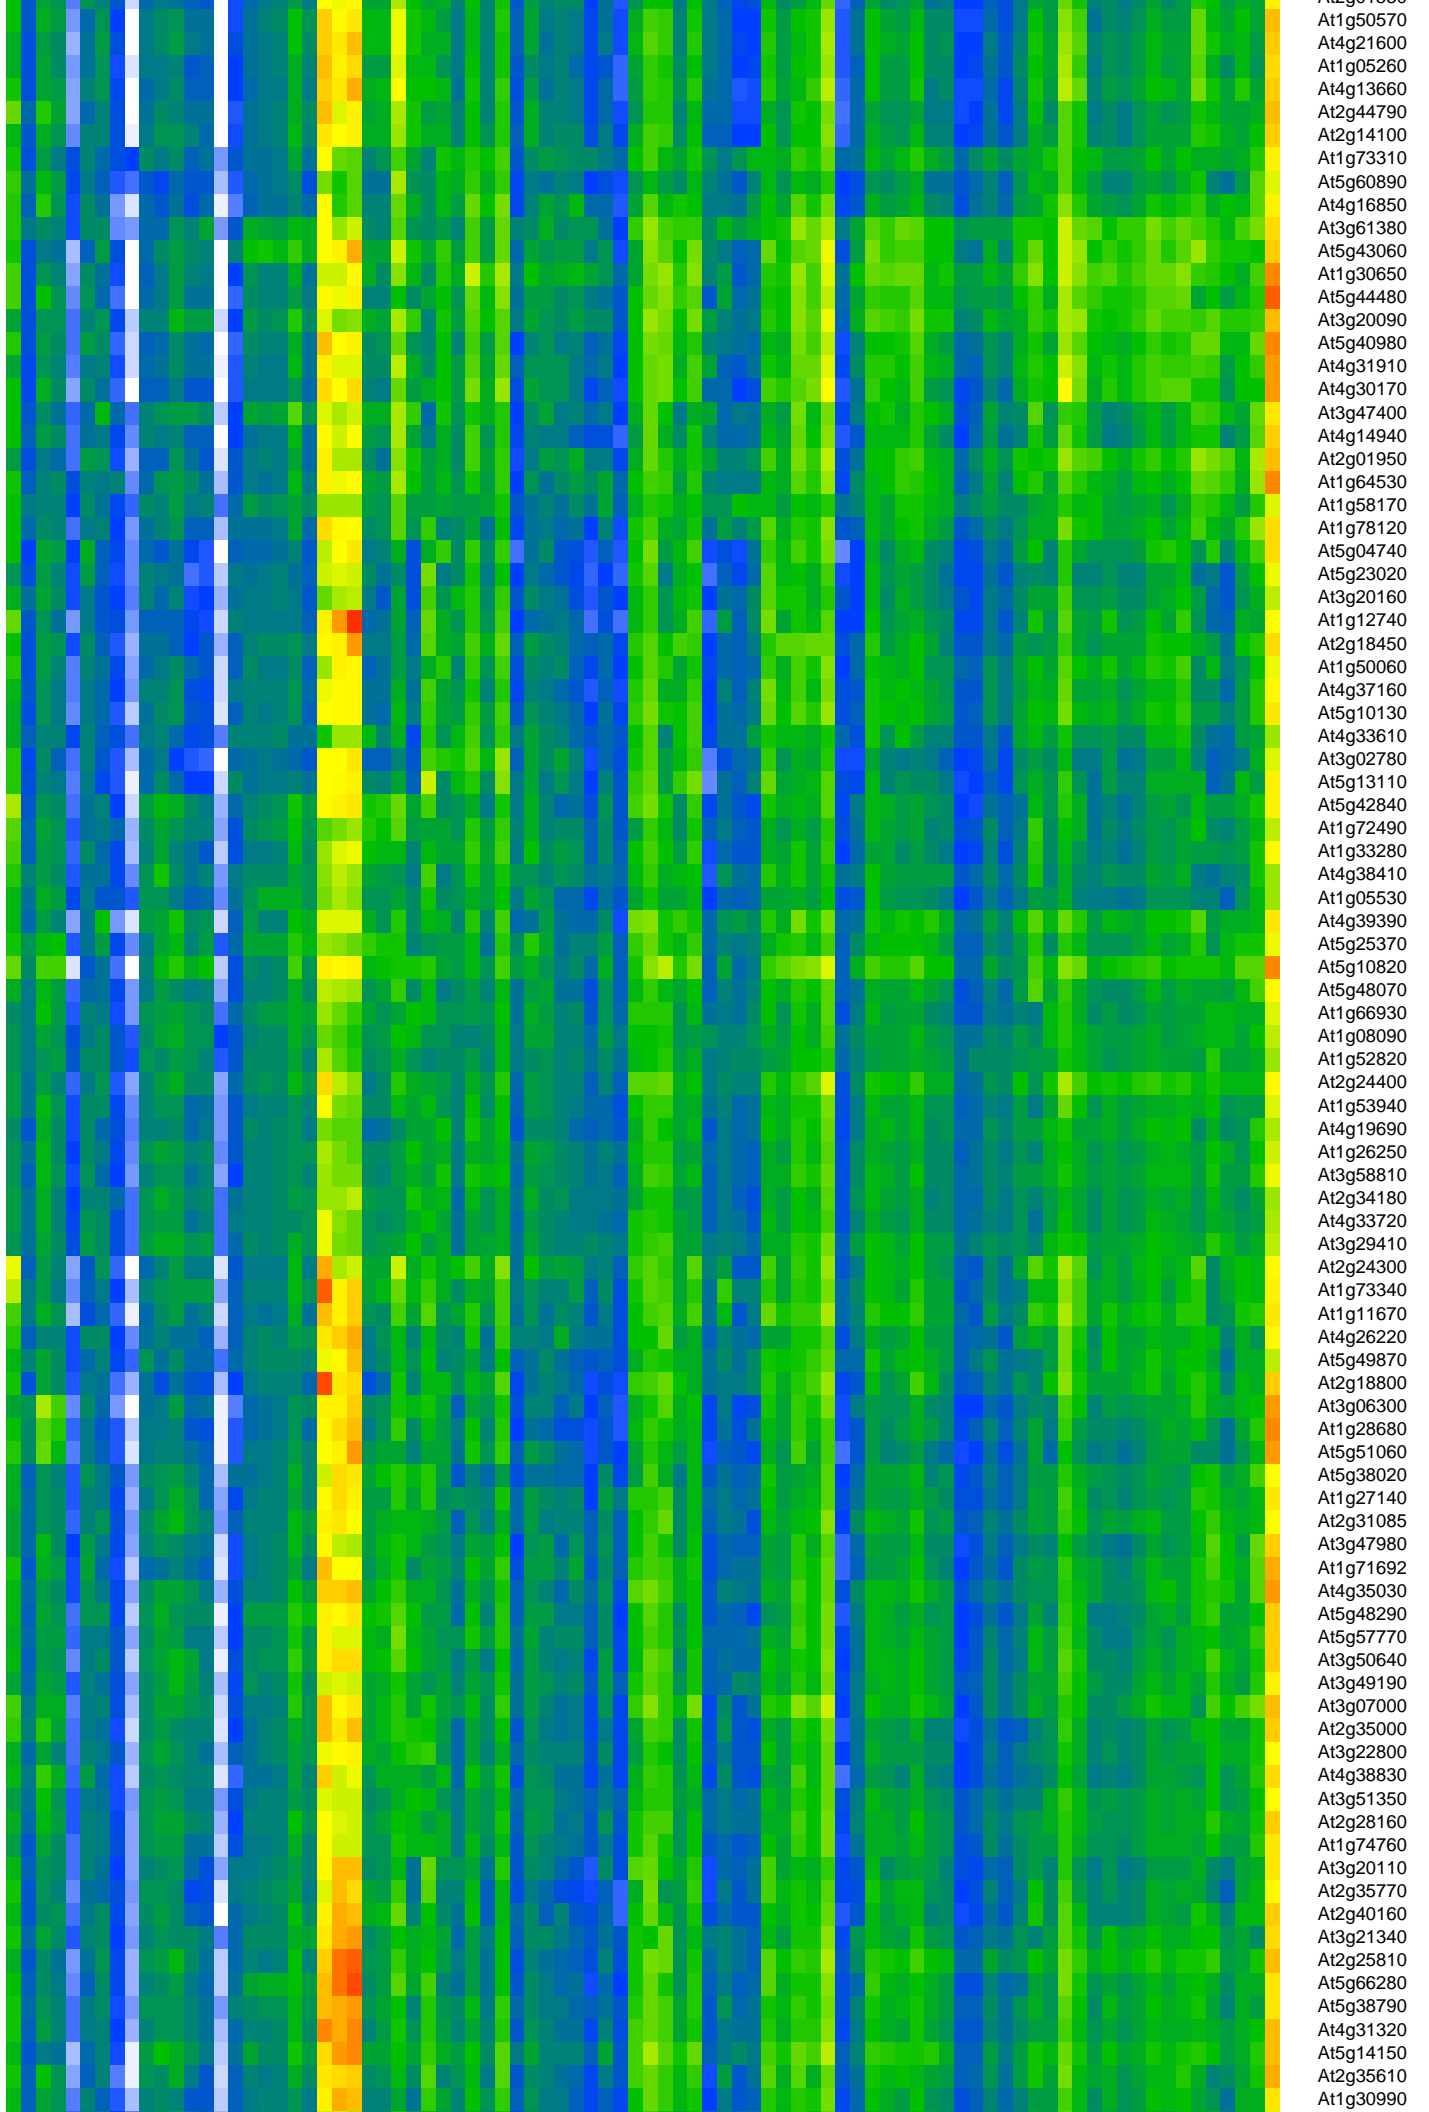





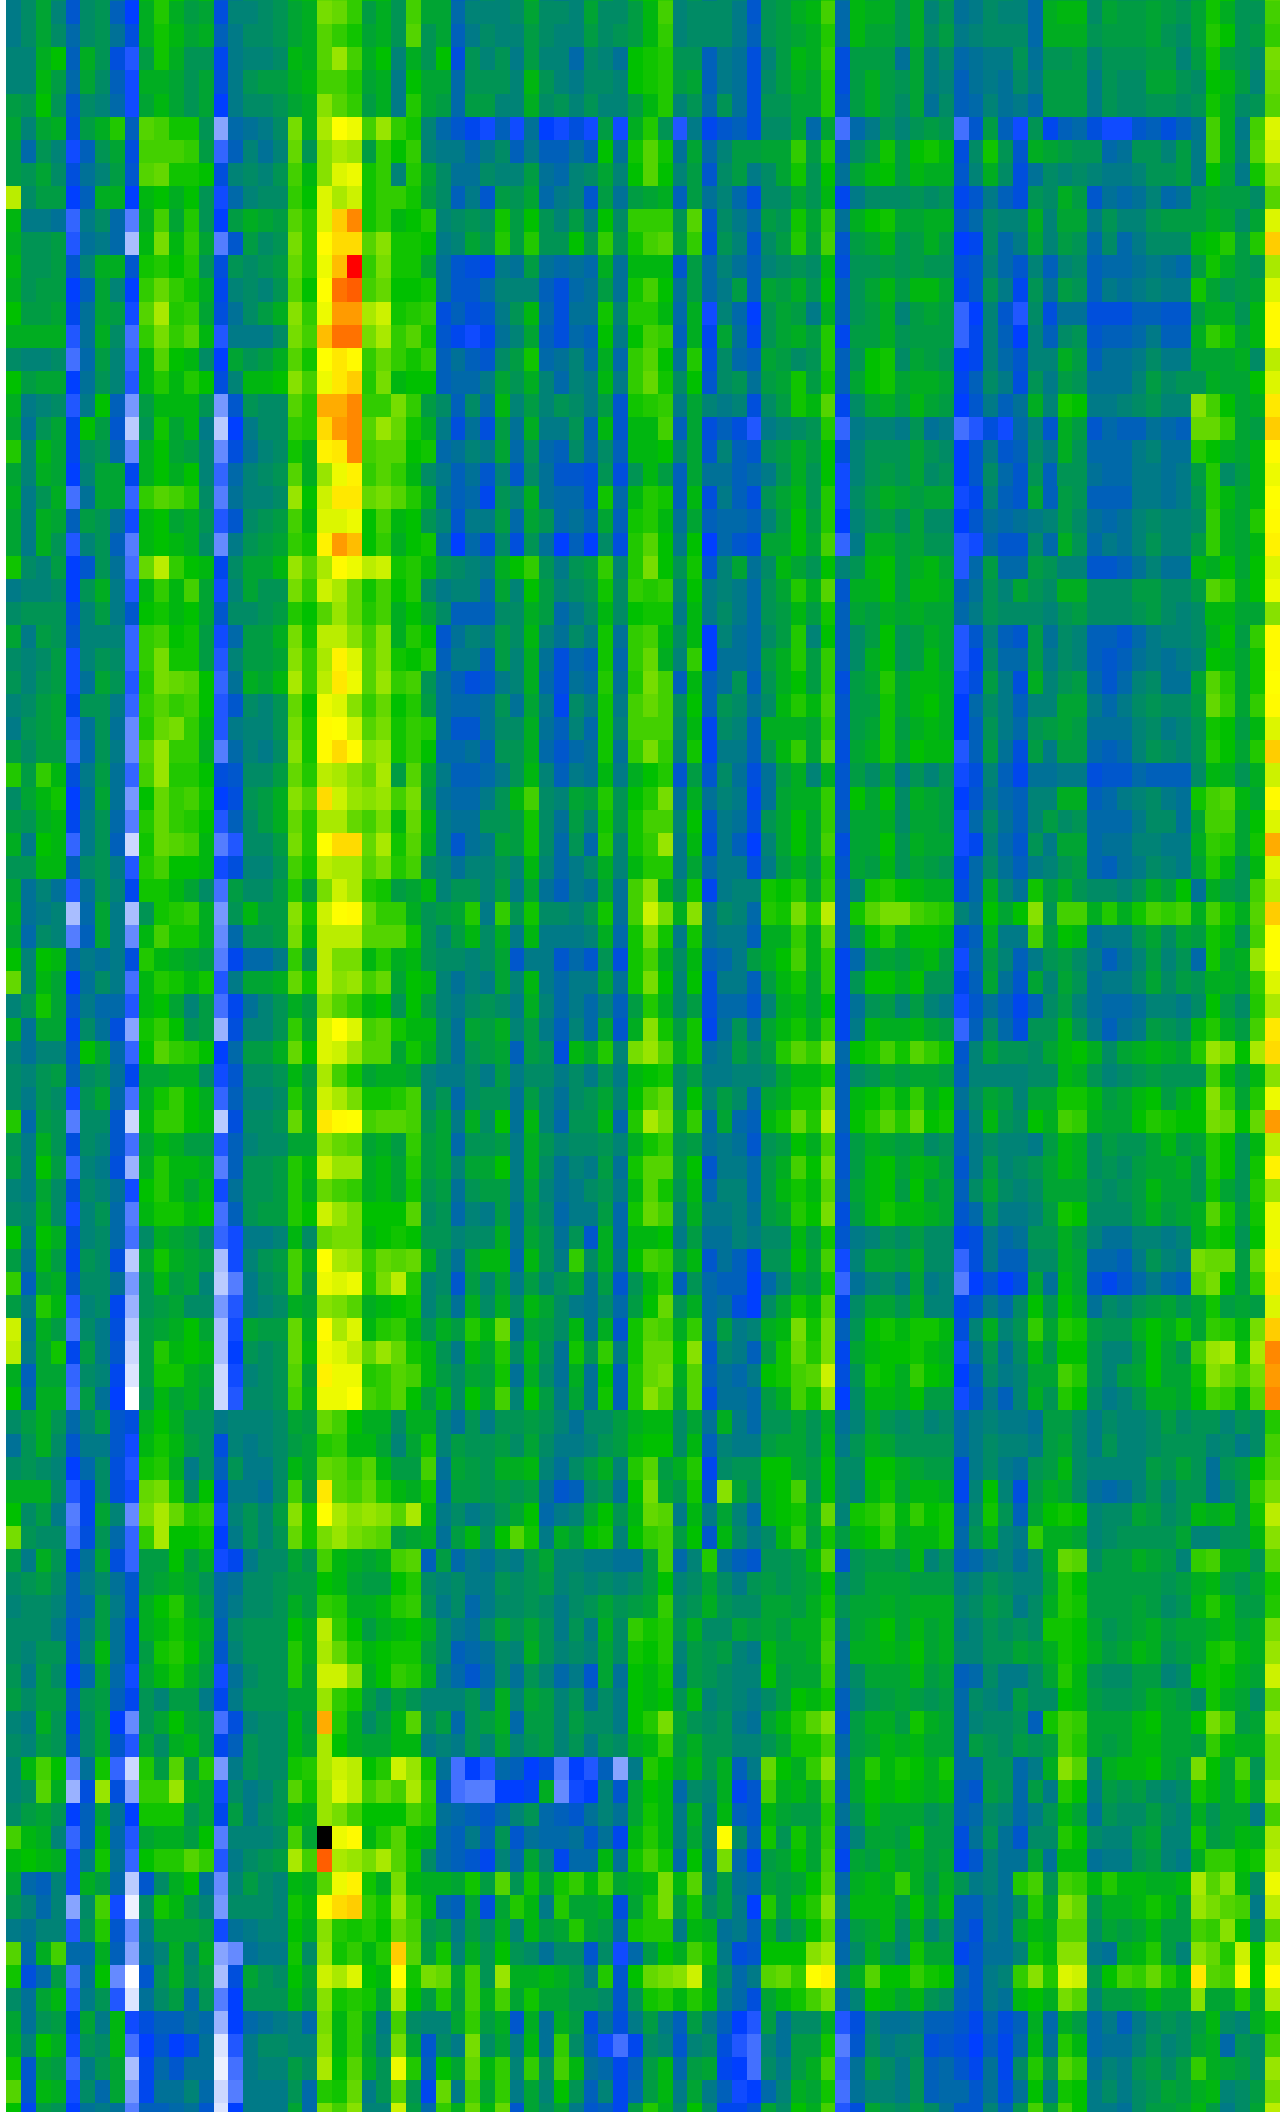

At1g33900  
At4g08380  
At1g48800  
At5g59270  
At3g53820  
At5g13910  
At5g58784  
At1g33890  
At5g46040  
At5g01280  
At4g16600  
At5g54790  
At1g54940  
At2g26420  
At1g48640  
At1g33320  
At3g47770  
At3g56230  
At1g13830  
At1g53340  
At1g64210  
At3g59110  
At4g03500  
At4g13440  
At4g14310  
At3g46400  
At5g43360  
At1g59780  
At2g32620  
At4g27400  
At1g24420  
At5g15725  
At4g25560  
At4g33020  
At5g52260  
At4g26560  
At1g72120  
At1g33870  
At4g01240  
At1g70950  
At1g04610  
At1g44030  
At3g61400  
At1g53640  
At2g19150  
At5g20640  
At2g42250  
At2g38600  
At2g21550  
At1g26240  
At1g49030  
At1g65680  
At1g11540  
At1g65570  
At1g66450  
At3g29630  
At4g09110  
At3g45530  
At3g49690  
At1g66440  
At4g21230  
At3g50160  
At1g06225  
At3g46800  
At4g00770  
At1g72850  
At3g49380  
At3g55790  
At1g08100  
At5g60770  
At2g43890  
At2g41810  
At2g19060  
At1g52790  
At3g29430  
At5g06900  
At1g30890  
At5g42420  
At2g29220  
At3g60550  
At2g04500  
At1g60960  
At3g11800  
At3g12820  
At1g52540  
At1g44170  
At4g00910  
At1g66180  
At4g38470  
At1g23870  
At5g43580  
At1g69520

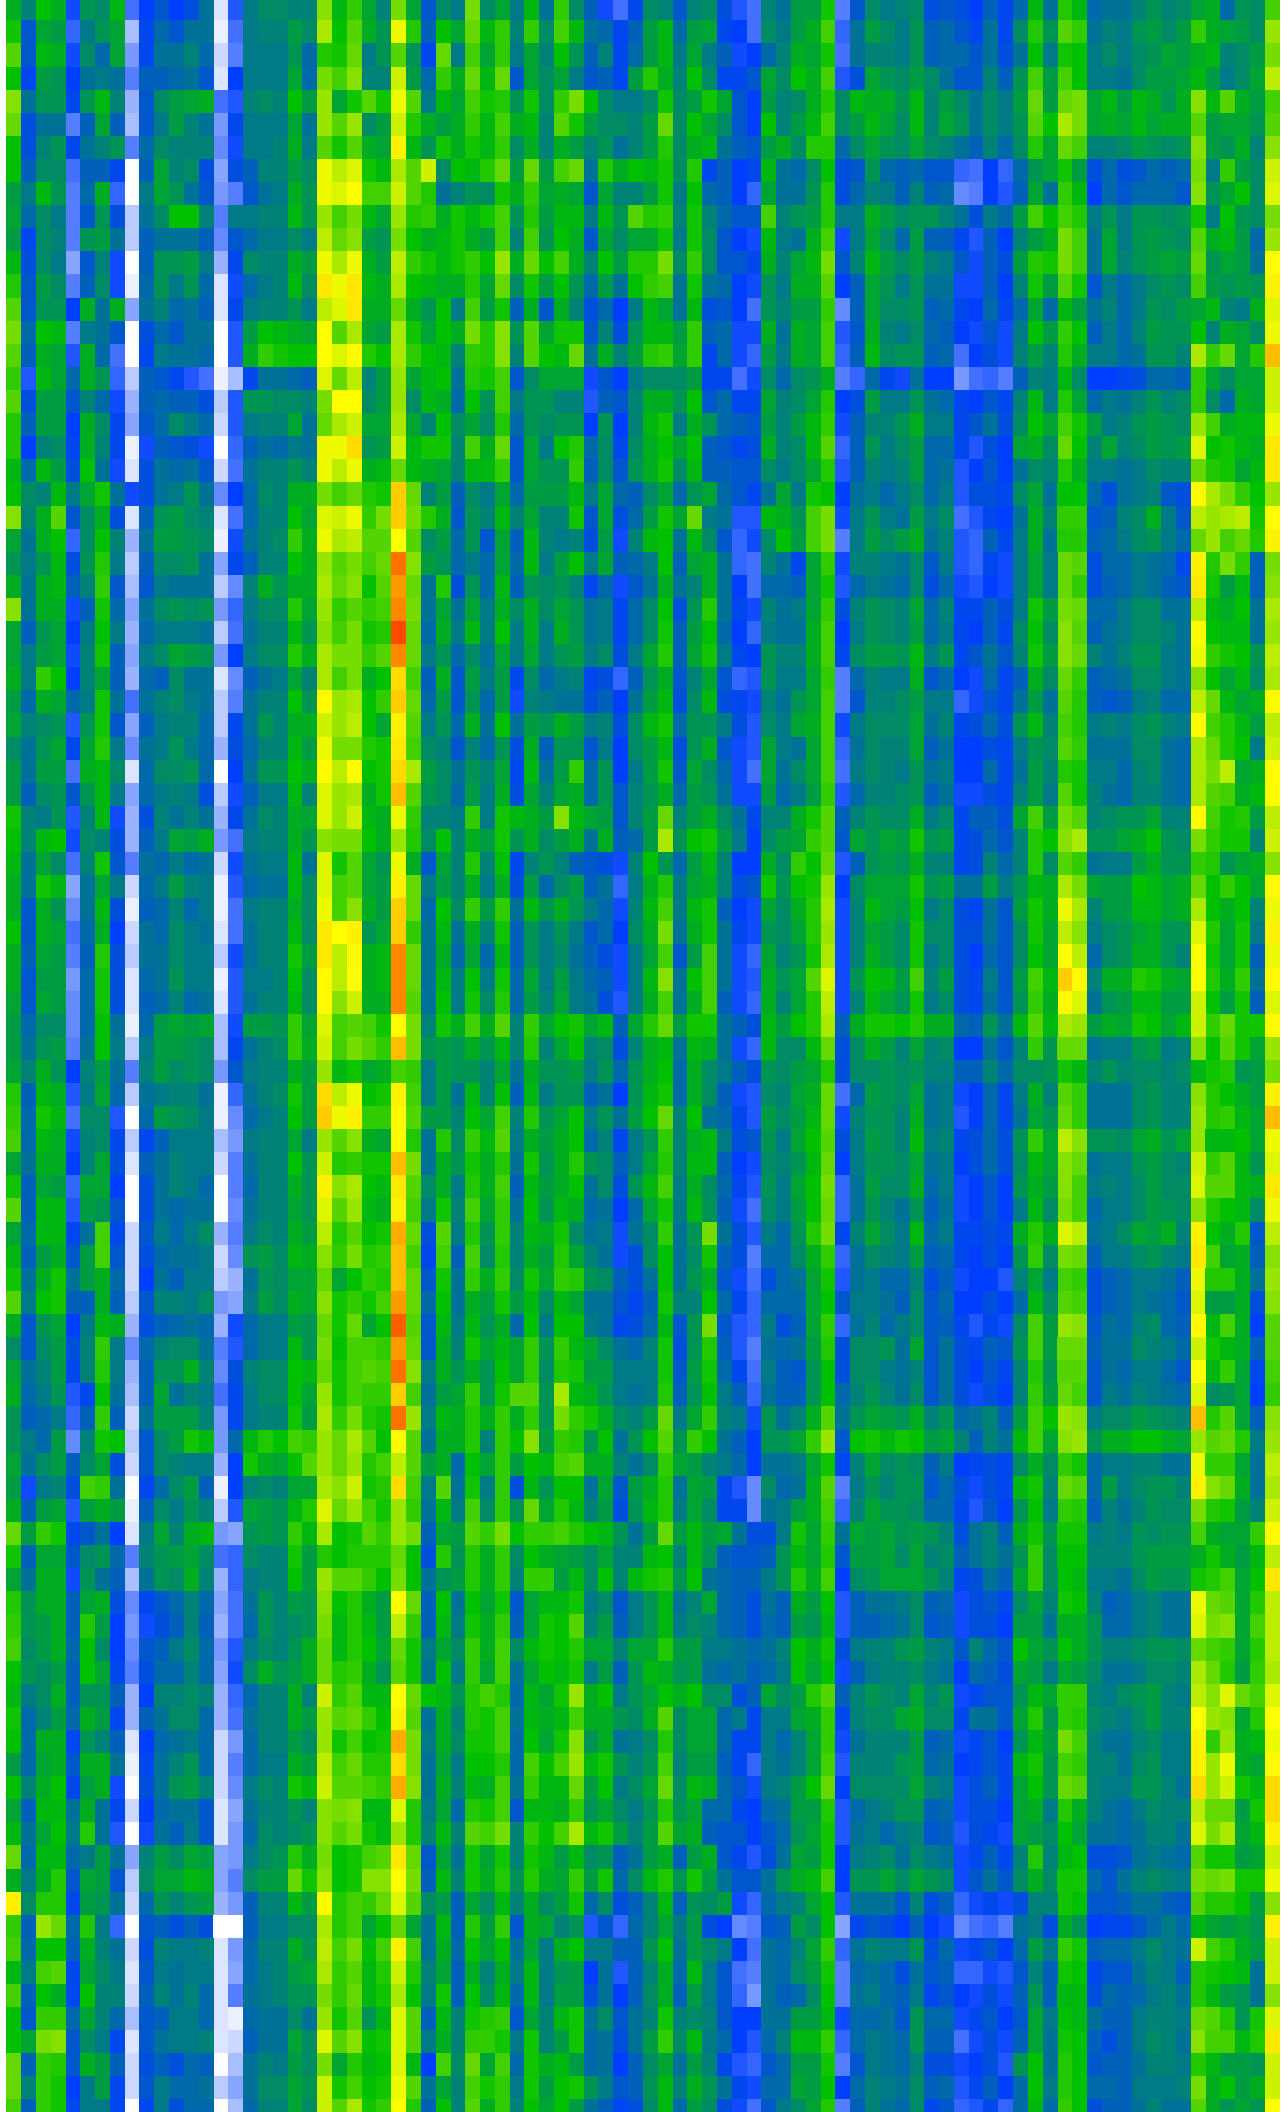

At4g38470  
At1g23870  
At5g43580  
At1g69526  
At4g27260  
At4g29140  
At5g11260  
At1g20900  
At3g01930  
At2g34020  
At1g22500  
At1g08320  
At4g20140  
At2g25090  
At2g17440  
At4g15093  
At1g77130  
At3g57010  
At1g14120  
At2g42490  
At4g13860  
At1g32100  
At1g50630  
At4g23410  
At2g37130  
At4g35060  
At1g55240  
At3g10910  
At1g14240  
At1g78660  
At1g10380  
At5g42190  
At5g15830  
At1g49240  
At5g10970  
At3g23090  
At1g21100  
At5g12940  
At1g35580  
At1g61590  
At4g02090  
At3g11550  
At4g13590  
At3g05920  
At1g09460  
At1g62770  
At4g07820  
At5g06800  
At3g58710  
At3g46700  
At5g44920  
At1g74660  
At2g37750  
At2g02300  
At2g40110  
At2g28110  
At4g32070  
At1g21360  
At4g33750  
At5g66170  
At4g36380  
At5g04470  
At5g26740  
At3g08040  
At1g56700  
At1g18270  
At5g07270  
At2g03360  
At5g28080  
At4g08160  
At5g40020  
At4g17220  
At5g01360  
At5g51670  
At5g16600  
At1g67030  
At1g74840  
At3g59690  
At2g40900  
At3g21710  
At4g24480  
At2g17430  
At1g65510  
At4g20110  
At1g32690  
At1g03850  
At1g73260  
At4g27320  
At2g30740  
At3g29035  
At3g20830  
At1g70300

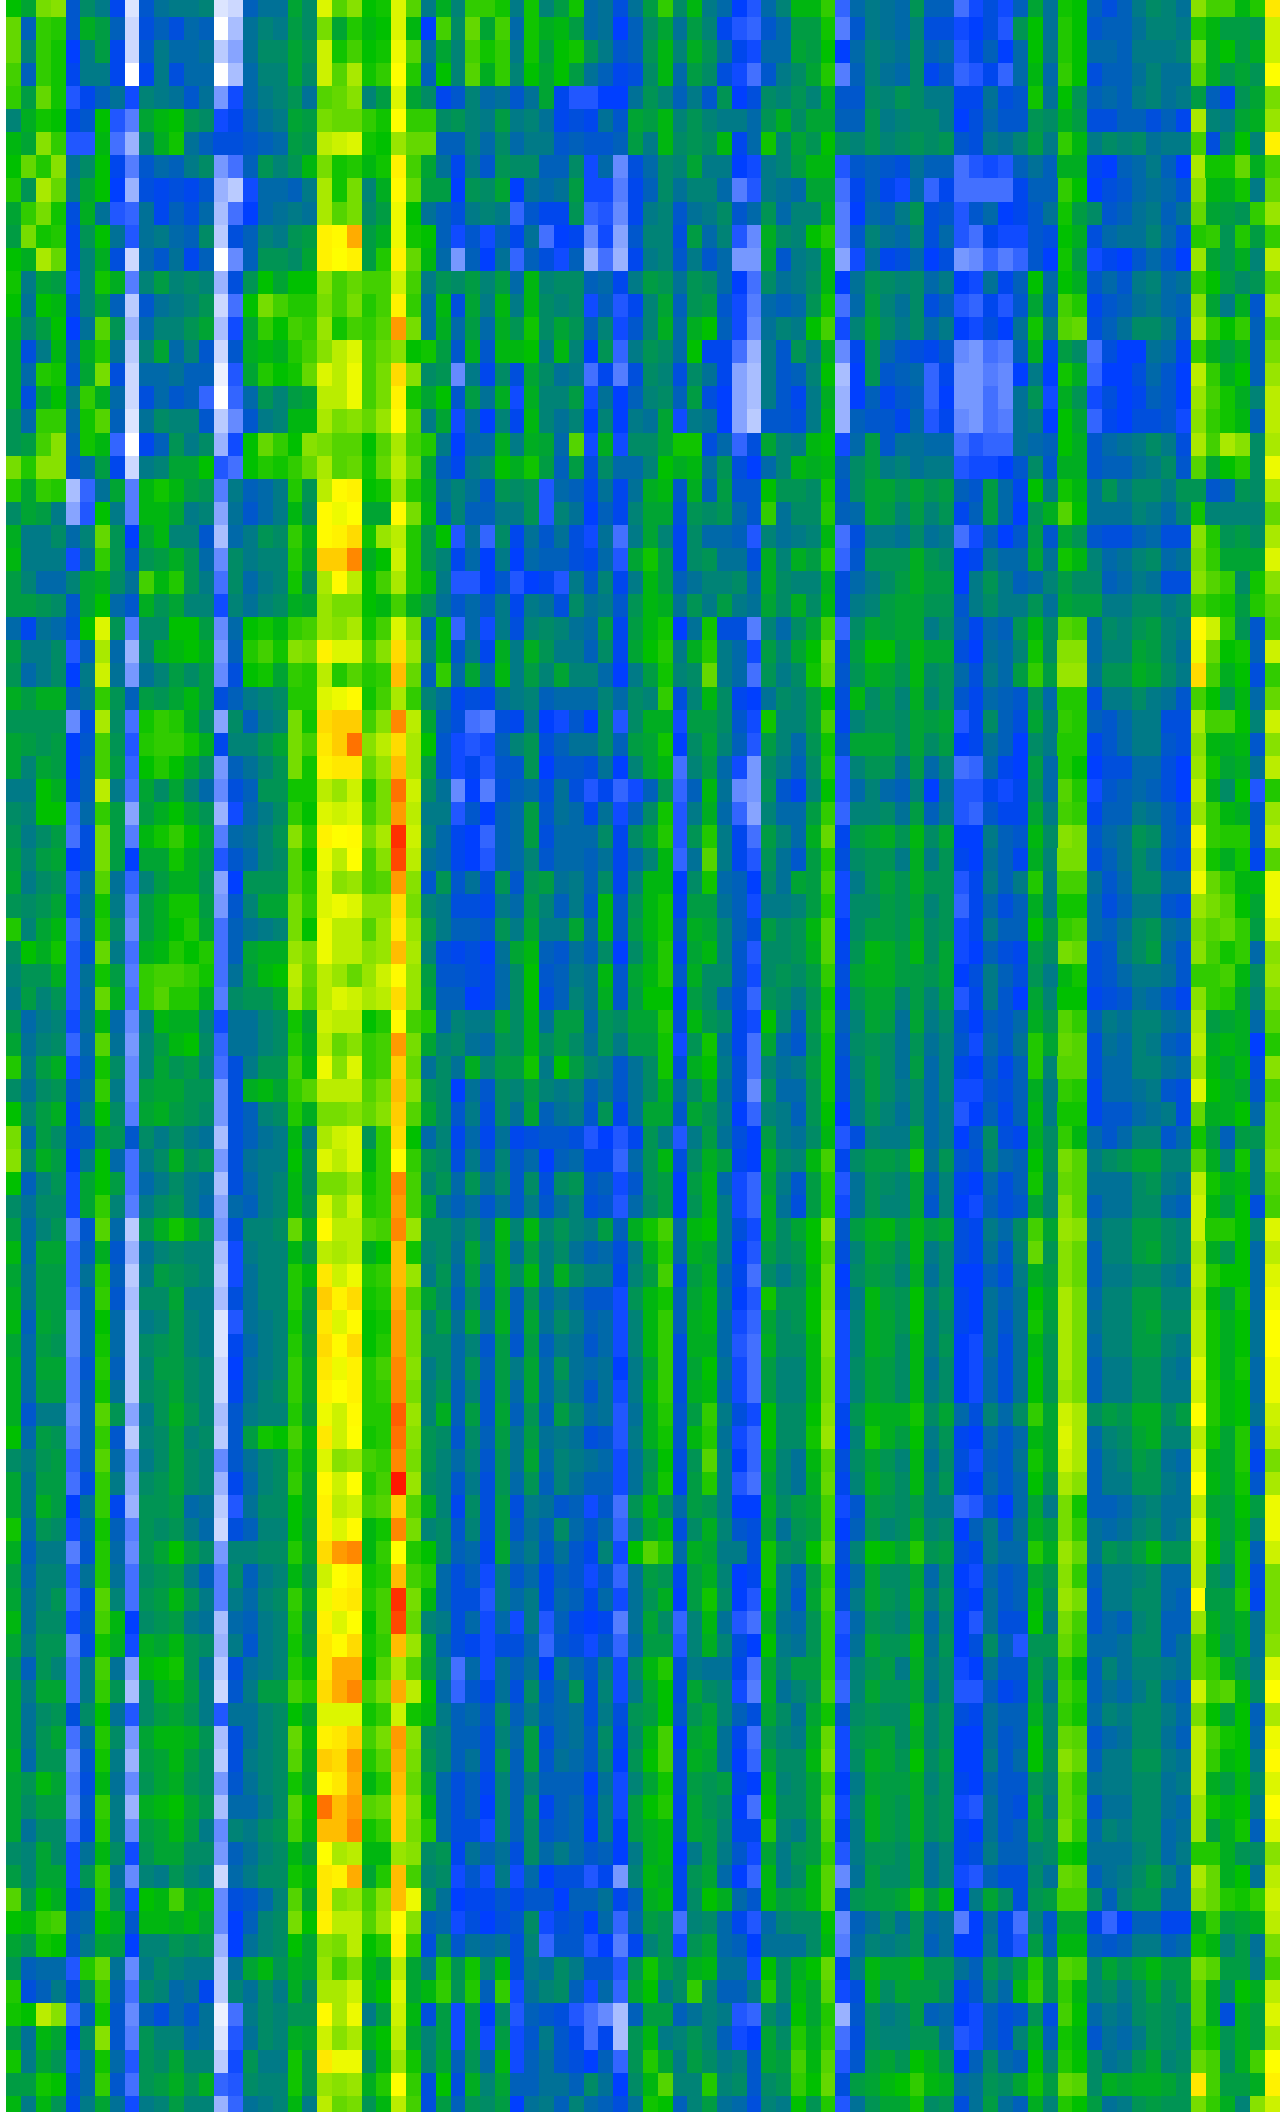

At2g30740  
At3g29035  
At3g20830  
At1g70300  
At5g40390  
At3g03550  
At4g30160  
At3g27960  
At4g36750  
At1g06640  
At3g05490  
At1g79340  
At4g28720  
At2g17500  
At1g32170  
At4g02050  
At4g28770  
At3g01460  
At1g56010  
At3g46060  
At5g14310  
At1g74790  
At1g76090  
At5g38600  
At2g38320  
At2g44300  
At5g38770  
At4g29260  
At3g63470  
At1g12080  
At2g03370  
At5g07110  
At3g48940  
At4g05170  
At1g70330  
At3g13700  
At5g06200  
At4g22460  
At5g03260  
At5g19870  
At4g25410  
At4g01140  
At2g37740  
At1g11740  
At2g18620  
At1g08500  
At1g76220  
At4g40010  
At5g03550  
At1g58270  
At2g38760  
At2g39310  
At2g43535  
At3g20130  
At5g23220  
At1g72200  
At3g18200  
At2g28670  
At2g36100  
At2g27370  
At1g30750  
At1g30130  
At5g53250  
At2g20080  
At2g32300  
At5g57070  
At5g61340  
At1g17190  
At5g47990  
At2g25160  
At1g04250  
At3g16690  
At3g07570  
At3g56930  
At5g42580  
At1g71740  
At2g39430  
At5g25810  
At1g70990  
At3g45700  
At5g07080  
At2g19760  
At3g06370  
At3g56000  
At1g64200  
At2g14900  
At3g44200  
At2g36310  
At2g48030  
At5g03510  
At4g38620  
At3g47180

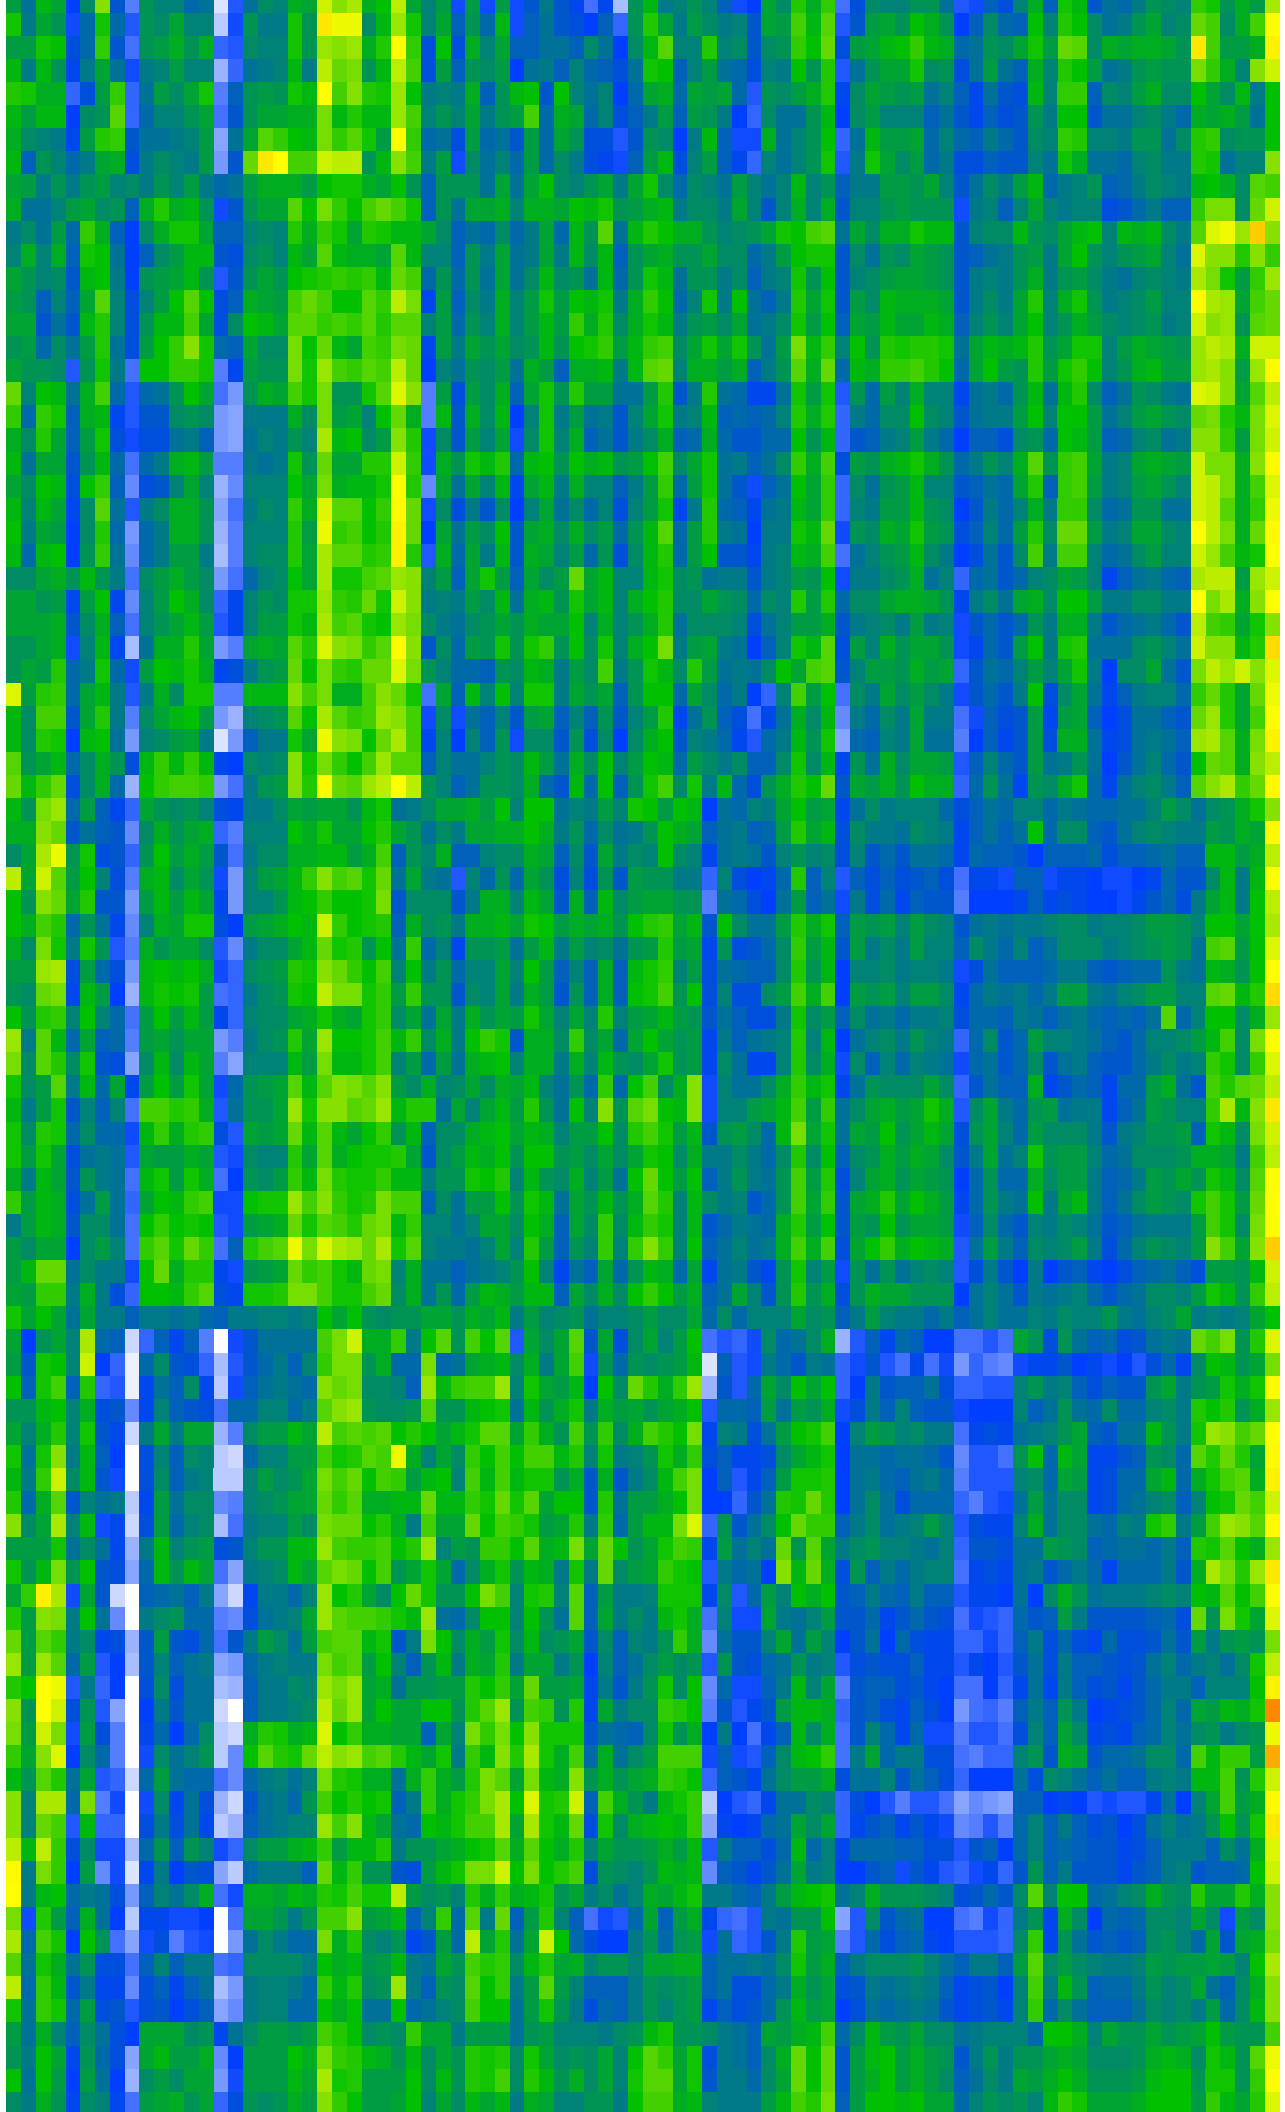

At2g48030  
At5g03510  
At4g38620  
At3g47180  
At5g41080  
At1g15040  
At1g11380  
At3g52360  
At1g55180  
At3g48030  
At4g39320  
At4g23496  
At5g60720  
At5g12870  
At5g48740  
At4g37445  
At1g77700  
At5g56720  
At3g20570  
At3g07420  
At1g05760  
At1g29520  
At5g18970  
At1g68230  
At3g51710  
At2g31900  
At3g08490  
At5g67090  
At1g71930  
At3g13590  
At3g18260  
At4g35970  
At5g20870  
At2g28460  
At1g61390  
At2g30400  
At2g28710  
At3g14470  
At1g21390  
At3g53770  
At3g62780  
At3g45330  
At4g30640  
At2g23830  
At1g58410  
At1g55780  
At1g71200  
At5g38340  
At1g55700  
At5g17260  
At2g05180  
At3g03200  
At1g07550  
At5g27100  
At3g61390  
At1g33880  
At2g38510  
At1g28580  
At1g66240  
At5g20400  
At2g40330  
At3g04530  
At4g23450  
At3g04060  
At5g17630  
At5g18270  
At4g36000  
At1g68795  
At2g20770  
At5g43100  
At1g77380  
At4g19810  
At2g35910  
At4g39270  
At5g08240  
At5g41980  
At4g15270  
At4g38540  
At4g19880  
At1g53980  
At4g13180  
At5g11110  
At3g22200  
At3g53990  
At1g60470  
At1g62570  
At3g16800  
At5g52350  
At4g15360  
At1g50050  
At5g37450

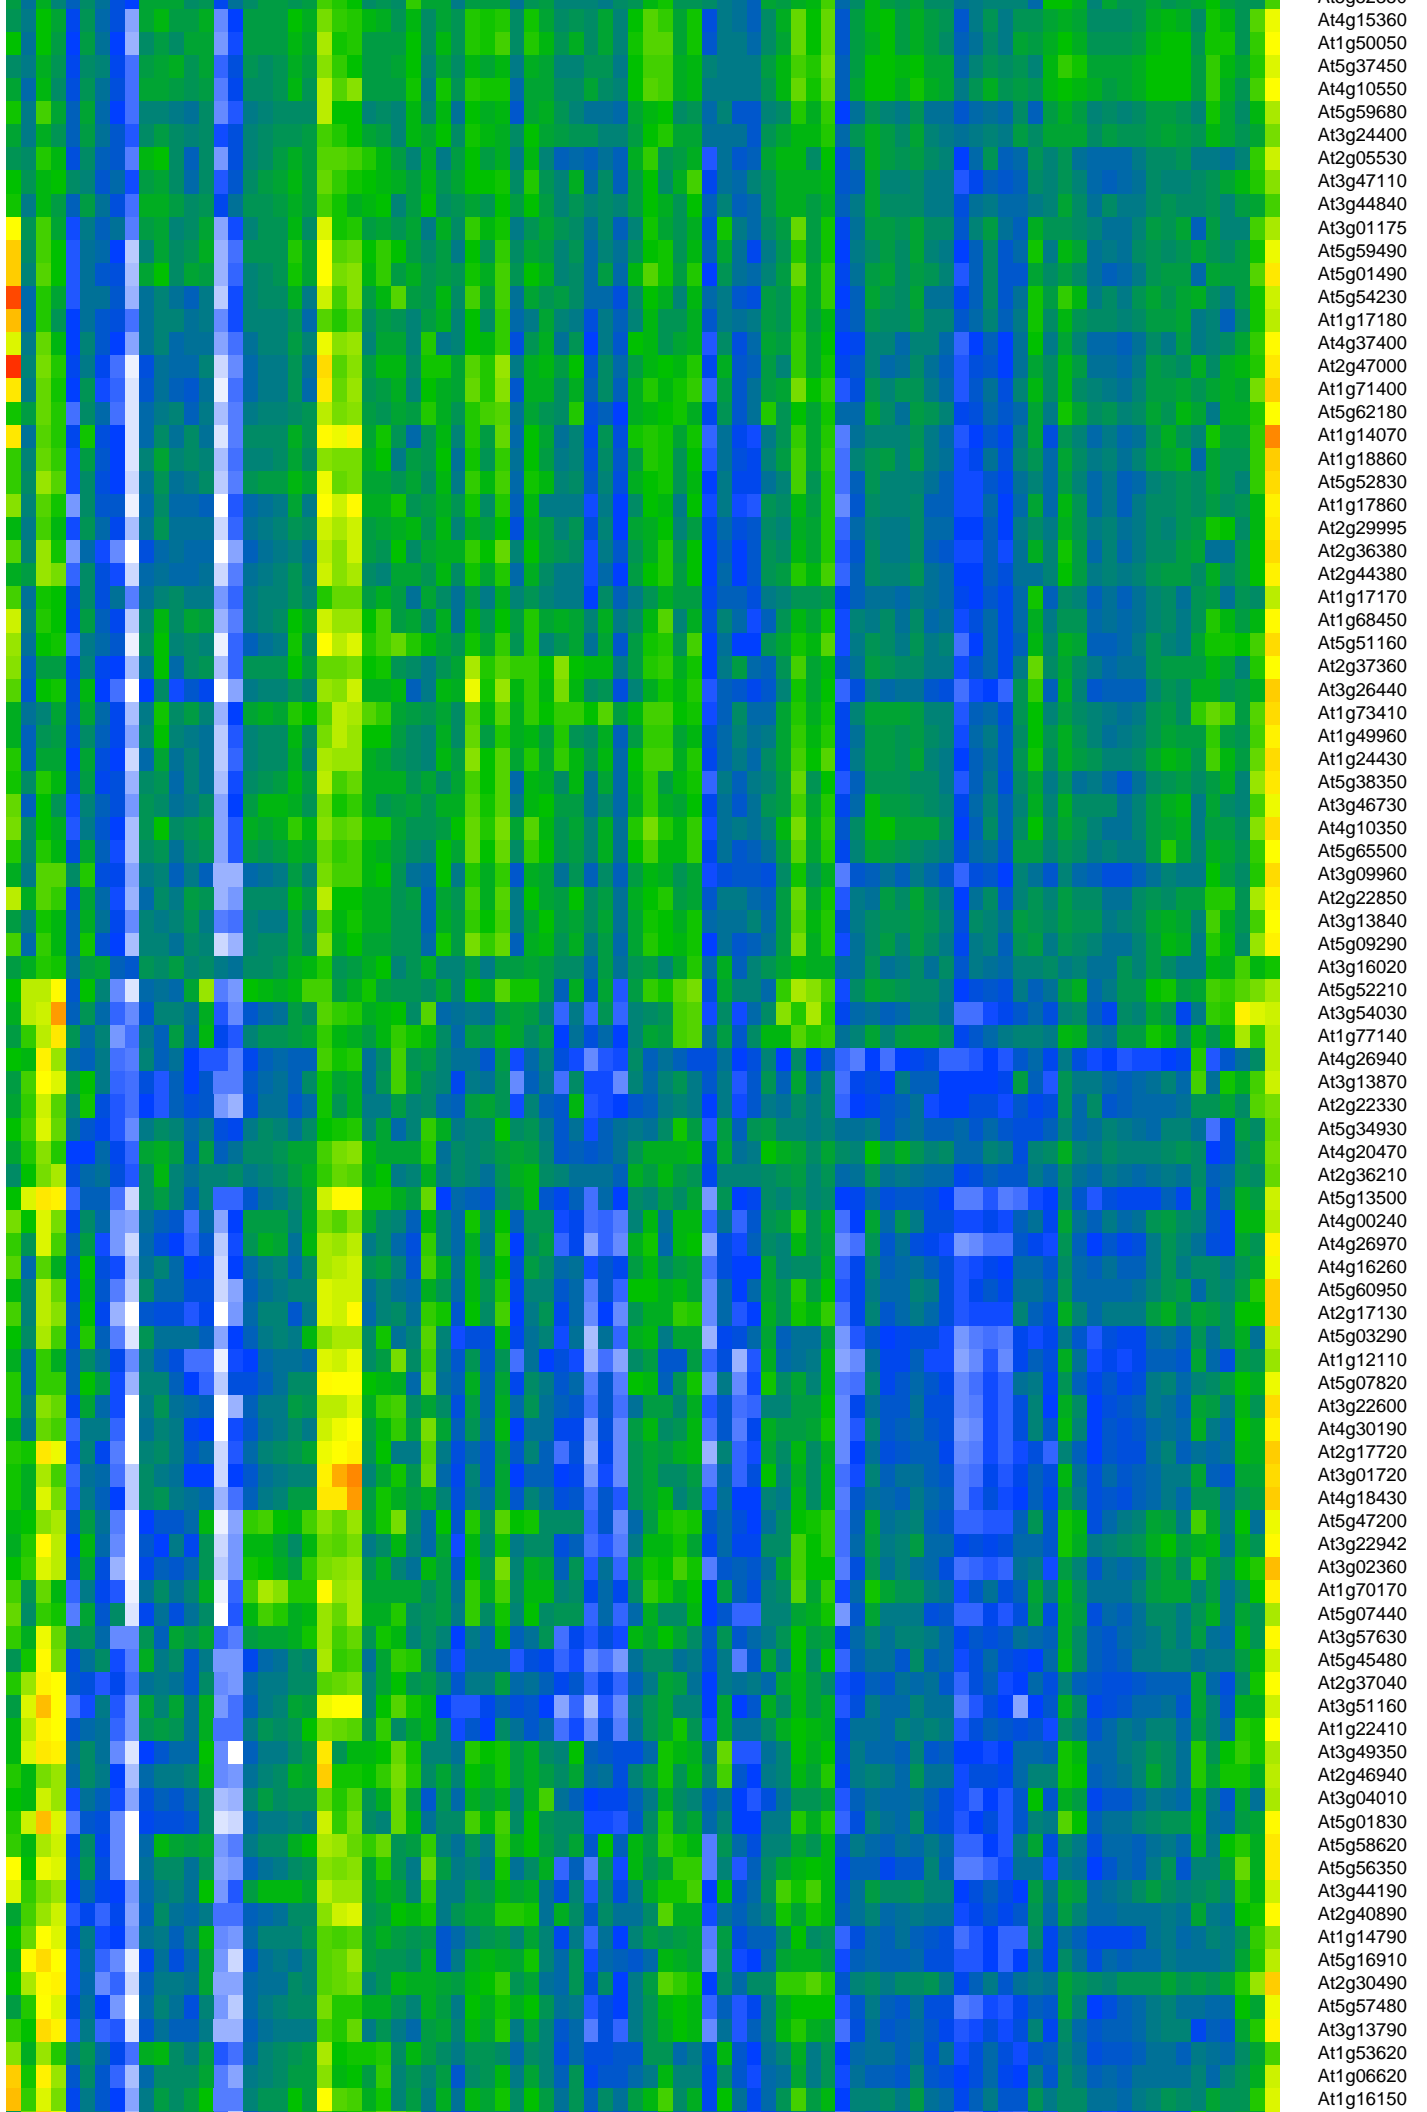

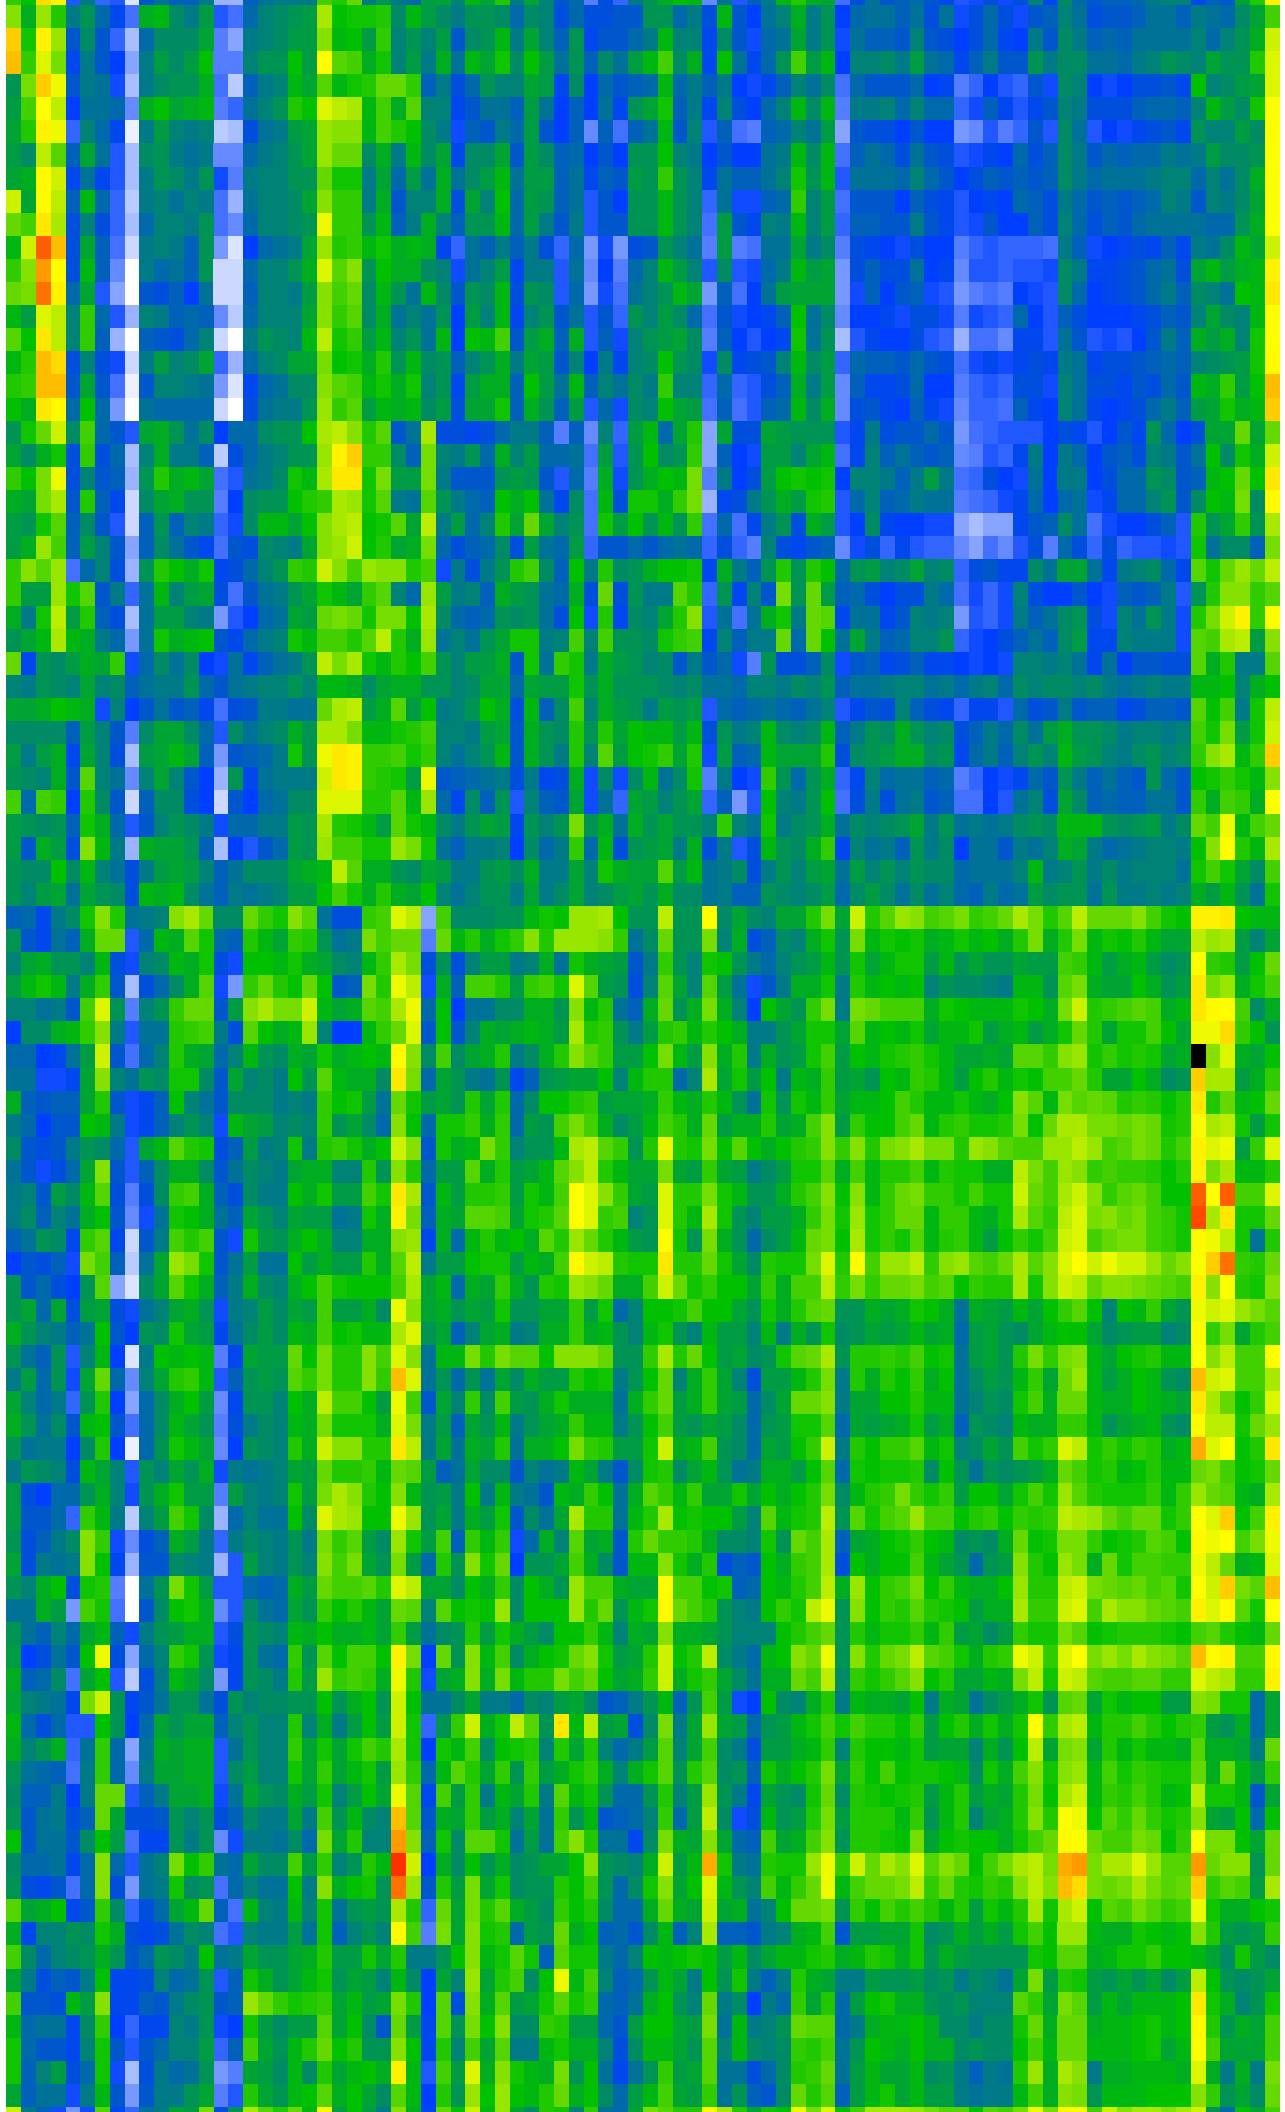

At1g53620  
At1g06620  
At1g16150  
At5g57150  
At5g24230  
At1g09560  
At3g51330  
At2g39530  
At5g60280  
At3g09940  
At4g23470  
At3g20510  
At5g03630  
At1g30900  
At1g21380  
At5g53110  
At2g28890  
At3g09490  
At1g23140  
At1g05000  
At1g65610  
At5g25940  
At3g02910  
At5g01210  
At4g27970  
At1g33560  
At4g02860  
At3g11150  
At4g17080  
At5g05890  
At3g27170  
At1g67110  
At4g03610  
At5g03545  
At2g40940  
At3g48100  
At2g26240  
At1g51990  
At1g55060  
At5g47310  
At1g55510  
At4g36830  
At5g66050  
At3g02700  
At3g55140  
At3g50630  
At3g55420  
At2g47160  
At1g62480  
At4g25760  
At1g14380  
At2g01910  
At4g08150  
At5g25760  
At5g05950  
At2g30710  
At1g69080  
At2g34410  
At4g03340  
At1g73640  
At1g72230  
At2g40120  
At5g20885  
At1g47655  
At3g29770  
At3g11770  
At3g14410  
At1g26960  
At5g55500  
At5g52240  
At5g58500  
At3g23690  
At5g03530  
At1g36940  
At3g60220  
At5g22500  
At5g63650  
At3g06850  
At2g26710  
At3g17440  
At1g14360  
At3g26720  
At1g03590  
At4g19160  
At2g23290  
At3g27200  
At3g12560  
At2g27740  
At1g24030  
At1g04220  
At1g76250

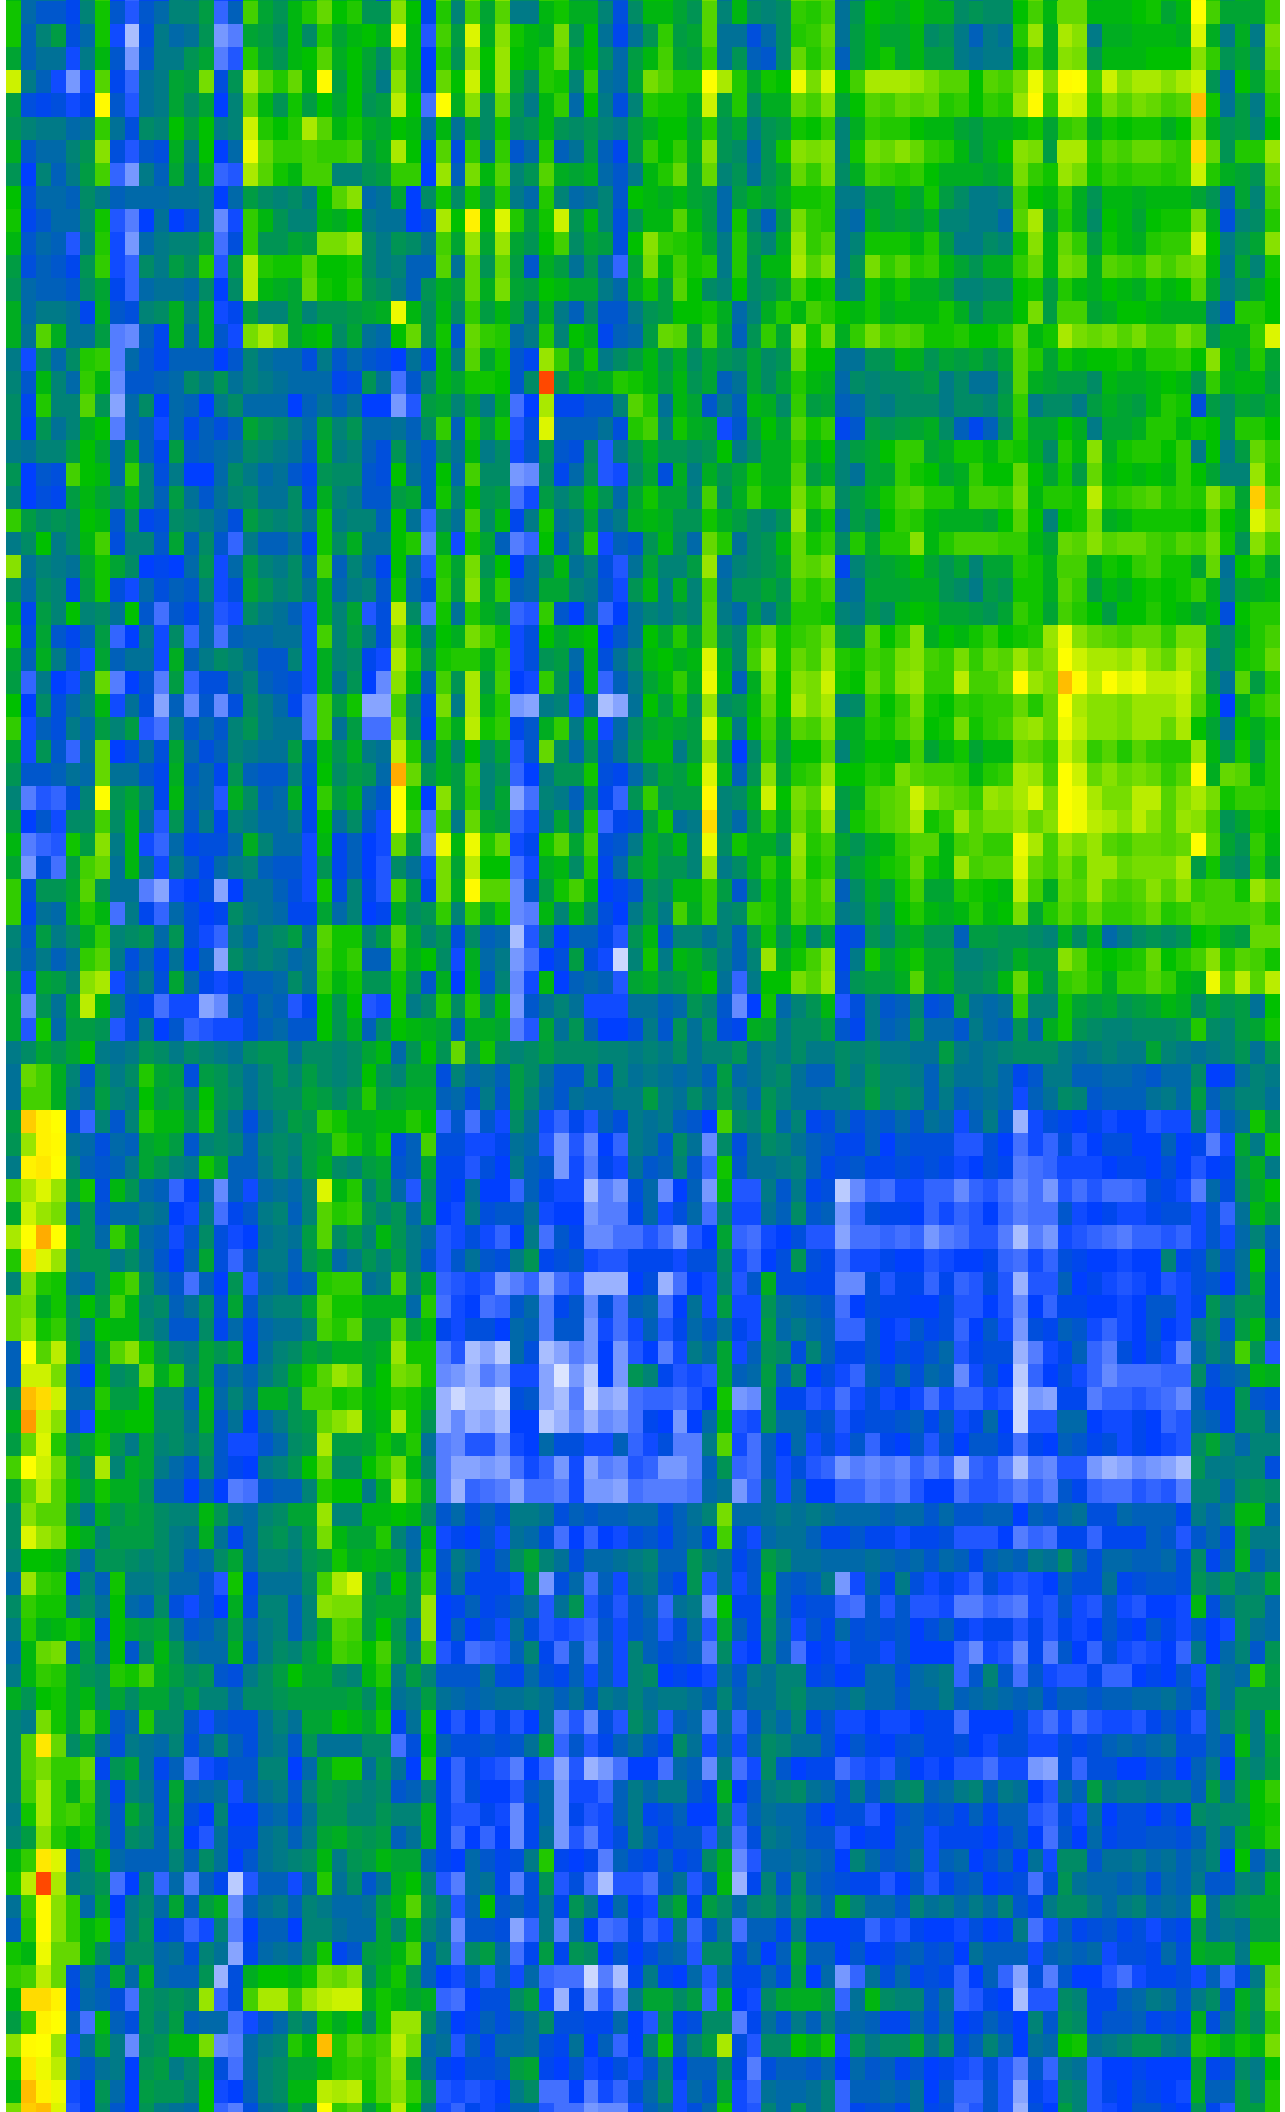

At1g24030  
At1g04220  
At1g76250  
At5g66310  
At2g41550  
At1g61130  
At5g35180  
At1g68710  
At2g23910  
At4g24130  
At2g16760  
At4g30500  
At2g39510  
At1g78610  
At1g03060  
At3g02630  
At2g21660  
At2g16600  
At4g36940  
At3g03190  
At4g14760  
At4g24780  
At2g46630  
At1g10350  
At4g17460  
At3g20470  
At3g19340  
At1g21730  
At5g42620  
At3g08550  
At5g22400  
At5g58550  
At5g65310  
At2g20190  
At5g50000  
At5g35750  
At5g47820  
At3g06440  
At3g47000  
At2g20790  
At5g49960  
At5g13710  
At3g19400  
At1g75130  
At5g37830  
At1g17615  
At1g27640  
At2g31850  
At4g39840  
At5g44390  
At4g02330  
At1g25550  
At5g24030  
At1g68840  
At1g72790  
At3g28200  
At1g21910  
At1g61100  
At5g44130  
At3g02350  
At4g00300  
At4g26690  
At1g03730  
At3g28180  
At5g66200  
At1g15580  
At5g09470  
At2g37140  
At2g38310  
At1g24530  
At3g47420  
At4g12470  
At2g04480  
At4g05030  
At1g13750  
At5g27380  
At3g13110  
At2g46650  
At2g20610  
At1g18590  
At2g18350  
At4g35310  
At1g71820  
At2g13560  
At5g45270  
At2g47730  
At2g41110  
At3g46290  
At1g67060  
At4g05100  
At1g16370  
At5g45280



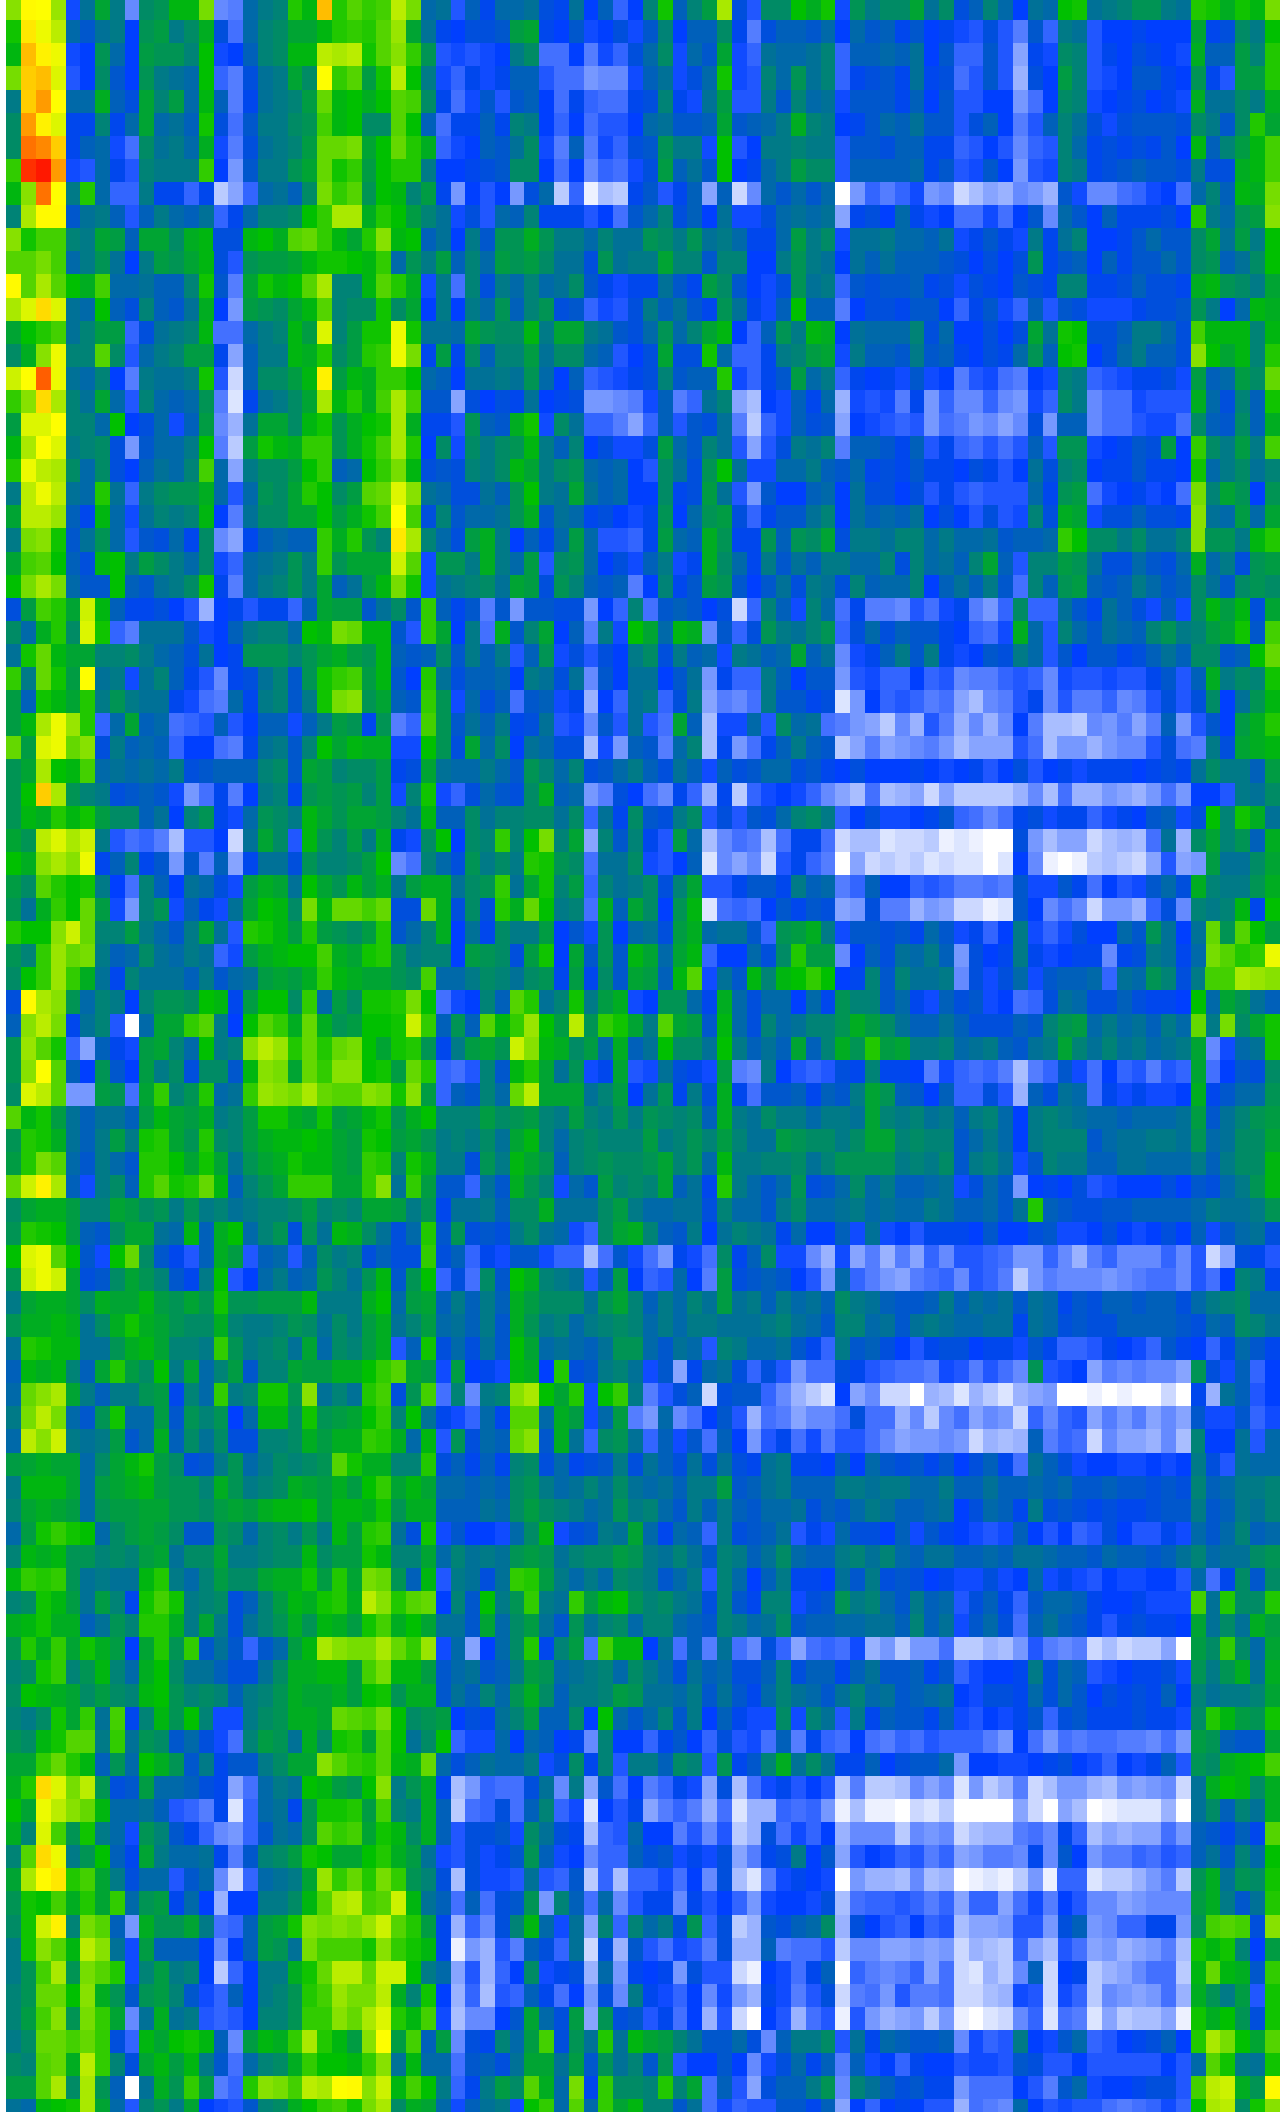

At1g67060  
At4g05100  
At1g16370  
At5g45280  
At5g11000  
At1g74380  
At3g52470  
At3g02880  
At2g30870  
At5g54160  
At4g08250  
At5g59510  
At5g44060  
At1g10560  
At5g66650  
At5g64410  
At3g55950  
At1g17340  
At4g29950  
At2g30360  
At1g61890  
At4g23030  
At5g63450  
At2g25430  
At1g09250  
At1g66760  
At5g59880  
At3g47800  
At5g64700  
At3g04720  
At1g23020  
At5g66120  
At5g53550  
At1g06160  
At4g35830  
At4g16563  
At1g03950  
At5g42980  
At4g15960  
At4g05160  
At2g38740  
At3g57230  
At2g02020  
At2g39720  
At4g22330  
At1g21660  
At3g07890  
At3g60200  
At4g36510  
At4g30030  
At4g28420  
At1g66780  
At1g59530  
At3g30845  
At5g64300  
At5g52590  
At3g28190  
At4g04165  
At1g35860  
At5g07000  
At5g16220  
At1g75220  
At1g69760  
At3g43630  
At2g04720  
At1g52610  
At1g80130  
At2g11650  
At5g03210  
At4g16150  
At1g34280  
At2g31680  
At4g33300  
At2g47430  
At4g37150  
At5g04830  
At1g70250  
At3g28940  
At1g12140  
At3g24503  
At3g50140  
At2g39360  
At4g08930  
At3g63080  
At5g45550  
At3g11780  
At5g12170  
At5g39590  
At4g22840  
At2g15830  
At2g01540  
At3g43790

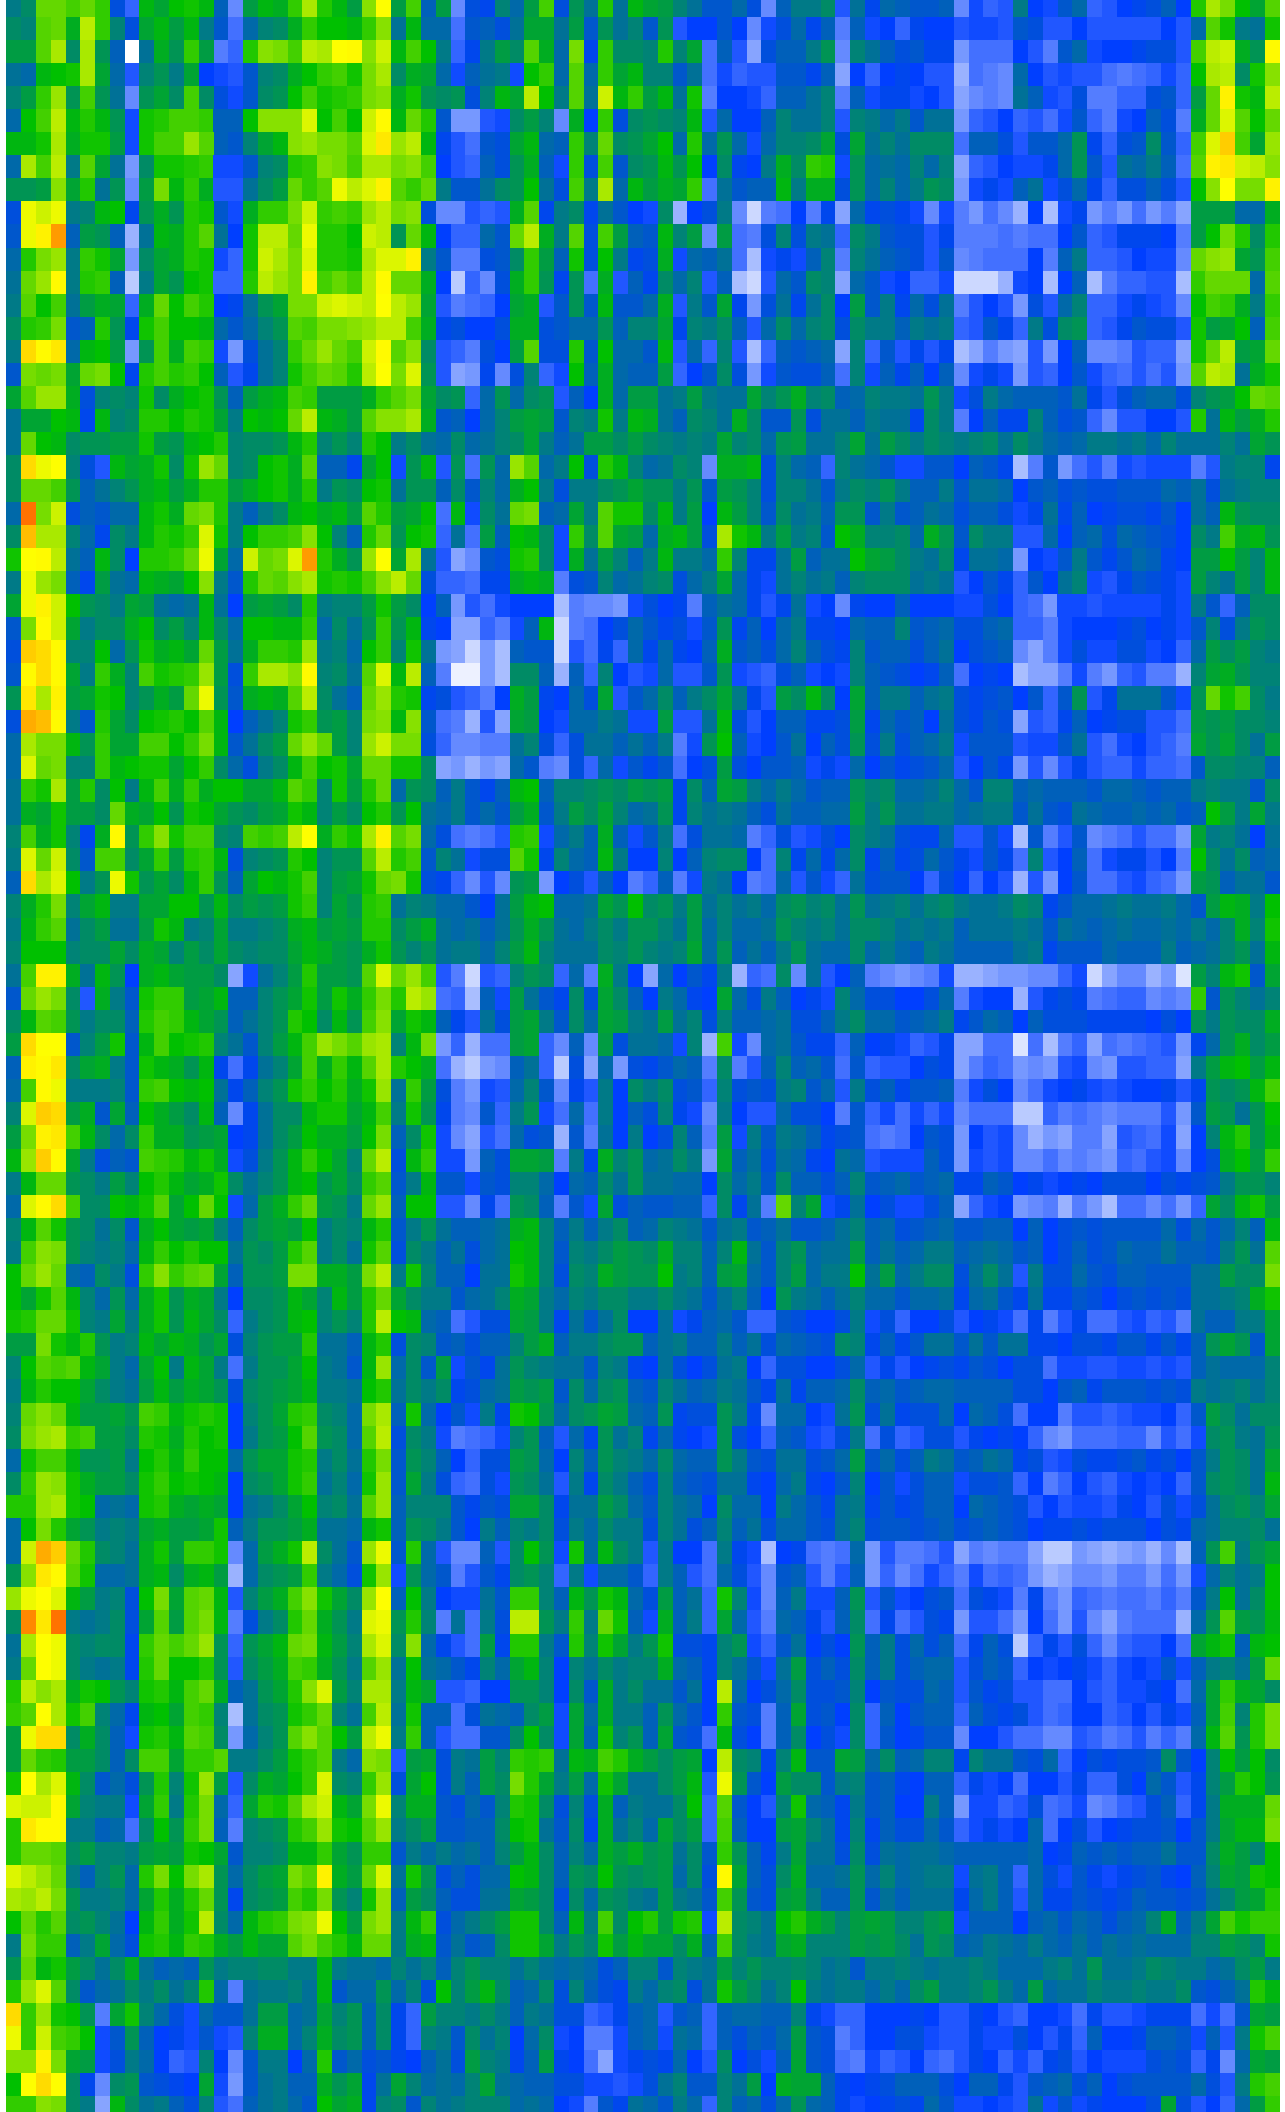

At4g22840  
At2g15830  
At2g01540  
At3g43790  
At5g63910  
At2g41490  
At5g56230  
At1g61667  
At1g69310  
At3g20310  
At5g53310  
At1g08770  
At4g15470  
At3g51970  
At1g57570  
At5g62860  
At1g35430  
At2g40730  
At3g03810  
At1g32600  
At3g15060  
At2g06310  
At2g24330  
At3g01820  
At5g05850  
At3g55940  
At3g59050  
At1g27930  
At1g23490  
At1g80510  
At2g41420  
At5g39360  
At1g56540  
At4g13340  
At3g46390  
At2g25780  
At1g67070  
At1g79160  
At4g28290  
At5g18870  
At4g09850  
At1g09030  
At1g69640  
At5g54830  
At2g31955  
At5g60270  
At1g59710  
At4g09420  
At4g16840  
At5g44820  
At4g14220  
At2g25470  
At1g51270  
At1g66570  
At2g22320  
At1g66550  
At5g24080  
At4g21440  
At5g55420  
At1g02390  
At4g16740  
At1g17150  
At2g29110  
At5g44570  
At5g66880  
At1g47890  
At3g49340  
At1g63350  
At4g22980  
At5g22540  
At1g76700  
At5g50440  
At5g45090  
At4g11000  
At1g34420  
At5g18360  
At2g31870  
At5g63130  
At2g19710  
At2g43320  
At5g25920  
At5g38310  
At2g22760  
At1g27820  
At5g39390  
At1g63030  
At3g52870  
At4g21990  
At4g04610  
At4g19515  
At3g53260  
At5g49480

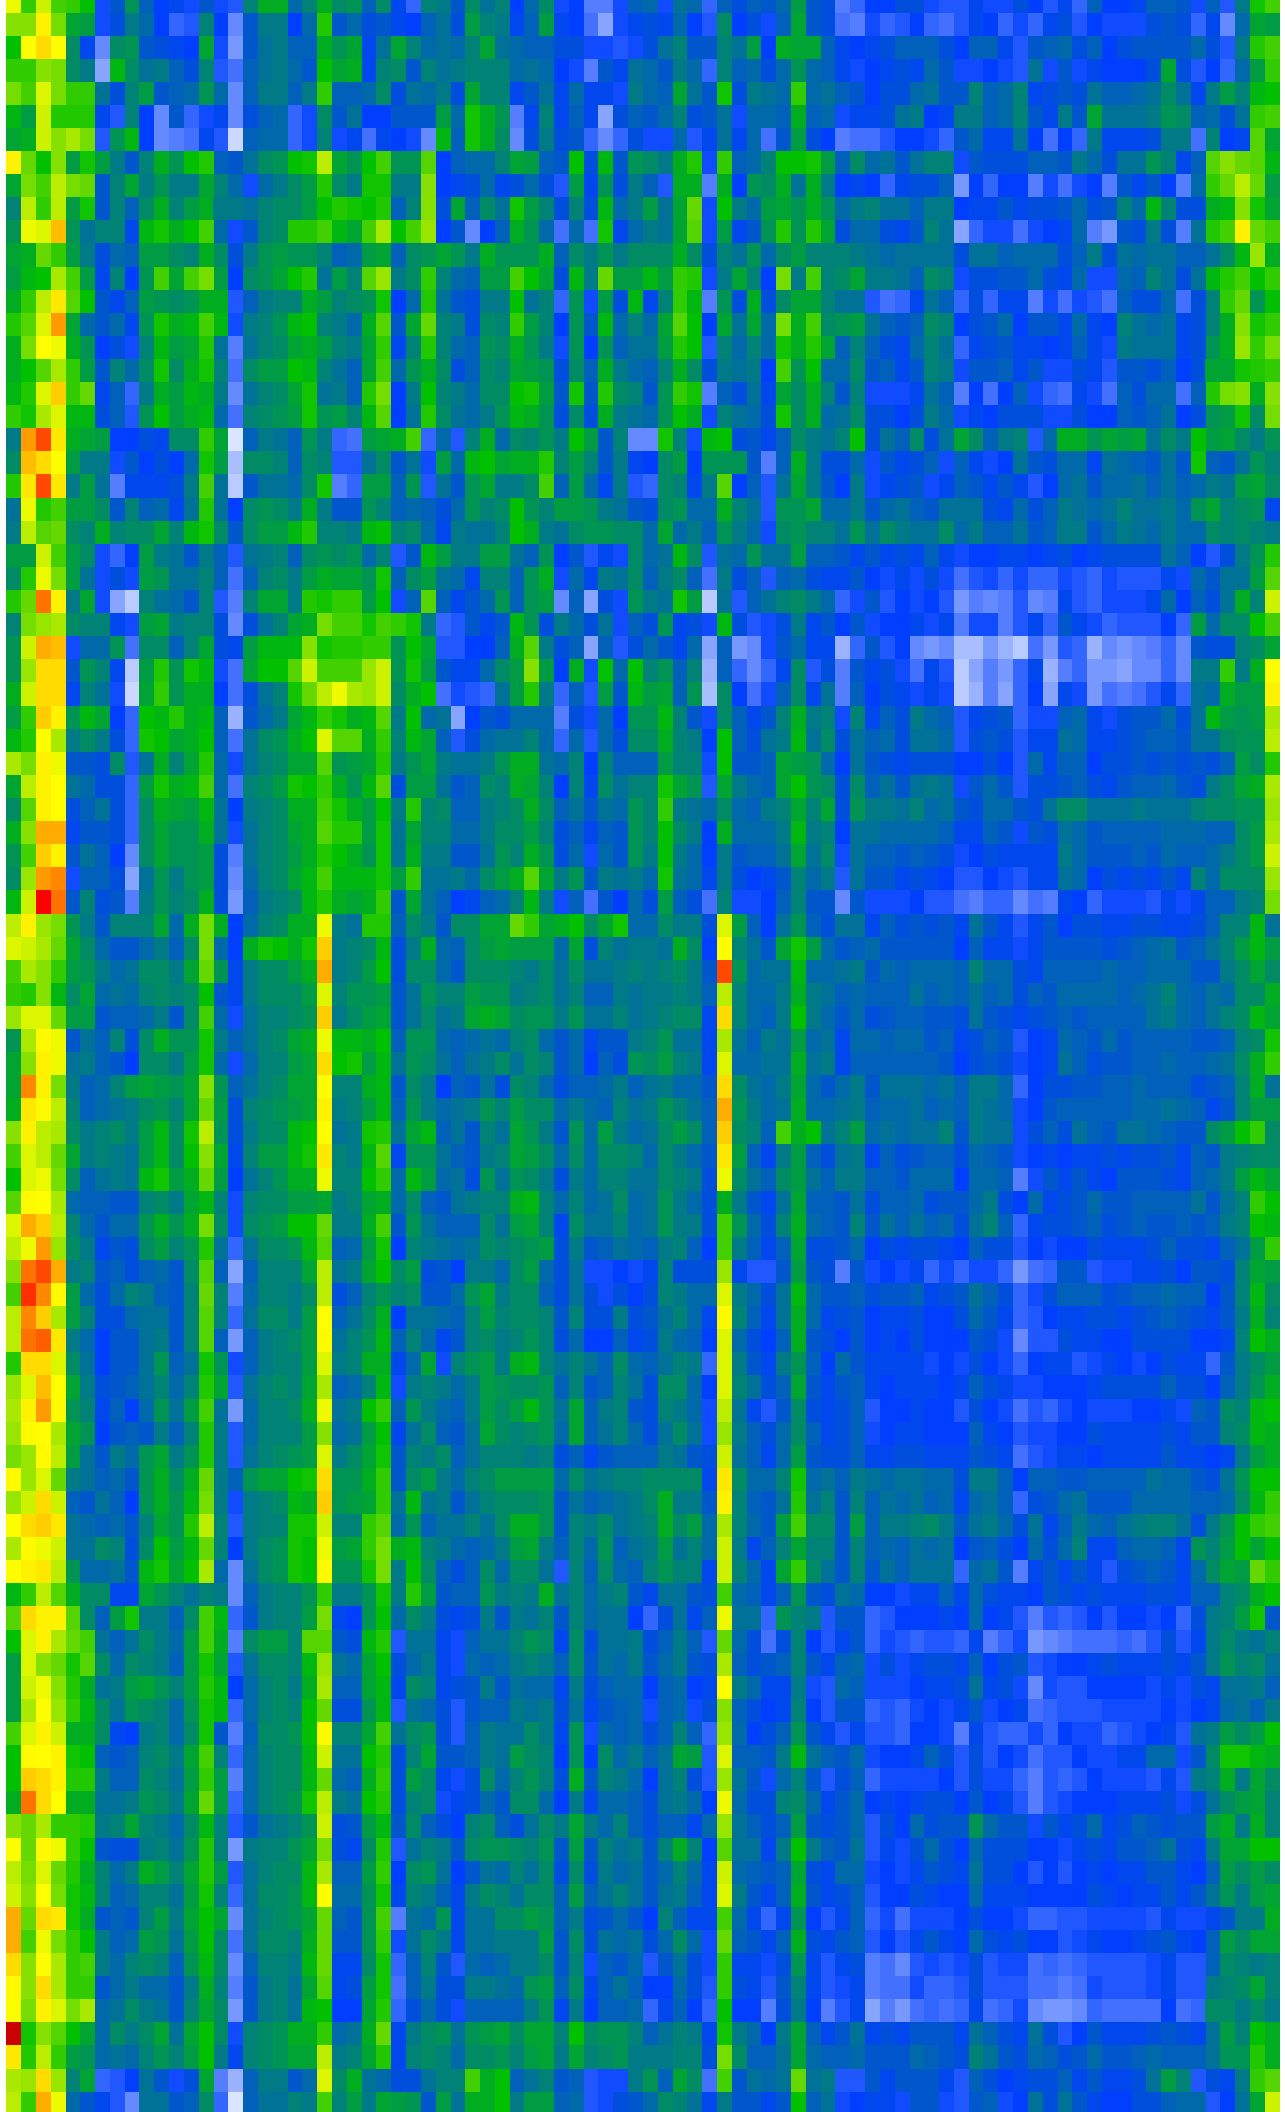

At4g04810  
At4g19515  
At3g53260  
At5g49480  
At3g48090  
At1g24100  
At3g15810  
At1g77640  
At3g47570  
At5g20150  
At2g04305  
At2g33020  
At1g69480  
At5g44820  
At5g61890  
At2g15760  
At3g49130  
At1g33030  
At3g48850  
At4g34460  
At4g30350  
At1g63830  
At2g35290  
At1g19320  
At1g04980  
At1g02460  
At4g26910  
At1g33260  
At3g19930  
At1g30000  
At1g21380  
At5g37480  
At2g04430  
At5g39580  
At2g02310  
At5g48430  
At3g55150  
At5g50200  
At5g06570  
At1g52200  
At5g22690  
At2g39650  
At5g47850  
At4g37290  
At2g32030  
At2g36690  
At5g67450  
At4g15975  
At1g07160  
At4g37770  
At1g20310  
At5g37490  
At3g28600  
At2g14290  
At3g09410  
At1g16130  
At5g66620  
At2g32140  
At1g29690  
At5g46295  
At4g14450  
At3g53810  
At5g52050  
At5g01550  
At4g11470  
At5g01560  
At5g41100  
At2g40740  
At3g04220  
At1g08650  
At1g51700  
At1g24140  
At3g44350  
At4g38560  
At3g48650  
At3g28340  
At2g20142  
At1g58420  
At5g05300  
At2g26190  
At2g46400  
At1g73805  
At1g35210  
At4g04490  
At1g73800  
At5g52760  
At5g47220  
At5g52750  
At1g42980  
At3g23240  
At1g24150  
At1g77500

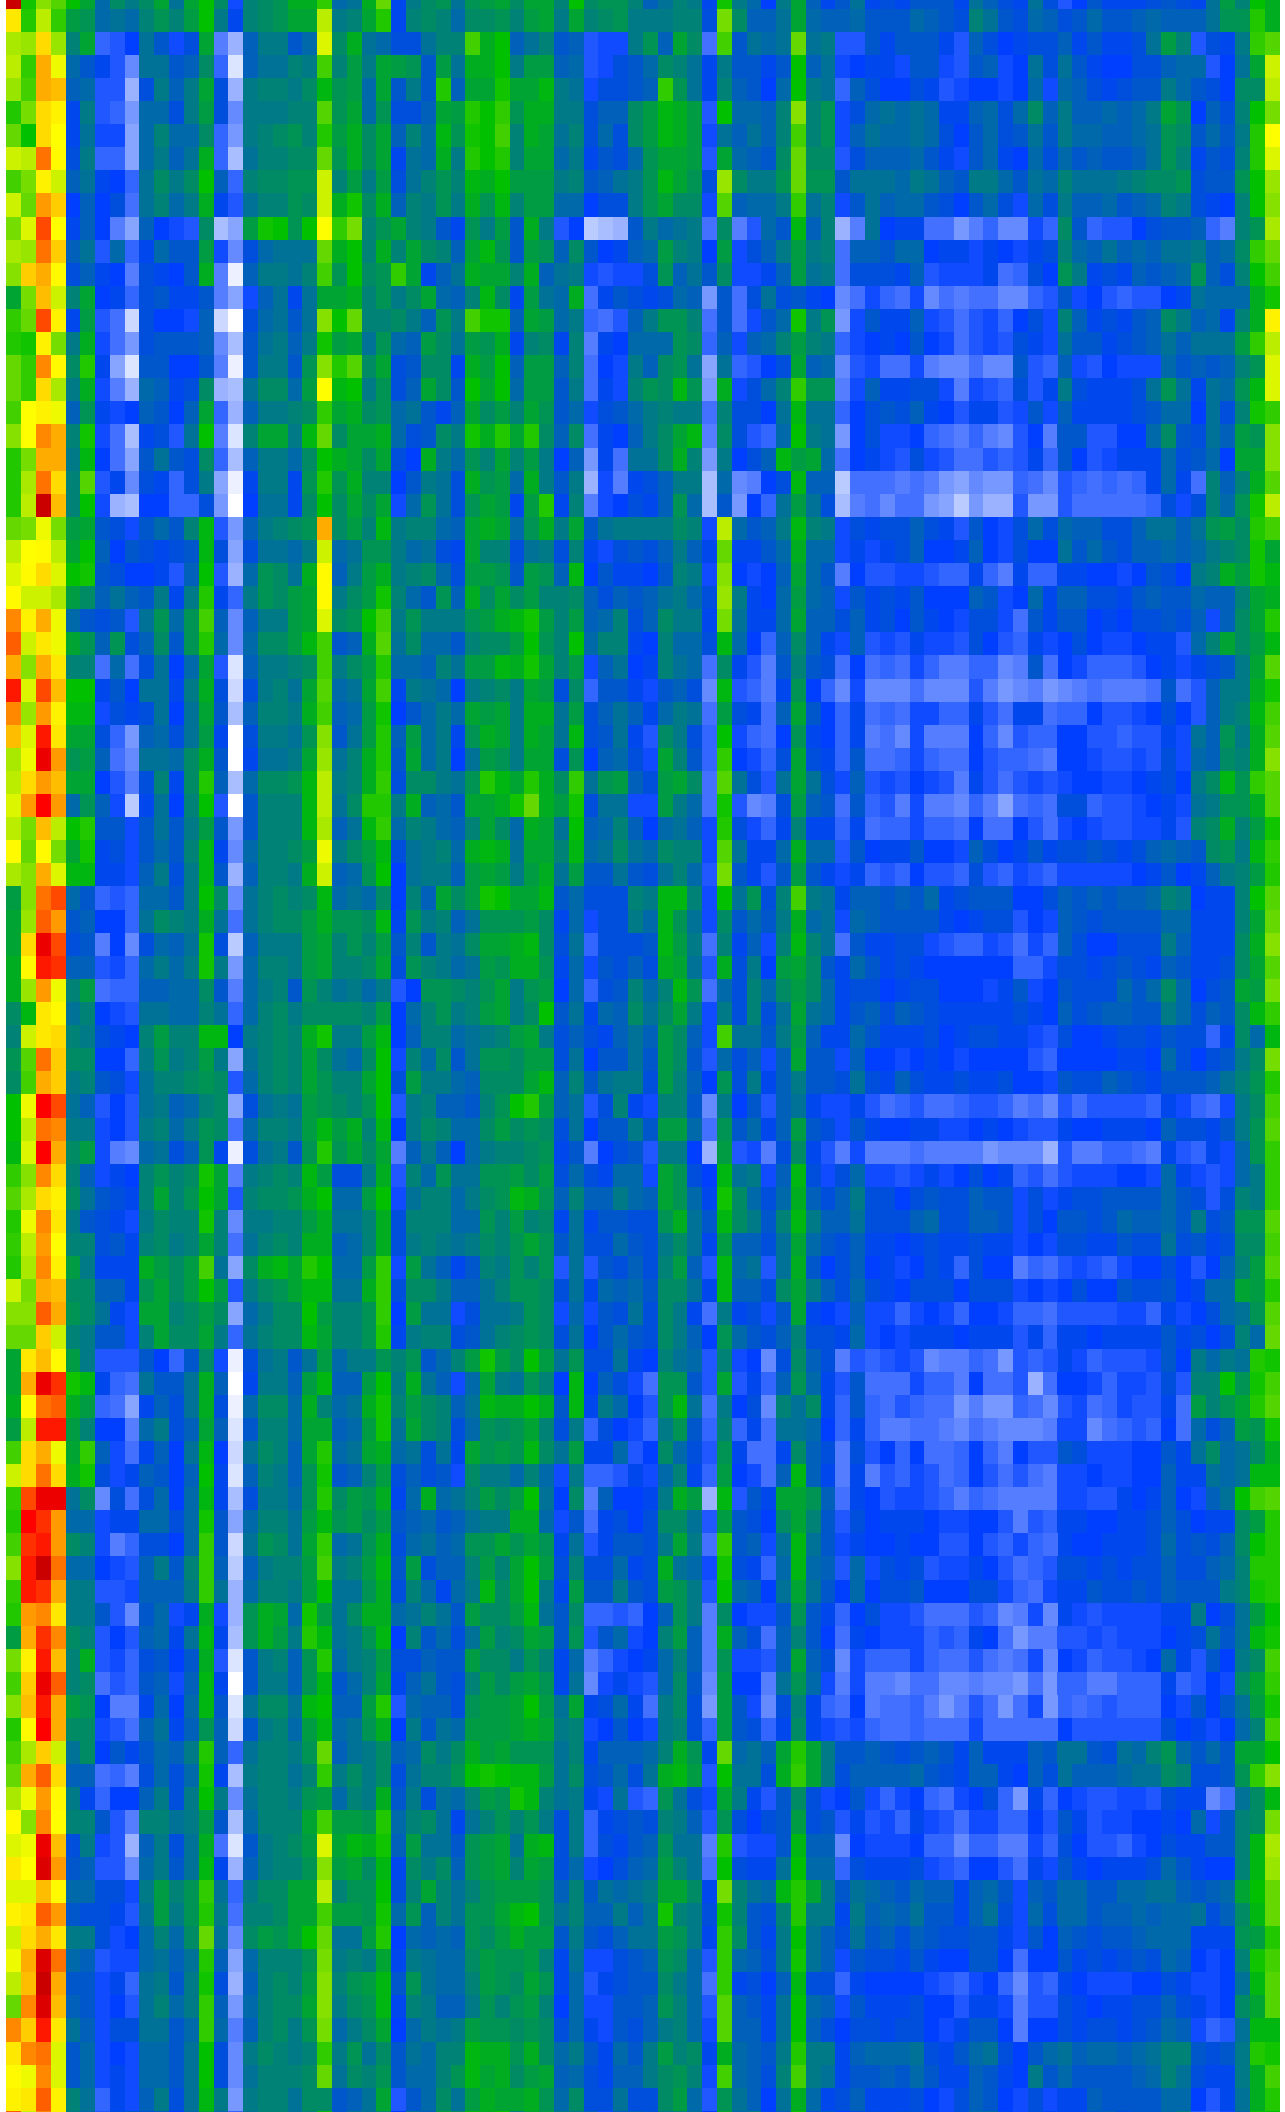

At3g23240  
At1g24150  
At1g77500  
At1g30700  
At1g13540  
At2g39380  
At1g61560  
At5g64890  
At5g44910  
At4g30060  
At4g24240  
At5g56980  
At1g22360  
At3g20410  
At4g39950  
At5g58940  
At1g01340  
At4g35985  
At3g10640  
At3g50900  
At3g01290  
At5g11670  
At5g47230  
At1g27770  
At2g21120  
At2g30040  
At3g26910  
At1g76600  
At5g63790  
At2g30250  
At2g38470  
At1g16670  
At3g21630  
At5g64660  
At3g13430  
At1g18570  
At1g05575  
At5g27420  
At1g51850  
At3g46280  
At4g20860  
At3g54420  
At3g54640  
At1g64170  
At2g29100  
At1g51890  
At1g05300  
At3g53180  
At4g01690  
At4g23010  
At1g26420  
At1g57650  
At2g16900  
At1g26380  
At5g54860  
At1g51920  
At5g45000  
At2g35980  
At2g46370  
At1g34750  
At4g34230  
At2g39210  
At4g28085  
At4g12720  
At2g39660  
At4g18950  
At5g26040  
At4g31550  
At3g25780  
At1g14330  
At1g21010  
At1g19020  
At4g20830  
At1g19180  
At5g46080  
At5g57220  
At1g80820  
At1g43160  
At4g39030  
At1g18390  
At1g61360  
At5g64905  
At5g55090  
At4g17615  
At2g35930  
At1g18380  
At4g21390  
At4g23190  
At5g12340  
At1g21120  
At4g18170

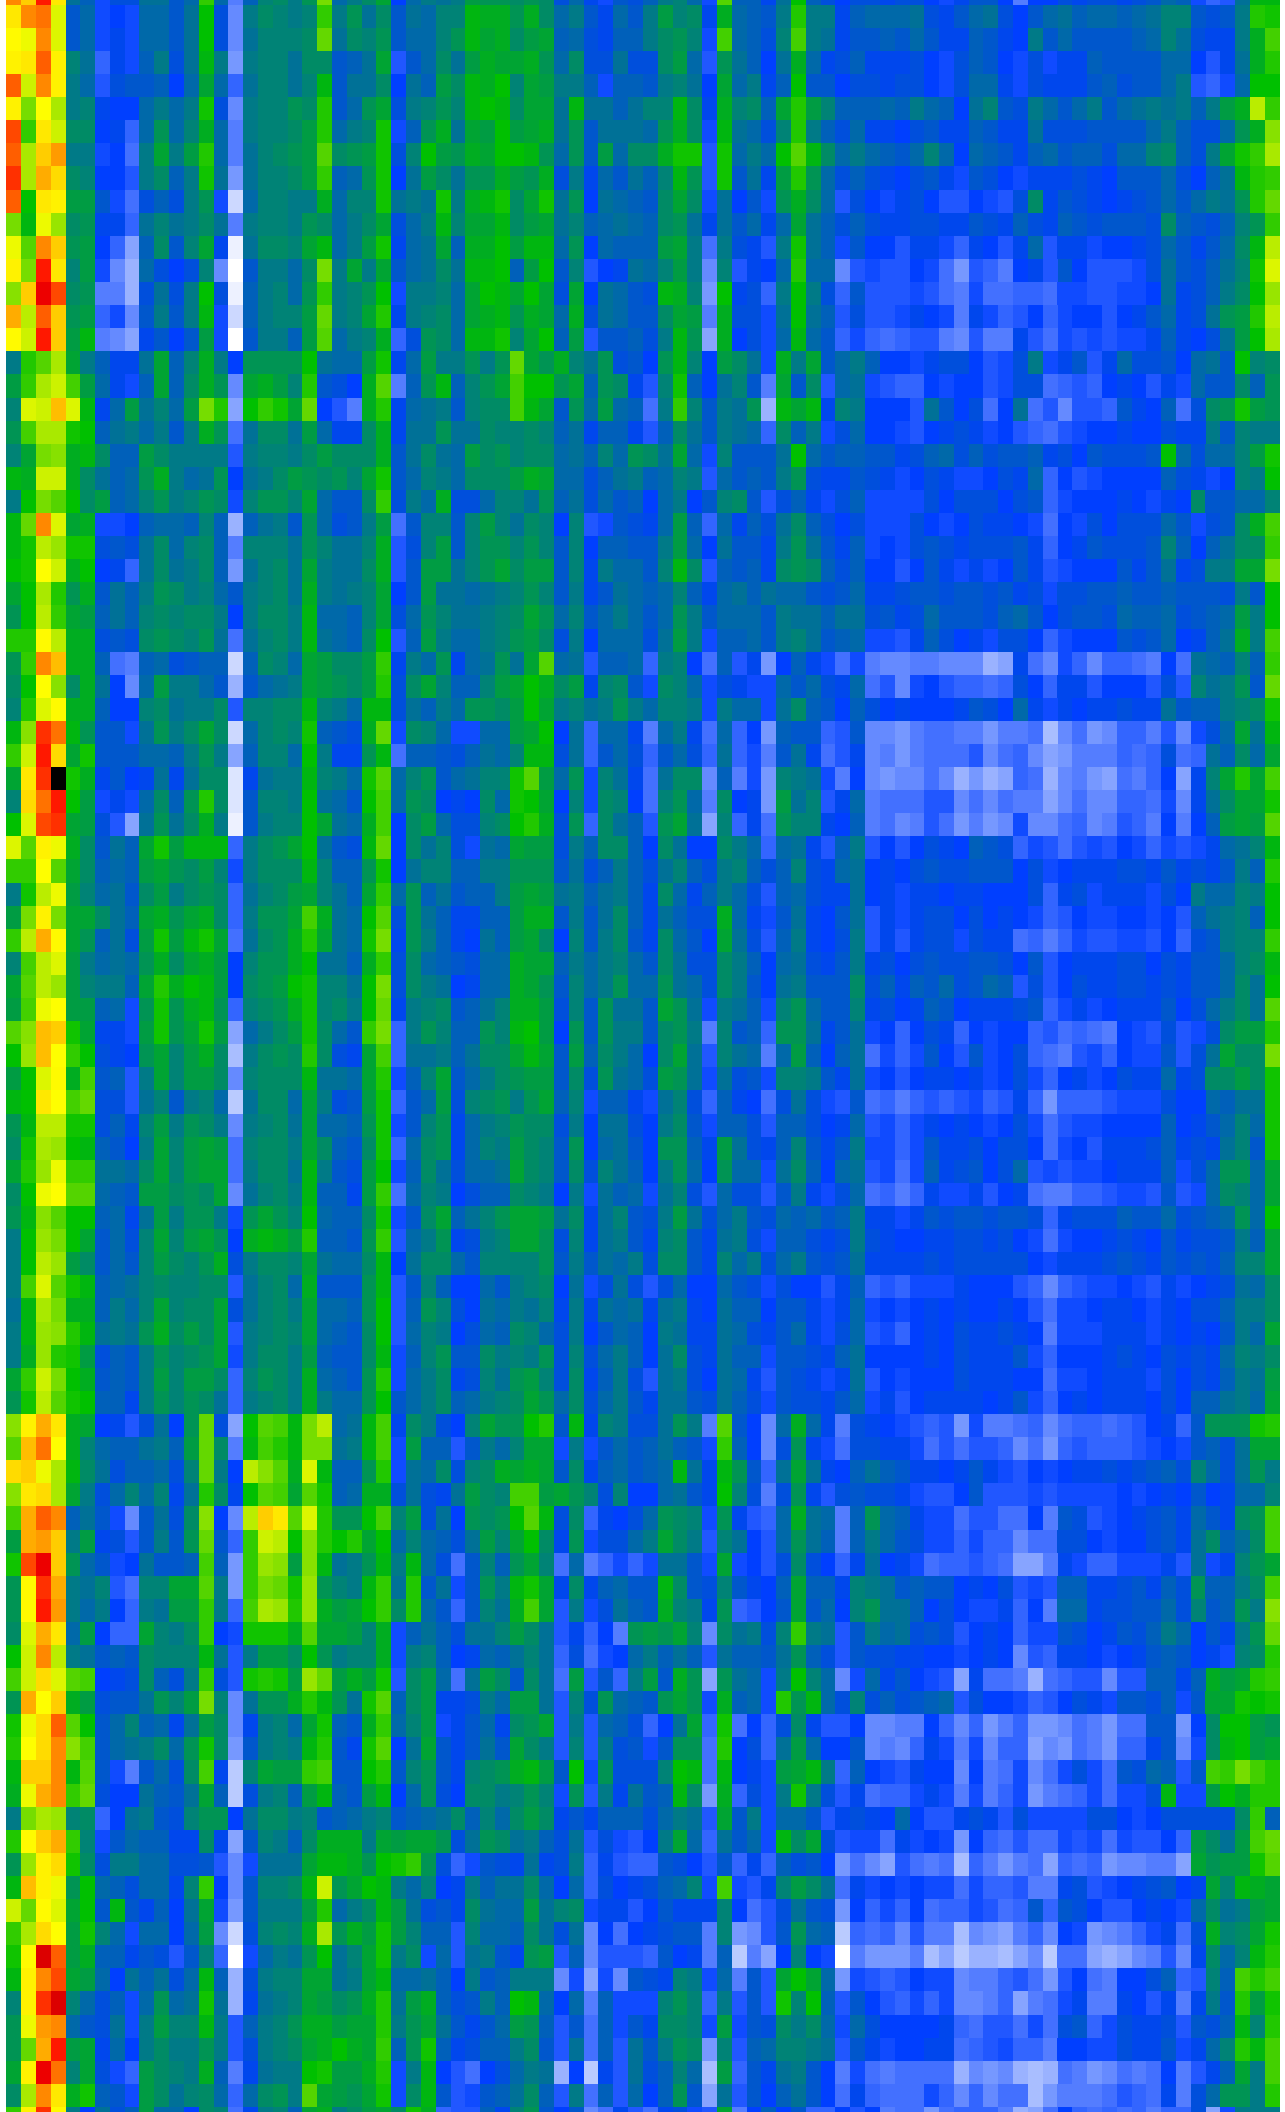

At5g12340  
At1g21120  
At4g18170  
At5g48530  
At1g26730  
At5g44990  
At5g42830  
At4g39830  
At3g55740  
At1g26410  
At5g67340  
At4g11850  
At3g59700  
At5g25930  
At3g25610  
At2g02990  
At1g52890  
At5g24810  
At1g21550  
At1g58300  
At2g04440  
At3g43270  
At5g05730  
At3g47540  
At5g38900  
At3g49620  
At2g30770  
At3g26830  
At5g37600  
At3g48890  
At2g04300  
At5g26340  
At2g26560  
At5g44290  
At5g13200  
At5g40780  
At5g46350  
At1g15520  
At2g20880  
At4g11370  
At1g79680  
At4g28140  
At1g52900  
At5g48400  
At1g61420  
At3g09010  
At3g18250  
At3g13950  
At1g32940  
At5g13320  
At1g35230  
At3g47480  
At2g29470  
At4g37990  
At4g12500  
At2g39030  
At4g12490  
At1g33960  
At3g24954  
At3g55970  
At5g67310  
At5g66070  
At5g57190  
At4g24390  
At2g41880  
At1g71697  
At5g18150  
At3g13050  
At3g26670  
At3g26020  
At4g24920  
At1g10700  
At3g57330  
At3g16860  
At1g76360  
At4g01010  
At1g50740  
At5g14930  
At1g45616  
At1g51680  
At5g48930  
At2g01180  
At1g25400  
At3g25600  
At4g23270  
At5g04020  
At5g20050  
At5g64120  
At4g01720  
At3g57280  
At4g17070

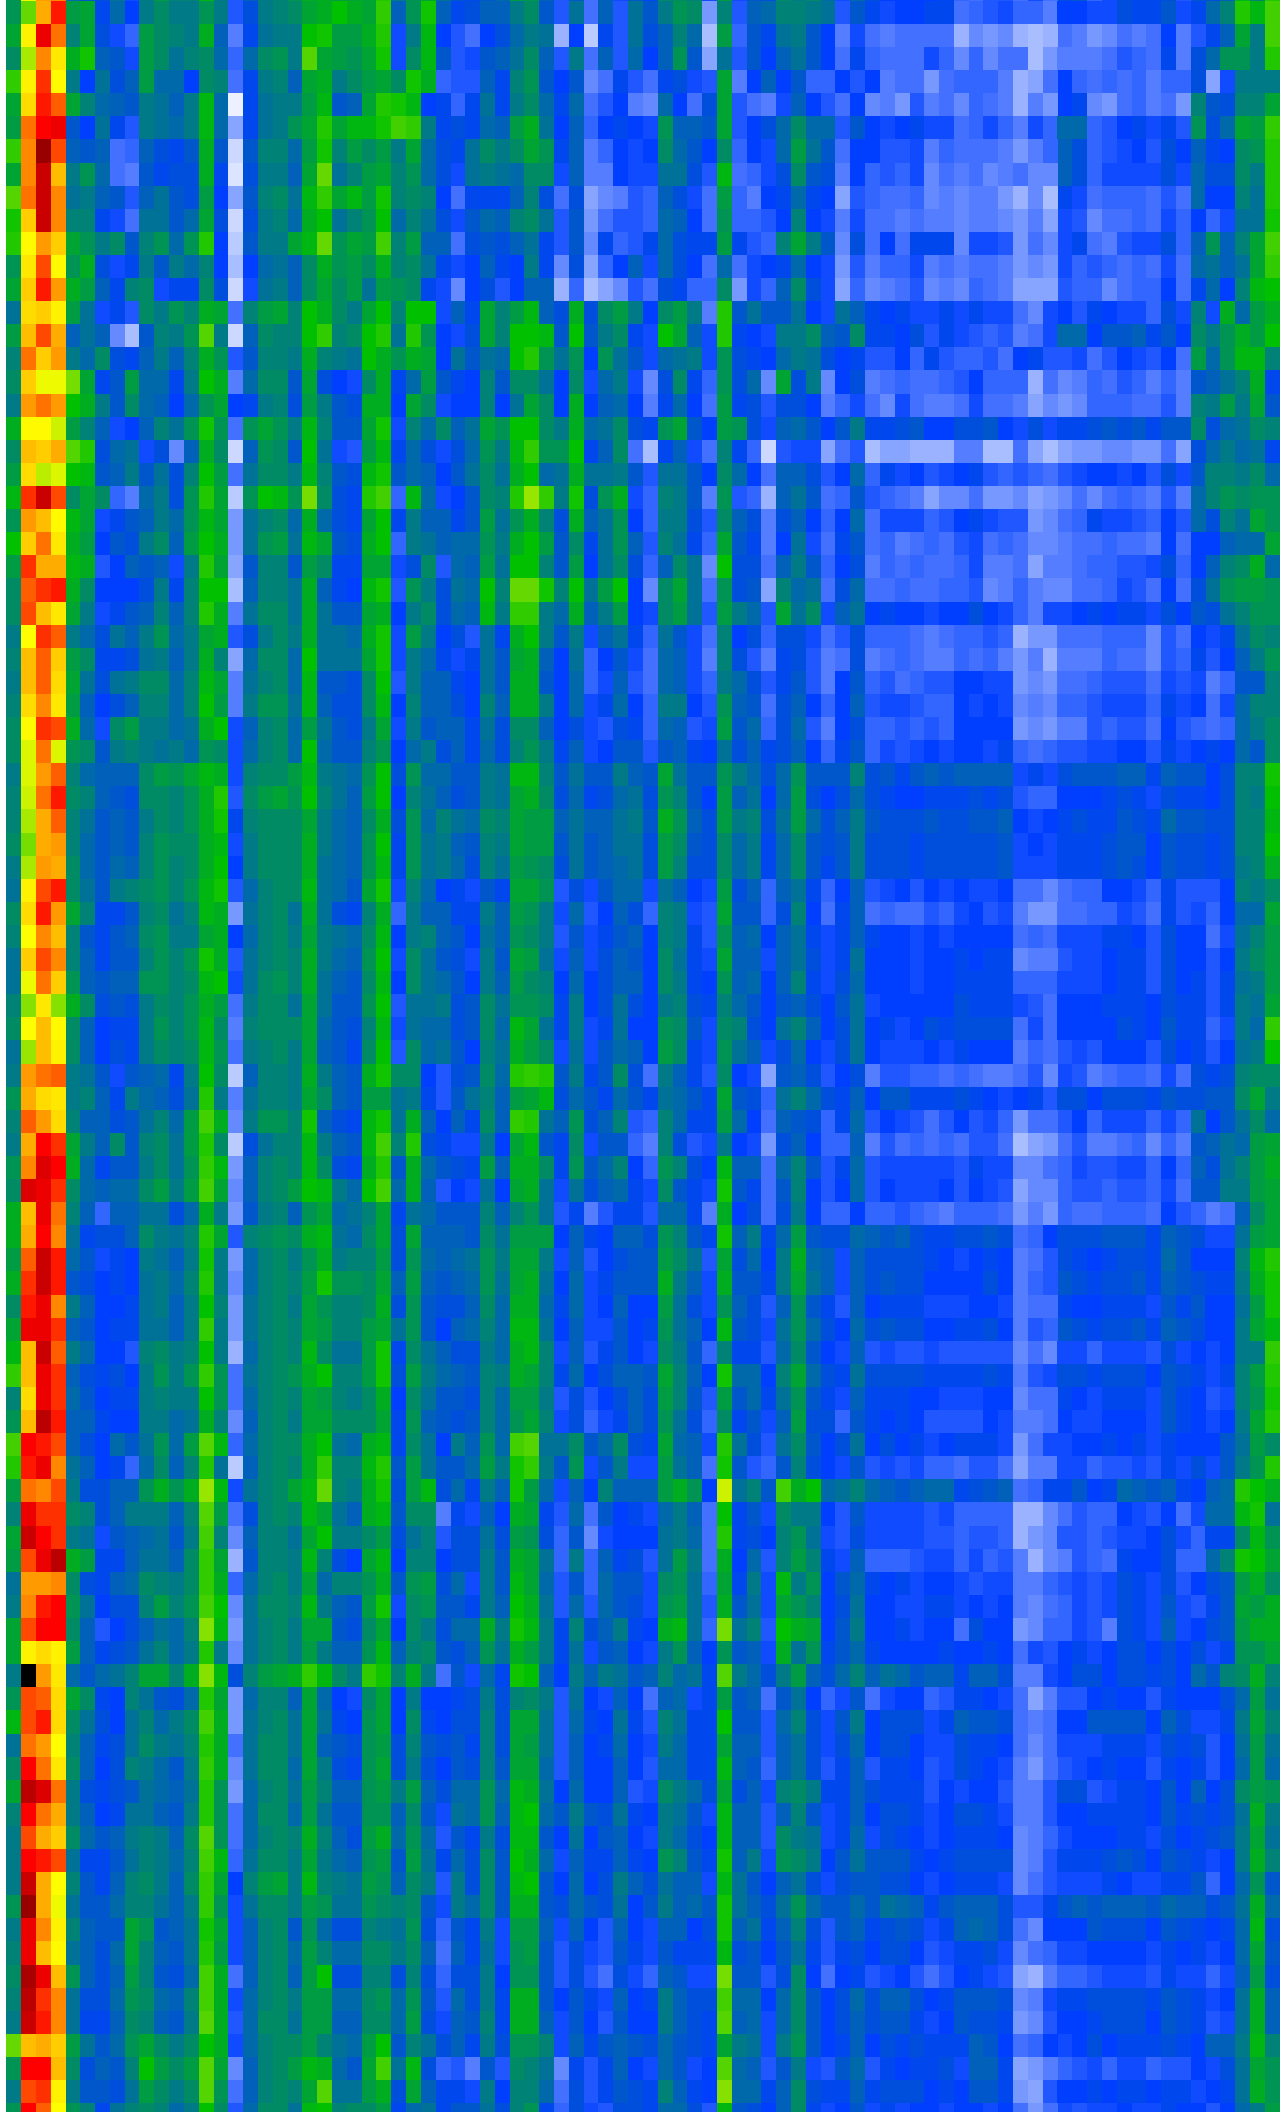

At4g01720  
At3g57280  
At4g17070  
At1g20780  
At1g18890  
At1g63500  
At2g23770  
At2g37940  
At4g25030  
At2g18690  
At4g36030  
At1g74100  
At2g20630  
At3g21220  
At3g10300  
At1g78240  
At3g47960  
At5g46330  
At5g13220  
At1g09070  
At2g34600  
At1g19310  
At1g61610  
At2g18680  
At4g31800  
At4g35480  
At1g30135  
At4g36670  
At5g05600  
At1g22400  
At2g38240  
At3g22060  
At3g23550  
At3g45050  
At4g04510  
At1g49000  
At2g19190  
At2g17740  
At1g61380  
At1g57630  
At2g43620  
At4g22470  
At4g23210  
At1g61120  
At3g43250  
At1g10585  
At2g17840  
At1g11960  
At1g44350  
At5g43190  
At5g61560  
At5g05190  
At5g48540  
At4g25350  
At2g27660  
At3g52450  
At3g21230  
At1g02400  
At3g63380  
At2g39200  
At1g51800  
At1g51790  
At4g01250  
At1g76070  
At1g51620  
At1g19380  
At1g66160  
At5g25440  
At5g55050  
At2g42360  
At2g22880  
At3g48520  
At1g74330  
At2g06050  
At3g51450  
At3g25180  
At1g17420  
At4g28350  
At2g27690  
At1g15010  
At1g51820  
At5g53750  
At3g55830  
At4g32800  
At2g34930  
At5g54720  
At1g65390  
At1g65390  
At5g26220  
At3g50760  
At4g29740  
At1g46120

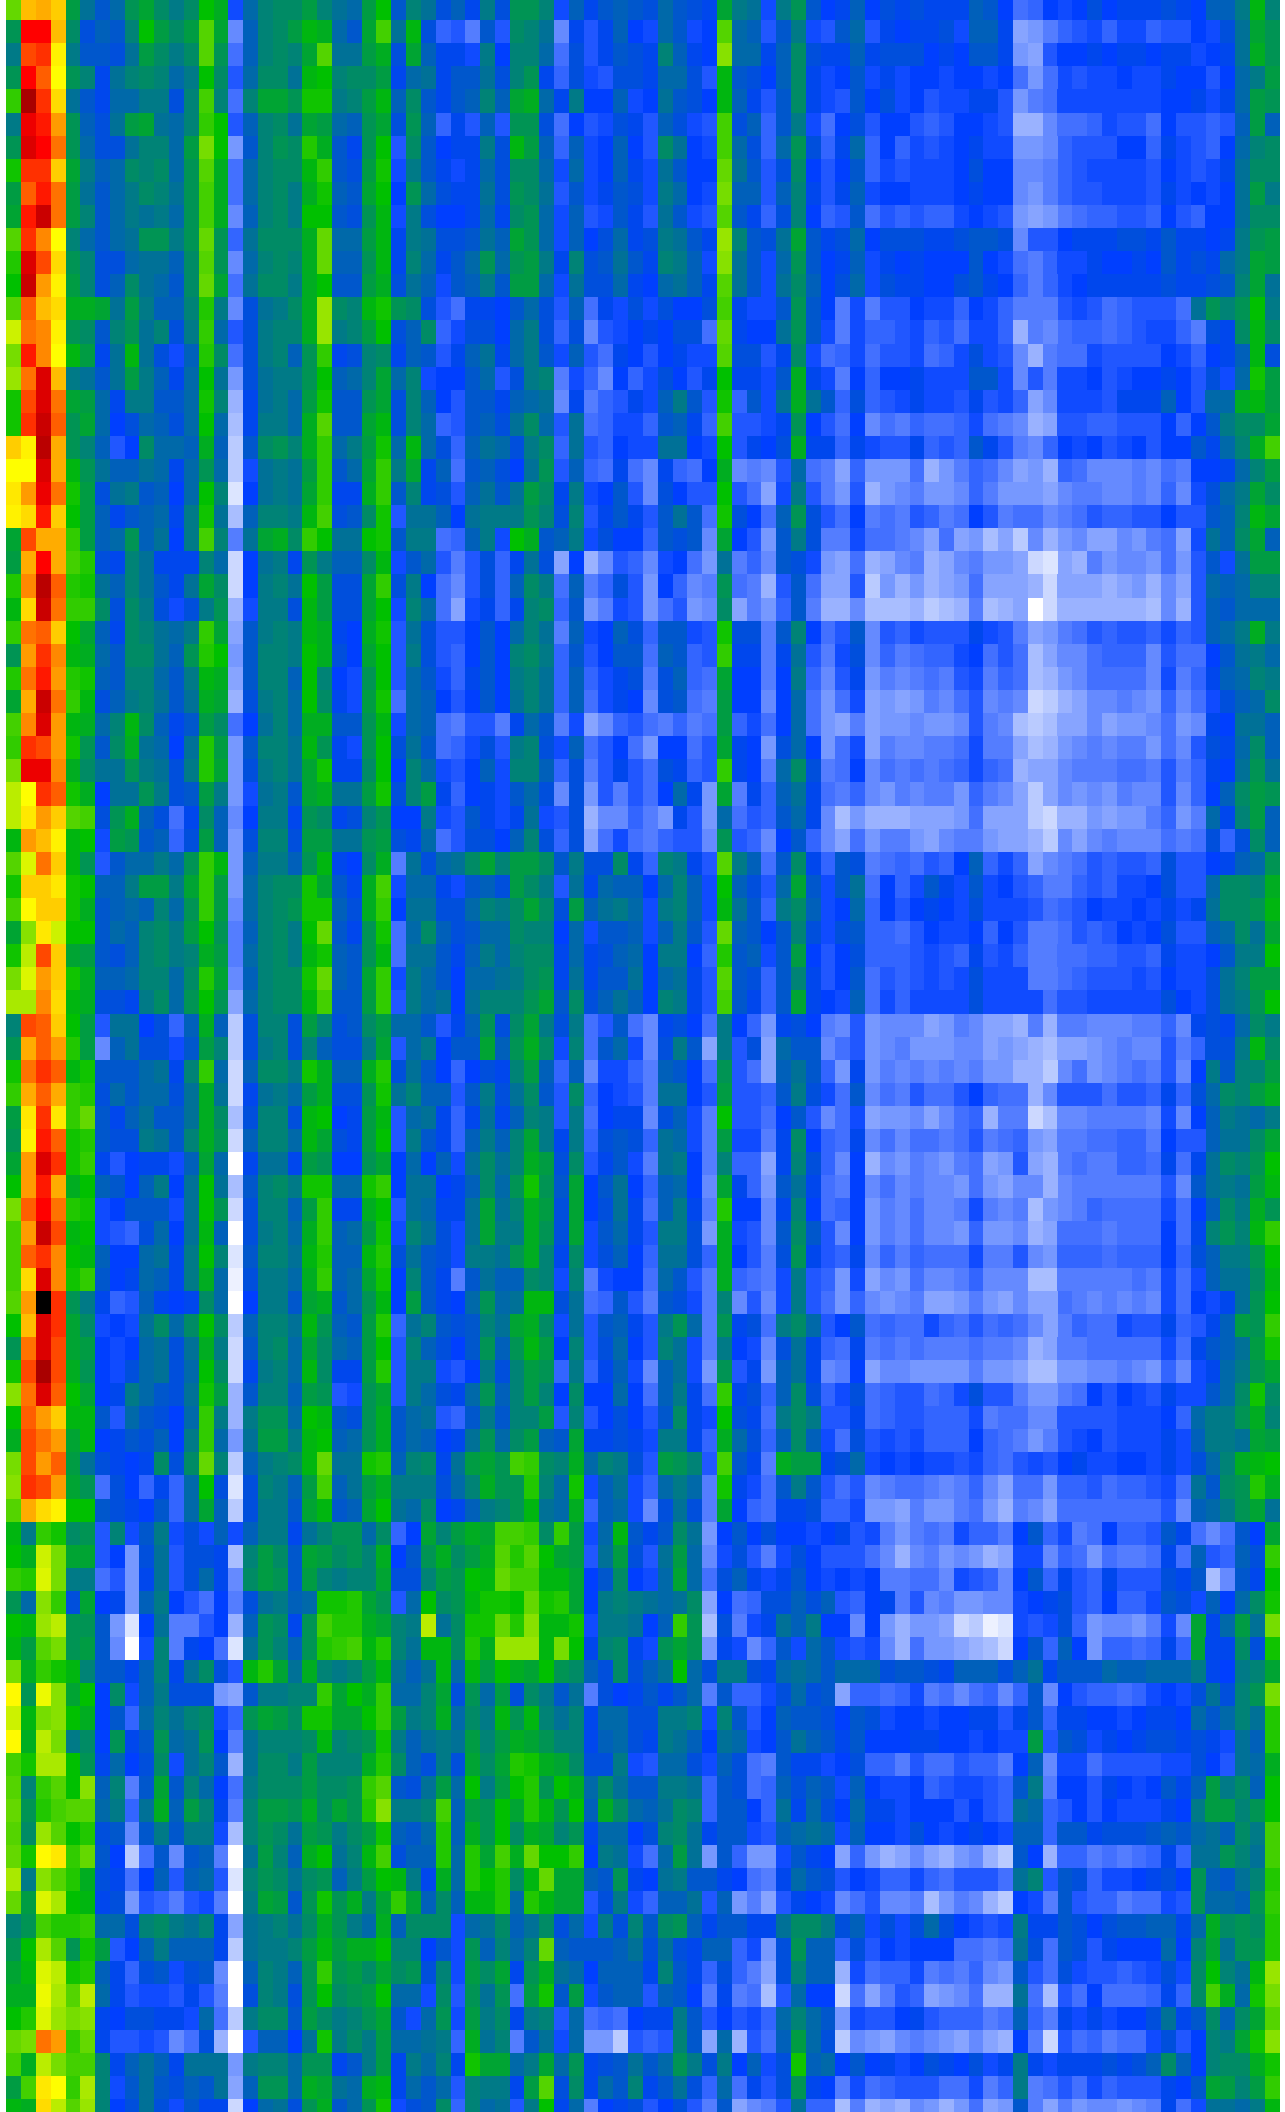

At5g26220  
At3g50760  
At4g29740  
At1g16420  
At1g09940  
At4g23200  
At3g01830  
At1g66090  
At5g01540  
At2g25735  
At1g56060  
At3g02840  
At1g72520  
At2g47060  
At3g59080  
At2g24600  
At1g53430  
At5g44070  
At3g11820  
At1g03370  
At2g20960  
At1g28380  
At2g26530  
At3g05320  
At4g30530  
At4g36500  
At4g38550  
At1g20510  
At4g23220  
At4g14365  
At4g33050  
At1g55450  
At4g34150  
At4g39640  
At4g08850  
At2g41100  
At4g18010  
At3g21780  
At1g01560  
At1g80840  
At1g78410  
At4g18250  
At4g23800  
At5g26920  
At2g27500  
At5g17000  
At5g13190  
At4g35600  
At2g23680  
At1g10340  
At5g61210  
At1g07135  
At3g09830  
At3g52400  
At4g34390  
At1g07000  
At1g03740  
At1g74360  
At1g62840  
At5g35735  
At3g46110  
At2g22500  
At3g57450  
At1g59910  
At4g30210  
At5g67300  
At2g43820  
At5g17380  
At4g16760  
At3g50740  
At3g51580  
At3g17810  
At1g05100  
At1g55920  
At4g30490  
At4g01870  
At4g27410  
At5g39610  
At1g48000  
At1g68620  
At2g23450  
At4g26080  
At5g35460  
At3g07720  
At2g37580  
At2g38640  
At2g16740  
At5g13550  
At4g23850  
At2g16870  
At2g43850  
At1g11310

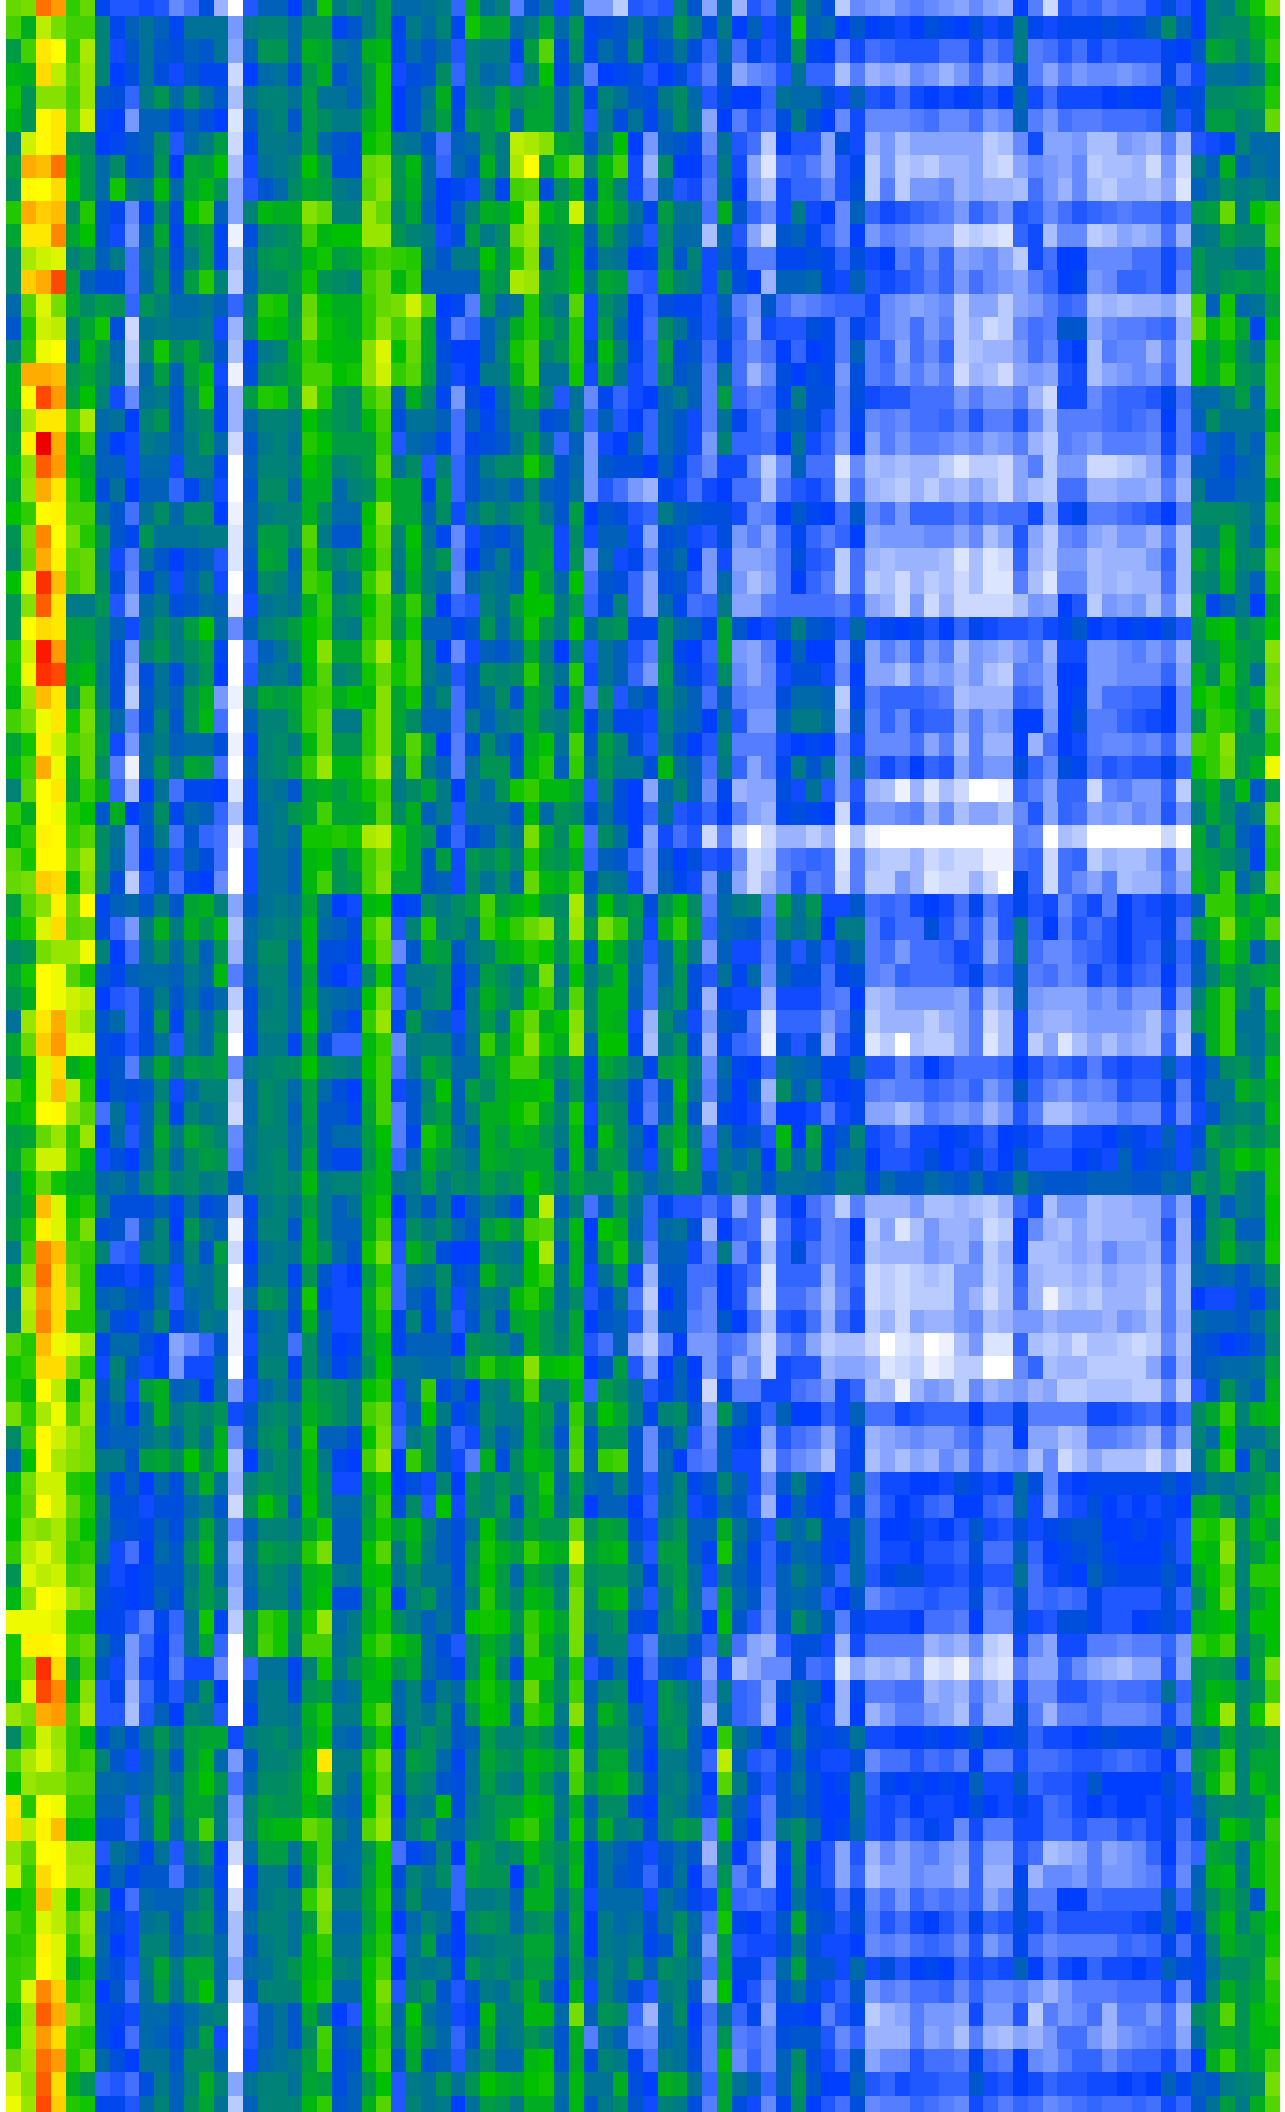

At4g23850  
At2g16870  
At2g43850  
At1g11310  
At2g43570  
At3g26210  
At1g01470  
At4g32300  
At4g19140  
At3g02070  
At1g30640  
At2g27580  
At5g41800  
At4g31080  
At5g58070  
At1g65520  
At1g08315  
At1g02170  
At1g48320  
At2g15390  
At1g14000  
At5g45410  
At2g30550  
At5g04930  
At5g07910  
At5g18490  
At5g04170  
At1g57943  
At3g28450  
At3g17410  
At4g10140  
At2g23810  
At3g52710  
At2g46620  
At3g18820  
At4g39780  
At1g53580  
At1g04960  
At1g01550  
At5g51620  
At1g77810  
At3g51430  
At1g66830  
At5g33290  
At3g60690  
At5g37070  
At5g46050  
At2g27150  
At2g30140  
At2g43510  
At1g32960  
At1g59950  
At5g57630  
At3g57090  
At1g22070  
At3g18830  
At5g51070  
At5g57060  
At5g03490  
At4g05320  
At2g02930  
At1g65500  
At5g36220  
At5g02630  
At3g06500  
At5g63850  
At1g18740  
At5g59550  
At2g42760  
At5g22250  
At3g57530  
At3g52800  
At1g07240  
At5g07100  
At1g14380  
At3g21080  
At3g16720  
At1g28370  
At2g47190  
At1g42990  
At1g75020  
At5g38210  
At3g09020  
At5g39680  
At5g18470  
At5g25910  
At3g22160  
At5g10190  
At1g31130  
At1g64280  
At5g65600  
At3g11840



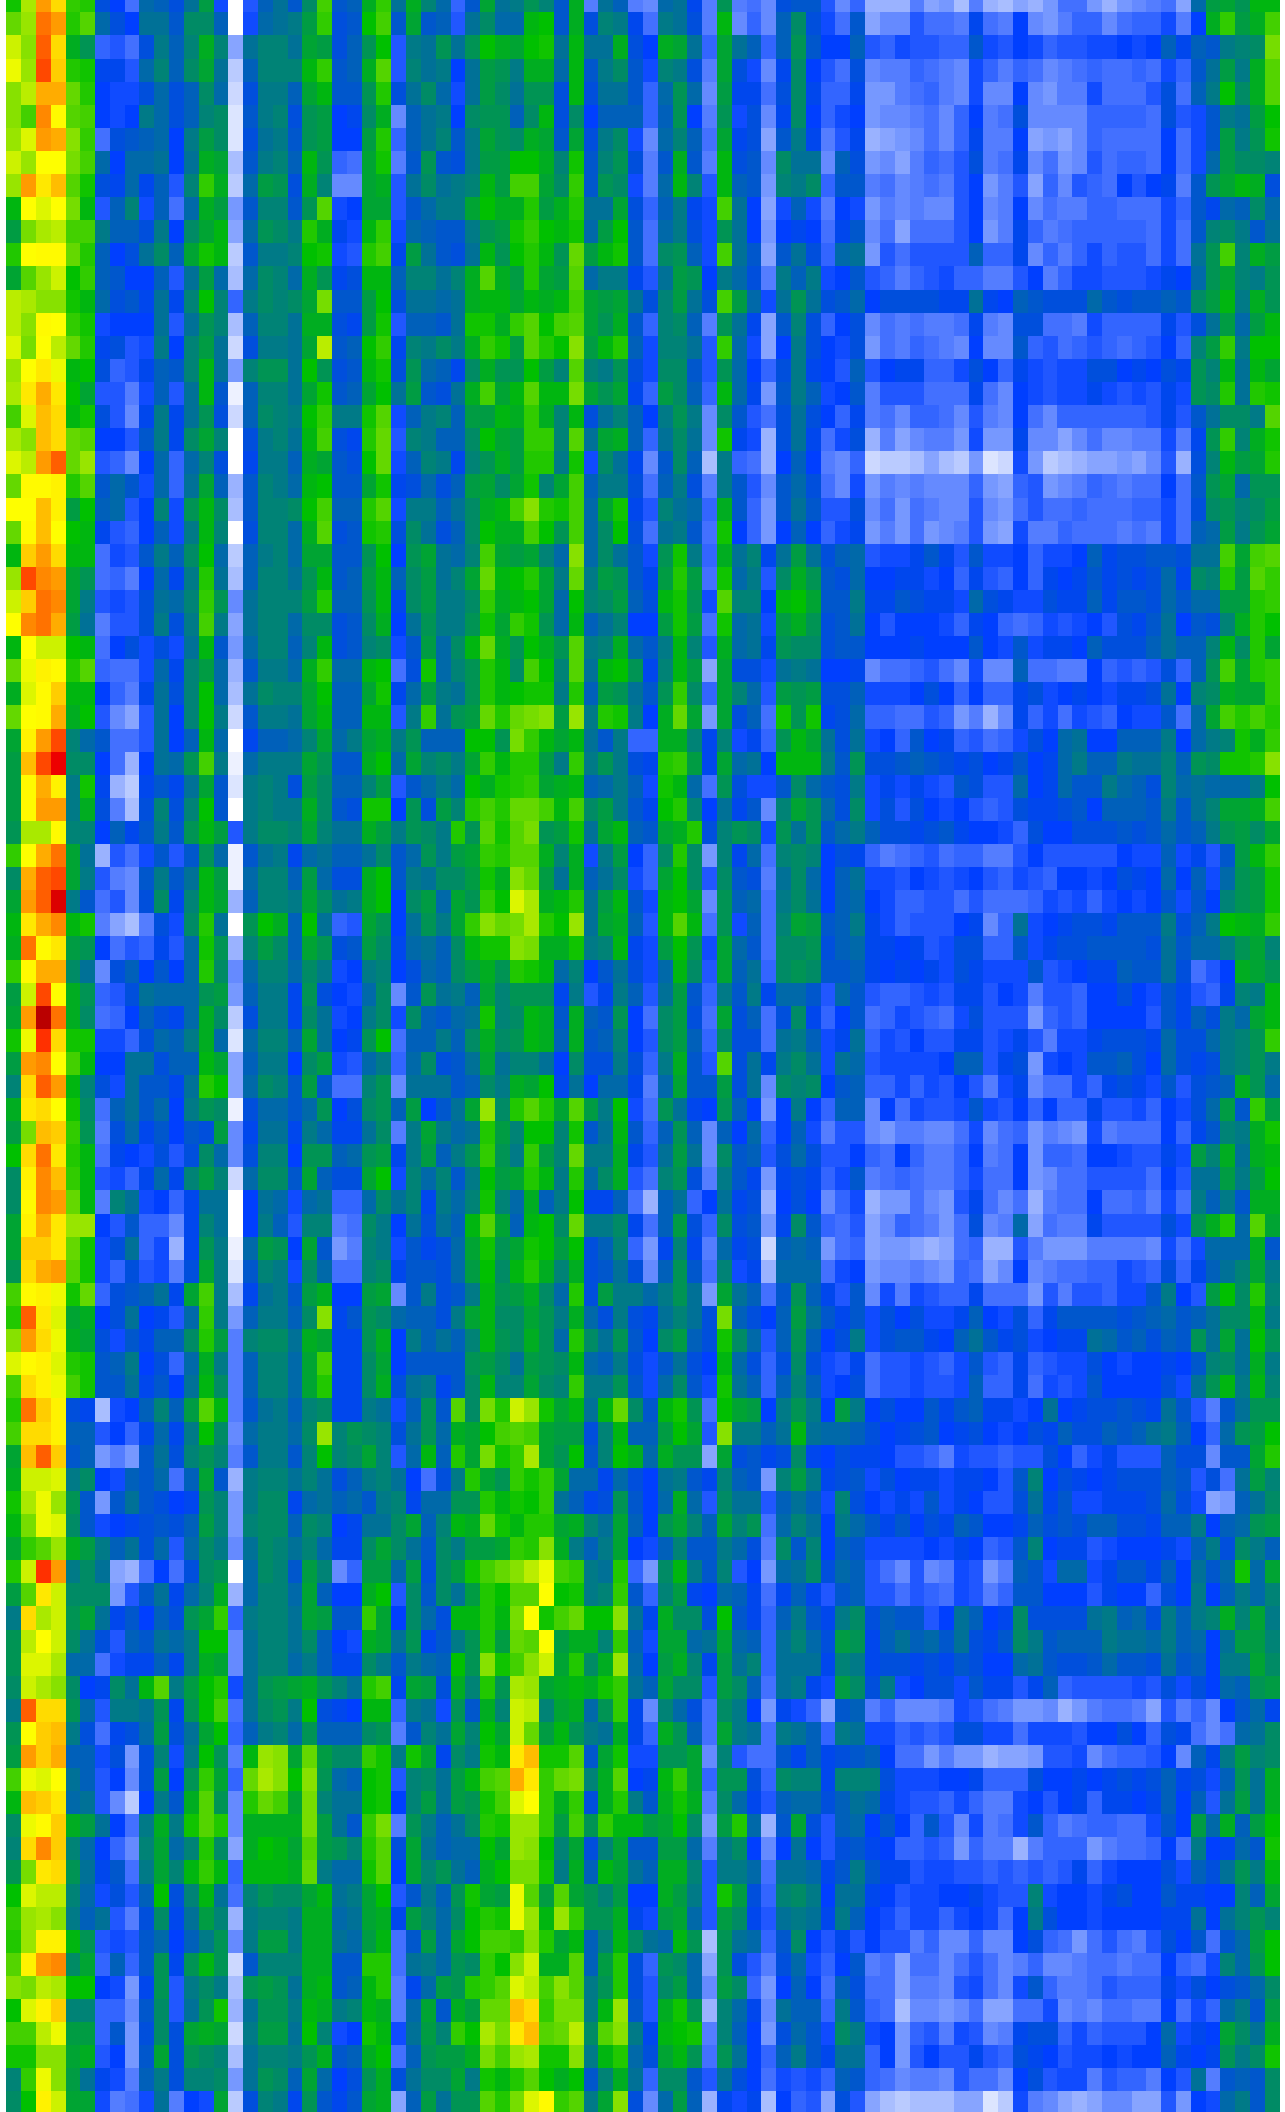

At1g57130  
At1g64280  
At5g65600  
At3g11840  
At2g05940  
At1g66880  
At2g17220  
At5g47070  
At1g69840  
At5g62570  
At3g04640  
At2g33580  
At5g10695  
At4g29780  
At1g27730  
At1g11050  
At1g74950  
At3g15210  
At2g27310  
At4g18880  
At5g42050  
At1g32920  
At1g69890  
At4g17230  
At3g44720  
At5g49520  
At3g23250  
At2g38250  
At1g76650  
At5g47910  
At5g65300  
At4g33985  
At4g02350  
At5g24430  
At1g18210  
At4g33910  
At5g25450  
At5g12010  
At1g76390  
At1g70140  
At3g45040  
At1g78280  
At3g57760  
At2g04400  
At2g38290  
At1g28190  
At1g51660  
At5g20480  
At5g07070  
At5g50210  
At3g62150  
At5g38710  
At5g54110  
At4g28400  
At1g63090  
At5g26770  
At1g22510  
At5g66210  
At1g17380  
At3g55980  
At4g24570  
At5g18400  
At5g15870  
At4g21400  
At2g23120  
At1g27760  
At3g14200  
At4g18280  
At3g47550  
At1g28050  
At1g17980  
At1g76580  
At4g36010  
At5g41170  
At5g54170  
At2g38870  
At2g02180  
At1g15430  
At5g27520  
At5g39785  
At1g25370  
At4g21120  
At2g32190  
At3g17860  
At5g39785  
At2g23320  
At2g28400  
At4g39890  
At3g07370  
At1g13330  
At5g07010  
At5g54960

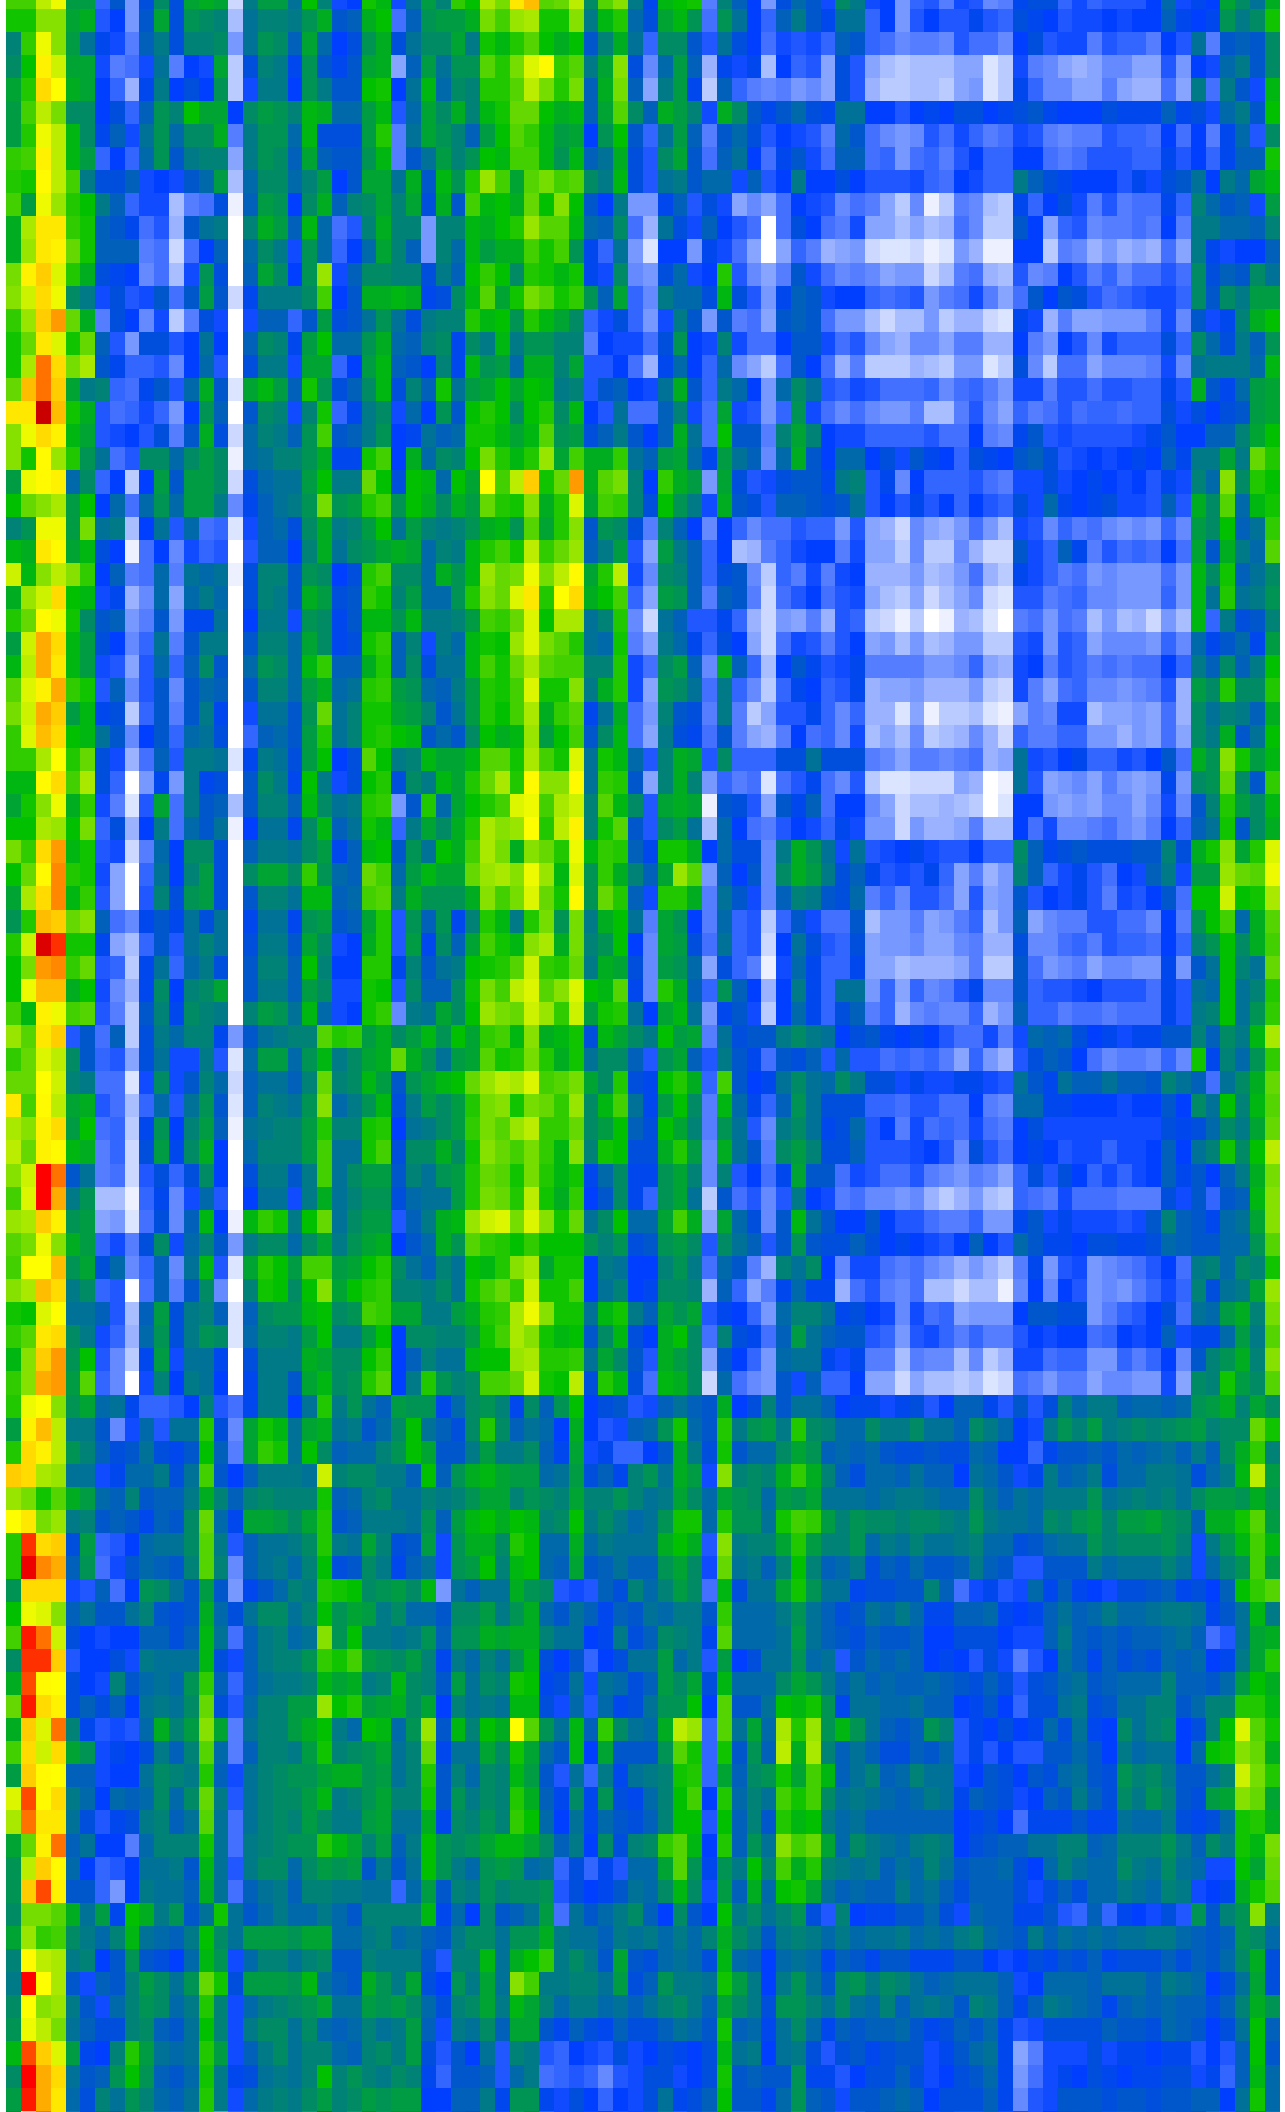

At1g13330  
At5g07010  
At5g54960  
At2g31955  
At5g67080  
At5g39050  
At2g29460  
At5g13590  
At5g27840  
At4g05050  
At4g05050  
At1g29340  
At2g36220  
At5g13160  
At2g41410  
At3g12740  
At4g35110  
At1g22280  
At4g33920  
At1g53110  
At1g14740  
At3g27010  
At1g09430  
At4g32040  
At5g04750  
At3g12400  
At4g28300  
At3g14050  
At5g04340  
At1g21080  
At3g05200  
At3g14090  
At4g29900  
At5g59420  
At1g69410  
At1g62420  
At1g70530  
At3g16785  
At3g22260  
At2g36330  
At4g12070  
At3g51890  
At1g76970  
At2g29990  
At5g03700  
At4g35510  
At5g01715  
At2g40140  
At1g67920  
At1g63720  
At2g02220  
At1g09970  
At3g46940  
At3g21520  
At5g16830  
At5g05140  
At3g53000  
At1g08050  
At1g22180  
At4g34180  
At4g32030  
At2g37550  
At2g39770  
At4g31000  
At1g12610  
At3g62720  
At3g26980  
At3g26980  
At2g20370  
At4g21200  
At3g21070  
At4g21410  
At1g68410  
At4g30280  
At2g02860  
At2g27080  
At2g29440  
At4g25810  
At5g01380  
At2g44370  
At1g48850  
At4g39980  
At2g40280  
At2g17660  
At1g09950  
At4g08170  
At1g56660  
At5g59580  
At5g44050  
At3g10720  
At3g58620

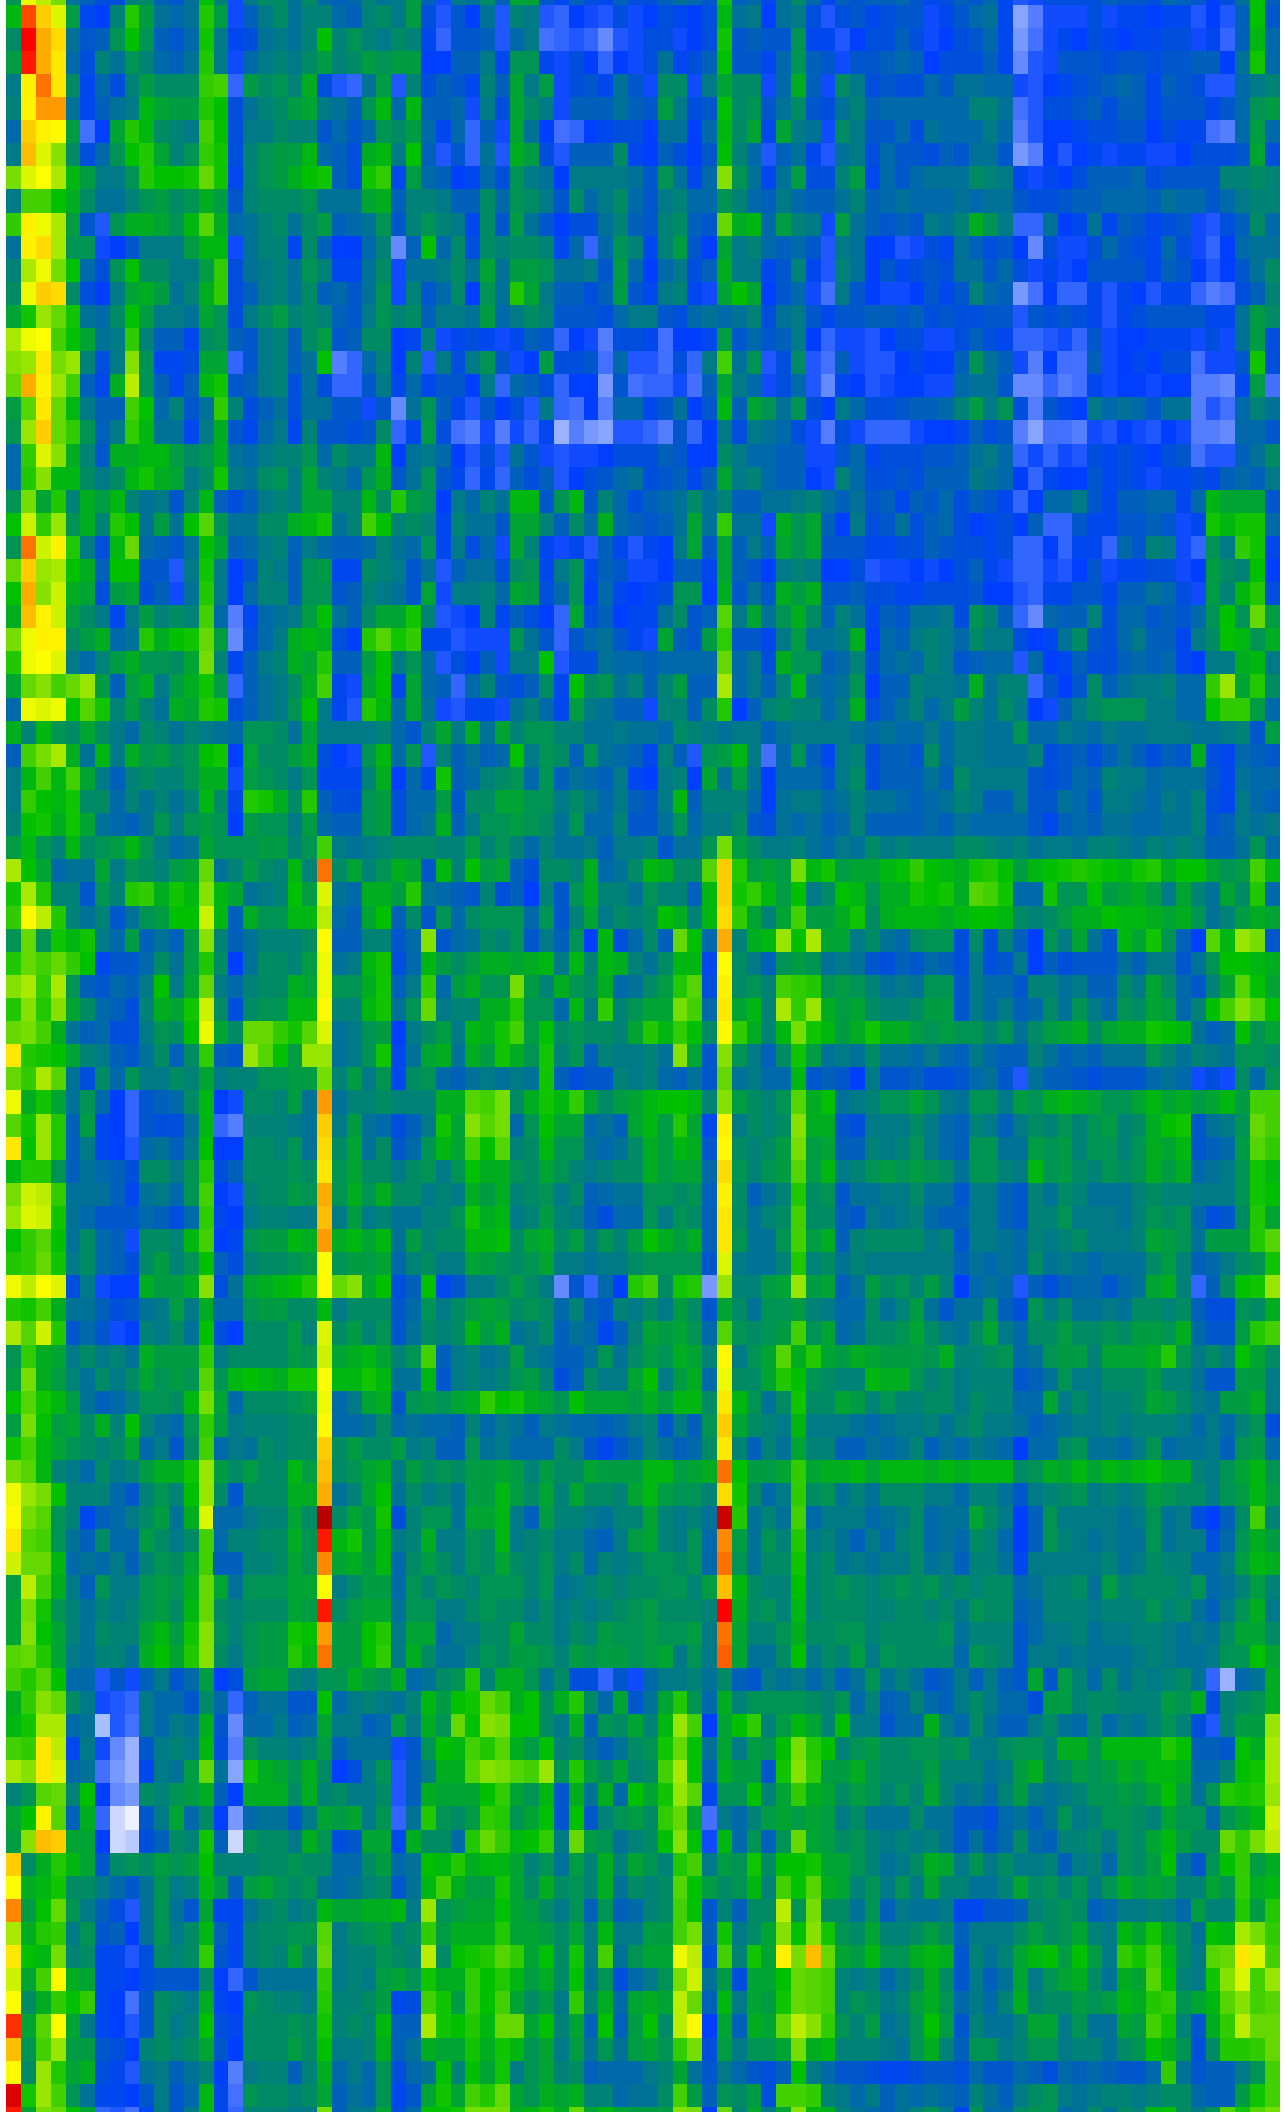

At5g44050  
At3g10720  
At3g58620  
At3g07390  
At3g47380  
At1g10370  
At4g22620  
At3g57460  
At2g30830  
At3g09520  
At1g71100  
At1g16090  
At5g03030  
At1g72000  
At4g14680  
At5g46470  
At4g31780  
At2g33600  
At5g17990  
At1g22900  
At4g30230  
At1g50040  
At5g03720  
At4g38420  
At5g57560  
At1g35140  
At3g54810  
At2g17120  
At5g46710  
At1g74440  
At3g03020  
At5g58840  
At3g56260  
At2g34810  
At1g19640  
At3g11480  
At3g21660  
At3g18710  
At5g46510  
At5g14700  
At1g33760  
At3g12910  
At4g26200  
At4g30430  
At1g08860  
At3g22910  
At5g40180  
At1g14480  
At5g59070  
At4g20000  
At5g52680  
At2g35710  
At2g35710  
At1g76430  
At1g05880  
At4g09570  
At1g76640  
At1g17750  
At1g53080  
At1g60280  
At5g37420  
At3g09870  
At4g08040  
At2g37880  
At5g64870  
At2g36440  
At1g76210  
At2g33710  
At4g18540  
At2g31690  
At1g43000  
At5g60350  
At4g34710  
At1g80610  
At5g22060  
At5g12930  
At1g30620  
At2g25110  
At4g35630  
At4g23460  
At2g21640  
At5g19880  
At3g17110  
At1g69920  
At3g45960  
At2g02800  
At1g43900  
At1g35910  
At5g22570  
At1g19250  
At4g19460

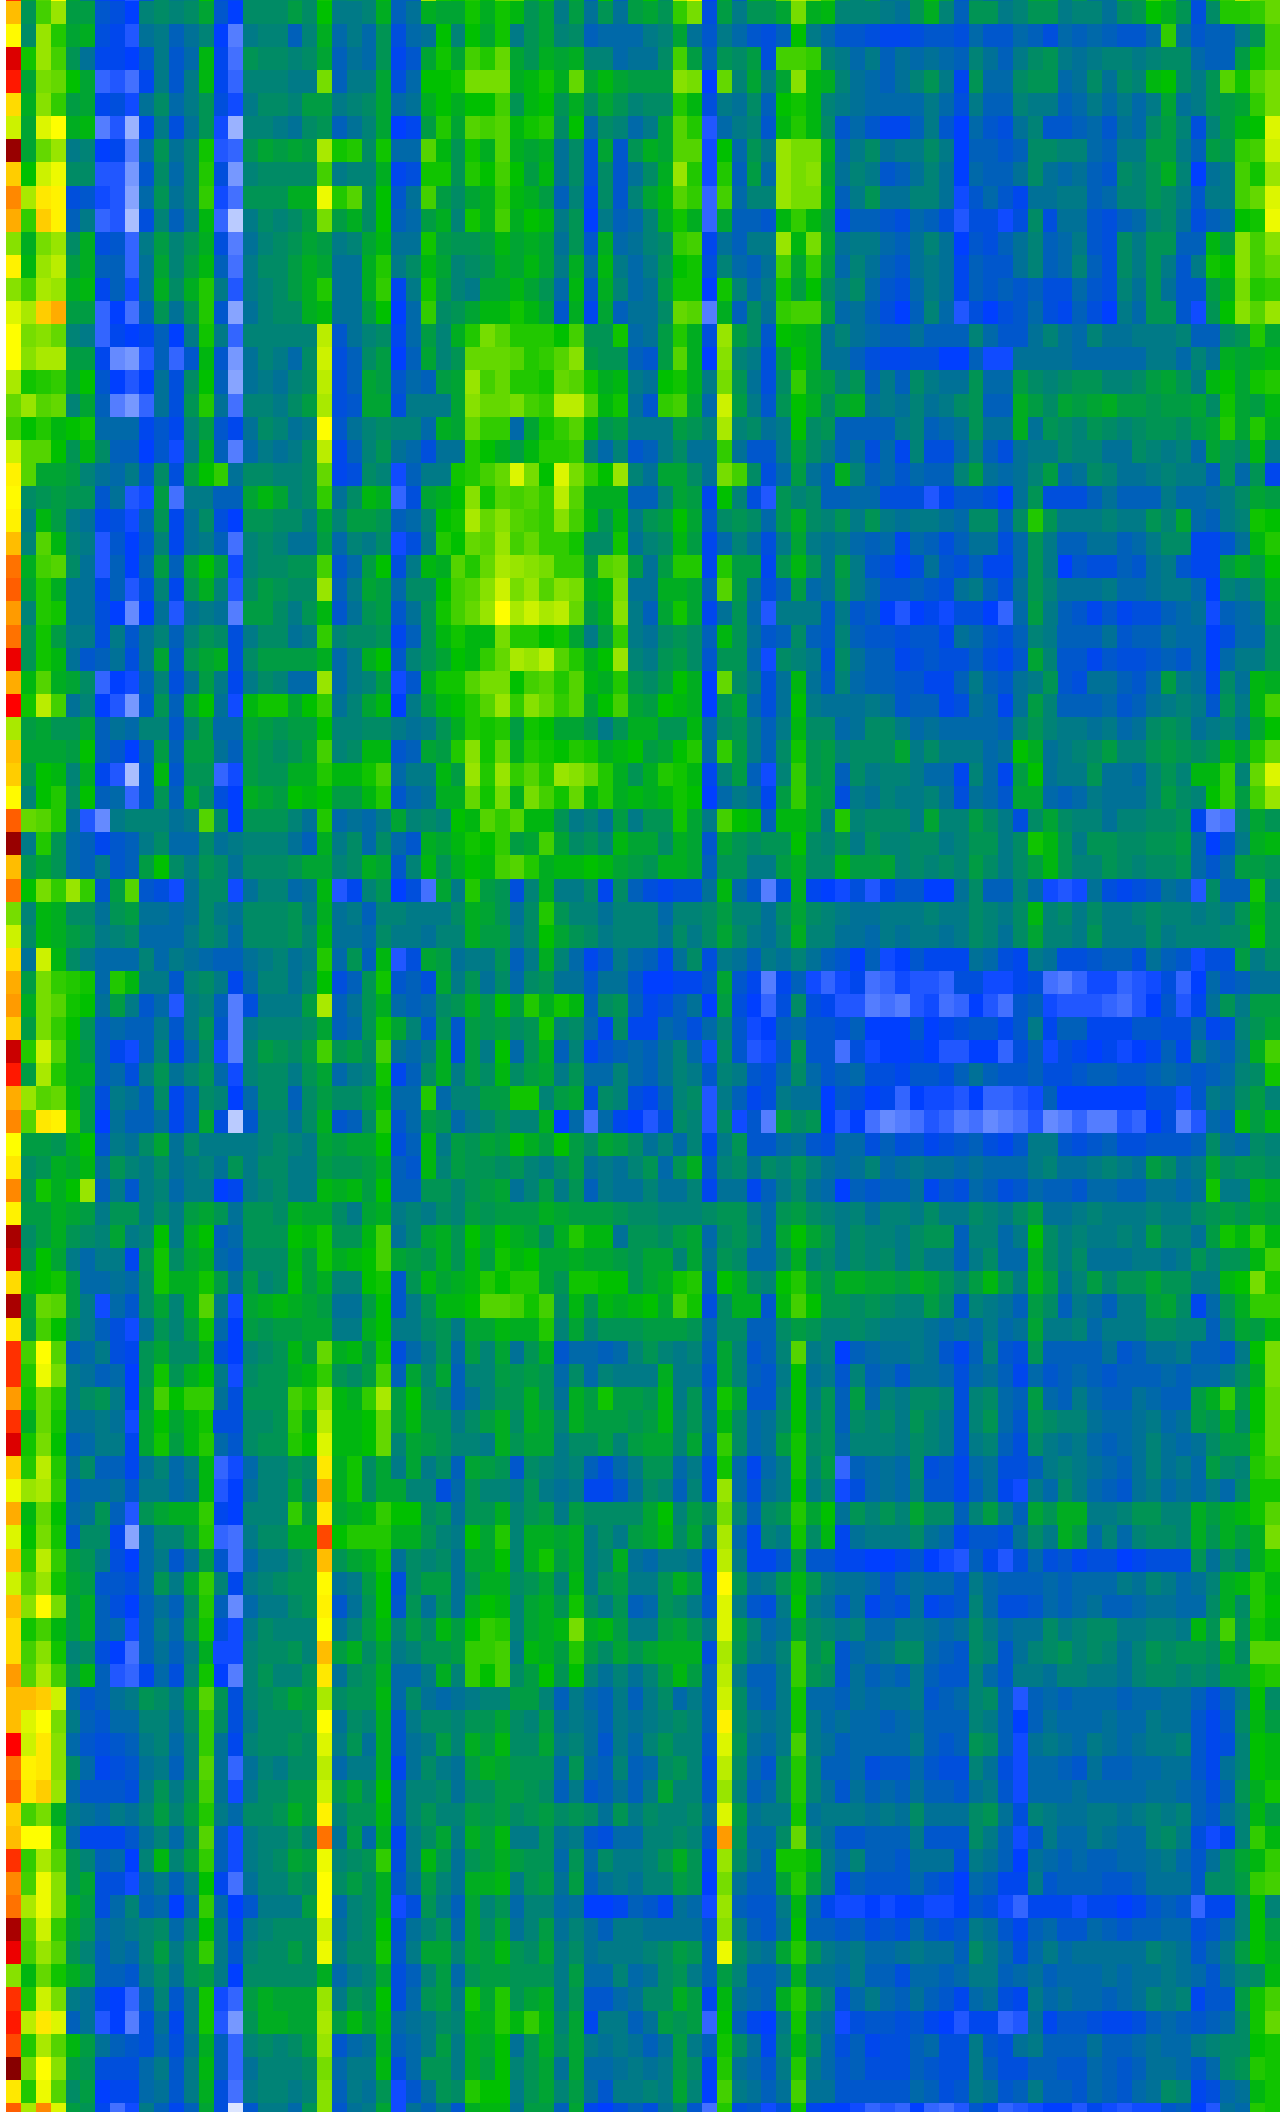

At5g22570  
At1g19250  
At4g19460  
At3g28580  
At5g40990  
At5g13080  
At3g47780  
At5g11210  
At2g47550  
At1g62300  
At2g43000  
At1g67980  
At1g69930  
At3g54150  
At1g61340  
At3g49530  
At1g70740  
At5g24590  
At2g28830  
At4g37260  
At3g50060  
At4g37180  
At3g48510  
At3g53160  
At1g32870  
At1g10170  
At5g05410  
At1g05680  
At3g11020  
At1g61460  
At3g02800  
At2g20150  
At2g28820  
At3g07970  
At3g25510  
At4g27940  
At5g17460  
At2g20170  
At5g46470  
At4g25470  
At4g25490  
At3g26190  
At5g43450  
At3g46600  
At3g14440  
At5g43380  
At1g32350  
At1g36370  
At3g22370  
At5g48850  
At1g12030  
At3g49580  
At5g51990  
At1g31290  
At3g30210  
At1g49520  
At5g49200  
At1g80110  
At5g57500  
At4g11170  
At2g44580  
At2g24130  
At3g14225  
At5g28630  
At5g43890  
At2g26390  
At1g07520  
At5g59450  
At5g24540  
At3g18690  
At3g61630  
At5g28610  
At5g61900  
At1g22810  
At5g24110  
At2g37430  
At5g42380  
At1g14540  
At3g23230  
At4g31950  
At5g57510  
At5g54490  
At1g63750  
At5g66640  
At1g68765  
At2g45760  
At2g25460  
At4g24160  
At4g11280  
At3g50930  
At5g22530  
At3g44400

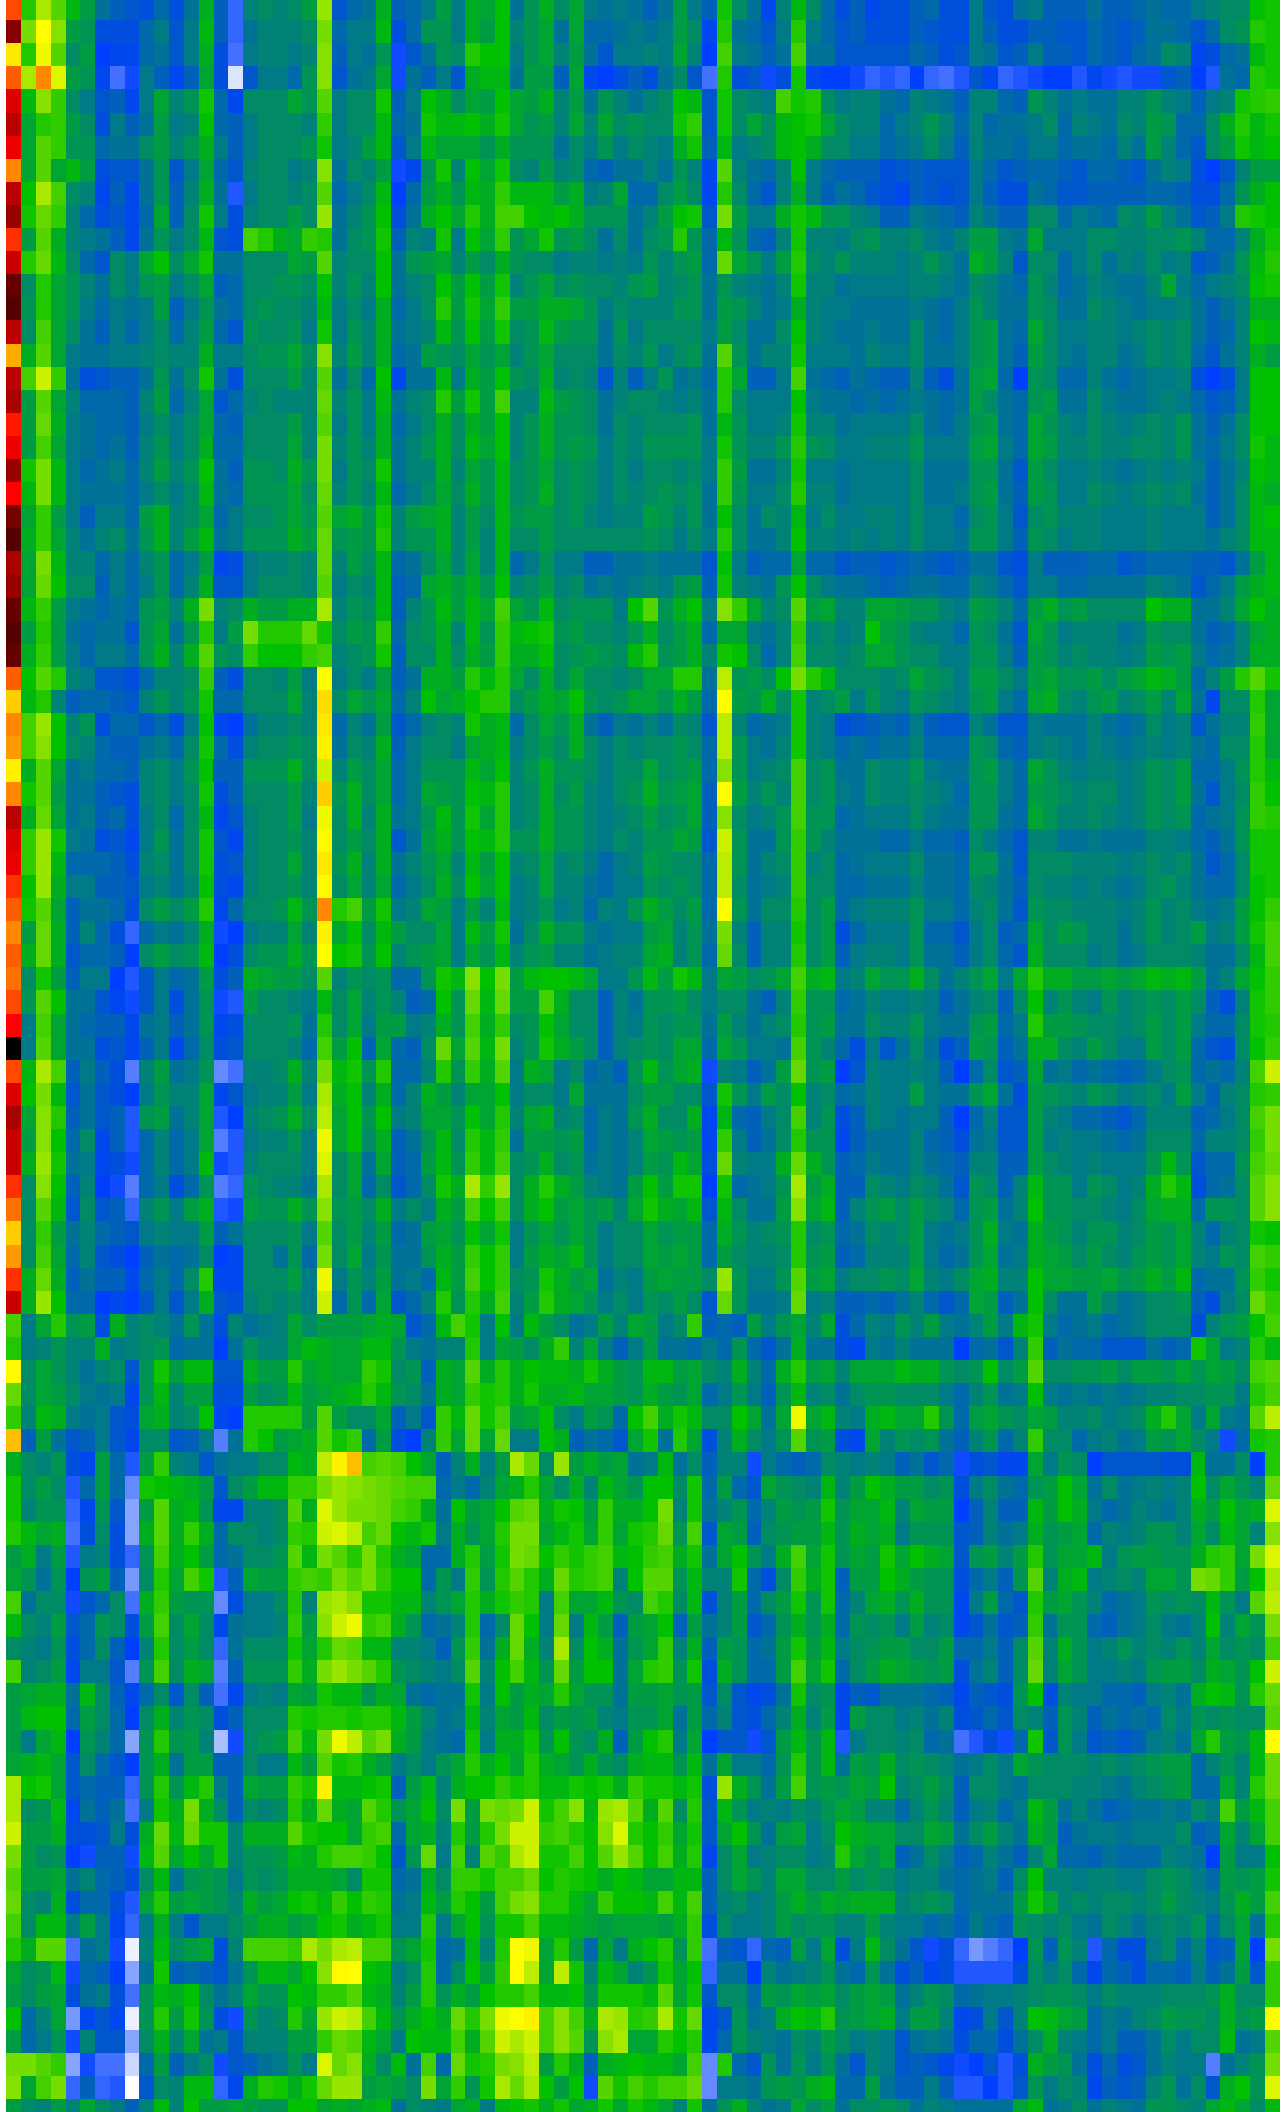

At4g11280  
At3g50930  
At5g22530  
At3g44400  
At3g60120  
At2g04050  
At2g04070  
At1g13310  
At4g37370  
At1g01480  
At3g06490  
At4g16820  
At2g18190  
At4g16680  
At3g63060  
At3g23220  
At3g53600  
At3g54520  
At4g37710  
At2g26380  
At5g52400  
At1g70130  
At2g31860  
At1g21850  
At2g03760  
At2g41730  
At1g74870  
At4g14370  
At1g09930  
At3g17690  
At2g14960  
At4g17490  
At2g44840  
At5g24550  
At5g41550  
At2g32020  
At4g28460  
At1g30370  
At2g23270  
At3g25655  
At2g18210  
At1g14550  
At1g49530  
At1g49450  
At3g22830  
At1g71530  
At3g05390  
At5g19110  
At1g16160  
At5g14730  
At3g25250  
At2g38830  
At2g21900  
At1g32970  
At2g36650  
At4g28703  
At4g11480  
At4g10730  
At4g24430  
At2g18550  
At4g35690  
At3g55700  
At5g47920  
At5g03640  
At5g11290  
At3g15250  
At3g49700  
At3g44730  
At5g47630  
At1g04360  
At1g79330  
At2g23410  
At5g16770  
At3g25855  
At1g53950  
At1g64000  
At1g51480  
At4g03480  
At5g60310  
At1g23450  
At1g55440  
At5g21110  
At2g28700  
At3g04100  
At1g69960  
At1g18940  
At5g17720  
At5g06839  
At5g06330  
At5g40540  
At3g54130  
At2g12345

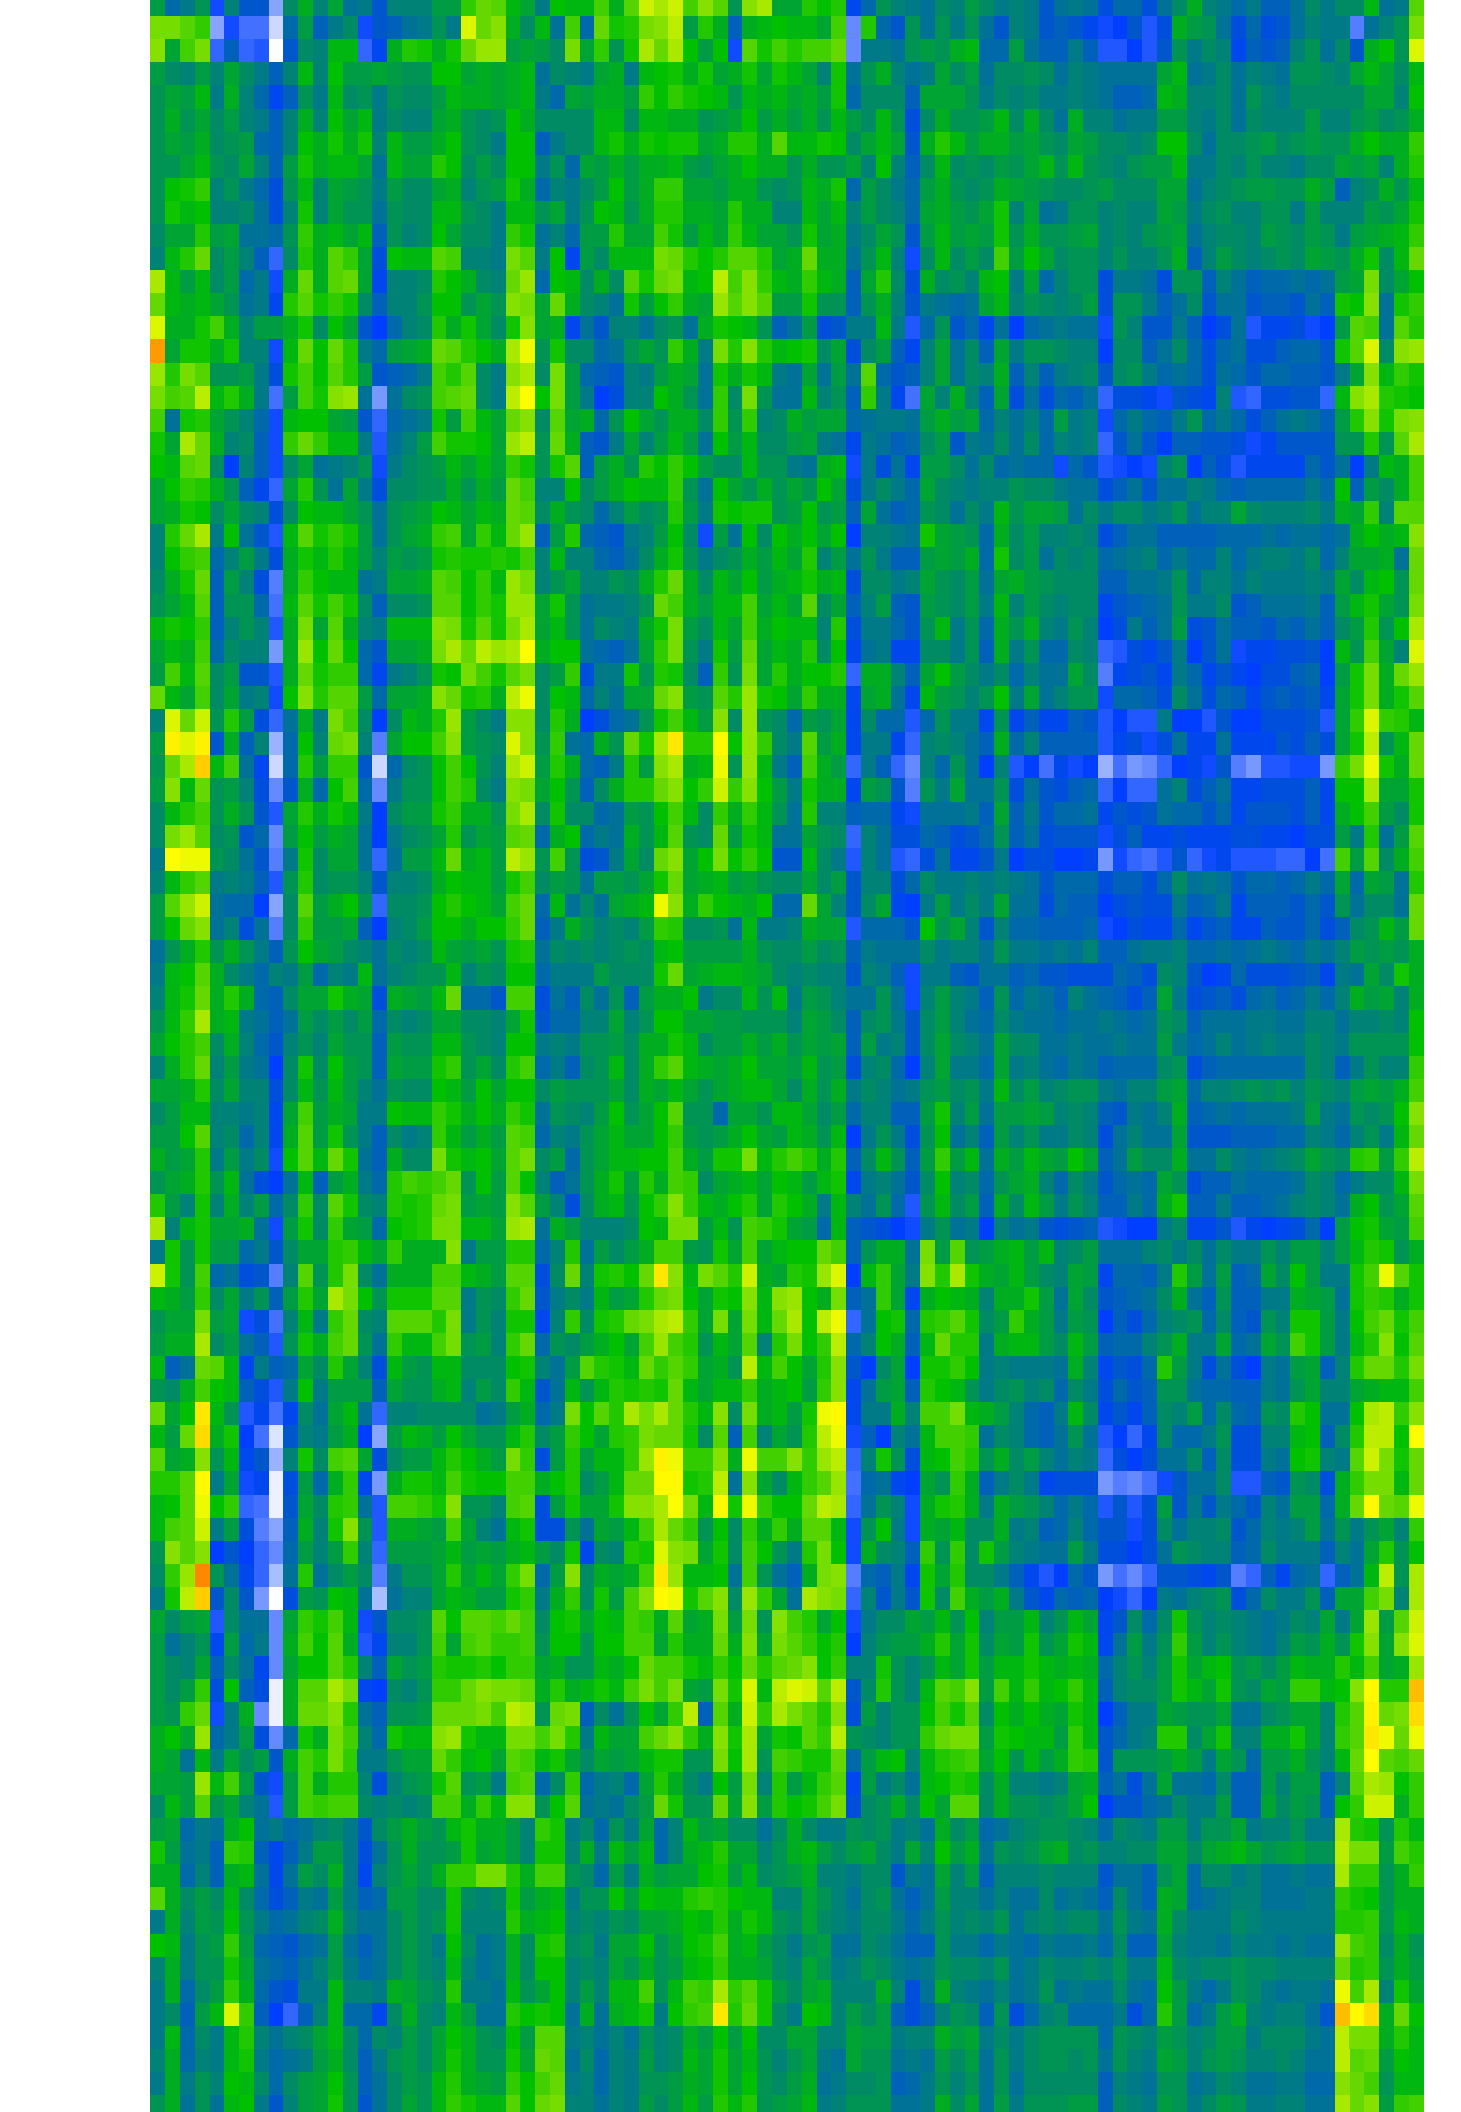

At5g06330  
At5g40540  
At3g54130  
At2g12345  
At5g35920  
At5g59510  
At3g42240  
At5g42955  
At4g07540  
At3g31910  
At3g32020  
At3g32000  
At3g46070  
At4g13480  
At1g50590  
At1g29860  
At1g63740  
At5g64450  
At4g19990  
At4g28710  
At2g41960  
At3g60110  
At5g23000  
At4g08740  
At2g19210  
At4g07430  
At5g23650  
At1g61830  
At1g32950  
At4g21700  
At2g27270  
At1g73190  
At1g15800  
At3g29170  
At3g19240  
At1g12190  
At4g15280  
At1g04100  
At3g42190  
At2g38490  
At2g32660  
At1g35030  
At2g24010  
At4g01420  
At5g30440  
At3g43990  
At2g11590  
At4g08560  
At2g11270  
At5g28170  
At1g22210  
At1g17000  
At4g32375  
At2g43700  
At1g12490  
At5g24600  
At1g19030  
At5g66970  
At4g13700  
At2g41790  
At4g07970  
At2g02730  
At2g01650  
At1g34180  
At3g17710  
At5g55560  
At5g52200  
At5g42570  
At5g44240  
At2g45140  
At1g79580  
At3g20840  
At4g19480  
At2g35736  
At2g28360  
At5g24710  
At5g24510  
At4g17660  
At3g04660  
At5g01190  
At1g75590  
At1g08340  
At4g22680  
At4g28380  
At1g07120  
At1g22480  
At2g46770  
At4g22160  
At5g60490  
At5g03160  
At2g41610  
At1g27440

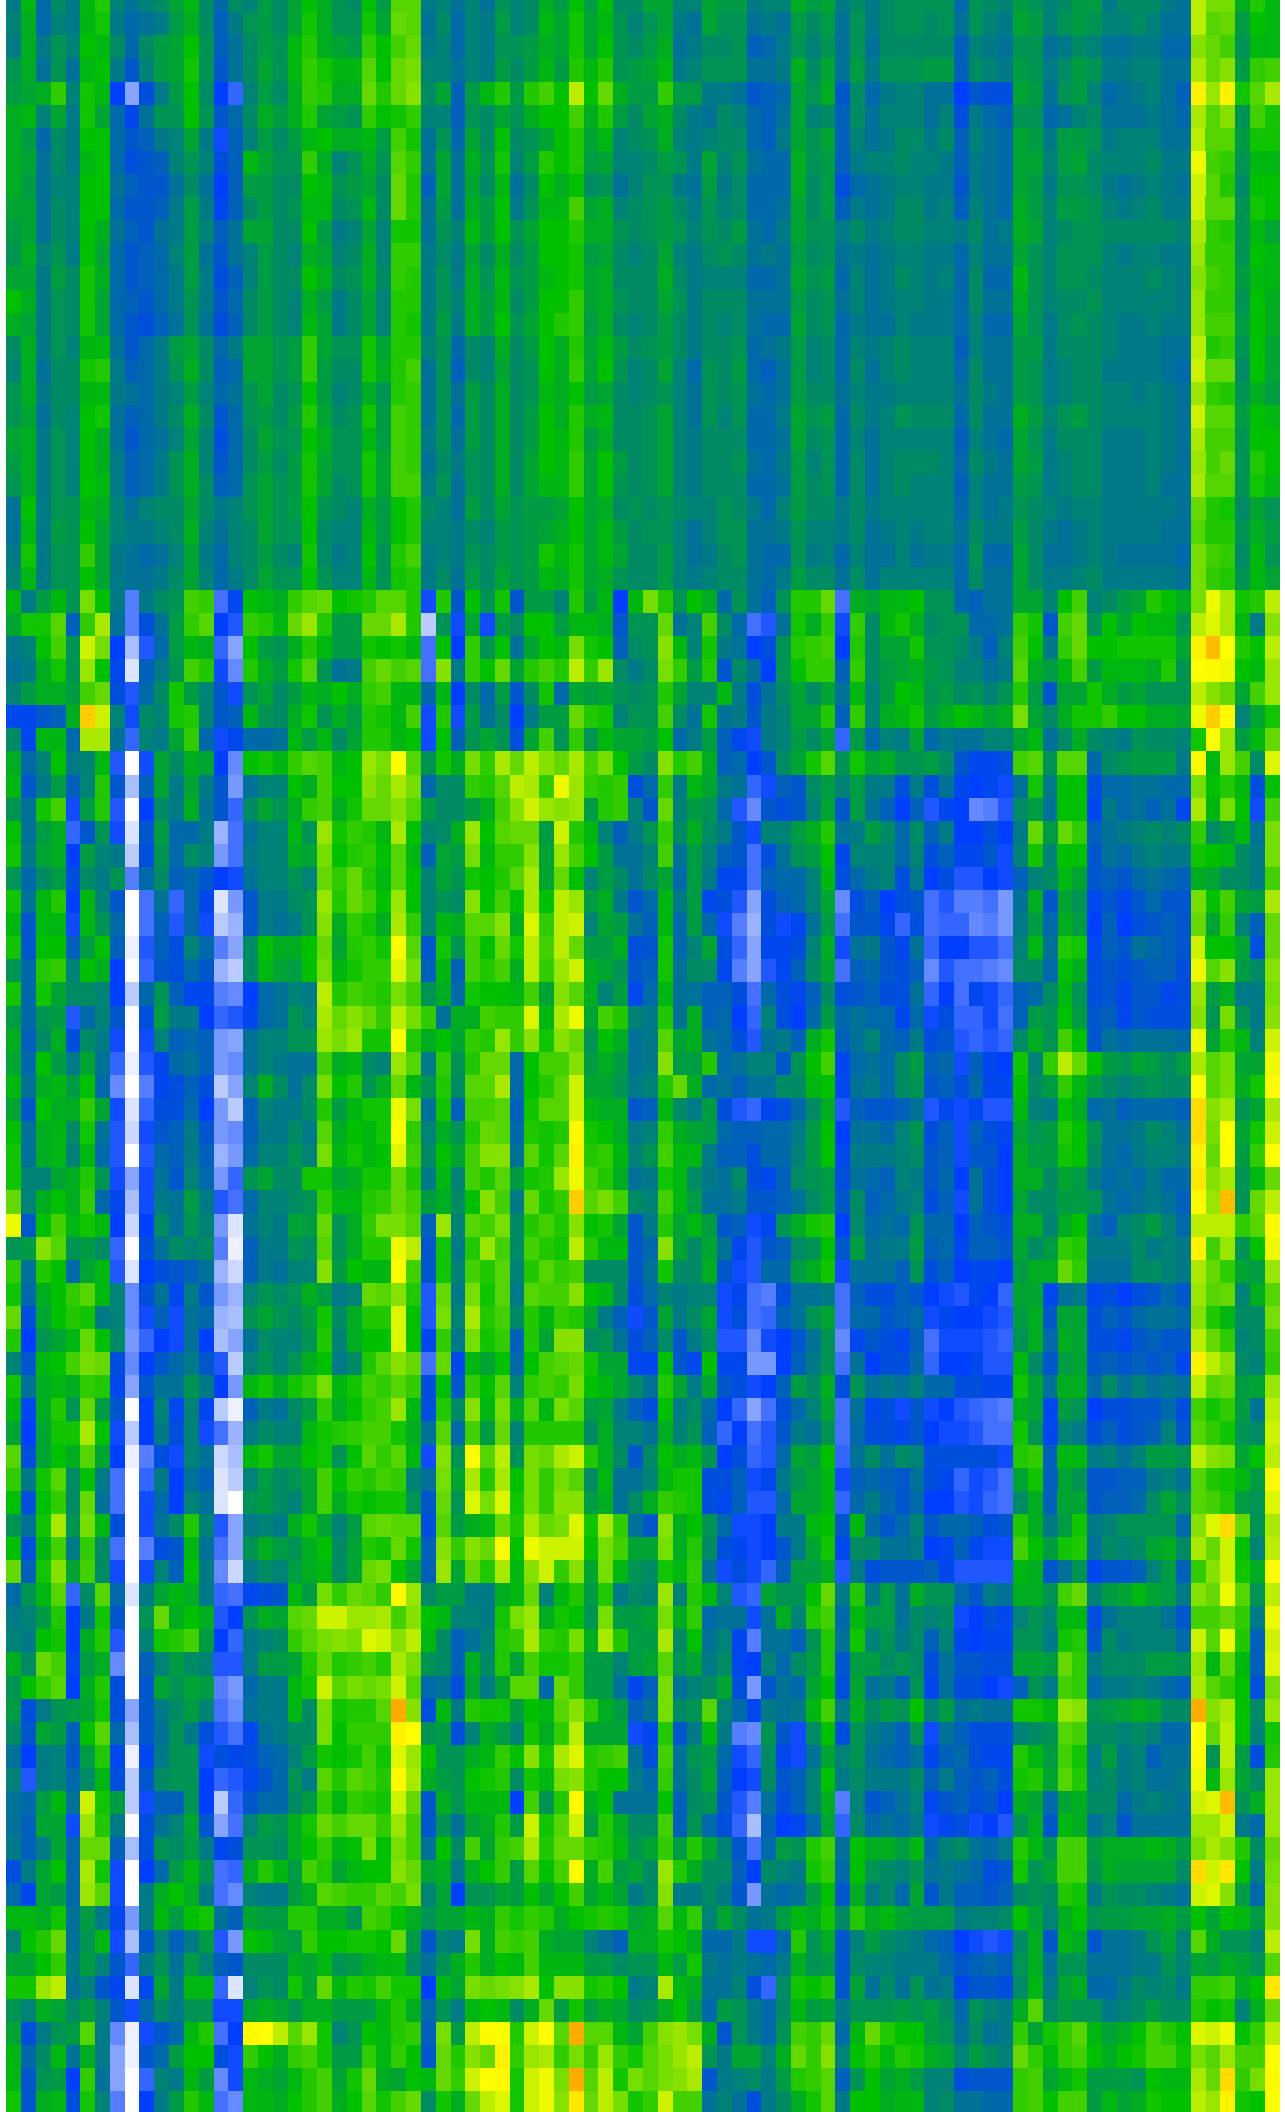

At3g06490  
At5g03160  
At2g41610  
At1g27440  
At5g46340  
At5g05390  
At2g37090  
At2g38080  
At3g62020  
At4g18770  
At4g28500  
At2g29130  
At1g27380  
At3g50220  
At3g16920  
At1g09610  
At4g27435  
At3g18660  
At5g44030  
At5g54690  
At5g17410  
At5g15630  
At1g63910  
At1g32770  
At2g31930  
At3g15050  
At4g29530  
At1g17730  
At1g23260  
At3g21610  
At3g12740  
At5g48810  
At2g37680  
At5g35980  
At5g01990  
At5g46860  
At1g17060  
At3g20340  
At4g20820  
At1g60140  
At3g48530  
At1g24440  
At5g18120  
At5g40470  
At1g75540  
At1g15100  
At4g32860  
At1g44800  
At3g63210  
At1g27030  
At4g14465  
At1g62990  
At1g10480  
At5g22850  
At1g21200  
At2g36410  
At1g28260  
At4g38060  
At1g21920  
At5g02560  
At4g17350  
At3g56310  
At3g59950  
At3g49590  
At5g63970  
At4g21980  
At3g54840  
At5g61500  
At1g68820  
At3g09740  
At5g19050  
At5g02040  
At4g12230  
At2g31090  
At2g45720  
At3g09470  
At4g38640  
At5g03280  
At3g55770  
At1g14400  
At3g51040  
At3g52560  
At3g14430  
At3g14250  
At1g03350  
At5g26140  
At3g60680  
At4g22270  
At2g17990  
At3g56740  
At3g51400  
At4g04860

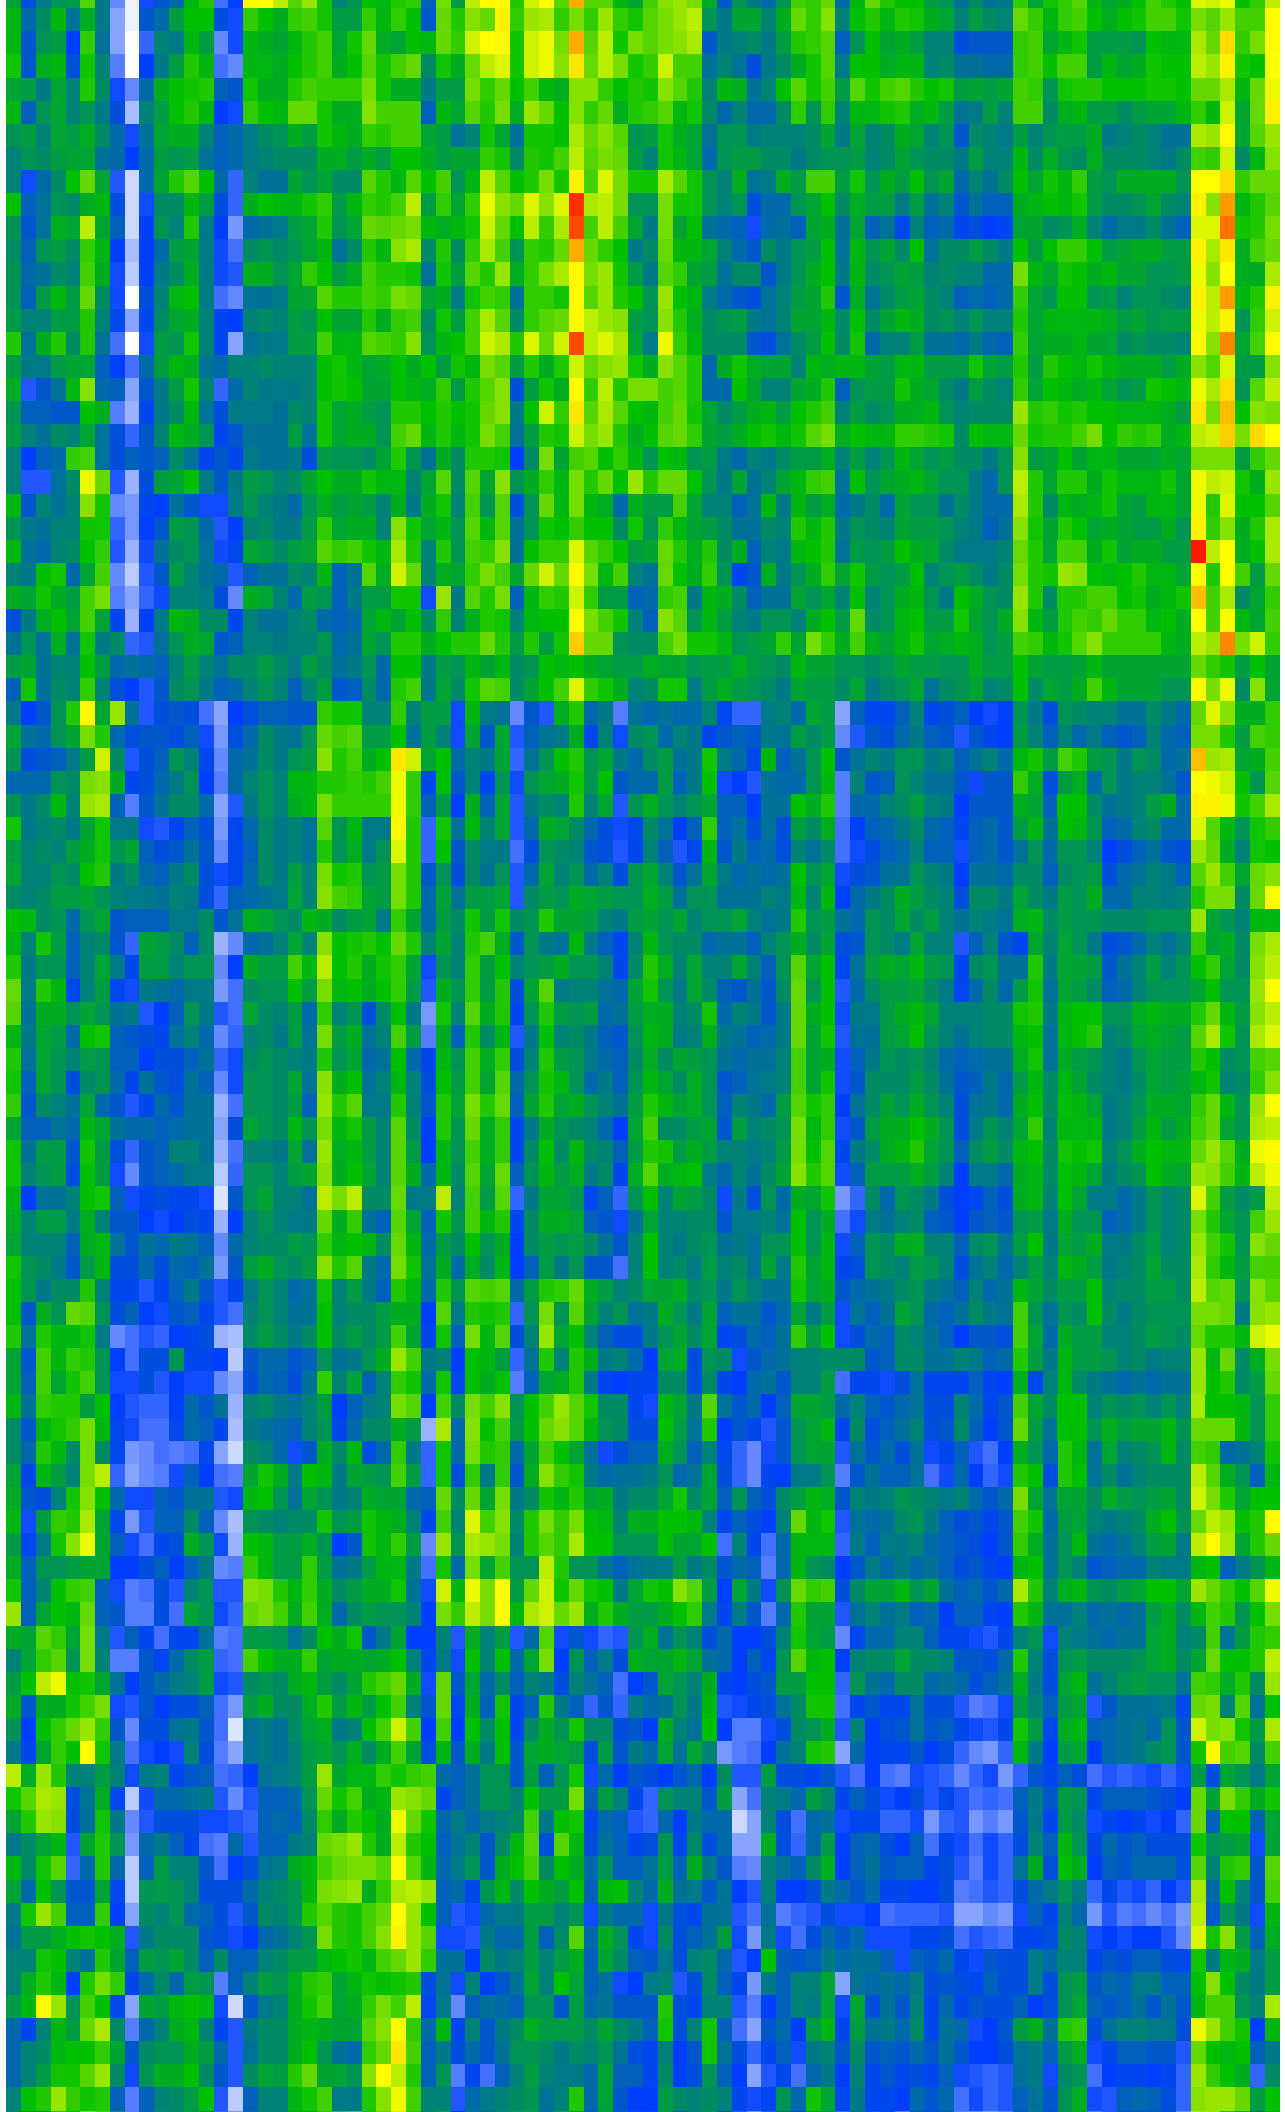

At3g56740  
At3g51400  
At4g04860  
At3g18300  
At3g59770  
At1g33440  
At4g36060  
At2g39630  
At3g54860  
At5g14390  
At5g46150  
At5g50400  
At1g05570  
At3g48185  
At4g40050  
At1g01380  
At1g28120  
At1g31850  
At4g32880  
At4g17770  
At4g22150  
At1g55840  
At4g36890  
At2g38090  
At5g41260  
At1g67560  
At5g55530  
At1g14890  
At1g80170  
At5g59305  
At1g70660  
At3g07340  
At2g38120  
At3g06590  
At5g01970  
At1g20850  
At1g43790  
At5g26330  
At3g53100  
At1g27920  
At5g04890  
At5g37180  
At1g13920  
At5g48060  
At1g63310  
At3g10680  
At1g61760  
At1g23530  
At1g47410  
At3g17380  
At2g28760  
At1g77020  
At1g58370  
At5g14510  
At5g59290  
At1g79620  
At2g28810  
At4g00440  
At2g41900  
At1g58110  
At3g16090  
At3g05010  
At2g29700  
At4g20410  
At3g20100  
At1g34120  
At4g27040  
At2g16990  
At3g51630  
At4g26180  
At5g12140  
At5g39570  
At1g60440  
At2g22970  
At4g19670  
At5g08290  
At4g36780  
At3g51550  
At4g18710  
At5g65430  
At5g14540  
At4g23640  
At3g59360  
At3g63260  
At5g41940  
At3g15630  
At3g12040  
At1g36380  
At5g53870  
At1g55265  
At2g43290



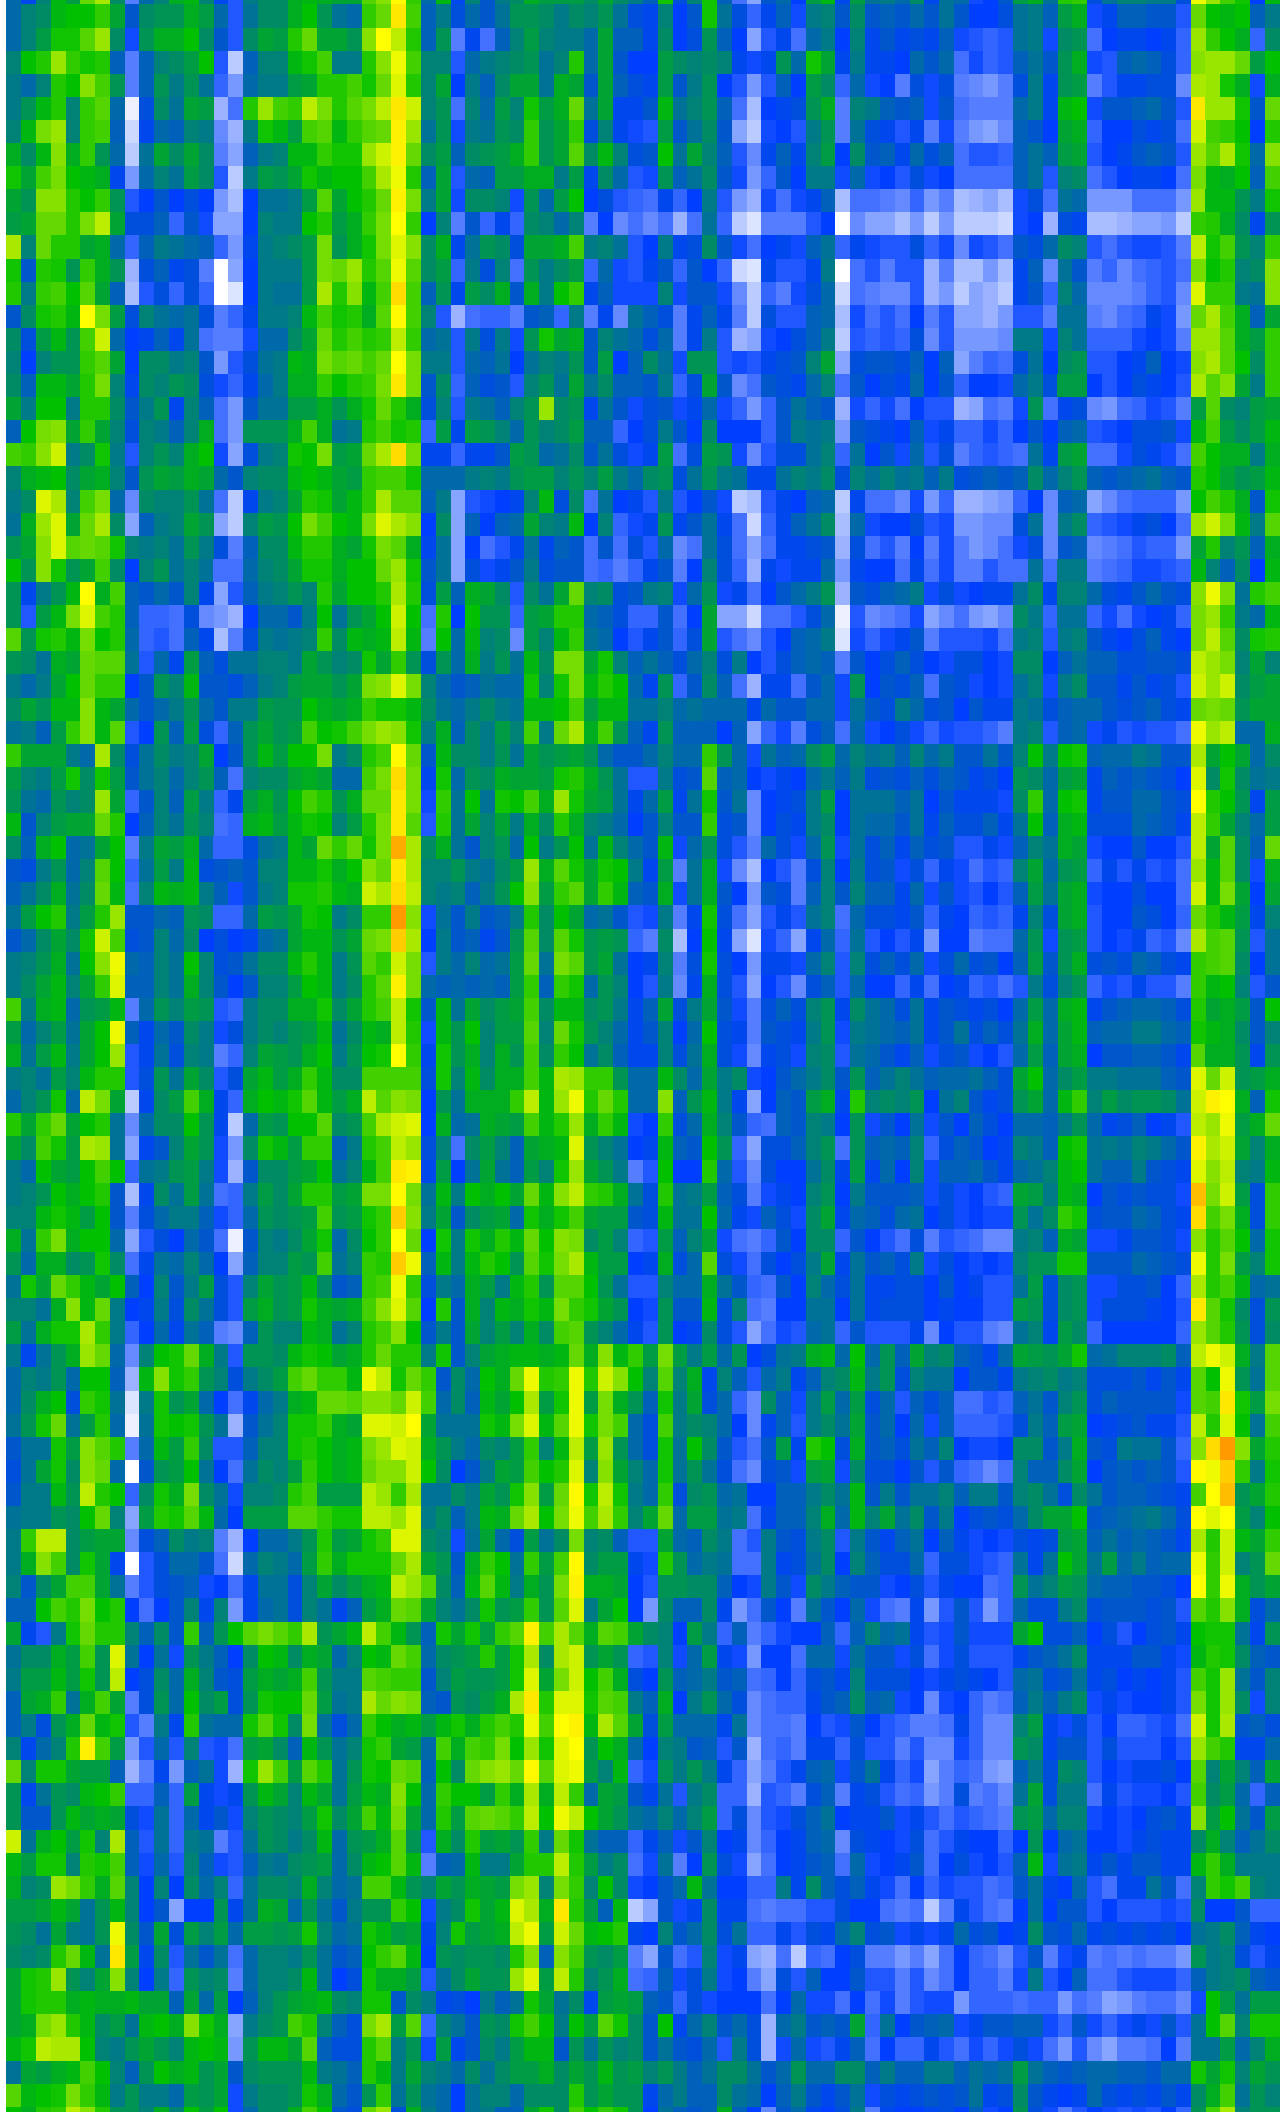

At5g53870  
At1g55265  
At2g43290  
At2g24040  
At5g01800  
At1g79590  
At3g48020  
At2g39050  
At3g57410  
At4g20260  
At2g20950  
At3g30390  
At5g07220  
At2g34585  
At1g72160  
At3g51520  
At3g43670  
At3g05880  
At4g11830  
At3g54200  
At5g37970  
At4g02370  
At2g15570  
At4g02075  
At3g60130  
At3g21260  
At2g25070  
At3g04730  
At1g13700  
At5g03230  
At1g49210  
At2g28200  
At3g15540  
At3g46450  
At3g10740  
At1g22640  
At3g27390  
At1g71980  
At5g66160  
At3g61060  
At2g20230  
At5g21170  
At3g49790  
At3g60140  
At1g03090  
At3g45300  
At1g76410  
At3g11530  
At2g23780  
At5g64880  
At2g28370  
At2g17710  
At4g08300  
At1g44770  
At1g76460  
At1g69570  
At5g23750  
At2g43060  
At3g44280  
At5g62900  
At3g04870  
At3g61790  
At1g36980  
At4g02080  
At3g62290  
At3g03180  
At1g76920  
At5g10960  
At2g03890  
At2g21950  
At3g26890  
At2g39570  
At1g10090  
At1g06060  
At1g12780  
At3g62650  
At3g15070  
At3g51840  
At4g35780  
At5g49450  
At5g60680  
At5g18630  
At1g32400  
At3g47340  
At1g06560  
At2g18700  
At1g33340  
At5g07710  
At5g04920  
At1g66960  
At1g74930

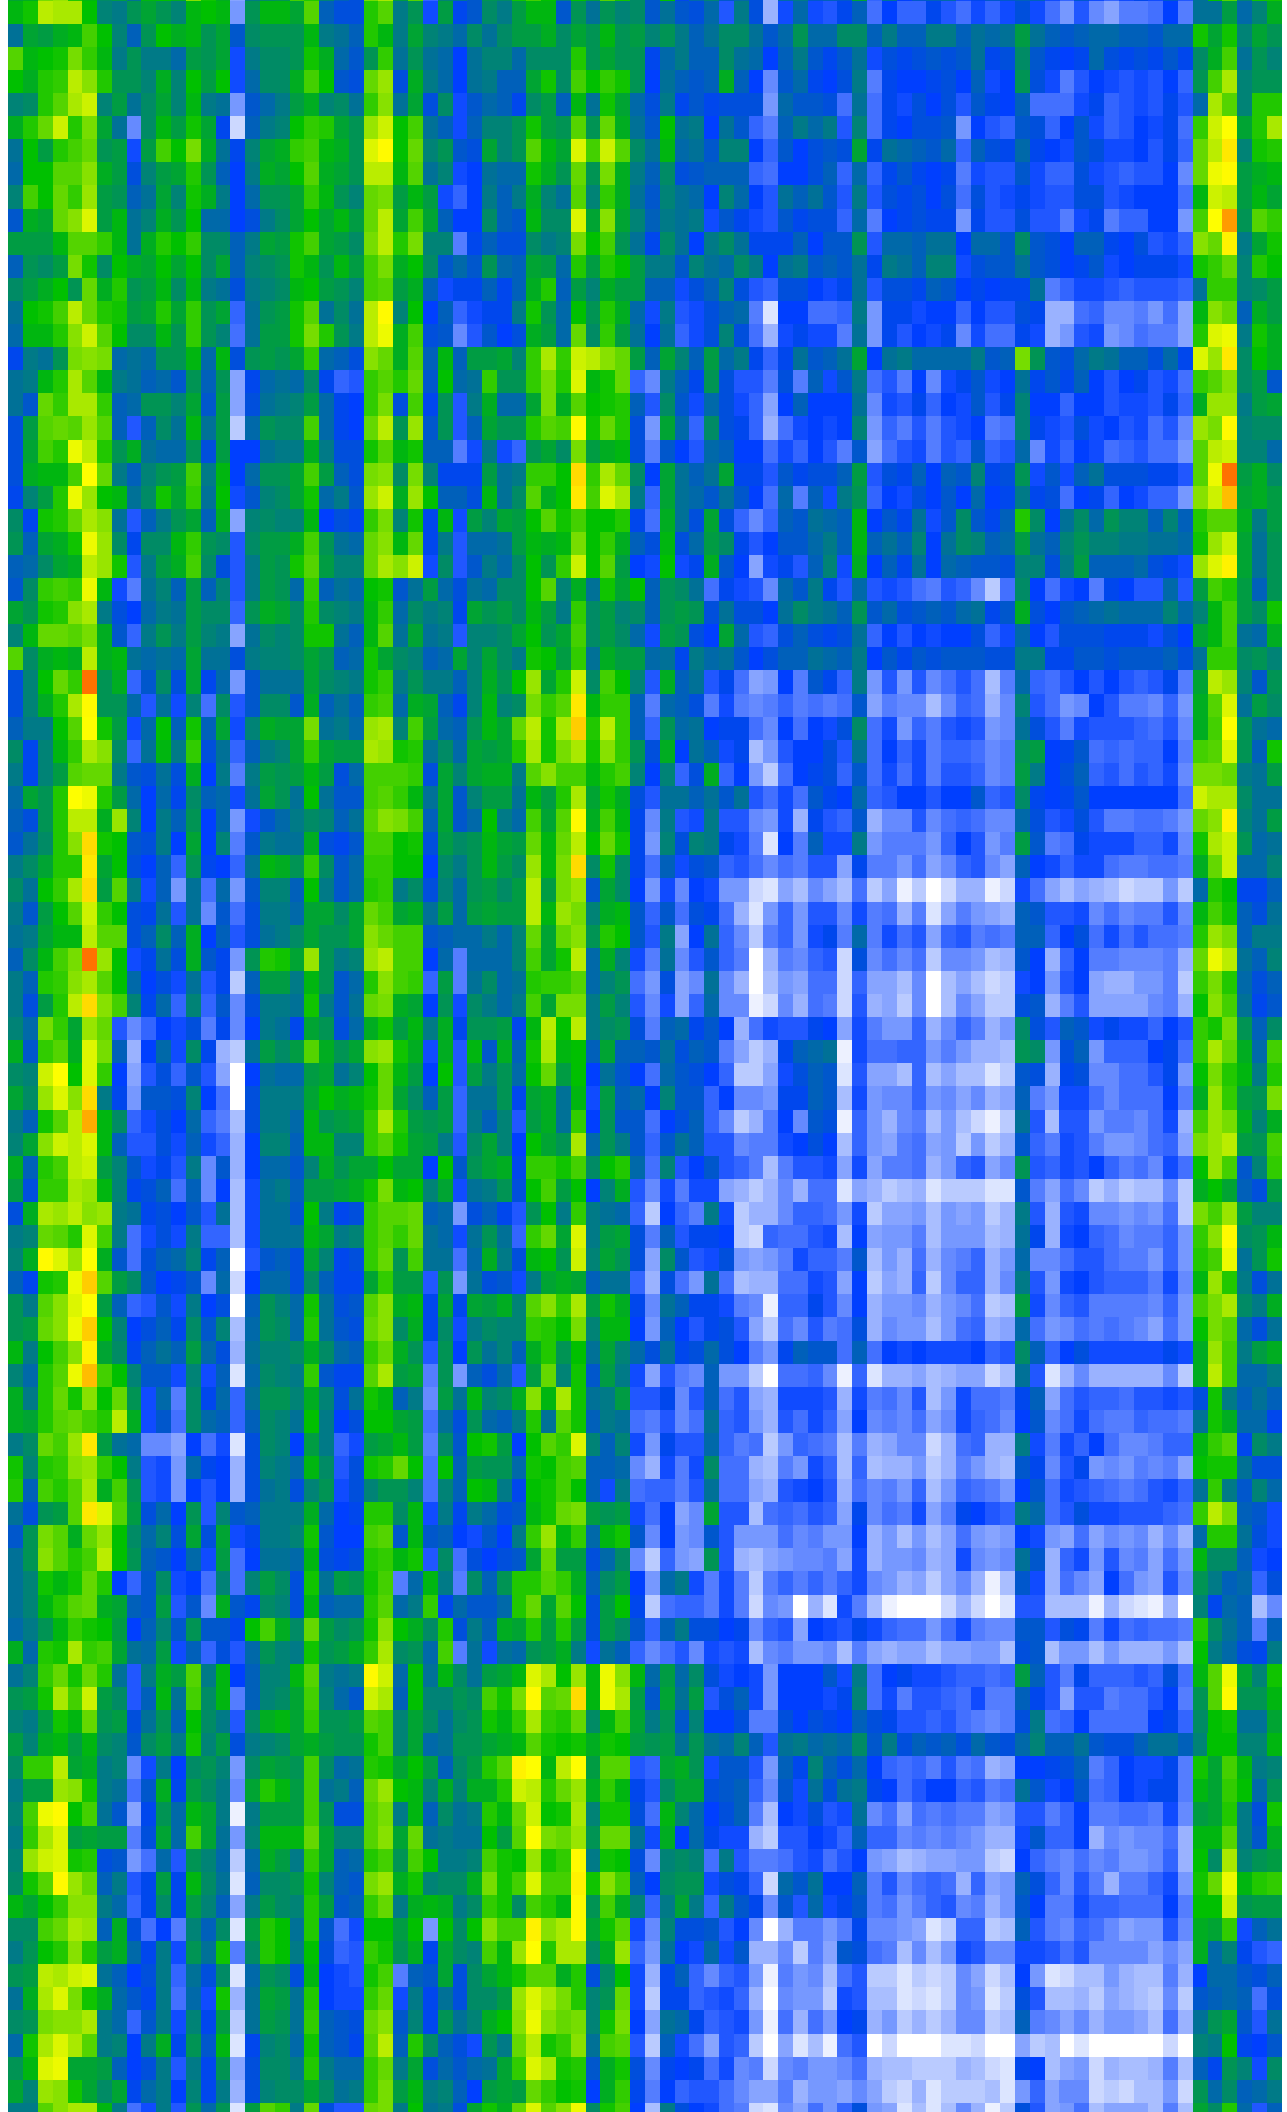

At5g04920  
At1g66960  
At1g74930  
At4g36550  
At3g51960  
At5g62770  
At4g32810  
At2g31120  
At2g01300  
At2g37340  
At2g33170  
At5g16530  
At3g60520  
At3g12730  
At2g20500  
At1g57870  
At5g56520  
At1g74690  
At1g07230  
At5g07580  
At5g18210  
At1g51550  
At1g70160  
At4g26160  
At4g22750  
At5g54760  
At3g01080  
At3g12830  
At4g16780  
At4g10100  
At1g48310  
At1g08460  
At5g64500  
At5g65480  
At4g19420  
At4g39100  
At3g62560  
At1g64230  
At1g80180  
At1g63800  
At4g28220  
At1g26670  
At2g20740  
At4g16520  
At3g50500  
At4g39090  
At3g46000  
At4g05590  
At1g78670  
At5g40450  
At1g22050  
At1g80310  
At2g35050  
At4g05150  
At3g55830  
At5g19590  
At4g32930  
At3g03870  
At4g23880  
At4g16190  
At1g80920  
At1g70290  
At5g41700  
At5g25280  
At4g05070  
At1g56220  
At2g15890  
At1g04400  
At1g18720  
At5g14780  
At4g08290  
At4g36400  
At1g28320  
At3g05250  
At1g65350  
At5g03980  
At2g28120  
At3g17000  
At4g30390  
At2g24240  
At1g50640  
At2g40810  
At1g72800  
At1g21760  
At5g05930  
At1g13990  
At1g54130  
At5g18130  
At3g01170  
At1g34220  
At5g56180  
At4g23220

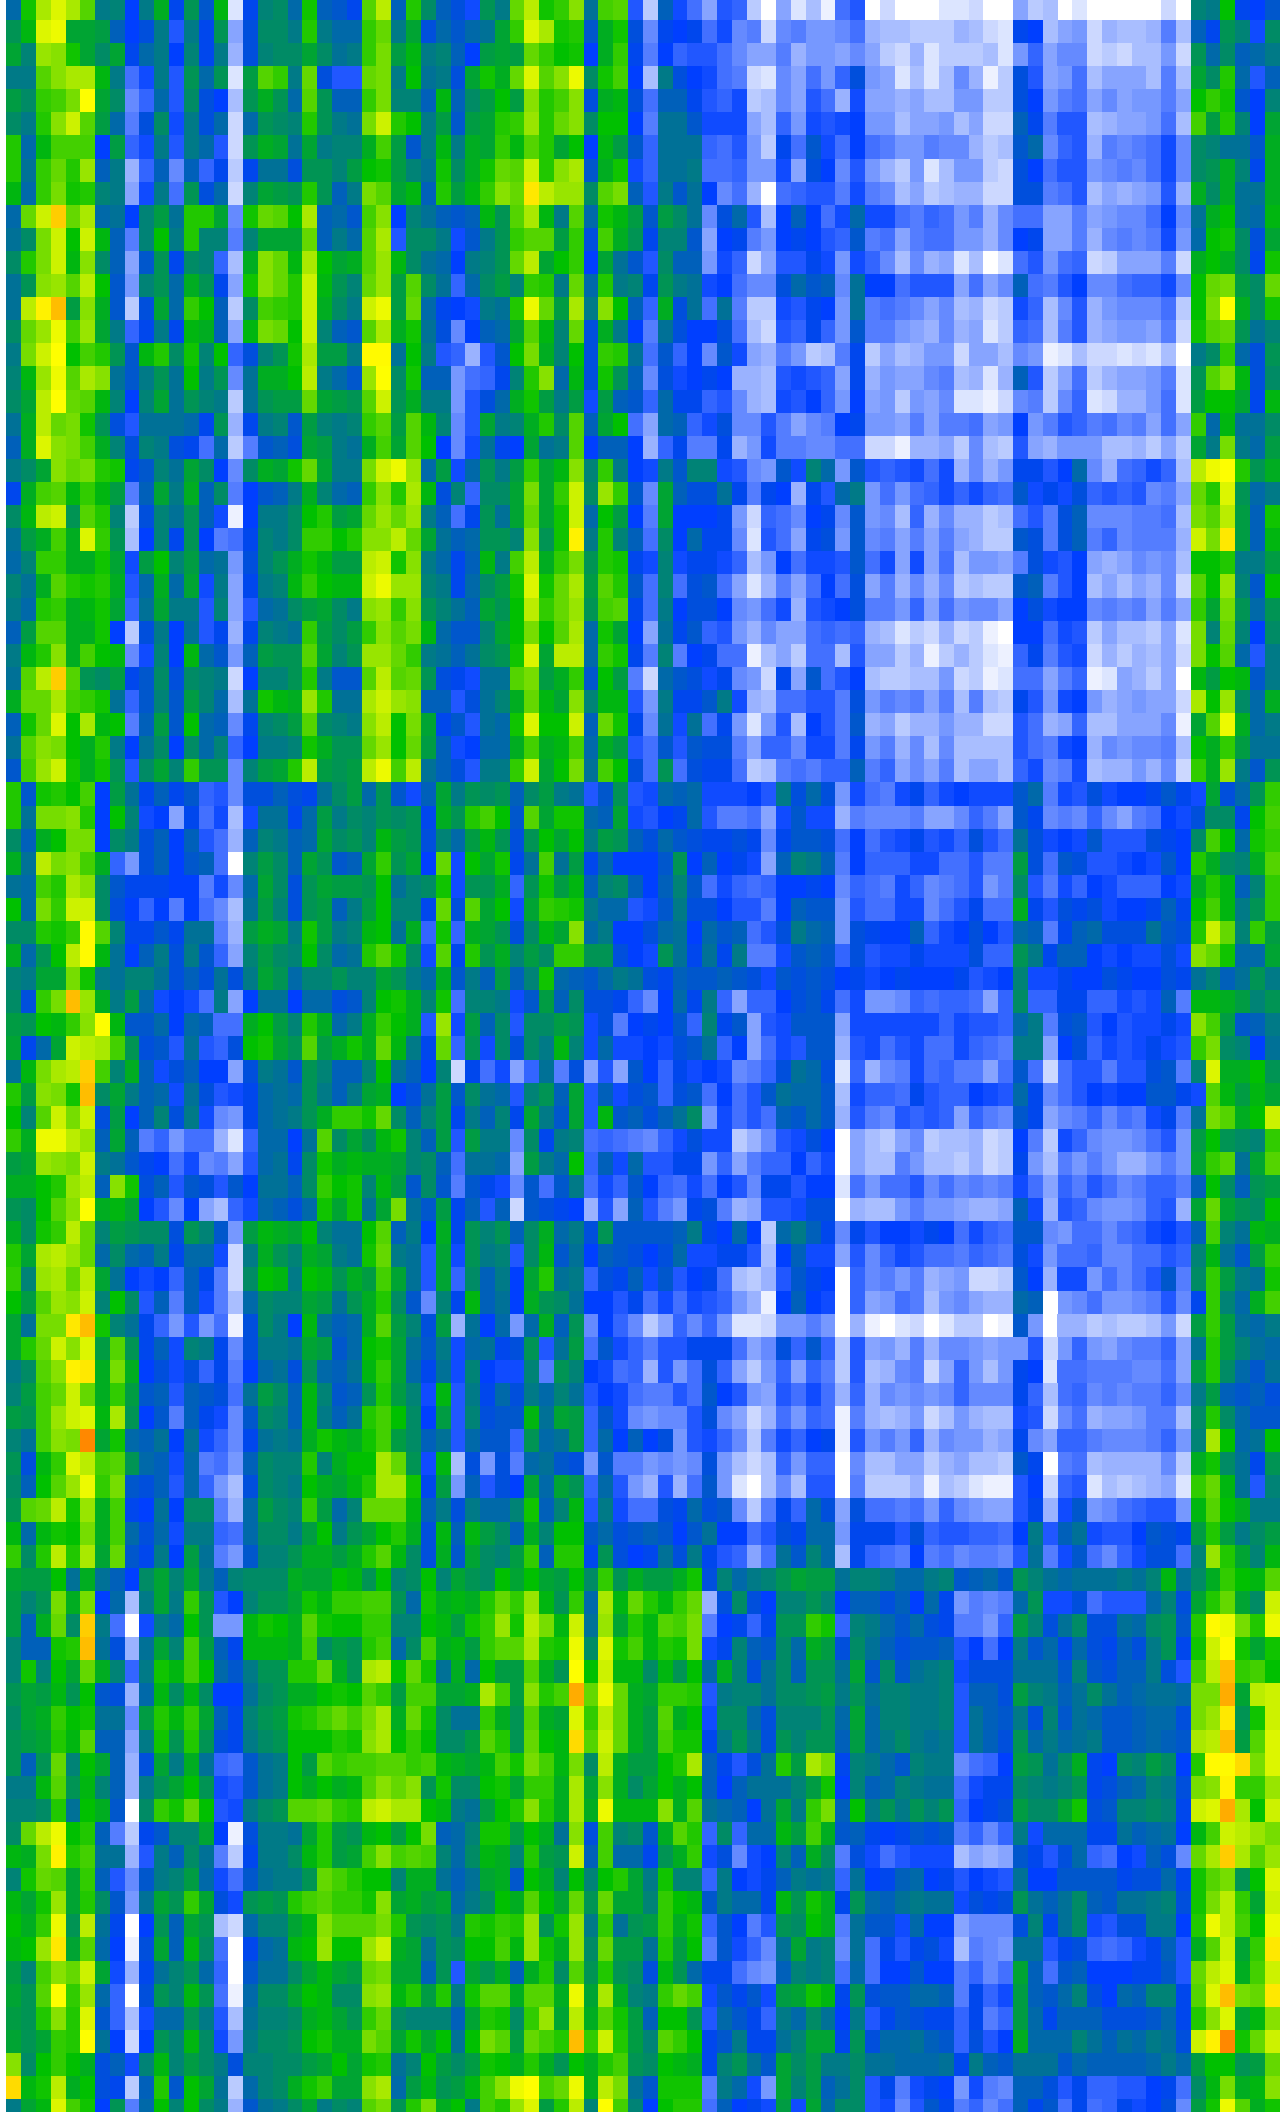

At1g34220  
At5g56180  
At4g03030  
At2g27830  
At4g39140  
At5g61820  
At2g01490  
At5g56180  
At1g29060  
At2g16710  
At5g55850  
At4g38250  
At1g73040  
At4g19200  
At2g36680  
At3g23280  
At5g53330  
At4g38360  
At3g46510  
At5g18850  
At3g01340  
At5g22360  
At3g01520  
At1g47310  
At1g03380  
At5g27320  
At5g42090  
At1g27290  
At3g54140  
At5g13810  
At2g45980  
At4g25770  
At4g37880  
At1g78380  
At4g24020  
At5g43150  
At4g28570  
At1g49470  
At1g62200  
At4g30550  
At2g33480  
At1g57590  
At2g01680  
At4g09460  
At2g46030  
At5g59890  
At1g25275  
At5g13180  
At3g55960  
At3g11280  
At3g19030  
At4g29350  
At1g51340  
At5g04980  
At2g19830  
At1g07600  
At5g60360  
At3g15770  
At1g01490  
At3g15760  
At1g58180  
At5g66490  
At1g47128  
At3g51730  
At4g30270  
At5g51390  
At2g45170  
At5g51580  
At1g15860  
At5g03460  
At5g42850  
At5g02200  
At4g39720  
At5g56200  
At4g20240  
At5g18680  
At5g43670  
At2g22570  
At4g02600  
At1g69850  
At5g07460  
At1g09390  
At5g63905  
At3g27560  
At2g26600  
At5g18780  
At3g27210  
At3g50810  
At2g29150  
At1g69790  
At2g46080

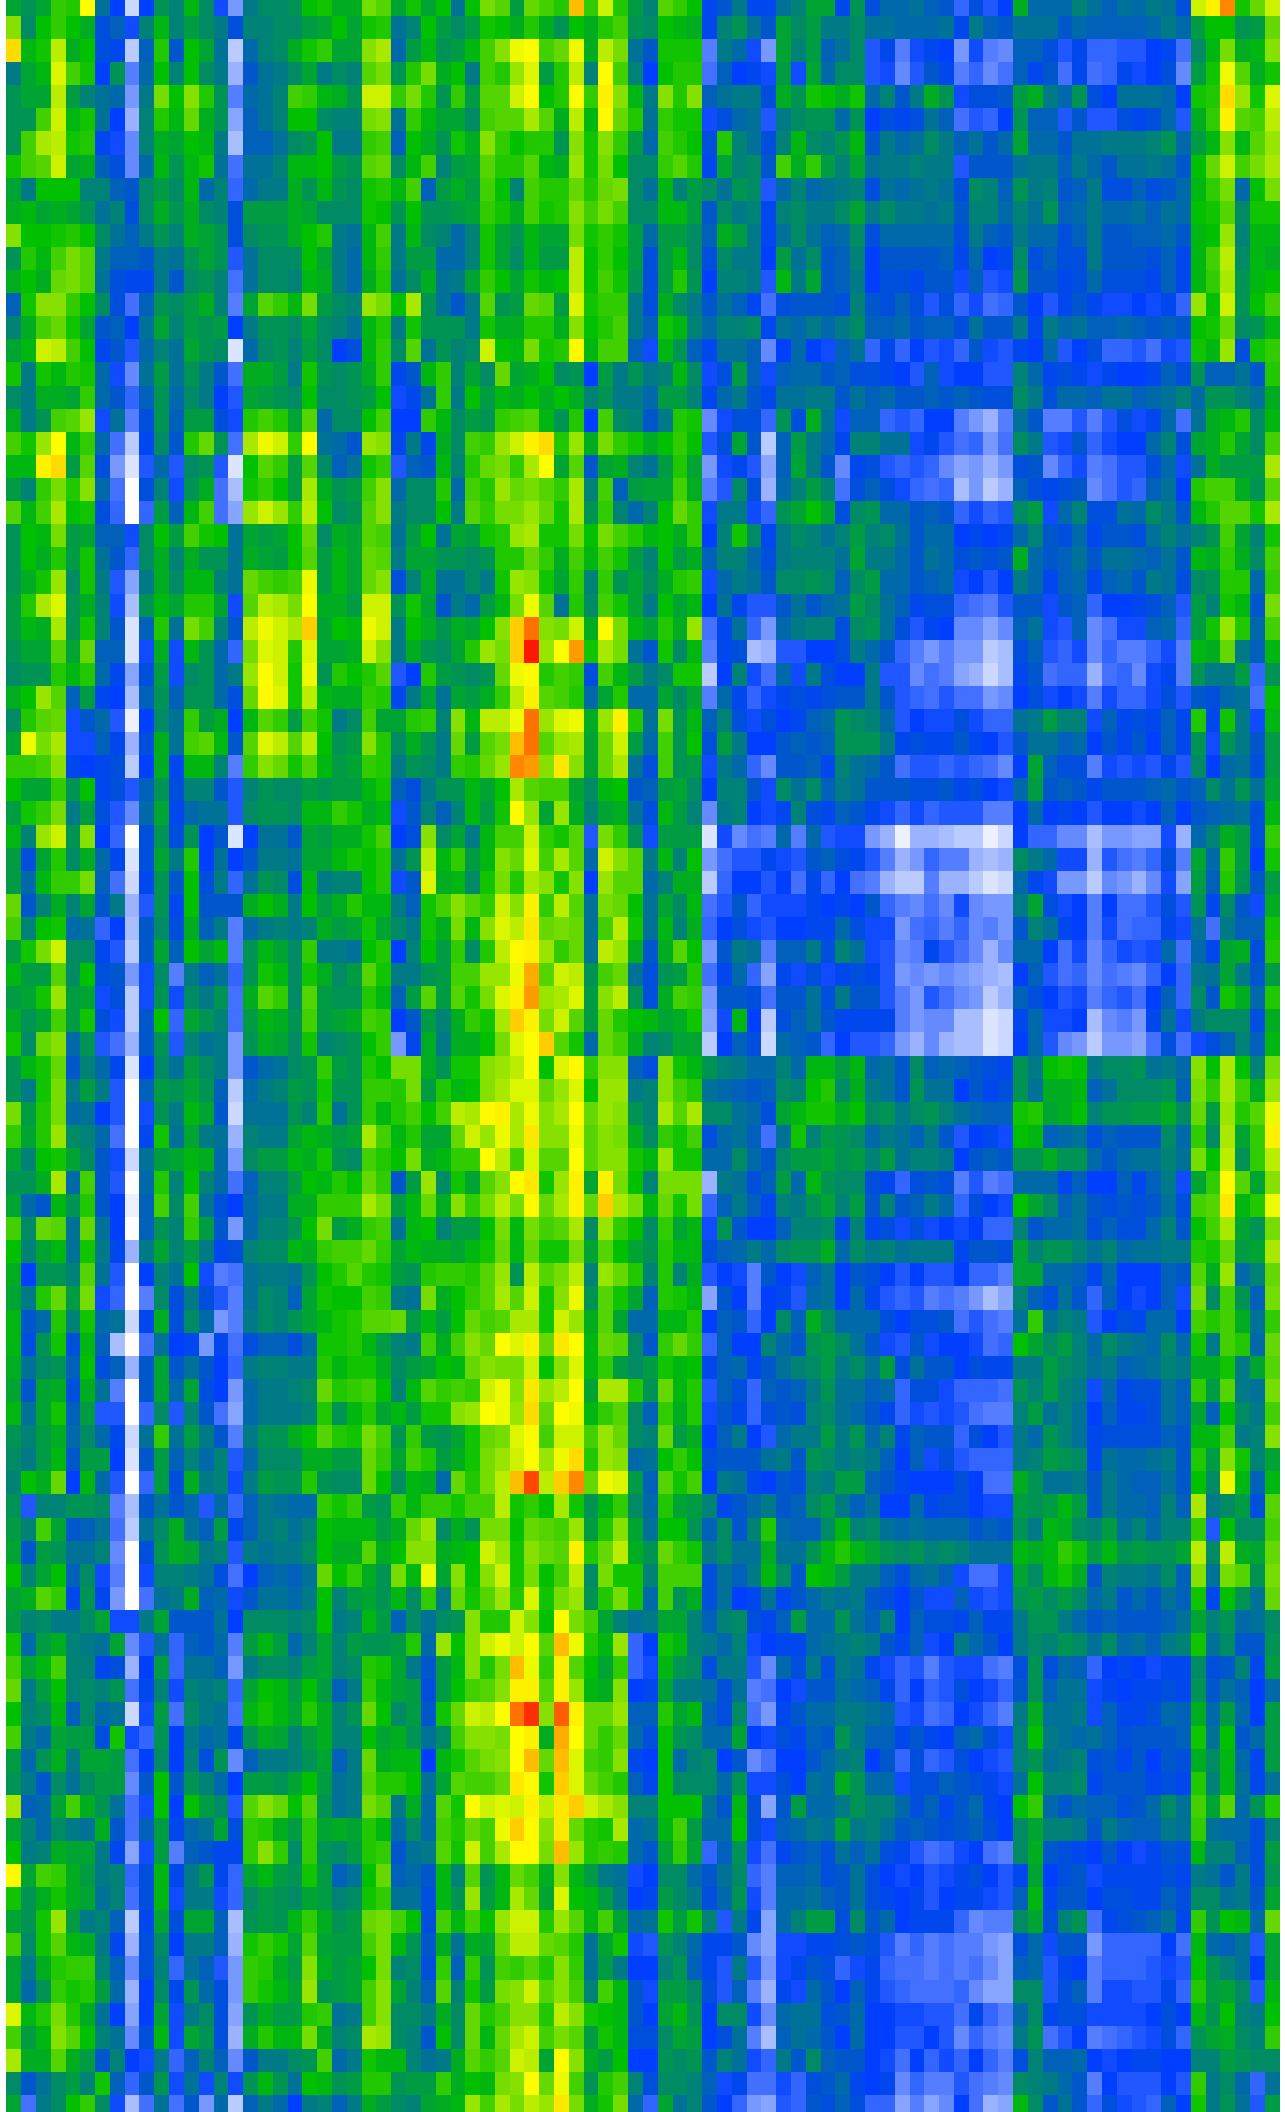

At3g50810  
At2g29150  
At1g69790  
At2g46080  
At5g20610  
At2g04620  
At4g00500  
At1g70920  
At1g20640  
At5g55350  
At1g19210  
At4g27654  
At4g27652  
At1g10940  
At1g12940  
At4g33890  
At4g02940  
At3g61930  
At2g37760  
At5g56190  
At5g63880  
At4g18580  
At5g13820  
At1g56410  
At1g17745  
At5g41860  
At4g00550  
At2g22690  
At2g31350  
At4g15940  
At1g67810  
At5g06560  
At2g01450  
At5g62460  
At1g02310  
At5g46230  
At1g65820  
At2g02040  
At4g36760  
At5g65110  
At4g23050  
At5g20910  
At5g11680  
At3g19950  
At5g56150  
At4g11600  
At1g58100  
At2g01735  
At1g66340  
At5g47480  
At4g15240  
At2g04900  
At1g07380  
At5g08335  
At4g03490  
At4g01610  
At1g27980  
At2g21180  
At2g44100  
At1g23120  
At3g50210  
At5g11090  
At5g58540  
At3g16740  
At3g57340  
At3g14920  
At5g09400  
At3g07100  
At3g06720  
At5g60300  
At1g17430  
At5g23340  
At1g05340  
At5g02020  
At1g29760  
At5g39660  
At3g06380  
At1g64660  
At4g30790  
At2g45040  
At1g35190  
At3g15500  
At2g31945  
At3g23540  
At4g10960  
At1g12640  
At5g54870  
At3g19580  
At5g54730  
At1g22190  
At5g43600  
At1g11910

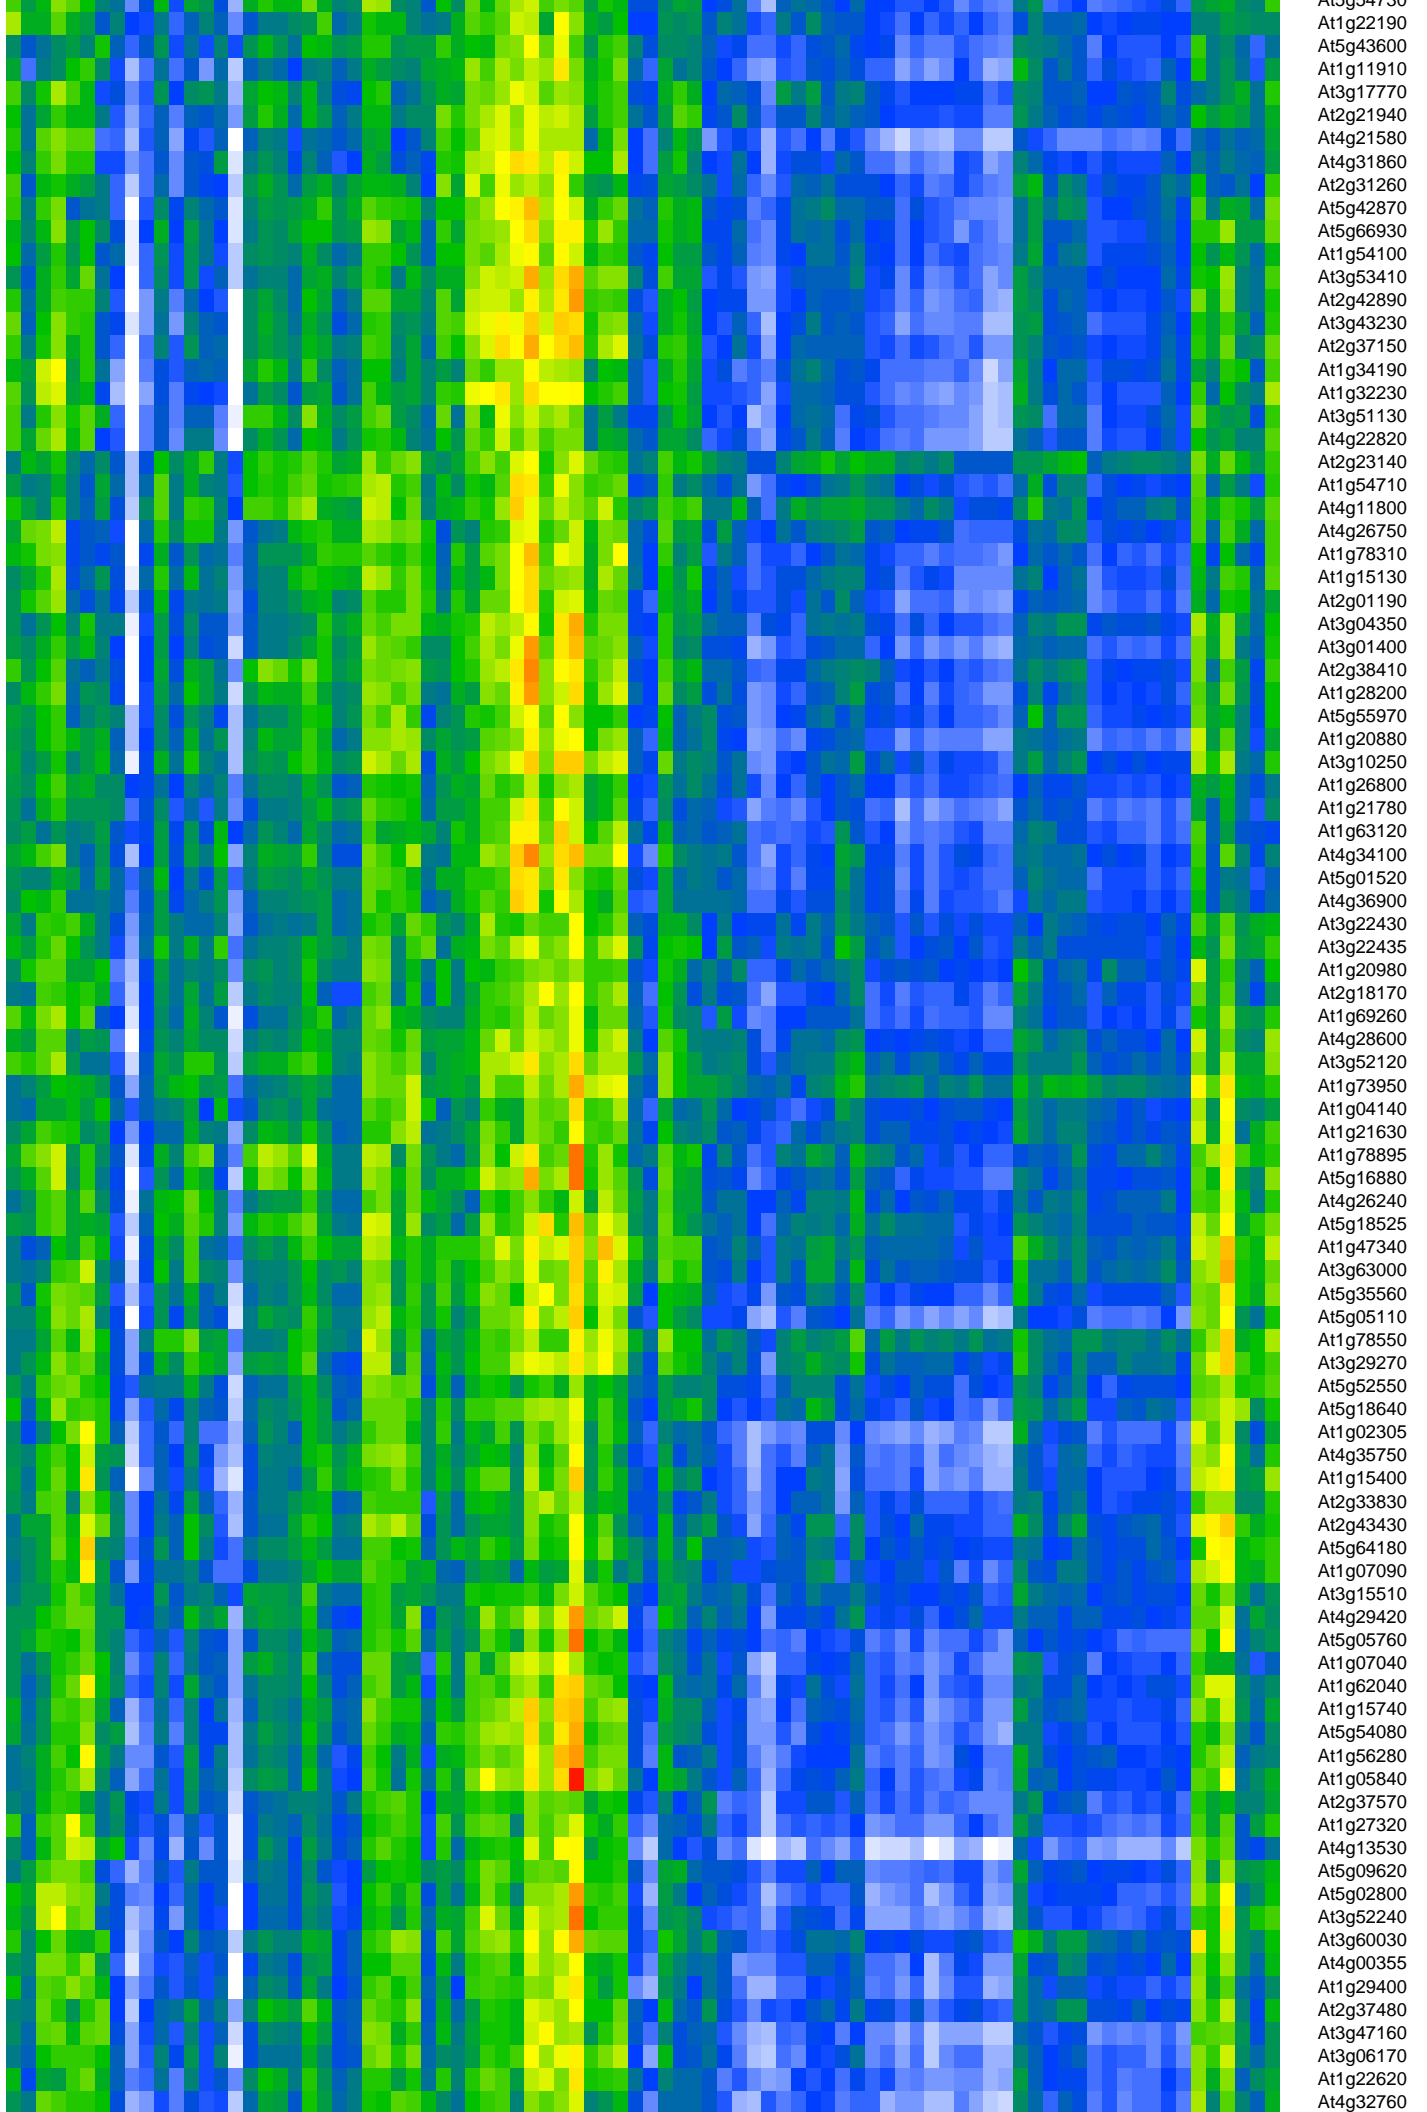

At3g94750  
At1g22190  
At5g43600  
At1g11910  
At3g17770  
At2g21940  
At4g21580  
At4g31860  
At2g31260  
At5g42870  
At5g66930  
At1g54100  
At3g53410  
At2g42890  
At3g43230  
At2g37150  
At1g34190  
At1g32230  
At3g51130  
At4g22820  
At2g23140  
At1g54710  
At4g11800  
At4g26750  
At1g78310  
At1g15130  
At2g01190  
At3g04350  
At3g01400  
At2g38410  
At1g28200  
At5g55970  
At1g20880  
At3g10250  
At1g26800  
At1g21780  
At1g63120  
At4g34100  
At5g01520  
At4g36900  
At3g22430  
At3g22435  
At1g20980  
At2g18170  
At1g69260  
At4g28600  
At3g52120  
At1g73950  
At1g04140  
At1g21630  
At1g78895  
At5g16880  
At4g26240  
At5g18525  
At1g47340  
At3g63000  
At5g35560  
At5g05110  
At1g78550  
At3g29270  
At5g52550  
At5g18640  
At1g02305  
At4g35750  
At1g15400  
At2g33830  
At2g43430  
At5g64180  
At1g07090  
At3g15510  
At4g29420  
At5g05760  
At1g07040  
At1g62040  
At1g15740  
At5g54080  
At1g56280  
At1g05840  
At2g37570  
At1g27320  
At4g13530  
At5g09620  
At5g02800  
At3g52240  
At3g60030  
At4g00355  
At1g29400  
At2g37480  
At3g47160  
At3g06170  
At1g22620  
At4g32760

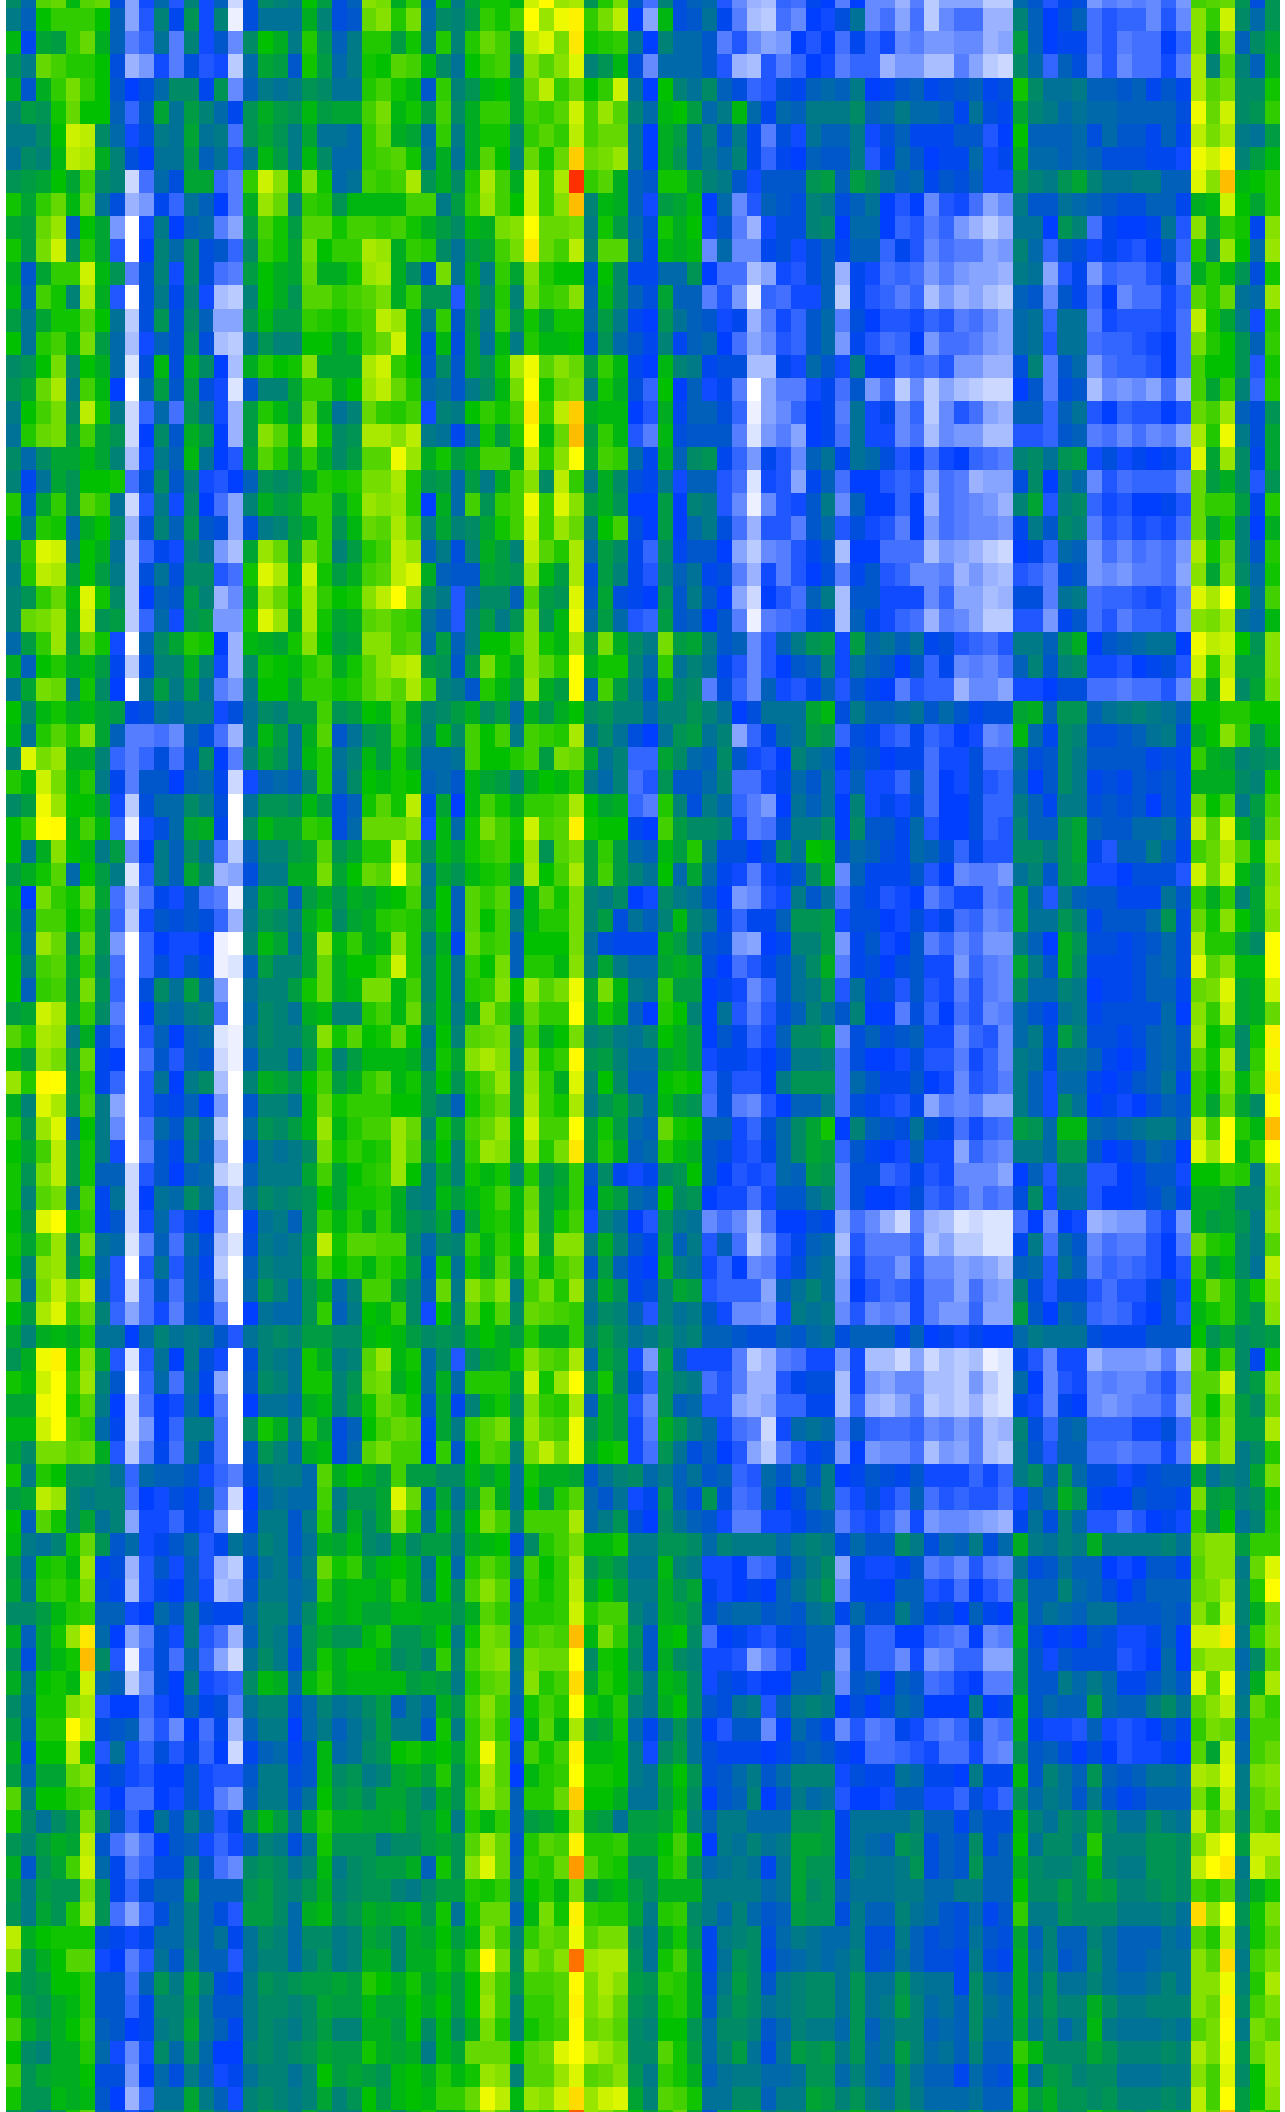

At3g06170  
At1g22620  
At4g32760  
At5g38220  
At4g28530  
At4g33040  
At4g09890  
At5g16110  
At4g00720  
At5g39520  
At1g48790  
At1g04970  
At1g16180  
At1g23040  
At1g53580  
At4g35860  
At1g17080  
At1g16240  
At1g29970  
At1g58030  
At5g59960  
At4g19860  
At4g11360  
At2g36320  
At4g31090  
At4g32150  
At3g12630  
At1g69980  
At4g36630  
At1g03900  
At5g47370  
At5g20350  
At5g01710  
At4g11300  
At1g54115  
At5g16800  
At2g03730  
At1g02860  
At3g08650  
At1g10730  
At1g54320  
At5g43780  
At1g71190  
At3g54300  
At2g16720  
At1g10140  
At3g54620  
At5g55860  
At5g35200  
At1g74730  
At3g63310  
At2g29420  
At1g23440  
At1g75440  
At1g23440  
At3g22460  
At1g79380  
At1g60380  
At4g24990  
At1g32700  
At4g13270  
At2g01600  
At1g18470  
At4g24100  
At4g28860  
At5g03240  
At2g24762  
At2g46690  
At5g59780  
At1g20160  
At1g14340  
At5g04750  
At4g14410  
At4g01390  
At5g63710  
At2g39930  
At1g66140  
At5g35450  
At5g46115  
At3g45160  
At1g72630  
At1g11915  
At5g06610  
At4g25434  
At4g00940  
At4g33450  
At1g49320  
At4g37970  
At1g25530  
At1g30760  
At2g22680

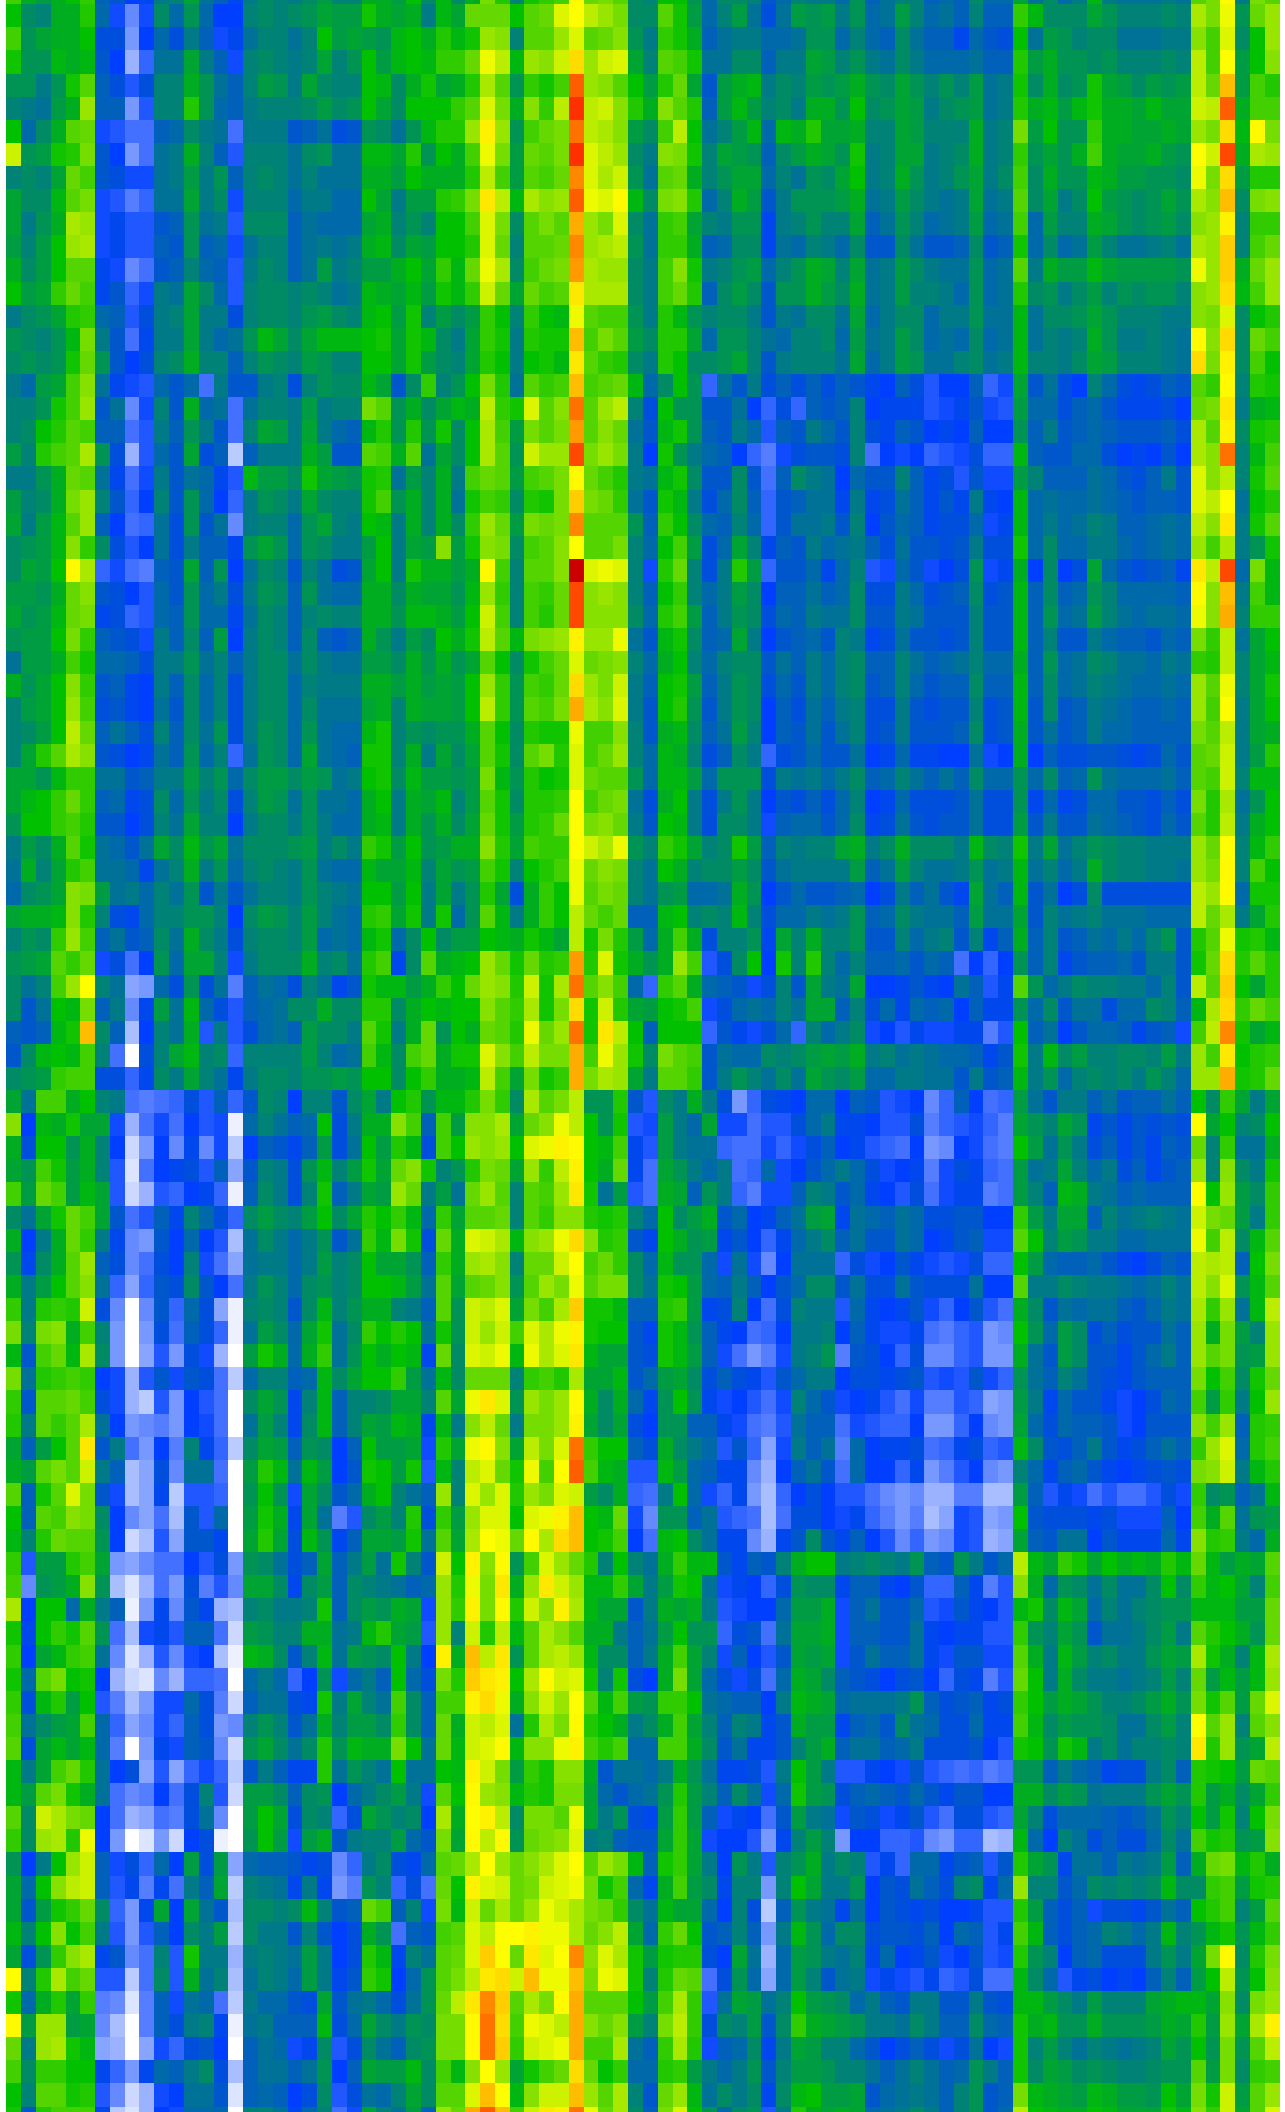

At1g25530  
At1g30760  
At2g22680  
At2g43660  
At2g39705  
At5g53890  
At2g20550  
At5g60450  
At1g17590  
At5g06510  
At3g05690  
At4g29100  
At5g56460  
At4g38340  
At3g27650  
At5g23810  
At2g43200  
At2g18050  
At4g36450  
At1g10210  
At4g22790  
At5g40960  
At1g07300  
At4g10310  
At1g78815  
At5g63580  
At5g65040  
At1g12320  
At1g19630  
At1g21880  
At3g28360  
At3g62960  
At5g16570  
At3g28620  
At5g16080  
At5g64530  
At2g27220  
At2g37900  
At3g01860  
At3g56620  
At1g59670  
At5g65850  
At4g35230  
At5g19200  
At5g14680  
At4g38240  
At2g14210  
At3g61180  
At4g14990  
At1g72710  
At2g25490  
At5g23450  
At4g04955  
At2g31960  
At4g34680  
At1g55760  
At5g57910  
At3g19190  
At5g66250  
At3g57540  
At1g24560  
At1g01360  
At2g28910  
At3g02340  
At1g22930  
At3g19420  
At3g48880  
At3g51830  
At5g06260  
At5g63620  
At1g60490  
At3g26100  
At5g20730  
At1g53590  
At5g37500  
At5g52510  
At5g16730  
At2g44430  
At4g18140  
At4g19640  
At5g03660  
At5g24450  
At1g73980  
At2g10950  
At4g31410  
At2g20410  
At2g01470  
At5g65240  
At3g55270  
At4g36140  
At5g53570

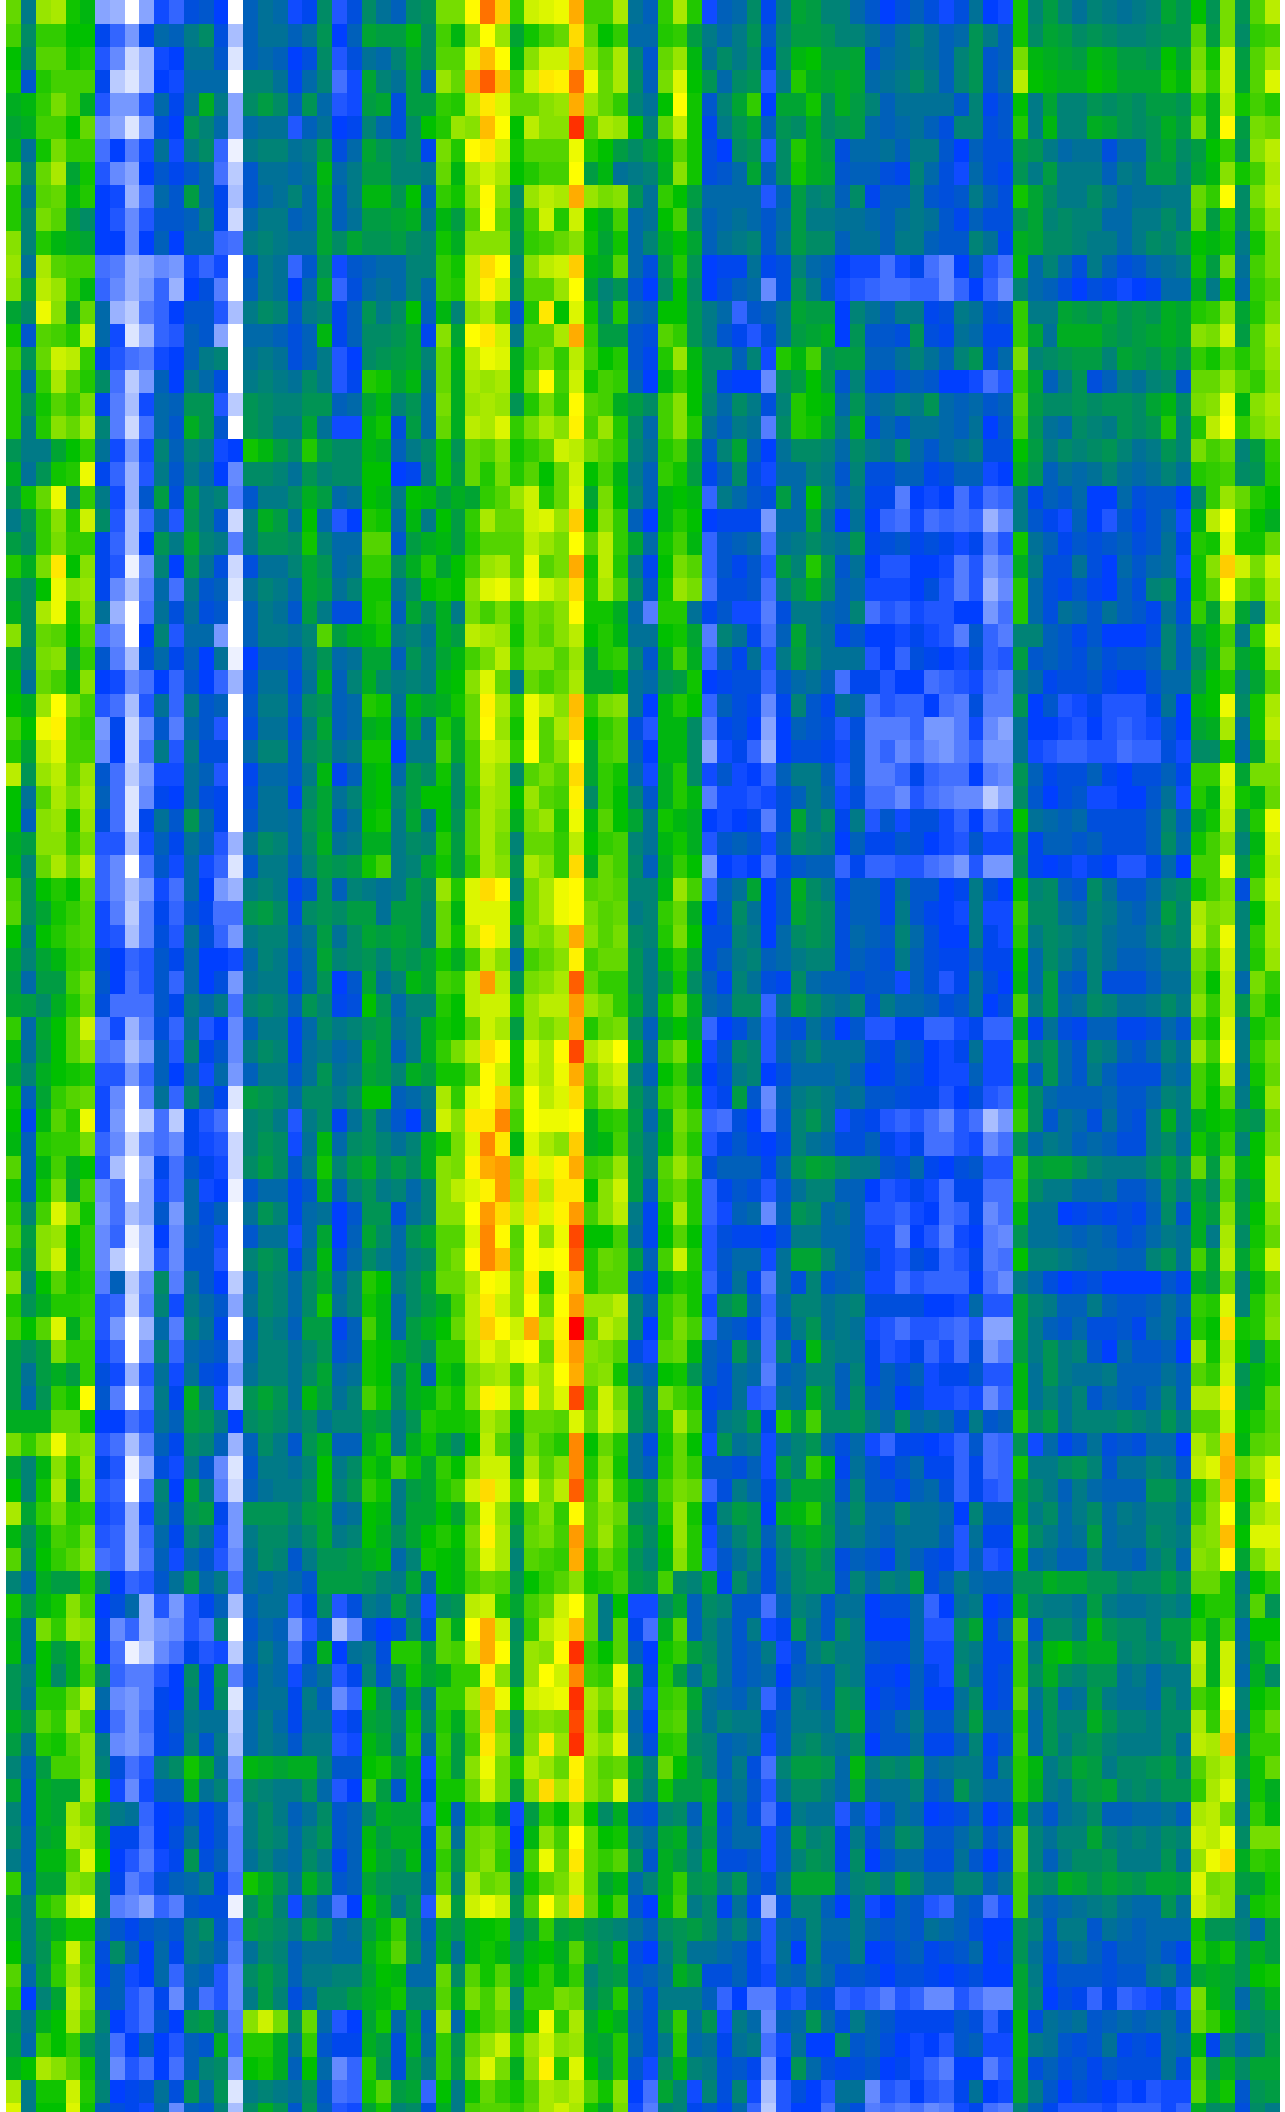

At3g55270  
At4g36140  
At5g53570  
At5g55600  
At4g18300  
At1g71080  
At2g42160  
At3g27610  
At4g30360  
At3g06620  
At3g24310  
At2g18750  
At1g78080  
At2g28840  
At4g21450  
At3g16940  
At1g65580  
At4g17670  
At3g17250  
At4g01430  
At1g14130  
At2g44350  
At2g02760  
At2g41700  
At1g34300  
At4g02640  
At2g24360  
At2g31990  
At2g05320  
At5g58787  
At2g45910  
At1g21450  
At5g58350  
At1g08720  
At1g32340  
At5g47580  
At4g19370  
At1g77920  
At2g24140  
At1g17950  
At2g04038  
At3g46130  
At5g66030  
At5g58980  
At1g62810  
At1g72830  
At2g33770  
At1g52080  
At5g04850  
At2g32260  
At1g75850  
At5g06960  
At5g50380  
At5g46410  
At1g32130  
At2g36950  
At2g48010  
At2g17520  
At2g45210  
At5g03200  
At1g65000  
At3g28390  
At5g66630  
At2g38800  
At2g17570  
At1g70920  
At1g55610  
At1g12200  
At2g38050  
At3g07360  
At1g02120  
At1g02100  
At1g75800  
At1g48430  
At5g46760  
At4g25970  
At3g20290  
At4g14270  
At4g34560  
At5g27950  
At1g74940  
At1g77660  
At4g30630  
At1g67360  
At3g61890  
At2g46680  
At4g30960  
At4g19040  
At5g18190  
At2g25850  
At1g17550  
At2g11410



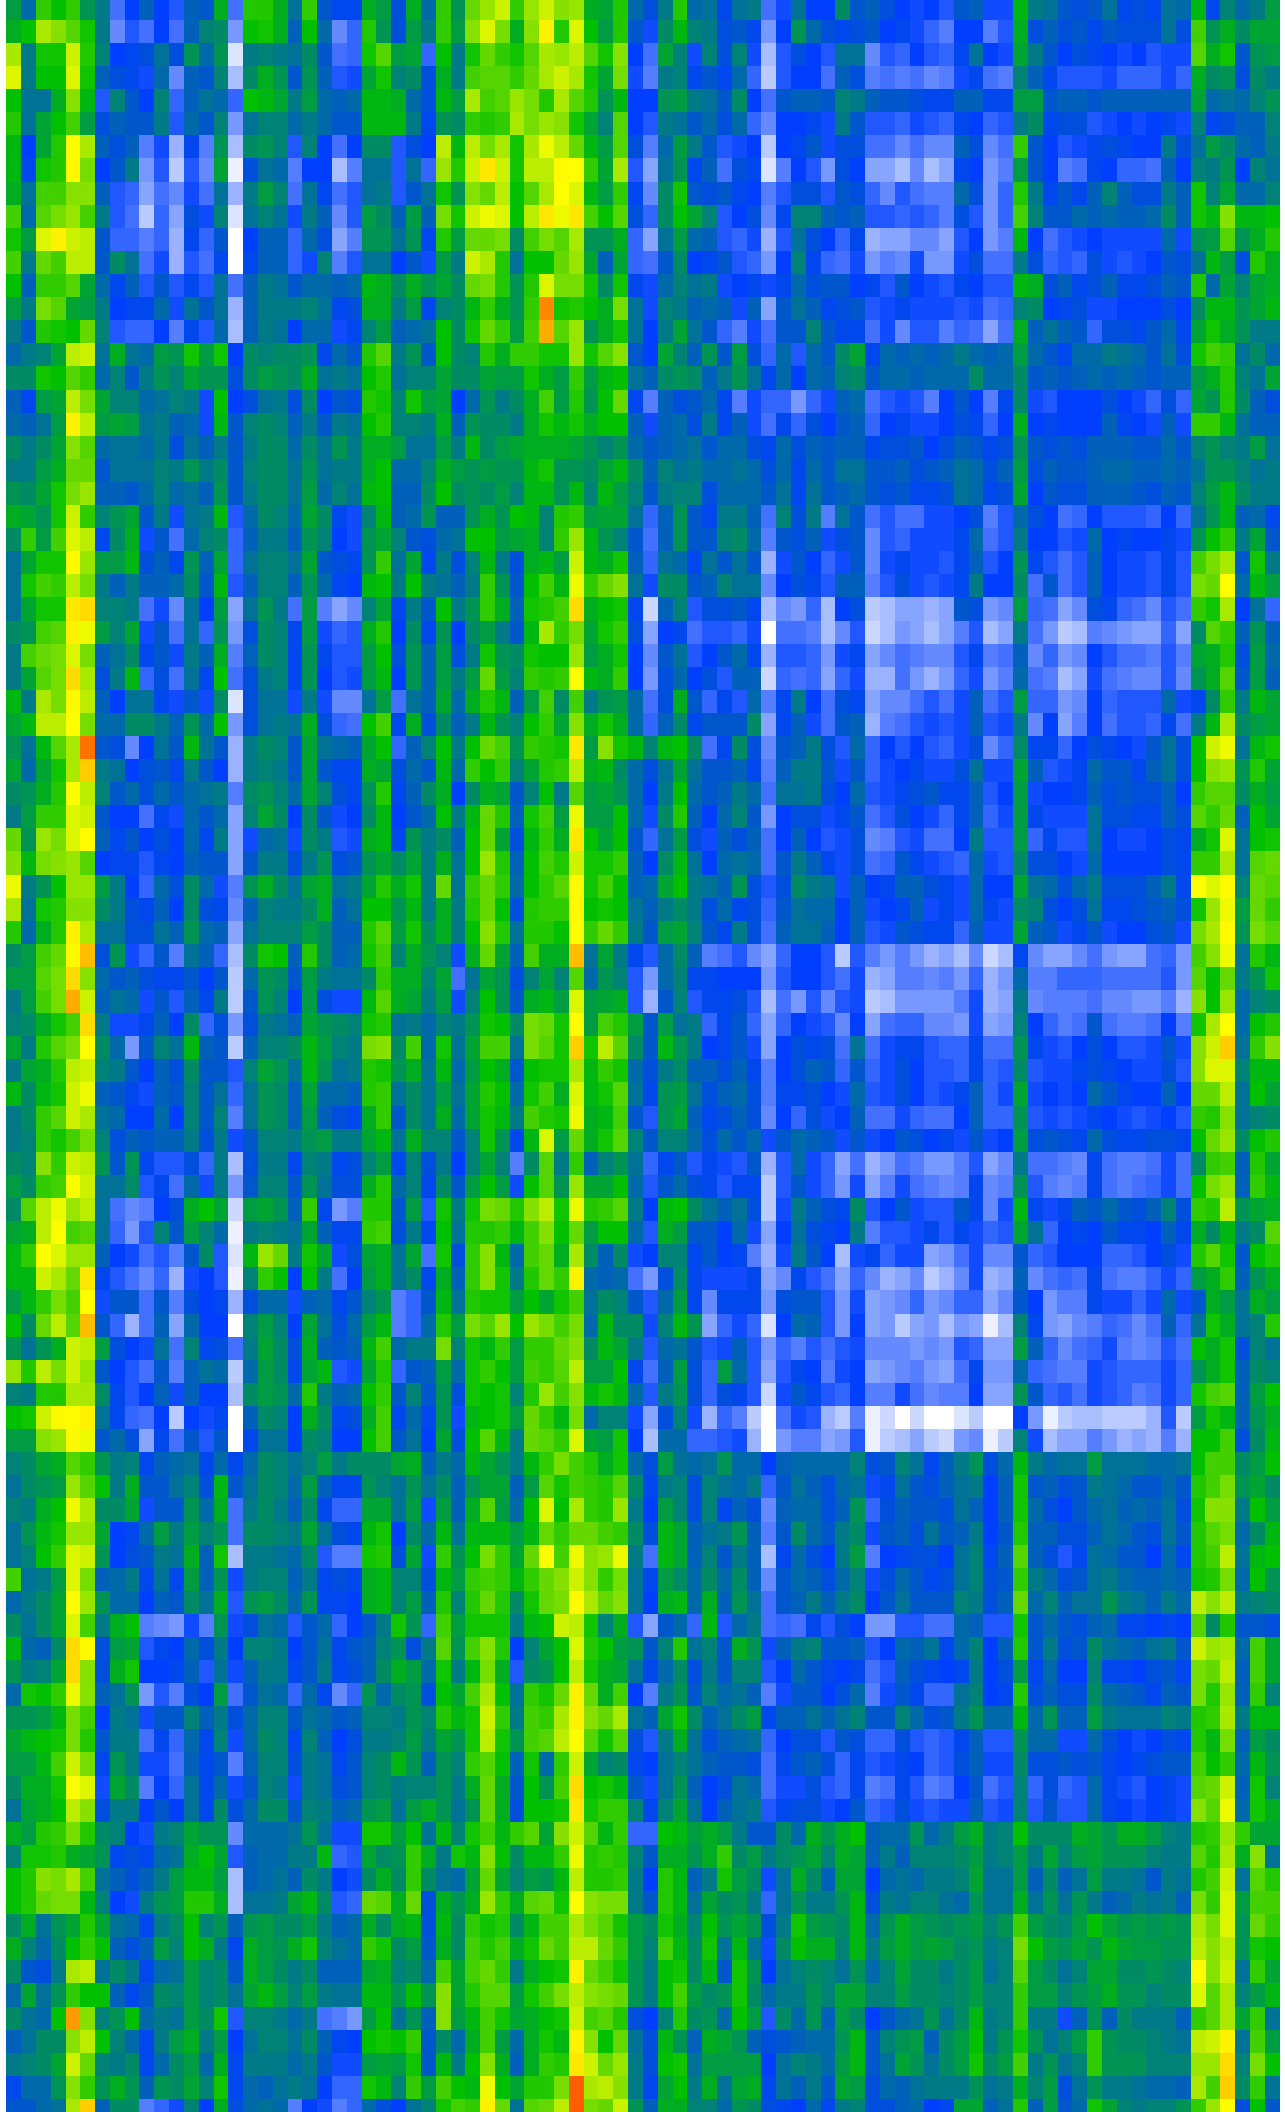

At5g18190  
At2g25850  
At1g17550  
At3g11410  
At1g72770  
At5g57050  
At5g53350  
At1g30090  
At1g28520  
At2g15900  
At4g31170  
At3g12360  
At3g22380  
At1g22770  
At1g20693  
At1g08230  
At1g62760  
At1g05940  
At1g11700  
At3g13672  
At1g66390  
At2g33080  
At4g27657  
At5g16200  
At1g69970  
At5g49630  
At2g47710  
At4g09760  
At3g53960  
At2g07718  
At3g26600  
At4g08480  
At1g53030  
At3g51000  
At4g36710  
At1g24575  
At5g45250  
At1g61660  
At1g78110  
At5g57340  
At2g37650  
At3g07870  
At4g01070  
At2g35940  
At2g24940  
At1g22040  
At2g31110  
At1g73040  
At4g16000  
At1g49230  
At4g00880  
At5g49660  
At3g11880  
At1g04780  
At2g33390  
At5g46250  
At2g31200  
At5g42300  
At1g47960  
At1g73500  
At5g14940  
At4g29160  
At2g31820  
At1g76800  
At4g30110  
At2g45660  
At1g16500  
At5g02620  
At1g54150  
At1g22160  
At1g31440  
At5g23760  
At4g17880  
At5g57940  
At3g10120  
At3g29670  
At5g25140  
At2g04795  
At3g63110  
At5g13760  
At3g15530  
At3g24050  
At1g22870  
At1g31490  
At5g01200  
At3g21250  
At1g02070  
At5g25220  
At3g21270  
At2g29970  
At3g42630  
At1g08110

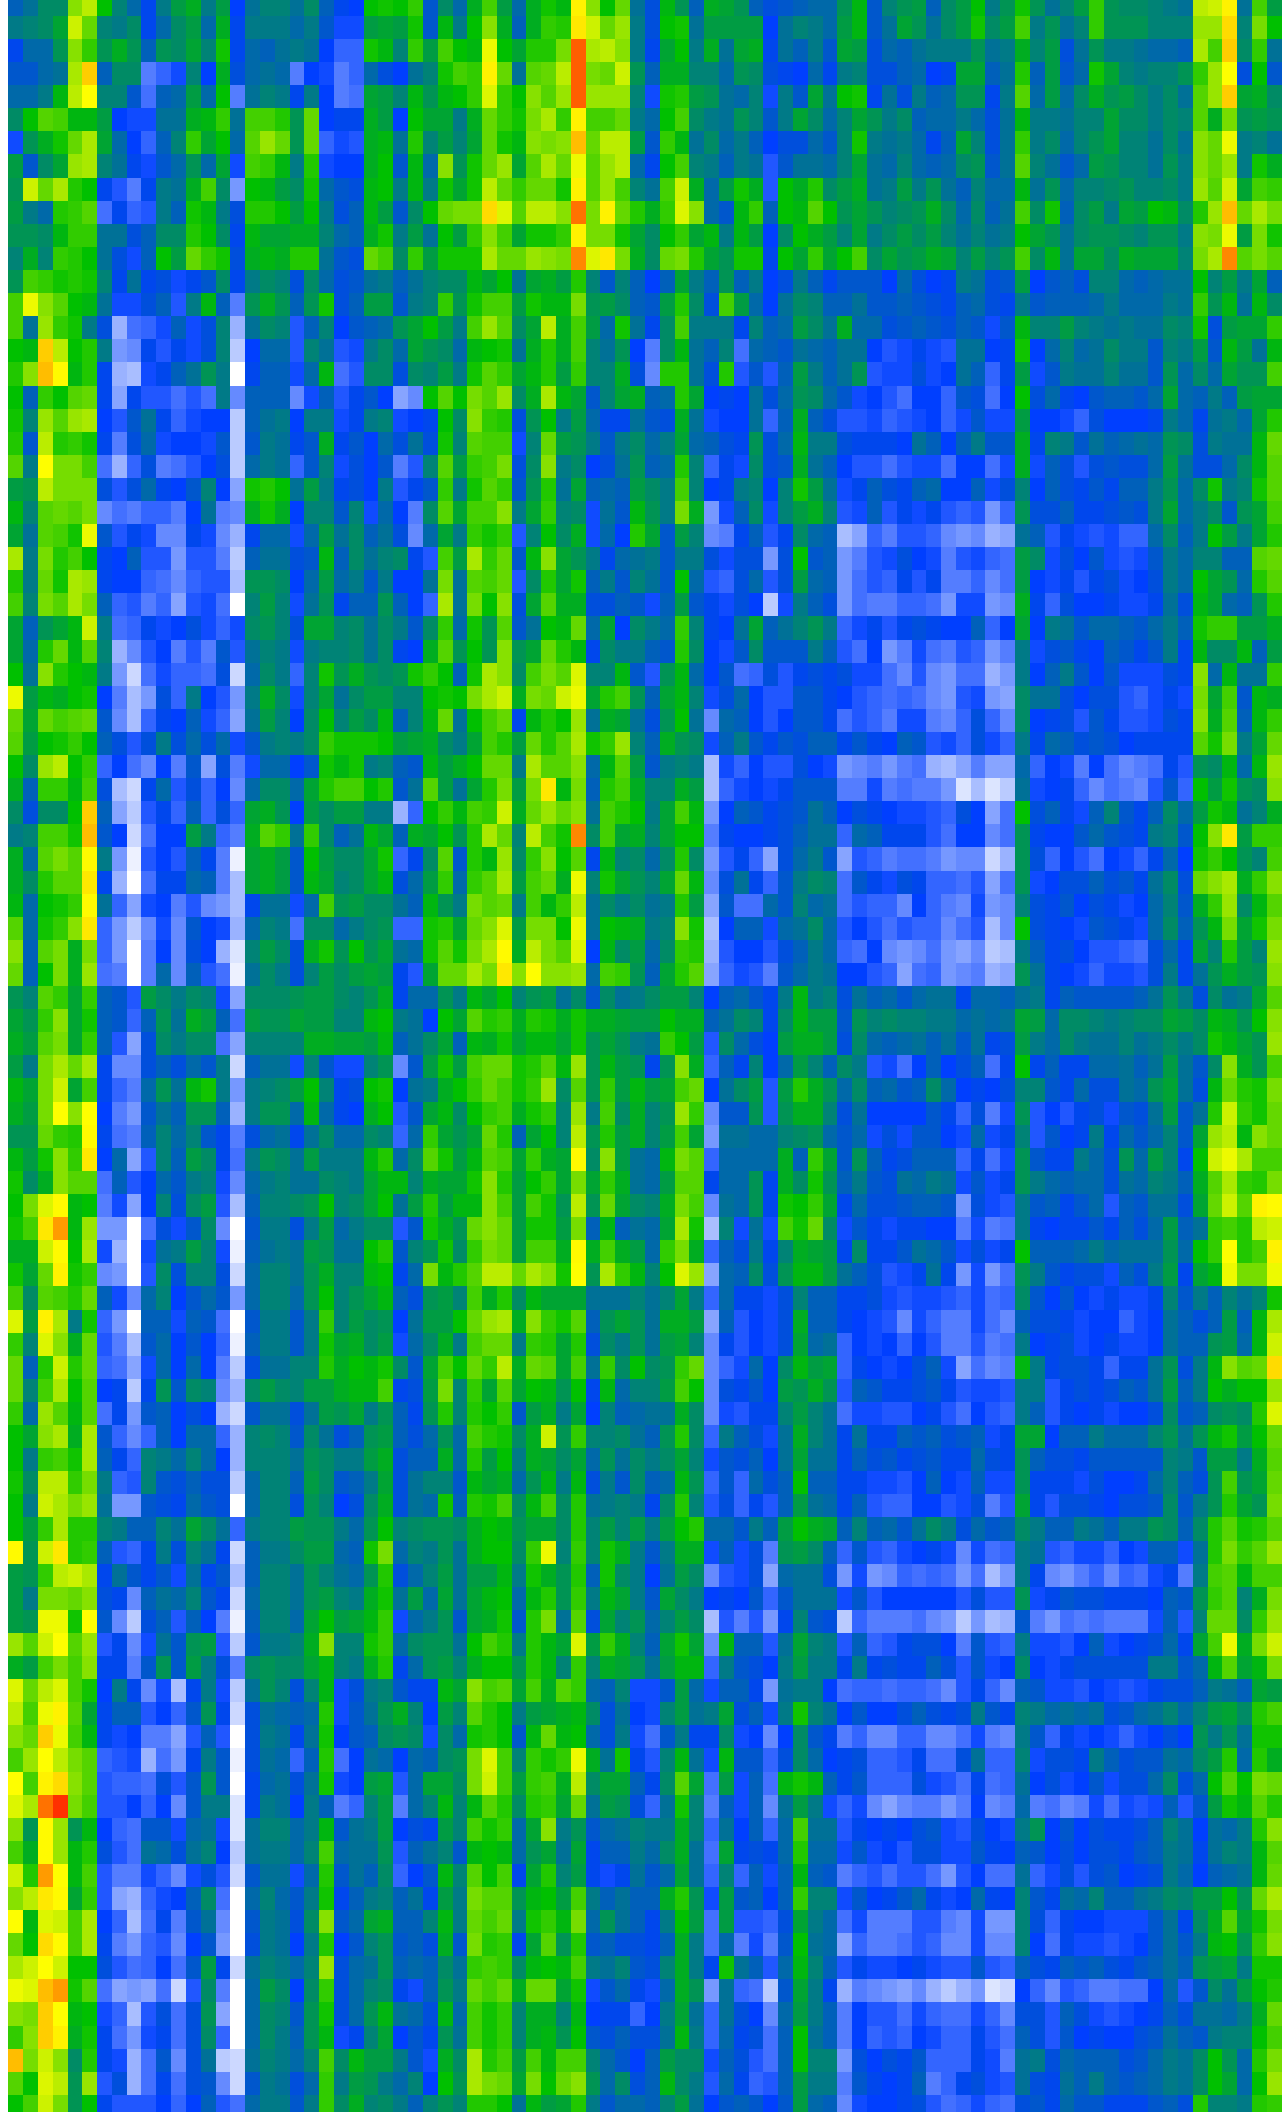

At3g21270  
At2g29970  
At3g42630  
At1g08110  
At2g45530  
At5g60710  
At4g17640  
At4g04320  
At4g34990  
At5g19280  
At2g21450  
At1g50970  
At4g19850  
At1g30040  
At5g06600  
At5g57580  
At2g11520  
At2g01350  
At4g11840  
At1g67550  
At3g03560  
At3g50550  
At5g35680  
At2g35635  
At2g03500  
At3g26590  
At2g15310  
At1g12400  
At5g43280  
At2g38020  
At1g71960  
At5g62680  
At1g43650  
At5g10030  
At3g27300  
At1g27530  
At2g34690  
At4g33780  
At5g16450  
At3g02770  
At5g29000  
At1g27000  
At2g02390  
At2g13810  
At1g52010  
At5g62150  
At3g45620  
At4g02550  
At1g15790  
At1g19130  
At3g01970  
At5g19875  
At1g66480  
At5g18310  
At3g26090  
At3g13380  
At3g11080  
At2g47130  
At1g12290  
At2g01980  
At3g04070  
At2g24180  
At2g16700  
At4g10500  
At3g48080  
At5g49570  
At3g57100  
At4g01550  
At4g16790  
At5g45380  
At4g18930  
At5g46780  
At1g72540  
At2g40000  
At4g01090  
At4g32020  
At5g58430  
At2g22300  
At1g70520  
At5g46520  
At3g52430  
At5g42440  
At1g76040  
At5g04720  
At4g33300  
At3g46620  
At2g06530  
At4g25390  
At5g45110  
At3g62420  
At1g76560  
At5g04310

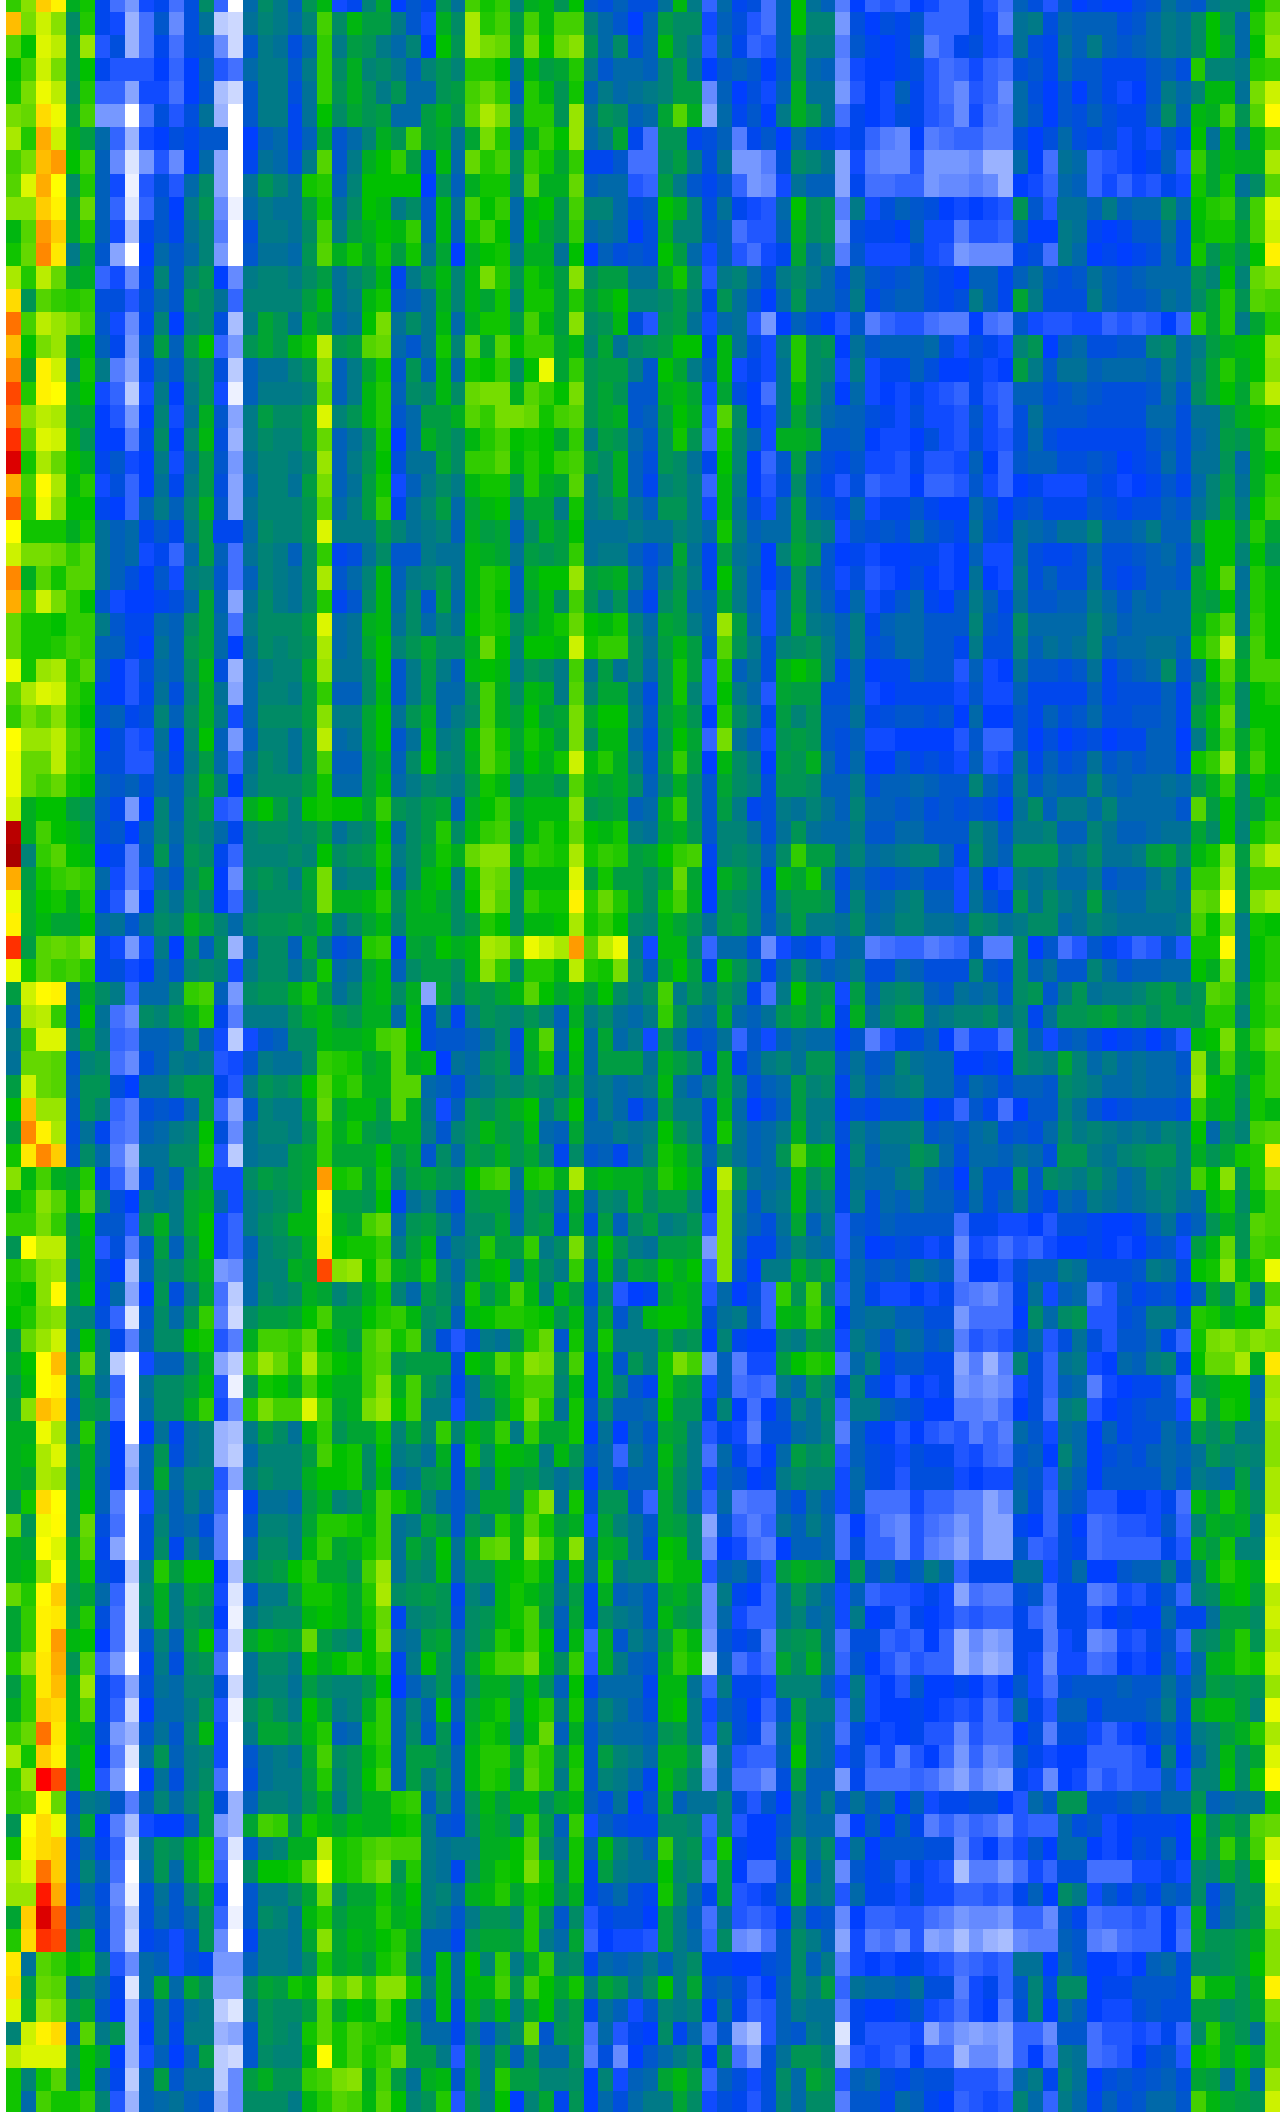

At3g43110  
At3g62420  
At1g76560  
At5g04310  
At3g47510  
At1g08940  
At4g24290  
At3g48760  
At3g10985  
At1g28280  
At1g79670  
At2g20010  
At2g47950  
At1g67000  
At3g63050  
At1g77890  
At3g55450  
At4g04960  
At3g08720  
At5g59820  
At1g23710  
At4g17500  
At1g28480  
At5g45340  
At4g27280  
At5g61600  
At1g32640  
At1g20823  
At5g51190  
At3g10930  
At3g61190  
At5g17350  
At2g41640  
At2g41010  
At4g34410  
At4g19230  
At2g15780  
At5g66670  
At1g66400  
At5g44350  
At4g15100  
At1g05060  
At5g58680  
At1g28250  
At1g52720  
At3g15730  
At4g18070  
At5g67210  
At1g17620  
At4g10390  
At5g47730  
At3g23630  
At1g72950  
At1g63530  
At5g43170  
At5g47960  
At3g49780  
At5g53590  
At5g50720  
At5g25540  
At5g47120  
At3g19260  
At1g15670  
At4g32870  
At2g45220  
At2g21620  
At4g04800  
At4g26060  
At5g48410  
At2g17760  
At3g51440  
At5g51640  
At1g45145  
At3g13910  
At3g55470  
At1g19270  
At1g67800  
At1g07630  
At1g06800  
At5g56760  
At3g13320  
At3g54100  
At4g33430  
At2g32240  
At5g11970  
At4g03820  
At5g51680  
At1g08920  
At1g32460  
At2g44500  
At1g74020  
At1g63010

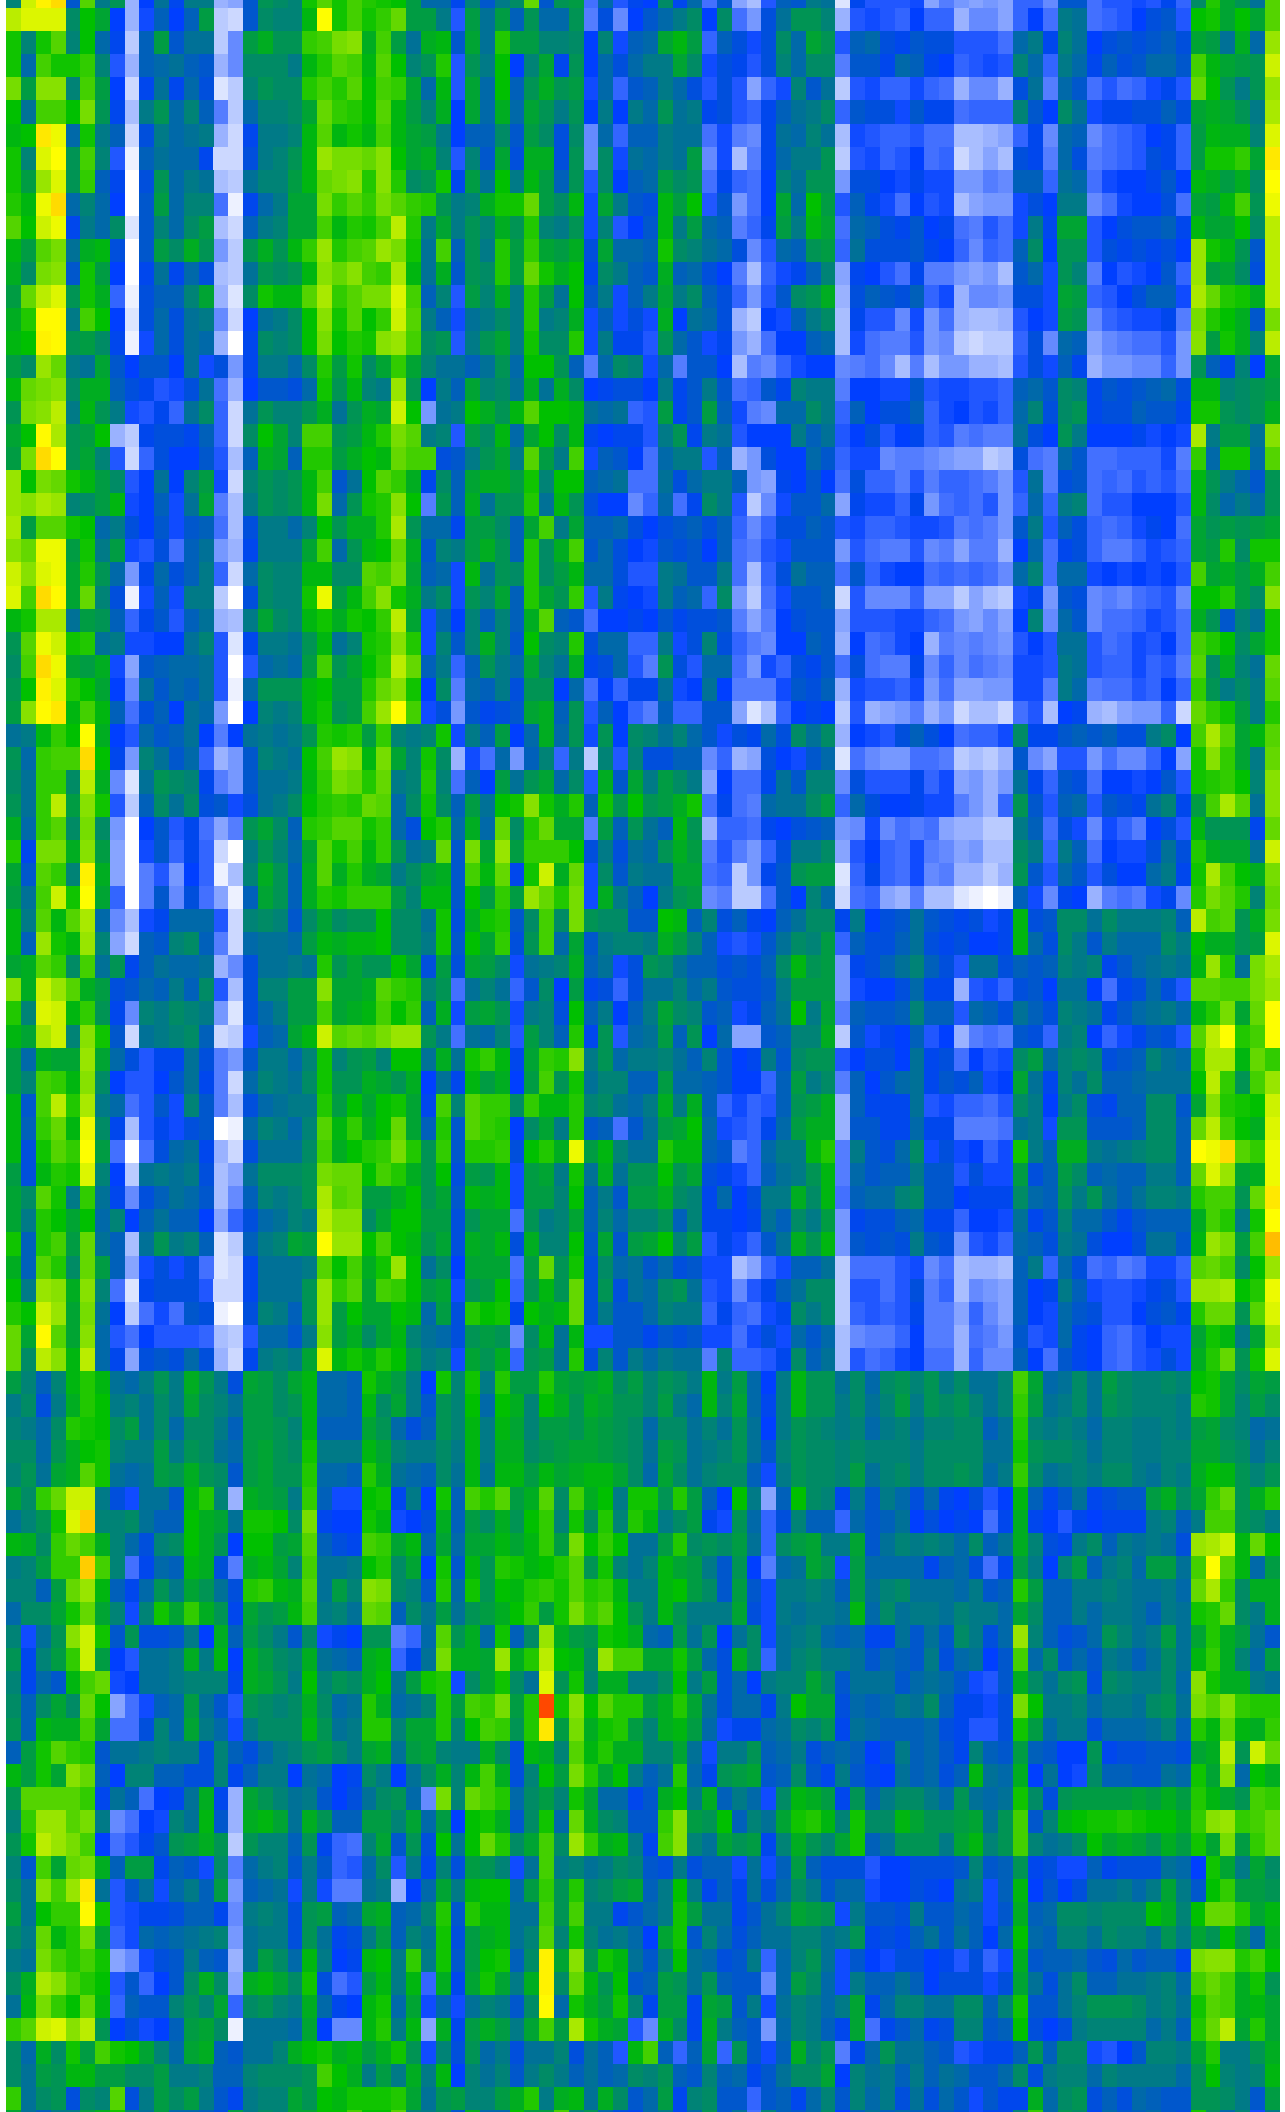

At2g44500  
At1g74020  
At1g63010  
At3g56170  
At4g00700  
At5g54500  
At1g69450  
At3g49210  
At5g35370  
At4g15610  
At1g63840  
At1g09920  
At3g02460  
At3g03000  
At1g08800  
At5g42250  
At5g03520  
At2g45820  
At5g17910  
At2g43180  
At5g62020  
At2g32150  
At1g27200  
At3g23030  
At4g37790  
At4g17900  
At1g20440  
At5g52120  
At1g54090  
At2g39440  
At1g76180  
At5g39730  
At3g23600  
At3g62580  
At5g53530  
At2g26230  
At5g64370  
At3g17020  
At1g49300  
At1g17745  
At4g29220  
At1g22885  
At1g70750  
At4g12010  
At1g59580  
At2g40530  
At5g09220  
At5g05700  
At1g68300  
At5g12200  
At1g67950  
At3g13730  
At1g72300  
At3g23200  
At3g45590  
At3g28950  
At2g24550  
At1g27130  
At1g23830  
At5g59320  
At5g59310  
At1g65480  
At5g57520  
At3g19550  
At1g03290  
At5g11910  
At3g25620  
At3g09085  
At4g26490  
At2g06255  
At1g12050  
At4g04470  
At3g10410  
At5g14550  
At2g25730  
At2g17820  
At1g11330  
At1g70480  
At2g18730  
At5g01850  
At1g19960  
At5g27830  
At3g11230  
At1g48210  
At2g13100  
At3g07080  
At5g27930  
At5g20900  
At2g37950  
At2g25680  
At3g28730

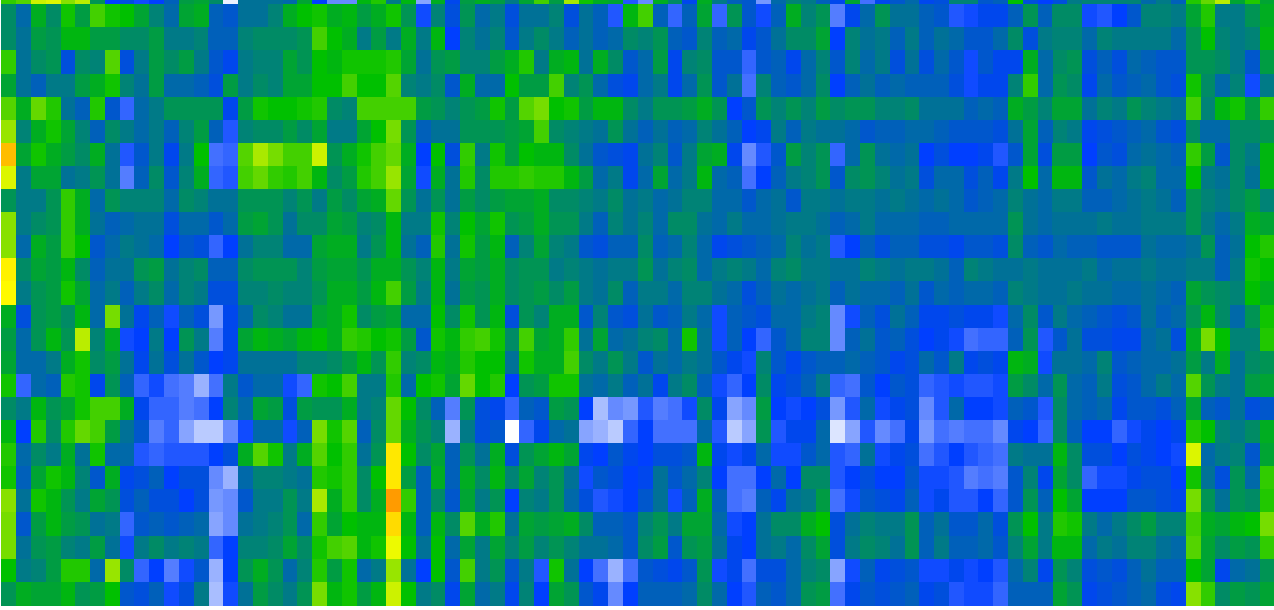A heatmap visualization showing gene expression data. The x-axis represents different samples or conditions, and the y-axis represents individual genes. The color scale ranges from dark blue (low expression) to yellow (high expression). A prominent vertical band of high expression (yellow) is visible in the middle of the heatmap, corresponding to a specific gene across all samples. Other genes show varying levels of expression across the samples, with some showing distinct patterns of up- and down-regulation.

At2g37950  
At2g25680  
At3g28730  
At5g37260  
At2g37840  
At1g60190  
At5g02230  
At3g29575  
At2g41190  
At4g12580  
At4g17030  
At3g13784  
At2g37870  
At4g34138  
At3g24100  
At4g33950  
At5g02480  
At2g47700  
At2g32080  
At1g08190  
At1g79270  
At1g78100  
At4g34000  
At4g33550  
At1g68440  
At5g01810
